# Supplementary material
Source: PubMed Central journal article supplement (PMC3879109)
Supplement: NIHMS504424-supplement-Supplementary_Table_3.pdf [file NIHMS504424-supplement-Supplementary_Table_3.pdf]

**Supplementary Table 3.** Genes annotated in the the C227-11 genome.

| Gen_id | start_position | end_position | Hit_def            | Similar_to                                                            | Protein names                                                                       | Organism                                         |
|--------|----------------|--------------|--------------------|-----------------------------------------------------------------------|-------------------------------------------------------------------------------------|--------------------------------------------------|
| 101503 | 1              | 630          | TY-2482_chromosome | C8TN19                                                                | Putative glucosyl-transferase                                                       | Escherichia coli O26:H11 (strain 11368 / EHEC)   |
| 89819  | 2049           | 778          | TY-2482_chromosome | D3GUR0                                                                | Putative microcin esterase                                                          | Escherichia coli O44:H18 (strain 042 / EAEC)     |
| 2665   | 3638           | 2658         | TY-2482_chromosome | P0CE57                                                                | Transposase insH for insertion sequence element IS5R                                | Escherichia coli (strain K12)                    |
| 71375  | 4222           | 3791         | TY-2482_chromosome | D3GUQ8                                                                | Putative uncharacterized protein mchS3                                              | Escherichia coli O44:H18 (strain 042 / EAEC)     |
| 60152  | 4623           | 4381         | TY-2482_chromosome | D3GUQ7                                                                | Putative uncharacterized protein mchS4                                              | Escherichia coli O44:H18 (strain 042 / EAEC)     |
| 71725  | 5035           | 5241         | TY-2482_chromosome | D3GUQ6                                                                | Microcin H47 immunity protein                                                       | Escherichia coli O44:H18 (strain 042 / EAEC)     |
| 78698  | 5272           | 5496         | TY-2482_chromosome | D3GUQ5                                                                | Microcin H47                                                                        | Escherichia coli O44:H18 (strain 042 / EAEC)     |
| 67590  | 5771           | 7318         | TY-2482_chromosome | D3GUQ4                                                                | Putative microcin H47 biosynthesis protein                                          | Escherichia coli O44:H18 (strain 042 / EAEC)     |
| 38267  | 7347           | 7796         | TY-2482_chromosome | Q83Z99                                                                | Putative acyltransferase MchD                                                       | Escherichia coli                                 |
| 16317  | 7952           | 9223         | TY-2482_chromosome | C3VUZ6                                                                | McnA                                                                                | Escherichia coli                                 |
| 104098 | 9219           | 11318        | TY-2482_chromosome | D3GUQ1                                                                | Probable microcin H47 secretion/processing ATP-binding protein (EC 3.4.22.-         | Escherichia coli O44:H18 (strain 042 / EAEC)     |
| 19086  | 13002          | 12320        | TY-2482_chromosome | Q6KDB0                                                                | McmM protein                                                                        | Escherichia coli                                 |
| 103701 | 13560          | 13105        | TY-2482_chromosome | C8TNJ2                                                                | Putative membraneprotein                                                            | Escherichia coli O26:H11 (strain 11368 / EHEC)   |
| 9766   | 13625          | 13813        | TY-2482_chromosome | A1YN25                                                                | Putative uncharacterized protein                                                    | Escherichia coli                                 |
| 96521  | 14018          | 14524        | TY-2482_chromosome | C8UMU7                                                                | Putative uncharacterized protein                                                    | Escherichia coli O111:H- (strain 11128 / EHEC)   |
| 101414 | 14580          | 15236        | TY-2482_chromosome | B7LG70                                                                | Putative uncharacterized protein                                                    | Escherichia coli (strain 55989 / EAEC)           |
| 66387  | 15260          | 15565        | TY-2482_chromosome | B7LG74                                                                | Putative uncharacterized protein                                                    | Escherichia coli (strain 55989 / EAEC)           |
| 28466  | 15519          | 15794        | TY-2482_chromosome | E3PN47                                                                | Putative uncharacterized protein                                                    | Escherichia coli O78:H11 (strain H10407 / ETEC)  |
| 13722  | 16474          | 17115        | TY-2482_chromosome | Q6WPL3                                                                | Putative uncharacterized protein S14                                                | Escherichia coli                                 |
| 92859  | 17360          | 20038        | TY-2482_chromosome | C8UMV2                                                                | Putative UvrD/REP helicase-like protein                                             | Escherichia coli O111:H- (strain 11128 / EHEC)   |
| 91886  | 20550          | 21779        | TY-2482_chromosome | B7LFS5                                                                | Immunoglobulin-binding regulator                                                    | Escherichia coli (strain 55989 / EAEC)           |
| 14374  | 21915          | 22609        | TY-2482_chromosome | E1U309                                                                | Transposase InsAB'                                                                  | Escherichia coli                                 |
| 45719  | 22628          | 23468        | TY-2482_chromosome | Q9LA20                                                                | InsB                                                                                | Shigella dysenteriae                             |
| 28540  | 24952          | 23657        | TY-2482_chromosome | B1LP50                                                                | Anaerobic C4-dicarboxylate transporter, DcuA family                                 | Escherichia coli (strain SMS-3-5 / SECEC)        |
| 19288  | 25737          | 25021        | TY-2482_chromosome | B1EEY8                                                                | Aspartate racemase (EC 5.1.1.13)                                                    | Escherichia albertii TW07627                     |
| 10857  | 26082          | 27023        | TY-2482_chromosome | D8AHZ6                                                                | LysR substrate binding domain protein                                               | Escherichia coli MS 116-1                        |
| 25147  | 27522          | 27758        | TY-2482_chromosome | Q8FEA4                                                                | Putative uncharacterized protein                                                    | Escherichia coli O6                              |
| 34188  | 27603          | 27147        | TY-2482_chromosome | P59697                                                                | Transposase for insertion sequence element IS200                                    | Salmonella typhi                                 |
| 15181  | 28377          | 28012        | TY-2482_chromosome | D8AHZ3                                                                | Conserved domain protein (Fragment)                                                 | Escherichia coli MS 116-1                        |
| 78489  | 29109          | 28757        | TY-2482_chromosome | D3GX03                                                                | Insertion sequence IS100, ATP-binding protein                                       | Escherichia coli O44:H18 (strain 042 / EAEC)     |
| 9330   | 29682          | 29017        | TY-2482_chromosome | Q5I3K9                                                                | Aec56                                                                               | Escherichia coli                                 |
| 23398  | 31311          | 29773        | TY-2482_chromosome | C1MF88                                                                | Protein kinase subdomain-containing protein                                         | Citrobacter sp. 30_2                             |
| 24509  | 32932          | 31298        | TY-2482_chromosome | A7MPV8                                                                | Putative uncharacterized protein                                                    | Enterobacter sakazakii (strain ATCC BAA-894)     |
| 28482  | 33972          | 32935        | TY-2482_chromosome | Q19NM8                                                                | TerY3                                                                               | Escherichia coli O1:K1 / APEC                    |
| 26172  | 34698          | 34060        | TY-2482_chromosome | Q19NM7                                                                | TerY2                                                                               | Escherichia coli O1:K1 / APEC                    |
| 5410   | 35333          | 34698        | TY-2482_chromosome | P75012                                                                | Tellurium resistance protein TerX                                                   | Serratia marcescens                              |
| 25427  | 36075          | 35359        | TY-2482_chromosome | Q19NM5                                                                | TerY1                                                                               | Escherichia coli O1:K1 / APEC                    |
| 5409   | 36925          | 36461        | TY-2482_chromosome | P75010                                                                | Tellurium resistance protein terW                                                   | Serratia marcescens                              |
| 111940 | 38151          | 36946        | TY-2482_chromosome | C6UQE2                                                                | Predicted protein                                                                   | Escherichia coli O157:H7 (strain TW14359 / EHEC) |
| 90392  | 40233          | 38165        | TY-2482_chromosome | C6UQE3                                                                | Predicted protein                                                                   | Escherichia coli O157:H7 (strain TW14359 / EHEC) |
| 112025 | 40972          | 40202        | TY-2482_chromosome | C6UQE4                                                                | Predicted protein                                                                   | Escherichia coli O157:H7 (strain TW14359 / EHEC) |
| 115524 | 42107          | 40968        | TY-2482_chromosome | C6UQE5                                                                | Predicted protein                                                                   | Escherichia coli O157:H7 (strain TW14359 / EHEC) |
| 63751  | 43184          | 42120        | TY-2482_chromosome | C8UMS5                                                                | Putative uncharacterized protein                                                    | Escherichia coli O111:H- (strain 11128 / EHEC)   |
| 103700 | 43498          | 44076        | TY-2482_chromosome | C8TNH3                                                                | Putative tellurium resistance protein TerZ                                          | Escherichia coli O26:H11 (strain 11368 / EHEC)   |
| 107291 | 44079          | 45233        | TY-2482_chromosome | C8TX27                                                                | Putative tellurium resistance protein TerA                                          | Escherichia coli O103:H2 (strain 12009 / EHEC)   |
| 111194 | 45259          | 45711        | TY-2482_chromosome | C8TX26                                                                | Putative tellurium resistance protein TerB                                          | Escherichia coli O103:H2 (strain 12009 / EHEC)   |
| 100117 | 45737          | 46774        | TY-2482_chromosome | C8TX25                                                                | Putative tellurium resistance protein TerC                                          | Escherichia coli O103:H2 (strain 12009 / EHEC)   |
| 29304  | 47268          | 48045        | TY-2482_chromosome | Q19NL2                                                                | TerE                                                                                | Escherichia coli O1:K1 / APEC                    |
| 107266 | 48479          | 49717        | TY-2482_chromosome | C8TX21                                                                | Putative tellurium resistance protein TerF                                          | Escherichia coli O103:H2 (strain 12009 / EHEC)   |
| 85733  | 49878          | 50300        | TY-2482_chromosome | C8UCH9                                                                | Putative uncharacterized protein                                                    | Escherichia coli O111:H- (strain 11128 / EHEC)   |
| 104658 | 51007          | 51984        | TY-2482_chromosome | C8TV65                                                                | Putative uncharacterized protein                                                    | Escherichia coli O26:H11 (strain 11368 / EHEC)   |
| r104   | 52093          | 52296        | TY-2482_chromosome | ref NC_010473 :2160347-2160550 -  [gene=iscR] [locus_tag=ECDH10B_2145 |                                                                                     |                                                  |
| 58183  | 52317          | 53099        | TY-2482_chromosome | C8TPC9                                                                | Adhesin AIDA-I                                                                      | Escherichia coli O26:H11 (strain 11368 / EHEC)   |
| 102145 | 53074          | 54345        | TY-2482_chromosome | B7LG82                                                                | Antigen 43 (Ag43) phase-variable biofilm formation autotransporter; CP4-44 prophage | Escherichia coli (strain 55989 / EAEC)           |
| 107744 | 54456          | 56852        | TY-2482_chromosome | C6UQI7                                                                | Putative uncharacterized protein                                                    | Escherichia coli O157:H7 (strain TW14359 / EHEC) |
| 78788  | 56852          | 57754        | TY-2482_chromosome | C6UZH6                                                                | Putative uncharacterized protein                                                    | Escherichia coli O157:H7 (strain TW14359 / EHEC) |
| 104636 | 57754          | 58821        | TY-2482_chromosome | C6UZH7                                                                | Putative uncharacterized protein                                                    | Escherichia coli O157:H7 (strain TW14359 / EHEC) |
| 90293  | 58850          | 59638        | TY-2482_chromosome | B7L946                                                                | Putative uncharacterized protein                                                    | Escherichia coli (strain 55989 / EAEC)           |
| 61054  | 59657          | 60064        | TY-2482_chromosome | C8TX14                                                                | Putative uncharacterized protein                                                    | Escherichia coli O103:H2 (strain 12009 / EHEC)   |
| 71668  | 60288          | 61106        | TY-2482_chromosome | C8TX13                                                                | Putative uncharacterized protein                                                    | Escherichia coli O103:H2 (strain 12009 / EHEC)   |
| 20594  | 60297          | 60067        | TY-2482_chromosome | D8EDM2                                                                | Conserved domain protein                                                            | Escherichia coli MS 119-7                        |

|        |        |                           |                                                                              |                                                                                                                           |                                                  |
|--------|--------|---------------------------|------------------------------------------------------------------------------|---------------------------------------------------------------------------------------------------------------------------|--------------------------------------------------|
| 26739  | 61278  | 61231 TY-2482_chromosome  | Q1RA72                                                                       | Putative uncharacterized protein                                                                                          | Escherichia coli (strain UT189 / UPEC)           |
| 47869  | 62401  | 61445 TY-2482_chromosome  | Q5K5L6                                                                       | Putative uncharacterized protein                                                                                          | Escherichia coli                                 |
| 22614  | 63009  | 63588 TY-2482_chromosome  | E9TQB2                                                                       | Conserved domain protein (Fragment)                                                                                       | Escherichia coli MS 60-1                         |
| 22334  | 63591  | 64076 TY-2482_chromosome  | Q9X5P0                                                                       | Putative uncharacterized protein                                                                                          | Escherichia coli                                 |
| 107224 | 64373  | 65212 TY-2482_chromosome  | C8TNM7                                                                       | Putative uncharacterized protein                                                                                          | Escherichia coli O26:H11 (strain 11368 / EHEC)   |
| r204   | 65452  | 65365 TY-2482_chromosome  | ref NC_010473 :1152233-1152320 Ser tRNA  [gene=serX] [locus_tag=ECDH10B_1104 |                                                                                                                           |                                                  |
| 31105  | 65686  | 66621 TY-2482_chromosome  | B7LFE3                                                                       | Glyoxylate/hydroxyypyruvate reductase A (EC 1.1.1.79) (EC 1.1.1.81) (2-ketoacid reductase)                                | Escherichia coli (strain 55989 / EAEC)           |
| 34795  | 66679  | 67413 TY-2482_chromosome  | B7LFE4                                                                       | Putative hydrolase ycdX (EC 3.1.-.-)                                                                                      | Escherichia coli (strain 55989 / EAEC)           |
| 73766  | 67440  | 67991 TY-2482_chromosome  | B7LFE5                                                                       | Putative uncharacterized protein ycdY                                                                                     | Escherichia coli (strain 55989 / EAEC)           |
| 90422  | 68048  | 68584 TY-2482_chromosome  | D3H139                                                                       | Putative membrane protein                                                                                                 | Escherichia coli O44:H18 (strain 042 / EAEC)     |
| 90449  | 69484  | 68654 TY-2482_chromosome  | B7LFE7                                                                       | Putative outer membrane lipoprotein involved in curli production assembly/transport                                       | Escherichia coli (strain 55989 / EAEC)           |
| 99196  | 69927  | 69514 TY-2482_chromosome  | B7LFE8                                                                       | Putative transport/assembly protein for curli synthesis                                                                   | Escherichia coli (strain 55989 / EAEC)           |
| 59174  | 70341  | 69955 TY-2482_chromosome  | B7LFE9                                                                       | Putative transport/assembly protein for curli synthesis                                                                   | Escherichia coli (strain 55989 / EAEC)           |
| 87830  | 70996  | 70349 TY-2482_chromosome  | B7LFF0                                                                       | DNA-binding transcriptional activator in two-component regulatory system                                                  | Escherichia coli (strain 55989 / EAEC)           |
| 116158 | 71656  | 71411 TY-2482_chromosome  | C6UQK8                                                                       | Putative uncharacterized protein                                                                                          | Escherichia coli O157:H7 (strain TW14359 / EHEC) |
| 14106  | 71723  | 72246 TY-2482_chromosome  | E9WD94                                                                       | Curli associated protein                                                                                                  | Escherichia coli E1520                           |
| 79086  | 72246  | 72698 TY-2482_chromosome  | B7LFF2                                                                       | Cryptic curli major subunit                                                                                               | Escherichia coli (strain 55989 / EAEC)           |
| 72357  | 72760  | 73089 TY-2482_chromosome  | B7LFF3                                                                       | Putative curli production protein                                                                                         | Escherichia coli (strain 55989 / EAEC)           |
| 93587  | 73213  | 73520 TY-2482_chromosome  | C8U5K0                                                                       | Conserved predicted protein                                                                                               | Escherichia coli O103:H2 (strain 12009 / EHEC)   |
| 99197  | 73618  | 74148 TY-2482_chromosome  | B7LFF5                                                                       | Putative uncharacterized protein ymdB                                                                                     | Escherichia coli (strain 55989 / EAEC)           |
| 93780  | 74153  | 75571 TY-2482_chromosome  | B7LFF6                                                                       | Putative hydrolase                                                                                                        | Escherichia coli (strain 55989 / EAEC)           |
| 32826  | 76739  | 75585 TY-2482_chromosome  | B7LFF7                                                                       | Glucans biosynthesis protein C (EC 2.1.-.-)                                                                               | Escherichia coli (strain 55989 / EAEC)           |
| 32831  | 77133  | 78665 TY-2482_chromosome  | B7LFG0                                                                       | Glucans biosynthesis protein G                                                                                            | Escherichia coli (strain 55989 / EAEC)           |
| 105396 | 78661  | 81201 TY-2482_chromosome  | B7LFG1                                                                       | Glucan biosynthesis: glycosyl transferase                                                                                 | Escherichia coli (strain 55989 / EAEC)           |
| 26066  | 81213  | 81435 TY-2482_chromosome  | Q0TJ23                                                                       | Putative uncharacterized protein                                                                                          | Escherichia coli O6:K15:H31 (strain 536 / UPEC)  |
| 93626  | 81377  | 81601 TY-2482_chromosome  | B7LFG2                                                                       | Putative lipoprotein                                                                                                      | Escherichia coli (strain 55989 / EAEC)           |
| 81073  | 81979  | 81608 TY-2482_chromosome  | B7LFG3                                                                       | Putative uncharacterized protein msyB                                                                                     | Escherichia coli (strain 55989 / EAEC)           |
| 32216  | 83288  | 82065 TY-2482_chromosome  | B7LFG4                                                                       | Multidrug resistance protein mdtG                                                                                         | Escherichia coli (strain 55989 / EAEC)           |
| 113461 | 84380  | 83463 TY-2482_chromosome  | B7LFG5                                                                       | Lauryl-acyl carrier protein (ACP)-dependent acyltransferase (EC 2.3.1.-)                                                  | Escherichia coli (strain 55989 / EAEC)           |
| 34798  | 84605  | 85654 TY-2482_chromosome  | B7LFG6                                                                       | UPF0176 protein yceA                                                                                                      | Escherichia coli (strain 55989 / EAEC)           |
| 99135  | 86274  | 85702 TY-2482_chromosome  | B7LGA6                                                                       | Protein yceI                                                                                                              | Escherichia coli (strain 55989 / EAEC)           |
| 59105  | 86844  | 86281 TY-2482_chromosome  | B7LFF2                                                                       | Putative cytochrome b561                                                                                                  | Escherichia coli (strain 55989 / EAEC)           |
| 32518  | 88384  | 87269 TY-2482_chromosome  | B7LFF3                                                                       | N-methyl-L-tryptophan oxidase (MTOX) (EC 1.5.3.-)                                                                         | Escherichia coli (strain 55989 / EAEC)           |
| 73549  | 88756  | 88502 TY-2482_chromosome  | B5VVT0                                                                       | Putative uncharacterized protein                                                                                          | Escherichia coli O157:H7 (strain EC4115 / EHEC)  |
| 87110  | 89420  | 89046 TY-2482_chromosome  | B7LFF5                                                                       | DNA damage-inducible protein I                                                                                            | Escherichia coli (strain 55989 / EAEC)           |
| 33197  | 90408  | 89365 TY-2482_chromosome  | B7LFF6                                                                       | Dihydroorotase (DHOase) (EC 3.5.2.3)                                                                                      | Escherichia coli (strain 55989 / EAEC)           |
| 77398  | 91074  | 90517 TY-2482_chromosome  | B7LFF7                                                                       | Putative lipoprotein                                                                                                      | Escherichia coli (strain 55989 / EAEC)           |
| 77399  | 91855  | 91211 TY-2482_chromosome  | B7LFF8                                                                       | Glutaredoxin 2 (Grx2)                                                                                                     | Escherichia coli (strain 55989 / EAEC)           |
| 32218  | 93127  | 91922 TY-2482_chromosome  | B7LFF9                                                                       | Multidrug resistance protein mdhH                                                                                         | Escherichia coli (strain 55989 / EAEC)           |
| 107800 | 93363  | 93944 TY-2482_chromosome  | B7LGG0                                                                       | Ribosomal-protein-S5-alanine N-acetyltransferase (EC 2.3.1.128)                                                           | Escherichia coli (strain 55989 / EAEC)           |
| 75386  | 94607  | 95527 TY-2482_chromosome  | B7LGG2                                                                       | Putative oxidoreductase with NAD(P)-binding Rossmann-fold domain                                                          | Escherichia coli (strain 55989 / EAEC)           |
| 81009  | 95640  | 97172 TY-2482_chromosome  | B7LGG3                                                                       | Putative uncharacterized protein mvnH                                                                                     | Escherichia coli (strain 55989 / EAEC)           |
| 81010  | 97631  | 97218 TY-2482_chromosome  | B7LGG4                                                                       | Export chaperone for FlgK and FlgL                                                                                        | Escherichia coli (strain 55989 / EAEC)           |
| 101279 | 97929  | 97639 TY-2482_chromosome  | B7LGG5                                                                       | Anti-sigma factor for FlhA (Sigma 28)                                                                                     | Escherichia coli (strain 55989 / EAEC)           |
| 72531  | 98664  | 98008 TY-2482_chromosome  | B7LGG6                                                                       | Assembly protein for flagellar basal-body periplasmic P ring                                                              | Escherichia coli (strain 55989 / EAEC)           |
| 64904  | 98819  | 99232 TY-2482_chromosome  | B7LGG7                                                                       | Flagellar component of cell-proximal portion of basal-body roc                                                            | Escherichia coli (strain 55989 / EAEC)           |
| 95572  | 99239  | 99640 TY-2482_chromosome  | B7LGG8                                                                       | Flagellar component of cell-proximal portion of basal-body roc                                                            | Escherichia coli (strain 55989 / EAEC)           |
| 69997  | 99655  | 100347 TY-2482_chromosome | B7LGG9                                                                       | Flagellar hook assembly protein                                                                                           | Escherichia coli (strain 55989 / EAEC)           |
| 88386  | 100375 | 101577 TY-2482_chromosome | B7LGG10                                                                      | Flagellar hook protein                                                                                                    | Escherichia coli (strain 55989 / EAEC)           |
| 73713  | 101600 | 102352 TY-2482_chromosome | B7LGG11                                                                      | Flagellar component of cell-proximal portion of basal-body roc                                                            | Escherichia coli (strain 55989 / EAEC)           |
| 69395  | 102527 | 103306 TY-2482_chromosome | B7LGG12                                                                      | Flagellar component of cell-distal portion of basal-body roc                                                              | Escherichia coli (strain 55989 / EAEC)           |
| 30971  | 103362 | 104057 TY-2482_chromosome | B7LGG13                                                                      | Flagellar L-ring protein (Basal body L-ring protein)                                                                      | Escherichia coli (strain 55989 / EAEC)           |
| 30976  | 104072 | 105166 TY-2482_chromosome | B7LGG14                                                                      | Flagellar P-ring protein (Basal body P-ring protein)                                                                      | Escherichia coli (strain 55989 / EAEC)           |
| 88387  | 105169 | 106107 TY-2482_chromosome | B7LGG15                                                                      | Muramidase                                                                                                                | Escherichia coli (strain 55989 / EAEC)           |
| 69394  | 106176 | 107816 TY-2482_chromosome | B7LGG16                                                                      | Flagellar hook-filament junction protein 1                                                                                | Escherichia coli (strain 55989 / EAEC)           |
| 59106  | 107831 | 108781 TY-2482_chromosome | B7LGG17                                                                      | Flagellar hook-filament junction protein                                                                                  | Escherichia coli (strain 55989 / EAEC)           |
| 106502 | 112166 | 108984 TY-2482_chromosome | B7LGG18                                                                      | Fused ribonucleaseE: endoribonuclease ; RNA-binding protein ;RNA degradosome binding protein (EC 3.1.4.-)                 | Escherichia coli (strain 55989 / EAEC)           |
| 114703 | 112301 | 112618 TY-2482_chromosome | C8TFF5                                                                       | Conserved predicted protein                                                                                               | Escherichia coli O26:H11 (strain 11368 / EHEC)   |
| 109593 | 112739 | 113695 TY-2482_chromosome | B7LGG19                                                                      | Pseudouridine synthase (EC 5.4.99.-)                                                                                      | Escherichia coli (strain 55989 / EAEC)           |
| r110   | 114388 | 114556 TY-2482_chromosome | ref NC_010473 :1201257-1201425 -  [gene=sraB] [locus_tag=ECDH10B_1159        |                                                                                                                           |                                                  |
| 61974  | 114433 | 113813 TY-2482_chromosome | B5YVV6                                                                       | Maf-like protein yceF 1                                                                                                   | Escherichia coli O157:H7 (strain EC4115 / EHEC)  |
| 82702  | 114593 | 115111 TY-2482_chromosome | B7LGG21                                                                      | Putative uncharacterized protein yceD                                                                                     | Escherichia coli (strain 55989 / EAEC)           |
| 33014  | 115420 | 116487 TY-2482_chromosome | B7LGG23                                                                      | Phosphate acyltransferase (EC 2.3.1.n2) (Acyl-ACP phosphotransacylase) (Acyl-[acyl-carrier-protein]--phosphate acylt      | Escherichia coli (strain 55989 / EAEC)           |
| 80265  | 116558 | 117508 TY-2482_chromosome | B7LGG24                                                                      | 3-oxoacyl-[acyl-carrier-protein] synthase 3 (EC 2.3.1.180) (3-oxoacyl-[acyl-carrier-protein] synthase III) (Beta-ketoacyl | Escherichia coli (strain 55989 / EAEC)           |

|        |        |                           |        |                                                                                                            |                                              |
|--------|--------|---------------------------|--------|------------------------------------------------------------------------------------------------------------|----------------------------------------------|
| 66385  | 117527 | 118453 TY-2482_chromosome | B7LG25 | Malonyl-CoA-[acyl-carrier-protein] transacylase (EC 2.3.1.39)                                              | Escherichia coli (strain 55989 / EAEC)       |
| 94751  | 118469 | 119200 TY-2482_chromosome | B7LG26 | 3-oxoacyl-[acyl-carrier-protein] reductase (EC 1.1.1.100)                                                  | Escherichia coli (strain 55989 / EAEC)       |
| 25155  | 119735 | 119363 TY-2482_chromosome | Q1RD63 | Putative uncharacterized protein                                                                           | Escherichia coli (strain UTI89 / UPEC)       |
| 99022  | 119738 | 120976 TY-2482_chromosome | B7LG28 | 3-oxoacyl-[acyl-carrier-protein] synthase 2 (EC 2.3.1.179)                                                 | Escherichia coli (strain 55989 / EAEC)       |
| 113509 | 121099 | 121905 TY-2482_chromosome | B7LG29 | 4-amino-4-deoxychorismate lyase component of para-aminobenzoate synthase multienzyme complex (EC 4.1.3.38) | Escherichia coli (strain 55989 / EAEC)       |
| 97947  | 121911 | 122930 TY-2482_chromosome | B7LG30 | Putative conserved membrane associated protein                                                             | Escherichia coli (strain 55989 / EAEC)       |
| 31798  | 122923 | 123561 TY-2482_chromosome | B7LG31 | Thymidylate kinase (EC 2.7.4.9) (dTMP kinase)                                                              | Escherichia coli (strain 55989 / EAEC)       |
| 65361  | 123561 | 124562 TY-2482_chromosome | B7LG32 | DNA polymerase III, delta prime subunit (EC 2.7.7.7)                                                       | Escherichia coli (strain 55989 / EAEC)       |
| 83402  | 124576 | 125370 TY-2482_chromosome | B7LG33 | Putative metallodependent hydrolase                                                                        | Escherichia coli (strain 55989 / EAEC)       |
| 95573  | 125668 | 127098 TY-2482_chromosome | B7LG34 | Fused glucose-specific PTS enzymes: IIBcomponent ; IIC component (EC 2.7.1.69)                             | Escherichia coli (strain 55989 / EAEC)       |
| 69924  | 129350 | 127164 TY-2482_chromosome | B7LG35 | Ferric-rhodotorulic acid outer membrane transporter                                                        | Escherichia coli (strain 55989 / EAEC)       |
| 114028 | 129684 | 130040 TY-2482_chromosome | B7LG36 | Purine nucleoside phosphoramidase                                                                          | Escherichia coli (strain 55989 / EAEC)       |
| 81011  | 130046 | 130420 TY-2482_chromosome | B7LG37 | Putative uncharacterized protein ycfL                                                                      | Escherichia coli (strain 55989 / EAEC)       |
| 72718  | 130437 | 131075 TY-2482_chromosome | B7LG38 | Putative outer membrane lipoprotein                                                                        | Escherichia coli (strain 55989 / EAEC)       |
| 106367 | 131059 | 131880 TY-2482_chromosome | B7LG39 | Thiamin kinase (EC 2.7.1.89)                                                                               | Escherichia coli (strain 55989 / EAEC)       |
| 32610  | 131894 | 132916 TY-2482_chromosome | B7LG40 | Beta-hexosaminidase (EC 3.2.1.52) (Beta-N-acetylhexosaminidase) (N-acetyl-beta-glucosaminidase)            | Escherichia coli (strain 55989 / EAEC)       |
| 34808  | 132942 | 133481 TY-2482_chromosome | B7LG41 | UPF0227 protein ycfP                                                                                       | Escherichia coli (strain 55989 / EAEC)       |
| 95578  | 133892 | 135193 TY-2482_chromosome | B7LG42 | Respiratory NADH dehydrogenase 2/cupric reductase (EC 1.16.1.-) (EC 1.6.99.3)                              | Escherichia coli (strain 55989 / EAEC)       |
| 81012  | 135406 | 135942 TY-2482_chromosome | B7LG43 | Putative uncharacterized protein ycfJ                                                                      | Escherichia coli (strain 55989 / EAEC)       |
| 85660  | 136717 | 136010 TY-2482_chromosome | D3H157 | TetR-family transcriptional regulator                                                                      | Escherichia coli O44:H18 (strain 042 / EAEC) |
| 64299  | 136880 | 137134 TY-2482_chromosome | B7LG45 | Putative uncharacterized protein ycfR                                                                      | Escherichia coli (strain 55989 / EAEC)       |
| 77400  | 138182 | 137223 TY-2482_chromosome | B7LG47 | Putative uncharacterized protein ycfS                                                                      | Escherichia coli (strain 55989 / EAEC)       |
| 59107  | 141772 | 138329 TY-2482_chromosome | B7LG48 | Transcription-repair coupling factor                                                                       | Escherichia coli (strain 55989 / EAEC)       |
| 104280 | 142973 | 141903 TY-2482_chromosome | B7LG49 | Putative uncharacterized protein ycfT                                                                      | Escherichia coli (strain 55989 / EAEC)       |
| 73714  | 143235 | 144431 TY-2482_chromosome | B7LG50 | Outer membrane-specific lipoprotein transporter subunit ; membrane component of ABC superfamily            | Escherichia coli (strain 55989 / EAEC)       |
| 114029 | 144427 | 145125 TY-2482_chromosome | B7LG51 | Outer membrane-specific lipoprotein transporter subunit ; ATP-binding component of ABC superfamily         | Escherichia coli (strain 55989 / EAEC)       |
| 69145  | 145128 | 146369 TY-2482_chromosome | B7LG52 | Outer membrane-specific lipoprotein transporter subunit ; membrane component of ABC superfamily            | Escherichia coli (strain 55989 / EAEC)       |
| 32602  | 146401 | 147309 TY-2482_chromosome | B7LG53 | N-acetyl-D-glucosamine kinase (EC 2.7.1.59) (GlcNAc kinase)                                                | Escherichia coli (strain 55989 / EAEC)       |
| 75444  | 147328 | 148146 TY-2482_chromosome | B7LG54 | Deacetylase of acetyl-CoA synthetase, NAD-dependent                                                        | Escherichia coli (strain 55989 / EAEC)       |
| 15319  | 149534 | 148291 TY-2482_chromosome | D6HVG4 | Inner membrane protein ycfZ                                                                                | Escherichia coli B088                        |
| 86060  | 150638 | 149595 TY-2482_chromosome | B7LG57 | Polyamine transporter subunit ; periplasmic-binding component of ABC superfamily                           | Escherichia coli (strain 55989 / EAEC)       |
| 84582  | 151429 | 150638 TY-2482_chromosome | B7LG58 | Polyamine transporter subunit ; membrane component of ABC superfamily                                      | Escherichia coli (strain 55989 / EAEC)       |
| 75731  | 152283 | 151429 TY-2482_chromosome | D3H1U1 | Spermidine/putrescine ABC transporter, permease protein                                                    | Escherichia coli O44:H18 (strain 042 / EAEC) |
| 94667  | 153403 | 152270 TY-2482_chromosome | B7LG60 | Polyamine transporter subunit ; ATP-binding component of ABC superfamily                                   | Escherichia coli (strain 55989 / EAEC)       |
| 102073 | 153611 | 154879 TY-2482_chromosome | B7LW6  | Peptidase T                                                                                                | Escherichia coli (strain 55989 / EAEC)       |
| 68048  | 153633 | 153385 TY-2482_chromosome | B7LG61 | Putative uncharacterized protein                                                                           | Escherichia coli (strain 55989 / EAEC)       |
| 107801 | 156149 | 155031 TY-2482_chromosome | B7LG66 | Putative uncharacterized protein ycfD                                                                      | Escherichia coli (strain 55989 / EAEC)       |
| 75617  | 157685 | 156228 TY-2482_chromosome | B7LGQ7 | Sensory histidine kinase in two-component regulatory system with PhoP                                      | Escherichia coli (strain 55989 / EAEC)       |
| 115814 | 158356 | 157688 TY-2482_chromosome | B7LGQ8 | DNA-binding response regulator in two-component regulatory system with PhoQ                                | Escherichia coli (strain 55989 / EAEC)       |
| 109823 | 159894 | 158527 TY-2482_chromosome | B7LGQ9 | Adenylosuccinate lyase (EC 4.3.2.2)                                                                        | Escherichia coli (strain 55989 / EAEC)       |
| 100316 | 160545 | 159901 TY-2482_chromosome | D3H1U9 | High frequency lysogenization protein hflD                                                                 | Escherichia coli O44:H18 (strain 042 / EAEC) |
| 102082 | 161681 | 160578 TY-2482_chromosome | B7LGR1 | tRNA-specific 2-thiouridylyase mmaA (EC 2.8.1.-)                                                           | Escherichia coli (strain 55989 / EAEC)       |
| 80995  | 162196 | 161738 TY-2482_chromosome | B7LGR2 | Bifunctional thiamin pyrimidine pyrophosphate hydrolase and thiamin pyrophosphate hydrolase                | Escherichia coli (strain 55989 / EAEC)       |
| 80513  | 162859 | 162209 TY-2482_chromosome | B7LGR3 | Pseudouridine synthase (EC 5.4.99.-)                                                                       | Escherichia coli (strain 55989 / EAEC)       |
| 25697  | 164128 | 162950 TY-2482_chromosome | Q1RD17 | Putative uncharacterized protein                                                                           | Escherichia coli (strain UTI89 / UPEC)       |
| 2781   | 164707 | 164387 TY-2482_chromosome | B7LGR5 | Anti-adaptor protein iraM                                                                                  | Escherichia coli (strain 55989 / EAEC)       |
| 66280  | 165807 | 165406 TY-2482_chromosome | B7LGR6 | Putative uncharacterized protein ycgX                                                                      | Escherichia coli (strain 55989 / EAEC)       |
| 104387 | 166759 | 166031 TY-2482_chromosome | B7LGR7 | Putative DNA-binding transcriptional regulator                                                             | Escherichia coli (strain 55989 / EAEC)       |
| 59093  | 168175 | 166967 TY-2482_chromosome | B7LGR8 | Putative cyclic-di-GMP phosphodiesterase; blue-light sensing protein using FAD (BLUF)                      | Escherichia coli (strain 55989 / EAEC)       |
| 80996  | 168489 | 168722 TY-2482_chromosome | B7LGR9 | Putative uncharacterized protein ycgZ                                                                      | Escherichia coli (strain 55989 / EAEC)       |
| 71422  | 168768 | 169037 TY-2482_chromosome | B7LG50 | Putative uncharacterized protein ymgA                                                                      | Escherichia coli (strain 55989 / EAEC)       |
| 78959  | 169069 | 169332 TY-2482_chromosome | B7LGS1 | Putative uncharacterized protein ymgB                                                                      | Escherichia coli (strain 55989 / EAEC)       |
| 111774 | 169448 | 169693 TY-2482_chromosome | B7LG52 | Putative uncharacterized protein ymgC                                                                      | Escherichia coli (strain 55989 / EAEC)       |
| 111718 | 170028 | 171548 TY-2482_chromosome | B7LG53 | Putative uncharacterized protein ycgG                                                                      | Escherichia coli (strain 55989 / EAEC)       |
| 111372 | 171647 | 171898 TY-2482_chromosome | D3H1W3 | Putative membrane protein                                                                                  | Escherichia coli O44:H18 (strain 042 / EAEC) |
| 99169  | 172627 | 174945 TY-2482_chromosome | B7LGS8 | Putative Outer membrane autotransporter barrel, putative pectin lyase fold                                 | Escherichia coli (strain 55989 / EAEC)       |
| 99173  | 175334 | 175008 TY-2482_chromosome | B7LGS9 | Putative uncharacterized protein ymgD                                                                      | Escherichia coli (strain 55989 / EAEC)       |
| 35026  | 175688 | 175347 TY-2482_chromosome | B7LGT0 | UPF0757 protein ymgG                                                                                       | Escherichia coli (strain 55989 / EAEC)       |
| 70057  | 176165 | 176605 TY-2482_chromosome | B7LGT1 | Putative uncharacterized protein                                                                           | Escherichia coli (strain 55989 / EAEC)       |
| 32409  | 177246 | 176983 TY-2482_chromosome | B7LGT2 | Cell division topological specificity factor                                                               | Escherichia coli (strain 55989 / EAEC)       |
| 114073 | 178062 | 177253 TY-2482_chromosome | B7LGT3 | Membrane ATPase of the MinC-MinD-MinE system                                                               | Escherichia coli (strain 55989 / EAEC)       |
| 32405  | 178781 | 178089 TY-2482_chromosome | B7LGT4 | Probable septum site-determining protein minC                                                              | Escherichia coli (strain 55989 / EAEC)       |
| 9439   | 178921 | 179145 TY-2482_chromosome | D6J9E0 | Predicted protein                                                                                          | Escherichia coli B354                        |
| 106529 | 179301 | 179666 TY-2482_chromosome | B7LGT5 | Putative uncharacterized protein ycgJ                                                                      | Escherichia coli (strain 55989 / EAEC)       |

|        |        |                           |                                                                              |                                                                                                                     |                                                   |
|--------|--------|---------------------------|------------------------------------------------------------------------------|---------------------------------------------------------------------------------------------------------------------|---------------------------------------------------|
| 99174  | 180190 | 179792 TY-2482_chromosome | B7LGT6                                                                       | Putative uncharacterized protein ycgK                                                                               | Escherichia coli (strain 55989 / EAEC)            |
| 26609  | 180219 | 180417 TY-2482_chromosome | D3QQU1                                                                       | Putative uncharacterized protein                                                                                    | Escherichia coli O55:H7 (strain CB9615 / EPEC)    |
| 34811  | 180399 | 180722 TY-2482_chromosome | B7LGT7                                                                       | UPF0745 protein YcgL                                                                                                | Escherichia coli (strain 55989 / EAEC)            |
| 83168  | 180797 | 181453 TY-2482_chromosome | B7LGT8                                                                       | Putative isomerase/hydrolase (EC 3.-.-.-)                                                                           | Escherichia coli (strain 55989 / EAEC)            |
| 18861  | 181470 | 181991 TY-2482_chromosome | D8BP59                                                                       | Putative uncharacterized protein (Fragment)                                                                         | Escherichia coli MS 200-1                         |
| 75748  | 183255 | 182204 TY-2482_chromosome | B5YXK6                                                                       | Hemolysin E, chromosomal                                                                                            | Escherichia coli O157:H7 (strain EC4115 / EHEC)   |
| 88374  | 183484 | 183900 TY-2482_chromosome | B7LGU3                                                                       | DNA polymerase V, subunit D (EC 3.4.21.-)                                                                           | Escherichia coli (strain 55989 / EAEC)            |
| 61882  | 183903 | 185168 TY-2482_chromosome | B7LGU4                                                                       | DNA polymerase V, subunit C                                                                                         | Escherichia coli (strain 55989 / EAEC)            |
| 108639 | 185753 | 185220 TY-2482_chromosome | B5YXK9                                                                       | Disulfide bond formation protein DsbB                                                                               | Escherichia coli O157:H7 (strain EC4115 / EHEC)   |
| 32658  | 187434 | 185896 TY-2482_chromosome | B7LGU6                                                                       | Na(+)/H(+) antiporter nhaB (Sodium/proton antiporter nhaB)                                                          | Escherichia coli (strain 55989 / EAEC)            |
| 30899  | 187656 | 188372 TY-2482_chromosome | B7LGU7                                                                       | Fatty acid metabolism regulator protein                                                                             | Escherichia coli (strain 55989 / EAEC)            |
| 104971 | 189959 | 188430 TY-2482_chromosome | B7LGU8                                                                       | Putative uncharacterized protein ycgB                                                                               | Escherichia coli (strain 55989 / EAEC)            |
| 30530  | 190289 | 191584 TY-2482_chromosome | B7LGU9                                                                       | D-amino acid dehydrogenase small subunit (EC 1.4.99.1)                                                              | Escherichia coli (strain 55989 / EAEC)            |
| 91936  | 191597 | 192664 TY-2482_chromosome | B7LGV0                                                                       | Alanine racemase 1 (EC 5.1.1.1)                                                                                     | Escherichia coli (strain 55989 / EAEC)            |
| 30441  | 194789 | 193056 TY-2482_chromosome | B7LGV1                                                                       | Cell volume regulation protein A                                                                                    | Escherichia coli (strain 55989 / EAEC)            |
| 10220  | 195784 | 196506 TY-2482_chromosome | A1YN12                                                                       | Membrane-bound lytic murein transglycosylase E                                                                      | Escherichia coli                                  |
| 90220  | 195798 | 194887 TY-2482_chromosome | B7LGV2                                                                       | L,D-carboxypeptidase A (EC 3.4.17.13)                                                                               | Escherichia coli (strain 55989 / EAEC)            |
| 73747  | 197245 | 196514 TY-2482_chromosome | B7LGV4                                                                       | Flagellar brake protein YcgR (Cyclic di-GMP binding protein YcgR)                                                   | Escherichia coli (strain 55989 / EAEC)            |
| 24501  | 197769 | 197503 TY-2482_chromosome | A7ZKW7                                                                       | Putative uncharacterized protein                                                                                    | Escherichia coli O139:H28 (strain E24377A / ETEC) |
| 59153  | 197878 | 198315 TY-2482_chromosome | B7LGV6                                                                       | Putative uncharacterized protein ycgY                                                                               | Escherichia coli (strain 55989 / EAEC)            |
| 34312  | 200094 | 198400 TY-2482_chromosome | B7LGV7                                                                       | Periplasmic trehalase (EC 3.2.1.28) (Alpha, alpha-trehalase) (Alpha, alpha-trehalose glucosylhydrolase)             | Escherichia coli (strain 55989 / EAEC)            |
| 80318  | 201832 | 200417 TY-2482_chromosome | B7LGV8                                                                       | Fused dihydroxyacetone-specific PTS enzymes: HPr component ; EI component                                           | Escherichia coli (strain 55989 / EAEC)            |
| 114074 | 202475 | 201846 TY-2482_chromosome | B7LGV9                                                                       | Dihydroxyacetone kinase, C-terminal domain                                                                          | Escherichia coli (strain 55989 / EAEC)            |
| 102913 | 203556 | 202489 TY-2482_chromosome | B7LGV0                                                                       | Dihydroxyacetone kinase, N-terminal domain                                                                          | Escherichia coli (strain 55989 / EAEC)            |
| 91136  | 203784 | 205700 TY-2482_chromosome | B7LGW1                                                                       | DNA-binding transcriptional regulator, dihydroxyacetone metabolism                                                  | Escherichia coli (strain 55989 / EAEC)            |
| 113399 | 208670 | 205806 TY-2482_chromosome | B7LGW2                                                                       | Putative adhesin; putative autotransporter                                                                          | Escherichia coli (strain 55989 / EAEC)            |
| 110420 | 210530 | 209442 TY-2482_chromosome | B7LGW3                                                                       | Putative GTP-binding protein                                                                                        | Escherichia coli (strain 55989 / EAEC)            |
| 33134  | 211231 | 210650 TY-2482_chromosome | B7LGW4                                                                       | Peptidyl-tRNA hydrolase (PTH) (EC 3.1.1.29)                                                                         | Escherichia coli (strain 55989 / EAEC)            |
| 95613  | 211509 | 211784 TY-2482_chromosome | B7LGW5                                                                       | Putative uncharacterized protein ychH                                                                               | Escherichia coli (strain 55989 / EAEC)            |
| 91215  | 213521 | 211845 TY-2482_chromosome | B7LGW7                                                                       | Putative transporter                                                                                                | Escherichia coli (strain 55989 / EAEC)            |
| 72730  | 214593 | 213649 TY-2482_chromosome | B7LGW8                                                                       | Ribose-phosphate pyrophosphokinase (RPPK) (EC 2.7.6.1) (Phosphoribosyl pyrophosphate synthase)                      | Escherichia coli (strain 55989 / EAEC)            |
| 31691  | 215595 | 214747 TY-2482_chromosome | B7LGW9                                                                       | 4-diphosphocytidyl-2-C-methyl-D-erythritol kinase (CMK) (EC 2.7.1.148) (4-(cytidine-5'-diphospho)-2-C-methyl-D-eryt | Escherichia coli (strain 55989 / EAEC)            |
| 31920  | 216218 | 215598 TY-2482_chromosome | B7LGX0                                                                       | Outer-membrane lipoprotein loIB                                                                                     | Escherichia coli (strain 55989 / EAEC)            |
| 31340  | 216432 | 217685 TY-2482_chromosome | B7LGX1                                                                       | Glutamyl-tRNA reductase (GluTR) (EC 1.2.1.70)                                                                       | Escherichia coli (strain 55989 / EAEC)            |
| 33317  | 217730 | 218809 TY-2482_chromosome | B7LGX2                                                                       | Peptide chain release factor 1 (RF-1)                                                                               | Escherichia coli (strain 55989 / EAEC)            |
| 58397  | 218812 | 219642 TY-2482_chromosome | B7LGX3                                                                       | N5-glutamine methyltransferase, modifies release factors RF-1 and RF-2 (EC 2.1.1.-)                                 | Escherichia coli (strain 55989 / EAEC)            |
| 81050  | 219642 | 220031 TY-2482_chromosome | B7LGX4                                                                       | Putative membrane protein; putative component of transcriptional regulator                                          | Escherichia coli (strain 55989 / EAEC)            |
| 84610  | 220038 | 220844 TY-2482_chromosome | B7LGX5                                                                       | Putative transcriptional regulator                                                                                  | Escherichia coli (strain 55989 / EAEC)            |
| 26647  | 221748 | 222008 TY-2482_chromosome | Q1RCM2                                                                       | Putative uncharacterized protein                                                                                    | Escherichia coli (strain UT189 / UPEC)            |
| 28627  | 221806 | 220847 TY-2482_chromosome | O8FHZ9                                                                       | Putative uncharacterized protein                                                                                    | Escherichia coli O6                               |
| r512   | 222041 | 222107 TY-2482_chromosome | ref NC_010473 :1308787-1308853 -  [gene=rdIA] [locus_tag=ECDH10B_1270]       |                                                                                                                     |                                                   |
| 12916  | 222307 | 222543 TY-2482_chromosome | C1NCG3                                                                       | Putative uncharacterized protein                                                                                    | Escherichia sp. 1_1_43                            |
| r513   | 222576 | 222642 TY-2482_chromosome | ref NC_010473 :1308787-1308853 -  [gene=rdIA] [locus_tag=ECDH10B_1270]       |                                                                                                                     |                                                   |
| 12917  | 222842 | 223078 TY-2482_chromosome | C1NCG3                                                                       | Putative uncharacterized protein                                                                                    | Escherichia sp. 1_1_43                            |
| r514   | 223116 | 223178 TY-2482_chromosome | ref NC_010473 :1308787-1308853 -  [gene=rdIA] [locus_tag=ECDH10B_1270]       |                                                                                                                     |                                                   |
| 12915  | 223378 | 223614 TY-2482_chromosome | C1NCG3                                                                       | Putative uncharacterized protein                                                                                    | Escherichia sp. 1_1_43                            |
| r508   | 223647 | 223714 TY-2482_chromosome | ref NC_010473 :1309857-1309924 -  [gene=rdIC] [locus_tag=ECDH10B_1274]       |                                                                                                                     |                                                   |
| 91006  | 225104 | 224007 TY-2482_chromosome | B7LGX9                                                                       | Calcium/sodium:proton antiporter                                                                                    | Escherichia coli (strain 55989 / EAEC)            |
| 29313  | 225667 | 225371 TY-2482_chromosome | A1AAE4                                                                       | Putative uncharacterized protein                                                                                    | Escherichia coli O1:K1 / APEC                     |
| 102952 | 225741 | 226454 TY-2482_chromosome | B7LHL5                                                                       | Regulatory protein for cation transport                                                                             | Escherichia coli (strain 55989 / EAEC)            |
| 95616  | 226854 | 226504 TY-2482_chromosome | B7LHG5                                                                       | Putative uncharacterized protein ychN                                                                               | Escherichia coli (strain 55989 / EAEC)            |
| 90079  | 227180 | 228430 TY-2482_chromosome | B7LHG6                                                                       | Putative adhesin/invasin                                                                                            | Escherichia coli (strain 55989 / EAEC)            |
| 99038  | 230873 | 229080 TY-2482_chromosome | B7LHG8                                                                       | Sensory histidine kinase in two-component regulatory system with NarL                                               | Escherichia coli (strain 55989 / EAEC)            |
| 68095  | 230899 | 231114 TY-2482_chromosome | D3H2K9                                                                       | Putative uncharacterized protein                                                                                    | Escherichia coli O44:H18 (strain O42 / EAEC)      |
| 91942  | 231212 | 232600 TY-2482_chromosome | B7LHG9                                                                       | Nitrate/nitrite transporter                                                                                         | Escherichia coli (strain 55989 / EAEC)            |
| 80266  | 233119 | 236859 TY-2482_chromosome | B7LHH0                                                                       | Nitrate reductase 1, alpha subunit (EC 1.7.99.4)                                                                    | Escherichia coli (strain 55989 / EAEC)            |
| 58534  | 236859 | 238394 TY-2482_chromosome | B7LHH1                                                                       | Nitrate reductase 1, beta (Fe-S) subunit (EC 1.7.99.4)                                                              | Escherichia coli (strain 55989 / EAEC)            |
| 87625  | 238394 | 239101 TY-2482_chromosome | B7LHH2                                                                       | Molybdenum-cofactor-assembly chaperone subunit (Delta subunit) of nitrate reductase 1 (EC 1.7.99.4)                 | Escherichia coli (strain 55989 / EAEC)            |
| 61654  | 239104 | 239778 TY-2482_chromosome | B7LHH3                                                                       | Nitrate reductase 1, gamma (Cytochrome b(NR)) subunit (EC 1.7.99.4)                                                 | Escherichia coli (strain 55989 / EAEC)            |
| 27786  | 239961 | 240407 TY-2482_chromosome | B7LHH4                                                                       | Putative uncharacterized protein                                                                                    | Escherichia coli (strain 55989 / EAEC)            |
| r115   | 240135 | 239965 TY-2482_chromosome | ref NC_010473 :1326530-1326700 -  [gene=rttR] [locus_tag=ECDH10B_1288]       |                                                                                                                     |                                                   |
| r233   | 240227 | 240143 TY-2482_chromosome | ref NC_010473 :1327002-1327086 Tyr tRNA [gene=tyrT] [locus_tag=ECDH10B_1291] |                                                                                                                     |                                                   |
| r232   | 240346 | 240262 TY-2482_chromosome | ref NC_010473 :1327002-1327086 Tyr tRNA [gene=tyrT] [locus_tag=ECDH10B_1291] |                                                                                                                     |                                                   |
| 59010  | 241348 | 240509 TY-2482_chromosome | B7LHH5                                                                       | Formyltetrahydrofolate hydrolase (EC 3.5.1.10)                                                                      | Escherichia coli (strain 55989 / EAEC)            |

|        |        |                           |                                                                              |                                                                                                                |                                                   |
|--------|--------|---------------------------|------------------------------------------------------------------------------|----------------------------------------------------------------------------------------------------------------|---------------------------------------------------|
| 97279  | 241877 | 241401 TY-2482_chromosome | B5YYD8                                                                       | UPF0225 protein ychJ                                                                                           | Escherichia coli O157:H7 (strain EC4115 / EHEC)   |
| 65817  | 241930 | 242871 TY-2482_chromosome | B7LHH7                                                                       | Putative esterase of the alpha-beta hydrolase superfamily                                                      | Escherichia coli (strain 55989 / EAEC)            |
| 84620  | 242966 | 243976 TY-2482_chromosome | B7LHH8                                                                       | Response regulator of RpoS                                                                                     | Escherichia coli (strain 55989 / EAEC)            |
| 94887  | 244181 | 245086 TY-2482_chromosome | B7LHH9                                                                       | Glucose-1-phosphate uridylyltransferase (EC 2.7.7.9)                                                           | Escherichia coli (strain 55989 / EAEC)            |
| 66291  | 245646 | 245236 TY-2482_chromosome | B7LH10                                                                       | Global nucleic acid-binding transcriptional dual regulator H-N5                                                | Escherichia coli (strain 55989 / EAEC)            |
| 100845 | 246252 | 246866 TY-2482_chromosome | B7LH11                                                                       | Thymidine kinase (EC 2.7.1.21)                                                                                 | Escherichia coli (strain 55989 / EAEC)            |
| 6437   | 248051 | 247154 TY-2482_chromosome | P30192                                                                       | Putative uncharacterized protein ychG                                                                          | Escherichia coli (strain K12)                     |
| 88433  | 250850 | 248178 TY-2482_chromosome | B7LH15                                                                       | Fused acetaldehyde-CoA dehydrogenase ; iron-dependent alcohol dehydrogenase ; pyruvate-formate lyase deactivas | Escherichia coli (strain 55989 / EAEC)            |
| 94864  | 251327 | 251971 TY-2482_chromosome | B7LH16                                                                       | Putative uncharacterized protein ychE                                                                          | Escherichia coli (strain 55989 / EAEC)            |
| 13411  | 252446 | 252135 TY-2482_chromosome | D6J9L4                                                                       | Predicted protein                                                                                              | Escherichia coli B354                             |
| 94577  | 252712 | 254340 TY-2482_chromosome | B7LH18                                                                       | Oligopeptide transporter subunit ; periplasmic-binding component of ABC superfamily                            | Escherichia coli (strain 55989 / EAEC)            |
| 81054  | 254429 | 255346 TY-2482_chromosome | B7LH19                                                                       | Oligopeptide transporter subunit ; membrane component of ABC superfamily                                       | Escherichia coli (strain 55989 / EAEC)            |
| 99180  | 255364 | 256269 TY-2482_chromosome | B7LHJ0                                                                       | Oligopeptide transporter subunit ; membrane component of ABC superfamily                                       | Escherichia coli (strain 55989 / EAEC)            |
| 98161  | 256284 | 257294 TY-2482_chromosome | B7LHJ1                                                                       | Oligopeptide transporter subunit ; ATP-binding component of ABC superfamily                                    | Escherichia coli (strain 55989 / EAEC)            |
| 77437  | 257294 | 258295 TY-2482_chromosome | B7LHJ2                                                                       | Oligopeptide transporter subunit ; ATP-binding component of ABC superfamily                                    | Escherichia coli (strain 55989 / EAEC)            |
| 34820  | 258680 | 258354 TY-2482_chromosome | B7LHJ3                                                                       | UPF0263 protein yciU                                                                                           | Escherichia coli (strain 55989 / EAEC)            |
| 30345  | 260175 | 258718 TY-2482_chromosome | B7LHJ4                                                                       | Cardiolipin synthase (CL synthase) (EC 2.7.8.-)                                                                | Escherichia coli (strain 55989 / EAEC)            |
| 64738  | 260207 | 260488 TY-2482_chromosome | B7LHJ5                                                                       | Putative uncharacterized protein                                                                               | Escherichia coli (strain 55989 / EAEC)            |
| 101053 | 261799 | 260549 TY-2482_chromosome | B7LHJ6                                                                       | Voltage-gated potassium channel                                                                                | Escherichia coli (strain 55989 / EAEC)            |
| 82485  | 262401 | 262102 TY-2482_chromosome | D3H2N2                                                                       | Putative uncharacterized protein                                                                               | Escherichia coli O44:H18 (strain 042 / EAEC)      |
| 69930  | 262619 | 263335 TY-2482_chromosome | B7LHJ8                                                                       | Membrane spanning protein in TonB-ExbB-ExbD complex                                                            | Escherichia coli (strain 55989 / EAEC)            |
| 91944  | 263776 | 263381 TY-2482_chromosome | B7LHJ9                                                                       | Putative hydrolase                                                                                             | Escherichia coli (strain 55989 / EAEC)            |
| 31708  | 264420 | 263884 TY-2482_chromosome | B7LHK0                                                                       | Probable intracellular septation protein                                                                       | Escherichia coli (strain 55989 / EAEC)            |
| 34817  | 265193 | 264453 TY-2482_chromosome | B7LHK1                                                                       | UPF0259 membrane protein yciC                                                                                  | Escherichia coli (strain 55989 / EAEC)            |
| 72894  | 265550 | 266185 TY-2482_chromosome | B7LHK2                                                                       | Outer membrane protein W                                                                                       | Escherichia coli (strain 55989 / EAEC)            |
| 75445  | 267364 | 266237 TY-2482_chromosome | B7LHK3                                                                       | Phage integrase                                                                                                | Escherichia coli (strain 55989 / EAEC)            |
| 16442  | 267590 | 267268 TY-2482_chromosome | E8IYI4                                                                       | Excisionase                                                                                                    | Escherichia coli O55:H7 str. USDA 5905            |
| 66308  | 270126 | 267658 TY-2482_chromosome | B7LHK5                                                                       | Putative exonuclease from phage origin                                                                         | Escherichia coli (strain 55989 / EAEC)            |
| 10582  | 270189 | 270791 TY-2482_chromosome | E7JE17                                                                       | Putative uncharacterized protein                                                                               | Escherichia coli 1357                             |
| 20633  | 270824 | 271157 TY-2482_chromosome | E11YN5                                                                       | Conserved domain protein (Fragment)                                                                            | Escherichia coli MS 145-7                         |
| 24668  | 271090 | 271353 TY-2482_chromosome | B7LHK9                                                                       | Putative uncharacterized protein                                                                               | Escherichia coli (strain 55989 / EAEC)            |
| 28408  | 271695 | 271348 TY-2482_chromosome | B7LH10                                                                       | Putative uncharacterized protein                                                                               | Escherichia coli (strain 55989 / EAEC)            |
| 114614 | 271928 | 271698 TY-2482_chromosome | C8UCK2                                                                       | Putative uncharacterized protein                                                                               | Escherichia coli O111:H- (strain 11128 / EHEC)    |
| 93012  | 272563 | 272147 TY-2482_chromosome | C8TRS4                                                                       | Putative phage repressor protein CI                                                                            | Escherichia coli O26:H11 (strain 11368 / EHEC)    |
| 17356  | 272571 | 272894 TY-2482_chromosome | E2QMD4                                                                       | Regulatory protein                                                                                             | Escherichia coli                                  |
| 86005  | 272894 | 273316 TY-2482_chromosome | D3GYH8                                                                       | Putative prophage protein                                                                                      | Escherichia coli O44:H18 (strain 042 / EAEC)      |
| 96893  | 273327 | 274301 TY-2482_chromosome | D3GYH7                                                                       | Putative prophage replication protein                                                                          | Escherichia coli O44:H18 (strain 042 / EAEC)      |
| 17174  | 274339 | 274767 TY-2482_chromosome | E11YP5                                                                       | Putative uncharacterized protein                                                                               | Escherichia coli MS 145-7                         |
| 115645 | 274924 | 275607 TY-2482_chromosome | D3H4E4                                                                       | Putative prophage protein                                                                                      | Escherichia coli O44:H18 (strain 042 / EAEC)      |
| 50513  | 275791 | 276000 TY-2482_chromosome | E11YP7                                                                       | Hok/gef family protein                                                                                         | Escherichia coli MS 145-7                         |
| 66259  | 276445 | 277488 TY-2482_chromosome | B7L8R9                                                                       | Putative uncharacterized protein ydfU                                                                          | Escherichia coli (strain 55989 / EAEC)            |
| 9564   | 276518 | 276048 TY-2482_chromosome | E7IAU7                                                                       | Putative uncharacterized protein                                                                               | Escherichia coli LT-68                            |
| 60754  | 277504 | 277875 TY-2482_chromosome | D3H2S1                                                                       | Crossover junction endodeoxyribonuclease <i>rusA</i> (EC 3.1.22.4)                                             | Escherichia coli O44:H18 (strain 042 / EAEC)      |
| 95498  | 277875 | 278693 TY-2482_chromosome | B7LER7                                                                       | Putative antitermination protein Q of prophage                                                                 | Escherichia coli (strain 55989 / EAEC)            |
| 108586 | 278818 | 279117 TY-2482_chromosome | C8UNL5                                                                       | Conserved predicted protein                                                                                    | Escherichia coli O111:H- (strain 11128 / EHEC)    |
| 100726 | 279271 | 280317 TY-2482_chromosome | B7LER9                                                                       | Putative DNA adenine methyltransferase ( DNA methylase) from phage origin                                      | Escherichia coli (strain 55989 / EAEC)            |
| r352   | 280370 | 280445 TY-2482_chromosome | ref NC_010473 :2875549-2875624 ile tRNA  [gene=ileY] [locus_tag=ECDH10B_2820 |                                                                                                                |                                                   |
| 95579  | 280730 | 281080 TY-2482_chromosome | B7L8R4                                                                       | Putative uncharacterized protein                                                                               | Escherichia coli (strain 55989 / EAEC)            |
| 28582  | 281211 | 281522 TY-2482_chromosome | B7MV04                                                                       | Putative uncharacterized protein                                                                               | Escherichia coli O81 (strain ED1a)                |
| 2779   | 281866 | 281534 TY-2482_chromosome | B7UQ15                                                                       | Anti-adapter protein <i>iraM</i>                                                                               | Escherichia coli O127:H6 (strain E2348/69 / EPEC) |
| 68371  | 282127 | 283977 TY-2482_chromosome | B7LE50                                                                       | Putative uncharacterized protein                                                                               | Escherichia coli (strain 55989 / EAEC)            |
| 79306  | 284053 | 284343 TY-2482_chromosome | D3H2S6                                                                       | Putative phage lysis protein                                                                                   | Escherichia coli O44:H18 (strain 042 / EAEC)      |
| 73644  | 284351 | 285154 TY-2482_chromosome | B7LE52                                                                       | Putative uncharacterized protein                                                                               | Escherichia coli (strain 55989 / EAEC)            |
| 111796 | 285200 | 285730 TY-2482_chromosome | C8U3C5                                                                       | Lysozyme (EC 3.2.1.17)                                                                                         | Escherichia coli O103:H2 (strain 12009 / EHEC)    |
| 113937 | 285811 | 286020 TY-2482_chromosome | B7LES5                                                                       | Putative uncharacterized protein                                                                               | Escherichia coli (strain 55989 / EAEC)            |
| 102801 | 286004 | 286273 TY-2482_chromosome | B7LES6                                                                       | Putative uncharacterized protein                                                                               | Escherichia coli (strain 55989 / EAEC)            |
| 29210  | 286376 | 286840 TY-2482_chromosome | D3QSD5                                                                       | Endopeptidase                                                                                                  | Escherichia coli O55:H7 (strain CB9615 / EPEC)    |
| 23807  | 287143 | 287346 TY-2482_chromosome | E3Y9Y5                                                                       | Putative uncharacterized protein                                                                               | Shigella flexneri 2a str. 2457T                   |
| 12060  | 287803 | 288204 TY-2482_chromosome | D8EE44                                                                       | Putative uncharacterized protein                                                                               | Escherichia coli MS 119-7                         |
| 27275  | 288353 | 289153 TY-2482_chromosome | A1AAK5                                                                       | Prophage Qin DNA packaging protein NU1-like protein                                                            | Escherichia coli O1:K1 / APEC                     |
| 84565  | 289086 | 291053 TY-2482_chromosome | B7L465                                                                       | Terminase large subunit (Gp2)                                                                                  | Escherichia coli (strain 55989 / EAEC)            |
| 88462  | 291040 | 291243 TY-2482_chromosome | B7L466                                                                       | Head stabilization protein (Head protein Gp3)                                                                  | Escherichia coli (strain 55989 / EAEC)            |
| 91971  | 291243 | 292832 TY-2482_chromosome | B7L467                                                                       | Portal protein (Head protein Gp4)                                                                              | Escherichia coli (strain 55989 / EAEC)            |
| 115786 | 292825 | 294327 TY-2482_chromosome | C8U3B6                                                                       | Putative head protein/prohead protease                                                                         | Escherichia coli O103:H2 (strain 12009 / EHEC)    |

|        |        |                           |        |                                                                                                                      |                                                          |
|--------|--------|---------------------------|--------|----------------------------------------------------------------------------------------------------------------------|----------------------------------------------------------|
| 105237 | 294367 | 294711 TY-2482_chromosome | D3H3D9 | Phage head decoration protein                                                                                        | Escherichia coli O44:H18 (strain O42 / EAEC)             |
| 95640  | 294772 | 295797 TY-2482_chromosome | B7L470 | Major head protein (Head protein gp7)                                                                                | Escherichia coli (strain 55989 / EAEC)                   |
| 23542  | 295852 | 296217 TY-2482_chromosome | E6B8R1 | Uncharacterized 13.5 kDa protein in GP7-GP8 intergenic region                                                        | Escherichia coli 3431                                    |
| 26114  | 296201 | 296563 TY-2482_chromosome | B7MSC9 | Tail attachment protein (Minor capsid protein FI)                                                                    | Escherichia coli O81 (strain ED1a)                       |
| 60230  | 296581 | 297153 TY-2482_chromosome | D3H3E3 | Phage minor tail protein                                                                                             | Escherichia coli O44:H18 (strain O42 / EAEC)             |
| 114313 | 297153 | 297545 TY-2482_chromosome | C8U3B0 | Putative minor tail protein                                                                                          | Escherichia coli O103:H2 (strain 12009 / EHEC)           |
| 25167  | 298983 | 297652 TY-2482_chromosome | A1AAL5 | Putative uncharacterized protein                                                                                     | Escherichia coli O1:K1 / APEC                            |
| 26151  | 299174 | 301744 TY-2482_chromosome | B7LEU0 | Minor tail protein H                                                                                                 | Escherichia coli (strain 55989 / EAEC)                   |
| 82999  | 301744 | 302070 TY-2482_chromosome | C8TUH3 | Putative minor tail protein                                                                                          | Escherichia coli O26:H11 (strain 11368 / EHEC)           |
| 79403  | 302734 | 303516 TY-2482_chromosome | B7LEU3 | Putative tail fiber component K of prophage                                                                          | Escherichia coli (strain 55989 / EAEC)                   |
| 27266  | 302777 | 301980 TY-2482_chromosome | Q1RCC4 | Putative uncharacterized protein                                                                                     | Escherichia coli (strain UT189 / UPEC)                   |
| 26121  | 303417 | 304055 TY-2482_chromosome | B7ULV9 | Predicted tail assembly protein                                                                                      | Escherichia coli O127:H6 (strain E2348/69 / EPEC)        |
| 24901  | 304120 | 304467 TY-2482_chromosome | B7ML65 | Putative uncharacterized protein                                                                                     | Escherichia coli O45:K1 (strain S88 / ExPEC)             |
| 29091  | 304537 | 308013 TY-2482_chromosome | B7LBD5 | Host specificity protein J of prophage                                                                               | Escherichia coli (strain 55989 / EAEC)                   |
| 98401  | 308084 | 308680 TY-2482_chromosome | D3H3F5 | Putative prophage-encoded outer membrane protein                                                                     | Escherichia coli O44:H18 (strain O42 / EAEC)             |
| 13507  | 308835 | 311666 TY-2482_chromosome | E6AYR0 | Long tail fiber protein p37                                                                                          | Escherichia coli 3431                                    |
| 25987  | 311669 | 312250 TY-2482_chromosome | B2U0E5 | Tail fiber assembly protein                                                                                          | Shigella boydii serotype 18 (strain CDC 3083-94 / B5512) |
| 100341 | 312976 | 312311 TY-2482_chromosome | D3H3F8 | Putative phage protein                                                                                               | Escherichia coli O44:H18 (strain O42 / EAEC)             |
| 26024  | 313472 | 313125 TY-2482_chromosome | A1AAM7 | Putative uncharacterized protein                                                                                     | Escherichia coli O1:K1 / APEC                            |
| 73769  | 314582 | 314079 TY-2482_chromosome | B7L489 | Putative uncharacterized protein yciE                                                                                | Escherichia coli (strain 55989 / EAEC)                   |
| 100647 | 315149 | 314631 TY-2482_chromosome | B5YZN7 | YciF protein                                                                                                         | Escherichia coli O157:H7 (strain EC4115 / EHEC)          |
| 93019  | 315417 | 315217 TY-2482_chromosome | D3H3G3 | Putative uncharacterized protein                                                                                     | Escherichia coli O44:H18 (strain O42 / EAEC)             |
| 34341  | 316580 | 315777 TY-2482_chromosome | B7L492 | Tryptophan synthase alpha chain (EC 4.2.1.20)                                                                        | Escherichia coli (strain 55989 / EAEC)                   |
| 34345  | 317773 | 316583 TY-2482_chromosome | B7L493 | Tryptophan synthase beta chain (EC 4.2.1.20)                                                                         | Escherichia coli (strain 55989 / EAEC)                   |
| 78798  | 319143 | 317788 TY-2482_chromosome | B7L494 | Fused indole-3-glycerolphosphate synthetase ; N-(5-phosphoribosyl)anthranilate isomerase (EC 4.1.1.48) (EC 5.3.1.24) | Escherichia coli (strain 55989 / EAEC)                   |
| 99115  | 320778 | 319150 TY-2482_chromosome | B7L495 | Fused glutamine amidotransferase (Component II) of anthranilate synthase ; anthranilate phosphoribosyl transferase   | Escherichia coli (strain 55989 / EAEC)                   |
| 98114  | 322340 | 320781 TY-2482_chromosome | B7L496 | Component I of anthranilate synthase (EC 4.1.3.27)                                                                   | Escherichia coli (strain 55989 / EAEC)                   |
| 62653  | 322614 | 323492 TY-2482_chromosome | B7L498 | Putative uncharacterized protein yciV                                                                                | Escherichia coli (strain 55989 / EAEC)                   |
| 84359  | 323456 | 324109 TY-2482_chromosome | B5YZP6 | Sua5/YciO/YrdC/YwlC family protein                                                                                   | Escherichia coli O157:H7 (strain EC4115 / EHEC)          |
| 87165  | 324186 | 325082 TY-2482_chromosome | B7L4A0 | Pseudouridine synthase (EC 5.4.99.-)                                                                                 | Escherichia coli (strain 55989 / EAEC)                   |
| 83995  | 325715 | 325128 TY-2482_chromosome | B7L4A1 | Cob(I)alamin adenosyltransferase/cobinamide ATP-dependent adenosyltransferase (EC 2.5.1.-) (EC 2.5.1.17)             | Escherichia coli (strain 55989 / EAEC)                   |
| 111574 | 326470 | 325715 TY-2482_chromosome | B7L4A2 | Putative oxoacyl-(Acyl carrier protein) reductase                                                                    | Escherichia coli (strain 55989 / EAEC)                   |
| 77487  | 326690 | 327736 TY-2482_chromosome | B7L4A4 | Putative inner membrane peptidase                                                                                    | Escherichia coli (strain 55989 / EAEC)                   |
| 95649  | 328026 | 327778 TY-2482_chromosome | B7L4A5 | Putative uncharacterized protein yciN                                                                                | Escherichia coli (strain 55989 / EAEC)                   |
| 28027  | 328071 | 328280 TY-2482_chromosome | B7L4A6 | Putative uncharacterized protein                                                                                     | Escherichia coli (strain 55989 / EAEC)                   |
| 58043  | 328406 | 331048 TY-2482_chromosome | B7L4A7 | DNA topoisomerase (EC 5.99.1.2)                                                                                      | Escherichia coli (strain 55989 / EAEC)                   |
| 91975  | 331261 | 332232 TY-2482_chromosome | B7L4A8 | DNA-binding transcriptional dual regulator, O-acetyl-L-serine-binding                                                | Escherichia coli (strain 55989 / EAEC)                   |
| 75480  | 332675 | 332860 TY-2482_chromosome | B7L4B0 | Putative uncharacterized protein                                                                                     | Escherichia coli (strain 55989 / EAEC)                   |
| 114110 | 333236 | 335908 TY-2482_chromosome | B7L4B2 | Aconitate hydratase 1 (EC 4.2.1.3)                                                                                   | Escherichia coli (strain 55989 / EAEC)                   |
| 33397  | 336565 | 335978 TY-2482_chromosome | B7L4B3 | GTP cyclohydrolase-2 (EC 3.5.4.25) (GTP cyclohydrolase II)                                                           | Escherichia coli (strain 55989 / EAEC)                   |
| 15357  | 336735 | 337600 TY-2482_chromosome | E6BMY3 | Conserved domain protein                                                                                             | Escherichia coli MS 85-1                                 |
| 78879  | 337648 | 337953 TY-2482_chromosome | B7L4B5 | Putative uncharacterized protein yciS                                                                                | Escherichia coli (strain 55989 / EAEC)                   |
| 84642  | 337963 | 339129 TY-2482_chromosome | B7L4B6 | Putative uncharacterized protein yciM                                                                                | Escherichia coli (strain 55989 / EAEC)                   |
| 110464 | 339265 | 340059 TY-2482_chromosome | B5YZR3 | Orotidine 5'-phosphate decarboxylase (EC 4.1.1.23) (OMP decarboxylase)                                               | Escherichia coli O157:H7 (strain EC4115 / EHEC)          |
| 89944  | 340062 | 340385 TY-2482_chromosome | B7L4B8 | Putative uncharacterized protein yciH                                                                                | Escherichia coli (strain 55989 / EAEC)                   |
| 111728 | 340732 | 340517 TY-2482_chromosome | B7L4B9 | Lipoprotein                                                                                                          | Escherichia coli (strain 55989 / EAEC)                   |
| 105492 | 341750 | 341004 TY-2482_chromosome | B7L4C0 | DNA-binding transcriptional repressor, DeoR family                                                                   | Escherichia coli (strain 55989 / EAEC)                   |
| 108201 | 342055 | 341843 TY-2482_chromosome | B7L4C1 | Putative uncharacterized protein                                                                                     | Escherichia coli (strain 55989 / EAEC)                   |
| 109507 | 344145 | 342163 TY-2482_chromosome | B7L4C2 | Modulator of Rnase II stability                                                                                      | Escherichia coli (strain 55989 / EAEC)                   |
| 33605  | 346315 | 344384 TY-2482_chromosome | B7L4C3 | Exoribonuclease 2 (EC 3.1.13.1) (Exoribonuclease II) (Ribonuclease II)                                               | Escherichia coli (strain 55989 / EAEC)                   |
| 76079  | 347510 | 346386 TY-2482_chromosome | B7L4C4 | Putative amidase or amidotransferase                                                                                 | Escherichia coli (strain 55989 / EAEC)                   |
| 69037  | 348443 | 347658 TY-2482_chromosome | B7L4C5 | Enoyl-[acyl-carrier-protein] reductase, NADH-dependent (EC 1.3.1.9)                                                  | Escherichia coli (strain 55989 / EAEC)                   |
| 59050  | 349166 | 348816 TY-2482_chromosome | B7L5A7 | Putative uncharacterized protein yciD                                                                                | Escherichia coli (strain 55989 / EAEC)                   |
| 90380  | 350040 | 349237 TY-2482_chromosome | B7L554 | Antimicrobial peptide transporter subunit ; ATP-binding component of ABC superfamily transporte                      | Escherichia coli (strain 55989 / EAEC)                   |
| 81039  | 351034 | 350045 TY-2482_chromosome | B7L555 | Antimicrobial peptide transporter subunit; ATP-binding component of ABC superfamily transporte                       | Escherichia coli (strain 55989 / EAEC)                   |
| 62791  | 351924 | 351037 TY-2482_chromosome | B7L556 | Antimicrobial peptide transporter subunit ; permease component of ABC superfamily transporte                         | Escherichia coli (strain 55989 / EAEC)                   |
| 91928  | 352876 | 351914 TY-2482_chromosome | B7L557 | Antimicrobial peptide transporter subunit ; permease component of ABC superfamily transporte                         | Escherichia coli (strain 55989 / EAEC)                   |
| 110409 | 354516 | 352876 TY-2482_chromosome | B7L558 | Antimicrobial peptide transporter subunit; periplasmic-binding component of ABC superfamily transporte               | Escherichia coli (strain 55989 / EAEC)                   |
| 114069 | 355073 | 354831 TY-2482_chromosome | B7L559 | Putative uncharacterized protein ymjA                                                                                | Escherichia coli (strain 55989 / EAEC)                   |
| 99147  | 356592 | 355210 TY-2482_chromosome | B7L560 | Putrescine importer                                                                                                  | Escherichia coli (strain 55989 / EAEC)                   |
| 88419  | 358313 | 356898 TY-2482_chromosome | B7L561 | Gamma-Glu-putrescine synthase                                                                                        | Escherichia coli (strain 55989 / EAEC)                   |
| 60234  | 358513 | 359286 TY-2482_chromosome | D3H3K5 | Gamma-glutamyl-gamma-aminobutyrate hydrolase (EC 3.5.1.-)                                                            | Escherichia coli O44:H18 (strain O42 / EAEC)             |
| 81049  | 359316 | 359870 TY-2482_chromosome | B7L563 | DNA-binding transcriptional repressor                                                                                | Escherichia coli (strain 55989 / EAEC)                   |
| 99149  | 360148 | 361632 TY-2482_chromosome | B7L564 | Gamma-Glu-gamma-aminobutyraldehyde dehydrogenase, NAD(P)H-dependent (EC 1.2.1.3)                                     | Escherichia coli (strain 55989 / EAEC)                   |

|        |        |                           |                                  |                                                                                                                |                                                  |
|--------|--------|---------------------------|----------------------------------|----------------------------------------------------------------------------------------------------------------|--------------------------------------------------|
| 90224  | 361637 | 362914 TY-2482_chromosome | B7L565                           | Gamma-Glu-putrescine oxidase, FAD/NAD(P)-binding                                                               | Escherichia coli (strain 55989 / EAEC)           |
| 80936  | 362955 | 364217 TY-2482_chromosome | B7L566                           | GABA aminotransferase, PLP-dependent (EC 2.6.1.19)                                                             | Escherichia coli (strain 55989 / EAEC)           |
| 65763  | 365317 | 364343 TY-2482_chromosome | B7L567                           | DNA-binding transcriptional activator                                                                          | Escherichia coli (strain 55989 / EAEC)           |
| 72899  | 365484 | 366149 TY-2482_chromosome | B7L568                           | Regulatory protein for phage-shock-protein operon                                                              | Escherichia coli (strain 55989 / EAEC)           |
| 73841  | 366430 | 366786 TY-2482_chromosome | B7L570                           | DNA-binding transcriptional activator                                                                          | Escherichia coli (strain 55989 / EAEC)           |
| 29237  | 366482 | 366228 TY-2482_chromosome | Q8FHS4                           | Putative uncharacterized protein                                                                               | Escherichia coli O6                              |
| 73637  | 366798 | 367016 TY-2482_chromosome | B7L571                           | Peripheral inner membrane phage-shock protein                                                                  | Escherichia coli (strain 55989 / EAEC)           |
| 76219  | 367094 | 367405 TY-2482_chromosome | B7L572                           | Thiosulfate:cyanide sulfurtransferase (Rhodanese) (EC 2.8.1.1)                                                 | Escherichia coli (strain 55989 / EAEC)           |
| 91777  | 367621 | 369297 TY-2482_chromosome | B7L573                           | Putative glucosyltransferase                                                                                   | Escherichia coli (strain 55989 / EAEC)           |
| 93939  | 369314 | 370603 TY-2482_chromosome | B7L574                           | Putative sugar transporter subunit: periplasmic-binding component of ABC superfamily transporter               | Escherichia coli (strain 55989 / EAEC)           |
| 96978  | 370627 | 371505 TY-2482_chromosome | B7L575                           | Putative sugar transporter subunit: permease component of ABC superfamily transporter                          | Escherichia coli (strain 55989 / EAEC)           |
| 86623  | 371495 | 372334 TY-2482_chromosome | B7L576                           | Putative sugar transporter subunit: permease component of ABC superfamily transporter                          | Escherichia coli (strain 55989 / EAEC)           |
| 62748  | 372368 | 373417 TY-2482_chromosome | B7L577                           | Putative oxidoreductase, Zn-dependent and NAD(P)-binding                                                       | Escherichia coli (strain 55989 / EAEC)           |
| 66392  | 373438 | 374223 TY-2482_chromosome | B7L578                           | Putative isomerase/epimerase                                                                                   | Escherichia coli (strain 55989 / EAEC)           |
| 88878  | 374236 | 375288 TY-2482_chromosome | C8TR14                           | Predicted oxidoreductase, NADH-binding                                                                         | Escherichia coli O26:H11 (strain 11368 / EHEC)   |
| 77349  | 375288 | 377552 TY-2482_chromosome | B7L581                           | Putative glycosyl hydrolase/phosphorylase                                                                      | Escherichia coli (strain 55989 / EAEC)           |
| 84466  | 377552 | 378208 TY-2482_chromosome | B7L582                           | Putative glucose-1-phosphate phosphodismutase, beta-phosphoglucomutase                                         | Escherichia coli (strain 55989 / EAEC)           |
| 84484  | 378225 | 379304 TY-2482_chromosome | B7L583                           | Putative sugar transporter subunit: ATP-binding component of ABC superfamily transporter                       | Escherichia coli (strain 55989 / EAEC)           |
| 115503 | 379352 | 380254 TY-2482_chromosome | B7L584                           | Outer membrane porin                                                                                           | Escherichia coli (strain 55989 / EAEC)           |
| 87709  | 381366 | 380371 TY-2482_chromosome | B7L585                           | Putative DNA-binding transcriptional regulator                                                                 | Escherichia coli (strain 55989 / EAEC)           |
| 107980 | 381521 | 382915 TY-2482_chromosome | B7L586                           | Putative uncharacterized protein ycjX                                                                          | Escherichia coli (strain 55989 / EAEC)           |
| 34823  | 382915 | 383973 TY-2482_chromosome | B7L587                           | UPF0283 membrane protein ycjF                                                                                  | Escherichia coli (strain 55989 / EAEC)           |
| 72983  | 384124 | 385662 TY-2482_chromosome | B7L588                           | DNA-binding transcriptional dual regulator, tyrosine-binding                                                   | Escherichia coli (strain 55989 / EAEC)           |
| 102781 | 386215 | 385712 TY-2482_chromosome | B7L589                           | Lipid hydroperoxide peroxidase (EC 1.11.1.-)                                                                   | Escherichia coli (strain 55989 / EAEC)           |
| 115661 | 386334 | 387296 TY-2482_chromosome | B7L590                           | L-Ala-D/L-Glu epimerase                                                                                        | Escherichia coli (strain 55989 / EAEC)           |
| 72202  | 388062 | 387277 TY-2482_chromosome | B7L591                           | Murein peptide amidase A                                                                                       | Escherichia coli (strain 55989 / EAEC)           |
| 62683  | 389270 | 388341 TY-2482_chromosome | B7L593                           | Putative hydrolase                                                                                             | Escherichia coli (strain 55989 / EAEC)           |
| 62684  | 389396 | 390292 TY-2482_chromosome | B7L594                           | Putative nucleic acid-binding regulator                                                                        | Escherichia coli (strain 55989 / EAEC)           |
| 110592 | 390632 | 392242 TY-2482_chromosome | B7L595                           | Murein tripeptide (L-ala-gamma-D-glutamyl-meso-DAP) transporter subunit ; periplasmic-binding component of ABC | Escherichia coli (strain 55989 / EAEC)           |
| 64808  | 393327 | 392299 TY-2482_chromosome | B7L596                           | Putative uncharacterized protein ynaI                                                                          | Escherichia coli (strain 55989 / EAEC)           |
| 72270  | 393571 | 393825 TY-2482_chromosome | B7L597                           | Putative uncharacterized protein ynaJ                                                                          | Escherichia coli (strain 55989 / EAEC)           |
| 100984 | 394828 | 393881 TY-2482_chromosome | B7L598                           | Stress-induced protein                                                                                         | Escherichia coli (strain 55989 / EAEC)           |
| 79806  | 395732 | 394983 TY-2482_chromosome | B7L599                           | DNA-binding transcriptional dual regulator, global regulator of anaerobic growth                               | Escherichia coli (strain 55989 / EAEC)           |
| 91247  | 396442 | 395930 TY-2482_chromosome | B7L5A0                           | O-6-alkylguanine-DNA:cysteine-protein methyltransferase (EC 2.1.1.63)                                          | Escherichia coli (strain 55989 / EAEC)           |
| 94279  | 397979 | 396456 TY-2482_chromosome | B7L5A1                           | Para-aminobenzoyl-glutamate transporter                                                                        | Escherichia coli (strain 55989 / EAEC)           |
| 24352  | 398103 | 397912 TY-2482_chromosome | B7L5A2                           | Putative uncharacterized protein                                                                               | Escherichia coli (strain 55989 / EAEC)           |
| 84568  | 399461 | 398019 TY-2482_chromosome | B7L5A3                           | Putative peptidase, aminobenzoyl-glutamate utilization protein                                                 | Escherichia coli (strain 55989 / EAEC)           |
| 80943  | 400771 | 399464 TY-2482_chromosome | B7L5A4                           | Putative peptidase, para-aminobenzoyl-glutamate utilization protein (EC 3.5.1.14)                              | Escherichia coli (strain 55989 / EAEC)           |
| 65713  | 400947 | 401852 TY-2482_chromosome | B7L5A5                           | DNA-binding transcriptional regulator                                                                          | Escherichia coli (strain 55989 / EAEC)           |
| r112   | 402015 | 401858 TY-2482_chromosome | ref NC_010473 :1493072-1493229 - | [gene=isrA] [locus_tag=ECDH10B_1460]                                                                           |                                                  |
| 108074 | 402185 | 402745 TY-2482_chromosome | B7L5A6                           | Putative uncharacterized protein ydaL                                                                          | Escherichia coli (strain 55989 / EAEC)           |
| 87632  | 404001 | 402772 TY-2482_chromosome | B7L5A8                           | Putative diguanylate cyclase, GG[D/E]EF domain signalling protein                                              | Escherichia coli (strain 55989 / EAEC)           |
| 35088  | 404256 | 405236 TY-2482_chromosome | B7L5A9                           | Zinc transport protein ZntB                                                                                    | Escherichia coli (strain 55989 / EAEC)           |
| 111888 | 405333 | 405548 TY-2482_chromosome | D3H4C2                           | Putative uncharacterized protein                                                                               | Escherichia coli O44:H18 (strain 042 / EAEC)     |
| 91996  | 405705 | 405472 TY-2482_chromosome | C6UTJ2                           | Putative uncharacterized protein                                                                               | Escherichia coli O157:H7 (strain TW14359 / EHEC) |
| 69943  | 405717 | 407087 TY-2482_chromosome | B7L5B1                           | ATP-dependent RNA helicase, specific for 23S rRNA                                                              | Escherichia coli (strain 55989 / EAEC)           |
| 34376  | 408154 | 407222 TY-2482_chromosome | B7L5B2                           | tRNA 2-thiocytidine biosynthesis protein TtcA                                                                  | Escherichia coli (strain 55989 / EAEC)           |
| 71306  | 408836 | 408333 TY-2482_chromosome | D3H4I5                           | Putative universal stress protein                                                                              | Escherichia coli O44:H18 (strain 042 / EAEC)     |
| 95470  | 410038 | 408908 TY-2482_chromosome | B7L5B4                           | Outer membrane pore protein N, non-specific                                                                    | Escherichia coli (strain 55989 / EAEC)           |
| r193   | 410266 | 410374 TY-2482_chromosome | ref NC_010473 :1525740-1525848 - | [gene=micC] [locus_tag=ECDH10B_1501]                                                                           |                                                  |
| 113463 | 413929 | 410408 TY-2482_chromosome | B7L5B5                           | Pyruvate-flavodoxin oxidoreductase (EC 1.2.7.-)                                                                | Escherichia coli (strain 55989 / EAEC)           |
| 115890 | 414440 | 414003 TY-2482_chromosome | D3H4I8                           | Putative uncharacterized protein                                                                               | Escherichia coli O44:H18 (strain 042 / EAEC)     |
| 104978 | 414888 | 414469 TY-2482_chromosome | B7L5B7                           | Heat-inducible protein                                                                                         | Escherichia coli (strain 55989 / EAEC)           |
| 91796  | 415988 | 415002 TY-2482_chromosome | B7L5B8                           | Fermentative D-lactate dehydrogenase, NAD-dependent (EC 1.1.1.28)                                              | Escherichia coli (strain 55989 / EAEC)           |
| 106438 | 416196 | 418832 TY-2482_chromosome | B7L5B9                           | Putative uncharacterized protein ydbH                                                                          | Escherichia coli (strain 55989 / EAEC)           |
| 95464  | 419025 | 419348 TY-2482_chromosome | B7L6A3                           | Putative uncharacterized protein ydbL                                                                          | Escherichia coli (strain 55989 / EAEC)           |
| 101772 | 420428 | 419526 TY-2482_chromosome | B7L6A4                           | DNA-binding transcriptional dual regulator                                                                     | Escherichia coli (strain 55989 / EAEC)           |
| 84467  | 420664 | 422160 TY-2482_chromosome | B7L6A5                           | Phenylacetaldehyde dehydrogenase (EC 1.2.1.39)                                                                 | Escherichia coli (strain 55989 / EAEC)           |
| 60720  | 424494 | 422224 TY-2482_chromosome | B7L6A6                           | Primary amine oxidase                                                                                          | Escherichia coli (strain 55989 / EAEC)           |
| 108561 | 426787 | 424745 TY-2482_chromosome | B7L6A7                           | Fused aldehyde dehydrogenase ; enoyl-CoA hydratase                                                             | Escherichia coli (strain 55989 / EAEC)           |
| 75439  | 427072 | 427998 TY-2482_chromosome | B7L6A8                           | Putative multicomponent oxygenase/reductase subunit for phenylacetic acid degradation                          | Escherichia coli (strain 55989 / EAEC)           |
| 75288  | 428013 | 428297 TY-2482_chromosome | B7L6A9                           | Putative multicomponent oxygenase/reductase subunit for phenylacetic acid degradation                          | Escherichia coli (strain 55989 / EAEC)           |
| 69940  | 428309 | 429052 TY-2482_chromosome | B7L6B0                           | Putative multicomponent oxygenase/reductase subunit for phenylacetic acid degradation                          | Escherichia coli (strain 55989 / EAEC)           |
| 68638  | 429070 | 429564 TY-2482_chromosome | B7L6B1                           | Putative multicomponent oxygenase/reductase subunit for phenylacetic acid degradation                          | Escherichia coli (strain 55989 / EAEC)           |

|        |        |                           |        |                                                                                                                   |                                                 |
|--------|--------|---------------------------|--------|-------------------------------------------------------------------------------------------------------------------|-------------------------------------------------|
| 115414 | 429575 | 430642 TY-2482_chromosome | B7L6B2 | Subunit of the phenylacetyl-CoA oxygenase/reductase                                                               | Escherichia coli (strain 55989 / EAEC)          |
| 88368  | 430642 | 431406 TY-2482_chromosome | B7L6B3 | Enoyl-CoA hydratase-isomerase (EC 4.2.1.17)                                                                       | Escherichia coli (strain 55989 / EAEC)          |
| 82453  | 431409 | 432194 TY-2482_chromosome | B7L6B4 | Acyl-CoA hydratase (EC 4.2.1.17)                                                                                  | Escherichia coli (strain 55989 / EAEC)          |
| 108038 | 432199 | 433623 TY-2482_chromosome | B7L6B5 | 3-hydroxybutyryl-CoA dehydrogenase (EC 1.1.1.157)                                                                 | Escherichia coli (strain 55989 / EAEC)          |
| 88245  | 433616 | 434035 TY-2482_chromosome | B7L6B6 | Phenylacetate pathway hotdog-fold thioesterase                                                                    | Escherichia coli (strain 55989 / EAEC)          |
| 95465  | 434038 | 435240 TY-2482_chromosome | B7L6B7 | Beta-ketoacyl CoA thiolase                                                                                        | Escherichia coli (strain 55989 / EAEC)          |
| 66393  | 435270 | 436580 TY-2482_chromosome | B7L6B8 | Phenylacetyl-CoA ligase (EC 6.2.1.30)                                                                             | Escherichia coli (strain 55989 / EAEC)          |
| 114000 | 436684 | 437631 TY-2482_chromosome | B7L6B9 | DNA-binding transcriptional repressor of phenylacetic acid degradation, aryl-CoA responsive                       | Escherichia coli (strain 55989 / EAEC)          |
| 116098 | 437616 | 438203 TY-2482_chromosome | B7L6C0 | Putative hexapeptide repeat acetyltransferase                                                                     | Escherichia coli (strain 55989 / EAEC)          |
| 64420  | 438436 | 439293 TY-2482_chromosome | B7L6C1 | Putative aldo/keto reductase, NAD(P)-binding                                                                      | Escherichia coli (strain 55989 / EAEC)          |
| 99053  | 439360 | 441663 TY-2482_chromosome | B7L6C2 | Putative uncharacterized protein ydbD                                                                             | Escherichia coli (strain 55989 / EAEC)          |
| 102777 | 441837 | 442439 TY-2482_chromosome | B7L6C3 | Putative uncharacterized protein ynbA                                                                             | Escherichia coli (strain 55989 / EAEC)          |
| 77350  | 442442 | 443335 TY-2482_chromosome | B7L6C4 | Phosphatidate cytidyltransferase (EC 2.7.7.41)                                                                    | Escherichia coli (strain 55989 / EAEC)          |
| 66394  | 443354 | 445108 TY-2482_chromosome | B7L6C5 | Putative hydrolase                                                                                                | Escherichia coli (strain 55989 / EAEC)          |
| 102778 | 445125 | 446414 TY-2482_chromosome | B7L6C6 | Putative membrane associated phosphatase                                                                          | Escherichia coli (strain 55989 / EAEC)          |
| 73638  | 447073 | 446471 TY-2482_chromosome | B7L6C7 | NADH-azoreductase, FMN-dependent (EC 3.1.4.14)                                                                    | Escherichia coli (strain 55989 / EAEC)          |
| 66237  | 447331 | 451173 TY-2482_chromosome | B7L6C8 | ATP-dependent helicase                                                                                            | Escherichia coli (strain 55989 / EAEC)          |
| 104703 | 451448 | 452245 TY-2482_chromosome | B7L6C9 | Putative uncharacterized protein ydcF                                                                             | Escherichia coli (strain 55989 / EAEC)          |
| 99097  | 452445 | 453881 TY-2482_chromosome | B7L6D0 | Aldehyde dehydrogenase A, NAD-linked (EC 1.2.1.22)                                                                | Escherichia coli (strain 55989 / EAEC)          |
| 99107  | 454927 | 453929 TY-2482_chromosome | B7L6D1 | Glyceraldehyde-3-phosphate dehydrogenase C (EC 1.2.1.12)                                                          | Escherichia coli (strain 55989 / EAEC)          |
| 88246  | 455116 | 455643 TY-2482_chromosome | B7L6D2 | Cytochrome b561                                                                                                   | Escherichia coli (strain 55989 / EAEC)          |
| 26803  | 456130 | 456357 TY-2482_chromosome | Q0THZ6 | Putative uncharacterized protein                                                                                  | Escherichia coli O6:K15:H31 (strain 536 / UPEC) |
| 99054  | 456684 | 458321 TY-2482_chromosome | B7L6D5 | Methyl-accepting chemotaxis protein III, ribose and galactose sensor receptor                                     | Escherichia coli (strain 55989 / EAEC)          |
| 106433 | 459285 | 458365 TY-2482_chromosome | B7L6D6 | Putative DNA-binding transcriptional regulator                                                                    | Escherichia coli (strain 55989 / EAEC)          |
| 104327 | 459502 | 460842 TY-2482_chromosome | B7L6D7 | Putative uncharacterized protein ydcJ                                                                             | Escherichia coli (strain 55989 / EAEC)          |
| 20509  | 461039 | 460845 TY-2482_chromosome | D7XGD6 | Putative uncharacterized protein                                                                                  | Escherichia coli MS 84-1                        |
| 69024  | 461100 | 462722 TY-2482_chromosome | B7L6D8 | Glucans biosynthesis protein D                                                                                    | Escherichia coli (strain 55989 / EAEC)          |
| 69941  | 462849 | 462649 TY-2482_chromosome | B7L6D9 | Putative uncharacterized protein                                                                                  | Escherichia coli (strain 55989 / EAEC)          |
| 82638  | 462865 | 463086 TY-2482_chromosome | B7L6E0 | Putative uncharacterized protein ydcH                                                                             | Escherichia coli (strain 55989 / EAEC)          |
| 59049  | 463137 | 463685 TY-2482_chromosome | B7L6E1 | Ribosomal-protein-L7/L12-serine acetyltransferase (EC 2.3.1.-)                                                    | Escherichia coli (strain 55989 / EAEC)          |
| 69942  | 464663 | 463686 TY-2482_chromosome | B7L6E2 | Putative enzyme                                                                                                   | Escherichia coli (strain 55989 / EAEC)          |
| 87828  | 464787 | 465776 TY-2482_chromosome | B7L6E3 | Potassium-tellurite ethidium and proflavin transporter                                                            | Escherichia coli (strain 55989 / EAEC)          |
| 65364  | 465776 | 466366 TY-2482_chromosome | B7L6E4 | Putative AdoMet-dependent methyltransferase                                                                       | Escherichia coli (strain 55989 / EAEC)          |
| 64157  | 466672 | 467337 TY-2482_chromosome | B7L6E5 | Putative lipoprotein                                                                                              | Escherichia coli (strain 55989 / EAEC)          |
| 19467  | 467844 | 467361 TY-2482_chromosome | B3IA33 | Transposase, family                                                                                               | Escherichia coli E22                            |
| 84526  | 467867 | 469072 TY-2482_chromosome | B7L6E8 | Putative transposase                                                                                              | Escherichia coli (strain 55989 / EAEC)          |
| 91828  | 470290 | 469118 TY-2482_chromosome | B7L6E9 | Putative benzoate transporter                                                                                     | Escherichia coli (strain 55989 / EAEC)          |
| 99083  | 470382 | 470915 TY-2482_chromosome | B7L6F0 | Putative DNA-binding transcriptional regulator                                                                    | Escherichia coli (strain 55989 / EAEC)          |
| 80909  | 470991 | 472949 TY-2482_chromosome | B7L6F1 | Putative peptidase (EC 3.4.-.-)                                                                                   | Escherichia coli (strain 55989 / EAEC)          |
| 68639  | 473274 | 473047 TY-2482_chromosome | B7L6F2 | Putative uncharacterized protein yncJ                                                                             | Escherichia coli (strain 55989 / EAEC)          |
| 16809  | 473456 | 473647 TY-2482_chromosome | D7XGF3 | Putative uncharacterized protein                                                                                  | Escherichia coli MS 84-1                        |
| 66244  | 473675 | 474109 TY-2482_chromosome | B7L6F3 | Putative DNA-binding transcriptional regulator                                                                    | Escherichia coli (strain 55989 / EAEC)          |
| 62723  | 474191 | 475594 TY-2482_chromosome | B7L6F4 | Putative DNA-binding transcriptional regulator fused with a domain with PLP-binding motif                         | Escherichia coli (strain 55989 / EAEC)          |
| 61388  | 475842 | 476984 TY-2482_chromosome | B7L6F5 | Putative spermidine/putrescine transporter subunit ; periplasmic-binding component of ABC superfamily transporter | Escherichia coli (strain 55989 / EAEC)          |
| 95502  | 477005 | 478015 TY-2482_chromosome | B7L6F6 | Putative spermidine/putrescine transporter subunit ; ATP-binding component of ABC superfamily transporter         | Escherichia coli (strain 55989 / EAEC)          |
| 80911  | 478019 | 478957 TY-2482_chromosome | B7L6F7 | Putative spermidine/putrescine transporter subunit ; permease of ABC superfamily transporter                      | Escherichia coli (strain 55989 / EAEC)          |
| 90290  | 478950 | 479741 TY-2482_chromosome | B7L6F8 | Putative spermidine/putrescine transporter subunit; permease component of ABC superfamily                         | Escherichia coli (strain 55989 / EAEC)          |
| 29648  | 479766 | 481187 TY-2482_chromosome | B7L6F9 | Gamma-aminobutyraldehyde dehydrogenase (EC 1.2.1.19) (1-pyrroline dehydrogenase) (4-aminobutanal dehydrogenase)   | Escherichia coli (strain 55989 / EAEC)          |
| 62726  | 481400 | 482206 TY-2482_chromosome | B7L6G0 | Putative acetyltransferase (EC 2.3.1.28)                                                                          | Escherichia coli (strain 55989 / EAEC)          |
| 75883  | 482551 | 482739 TY-2482_chromosome | C8TRH0 | Conserved predicted protein                                                                                       | Escherichia coli O26:H11 (strain 11368 / EHEC)  |
| 73695  | 482826 | 483071 TY-2482_chromosome | B7L6G1 | Putative uncharacterized protein ydcX                                                                             | Escherichia coli (strain 55989 / EAEC)          |
| 66225  | 483160 | 483390 TY-2482_chromosome | B7L6G2 | Putative uncharacterized protein ydcY                                                                             | Escherichia coli (strain 55989 / EAEC)          |
| 106368 | 483843 | 483397 TY-2482_chromosome | B7L6G3 | Putative uncharacterized protein ydcZ                                                                             | Escherichia coli (strain 55989 / EAEC)          |
| 80945  | 484539 | 485573 TY-2482_chromosome | B7L6G5 | Putative conserved oxidoreductase, Zn-dependent and NAD(P)-binding                                                | Escherichia coli (strain 55989 / EAEC)          |
| 79242  | 484592 | 483843 TY-2482_chromosome | B7L6G4 | Putative acyl-CoA N-acyltransferase                                                                               | Escherichia coli (strain 55989 / EAEC)          |
| 71276  | 485717 | 486436 TY-2482_chromosome | D3GR13 | GntR-family transcriptional regulator                                                                             | Escherichia coli O44:H18 (strain 042 / EAEC)    |
| 84530  | 488577 | 486478 TY-2482_chromosome | B7L6G7 | Putative iron outer membrane receptor                                                                             | Escherichia coli (strain 55989 / EAEC)          |
| 75447  | 488819 | 489877 TY-2482_chromosome | B7L6G8 | Putative uncharacterized protein yncE                                                                             | Escherichia coli (strain 55989 / EAEC)          |
| 80946  | 491492 | 489996 TY-2482_chromosome | B7L6G9 | L-asparagine transporter                                                                                          | Escherichia coli (strain 55989 / EAEC)          |
| 112507 | 491759 | 492373 TY-2482_chromosome | B7L6H0 | Putative enzyme with similarity with GST                                                                          | Escherichia coli (strain 55989 / EAEC)          |
| 103657 | 492452 | 492661 TY-2482_chromosome | C8UPQ0 | Conserved predicted protein                                                                                       | Escherichia coli O111:H- (strain 11128 / EHEC)  |
| 80892  | 493448 | 495589 TY-2482_chromosome | B7L7F8 | Putative uncharacterized protein                                                                                  | Escherichia coli (strain 55989 / EAEC)          |
| 26953  | 495660 | 499898 TY-2482_chromosome | B7L7F9 | RhsD element protein                                                                                              | Escherichia coli (strain 55989 / EAEC)          |
| 66353  | 499901 | 500359 TY-2482_chromosome | B7L7G0 | Putative uncharacterized protein                                                                                  | Escherichia coli (strain 55989 / EAEC)          |



|        |        |                           |        |                                                                                                                         |                                                  |
|--------|--------|---------------------------|--------|-------------------------------------------------------------------------------------------------------------------------|--------------------------------------------------|
| 105191 | 500623 | 501411 TY-2482_chromosome | C8UJN2 | Putative H repeat-associated protein                                                                                    | Escherichia coli O111:H- (strain 11128 / EHEC)   |
| 61323  | 502247 | 501681 TY-2482_chromosome | B7L7G3 | Putative uncharacterized protein yddH                                                                                   | Escherichia coli (strain 55989 / EAEC)           |
| 79241  | 502420 | 503262 TY-2482_chromosome | B7L7G4 | N-hydroxyarylamine O-acetyltransferase (EC 2.3.1.118)                                                                   | Escherichia coli (strain 55989 / EAEC)           |
| 64296  | 504254 | 503364 TY-2482_chromosome | B7L7G5 | Putative uncharacterized protein yddE                                                                                   | Escherichia coli (strain 55989 / EAEC)           |
| 113949 | 505013 | 504336 TY-2482_chromosome | B7L7G6 | Nitrate reductase 2 (NRZ), gamma subunit (EC 1.7.99.4)                                                                  | Escherichia coli (strain 55989 / EAEC)           |
| 83592  | 505705 | 505013 TY-2482_chromosome | B7L7G7 | Nitrate reductase 2 (NRZ), delta subunit (Assembly subunit) (EC 1.7.99.4)                                               | Escherichia coli (strain 55989 / EAEC)           |
| 65357  | 507249 | 505708 TY-2482_chromosome | B7L7G8 | Nitrate reductase 2 (NRZ), beta subunit (EC 1.7.99.4)                                                                   | Escherichia coli (strain 55989 / EAEC)           |
| 58434  | 510986 | 507249 TY-2482_chromosome | B7L7G9 | Nitrate reductase 2 (NRZ), alpha subunit (EC 1.7.99.4)                                                                  | Escherichia coli (strain 55989 / EAEC)           |
| 83810  | 512456 | 511071 TY-2482_chromosome | B7L7H0 | Nitrate/nitrite transporter                                                                                             | Escherichia coli (strain 55989 / EAEC)           |
| 69972  | 514111 | 512783 TY-2482_chromosome | B7L7H1 | Putative uncharacterized protein                                                                                        | Escherichia coli (strain 55989 / EAEC)           |
| 61736  | 514425 | 514138 TY-2482_chromosome | B7L7H2 | Outer membrane porin                                                                                                    | Escherichia coli (strain 55989 / EAEC)           |
| 103098 | 515565 | 514687 TY-2482_chromosome | CGUU60 | Predicted methyl viologen efflux pump                                                                                   | Escherichia coli O157:H7 (strain TW14359 / EHEC) |
| 98323  | 515797 | 518841 TY-2482_chromosome | B7L7H4 | Formate dehydrogenase-N, alpha subunit, nitrate-inducible (EC 1.2.1.2)                                                  | Escherichia coli (strain 55989 / EAEC)           |
| 106478 | 518857 | 519738 TY-2482_chromosome | B7L7H5 | Formate dehydrogenase-N, Fe-S (Beta) subunit, nitrate-inducible                                                         | Escherichia coli (strain 55989 / EAEC)           |
| 83812  | 519734 | 520384 TY-2482_chromosome | B7L7H6 | Formate dehydrogenase-N, cytochrome B556 (Gamma) subunit, nitrate-inducible                                             | Escherichia coli (strain 55989 / EAEC)           |
| 83390  | 520800 | 520441 TY-2482_chromosome | B7L7H7 | Putative DNA-binding transcriptional regulator                                                                          | Escherichia coli (strain 55989 / EAEC)           |
| 91826  | 521879 | 520872 TY-2482_chromosome | B7L7H8 | Alcohol dehydrogenase, 1-propanol preferring (EC 1.1.1.11)                                                              | Escherichia coli (strain 55989 / EAEC)           |
| 32101  | 523710 | 522016 TY-2482_chromosome | B7L7H9 | NAD-dependent malic enzyme (NAD-ME) (EC 1.1.1.38)                                                                       | Escherichia coli (strain 55989 / EAEC)           |
| 110616 | 524321 | 524109 TY-2482_chromosome | B7L7I0 | Biofilm-dependent modulation protein                                                                                    | Escherichia coli (strain 55989 / EAEC)           |
| 71531  | 524667 | 525095 TY-2482_chromosome | B7L7I1 | Osmotically inducible, stress-inducible membrane protein                                                                | Escherichia coli (strain 55989 / EAEC)           |
| 80895  | 526080 | 525157 TY-2482_chromosome | B7L7I2 | D-ala-D-ala transporter subunit ; ATP-binding component of ABC superfamily                                              | Escherichia coli (strain 55989 / EAEC)           |
| 98310  | 527059 | 526076 TY-2482_chromosome | B7L7I3 | D-ala-D-ala transporter subunit ; ATP-binding component of ABC superfamily                                              | Escherichia coli (strain 55989 / EAEC)           |
| 83099  | 527952 | 527059 TY-2482_chromosome | B7L7I4 | D-ala-D-ala transporter subunit ; membrane component of ABC superfamily                                                 | Escherichia coli (strain 55989 / EAEC)           |
| 106480 | 528971 | 527952 TY-2482_chromosome | B7L7I5 | D-ala-D-ala transporter subunit ; membrane component of ABC superfamily                                                 | Escherichia coli (strain 55989 / EAEC)           |
| 87282  | 530523 | 528976 TY-2482_chromosome | B7L7I6 | D-ala-D-ala transporter subunit ; periplasmic-binding component of ABC superfamily                                      | Escherichia coli (strain 55989 / EAEC)           |
| 79856  | 531118 | 530540 TY-2482_chromosome | B7L7I7 | D-ala-D-ala dipeptidase, Zn-dependent (EC 3.4.13.-)                                                                     | Escherichia coli (strain 55989 / EAEC)           |
| 73689  | 533775 | 531379 TY-2482_chromosome | B7L7I8 | cAMP phosphodiesterase, heme-regulated                                                                                  | Escherichia coli (strain 55989 / EAEC)           |
| 76787  | 535182 | 533803 TY-2482_chromosome | B7L7I9 | Putative diguanylate cyclase YddV                                                                                       | Escherichia coli (strain 55989 / EAEC)           |
| 98358  | 536873 | 535557 TY-2482_chromosome | B7L7J0 | Putative lipoprotein                                                                                                    | Escherichia coli (strain 55989 / EAEC)           |
| 65753  | 538539 | 537007 TY-2482_chromosome | B7L7J1 | Glutamate:gamma-aminobutyric acid antiporter                                                                            | Escherichia coli (strain 55989 / EAEC)           |
| 113951 | 540095 | 538698 TY-2482_chromosome | B7L7J2 | Glutamate decarboxylase B, PLP-dependent (EC 4.1.1.15)                                                                  | Escherichia coli (strain 55989 / EAEC)           |
| 86220  | 543252 | 540460 TY-2482_chromosome | B7L7J3 | Putative membrane-associated peptidase                                                                                  | Escherichia coli (strain 55989 / EAEC)           |
| 108797 | 545669 | 543300 TY-2482_chromosome | B7L7J4 | Putative porin protein                                                                                                  | Escherichia coli (strain 55989 / EAEC)           |
| 110617 | 547392 | 545710 TY-2482_chromosome | B7L7J5 | Putative multidrug transporter fused subunits of ABC superfamily transporter: permease component; ATP-binding component | Escherichia coli (strain 55989 / EAEC)           |
| 75441  | 548840 | 547686 TY-2482_chromosome | B7L7J6 | Putative uncharacterized protein ydeM                                                                                   | Escherichia coli (strain 55989 / EAEC)           |
| 84531  | 550574 | 548895 TY-2482_chromosome | B7L7J7 | Putative sulfatase (EC 3.1.6.-)                                                                                         | Escherichia coli (strain 55989 / EAEC)           |
| 88298  | 551737 | 550979 TY-2482_chromosome | B7L7J8 | Putative DNA-binding transcriptional activator, AraC-type                                                               | Escherichia coli (strain 55989 / EAEC)           |
| 77380  | 554536 | 552260 TY-2482_chromosome | B7L7K0 | Putative oxidoreductase; putative molybdoenzyme                                                                         | Escherichia coli (strain 55989 / EAEC)           |
| 106491 | 555784 | 554873 TY-2482_chromosome | B7L7K1 | Putative fimbrial-like exported adhesin protein                                                                         | Escherichia coli (strain 55989 / EAEC)           |
| 105031 | 556346 | 555846 TY-2482_chromosome | B7L7K2 | Putative fimbrial-like adhesin exported protein                                                                         | Escherichia coli (strain 55989 / EAEC)           |
| 69973  | 556889 | 556362 TY-2482_chromosome | B7L7K3 | Putative fimbrial-like adhesin exported protein                                                                         | Escherichia coli (strain 55989 / EAEC)           |
| 110618 | 559554 | 556906 TY-2482_chromosome | B7L7K4 | Putative fimbrial outer membrane usher protein                                                                          | Escherichia coli (strain 55989 / EAEC)           |
| 91829  | 560315 | 559599 TY-2482_chromosome | B7L7K5 | Periplasmic chaperone                                                                                                   | Escherichia coli (strain 55989 / EAEC)           |
| 84571  | 561251 | 560643 TY-2482_chromosome | B7L7K6 | Putative major fimbrial subunit FmlA                                                                                    | Escherichia coli (strain 55989 / EAEC)           |
| 17213  | 561777 | 561559 TY-2482_chromosome | D8EA13 | Putative uncharacterized protein                                                                                        | Escherichia coli MS 119-7                        |
| 19033  | 562145 | 561924 TY-2482_chromosome | D7ZRJ7 | Conserved domain protein                                                                                                | Escherichia coli MS 187-1                        |
| 80913  | 563478 | 562159 TY-2482_chromosome | B7L7K8 | Regulator with hipB                                                                                                     | Escherichia coli (strain 55989 / EAEC)           |
| 43911  | 563771 | 563481 TY-2482_chromosome | D7YRT1 | Toxin-antitoxin system, antitoxin component, Xre family                                                                 | Escherichia coli MS 182-1                        |
| 99084  | 569374 | 563956 TY-2482_chromosome | B7L7L0 | Putative uncharacterized protein                                                                                        | Escherichia coli (strain 55989 / EAEC)           |
| 68184  | 571497 | 569908 TY-2482_chromosome | B7L7L1 | Autoinducer AI-2 kinase                                                                                                 | Escherichia coli (strain 55989 / EAEC)           |
| 115404 | 572529 | 571579 TY-2482_chromosome | B7L7L2 | DNA-binding transcriptional regulator                                                                                   | Escherichia coli (strain 55989 / EAEC)           |
| 78800  | 572778 | 574310 TY-2482_chromosome | B7L7L3 | Fused AI2 transporter subunits of ABC superfamily: ATP-binding components                                               | Escherichia coli (strain 55989 / EAEC)           |
| 112742 | 574307 | 575332 TY-2482_chromosome | B7L7L4 | AI2 transporter ; membrane component of ABC superfamily                                                                 | Escherichia coli (strain 55989 / EAEC)           |
| 62127  | 575335 | 576324 TY-2482_chromosome | B7L7L5 | AI2 transporter ; membrane component of ABC superfamily                                                                 | Escherichia coli (strain 55989 / EAEC)           |
| 61297  | 576339 | 577358 TY-2482_chromosome | B7L7L6 | AI2 transporter ; periplasmic-binding component of ABC superfamily                                                      | Escherichia coli (strain 55989 / EAEC)           |
| 80954  | 577388 | 578260 TY-2482_chromosome | B7L7L7 | Putative aldolase                                                                                                       | Escherichia coli (strain 55989 / EAEC)           |
| 69974  | 578287 | 578574 TY-2482_chromosome | B7L7L8 | Putative uncharacterized protein lsrG                                                                                   | Escherichia coli (strain 55989 / EAEC)           |
| 34196  | 578634 | 579389 TY-2482_chromosome | B7L7L9 | Trans-aconitate 2-methyltransferase (EC 2.1.1.144)                                                                      | Escherichia coli (strain 55989 / EAEC)           |
| 99035  | 580310 | 579399 TY-2482_chromosome | B7L7M0 | Putative uncharacterized protein yneE                                                                                   | Escherichia coli (strain 55989 / EAEC)           |
| 34546  | 581968 | 580520 TY-2482_chromosome | B7L7M1 | Altronate oxidoreductase (EC 1.1.1.58) (Tagaturonate dehydrogenase) (Tagaturonate reductase)                            | Escherichia coli (strain 55989 / EAEC)           |
| 18417  | 582277 | 582116 TY-2482_chromosome | E1HZE7 | Diguanylate cyclase domain protein                                                                                      | Escherichia coli MS 78-1                         |
| 59015  | 583613 | 582198 TY-2482_chromosome | B7L7M2 | Putative membrane-associated diguanylate cyclase (GGDEF domain)                                                         | Escherichia coli (strain 55989 / EAEC)           |
| 70103  | 584111 | 583755 TY-2482_chromosome | B7L7M3 | Putative uncharacterized protein yneG                                                                                   | Escherichia coli (strain 55989 / EAEC)           |
| 79327  | 585037 | 584114 TY-2482_chromosome | B7L7M4 | Putative glutaminase                                                                                                    | Escherichia coli (strain 55989 / EAEC)           |

|        |        |                           |        |                                                                                    |                                                  |
|--------|--------|---------------------------|--------|------------------------------------------------------------------------------------|--------------------------------------------------|
| 68192  | 586489 | 585104 TY-2482_chromosome | B7L7M5 | Putative aldehyde dehydrogenase                                                    | Escherichia coli (strain 55989 / EAEC)           |
| 101717 | 586590 | 587468 TY-2482_chromosome | B7L7M6 | Putative DNA-binding transcriptional regulator                                     | Escherichia coli (strain 55989 / EAEC)           |
| 7874   | 587549 | 588659 TY-2482_chromosome | P76150 | Uncharacterized protein yneK                                                       | Escherichia coli (strain K12)                    |
| 33971  | 588812 | 589999 TY-2482_chromosome | B7L8K7 | Probable sugar efflux transporter                                                  | Escherichia coli (strain 55989 / EAEC)           |
| 62758  | 590692 | 590030 TY-2482_chromosome | B7L8K8 | Putative wide-spectrum exporter                                                    | Escherichia coli (strain 55989 / EAEC)           |
| 109704 | 590904 | 591335 TY-2482_chromosome | B7L8K9 | DNA-binding transcriptional repressor of multiple antibiotic resistance            | Escherichia coli (strain 55989 / EAEC)           |
| 72621  | 591358 | 591738 TY-2482_chromosome | B7L8L0 | DNA-binding transcriptional dual activator of multiple antibiotic resistance       | Escherichia coli (strain 55989 / EAEC)           |
| 91888  | 591773 | 591988 TY-2482_chromosome | B7L8L1 | Putative uncharacterized protein marB                                              | Escherichia coli (strain 55989 / EAEC)           |
| 87778  | 593493 | 592051 TY-2482_chromosome | B7L8L2 | Putative 6-phospho-beta-glucosidase (EC 3.2.1.86)                                  | Escherichia coli (strain 55989 / EAEC)           |
| 86865  | 595185 | 593515 TY-2482_chromosome | B7L8L3 | Putative carbohydrate-specific outer membrane porin                                | Escherichia coli (strain 55989 / EAEC)           |
| 68709  | 595555 | 595244 TY-2482_chromosome | B7L8L4 | Putative phosphotransferase system PTS, lactose/cellobiose-specific IIA subunit    | Escherichia coli (strain 55989 / EAEC)           |
| 88383  | 596941 | 595583 TY-2482_chromosome | B7L8L5 | Putative phosphotransferase system IIC component (EC 2.7.1.69)                     | Escherichia coli (strain 55989 / EAEC)           |
| 88385  | 597328 | 597020 TY-2482_chromosome | B7L8L6 | Putative cellobiose-specific phosphotransferase enzyme IIB component (EC 2.7.1.69) | Escherichia coli (strain 55989 / EAEC)           |
| 83650  | 597527 | 598222 TY-2482_chromosome | B7L8L7 | Putative DNA-binding transcriptional regulator HTH family                          | Escherichia coli (strain 55989 / EAEC)           |
| 101488 | 599169 | 598273 TY-2482_chromosome | B7L8L8 | Cysteine and O-acetyl-L-serine efflux system                                       | Escherichia coli (strain 55989 / EAEC)           |
| 62759  | 599364 | 600548 TY-2482_chromosome | B7L8L9 | Putative transporter                                                               | Escherichia coli (strain 55989 / EAEC)           |
| 61543  | 600183 | 600996 TY-2482_chromosome | B7L8M0 | Putative uncharacterized protein ydeH                                              | Escherichia coli (strain 55989 / EAEC)           |
| 84579  | 602530 | 602141 TY-2482_chromosome | B7L8M1 | Putative uncharacterized protein ydeI                                              | Escherichia coli (strain 55989 / EAEC)           |
| 99134  | 602806 | 603321 TY-2482_chromosome | B7L8M2 | Putative uncharacterized protein ydeJ                                              | Escherichia coli (strain 55989 / EAEC)           |
| 96934  | 605414 | 603372 TY-2482_chromosome | B7L8M3 | Dipeptidyl carboxypeptidase II (EC 3.4.15.5)                                       | Escherichia coli (strain 55989 / EAEC)           |
| 71524  | 605536 | 606294 TY-2482_chromosome | D3GSH5 | NADP-dependent L-serine/L-allo-threonine dehydrogenase (EC 1.1.1.-)                | Escherichia coli O44:H18 (strain 042 / EAEC)     |
| 79891  | 606386 | 607069 TY-2482_chromosome | B7L8M5 | Putative DNA-binding transcriptional regulator                                     | Escherichia coli (strain 55989 / EAEC)           |
| 28806  | 607480 | 607211 TY-2482_chromosome | A1ABC3 | Putative uncharacterized protein                                                   | Escherichia coli O1:K1 / APEC                    |
| 97574  | 608949 | 607492 TY-2482_chromosome | B7L8M7 | Putative mannonate dehydrogenase                                                   | Escherichia coli (strain 55989 / EAEC)           |
| 95566  | 610321 | 609041 TY-2482_chromosome | B7L8M8 | Putative transporter                                                               | Escherichia coli (strain 55989 / EAEC)           |
| 111960 | 611482 | 610466 TY-2482_chromosome | D3GTE7 | Putative dehydrogenase (EC 1.1.1.-)                                                | Escherichia coli O44:H18 (strain 042 / EAEC)     |
| 60468  | 612708 | 611497 TY-2482_chromosome | B7L5D3 | Putative enolase/dehydratase                                                       | Escherichia coli (strain 55989 / EAEC)           |
| 115116 | 613249 | 612917 TY-2482_chromosome | D3GTE9 | UPF0060 membrane protein ynfA                                                      | Escherichia coli O44:H18 (strain 042 / EAEC)     |
| 35032  | 613375 | 613713 TY-2482_chromosome | B7L5D5 | UPF0482 protein ynfB                                                               | Escherichia coli (strain 55989 / EAEC)           |
| 96965  | 613751 | 614308 TY-2482_chromosome | B7L5D6 | Spermidine N1-acetyltransferase (EC 2.3.1.57)                                      | Escherichia coli (strain 55989 / EAEC)           |
| 90641  | 615060 | 614317 TY-2482_chromosome | B52420 | Putative membrane protein                                                          | Escherichia coli O157:H7 (strain EC4115 / EHEC)  |
| 43502  | 615129 | 615434 TY-2482_chromosome | Q6EWW5 | Putative uncharacterized protein Z2573                                             | Escherichia coli                                 |
| 79771  | 615636 | 618059 TY-2482_chromosome | B7L5D9 | Oxidoreductase subunit                                                             | Escherichia coli (strain 55989 / EAEC)           |
| 58036  | 618123 | 620543 TY-2482_chromosome | B7L5E0 | Oxidoreductase subunit                                                             | Escherichia coli (strain 55989 / EAEC)           |
| 11969  | 621078 | 621710 TY-2482_chromosome | Q8KU25 | AntB                                                                               | Escherichia coli                                 |
| 75414  | 621761 | 621979 TY-2482_chromosome | C8UMM0 | Predicted C4-type zinc finger protein                                              | Escherichia coli O111:H- (strain 11128 / EHEC)   |
| 86803  | 621979 | 622260 TY-2482_chromosome | C8UML9 | Putative uncharacterized protein                                                   | Escherichia coli O111:H- (strain 11128 / EHEC)   |
| 18615  | 622250 | 623083 TY-2482_chromosome | D7JRD8 | Putative uncharacterized protein                                                   | Escherichia coli FVEC1302                        |
| 87075  | 623061 | 623600 TY-2482_chromosome | C8TPV2 | Putative uncharacterized protein                                                   | Escherichia coli O26:H11 (strain 11368 / EHEC)   |
| 21023  | 623600 | 624100 TY-2482_chromosome | B3IP95 | Valyl-tRNA synthetase                                                              | Escherichia coli E110019                         |
| 114928 | 632855 | 624507 TY-2482_chromosome | C8UML1 | Putative uncharacterized protein                                                   | Escherichia coli O111:H- (strain 11128 / EHEC)   |
| 108406 | 634189 | 632927 TY-2482_chromosome | C8UML0 | Putative uncharacterized protein                                                   | Escherichia coli O111:H- (strain 11128 / EHEC)   |
| 24735  | 634451 | 634203 TY-2482_chromosome | B7MQ07 | Putative uncharacterized protein                                                   | Escherichia coli O81 (strain ED1a)               |
| 82723  | 634907 | 634464 TY-2482_chromosome | C8U7H7 | Putative uncharacterized protein                                                   | Escherichia coli O103:H2 (strain 12009 / EHEC)   |
| 104436 | 635566 | 634913 TY-2482_chromosome | C6UNY2 | Putative uncharacterized protein                                                   | Escherichia coli O157:H7 (strain TW14359 / EHEC) |
| 104991 | 636059 | 635661 TY-2482_chromosome | C8U7H9 | Putative uncharacterized protein                                                   | Escherichia coli O103:H2 (strain 12009 / EHEC)   |
| 77804  | 637228 | 636494 TY-2482_chromosome | C8U7I0 | Probable outer membrane Lom                                                        | Escherichia coli O103:H2 (strain 12009 / EHEC)   |
| 27638  | 637934 | 637311 TY-2482_chromosome | B7MQ02 | Putative uncharacterized protein                                                   | Escherichia coli O81 (strain ED1a)               |
| 89997  | 638209 | 637934 TY-2482_chromosome | C8U7I2 | Putative outer membrane protein                                                    | Escherichia coli O103:H2 (strain 12009 / EHEC)   |
| 96492  | 639492 | 638227 TY-2482_chromosome | C8UMK2 | Predicted tail tip fiber protein                                                   | Escherichia coli O111:H- (strain 11128 / EHEC)   |
| 110999 | 641192 | 639492 TY-2482_chromosome | C6UNY7 | Putative uncharacterized protein                                                   | Escherichia coli O157:H7 (strain TW14359 / EHEC) |
| 66843  | 644230 | 642326 TY-2482_chromosome | C8UMJ7 | Predicted tail fiber protein                                                       | Escherichia coli O111:H- (strain 11128 / EHEC)   |
| 28509  | 644877 | 644230 TY-2482_chromosome | B7MPZ2 | Putative uncharacterized protein                                                   | Escherichia coli O81 (strain ED1a)               |
| 25278  | 645500 | 644880 TY-2482_chromosome | B7MPZ1 | Putative uncharacterized protein                                                   | Escherichia coli O81 (strain ED1a)               |
| 114405 | 645885 | 645427 TY-2482_chromosome | C8UMJ4 | Putative uncharacterized protein                                                   | Escherichia coli O111:H- (strain 11128 / EHEC)   |
| 74425  | 646325 | 645939 TY-2482_chromosome | C8U7J1 | Putative uncharacterized protein                                                   | Escherichia coli O103:H2 (strain 12009 / EHEC)   |
| 111068 | 647594 | 646383 TY-2482_chromosome | C8U7J2 | Putative uncharacterized protein                                                   | Escherichia coli O103:H2 (strain 12009 / EHEC)   |
| 27093  | 648624 | 647620 TY-2482_chromosome | B7MPY7 | Putative uncharacterized protein                                                   | Escherichia coli O81 (strain ED1a)               |
| 113735 | 650926 | 648785 TY-2482_chromosome | B5YYP6 | Putative uncharacterized protein                                                   | Escherichia coli O157:H7 (strain EC4115 / EHEC)  |
| 115153 | 652632 | 650929 TY-2482_chromosome | C8UMJ9 | Putative terminase large subunit                                                   | Escherichia coli O111:H- (strain 11128 / EHEC)   |
| 63362  | 653428 | 652616 TY-2482_chromosome | C8U7J6 | Putative small subunit terminase                                                   | Escherichia coli O103:H2 (strain 12009 / EHEC)   |
| 11929  | 654031 | 654609 TY-2482_chromosome | Q07682 | Transcriptional activator AfrS                                                     | Escherichia coli                                 |
| 9898   | 655151 | 654696 TY-2482_chromosome | B2N3J6 | Bacteriophage lysis protein                                                        | Escherichia coli 53638                           |
| 11418  | 656240 | 655490 TY-2482_chromosome | B6ZXG1 | Lysozyme (EC 3.2.1.17)                                                             | Escherichia coli O157:H7 str. TW14588            |

|        |        |                           |        |                                                                                                                      |                                                    |
|--------|--------|---------------------------|--------|----------------------------------------------------------------------------------------------------------------------|----------------------------------------------------|
| 64371  | 656724 | 656320 TY-2482_chromosome | C6USU0 | Putative uncharacterized protein                                                                                     | Escherichia coli O157:H7 (strain TW14359 / EHEC    |
| 28910  | 658849 | 656912 TY-2482_chromosome | B7MPX6 | Putative uncharacterized protein                                                                                     | Escherichia coli O81 (strain ED1a)                 |
| 47546  | 658955 | 659266 TY-2482_chromosome | Q9FBI1 | Putative uncharacterized protein                                                                                     | Shigella dysenteriae                               |
| 90464  | 660019 | 659588 TY-2482_chromosome | C6UP10 | Antitermination protein Q of bacteriophage BP-933W                                                                   | Escherichia coli O157:H7 (strain TW14359 / EHEC    |
| 115410 | 660568 | 660209 TY-2482_chromosome | B7LBN5 | Crossover junction endodeoxyribonuclease rusa (EC 3.1.22.4)                                                          | Escherichia coli (strain 55989 / EAEC)             |
| 70601  | 660855 | 660568 TY-2482_chromosome | C8UK75 | Putative uncharacterized protein                                                                                     | Escherichia coli O111:H- (strain 11128 / EHEC)     |
| 56695  | 661477 | 661070 TY-2482_chromosome | C8TKU1 | Putative recombination protein                                                                                       | Escherichia coli O26:H11 (strain 11368 / EHEC)     |
| 25757  | 662203 | 661535 TY-2482_chromosome | B7MPW6 | Putative antirepressor protein Ant from prophage                                                                     | Escherichia coli O81 (strain ED1a)                 |
| 81620  | 662589 | 662914 TY-2482_chromosome | C8TS13 | Putative uncharacterized protein                                                                                     | Escherichia coli O26:H11 (strain 11368 / EHEC)     |
| 105317 | 662910 | 663224 TY-2482_chromosome | C8TS14 | Predicted DNA-binding protein                                                                                        | Escherichia coli O26:H11 (strain 11368 / EHEC)     |
| 9718   | 663763 | 663281 TY-2482_chromosome | D6I789 | Death on curing protein                                                                                              | Escherichia coli B185                              |
| 57389  | 664383 | 664174 TY-2482_chromosome | Q8X288 | Prophage maintenance protein (Putative Gef-like protein encoded by prophage CP-933N) (Putative cell killing protein) | Escherichia coli O157:H7                           |
| 115852 | 665436 | 664795 TY-2482_chromosome | C6UV05 | Putative uncharacterized protein                                                                                     | Escherichia coli O157:H7 (strain TW14359 / EHEC    |
| 104599 | 665828 | 665436 TY-2482_chromosome | C6USS4 | Putative uncharacterized protein                                                                                     | Escherichia coli O157:H7 (strain TW14359 / EHEC    |
| 96223  | 666614 | 665847 TY-2482_chromosome | C8U729 | Putative uncharacterized protein                                                                                     | Escherichia coli O103:H2 (strain 12009 / EHEC)     |
| 26951  | 667380 | 666643 TY-2482_chromosome | B7MPV9 | Putative DNA replication protein; Rac prophage                                                                       | Escherichia coli O81 (strain ED1a)                 |
| 24685  | 668469 | 667390 TY-2482_chromosome | B7MPV8 | Putative uncharacterized protein                                                                                     | Escherichia coli O81 (strain ED1a)                 |
| 28390  | 668708 | 668493 TY-2482_chromosome | B7MPV7 | Putative uncharacterized protein                                                                                     | Escherichia coli O81 (strain ED1a)                 |
| 27757  | 669019 | 668726 TY-2482_chromosome | B7MPV6 | Regulatory protein CII from prophage                                                                                 | Escherichia coli O81 (strain ED1a)                 |
| 71900  | 669358 | 669161 TY-2482_chromosome | C6UXV0 | Regulatory protein cro                                                                                               | Escherichia coli O157:H7 (strain TW14359 / EHEC    |
| 4834   | 669459 | 670169 TY-2482_chromosome | P03034 | Repressor protein CI                                                                                                 | Enterobacteria phage lambda (Bacteriophage lambda) |
| 29096  | 670219 | 670758 TY-2482_chromosome | B7MPV3 | Putative uncharacterized protein                                                                                     | Escherichia coli O81 (strain ED1a)                 |
| 28389  | 670749 | 671522 TY-2482_chromosome | B7MPV2 | Putative uncharacterized protein                                                                                     | Escherichia coli O81 (strain ED1a)                 |
| 100796 | 672020 | 672400 TY-2482_chromosome | C8U0Y9 | Probable early gene regulator N                                                                                      | Escherichia coli O103:H2 (strain 12009 / EHEC)     |
| 28731  | 672404 | 673117 TY-2482_chromosome | B7MPV0 | Putative uncharacterized protein                                                                                     | Escherichia coli O81 (strain ED1a)                 |
| 28568  | 673131 | 673508 TY-2482_chromosome | B7MPU9 | Putative uncharacterized protein                                                                                     | Escherichia coli O81 (strain ED1a)                 |
| 26950  | 673689 | 673483 TY-2482_chromosome | B7MPU8 | Putative uncharacterized protein                                                                                     | Escherichia coli O81 (strain ED1a)                 |
| 114798 | 674146 | 674364 TY-2482_chromosome | C8TT57 | Putative cell division inhibitor protein                                                                             | Escherichia coli O26:H11 (strain 11368 / EHEC)     |
| 24556  | 674451 | 674834 TY-2482_chromosome | B7MPU6 | Putative uncharacterized protein                                                                                     | Escherichia coli O81 (strain ED1a)                 |
| 100591 | 674945 | 677014 TY-2482_chromosome | C8U8P7 | Probable exonuclease                                                                                                 | Escherichia coli O103:H2 (strain 12009 / EHEC)     |
| 38271  | 677014 | 677307 TY-2482_chromosome | Q9LA40 | Gam                                                                                                                  | Shigella dysenteriae                               |
| 37295  | 677316 | 678098 TY-2482_chromosome | Q9LA41 | Bet                                                                                                                  | Shigella dysenteriae                               |
| 111968 | 678098 | 678775 TY-2482_chromosome | C6V295 | Putative exonuclease encoded by prophage CP-933K                                                                     | Escherichia coli O157:H7 (strain TW14359 / EHEC    |
| 94122  | 678826 | 679074 TY-2482_chromosome | C8TPU7 | Putative uncharacterized protein                                                                                     | Escherichia coli O26:H11 (strain 11368 / EHEC)     |
| 63694  | 679339 | 680499 TY-2482_chromosome | C8U2L7 | Predicted integrase                                                                                                  | Escherichia coli O103:H2 (strain 12009 / EHEC)     |
| 28489  | 680851 | 681942 TY-2482_chromosome | A1ABD5 | Oxidoreductase, membrane subunit                                                                                     | Escherichia coli O1:K1 / APEC                      |
| 64804  | 681988 | 682599 TY-2482_chromosome | B7L5E3 | Twin-argininine leader-binding protein for DmsA and TorA                                                             | Escherichia coli (strain 55989 / EAEC)             |
| 30321  | 682797 | 684050 TY-2482_chromosome | B7L5E4 | Voltage-gated ClC-type chloride channel ClcB                                                                         | Escherichia coli (strain 55989 / EAEC)             |
| 95476  | 684701 | 684009 TY-2482_chromosome | B7L5E5 | Dethiobiotin synthetase 2 (EC 6.3.3.3) (DTB synthetase 2) (Dethiobiotin synthase 2)                                  | Escherichia coli (strain 55989 / EAEC)             |
| 60805  | 686046 | 684829 TY-2482_chromosome | B7L5E6 | DNA-binding transcriptional repressor                                                                                | Escherichia coli (strain 55989 / EAEC)             |
| 65655  | 687074 | 686184 TY-2482_chromosome | B7L5E7 | Putative DNA-binding transcriptional regulator                                                                       | Escherichia coli (strain 55989 / EAEC)             |
| 65305  | 687181 | 688431 TY-2482_chromosome | B7L5E8 | Putative transporter; MFS type                                                                                       | Escherichia coli (strain 55989 / EAEC)             |
| 83084  | 688831 | 689163 TY-2482_chromosome | B5Z433 | Acid shock protein                                                                                                   | Escherichia coli O157:H7 (strain EC4115 / EHEC)    |
| 65038  | 689442 | 690260 TY-2482_chromosome | B7L5F0 | Putative exported metalloproteinase                                                                                  | Escherichia coli (strain 55989 / EAEC)             |
| 32222  | 690631 | 690305 TY-2482_chromosome | B7L5F1 | Spermidine export protein mdtI                                                                                       | Escherichia coli (strain 55989 / EAEC)             |
| 32226  | 690983 | 690621 TY-2482_chromosome | B7L5F2 | Spermidine export protein mdtJ                                                                                       | Escherichia coli (strain 55989 / EAEC)             |
| 113901 | 691395 | 692426 TY-2482_chromosome | B7L5F3 | Putative uncharacterized protein ydgG                                                                                | Escherichia coli (strain 55989 / EAEC)             |
| 73651  | 693842 | 692457 TY-2482_chromosome | B7L5F4 | NAD(P) transhydrogenase subunit beta (EC 1.6.1.2) (Nicotinamide nucleotide transhydrogenase subunit beta)            | Escherichia coli (strain 55989 / EAEC)             |
| 102782 | 695385 | 693856 TY-2482_chromosome | B7L5F5 | Pyridine nucleotide transhydrogenase, alpha subunit (EC 1.6.1.2)                                                     | Escherichia coli (strain 55989 / EAEC)             |
| 68116  | 695909 | 696850 TY-2482_chromosome | B7L5F6 | Putative uncharacterized protein ydgH                                                                                | Escherichia coli (strain 55989 / EAEC)             |
| 110595 | 697039 | 698418 TY-2482_chromosome | B7L5F7 | Putative arginine/ornithine antiporter transporter                                                                   | Escherichia coli (strain 55989 / EAEC)             |
| 106446 | 698458 | 699177 TY-2482_chromosome | B7L5F8 | Dihydrofolate reductase isozyme (EC 1.5.1.3)                                                                         | Escherichia coli (strain 55989 / EAEC)             |
| 72282  | 699512 | 699180 TY-2482_chromosome | B7L5F9 | Putative uncharacterized protein ydgC                                                                                | Escherichia coli (strain 55989 / EAEC)             |
| 87910  | 699605 | 700357 TY-2482_chromosome | D3GTJ4 | Two-component response regulator                                                                                     | Escherichia coli O44:H18 (strain O42 / EAEC)       |
| 66395  | 700364 | 701662 TY-2482_chromosome | B7L5G1 | Sensory histidine kinase in two-component regulatory system with RstA                                                | Escherichia coli (strain 55989 / EAEC)             |
| 34397  | 701741 | 702667 TY-2482_chromosome | B7L5G2 | DNA replication terminus site-binding protein (Ter-binding protein)                                                  | Escherichia coli (strain 55989 / EAEC)             |
| 84498  | 704070 | 702670 TY-2482_chromosome | B7L5G3 | Fumarate hydratase (Fumarase C), aerobic Class II (EC 4.2.1.2)                                                       | Escherichia coli (strain 55989 / EAEC)             |
| 113997 | 705859 | 704216 TY-2482_chromosome | B7L5G4 | Fumarate hydratase (Fumarase A), aerobic Class I (EC 4.2.1.2)                                                        | Escherichia coli (strain 55989 / EAEC)             |
| 58582  | 706058 | 707230 TY-2482_chromosome | B7L5G5 | Mannose-6-phosphate isomerase (EC 5.3.1.8)                                                                           | Escherichia coli (strain 55989 / EAEC)             |
| 77353  | 707334 | 708839 TY-2482_chromosome | B7L5G6 | Putative uncharacterized protein ydgA                                                                                | Escherichia coli (strain 55989 / EAEC)             |
| 99063  | 710152 | 708890 TY-2482_chromosome | B7L5G7 | Outer membrane porin protein for glucuronides transport                                                              | Escherichia coli (strain 55989 / EAEC)             |
| 62686  | 711564 | 710194 TY-2482_chromosome | B7L5G8 | Glucuronide transporter                                                                                              | Escherichia coli (strain 55989 / EAEC)             |
| 59051  | 713372 | 711564 TY-2482_chromosome | B7L5G9 | Beta-D-glucuronidase (EC 3.2.1.31)                                                                                   | Escherichia coli (strain 55989 / EAEC)             |
| 99064  | 714351 | 713764 TY-2482_chromosome | B7L5H0 | DNA-binding transcriptional repressor                                                                                | Escherichia coli (strain 55989 / EAEC)             |

|        |        |                           |                                                                              |                                                                                                                         |                                                   |
|--------|--------|---------------------------|------------------------------------------------------------------------------|-------------------------------------------------------------------------------------------------------------------------|---------------------------------------------------|
| 110558 | 715347 | 714583 TY-2482_chromosome | B7L5H1                                                                       | 7-alpha-hydroxysteroid dehydrogenase, NAD-dependent (EC 1.1.1.159)                                                      | Escherichia coli (strain 55989 / EAEC)            |
| 58396  | 716487 | 715462 TY-2482_chromosome | B7L5H2                                                                       | DNA-binding transcriptional repressor                                                                                   | Escherichia coli (strain 55989 / EAEC)            |
| 110008 | 716662 | 718251 TY-2482_chromosome | B7L5H3                                                                       | Fused maltose and glucose-specific PTS enzymes: IIB and IIC components (EC 2.7.1.69)                                    | Escherichia coli (strain 55989 / EAEC)            |
| 75759  | 718264 | 719433 TY-2482_chromosome | B7L5H4                                                                       | Bifunctional beta-cystathionase, PLP-dependent and regulator of maltose regulon (EC 4.4.1.8)                            | Escherichia coli (strain 55989 / EAEC)            |
| 29715  | 719540 | 720538 TY-2482_chromosome | B7L5H5                                                                       | Adenosine deaminase (EC 3.5.4.4) (Adenosine aminohydrolase)                                                             | Escherichia coli (strain 55989 / EAEC)            |
| 77355  | 721616 | 720579 TY-2482_chromosome | B7L5H6                                                                       | Putative oxidoreductase                                                                                                 | Escherichia coli (strain 55989 / EAEC)            |
| 97659  | 721784 | 721981 TY-2482_chromosome | B7L5H7                                                                       | Beta-lactam resistance membrane protein                                                                                 | Escherichia coli (strain 55989 / EAEC)            |
| 18118  | 722073 | 722333 TY-2482_chromosome | D6JA38                                                                       | Predicted protein                                                                                                       | Escherichia coli B354                             |
| 83174  | 722257 | 722469 TY-2482_chromosome | B7L5H8                                                                       | Post-transcriptional regulator                                                                                          | Escherichia coli (strain 55989 / EAEC)            |
| 113893 | 722558 | 722995 TY-2482_chromosome | B7L5H9                                                                       | Putative uncharacterized protein ydgK                                                                                   | Escherichia coli (strain 55989 / EAEC)            |
| 33617  | 723075 | 723653 TY-2482_chromosome | B7L5I0                                                                       | Electron transport complex protein rnfA                                                                                 | Escherichia coli (strain 55989 / EAEC)            |
| 33621  | 723656 | 724231 TY-2482_chromosome | B7L5I1                                                                       | Electron transport complex protein rnfB                                                                                 | Escherichia coli (strain 55989 / EAEC)            |
| 33625  | 724227 | 726446 TY-2482_chromosome | B7L5I2                                                                       | Electron transport complex protein rnfC                                                                                 | Escherichia coli (strain 55989 / EAEC)            |
| 33627  | 726450 | 727505 TY-2482_chromosome | B7L5I3                                                                       | Electron transport complex protein rnfD                                                                                 | Escherichia coli (strain 55989 / EAEC)            |
| 91800  | 727512 | 728129 TY-2482_chromosome | B7L5I4                                                                       | Putative oxidoreductase                                                                                                 | Escherichia coli (strain 55989 / EAEC)            |
| 27834  | 729130 | 728423 TY-2482_chromosome | A7ZM93                                                                       | Putative uncharacterized protein                                                                                        | Escherichia coli O139:H28 (strain E24377A / ETEC) |
| 96775  | 729594 | 729791 TY-2482_chromosome | D3GUC8                                                                       | Putative uncharacterized protein                                                                                        | Escherichia coli O44:H18 (strain O42 / EAEC)      |
| 76688  | 730077 | 731576 TY-2482_chromosome | B7L5I7                                                                       | Dipeptide and tripeptide permease A                                                                                     | Escherichia coli (strain 55989 / EAEC)            |
| 97175  | 731685 | 732287 TY-2482_chromosome | B7L5I8                                                                       | Glutathionine S-transferase (EC 2.5.1.18)                                                                               | Escherichia coli (strain 55989 / EAEC)            |
| 69396  | 733197 | 732337 TY-2482_chromosome | B7L5I9                                                                       | Pyridoxal kinase 2/pyridoxine kinase (EC 2.7.1.35)                                                                      | Escherichia coli (strain 55989 / EAEC)            |
| 34184  | 734530 | 733259 TY-2482_chromosome | B7L5J0                                                                       | Tyrosyl-tRNA synthetase (EC 6.1.1.1) (Tyrosine-tRNA ligase) (TyrRS)                                                     | Escherichia coli (strain 55989 / EAEC)            |
| 32908  | 735315 | 734662 TY-2482_chromosome | B7L5J1                                                                       | Pyridoxine/pyridoxamine 5'-phosphate oxidase (EC 1.4.3.5) (PNP/PMP oxidase) (PNPOx) (Pyridoxal 5'-phosphate synt        | Escherichia coli (strain 55989 / EAEC)            |
| 66398  | 735703 | 735377 TY-2482_chromosome | B7L5J2                                                                       | Putative lipoprotein                                                                                                    | Escherichia coli (strain 55989 / EAEC)            |
| 29780  | 736910 | 735804 TY-2482_chromosome | B7L5J3                                                                       | Anhydro-N-acetylmuramic acid kinase (EC 2.7.1.1) (AnhMurNAc kinase)                                                     | Escherichia coli (strain 55989 / EAEC)            |
| 18766  | 737184 | 737896 TY-2482_chromosome | E7URP8                                                                       | Outer membrane lipoprotein pcp                                                                                          | Escherichia coli EC4100B                          |
| 69949  | 738333 | 738566 TY-2482_chromosome | B7L5J6                                                                       | Putative uncharacterized protein ydhl                                                                                   | Escherichia coli (strain 55989 / EAEC)            |
| 65775  | 738572 | 739426 TY-2482_chromosome | B7L5J7                                                                       | Undecaprenyl pyrophosphate phosphatase                                                                                  | Escherichia coli (strain 55989 / EAEC)            |
| 93932  | 739429 | 741438 TY-2482_chromosome | B7L5J8                                                                       | Putative uncharacterized protein ydhK                                                                                   | Escherichia coli (strain 55989 / EAEC)            |
| 69950  | 741963 | 741445 TY-2482_chromosome | B7L5J9                                                                       | Superoxide dismutase [Cu-Zn] (EC 1.15.1.1)                                                                              | Escherichia coli (strain 55989 / EAEC)            |
| 80879  | 742940 | 742047 TY-2482_chromosome | B7L5K0                                                                       | Putative oxidoreductase                                                                                                 | Escherichia coli (strain 55989 / EAEC)            |
| 113360 | 743331 | 743927 TY-2482_chromosome | C8UB70                                                                       | Predicted DNA-binding transcriptional regulator                                                                         | Escherichia coli O111:H- (strain 11128 / EHEC)    |
| 86062  | 743399 | 742992 TY-2482_chromosome | B7L5K1                                                                       | Putative uncharacterized protein ydhl                                                                                   | Escherichia coli (strain 55989 / EAEC)            |
| 79401  | 743967 | 745061 TY-2482_chromosome | B7L5K3                                                                       | N-ethylmaleimide reductase, FMN-linked (EC 1.-.-.-)                                                                     | Escherichia coli (strain 55989 / EAEC)            |
| 110013 | 745145 | 745549 TY-2482_chromosome | B7L5K4                                                                       | Glyoxalase I, Ni-dependent (EC 4.4.1.5)                                                                                 | Escherichia coli (strain 55989 / EAEC)            |
| 79174  | 745655 | 746299 TY-2482_chromosome | B7L5K5                                                                       | Ribonuclease T (EC 3.1.13.-) (Exoribonuclease T)                                                                        | Escherichia coli (strain 55989 / EAEC)            |
| 110596 | 746395 | 751008 TY-2482_chromosome | B7L5K6                                                                       | Putative ATP-dependent helicase                                                                                         | Escherichia coli (strain 55989 / EAEC)            |
| 62628  | 751409 | 751065 TY-2482_chromosome | B7L5K7                                                                       | Glutaredoxin                                                                                                            | Escherichia coli (strain 55989 / EAEC)            |
| 77357  | 751743 | 752555 TY-2482_chromosome | B7L5K8                                                                       | Putative exported hydrolase                                                                                             | Escherichia coli (strain 55989 / EAEC)            |
| 97066  | 752686 | 753264 TY-2482_chromosome | B7L5K9                                                                       | Superoxide dismutase (EC 1.15.1.1)                                                                                      | Escherichia coli (strain 55989 / EAEC)            |
| 69143  | 754582 | 753416 TY-2482_chromosome | B7L5L0                                                                       | Putative efflux protein; MFS family                                                                                     | Escherichia coli (strain 55989 / EAEC)            |
| 19029  | 754924 | 755145 TY-2482_chromosome | D6JAZ2                                                                       | Predicted protein                                                                                                       | Escherichia coli B354                             |
| 33159  | 755136 | 756158 TY-2482_chromosome | B7L5L1                                                                       | HTH-type transcriptional repressor purR (Pur regulon repressor) (Purine nucleotide synthesis repressor)                 | Escherichia coli (strain 55989 / EAEC)            |
| 76155  | 757090 | 756161 TY-2482_chromosome | B7L5L2                                                                       | Putative DNA-binding transcriptional regulator; LysR-type                                                               | Escherichia coli (strain 55989 / EAEC)            |
| 72955  | 757203 | 758411 TY-2482_chromosome | B7L5L3                                                                       | Putative transporter; MFS superfamily                                                                                   | Escherichia coli (strain 55989 / EAEC)            |
| 60719  | 758705 | 759850 TY-2482_chromosome | B7L5L4                                                                       | Cyclopropane fatty acyl phospholipid synthase (Unsaturated-phospholipid methyltransferase) (EC 2.1.1.79)                | Escherichia coli (strain 55989 / EAEC)            |
| 73078  | 760534 | 759896 TY-2482_chromosome | B7L5L5                                                                       | Riboflavin synthase, alpha subunit (EC 2.5.1.9)                                                                         | Escherichia coli (strain 55989 / EAEC)            |
| 32230  | 760749 | 762119 TY-2482_chromosome | B7L5L6                                                                       | Multidrug resistance protein mdtK (Multidrug-efflux transporter)                                                        | Escherichia coli (strain 55989 / EAEC)            |
| 105236 | 763419 | 762166 TY-2482_chromosome | B7L5L7                                                                       | Putative uncharacterized protein ydhQ                                                                                   | Escherichia coli (strain 55989 / EAEC)            |
| r290   | 763727 | 763803 TY-2482_chromosome | ref NC_010473 :1835030-1835106 Val tRNA  [gene=valV] [locus_tag=ECDH10B_1799 |                                                                                                                         |                                                   |
| r288   | 763808 | 763884 TY-2482_chromosome | ref NC_010473 :1835111-1835187 Val tRNA  [gene=valW] [locus_tag=ECDH10B_1800 |                                                                                                                         |                                                   |
| 27254  | 763840 | 764265 TY-2482_chromosome | Q1RB00                                                                       | Putative uncharacterized protein                                                                                        | Escherichia coli (strain UT189 / UPEC)            |
| 59000  | 764423 | 766024 TY-2482_chromosome | B7L5L9                                                                       | Putative uncharacterized protein ydhs                                                                                   | Escherichia coli (strain 55989 / EAEC)            |
| 78947  | 766851 | 766042 TY-2482_chromosome | B7L5M0                                                                       | Putative uncharacterized protein ydht                                                                                   | Escherichia coli (strain 55989 / EAEC)            |
| 114152 | 767640 | 766858 TY-2482_chromosome | B7L5M1                                                                       | Putative cytochrome b subunit of a reductase                                                                            | Escherichia coli (strain 55989 / EAEC)            |
| 22209  | 769016 | 767640 TY-2482_chromosome | E6AKY5                                                                       | 4Fe-4S binding domain protein                                                                                           | Escherichia coli MS 16-3                          |
| 93664  | 771122 | 769023 TY-2482_chromosome | B7L5M5                                                                       | Putative ferredoxin:oxidoreductase subunit                                                                              | Escherichia coli (strain 55989 / EAEC)            |
| 105041 | 771769 | 771146 TY-2482_chromosome | B7L5M6                                                                       | Putative 4Fe-4S ferridoxin-type subunit of oxidoreductase                                                               | Escherichia coli (strain 55989 / EAEC)            |
| 86356  | 772434 | 772228 TY-2482_chromosome | B7L5M7                                                                       | Putative uncharacterized protein ydhZ                                                                                   | Escherichia coli (strain 55989 / EAEC)            |
| 65256  | 772991 | 774400 TY-2482_chromosome | B7L5M8                                                                       | Pyruvate kinase (EC 2.7.1.40)                                                                                           | Escherichia coli (strain 55989 / EAEC)            |
| 105042 | 774714 | 774947 TY-2482_chromosome | B7L5M9                                                                       | Murein lipoprotein                                                                                                      | Escherichia coli (strain 55989 / EAEC)            |
| 98995  | 776018 | 775017 TY-2482_chromosome | B7L5N0                                                                       | Putative uncharacterized protein ynhG                                                                                   | Escherichia coli (strain 55989 / EAEC)            |
| 34054  | 776583 | 776170 TY-2482_chromosome | B7L5N1                                                                       | Cysteine desulfuration protein sufE                                                                                     | Escherichia coli (strain 55989 / EAEC)            |
| 34060  | 777816 | 776599 TY-2482_chromosome | B7L5N2                                                                       | Cysteine desulfurase (EC 2.8.1.7) (Selenocysteine beta-lyase) (SCL) (Selenocysteine lyase) (EC 4.4.1.16) (Selenocystein | Escherichia coli (strain 55989 / EAEC)            |
| 59001  | 779084 | 777816 TY-2482_chromosome | B7L5N3                                                                       | Component of SufBCD complex                                                                                             | Escherichia coli (strain 55989 / EAEC)            |

|        |        |                           |                                                                        |                                                                                                                  |                                                                        |
|--------|--------|---------------------------|------------------------------------------------------------------------|------------------------------------------------------------------------------------------------------------------|------------------------------------------------------------------------|
| 106356 | 779805 | 779062 TY-2482_chromosome | B7L5N4                                                                 | Component of SufBCD complex, ATP-binding component of ABC superfamily                                            | Escherichia coli (strain 55989 / EAEC)                                 |
| 91007  | 781302 | 779818 TY-2482_chromosome | B7L5N5                                                                 | Component of SufBCD complex                                                                                      | Escherichia coli (strain 55989 / EAEC)                                 |
| 101838 | 781679 | 781314 TY-2482_chromosome | B7L5N6                                                                 | Fe-S cluster assembly protein                                                                                    | Escherichia coli (strain 55989 / EAEC)                                 |
| r507   | 782073 | 782006 TY-2482_chromosome | ref NC_010473 :1853308-1853375 -  [gene=rydB] [locus_tag=ECDH10B_1819] |                                                                                                                  |                                                                        |
| 61885  | 782926 | 782519 TY-2482_chromosome | B7L5N8                                                                 | Putative esterase (EC 3.1.-.-)                                                                                   | Escherichia coli (strain 55989 / EAEC)                                 |
| 64822  | 785979 | 782926 TY-2482_chromosome | B7L5N9                                                                 | Putative conserved FAD-linked oxidoreductase                                                                     | Escherichia coli (strain 55989 / EAEC)                                 |
| 68713  | 786368 | 787477 TY-2482_chromosome | B7L5P0                                                                 | Putative uncharacterized protein ydiK                                                                            | Escherichia coli (strain 55989 / EAEC)                                 |
| r195   | 787666 | 787770 TY-2482_chromosome | ref NC_010473 :1858967-1859071 -  [gene=rprA] [locus_tag=ECDH10B_1824] |                                                                                                                  |                                                                        |
| 85818  | 787882 | 788262 TY-2482_chromosome | D3GU10                                                                 | Putative uncharacterized protein                                                                                 | Escherichia coli O44:H18 (strain 042 / EAEC)                           |
| 91769  | 788365 | 789576 TY-2482_chromosome | B7L5P2                                                                 | Putative transporter; MFS superfamily                                                                            | Escherichia coli (strain 55989 / EAEC)                                 |
| 99000  | 789806 | 791068 TY-2482_chromosome | B7L5P3                                                                 | Putative transporter                                                                                             | Escherichia coli (strain 55989 / EAEC)                                 |
| 34834  | 791083 | 791946 TY-2482_chromosome | B7L5P4                                                                 | Quinate/shikimate dehydrogenase (EC 1.1.1.282) (NAD-dependent shikimate 5-dehydrogenase 2)                       | Escherichia coli (strain 55989 / EAEC)                                 |
| 29904  | 791980 | 792735 TY-2482_chromosome | B7L5P5                                                                 | 3-dehydroquinate dehydratase (3-dehydroquinase) (EC 4.2.1.10) (Type I DHQase)                                    | Escherichia coli (strain 55989 / EAEC)                                 |
| 94818  | 792882 | 794474 TY-2482_chromosome | B7L5P6                                                                 | Short chain acyl-CoA transferase: fused alpha subunit ; beta subunit                                             | Escherichia coli (strain 55989 / EAEC)                                 |
| 71650  | 794491 | 795639 TY-2482_chromosome | B7L5P7                                                                 | Putative acyl-CoA dehydrogenase                                                                                  | Escherichia coli (strain 55989 / EAEC)                                 |
| 80381  | 796596 | 795688 TY-2482_chromosome | B7L5P8                                                                 | Putative DNA-binding transcriptional regulator                                                                   | Escherichia coli (strain 55989 / EAEC)                                 |
| 115792 | 796813 | 797673 TY-2482_chromosome | D3GU18                                                                 | Putative electron transfer flavoprotein beta subunit                                                             | Escherichia coli O44:H18 (strain 042 / EAEC)                           |
| 111474 | 797696 | 798631 TY-2482_chromosome | B7L6H1                                                                 | Putative electron transfer flavoprotein subunit, FAD-binding                                                     | Escherichia coli (strain 55989 / EAEC)                                 |
| 106486 | 798690 | 799976 TY-2482_chromosome | B7L6H2                                                                 | Putative oxidoreductase subunit with FAD/NAD(P)-binding domain                                                   | Escherichia coli (strain 55989 / EAEC)                                 |
| 77378  | 799976 | 800266 TY-2482_chromosome | B7L6H3                                                                 | Putative 4Fe-4S ferredoxin-type oxidoreductase subunit                                                           | Escherichia coli (strain 55989 / EAEC)                                 |
| 69904  | 800272 | 801969 TY-2482_chromosome | B7L6H4                                                                 | Short chain acyl-CoA synthetase, anaerobic                                                                       | Escherichia coli (strain 55989 / EAEC)                                 |
| 109629 | 804407 | 802032 TY-2482_chromosome | B7L6H5                                                                 | Phosphoenolpyruvate synthase (EC 2.7.9.2)                                                                        | Escherichia coli (strain 55989 / EAEC)                                 |
| 34831  | 804740 | 805570 TY-2482_chromosome | B7L6H6                                                                 | Putative phosphotransferase ydiA (EC 2.7.-.-)                                                                    | Escherichia coli (strain 55989 / EAEC)                                 |
| 95518  | 805730 | 806773 TY-2482_chromosome | B7L6H7                                                                 | Phospho-2-dehydro-3-deoxyheptonate aldolase (EC 2.5.1.54) (3-deoxy-D-arabino-heptulosonate 7-phosphate synthase) | Escherichia coli (strain 55989 / EAEC)                                 |
| 73436  | 806881 | 807096 TY-2482_chromosome | B5YP23                                                                 | Putative uncharacterized protein                                                                                 | Escherichia coli O157:H7 (strain EC4115 / EHEC)                        |
| 34836  | 808539 | 807106 TY-2482_chromosome | B7L6H9                                                                 | UPF0061 protein ydiU                                                                                             | Escherichia coli (strain 55989 / EAEC)                                 |
| 71942  | 809315 | 808605 TY-2482_chromosome | B7L6I0                                                                 | Putative uncharacterized protein ydiV                                                                            | Escherichia coli (strain 55989 / EAEC)                                 |
| 106489 | 810026 | 809565 TY-2482_chromosome | B7L6I1                                                                 | Putative peptidase lipoprotein                                                                                   | Escherichia coli (strain 55989 / EAEC)                                 |
| 30173  | 810853 | 810107 TY-2482_chromosome | B7L6I2                                                                 | Vitamin B12 import ATP-binding protein BtuD (EC 3.6.3.33) (Vitamin B12-transporting ATPase)                      | Escherichia coli (strain 55989 / EAEC)                                 |
| 102809 | 811404 | 810856 TY-2482_chromosome | B7L6I3                                                                 | Glutathione peroxidase                                                                                           | Escherichia coli (strain 55989 / EAEC)                                 |
| 30164  | 812447 | 811470 TY-2482_chromosome | B7L6I4                                                                 | Vitamin B12 import system permease protein BtuC                                                                  | Escherichia coli (strain 55989 / EAEC)                                 |
| 28093  | 813032 | 812640 TY-2482_chromosome | D3QUK6                                                                 | Putative uncharacterized protein                                                                                 | Escherichia coli O55:H7 (strain CB9615 / EPEC)                         |
| 28352  | 814167 | 813046 TY-2482_chromosome | B2U362                                                                 | Integrase                                                                                                        | Shigella boydii serotype 18 (strain CDC 3083-94 / BS512)               |
| 103479 | 814378 | 814070 TY-2482_chromosome | C8TSI7                                                                 | Putative repressor protein C                                                                                     | Escherichia coli O26:H11 (strain 11368 / EHEC)                         |
| 96932  | 814470 | 814745 TY-2482_chromosome | C8U9T4                                                                 | Predicted DNA-binding protein                                                                                    | Escherichia coli O103:H2 (strain 12009 / EHEC)                         |
| 28723  | 814763 | 815098 TY-2482_chromosome | B7U554                                                                 | Predicted protein                                                                                                | Escherichia coli O127:H6 (strain E2348/69 / EPEC)                      |
| 28724  | 815052 | 815396 TY-2482_chromosome | B7L7W7                                                                 | Putative uncharacterized protein                                                                                 | Escherichia coli (strain 55989 / EAEC)                                 |
| 103480 | 815411 | 815650 TY-2482_chromosome | C8TSI1                                                                 | Putative uncharacterized protein                                                                                 | Escherichia coli O26:H11 (strain 11368 / EHEC)                         |
| 24619  | 816162 | 816362 TY-2482_chromosome | D2TSK5                                                                 | Hypothetical prophage protein                                                                                    | Citrobacter rodentium (strain ICC168) (Citrobacter freundii biotype 4) |
| 91787  | 816305 | 816604 TY-2482_chromosome | B7L7X0                                                                 | Putative uncharacterized protein                                                                                 | Escherichia coli (strain 55989 / EAEC)                                 |
| 106231 | 816604 | 816900 TY-2482_chromosome | B5YRR7                                                                 | Putative uncharacterized protein                                                                                 | Escherichia coli O157:H7 (strain EC4115 / EHEC)                        |
| 9681   | 816915 | 817529 TY-2482_chromosome | B3V106                                                                 | Predicted protein                                                                                                | Escherichia coli O111:H-                                               |
| 101065 | 817529 | 817915 TY-2482_chromosome | C8TTF9                                                                 | Conserved predicted protein                                                                                      | Escherichia coli O26:H11 (strain 11368 / EHEC)                         |
| 75545  | 818005 | 820752 TY-2482_chromosome | B7L7X2                                                                 | Putative phage replication protein                                                                               | Escherichia coli (strain 55989 / EAEC)                                 |
| 116075 | 820832 | 821788 TY-2482_chromosome | B7L7X3                                                                 | Plasmid segregation protein parM (Protein stbA) (ParA locus 36 kDa protein)                                      | Escherichia coli (strain 55989 / EAEC)                                 |
| 27641  | 821796 | 822107 TY-2482_chromosome | B7L7X4                                                                 | Putative stability/partitioning protein phage encoded (Putative plasmid partition protein) (Modular protein)     | Escherichia coli (strain 55989 / EAEC)                                 |
| 28371  | 822130 | 822558 TY-2482_chromosome | B7L7X5                                                                 | Putative uncharacterized protein                                                                                 | Escherichia coli (strain 55989 / EAEC)                                 |
| 84441  | 822542 | 822823 TY-2482_chromosome | B7L7X6                                                                 | Putative uncharacterized protein                                                                                 | Escherichia coli (strain 55989 / EAEC)                                 |
| 27139  | 823235 | 822852 TY-2482_chromosome | B7L7X7                                                                 | Putative uncharacterized protein                                                                                 | Escherichia coli (strain 55989 / EAEC)                                 |
| 73603  | 824384 | 823341 TY-2482_chromosome | B7L7X8                                                                 | Portal capsid protein Q (GpQ)                                                                                    | Escherichia coli (strain 55989 / EAEC)                                 |
| 70107  | 826135 | 824387 TY-2482_chromosome | B7L7X9                                                                 | Terminase, ATPase subunit (GpP)                                                                                  | Escherichia coli (strain 55989 / EAEC)                                 |
| 28019  | 826257 | 827123 TY-2482_chromosome | B7L7Y0                                                                 | Capsid scaffolding protein O                                                                                     | Escherichia coli (strain 55989 / EAEC)                                 |
| 94311  | 827150 | 828199 TY-2482_chromosome | B7L7Y2                                                                 | Major capsid protein (GpN)                                                                                       | Escherichia coli (strain 55989 / EAEC)                                 |
| 115199 | 828248 | 829045 TY-2482_chromosome | C8TSK3                                                                 | Putative terminase small subunit                                                                                 | Escherichia coli O26:H11 (strain 11368 / EHEC)                         |
| 112395 | 829150 | 829641 TY-2482_chromosome | C8TSK4                                                                 | Putative capsid completion protein                                                                               | Escherichia coli O26:H11 (strain 11368 / EHEC)                         |
| 29536  | 829628 | 830167 TY-2482_chromosome | B7L7Y5                                                                 | Putative uncharacterized protein                                                                                 | Escherichia coli (strain 55989 / EAEC)                                 |
| 24669  | 830412 | 830960 TY-2482_chromosome | B7L7Y8                                                                 | Putative uncharacterized protein                                                                                 | Escherichia coli (strain 55989 / EAEC)                                 |
| 25009  | 831102 | 832979 TY-2482_chromosome | B7L7Y9                                                                 | Putative uncharacterized protein                                                                                 | Escherichia coli (strain 55989 / EAEC)                                 |
| 78251  | 833457 | 834098 TY-2482_chromosome | C8UBF1                                                                 | Predicted tail completion protein                                                                                | Escherichia coli O111:H- (strain 11128 / EHEC)                         |
| 59606  | 834098 | 834676 TY-2482_chromosome | C8TTH7                                                                 | Putative baseplate assembly protein                                                                              | Escherichia coli O26:H11 (strain 11368 / EHEC)                         |
| 64803  | 834676 | 835023 TY-2482_chromosome | B7L7Z3                                                                 | Baseplate assembly protein W                                                                                     | Escherichia coli (strain 55989 / EAEC)                                 |
| 68751  | 835030 | 835923 TY-2482_chromosome | C8TTH9                                                                 | Putative baseplate assembly protein                                                                              | Escherichia coli O26:H11 (strain 11368 / EHEC)                         |
| 69408  | 835919 | 836446 TY-2482_chromosome | C8UBF5                                                                 | Putative phage tail protein                                                                                      | Escherichia coli O111:H- (strain 11128 / EHEC)                         |
| 82394  | 836452 | 838581 TY-2482_chromosome | C8TTI1                                                                 | Probable side tail fiber protein                                                                                 | Escherichia coli O26:H11 (strain 11368 / EHEC)                         |

|        |        |                           |        |                                                                                                                  |                                                  |
|--------|--------|---------------------------|--------|------------------------------------------------------------------------------------------------------------------|--------------------------------------------------|
| 101496 | 838584 | 839159 TY-2482_chromosome | C8UR26 | Putative tail fiber assembly protein                                                                             | Escherichia coli O111:H- (strain 11128 / EHEC)   |
| 18343  | 839811 | 839209 TY-2482_chromosome | E7HLF3 | Bacterial transferase hexapeptide family protein                                                                 | Escherichia coli EPECa14                         |
| 60807  | 840429 | 839938 TY-2482_chromosome | B7L729 | Putative tail fiber protein                                                                                      | Escherichia coli (strain 55989 / EAEC)           |
| 61887  | 843252 | 840439 TY-2482_chromosome | B7L800 | Putative tail protein (Modular protein)                                                                          | Escherichia coli (strain 55989 / EAEC)           |
| 86279  | 843466 | 843233 TY-2482_chromosome | C8TSM0 | Putative tail protein                                                                                            | Escherichia coli O26:H11 (strain 11368 / EHEC)   |
| 100155 | 843759 | 843397 TY-2482_chromosome | C8U9X1 | Putative tail protein                                                                                            | Escherichia coli O103:H2 (strain 12009 / EHEC)   |
| 59829  | 844326 | 843817 TY-2482_chromosome | C8UBG3 | Putative tail tube protein                                                                                       | Escherichia coli O111:H- (strain 11128 / EHEC)   |
| 107862 | 845510 | 844329 TY-2482_chromosome | B7L804 | Major tail sheath protein FI                                                                                     | Escherichia coli (strain 55989 / EAEC)           |
| 26265  | 845536 | 846774 TY-2482_chromosome | B7L805 | Gene late control D protein                                                                                      | Escherichia coli (strain 55989 / EAEC)           |
| 2662   | 848293 | 849273 TY-2482_chromosome | P0CE57 | Transposase insH for insertion sequence element ISSR                                                             | Escherichia coli (strain K12)                    |
| 93414  | 849470 | 849727 TY-2482_chromosome | C8U9X6 | Predicted regulatory protein                                                                                     | Escherichia coli O103:H2 (strain 12009 / EHEC)   |
| 27253  | 849989 | 849730 TY-2482_chromosome | Q1RE18 | Putative uncharacterized protein                                                                                 | Escherichia coli (strain UTI89 / UPEC)           |
| 31599  | 850662 | 850366 TY-2482_chromosome | B7L615 | Integration host factor subunit alpha (IHf-alpha)                                                                | Escherichia coli (strain 55989 / EAEC)           |
| 113960 | 853054 | 850670 TY-2482_chromosome | B7L616 | Phenylalanine tRNA synthetase, beta subunit (EC 6.1.1.20)                                                        | Escherichia coli (strain 55989 / EAEC)           |
| 34101  | 854052 | 853072 TY-2482_chromosome | B7L617 | Phenylalanyl-tRNA synthetase alpha chain (EC 6.1.1.20) (Phenylalanine--tRNA ligase alpha chain) (PheRS)          | Escherichia coli (strain 55989 / EAEC)           |
| 33492  | 854858 | 854505 TY-2482_chromosome | B7L619 | S0S ribosomal protein L20                                                                                        | Escherichia coli (strain 55989 / EAEC)           |
| 25514  | 854980 | 855588 TY-2482_chromosome | A1ABQ1 | Putative uncharacterized protein                                                                                 | Escherichia coli O1:K1 / APEC                    |
| 34175  | 857679 | 855754 TY-2482_chromosome | B7L612 | Threonyl-tRNA synthetase (EC 6.1.1.3) (Threonine--tRNA ligase) (ThrRS)                                           | Escherichia coli (strain 55989 / EAEC)           |
| 110179 | 858203 | 860098 TY-2482_chromosome | Q8XE25 | Putative uncharacterized protein                                                                                 | Escherichia coli O157:H7                         |
| 73696  | 861195 | 860440 TY-2482_chromosome | B7L615 | Putative uncharacterized protein ydiY                                                                            | Escherichia coli (strain 55989 / EAEC)           |
| 110583 | 861482 | 862408 TY-2482_chromosome | B7L616 | G-phosphofructokinase II (EC 2.7.1.11)                                                                           | Escherichia coli (strain 55989 / EAEC)           |
| 26007  | 862817 | 862443 TY-2482_chromosome | Q1RB71 | Putative uncharacterized protein                                                                                 | Escherichia coli (strain UTI89 / UPEC)           |
| 91865  | 862908 | 863765 TY-2482_chromosome | B7L618 | Putative phosphotransferase/kinase                                                                               | Escherichia coli (strain 55989 / EAEC)           |
| 90297  | 864345 | 863812 TY-2482_chromosome | B7L619 | Putative uncharacterized protein yniB                                                                            | Escherichia coli (strain 55989 / EAEC)           |
| 66226  | 864492 | 865157 TY-2482_chromosome | B7L6K0 | Putative phosphoglycolate phosphatase                                                                            | Escherichia coli (strain 55989 / EAEC)           |
| 82315  | 865311 | 865910 TY-2482_chromosome | D3GVE1 | Putative membrane-bound metal-dependent hydrolase                                                                | Escherichia coli O44:H18 (strain 042 / EAEC)     |
| 100912 | 866046 | 867434 TY-2482_chromosome | B7L6K2 | Putative cation-acid symporter                                                                                   | Escherichia coli (strain 55989 / EAEC)           |
| 17952  | 867668 | 867444 TY-2482_chromosome | D8E437 | Conserved domain protein                                                                                         | Escherichia coli MS 119-7                        |
| 2663   | 867700 | 868680 TY-2482_chromosome | P0CE57 | Transposase insH for insertion sequence element ISSR                                                             | Escherichia coli (strain K12)                    |
| 70410  | 869455 | 868724 TY-2482_chromosome | C6UW71 | Predicted protein                                                                                                | Escherichia coli O157:H7 (strain TW14359 / EHEC) |
| 98983  | 869995 | 869735 TY-2482_chromosome | B7L6K5 | Cell division activator CedA                                                                                     | Escherichia coli (strain 55989 / EAEC)           |
| 81109  | 870178 | 872436 TY-2482_chromosome | B7L6K6 | Catalase (EC 1.11.1.6)                                                                                           | Escherichia coli (strain 55989 / EAEC)           |
| 30291  | 873244 | 872489 TY-2482_chromosome | B7L6K7 | UPF0249 protein ChbG                                                                                             | Escherichia coli (strain 55989 / EAEC)           |
| 73824  | 874609 | 873260 TY-2482_chromosome | B7L6K8 | Cryptic phospho-beta-glucosidase, NAD(P)-binding (EC 3.2.1.86)                                                   | Escherichia coli (strain 55989 / EAEC)           |
| 77515  | 875556 | 874717 TY-2482_chromosome | B7L6K9 | DNA-binding transcriptional dual regulator                                                                       | Escherichia coli (strain 55989 / EAEC)           |
| 88482  | 875914 | 875567 TY-2482_chromosome | B7L6L0 | N,N'-diacetylchitobiose-specific enzyme IIA component of PTS (EC 2.7.1.69)                                       | Escherichia coli (strain 55989 / EAEC)           |
| 106343 | 877323 | 875968 TY-2482_chromosome | B7L6L1 | N,N'-diacetylchitobiose-specific enzyme IIC component of PTS (EC 2.7.1.69)                                       | Escherichia coli (strain 55989 / EAEC)           |
| 77516  | 877728 | 877411 TY-2482_chromosome | B7L6L2 | N,N'-diacetylchitobiose-specific enzyme IIB component of PTS (EC 2.7.1.69)                                       | Escherichia coli (strain 55989 / EAEC)           |
| 24991  | 878009 | 877752 TY-2482_chromosome | Q1RB56 | Putative uncharacterized protein                                                                                 | Escherichia coli (strain UTI89 / UPEC)           |
| 82451  | 878365 | 878030 TY-2482_chromosome | B7L6L3 | DNA-binding transcriptional activator                                                                            | Escherichia coli (strain 55989 / EAEC)           |
| 32595  | 878567 | 879391 TY-2482_chromosome | B7L6L4 | NH(3)-dependent NAD(+) synthetase (EC 6.3.1.5)                                                                   | Escherichia coli (strain 55989 / EAEC)           |
| 95376  | 879624 | 880508 TY-2482_chromosome | B7L6L5 | Endonuclease of nucleotide excision repair (EC 3.1.25.-)                                                         | Escherichia coli (strain 55989 / EAEC)           |
| 20446  | 879702 | 879481 TY-2482_chromosome | D8AB29 | Putative uncharacterized protein                                                                                 | Escherichia coli MS 21-1                         |
| 101588 | 881109 | 880474 TY-2482_chromosome | D3GVF5 | Putative uncharacterized protein                                                                                 | Escherichia coli O44:H18 (strain 042 / EAEC)     |
| 64178  | 881734 | 881252 TY-2482_chromosome | B7L6L7 | Envelope stress induced periplasmic protein                                                                      | Escherichia coli (strain 55989 / EAEC)           |
| 30013  | 883032 | 882067 TY-2482_chromosome | B7L6L8 | Succinylglutamate desuccinylase (EC 3.5.1.96)                                                                    | Escherichia coli (strain 55989 / EAEC)           |
| 29950  | 884368 | 883028 TY-2482_chromosome | B7L619 | N-succinylarginine dihydrolase (EC 3.5.3.23)                                                                     | Escherichia coli (strain 55989 / EAEC)           |
| 29979  | 885843 | 884368 TY-2482_chromosome | B7L6M0 | N-succinylglutamate 5-semialdehyde dehydrogenase (EC 1.2.1.71) (Succinylglutamic semialdehyde dehydrogenase) (†) | Escherichia coli (strain 55989 / EAEC)           |
| 29946  | 886874 | 885843 TY-2482_chromosome | B7L6M1 | Arginine N-succinyltransferase (AST) (EC 2.3.1.109) (AOST)                                                       | Escherichia coli (strain 55989 / EAEC)           |
| 29954  | 888091 | 886874 TY-2482_chromosome | B7L6M2 | Succinylornithine transaminase (EC 2.6.1.81) (Succinylornithine aminotransferase)                                | Escherichia coli (strain 55989 / EAEC)           |
| 114142 | 888537 | 889340 TY-2482_chromosome | B7L6M3 | Exonuclease III (EC 3.1.11.2)                                                                                    | Escherichia coli (strain 55989 / EAEC)           |
| 89490  | 889462 | 890217 TY-2482_chromosome | D3GVG3 | Putative membrane protein                                                                                        | Escherichia coli O44:H18 (strain 042 / EAEC)     |
| 114001 | 890225 | 890899 TY-2482_chromosome | B7L6M5 | Putative uncharacterized protein ydjY                                                                            | Escherichia coli (strain 55989 / EAEC)           |
| 75222  | 890916 | 891620 TY-2482_chromosome | B7L6M6 | Putative uncharacterized protein ydjZ                                                                            | Escherichia coli (strain 55989 / EAEC)           |
| 66239  | 891623 | 892168 TY-2482_chromosome | B7L6M7 | Putative uncharacterized protein ynjA                                                                            | Escherichia coli (strain 55989 / EAEC)           |
| 108279 | 892181 | 893344 TY-2482_chromosome | B7L6M8 | Putative uncharacterized protein ynjB                                                                            | Escherichia coli (strain 55989 / EAEC)           |
| 68376  | 893365 | 894852 TY-2482_chromosome | B7L6M9 | Fused putative transporter subunits of ABC superfamily: membrane components                                      | Escherichia coli (strain 55989 / EAEC)           |
| 59200  | 894855 | 895505 TY-2482_chromosome | B7L6N0 | Putative sulfate/thiosulfate transporter subunit: ATP-binding component of ABC superfamily transporter           | Escherichia coli (strain 55989 / EAEC)           |
| 68115  | 895575 | 896879 TY-2482_chromosome | B7L6N1 | Putative exported thiosulfate sulfur transferase / thiosulfate binding protein                                   | Escherichia coli (strain 55989 / EAEC)           |
| 100570 | 897511 | 896894 TY-2482_chromosome | C8TSS4 | Predicted phosphatidyl transferase, inner membrane protein                                                       | Escherichia coli O26:H11 (strain 11368 / EHEC)   |
| 76055  | 897598 | 898002 TY-2482_chromosome | B7L6N3 | Pyrimidine (Deoxy)nucleoside triphosphate pyrophosphohydrolase (EC 3.6.1.-)                                      | Escherichia coli (strain 55989 / EAEC)           |
| 85280  | 898243 | 897974 TY-2482_chromosome | C8TSS6 | Conserved predicted protein                                                                                      | Escherichia coli O26:H11 (strain 11368 / EHEC)   |
| 81110  | 898479 | 899819 TY-2482_chromosome | B7L6N4 | Glutamate dehydrogenase, NADP-specific (EC 1.4.1.4)                                                              | Escherichia coli (strain 55989 / EAEC)           |
| 106441 | 900979 | 899942 TY-2482_chromosome | B7L6N5 | Putative uncharacterized protein ynjI                                                                            | Escherichia coli (strain 55989 / EAEC)           |

|        |        |                           |        |                                                                                                      |                                                   |
|--------|--------|---------------------------|--------|------------------------------------------------------------------------------------------------------|---------------------------------------------------|
| 114002 | 903116 | 901110 TY-2482_chromosome | B7L6N6 | DNA topoisomerase (EC 5.99.1.2)                                                                      | Escherichia coli (strain 55989 / EAEC)            |
| 65774  | 904164 | 903124 TY-2482_chromosome | B7L6N7 | Selenide, water dikinase (EC 2.7.9.3) (Selenium donor protein) (Selenophosphate synthase)            | Escherichia coli (strain 55989 / EAEC)            |
| 68716  | 904847 | 904284 TY-2482_chromosome | D3GVH9 | Putative nitroreductase                                                                              | Escherichia coli O44:H18 (strain 042 / EAEC)      |
| 91765  | 904993 | 906846 TY-2482_chromosome | B7L6P1 | Protease IV (Signal peptide peptidase) (EC 3.4.-.-)                                                  | Escherichia coli (strain 55989 / EAEC)            |
| 106345 | 907016 | 908029 TY-2482_chromosome | B7L6P2 | Cytoplasmic L-asparaginase I (EC 3.5.1.1)                                                            | Escherichia coli (strain 55989 / EAEC)            |
| 114143 | 908043 | 908681 TY-2482_chromosome | B7L6P3 | Nicotinamidase/pyrazinamidase (EC 3.5.1.-.) (EC 3.5.1.19)                                            | Escherichia coli (strain 55989 / EAEC)            |
| 81111  | 910135 | 908780 TY-2482_chromosome | B7L6P4 | Putative transporter; MFS superfamily                                                                | Escherichia coli (strain 55989 / EAEC)            |
| 91859  | 911010 | 910255 TY-2482_chromosome | B7L6P5 | Putative DNA-binding transcriptional regulator                                                       | Escherichia coli (strain 55989 / EAEC)            |
| 102694 | 912127 | 911150 TY-2482_chromosome | B7L6P6 | Putative oxidoreductase; similar to aldo/keto reductase                                              | Escherichia coli (strain 55989 / EAEC)            |
| 102696 | 913084 | 912140 TY-2482_chromosome | B7L6P7 | Putative sugar kinase                                                                                | Escherichia coli (strain 55989 / EAEC)            |
| 87132  | 913925 | 913092 TY-2482_chromosome | B7L6P8 | Putative aldolase                                                                                    | Escherichia coli (strain 55989 / EAEC)            |
| 66327  | 914923 | 913949 TY-2482_chromosome | B7L6P9 | Putative iditol dehydrogenase (EC 1.1.1.14)                                                          | Escherichia coli (strain 55989 / EAEC)            |
| 91766  | 916385 | 915009 TY-2482_chromosome | B7L6Q0 | Putative transporter; MFS superfamily                                                                | Escherichia coli (strain 55989 / EAEC)            |
| 98984  | 917488 | 916415 TY-2482_chromosome | B7L6Q1 | Putative oxidoreductase, Zn-dependent and NAD(P)-binding                                             | Escherichia coli (strain 55989 / EAEC)            |
| 106346 | 918130 | 917861 TY-2482_chromosome | B7L6Q2 | Putative uncharacterized protein yeaC                                                                | Escherichia coli (strain 55989 / EAEC)            |
| 32498  | 918585 | 918175 TY-2482_chromosome | B7L6Q3 | Peptide methionine sulfoxide reductase MsrB (EC 1.8.4.12) (Peptide-methionine (R)-S-oxide reductase) | Escherichia coli (strain 55989 / EAEC)            |
| 65527  | 918927 | 919919 TY-2482_chromosome | B7L6Q4 | Glyceraldehyde-3-phosphate dehydrogenase A (EC 1.2.1.12)                                             | Escherichia coli (strain 55989 / EAEC)            |
| 97400  | 919985 | 920887 TY-2482_chromosome | D3GVJ4 | Putative aldose 1-epimerase                                                                          | Escherichia coli O44:H18 (strain 042 / EAEC)      |
| 77517  | 921795 | 920944 TY-2482_chromosome | B7L6Q6 | Putative oxidoreductase                                                                              | Escherichia coli (strain 55989 / EAEC)            |
| 94277  | 922631 | 921888 TY-2482_chromosome | B7L6Q7 | Scaffolding protein for murein synthesizing machinery                                                | Escherichia coli (strain 55989 / EAEC)            |
| 72201  | 923067 | 924998 TY-2482_chromosome | B7L6Q8 | Putative uncharacterized protein yeaG                                                                | Escherichia coli (strain 55989 / EAEC)            |
| 34839  | 925114 | 926394 TY-2482_chromosome | B7L6Q9 | UPF0229 protein yeaH                                                                                 | Escherichia coli (strain 55989 / EAEC)            |
| 98307  | 926544 | 928016 TY-2482_chromosome | B7L6R0 | Putative diguanylate cyclase                                                                         | Escherichia coli (strain 55989 / EAEC)            |
| 84570  | 928200 | 929687 TY-2482_chromosome | B7L6R1 | Putative diguanylate cyclase                                                                         | Escherichia coli (strain 55989 / EAEC)            |
| 77518  | 929733 | 930233 TY-2482_chromosome | B7L6R2 | Putative uncharacterized protein yeaK                                                                | Escherichia coli (strain 55989 / EAEC)            |
| 21577  | 930330 | 930515 TY-2482_chromosome | D8B8Y4 | Putative uncharacterized protein                                                                     | Escherichia coli MS 175-1                         |
| 65750  | 931739 | 930921 TY-2482_chromosome | B7L6R5 | Putative DNA-binding transcriptional regulator                                                       | Escherichia coli (strain 55989 / EAEC)            |
| 102697 | 931836 | 933014 TY-2482_chromosome | B7L6R6 | Putative transporter; MFS superfamily                                                                | Escherichia coli (strain 55989 / EAEC)            |
| 98987  | 933072 | 933416 TY-2482_chromosome | B7L6R7 | Putative uncharacterized protein yeaO                                                                | Escherichia coli (strain 55989 / EAEC)            |
| 98988  | 933695 | 933444 TY-2482_chromosome | B7L6R8 | Putative uncharacterized protein yoaf                                                                | Escherichia coli (strain 55989 / EAEC)            |
| 66332  | 933878 | 934900 TY-2482_chromosome | B7L6R9 | Putative diguanylate cyclase                                                                         | Escherichia coli (strain 55989 / EAEC)            |
| 59201  | 935418 | 935173 TY-2482_chromosome | B7L6S0 | Putative uncharacterized protein yeaQ                                                                | Escherichia coli (strain 55989 / EAEC)            |
| 82503  | 935615 | 935433 TY-2482_chromosome | B7L6S1 | Putative uncharacterized protein                                                                     | Escherichia coli (strain 55989 / EAEC)            |
| 87771  | 936853 | 935648 TY-2482_chromosome | B7L6S2 | Putative transposase                                                                                 | Escherichia coli (strain 55989 / EAEC)            |
| 27078  | 936876 | 937820 TY-2482_chromosome | A7ZMR8 | Transposase, IS605 family                                                                            | Escherichia coli O139:H28 (strain E24377A / ETEC) |
| 82452  | 938670 | 938035 TY-2482_chromosome | B7L6S6 | Putative neutral amino-acid efflux system                                                            | Escherichia coli (strain 55989 / EAEC)            |
| 73826  | 939720 | 938800 TY-2482_chromosome | B7L6S7 | Putative DNA-binding transcriptional regulator                                                       | Escherichia coli (strain 55989 / EAEC)            |
| 114144 | 939823 | 940905 TY-2482_chromosome | B7L6S8 | Putative tartrate dehydrogenase                                                                      | Escherichia coli (strain 55989 / EAEC)            |
| 114146 | 941324 | 942766 TY-2482_chromosome | B7L6S9 | Putative transporter                                                                                 | Escherichia coli (strain 55989 / EAEC)            |
| 67972  | 942801 | 943922 TY-2482_chromosome | B7L6T0 | Putative 2Fe-2S cluster-containing dioxygenase subunit                                               | Escherichia coli (strain 55989 / EAEC)            |
| 104336 | 943981 | 944943 TY-2482_chromosome | B7L6T1 | Putative dioxygenase subunit                                                                         | Escherichia coli (strain 55989 / EAEC)            |
| 69038  | 946127 | 945003 TY-2482_chromosome | B7L6T2 | Ribonuclease D (EC 3.1.26.3)                                                                         | Escherichia coli (strain 55989 / EAEC)            |
| 87059  | 947882 | 946200 TY-2482_chromosome | B7L6T3 | Acyl-CoA synthetase (Long-chain-fatty-acid--CoA ligase) (EC 6.2.1.3)                                 | Escherichia coli (strain 55989 / EAEC)            |
| 76153  | 948668 | 948090 TY-2482_chromosome | B7L6T4 | Putative outer membrane-associated lipoprotein                                                       | Escherichia coli (strain 55989 / EAEC)            |
| 114150 | 949403 | 948711 TY-2482_chromosome | B7L6T5 | Putative peptidase                                                                                   | Escherichia coli (strain 55989 / EAEC)            |
| 99041  | 951371 | 949464 TY-2482_chromosome | B7L6T6 | Putative ATP-dependent helicase                                                                      | Escherichia coli (strain 55989 / EAEC)            |
| 26504  | 951790 | 951407 TY-2482_chromosome | A7ZMT0 | Putative uncharacterized protein                                                                     | Escherichia coli O139:H28 (strain E24377A / ETEC) |
| 93521  | 952210 | 952566 TY-2482_chromosome | B7L6T8 | Putative uncharacterized protein yoaC                                                                | Escherichia coli (strain 55989 / EAEC)            |
| 102761 | 952942 | 954300 TY-2482_chromosome | B7L6U0 | Aminodeoxychorismate synthase, subunit I (EC 2.6.1.85)                                               | Escherichia coli (strain 55989 / EAEC)            |
| 32736  | 954307 | 954882 TY-2482_chromosome | B7L6U1 | Uncharacterized Nudix hydrolase nudL (EC 3.6.1.-)                                                    | Escherichia coli (strain 55989 / EAEC)            |
| 76159  | 955069 | 956430 TY-2482_chromosome | B7L6U2 | L-serine deaminase I (EC 4.3.1.17)                                                                   | Escherichia coli (strain 55989 / EAEC)            |
| 72218  | 956564 | 958159 TY-2482_chromosome | B7L6U3 | Putative cyclic di-GMP phosphodiesterase                                                             | Escherichia coli (strain 55989 / EAEC)            |
| 66389  | 959722 | 958169 TY-2482_chromosome | B7L6U4 | Putative membrane protein fused with conserved domain                                                | Escherichia coli (strain 55989 / EAEC)            |
| 111011 | 959919 | 959713 TY-2482_chromosome | C8UBR5 | Conserved predicted protein                                                                          | Escherichia coli O111:H- (strain 11128 / EHEC)    |
| 106406 | 960185 | 961153 TY-2482_chromosome | B7L6U5 | Fused mannose-specific PTS enzymes: IIA component ; IIB component (EC 2.7.1.69)                      | Escherichia coli (strain 55989 / EAEC)            |
| 17120  | 960214 | 960023 TY-2482_chromosome | D7X960 | Conserved domain protein                                                                             | Escherichia coli MS 198-1                         |
| 83334  | 961219 | 962016 TY-2482_chromosome | B7L6U6 | Mannose-specific enzyme IIC component of PTS                                                         | Escherichia coli (strain 55989 / EAEC)            |
| 77293  | 962023 | 962880 TY-2482_chromosome | B7L6U7 | Mannose-specific enzyme IID component of PTS                                                         | Escherichia coli (strain 55989 / EAEC)            |
| 35037  | 962938 | 963393 TY-2482_chromosome | B7L6U8 | UPF0266 membrane protein yobD                                                                        | Escherichia coli (strain 55989 / EAEC)            |
| 27418  | 963583 | 963825 TY-2482_chromosome | B7L6U9 | Putative uncharacterized protein                                                                     | Escherichia coli (strain 55989 / EAEC)            |
| 34849  | 963825 | 964388 TY-2482_chromosome | B7L6V0 | UPF0059 membrane protein yebN                                                                        | Escherichia coli (strain 55989 / EAEC)            |
| 99042  | 965197 | 964391 TY-2482_chromosome | B7L6V1 | 23S rRNA m1G745 methyltransferase (EC 2.1.1.51)                                                      | Escherichia coli (strain 55989 / EAEC)            |
| 24490  | 965690 | 965936 TY-2482_chromosome | A1ABZ1 | Putative uncharacterized protein                                                                     | Escherichia coli O1:K1 / APEC                     |
| 27255  | 966651 | 966346 TY-2482_chromosome | Q1RAW4 | Putative uncharacterized protein                                                                     | Escherichia coli (strain UT89 / UPEC)             |

|        |         |                            |               |                                                                                                                                                        |                                                  |
|--------|---------|----------------------------|---------------|--------------------------------------------------------------------------------------------------------------------------------------------------------|--------------------------------------------------|
| 81126  | 967062  | 967298 TY-2482_chromosome  | B7L6V6        | Putative uncharacterized protein yobH                                                                                                                  | Escherichia coli (strain 55989 / EAEC)           |
| 114568 | 968235  | 967447 TY-2482_chromosome  | C8UBS7        | Predicted DNA-binding transcriptional regulator                                                                                                        | Escherichia coli O111:H- (strain 11128 / EHEC)   |
| 91782  | 968412  | 969782 TY-2482_chromosome  | B7L7N0        | Putative transporter; MFS superfamily                                                                                                                  | Escherichia coli (strain 55989 / EAEC)           |
| 31561  | 970712  | 969834 TY-2482_chromosome  | B7L7N1        | Protease HtpX (EC 3.4.24.-) (Heat shock protein HtpX)                                                                                                  | Escherichia coli (strain 55989 / EAEC)           |
| 73601  | 972952  | 970907 TY-2482_chromosome  | B7L7N2        | Carboxy-terminal protease for penicillin-binding protein 3 (EC 3.4.21.102)                                                                             | Escherichia coli (strain 55989 / EAEC)           |
| 33081  | 973670  | 972975 TY-2482_chromosome  | B7L7N3        | ProP effector                                                                                                                                          | Escherichia coli (strain 55989 / EAEC)           |
| 110541 | 974318  | 973770 TY-2482_chromosome  | B7L7N4        | Putative uncharacterized protein yebR                                                                                                                  | Escherichia coli (strain 55989 / EAEC)           |
| 66356  | 974394  | 975674 TY-2482_chromosome  | B7L7N5        | Putative uncharacterized protein yebS                                                                                                                  | Escherichia coli (strain 55989 / EAEC)           |
| 116094 | 975646  | 978276 TY-2482_chromosome  | B7L7N6        | Putative uncharacterized protein yebT                                                                                                                  | Escherichia coli (strain 55989 / EAEC)           |
| 33796  | 978359  | 979795 TY-2482_chromosome  | B7L7N7        | Ribosomal RNA small subunit methyltransferase F (EC 2.1.1.178) (16S rRNA m5C1407 methyltransferase) (rRNA (cyto:Escherichia coli (strain 55989 / EAEC) |                                                  |
| 81122  | 979916  | 980149 TY-2482_chromosome  | B7L7N8        | Putative uncharacterized protein yebV                                                                                                                  | Escherichia coli (strain 55989 / EAEC)           |
| 86871  | 980173  | 980445 TY-2482_chromosome  | B7L7N9        | Putative uncharacterized protein yebW                                                                                                                  | Escherichia coli (strain 55989 / EAEC)           |
| 75966  | 981105  | 980452 TY-2482_chromosome  | B7L7P0        | Serine/threonine-specific protein phosphatase 1 (EC 3.1.3.16)                                                                                          | Escherichia coli (strain 55989 / EAEC)           |
| r101   | 981202  | 981450 TY-2482_chromosome  | ref NC_010473 | :2011661-2011909 -  [gene=ryeA] [locus_tag=ECDH10B_1978]                                                                                               |                                                  |
| 90136  | 981842  | 981504 TY-2482_chromosome  | B7L7P2        | Putative uncharacterized protein yebY                                                                                                                  | Escherichia coli (strain 55989 / EAEC)           |
| 91783  | 982727  | 981858 TY-2482_chromosome  | B7L7P3        | Putative uncharacterized protein yebZ                                                                                                                  | Escherichia coli (strain 55989 / EAEC)           |
| 59011  | 983105  | 982734 TY-2482_chromosome  | B7L7P4        | Putative uncharacterized protein yobA                                                                                                                  | Escherichia coli (strain 55989 / EAEC)           |
| 90073  | 983244  | 983471 TY-2482_chromosome  | B7L7P5        | DNA polymerase III, theta subunit (EC 2.7.7.7)                                                                                                         | Escherichia coli (strain 55989 / EAEC)           |
| 84439  | 983576  | 984229 TY-2482_chromosome  | B7L7P6        | Putative uncharacterized protein yobB                                                                                                                  | Escherichia coli (strain 55989 / EAEC)           |
| 77573  | 984256  | 984915 TY-2482_chromosome  | B7L7P7        | DNA exonuclease X (EC 3.1.11.-)                                                                                                                        | Escherichia coli (strain 55989 / EAEC)           |
| 90081  | 986975  | 984918 TY-2482_chromosome  | B7L7P8        | Protease II (EC 3.4.21.83)                                                                                                                             | Escherichia coli (strain 55989 / EAEC)           |
| 95425  | 987843  | 987187 TY-2482_chromosome  | B7L7P9        | Putative uncharacterized protein yebE                                                                                                                  | Escherichia coli (strain 55989 / EAEC)           |
| 12478  | 988050  | 988253 TY-2482_chromosome  | D6JAC7        | Predicted protein                                                                                                                                      | Escherichia coli B354                            |
| 81123  | 988538  | 988173 TY-2482_chromosome  | B7L7Q0        | Protein yebF                                                                                                                                           | Escherichia coli (strain 55989 / EAEC)           |
| 66358  | 988883  | 988596 TY-2482_chromosome  | B7L7Q1        | Putative uncharacterized protein yebG                                                                                                                  | Escherichia coli (strain 55989 / EAEC)           |
| 72735  | 989017  | 990192 TY-2482_chromosome  | B7L7Q2        | Phosphoribosylglycinamide formyltransferase 2 (EC 2.7.2.1)                                                                                             | Escherichia coli (strain 55989 / EAEC)           |
| 88204  | 990892  | 990254 TY-2482_chromosome  | B7L7Q3        | Multifunctional 2-keto-3-deoxygluconate 6-phosphate aldolase and 2-keto-4-hydroxyglutarate aldolase and oxalolase                                      | Escherichia coli (strain 55989 / EAEC)           |
| 83699  | 992740  | 990932 TY-2482_chromosome  | B7L7Q4        | 6-phosphogluconate dehydratase (EC 4.2.1.12)                                                                                                           | Escherichia coli (strain 55989 / EAEC)           |
| 83457  | 994450  | 992978 TY-2482_chromosome  | B7L7Q5        | Glucose-6-phosphate 1-dehydrogenase (EC 1.1.1.49)                                                                                                      | Escherichia coli (strain 55989 / EAEC)           |
| 66240  | 994788  | 995654 TY-2482_chromosome  | B7L7Q6        | Putative DNA-binding transcriptional regulator                                                                                                         | Escherichia coli (strain 55989 / EAEC)           |
| 70104  | 995785  | 997224 TY-2482_chromosome  | B7L7Q7        | Pyruvate kinase (EC 2.7.1.40)                                                                                                                          | Escherichia coli (strain 55989 / EAEC)           |
| 61651  | 998329  | 997361 TY-2482_chromosome  | B7L7Q8        | Myristoyl-acyl carrier protein (ACP)-dependent acyltransferase (EC 2.3.1.-)                                                                            | Escherichia coli (strain 55989 / EAEC)           |
| 91784  | 999771  | 998452 TY-2482_chromosome  | B7L7Q9        | Putative metalloproteinase                                                                                                                             | Escherichia coli (strain 55989 / EAEC)           |
| 104789 | 1000719 | 999790 TY-2482_chromosome  | B7L7R0        | Zinc transporter subunit: periplasmic-binding component of ABC superfamily                                                                             | Escherichia coli (strain 55989 / EAEC)           |
| 111835 | 1000798 | 1001550 TY-2482_chromosome | B7L7R1        | Zinc transporter subunit: ATP-binding component of ABC superfamily                                                                                     | Escherichia coli (strain 55989 / EAEC)           |
| 111636 | 1001550 | 1002332 TY-2482_chromosome | B7L7R2        | Zinc transporter subunit: membrane component of ABC superfamily                                                                                        | Escherichia coli (strain 55989 / EAEC)           |
| 33872  | 1003492 | 1002485 TY-2482_chromosome | B7L7R3        | Holliday junction ATP-dependent DNA helicase ruvB (EC 3.6.4.12)                                                                                        | Escherichia coli (strain 55989 / EAEC)           |
| 33868  | 1004112 | 1003504 TY-2482_chromosome | B7L7R4        | Holliday junction ATP-dependent DNA helicase ruvA (EC 3.6.4.12)                                                                                        | Escherichia coli (strain 55989 / EAEC)           |
| 17220  | 1004288 | 1004986 TY-2482_chromosome | B3Y0L8        | Predicted protein                                                                                                                                      | Escherichia coli O111:H-                         |
| 33876  | 1005512 | 1004994 TY-2482_chromosome | B7L7R6        | Crossover junction endodeoxyribonuclease ruvC (EC 3.1.22.4) (Holliday junction nuclease ruvC)                                                          | Escherichia coli (strain 55989 / EAEC)           |
| 97940  | 1006287 | 1005550 TY-2482_chromosome | B7L7R7        | UPF0082 protein yeeN 1                                                                                                                                 | Escherichia coli (strain 55989 / EAEC)           |
| 77341  | 1006759 | 1006319 TY-2482_chromosome | B7L7R8        | dATP pyrophosphohydrolase (EC 3.6.1.-)                                                                                                                 | Escherichia coli (strain 55989 / EAEC)           |
| 34091  | 1008533 | 1006764 TY-2482_chromosome | B7L7R9        | Aspartyl-tRNA synthetase (EC 6.1.1.12) (Aspartate--tRNA ligase) (AspRS)                                                                                | Escherichia coli (strain 55989 / EAEC)           |
| 71884  | 1008843 | 1009406 TY-2482_chromosome | B7L750        | Putative hydrolase                                                                                                                                     | Escherichia coli (strain 55989 / EAEC)           |
| 101333 | 1009764 | 1010009 TY-2482_chromosome | C6V226        | Putative uncharacterized protein                                                                                                                       | Escherichia coli O157:H7 (strain TW14359 / EHEC) |
| 24728  | 1011246 | 1010554 TY-2482_chromosome | B7LEU8        | Putative uncharacterized protein                                                                                                                       | Escherichia coli (strain 55989 / EAEC)           |
| 28034  | 1012706 | 1011171 TY-2482_chromosome | B7LEU7        | Putative tail fiber protein (Modular protein)                                                                                                          | Escherichia coli (strain 55989 / EAEC)           |
| 98402  | 1013457 | 1012861 TY-2482_chromosome | D3H3F5        | Putative prophage-encoded outer membrane protein                                                                                                       | Escherichia coli O44:H18 (strain 042 / EAEC)     |
| 64239  | 1016920 | 1013528 TY-2482_chromosome | B7L8N6        | Host specificity protein J                                                                                                                             | Escherichia coli (strain 55989 / EAEC)           |
| 93092  | 1017652 | 1016984 TY-2482_chromosome | D3G5I6        | Phage tail assembly protein                                                                                                                            | Escherichia coli O44:H18 (strain 042 / EAEC)     |
| 27267  | 1018292 | 1019095 TY-2482_chromosome | Q1RCC4        | Putative uncharacterized protein                                                                                                                       | Escherichia coli (strain UT189 / UPEC)           |
| 79402  | 1018335 | 1017553 TY-2482_chromosome | B7LEU3        | Putative tail fiber component K of prophage                                                                                                            | Escherichia coli (strain 55989 / EAEC)           |
| 111771 | 1019325 | 1018999 TY-2482_chromosome | B7LBD1        | Minor tail protein M                                                                                                                                   | Escherichia coli (strain 55989 / EAEC)           |
| 105592 | 1021934 | 1019325 TY-2482_chromosome | C8UEI9        | Putative tail length tape measure protein                                                                                                              | Escherichia coli O111:H- (strain 11128 / EHEC)   |
| 25168  | 1022113 | 1023447 TY-2482_chromosome | A1AAL5        | Putative uncharacterized protein                                                                                                                       | Escherichia coli O1:K1 / APEC                    |
| 114314 | 1023946 | 1023554 TY-2482_chromosome | C8U3B0        | Putative minor tail protein                                                                                                                            | Escherichia coli O103:H2 (strain 12009 / EHEC)   |
| 60231  | 1024518 | 1023946 TY-2482_chromosome | D3H3E3        | Phage minor tail protein                                                                                                                               | Escherichia coli O44:H18 (strain 042 / EAEC)     |
| 84631  | 1024886 | 1024536 TY-2482_chromosome | B7L472        | Tail attachment protein (Minor capsid protein FII)                                                                                                     | Escherichia coli (strain 55989 / EAEC)           |
| 59176  | 1025310 | 1024882 TY-2482_chromosome | B7L471        | Putative uncharacterized protein                                                                                                                       | Escherichia coli (strain 55989 / EAEC)           |
| 95639  | 1026342 | 1025317 TY-2482_chromosome | B7L470        | Major head protein (Head protein gp7)                                                                                                                  | Escherichia coli (strain 55989 / EAEC)           |
| 105238 | 1026747 | 1026403 TY-2482_chromosome | D3H3D9        | Phage head decoration protein                                                                                                                          | Escherichia coli O44:H18 (strain 042 / EAEC)     |
| 90026  | 1028289 | 1026787 TY-2482_chromosome | B7L468        | Head-tail preconnector protein GP5                                                                                                                     | Escherichia coli (strain 55989 / EAEC)           |
| 107063 | 1029871 | 1028282 TY-2482_chromosome | C8TUI5        | Putative portal protein                                                                                                                                | Escherichia coli O26:H11 (strain 11368 / EHEC)   |
| 111505 | 1030074 | 1029871 TY-2482_chromosome | C8TKW0        | Head-tail joining protein                                                                                                                              | Escherichia coli O26:H11 (strain 11368 / EHEC)   |



|        |         |                            |                                                                              |                                                                                                                   |                                                          |
|--------|---------|----------------------------|------------------------------------------------------------------------------|-------------------------------------------------------------------------------------------------------------------|----------------------------------------------------------|
| 84566  | 1032028 | 1030061 TY-2482_chromosome | B7L465                                                                       | Terminase large subunit (Gp2)                                                                                     | Escherichia coli (strain 55989 / EAEC)                   |
| 27274  | 1032746 | 1031961 TY-2482_chromosome | A1AAK5                                                                       | Prophage Qin DNA packaging protein NU1-like protein                                                               | Escherichia coli O1:K1 / APEC                            |
| 29487  | 1034183 | 1033713 TY-2482_chromosome | B7N3K3                                                                       | Endopeptidase (Lysis protein) from bacteriophage origin (EC 3.4.-.-)                                              | Escherichia coli O17:K52:H18 (strain UMN026 / ExPEC)     |
| 24557  | 1034401 | 1034183 TY-2482_chromosome | B7MPY1                                                                       | Putative uncharacterized protein                                                                                  | Escherichia coli O81 (strain ED1a)                       |
| 17934  | 1034541 | 1034329 TY-2482_chromosome | D6IMMO                                                                       | Predicted protein                                                                                                 | Escherichia coli FVEC1412                                |
| 59063  | 1035198 | 1034668 TY-2482_chromosome | B7LES4                                                                       | Lysozyme (EC 3.2.1.17)                                                                                            | Escherichia coli (strain 55989 / EAEC)                   |
| 29118  | 1035327 | 1035638 TY-2482_chromosome | B7LES3                                                                       | Putative uncharacterized protein                                                                                  | Escherichia coli (strain 55989 / EAEC)                   |
| 25586  | 1036457 | 1035654 TY-2482_chromosome | B7LES2                                                                       | Putative uncharacterized protein                                                                                  | Escherichia coli (strain 55989 / EAEC)                   |
| 79307  | 1036755 | 1036465 TY-2482_chromosome | D3H2S6                                                                       | Putative phage lysis protein                                                                                      | Escherichia coli O44:H18 (strain O42 / EAEC)             |
| 28911  | 1038711 | 1036831 TY-2482_chromosome | B7MPX6                                                                       | Putative uncharacterized protein                                                                                  | Escherichia coli O81 (strain ED1a)                       |
| 28583  | 1039137 | 1038847 TY-2482_chromosome | B7MV04                                                                       | Putative uncharacterized protein                                                                                  | Escherichia coli O81 (strain ED1a)                       |
| r354   | 1039423 | 1039348 TY-2482_chromosome | ref NC_010473 :2875549-2875624 Ile tRNA  [gene=ileY] [locus_tag=ECDH10B_2820 |                                                                                                                   |                                                          |
| 110860 | 1040522 | 1039467 TY-2482_chromosome | C6USM2                                                                       | Putative DNA adenine methyltransferase encoded by prophage CP-9330                                                | Escherichia coli O157:H7 (strain TW14359 / EHEC)         |
| 27487  | 1040910 | 1040677 TY-2482_chromosome | B7NVG6                                                                       | Putative uncharacterized protein                                                                                  | Escherichia coli O7:K1 (strain IAI39 / ExPEC)            |
| 11019  | 1041142 | 1042065 TY-2482_chromosome | B3HVA3                                                                       | Putative uncharacterized protein                                                                                  | Escherichia coli F11                                     |
| 9406   | 1042055 | 1042600 TY-2482_chromosome | B3IDN1                                                                       | Putative uncharacterized protein                                                                                  | Escherichia coli E22                                     |
| 9386   | 1042957 | 1042619 TY-2482_chromosome | B3HVA5                                                                       | Antitermination protein Q                                                                                         | Escherichia coli F11                                     |
| 108737 | 1043964 | 1042978 TY-2482_chromosome | C8TVZ3                                                                       | Putative uncharacterized protein                                                                                  | Escherichia coli O26:H11 (strain 11368 / EHEC)           |
| 24937  | 1044787 | 1043975 TY-2482_chromosome | D3QMI3                                                                       | KilA-N domain family                                                                                              | Escherichia coli O55:H7 (strain CB9615 / EPEC)           |
| 28121  | 1045345 | 1044953 TY-2482_chromosome | D3QMI2                                                                       | Crossover junction endodeoxyribonuclease rusA (EC 3.1.22.4)                                                       | Escherichia coli O55:H7 (strain CB9615 / EPEC)           |
| 103835 | 1046318 | 1045668 TY-2482_chromosome | C8U2N1                                                                       | Putative DNA methylase                                                                                            | Escherichia coli O103:H2 (strain 12009 / EHEC)           |
| 100128 | 1046806 | 1046321 TY-2482_chromosome | C8U2N0                                                                       | Putative uncharacterized protein                                                                                  | Escherichia coli O103:H2 (strain 12009 / EHEC)           |
| 28222  | 1047666 | 1046812 TY-2482_chromosome | B7MND7                                                                       | Replication protein from phage origin                                                                             | Escherichia coli O45:K1 (strain S88 / ExPEC)             |
| 86176  | 1047848 | 1047627 TY-2482_chromosome | C8TW00                                                                       | Putative uncharacterized protein                                                                                  | Escherichia coli O26:H11 (strain 11368 / EHEC)           |
| 13597  | 1049038 | 1047848 TY-2482_chromosome | B3WIT4                                                                       | Putative antirepressor                                                                                            | Escherichia coli B171                                    |
| 21556  | 1049625 | 1049038 TY-2482_chromosome | D6HVI9                                                                       | YmfL protein                                                                                                      | Escherichia coli B088                                    |
| 105454 | 1049845 | 1049588 TY-2482_chromosome | C8UKW3                                                                       | Putative antirepressor protein Cro                                                                                | Escherichia coli O111:H- (strain 11128 / EHEC)           |
| 109607 | 1049943 | 1050632 TY-2482_chromosome | C8UKW2                                                                       | Putative repressor protein Ci                                                                                     | Escherichia coli O111:H- (strain 11128 / EHEC)           |
| 26492  | 1051064 | 1050735 TY-2482_chromosome | Q1R2C0                                                                       | Putative uncharacterized protein                                                                                  | Escherichia coli (strain UT189 / UPEC)                   |
| 100062 | 1051107 | 1051697 TY-2482_chromosome | C8TW05                                                                       | Putative uncharacterized protein                                                                                  | Escherichia coli O26:H11 (strain 11368 / EHEC)           |
| 7029   | 1051766 | 1052587 TY-2482_chromosome | P76513                                                                       | Uncharacterized protein yfdQ                                                                                      | Escherichia coli (strain K12)                            |
| 78016  | 1052718 | 1053251 TY-2482_chromosome | C8TW07                                                                       | Putative uncharacterized protein                                                                                  | Escherichia coli O26:H11 (strain 11368 / EHEC)           |
| 7032   | 1053245 | 1053604 TY-2482_chromosome | P76515                                                                       | Uncharacterized protein yfdS                                                                                      | Escherichia coli (strain K12)                            |
| 59493  | 1053604 | 1053804 TY-2482_chromosome | C8U7N2                                                                       | Putative uncharacterized protein                                                                                  | Escherichia coli O103:H2 (strain 12009 / EHEC)           |
| 81711  | 1053800 | 1054036 TY-2482_chromosome | C8U7N3                                                                       | Putative uncharacterized protein                                                                                  | Escherichia coli O103:H2 (strain 12009 / EHEC)           |
| 14555  | 1054036 | 1054581 TY-2482_chromosome | E7UPB9                                                                       | Phage EaA protein                                                                                                 | Escherichia coli EC4100B                                 |
| 87074  | 1054547 | 1055098 TY-2482_chromosome | C8TPV2                                                                       | Putative uncharacterized protein                                                                                  | Escherichia coli O26:H11 (strain 11368 / EHEC)           |
| 15631  | 1055098 | 1055853 TY-2482_chromosome | B3WUW8                                                                       | Upf89.5                                                                                                           | Escherichia coli B171                                    |
| 29071  | 1055941 | 1056180 TY-2482_chromosome | B2TYH9                                                                       | Hypothetical bacteriophage protein                                                                                | Shigella boydii serotype 18 (strain CDC 3083-94 / BSS12) |
| 29266  | 1056342 | 1056575 TY-2482_chromosome | B6I1E3                                                                       | Putative phage excisionase                                                                                        | Escherichia coli (strain SE11)                           |
| 24981  | 1056622 | 1057941 TY-2482_chromosome | B7MPT9                                                                       | Phage integrase                                                                                                   | Escherichia coli O81 (strain ED1a)                       |
| 27722  | 1057926 | 1059141 TY-2482_chromosome | E1RYP9                                                                       | Putative uncharacterized protein                                                                                  | Escherichia coli (strain UM146)                          |
| 30349  | 1059185 | 1059925 TY-2482_chromosome | B7L753                                                                       | tRNA (cmo5U34)-methyltransferase (EC 2.1.1.-)                                                                     | Escherichia coli (strain 55989 / EAEC)                   |
| 30353  | 1059925 | 1060893 TY-2482_chromosome | B7L754                                                                       | tRNA (mo5U34)-methyltransferase (EC 2.1.1.-)                                                                      | Escherichia coli (strain 55989 / EAEC)                   |
| 114176 | 1063491 | 1061065 TY-2482_chromosome | B7L755                                                                       | Trimethylamine N-oxide reductase system III, catalytic subunit (EC 1.6.6.9)                                       | Escherichia coli (strain 55989 / EAEC)                   |
| 64743  | 1064616 | 1063519 TY-2482_chromosome | B7L756                                                                       | TMAO reductase III (TorYZ), cytochrome c-type subunit                                                             | Escherichia coli (strain 55989 / EAEC)                   |
| 30435  | 1065750 | 1065007 TY-2482_chromosome | B7L757                                                                       | Copper homeostasis protein CutC                                                                                   | Escherichia coli (strain 55989 / EAEC)                   |
| 84440  | 1066330 | 1065767 TY-2482_chromosome | B7L758                                                                       | Putative metal-binding enzyme                                                                                     | Escherichia coli (strain 55989 / EAEC)                   |
| 34167  | 1066546 | 1068276 TY-2482_chromosome | B7L759                                                                       | Arginyl-tRNA synthetase (EC 6.1.1.19) (Arginine--tRNA ligase) (ArgRS)                                             | Escherichia coli (strain 55989 / EAEC)                   |
| 20981  | 1068435 | 1068941 TY-2482_chromosome | D6HYZ3                                                                       | YecT protein                                                                                                      | Escherichia coli B088                                    |
| 59016  | 1069456 | 1069067 TY-2482_chromosome | B7L771                                                                       | Putative uncharacterized protein flhE                                                                             | Escherichia coli (strain 55989 / EAEC)                   |
| 77574  | 1071534 | 1069459 TY-2482_chromosome | B7L772                                                                       | Putative flagellar export pore protein                                                                            | Escherichia coli (strain 55989 / EAEC)                   |
| 101874 | 1072675 | 1071530 TY-2482_chromosome | B7L773                                                                       | Flagellar export pore protein                                                                                     | Escherichia coli (strain 55989 / EAEC)                   |
| 61187  | 1073521 | 1072880 TY-2482_chromosome | B7L774                                                                       | Chemotaxis regulator, protein phosphatase for CheY                                                                | Escherichia coli (strain 55989 / EAEC)                   |
| 70106  | 1073921 | 1073535 TY-2482_chromosome | B7L775                                                                       | Chemotaxis regulator transmitting signal to flagellar motor component                                             | Escherichia coli (strain 55989 / EAEC)                   |
| 99111  | 1074985 | 1073939 TY-2482_chromosome | B7L776                                                                       | Fused chemotaxis regulator ; protein-glutamate methyltransferase in two-component regulatory system with CheA (EC | Escherichia coli (strain 55989 / EAEC)                   |
| 71432  | 1075848 | 1074991 TY-2482_chromosome | B7L777                                                                       | Chemotaxis regulator, protein-glutamate methyltransferase (EC 2.1.1.80)                                           | Escherichia coli (strain 55989 / EAEC)                   |
| 106392 | 1077468 | 1075870 TY-2482_chromosome | B7L778                                                                       | Methyl-accepting protein IV                                                                                       | Escherichia coli (strain 55989 / EAEC)                   |
| 114182 | 1079175 | 1077517 TY-2482_chromosome | B7L779                                                                       | Methyl-accepting chemotaxis protein II                                                                            | Escherichia coli (strain 55989 / EAEC)                   |
| 75158  | 1079823 | 1079323 TY-2482_chromosome | B7L7U0                                                                       | Purine-binding chemotaxis protein                                                                                 | Escherichia coli (strain 55989 / EAEC)                   |
| 99112  | 1081808 | 1079847 TY-2482_chromosome | B7L7U1                                                                       | Fused chemotactic sensory histidine kinase in two-component regulatory system with CheB and CheY: sensory histidi | Escherichia coli (strain 55989 / EAEC)                   |
| 82339  | 1082739 | 1081816 TY-2482_chromosome | B7L7U2                                                                       | Protein that enables flagellar motor rotation                                                                     | Escherichia coli (strain 55989 / EAEC)                   |
| 97166  | 1083623 | 1082739 TY-2482_chromosome | B7L7U3                                                                       | Proton conductor component of flagella motor                                                                      | Escherichia coli (strain 55989 / EAEC)                   |
| 83333  | 1084328 | 1083753 TY-2482_chromosome | B7L7U4                                                                       | DNA-binding transcriptional dual regulator with FlhC                                                              | Escherichia coli (strain 55989 / EAEC)                   |

|        |         |                            |                                  |                                                                                                    |                                                 |
|--------|---------|----------------------------|----------------------------------|----------------------------------------------------------------------------------------------------|-------------------------------------------------|
| 30981  | 1084690 | 1084334 TY-2482_chromosome | B7L7U5                           | Flagellar transcriptional regulator FlhD                                                           | Escherichia coli (strain 55989 / EAEC)          |
| 99036  | 1085460 | 1085885 TY-2482_chromosome | B7L7U6                           | Universal stress protein                                                                           | Escherichia coli (strain 55989 / EAEC)          |
| 87924  | 1087319 | 1085898 TY-2482_chromosome | B7L7U7                           | Trehalose-6-phosphate synthase (EC 2.4.1.15)                                                       | Escherichia coli (strain 55989 / EAEC)          |
| 24408  | 1088151 | 1087297 TY-2482_chromosome | A1AC54                           | Trehalose-6-phosphate phosphatase                                                                  | Escherichia coli O1:K1 / APEC                   |
| 77336  | 1089250 | 1088264 TY-2482_chromosome | B7L7U9                           | Fused L-arabinose transporter subunits of ABC superfamily: membrane components                     | Escherichia coli (strain 55989 / EAEC)          |
| 114187 | 1090776 | 1089265 TY-2482_chromosome | B7L7V0                           | Fused L-arabinose transporter subunits of ABC superfamily: ATP-binding components                  | Escherichia coli (strain 55989 / EAEC)          |
| 73602  | 1091835 | 1090849 TY-2482_chromosome | B7L7V1                           | L-arabinose transporter subunit ; periplasmic-binding component of ABC superfamily                 | Escherichia coli (strain 55989 / EAEC)          |
| 28109  | 1092160 | 1091924 TY-2482_chromosome | Q07GT5                           | Putative uncharacterized protein                                                                   | Escherichia coli O6:K15:H31 (strain 536 / UPEC) |
| 78960  | 1092632 | 1093132 TY-2482_chromosome | B7L7V2                           | Putative ferritin-like protein                                                                     | Escherichia coli (strain 55989 / EAEC)          |
| 8589   | 1093217 | 1093486 TY-2482_chromosome | C3T592                           | Putative uncharacterized protein                                                                   | Escherichia coli                                |
| r111   | 1093705 | 1093546 TY-2482_chromosome | ref NC_010473 :2076871-2077030 - | [gene=isrB] [locus_tag=ECDH10B_2044]                                                               |                                                 |
| 115184 | 1093929 | 1094249 TY-2482_chromosome | B7L7V5                           | Putative uncharacterized protein yecR                                                              | Escherichia coli (strain 55989 / EAEC)          |
| 97167  | 1094424 | 1094918 TY-2482_chromosome | B7L7V6                           | Ferritin iron storage protein (Cytoplasmic)                                                        | Escherichia coli (strain 55989 / EAEC)          |
| 95415  | 1095198 | 1094962 TY-2482_chromosome | B7L7V7                           | Putative uncharacterized protein yecH                                                              | Escherichia coli (strain 55989 / EAEC)          |
| 83556  | 1095388 | 1096596 TY-2482_chromosome | B7L7V8                           | Tyrosine transporter                                                                               | Escherichia coli (strain 55989 / EAEC)          |
| 59017  | 1097326 | 1096664 TY-2482_chromosome | B7L7V9                           | Putative uncharacterized protein yecA                                                              | Escherichia coli (strain 55989 / EAEC)          |
| r226   | 1097608 | 1097522 TY-2482_chromosome | ref NC_010473 :2080847-2080933   | Leu tRNA [gene=leuZ] [locus_tag=ECDH10B_2050]                                                      |                                                 |
| r506   | 1097694 | 1097621 TY-2482_chromosome | ref NC_010473 :2080946-2081019   | Cys tRNA [gene=cysT] [locus_tag=ECDH10B_2051]                                                      |                                                 |
| r310   | 1097824 | 1097749 TY-2482_chromosome | ref NC_010473 :4490968-4491043   | Gly tRNA [gene=glyY] [locus_tag=ECDH10B_4360]                                                      |                                                 |
| 76399  | 1098524 | 1097979 TY-2482_chromosome | B7L807                           | Phosphatidylglycerophosphate synthetase (EC 2.7.8.5)                                               | Escherichia coli (strain 55989 / EAEC)          |
| 34542  | 1100413 | 1098584 TY-2482_chromosome | B7L855                           | UvrABC system protein C (Protein uvrC) [Excinuclease ABC subunit C]                                | Escherichia coli (strain 55989 / EAEC)          |
| 77404  | 1101066 | 1100413 TY-2482_chromosome | B7L856                           | DNA-binding response regulator in two-component regulatory system with BarA                        | Escherichia coli (strain 55989 / EAEC)          |
| 115679 | 1101525 | 1101746 TY-2482_chromosome | B7L858                           | Putative uncharacterized protein yecF                                                              | Escherichia coli (strain 55989 / EAEC)          |
| 109719 | 1102539 | 1101820 TY-2482_chromosome | B7L859                           | DNA-binding transcriptional activator                                                              | Escherichia coli (strain 55989 / EAEC)          |
| 102865 | 1103521 | 1102772 TY-2482_chromosome | B7L8T0                           | Putative transporter subunit: ATP-binding component of ABC superfamily transporter                 | Escherichia coli (strain 55989 / EAEC)          |
| 104585 | 1104186 | 1103521 TY-2482_chromosome | B7L8T1                           | Putative transporter subunit: permease component of ABC superfamily transporter                    | Escherichia coli (strain 55989 / EAEC)          |
| 30573  | 1105187 | 1104204 TY-2482_chromosome | B7L8T2                           | D-cysteine desulhydrase (EC 4.4.1.15)                                                              | Escherichia coli (strain 55989 / EAEC)          |
| 91897  | 1106092 | 1105295 TY-2482_chromosome | B7L8T3                           | Cysteine transporter subunit ; periplasmic-binding component of ABC superfamily                    | Escherichia coli (strain 55989 / EAEC)          |
| 96838  | 1106767 | 1106183 TY-2482_chromosome | D3GXH3                           | FlhZ protein                                                                                       | Escherichia coli O44:H18 (strain 042 / EAEC)    |
| 69999  | 1107496 | 1106780 TY-2482_chromosome | B7L8T5                           | RNA polymerase sigma factor                                                                        | Escherichia coli (strain 55989 / EAEC)          |
| 105040 | 1107950 | 1107663 TY-2482_chromosome | B7L8T6                           | Flagellin                                                                                          | Escherichia coli (strain 55989 / EAEC)          |
| 105039 | 1108675 | 1107926 TY-2482_chromosome | B7L8T6                           | Flagellin                                                                                          | Escherichia coli (strain 55989 / EAEC)          |
| 75155  | 1108923 | 1110335 TY-2482_chromosome | B7L8T7                           | Putative Flagellar hook-associated protein 2 (HAP2) (Filament cap protein) (Flagellar cap protein) | Escherichia coli (strain 55989 / EAEC)          |
| 88390  | 1110354 | 1110761 TY-2482_chromosome | B7L8T8                           | Flagellar protein potentiates polymerization                                                       | Escherichia coli (strain 55989 / EAEC)          |
| 30992  | 1110764 | 1111126 TY-2482_chromosome | B7L8T9                           | Flagellar protein FlhT                                                                             | Escherichia coli (strain 55989 / EAEC)          |
| 102886 | 1111207 | 1112691 TY-2482_chromosome | B7L8U0                           | Cytoplasmic alpha-amylase (EC 3.2.1.1)                                                             | Escherichia coli (strain 55989 / EAEC)          |
| 78968  | 1113141 | 1112731 TY-2482_chromosome | B7L8U1                           | Putative uncharacterized protein yedD                                                              | Escherichia coli (strain 55989 / EAEC)          |
| 86355  | 1113328 | 1114530 TY-2482_chromosome | B7L8U2                           | Putative uncharacterized protein yedE                                                              | Escherichia coli (strain 55989 / EAEC)          |
| 110382 | 1114530 | 1114760 TY-2482_chromosome | B7L8U3                           | Putative uncharacterized protein yedF                                                              | Escherichia coli (strain 55989 / EAEC)          |
| 15356  | 1114872 | 1115366 TY-2482_chromosome | E68BE6                           | Gifsy-2 prophage YedK                                                                              | Escherichia coli MS 85-1                        |
| 114041 | 1115558 | 1116124 TY-2482_chromosome | B7L8U5                           | Putative transposase ORF A, IS609 family                                                           | Escherichia coli (strain 55989 / EAEC)          |
| 110429 | 1117081 | 1116287 TY-2482_chromosome | B7L8U6                           | Putative DNA-binding transcriptional regulator; DLP12 prophage                                     | Escherichia coli (strain 55989 / EAEC)          |
| 73755  | 1117642 | 1117094 TY-2482_chromosome | B7L8U7                           | Putative kinase inhibitor; DLP12 prophage                                                          | Escherichia coli (strain 55989 / EAEC)          |
| 13066  | 1118243 | 1118557 TY-2482_chromosome | E9UHF9                           | Conserved domain protein                                                                           | Escherichia coli MS 57-2                        |
| 59169  | 1118323 | 1117814 TY-2482_chromosome | B7L8U8                           | Putative multidrug resistance protein; DLP12 prophage                                              | Escherichia coli (strain 55989 / EAEC)          |
| 30986  | 1118801 | 1118490 TY-2482_chromosome | B7L8U9                           | Flagellar hook-basal body complex protein FlhE                                                     | Escherichia coli (strain 55989 / EAEC)          |
| 98080  | 1119016 | 1120671 TY-2482_chromosome | B7L8V0                           | Flagellar basal-body MS-ring and collar protein                                                    | Escherichia coli (strain 55989 / EAEC)          |
| 90951  | 1120667 | 1121659 TY-2482_chromosome | B7L8V1                           | Flagellar motor switching and energizing component                                                 | Escherichia coli (strain 55989 / EAEC)          |
| 79321  | 1121655 | 1122338 TY-2482_chromosome | B7L8V2                           | Flagellar biosynthesis protein                                                                     | Escherichia coli (strain 55989 / EAEC)          |
| 76640  | 1122341 | 1123711 TY-2482_chromosome | B7L8V3                           | Flagellum-specific ATP synthase (EC 3.6.3.14)                                                      | Escherichia coli (strain 55989 / EAEC)          |
| 113091 | 1123733 | 1124173 TY-2482_chromosome | B7L8V4                           | Flagellar protein                                                                                  | Escherichia coli (strain 55989 / EAEC)          |
| 110430 | 1124173 | 1125297 TY-2482_chromosome | B7L8V5                           | Flagellar hook-length control protein                                                              | Escherichia coli (strain 55989 / EAEC)          |
| 71643  | 1125405 | 1125866 TY-2482_chromosome | B7L8V6                           | Flagellar biosynthesis protein                                                                     | Escherichia coli (strain 55989 / EAEC)          |
| 98237  | 1125874 | 1126875 TY-2482_chromosome | B7L8V7                           | Flagellar motor switching and energizing component                                                 | Escherichia coli (strain 55989 / EAEC)          |
| 59171  | 1126875 | 1127285 TY-2482_chromosome | B7L8V8                           | Flagellar motor switching and energizing component                                                 | Escherichia coli (strain 55989 / EAEC)          |
| 99113  | 1127291 | 1127653 TY-2482_chromosome | B7L8V9                           | Flagellar biosynthesis protein                                                                     | Escherichia coli (strain 55989 / EAEC)          |
| 95619  | 1127656 | 1128390 TY-2482_chromosome | B7L8W0                           | Flagellar biosynthesis protein                                                                     | Escherichia coli (strain 55989 / EAEC)          |
| 98605  | 1128403 | 1128669 TY-2482_chromosome | B7L8W1                           | Flagellar biosynthesis protein                                                                     | Escherichia coli (strain 55989 / EAEC)          |
| 62056  | 1128681 | 1129463 TY-2482_chromosome | B7L8W2                           | Flagellar biosynthetic protein flhR                                                                | Escherichia coli (strain 55989 / EAEC)          |
| 84622  | 1129756 | 1130376 TY-2482_chromosome | B7L8W3                           | DNA-binding transcriptional activator, co-regulator with RcsE                                      | Escherichia coli (strain 55989 / EAEC)          |
| 27947  | 1130502 | 1130774 TY-2482_chromosome | A1ACA1                           | Putative uncharacterized protein                                                                   | Escherichia coli O1:K1 / APEC                   |
| 24989  | 1131104 | 1130757 TY-2482_chromosome | Q1RAI7                           | Putative uncharacterized protein                                                                   | Escherichia coli (strain UTI89 / UPEC)          |
| r225   | 1131147 | 1131061 TY-2482_chromosome | ref NC_010473 :2114259-2114345 - | [gene=dsrA] [locus_tag=ECDH10B_2096]                                                               |                                                 |
| 34854  | 1133852 | 1132026 TY-2482_chromosome | Q8Z5R0                           | Cellulose synthesis regulatory protein                                                             | Salmonella typhi                                |

|        |         |                            |               |                                                                                                                  |                                                   |
|--------|---------|----------------------------|---------------|------------------------------------------------------------------------------------------------------------------|---------------------------------------------------|
| 82338  | 1135201 | 1134287 TY-2482_chromosome | B7L8X1        | Putative uncharacterized protein yedI                                                                            | Escherichia coli (strain 55989 / EAEC)            |
| 72423  | 1135374 | 1136291 TY-2482_chromosome | B7L8X2        | Putative uncharacterized protein yedA                                                                            | Escherichia coli (strain 55989 / EAEC)            |
| 77454  | 1136753 | 1136286 TY-2482_chromosome | B7L8X3        | DNA mismatch endonuclease of very short patch repair (EC 3.1.-.-)                                                | Escherichia coli (strain 55989 / EAEC)            |
| 66293  | 1138152 | 1136737 TY-2482_chromosome | B7L8X4        | Cytosine-specific methyltransferase (EC 2.1.1.37)                                                                | Escherichia coli (strain 55989 / EAEC)            |
| 63987  | 1138950 | 1138222 TY-2482_chromosome | D3GXLO        | Putative phosphohydrolase                                                                                        | Escherichia coli O44:H18 (strain 042 / EAEC)      |
| 112152 | 1139319 | 1138957 TY-2482_chromosome | B7L8X6        | Putative uncharacterized protein yedR                                                                            | Escherichia coli (strain 55989 / EAEC)            |
| 28096  | 1139412 | 1139663 TY-2482_chromosome | E4PAJ7        | Putative uncharacterized protein                                                                                 | Escherichia coli O83:H1 (strain NRG 857C / AIEC)  |
| 28732  | 1139815 | 1140941 TY-2482_chromosome | B7MWF2        | Outer membrane protein F (Porin ompF)                                                                            | Escherichia coli O81 (strain ED1a)                |
| 17824  | 1140996 | 1141343 TY-2482_chromosome | E9XVB1        | Transposase (Fragment)                                                                                           | Escherichia coli TW10509                          |
| 115338 | 1142417 | 1141269 TY-2482_chromosome | D3GUS1        | Transposase <i>InsI</i> for insertion sequence element IS30b/c/d                                                 | Escherichia coli O44:H18 (strain 042 / EAEC)      |
| 64171  | 1142491 | 1143372 TY-2482_chromosome | B7LDT8        | Putative uncharacterized protein                                                                                 | Escherichia coli (strain 55989 / EAEC)            |
| 14869  | 1143679 | 1143437 TY-2482_chromosome | D8AVP8        | Putative uncharacterized protein                                                                                 | Escherichia coli MS 116-1                         |
| 14367  | 1144578 | 1143884 TY-2482_chromosome | E1U309        | Transposase <i>InsAB</i> '                                                                                       | Escherichia coli                                  |
| 31326  | 1144664 | 1145512 TY-2482_chromosome | B7L8Y4        | Chaperone protein hchA (Hsp31)                                                                                   | Escherichia coli (strain 55989 / EAEC)            |
| 95621  | 1146971 | 1145616 TY-2482_chromosome | B7L8Y5        | Sensory kinase in two-component regulatory system with YedW                                                      | Escherichia coli (strain 55989 / EAEC)            |
| 63988  | 1147690 | 1146974 TY-2482_chromosome | D3GXL6        | Two-component response regulator                                                                                 | Escherichia coli O44:H18 (strain 042 / EAEC)      |
| 102922 | 1147775 | 1148185 TY-2482_chromosome | B7L8Y7        | 5-hydroxyisourate hydrolase                                                                                      | Escherichia coli (strain 55989 / EAEC)            |
| 34855  | 1148297 | 1149298 TY-2482_chromosome | B7L8Y8        | Sulfoxide reductase catalytic subunit yedY (EC 1.8.-.-)                                                          | Escherichia coli (strain 55989 / EAEC)            |
| 34859  | 1149302 | 1149934 TY-2482_chromosome | B7L8Y9        | Sulfoxide reductase heme-binding subunit yedZ (Flavocytochrome yedZ)                                             | Escherichia coli (strain 55989 / EAEC)            |
| 79322  | 1150194 | 1150841 TY-2482_chromosome | B7L8Z0        | Putative uncharacterized protein yodA                                                                            | Escherichia coli (strain 55989 / EAEC)            |
| 16855  | 1150880 | 1151206 TY-2482_chromosome | E2QNG5        | Putative uncharacterized protein                                                                                 | Escherichia coli                                  |
| r200   | 1151603 | 1151514 TY-2482_chromosome | ref NC_010473 | :2132500-2132589 Ser tRNA  [gene=serU] [locus_tag=ECDH10B_2118]                                                  |                                                   |
|        | 78944   | 1151658                    | D3GYI6        | Protein mtfA (Mlc titration factor A)                                                                            | Escherichia coli O44:H18 (strain 042 / EAEC)      |
| r399   | 1152595 | 1152670 TY-2482_chromosome | ref NC_010473 | :2151292-2151367 Asn tRNA  [gene=asnV] [locus_tag=ECDH10B_2133]                                                  |                                                   |
|        | 81060   | 1152832                    | B7L822        | Integrase                                                                                                        | Escherichia coli (strain 55989 / EAEC)            |
|        | 114003  | 1155592                    | B7L823        | Salicylate synthase                                                                                              | Escherichia coli (strain 55989 / EAEC)            |
|        | 69391   | 1157023                    | B7L824        | Putative permease of yersiniabactin-iron transporter YbtX                                                        | Escherichia coli (strain 55989 / EAEC)            |
|        | 62801   | 1160484                    | B7L826        | Permease and ATP-binding protein of yersiniabactin-iron ABC transporter YbtF                                     | Escherichia coli (strain 55989 / EAEC)            |
|        | 88438   | 1160651                    | B7L827        | AraC type regulator of yersiniabactin gene cluster (HPI)                                                         | Escherichia coli (strain 55989 / EAEC)            |
|        | 82912   | 1161783                    | B7L828        | High-molecular-weight nonribosomal peptide/polyketide synthetase 2 (HMWP2)                                       | Escherichia coli (strain 55989 / EAEC)            |
|        | 77456   | 1167996                    | B7L829        | High-molecular-weight nonribosomal peptide/polyketide synthetase 1 (HMWP1)                                       | Escherichia coli (strain 55989 / EAEC)            |
|        | 95625   | 1177424                    | B7L900        | ThiazolinyI-5-HMWP1 reductase YbtU                                                                               | Escherichia coli (strain 55989 / EAEC)            |
|        | 115995  | 1178581                    | B7L901        | Putative thioesterase YbtT                                                                                       | Escherichia coli (strain 55989 / EAEC)            |
|        | 114004  | 1179388                    | B7L902        | Salicyl-AMP ligase YbtE                                                                                          | Escherichia coli (strain 55989 / EAEC)            |
|        | 86971   | 1181096                    | B7L903        | Yersiniabactin/pesticin outer membrane receptor (IRPC)                                                           | Escherichia coli (strain 55989 / EAEC)            |
|        | 19693   | 1183774                    | E6B2Q6        | Uncharacterized yeeJ domain protein                                                                              | Escherichia coli 3431                             |
|        | 19320   | 1184444                    | F1ZIR7        | Putative uncharacterized protein                                                                                 | Escherichia coli STEC_7v                          |
|        | 83598   | 1188103                    | B7L909        | Shikimate transporter                                                                                            | Escherichia coli (strain 55989 / EAEC)            |
|        | 114088  | 1189521                    | B7L910        | AMP nucleosidase (EC 3.2.2.4)                                                                                    | Escherichia coli (strain 55989 / EAEC)            |
|        | 114089  | 1191318                    | B7L911        | UPF0082 protein yeeN 2                                                                                           | Escherichia coli (strain 55989 / EAEC)            |
|        | 29322   | 1192374                    | A1ACI3        | Putative uncharacterized protein                                                                                 | Escherichia coli O1:K1 / APEC                     |
| r402   | 1192561 | 1192486 TY-2482_chromosome | ref NC_010473 | :2151292-2151367 Asn tRNA  [gene=asnV] [locus_tag=ECDH10B_2133]                                                  |                                                   |
|        | 112766  | 1194302                    | B7L912        | Putative Na <sup>+</sup> -driven multidrug efflux system                                                         | Escherichia coli (strain 55989 / EAEC)            |
| r400   | 1194310 | 1194385 TY-2482_chromosome | ref NC_010473 | :2151292-2151367 Asn tRNA  [gene=asnV] [locus_tag=ECDH10B_2133]                                                  |                                                   |
|        | 95626   | 1195373                    | B7L913        | DNA-binding transcriptional activator of cysteine biosynthesis                                                   | Escherichia coli (strain 55989 / EAEC)            |
|        | 61810   | 1196392                    | B7L914        | DNA-binding transcriptional dual regulator of nitrogen assimilation                                              | Escherichia coli (strain 55989 / EAEC)            |
| r401   | 1196719 | 1196794 TY-2482_chromosome | ref NC_010473 | :2151292-2151367 Asn tRNA  [gene=asnV] [locus_tag=ECDH10B_2133]                                                  |                                                   |
|        | 76517   | 1197782                    | B7L915        | Putative uncharacterized protein erfK                                                                            | Escherichia coli (strain 55989 / EAEC)            |
|        | 30371   | 1198926                    | B7L916        | Nicotinate-nucleotide--dimethylbenzimidazole phosphoribosyltransferase (NN:DBI PRT) (EC 2.4.2.21) (N1)-alpha-pho | Escherichia coli (strain 55989 / EAEC)            |
|        | 30368   | 1199681                    | B7L917        | Cobalamin synthase (EC 2.-.-.-)                                                                                  | Escherichia coli (strain 55989 / EAEC)            |
|        | 75287   | 1200223                    | B7L918        | Bifunctional cobinamide kinase and cobinamide phosphate guanylyltransferase                                      | Escherichia coli (strain 55989 / EAEC)            |
|        | 20921   | 1200852                    | D8CLM5        | Conserved domain protein                                                                                         | Escherichia coli MS 185-1                         |
|        | 9353    | 1201798                    | Q6EZC1        | L0015-like protein                                                                                               | Escherichia coli                                  |
|        | 71526   | 1202286                    | B7L922        | Putative carbohydrate kinase (EC 2.7.1.15)                                                                       | Escherichia coli (strain 55989 / EAEC)            |
|        | 112254  | 1203514                    | B7L923        | Putative uncharacterized protein                                                                                 | Escherichia coli (strain 55989 / EAEC)            |
|        | 15666   | 1204329                    | C2DPG0        | Membrane protein                                                                                                 | Escherichia coli 83972                            |
|        | 99192   | 1205297                    | B7L926        | Putative phosphotriesterase-related protein (EC 3.1.8.1)                                                         | Escherichia coli (strain 55989 / EAEC)            |
|        | 71619   | 1206699                    | D3GYL6        | Gamma-glutamyltranspeptidase (Fragment)                                                                          | Escherichia coli O44:H18 (strain 042 / EAEC)      |
|        | 91847   | 1208362                    | B7L930        | Putative transposase, ISL3 family                                                                                | Escherichia coli (strain 55989 / EAEC)            |
|        | 77472   | 1209143                    | B7L931        | Putative uncharacterized protein                                                                                 | Escherichia coli (strain 55989 / EAEC)            |
|        | 26506   | 1209411                    | A7ZVI3        | Putative uncharacterized protein                                                                                 | Escherichia coli O139:H28 (strain E24377A / ETEC) |
|        | 91957   | 1209451                    | B7L932        | Putative uncharacterized protein                                                                                 | Escherichia coli (strain 55989 / EAEC)            |
|        | 19075   | 1210748                    | E9TFH8        | Putative uncharacterized protein                                                                                 | Escherichia coli MS 117-3                         |
|        | 26050   | 1211074                    | Q0TGB3        | Putative uncharacterized protein                                                                                 | Escherichia coli O6:K15:H31 (strain 536 / UPEC)   |

|        |         |                            |        |                                                                                                                |                                                          |
|--------|---------|----------------------------|--------|----------------------------------------------------------------------------------------------------------------|----------------------------------------------------------|
| 64210  | 1211600 | 1212004 TY-2482_chromosome | B7L934 | Putative uncharacterized protein                                                                               | Escherichia coli (strain 55989 / EAEC)                   |
| 64752  | 1211628 | 1211395 TY-2482_chromosome | C8U534 | Putative uncharacterized protein                                                                               | Escherichia coli O103:H2 (strain 12009 / EHEC)           |
| 75581  | 1211947 | 1212700 TY-2482_chromosome | C8TTS1 | Conserved predicted protein                                                                                    | Escherichia coli O26:H11 (strain 11368 / EHEC)           |
| 81070  | 1213131 | 1213388 TY-2482_chromosome | B7L936 | Putative uncharacterized protein                                                                               | Escherichia coli (strain 55989 / EAEC)                   |
| 104857 | 1215197 | 1213665 TY-2482_chromosome | B7L938 | Putative transposase ORF 1, IS66 family                                                                        | Escherichia coli (strain 55989 / EAEC)                   |
| 77474  | 1215594 | 1215250 TY-2482_chromosome | B7L939 | Putative transposase ORF 2, IS66 family                                                                        | Escherichia coli (strain 55989 / EAEC)                   |
| 18624  | 1215974 | 1215594 TY-2482_chromosome | D8AYZ0 | Transposase                                                                                                    | Escherichia coli MS 175-1                                |
| 11094  | 1216020 | 1216335 TY-2482_chromosome | D8APM5 | Conserved domain protein                                                                                       | Escherichia coli MS 116-1                                |
| 22710  | 1216531 | 1216325 TY-2482_chromosome | D7ZIU0 | Putative uncharacterized protein                                                                               | Escherichia coli MS 69-1                                 |
| 27111  | 1216960 | 1216568 TY-2482_chromosome | Q0TGA2 | Putative uncharacterized protein                                                                               | Escherichia coli O6:K15:H31 (strain 536 / UPEC)          |
| 104404 | 1217530 | 1218690 TY-2482_chromosome | B7L940 | Putative uncharacterized protein                                                                               | Escherichia coli (strain 55989 / EAEC)                   |
| 104656 | 1218660 | 1219645 TY-2482_chromosome | C8TV65 | Putative uncharacterized protein                                                                               | Escherichia coli O26:H11 (strain 11368 / EHEC)           |
| 90075  | 1219866 | 1222259 TY-2482_chromosome | B7L943 | Putative uncharacterized protein                                                                               | Escherichia coli (strain 55989 / EAEC)                   |
| 69909  | 1222259 | 1223161 TY-2482_chromosome | B7L944 | Putative uncharacterized protein                                                                               | Escherichia coli (strain 55989 / EAEC)                   |
| 86491  | 1223161 | 1224228 TY-2482_chromosome | B7L945 | Putative uncharacterized protein                                                                               | Escherichia coli (strain 55989 / EAEC)                   |
| 90292  | 1224259 | 1225047 TY-2482_chromosome | B7L946 | Putative uncharacterized protein                                                                               | Escherichia coli (strain 55989 / EAEC)                   |
| 79178  | 1225066 | 1225473 TY-2482_chromosome | B7L947 | Putative uncharacterized protein                                                                               | Escherichia coli (strain 55989 / EAEC)                   |
| 20593  | 1225709 | 1225476 TY-2482_chromosome | D8EDM2 | Conserved domain protein                                                                                       | Escherichia coli MS 119-7                                |
| 26662  | 1226545 | 1225706 TY-2482_chromosome | B2TXM8 | Putative uncharacterized protein                                                                               | Shigella boydii serotype 18 (strain CDC 3083-94 / BSS12) |
| 47872  | 1227559 | 1226588 TY-2482_chromosome | Q5K5L6 | Putative uncharacterized protein                                                                               | Escherichia coli                                         |
| 22615  | 1228180 | 1228756 TY-2482_chromosome | E9TQB2 | Conserved domain protein (Fragment)                                                                            | Escherichia coli MS 60-1                                 |
| 21993  | 1228759 | 1229073 TY-2482_chromosome | D7YLU2 | Conserved domain protein                                                                                       | Escherichia coli MS 182-1                                |
| 7929   | 1229391 | 1229744 TY-2482_chromosome | Q1RA65 | Uncharacterized protein yoeF                                                                                   | Escherichia coli (strain UT189 / UPEC)                   |
| 60812  | 1230243 | 1229851 TY-2482_chromosome | B7L9N3 | Putative uncharacterized protein yeeX                                                                          | Escherichia coli (strain 55989 / EAEC)                   |
| 97818  | 1230882 | 1230352 TY-2482_chromosome | C8U552 | Conserved predicted inner membrane protein                                                                     | Escherichia coli O103:H2 (strain 12009 / EHEC)           |
| 115754 | 1231942 | 1230965 TY-2482_chromosome | B7LF78 | Transposase, IS110 family                                                                                      | Escherichia coli (strain 55989 / EAEC)                   |
| 110225 | 1232686 | 1232009 TY-2482_chromosome | B3WPJ5 | Inner membrane protein YeeA                                                                                    | Escherichia coli B171                                    |
| 23469  | 1233384 | 1232887 TY-2482_chromosome | D886I8 | Bacterial transcription activator, effector binding domain protein (Fragment)                                  | Escherichia coli MS 175-1                                |
| 60863  | 1234642 | 1233479 TY-2482_chromosome | B7L9N6 | D-alanyl-D-alanine carboxypeptidase (Penicillin-binding protein 6b) (EC 3.4.16.4)                              | Escherichia coli (strain 55989 / EAEC)                   |
| 88388  | 1234851 | 1236275 TY-2482_chromosome | B7L9N7 | Exonuclease I (EC 3.1.11.1)                                                                                    | Escherichia coli (strain 55989 / EAEC)                   |
| 88389  | 1236548 | 1236324 TY-2482_chromosome | B7L9N8 | Putative uncharacterized protein yeeD                                                                          | Escherichia coli (strain 55989 / EAEC)                   |
| 79565  | 1237620 | 1236565 TY-2482_chromosome | B7L9N9 | Putative uncharacterized protein yeeE                                                                          | Escherichia coli (strain 55989 / EAEC)                   |
| 115224 | 1239157 | 1237802 TY-2482_chromosome | B7L9P0 | Putative amino-acid/amine transporter                                                                          | Escherichia coli (strain 55989 / EAEC)                   |
| 91891  | 1240353 | 1239427 TY-2482_chromosome | B7L9P1 | Putative DNA-binding transcriptional regulator                                                                 | Escherichia coli (strain 55989 / EAEC)                   |
| 66367  | 1241223 | 1240402 TY-2482_chromosome | B7L9P2 | Putative epimerase, with NAD(P)-binding Rossmann-fold domain                                                   | Escherichia coli (strain 55989 / EAEC)                   |
| 69998  | 1241560 | 1241309 TY-2482_chromosome | B7L9P3 | Toxin of the YoeB-YefM toxin-antitoxin system                                                                  | Escherichia coli (strain 55989 / EAEC)                   |
| 73408  | 1241835 | 1241560 TY-2482_chromosome | A1ACN0 | Antitoxin of the YoeB-YefM toxin-antitoxin system                                                              | Escherichia coli O1:K1 / APEC                            |
| 31381  | 1242288 | 1243184 TY-2482_chromosome | B7L9P6 | ATP phosphoribosyltransferase (ATP-PRT) (ATP-PRTase) (EC 2.4.2.17)                                             | Escherichia coli (strain 55989 / EAEC)                   |
| 79888  | 1243193 | 1244494 TY-2482_chromosome | B7L9P7 | Histidinol dehydrogenase (HDH) (EC 1.1.1.23)                                                                   | Escherichia coli (strain 55989 / EAEC)                   |
| 31399  | 1244494 | 1245561 TY-2482_chromosome | B7L9P8 | Histidinol-phosphate aminotransferase (EC 2.6.1.9) (Imidazole acetol-phosphate transaminase)                   | Escherichia coli (strain 55989 / EAEC)                   |
| 105393 | 1245564 | 1246628 TY-2482_chromosome | B7L9P9 | Fused histidinol-phosphatase ; imidazoleglycerol-phosphate dehydratase (EC 3.1.3.15) (EC 4.2.1.19)             | Escherichia coli (strain 55989 / EAEC)                   |
| 68710  | 1246631 | 1247218 TY-2482_chromosome | B7L9Q0 | Imidazole glycerol phosphate synthase, glutamine amidotransferase subunit with HisF (EC 2.4.2.-)               | Escherichia coli (strain 55989 / EAEC)                   |
| 31387  | 1247221 | 1247955 TY-2482_chromosome | B7L9Q1 | 1-(5-phosphoribosyl)-5-[(5-phosphoribosylamino)methylideneamino]imidazole-4-carboxamide isomerase (EC 5.3.1.1) | Escherichia coli (strain 55989 / EAEC)                   |
| 31393  | 1247940 | 1248713 TY-2482_chromosome | B7L9Q2 | Imidazole glycerol phosphate synthase subunit hisF (EC 4.1.3.-) (IGP synthase cyclase subunit)                 | Escherichia coli (strain 55989 / EAEC)                   |
| 81014  | 1248710 | 1249318 TY-2482_chromosome | B7L9Q3 | Fused phosphoribosyl-AMP cyclohydrolase ; phosphoribosyl-ATP pyrophosphatase (EC 3.5.4.19) (EC 3.6.1.31)       | Escherichia coli (strain 55989 / EAEC)                   |
| 66258  | 1250399 | 1249422 TY-2482_chromosome | B7L9Q4 | Regulator of length of O-antigen component of lipopolysaccharide chain:                                        | Escherichia coli (strain 55989 / EAEC)                   |
| 114040 | 1251709 | 1250546 TY-2482_chromosome | B7L9Q5 | UDP-glucose 6-dehydrogenase (EC 1.1.1.22)                                                                      | Escherichia coli (strain 55989 / EAEC)                   |
| 81015  | 1253363 | 1251960 TY-2482_chromosome | B7L9Q6 | 6-phosphogluconate dehydrogenase, decarboxylating (EC 1.1.1.44)                                                | Escherichia coli (strain 55989 / EAEC)                   |
| 108192 | 1254302 | 1253487 TY-2482_chromosome | B7L9Q7 | Glycosyl transferase, putative                                                                                 | Escherichia coli (strain 55989 / EAEC)                   |
| 115408 | 1255610 | 1254318 TY-2482_chromosome | B7L9Q8 | Wzx                                                                                                            | Escherichia coli (strain 55989 / EAEC)                   |
| 71810  | 1256815 | 1255595 TY-2482_chromosome | B7L9Q9 | WbwB                                                                                                           | Escherichia coli (strain 55989 / EAEC)                   |
| 19996  | 1257933 | 1256824 TY-2482_chromosome | Q93NP8 | Wzy                                                                                                            | Escherichia coli                                         |
| 102860 | 1258880 | 1257933 TY-2482_chromosome | B7L9R0 | Putative uncharacterized protein                                                                               | Escherichia coli (strain 55989 / EAEC)                   |
| 104459 | 1260128 | 1258968 TY-2482_chromosome | B7L9R1 | NnaA                                                                                                           | Escherichia coli (strain 55989 / EAEC)                   |
| 66267  | 1261390 | 1260128 TY-2482_chromosome | B7L9R2 | NnaC (EC 2.7.7.43)                                                                                             | Escherichia coli (strain 55989 / EAEC)                   |
| 106402 | 1262436 | 1261399 TY-2482_chromosome | B7L9R3 | NnaB (EC 2.5.1.57)                                                                                             | Escherichia coli (strain 55989 / EAEC)                   |
| 67967  | 1263061 | 1262444 TY-2482_chromosome | B7L9R4 | WckD                                                                                                           | Escherichia coli (strain 55989 / EAEC)                   |
| 94999  | 1264315 | 1263425 TY-2482_chromosome | B7L9R5 | Putative subunit with GalU                                                                                     | Escherichia coli (strain 55989 / EAEC)                   |
| 116017 | 1265553 | 1264561 TY-2482_chromosome | B7L9R6 | UDP-N-acetylglucosamine 4-epimerase (UDP-GlcNAc 4-epimerase) (EC 5.1.3.7)                                      | Escherichia coli (strain 55989 / EAEC)                   |
| 106403 | 1267105 | 1265714 TY-2482_chromosome | B7L9R7 | Putative colanic acid biosynthesis protein                                                                     | Escherichia coli (strain 55989 / EAEC)                   |
| 64475  | 1268336 | 1267119 TY-2482_chromosome | B7L9R8 | Putative glycosyl transferase                                                                                  | Escherichia coli (strain 55989 / EAEC)                   |
| 66268  | 1269613 | 1268336 TY-2482_chromosome | B7L9R9 | Putative pyruvyl transferase                                                                                   | Escherichia coli (strain 55989 / EAEC)                   |
| 16010  | 1269893 | 1269624 TY-2482_chromosome | E116L3 | Putative uncharacterized protein                                                                               | Escherichia coli MS 78-1                                 |
| 82363  | 1271376 | 1269901 TY-2482_chromosome | B7L9S0 | Colanic acid exporter                                                                                          | Escherichia coli (strain 55989 / EAEC)                   |

|        |         |                            |                                                                        |                                                                                                                    |                                                  |
|--------|---------|----------------------------|------------------------------------------------------------------------|--------------------------------------------------------------------------------------------------------------------|--------------------------------------------------|
| 114046 | 1272772 | 1271381 TY-2482_chromosome | B7L9S1                                                                 | Putative UDP-sugar lipid carrier transferase                                                                       | Escherichia coli (strain 55989 / EAEC)           |
| 84535  | 1274197 | 1272830 TY-2482_chromosome | B7L9S2                                                                 | Phosphomannomutase (EC 5.4.2.8)                                                                                    | Escherichia coli (strain 55989 / EAEC)           |
| 60970  | 1276090 | 1274657 TY-2482_chromosome | B7L9S3                                                                 | Mannose-1-phosphate guanylyltransferase (EC 2.7.7.22)                                                              | Escherichia coli (strain 55989 / EAEC)           |
| 108497 | 1277316 | 1276096 TY-2482_chromosome | B7L9S4                                                                 | Putative glycosyl transferase                                                                                      | Escherichia coli (strain 55989 / EAEC)           |
| 67752  | 1277792 | 1277316 TY-2482_chromosome | B7L9S5                                                                 | GDP-mannose mannosyl hydrolase (EC 1.1.1.271)                                                                      | Escherichia coli (strain 55989 / EAEC)           |
| 105113 | 1278760 | 1277798 TY-2482_chromosome | B7L9S6                                                                 | Bifunctional GDP-fucose synthetase: GDP-4-dehydro-6-deoxy-D-mannose epimerase and GDP-4-dehydro-6-L-deoxy-         | Escherichia coli (strain 55989 / EAEC)           |
| 113176 | 1279884 | 1278766 TY-2482_chromosome | B7L9S7                                                                 | GDP-D-mannose dehydratase, NAD(P)-binding (EC 4.2.1.47)                                                            | Escherichia coli (strain 55989 / EAEC)           |
| 73309  | 1280459 | 1279914 TY-2482_chromosome | B7L9S8                                                                 | Putative glycosyl transferase                                                                                      | Escherichia coli (strain 55989 / EAEC)           |
| 102841 | 1281221 | 1280478 TY-2482_chromosome | B7L9S9                                                                 | Putative glycosyl transferase                                                                                      | Escherichia coli (strain 55989 / EAEC)           |
| 86059  | 1282449 | 1281235 TY-2482_chromosome | B7L9T0                                                                 | Putative colanic acid polymerase                                                                                   | Escherichia coli (strain 55989 / EAEC)           |
| 99114  | 1283641 | 1282427 TY-2482_chromosome | B7L9T1                                                                 | Putative glycosyl transferase                                                                                      | Escherichia coli (strain 55989 / EAEC)           |
| 88392  | 1284126 | 1283641 TY-2482_chromosome | B7L9T2                                                                 | Putative acyl transferase                                                                                          | Escherichia coli (strain 55989 / EAEC)           |
| 89942  | 1284968 | 1284132 TY-2482_chromosome | B7L9T3                                                                 | Putative glycosyl transferase                                                                                      | Escherichia coli (strain 55989 / EAEC)           |
| 95580  | 1287308 | 1285149 TY-2482_chromosome | B7L9T4                                                                 | Protein-tyrosine kinase (EC 2.7.10.2)                                                                              | Escherichia coli (strain 55989 / EAEC)           |
| 70013  | 1287754 | 1287314 TY-2482_chromosome | B7L9T5                                                                 | Protein-tyrosine phosphatase (EC 3.1.3.48)                                                                         | Escherichia coli (strain 55989 / EAEC)           |
| 95582  | 1288899 | 1287763 TY-2482_chromosome | B7L9T6                                                                 | Lipoprotein required for capsular polysaccharide translocation through the outer membrane                          | Escherichia coli (strain 55989 / EAEC)           |
| 88393  | 1289558 | 1291138 TY-2482_chromosome | B7L9T7                                                                 | Fused putative membrane protein ; putative membrane protein                                                        | Escherichia coli (strain 55989 / EAEC)           |
| 108635 | 1293268 | 1291418 TY-2482_chromosome | B7L9T8                                                                 | Putative inner membrane protein involved in outer membrane protein assembly                                        | Escherichia coli (strain 55989 / EAEC)           |
| 30557  | 1293871 | 1293293 TY-2482_chromosome | B7L9T9                                                                 | Deoxycytidine triphosphate deaminase (dCTP deaminase) (EC 3.5.4.13)                                                | Escherichia coli (strain 55989 / EAEC)           |
| 110392 | 1294604 | 1293966 TY-2482_chromosome | B7L9U0                                                                 | Uridine kinase (EC 2.7.1.48) (Cytidine monophosphokinase) (Uridine monophosphokinase)                              | Escherichia coli (strain 55989 / EAEC)           |
| 112782 | 1294922 | 1298236 TY-2482_chromosome | B7L9U1                                                                 | Putative diguanylate cyclase, GGDEF domain signalling protein                                                      | Escherichia coli (strain 55989 / EAEC)           |
| 105170 | 1299135 | 1298281 TY-2482_chromosome | B7L9U2                                                                 | 3-methyl-adenine DNA glycosylase II (EC 3.2.2.21)                                                                  | Escherichia coli (strain 55989 / EAEC)           |
| 68173  | 1299269 | 1300618 TY-2482_chromosome | B7L9U3                                                                 | Putative chaperone                                                                                                 | Escherichia coli (strain 55989 / EAEC)           |
| 112012 | 1302582 | 1300636 TY-2482_chromosome | B7L9U4                                                                 | Putative uncharacterized protein yegI                                                                              | Escherichia coli (strain 55989 / EAEC)           |
| 91905  | 1303331 | 1302573 TY-2482_chromosome | B7L9U5                                                                 | Putative uncharacterized protein yegK                                                                              | Escherichia coli (strain 55989 / EAEC)           |
| 106513 | 1303987 | 1303331 TY-2482_chromosome | B7L9U6                                                                 | Putative uncharacterized protein yegL                                                                              | Escherichia coli (strain 55989 / EAEC)           |
| r116   | 1304134 | 1304282 TY-2482_chromosome | ref NC_010473 :2242307-2242455 -  [gene=ryeC] [locus_tag=ECDH10B_2224] |                                                                                                                    |                                                  |
| r118   | 1304469 | 1304611 TY-2482_chromosome | ref NC_010473 :2242642-2242784 -  [gene=ryeD] [locus_tag=ECDH10B_2225] |                                                                                                                    |                                                  |
| r119   | 1304797 | 1304939 TY-2482_chromosome | ref NC_010473 :2242642-2242784 -  [gene=ryeD] [locus_tag=ECDH10B_2225] |                                                                                                                    |                                                  |
| 32124  | 1305203 | 1306447 TY-2482_chromosome | B7L9U7                                                                 | Multidrug resistance protein mdtA (Multidrug transporter mdtA)                                                     | Escherichia coli (strain 55989 / EAEC)           |
| 32134  | 1306450 | 1309569 TY-2482_chromosome | B7L9U8                                                                 | Multidrug resistance protein MdtB (Multidrug transporter MdtB)                                                     | Escherichia coli (strain 55989 / EAEC)           |
| 32166  | 1309573 | 1312647 TY-2482_chromosome | B7L9U9                                                                 | Multidrug resistance protein MdtC (Multidrug transporter MdtC)                                                     | Escherichia coli (strain 55989 / EAEC)           |
| 32198  | 1312651 | 1314063 TY-2482_chromosome | B7L9V0                                                                 | Putative multidrug resistance protein mdtD                                                                         | Escherichia coli (strain 55989 / EAEC)           |
| 110393 | 1314063 | 1315463 TY-2482_chromosome | B7L9V1                                                                 | Sensory histidine kinase in two-component regulatory system with BaeR                                              | Escherichia coli (strain 55989 / EAEC)           |
| 59122  | 1315463 | 1316182 TY-2482_chromosome | B7L9V2                                                                 | DNA-binding response regulator in two-component regulatory system with BaeS                                        | Escherichia coli (strain 55989 / EAEC)           |
| 90219  | 1316376 | 1316705 TY-2482_chromosome | B7L9V3                                                                 | Putative uncharacterized protein yegP                                                                              | Escherichia coli (strain 55989 / EAEC)           |
| 76832  | 1316917 | 1317210 TY-2482_chromosome | B7L9V4                                                                 | Putative uncharacterized protein                                                                                   | Escherichia coli (strain 55989 / EAEC)           |
| 79461  | 1317215 | 1317508 TY-2482_chromosome | B7L9V5                                                                 | Putative uncharacterized protein                                                                                   | Escherichia coli (strain 55989 / EAEC)           |
| 101214 | 1317614 | 1318972 TY-2482_chromosome | B7L9V6                                                                 | Putative peptidase                                                                                                 | Escherichia coli (strain 55989 / EAEC)           |
| r227   | 1319058 | 1319143 TY-2482_chromosome | ref NC_010473 :2256144-2256229 -  [gene=ryeE] [locus_tag=ECDH10B_2234] |                                                                                                                    |                                                  |
| 107696 | 1319682 | 1319260 TY-2482_chromosome | D3GZE6                                                                 | Putative uncharacterized protein                                                                                   | Escherichia coli O44:H18 (strain 042 / EAEC)     |
| 34887  | 1320037 | 1320933 TY-2482_chromosome | B7L9V9                                                                 | Probable lipid kinase YegS (EC 2.7.1.-)                                                                            | Escherichia coli (strain 55989 / EAEC)           |
| 83802  | 1321797 | 1321021 TY-2482_chromosome | B7L9W0                                                                 | Galactitol utilization operon repressor                                                                            | Escherichia coli (strain 55989 / EAEC)           |
| 102893 | 1322937 | 1321900 TY-2482_chromosome | B7L9W1                                                                 | Galactitol-1-phosphate dehydrogenase, Zn-dependent and NAD(P)-binding (EC 1.1.1.251)                               | Escherichia coli (strain 55989 / EAEC)           |
| 77412  | 1324340 | 1322988 TY-2482_chromosome | B7L9W2                                                                 | Galactitol-specific enzyme IIC component of PTS                                                                    | Escherichia coli (strain 55989 / EAEC)           |
| 101548 | 1324628 | 1324347 TY-2482_chromosome | B7L9W3                                                                 | Galactitol-specific enzyme IIB component of PTS (EC 2.7.1.69)                                                      | Escherichia coli (strain 55989 / EAEC)           |
| 108566 | 1325111 | 1324662 TY-2482_chromosome | B7L9W4                                                                 | Galactitol-specific enzyme IIA component of PTS (EC 2.7.1.69)                                                      | Escherichia coli (strain 55989 / EAEC)           |
| 106591 | 1326378 | 1325124 TY-2482_chromosome | C6V111                                                                 | D-tagatose-1,6-bisphosphate aldolase subunit gatZ                                                                  | Escherichia coli O157:H7 (strain TW14359 / EHEC) |
| 31074  | 1327261 | 1326410 TY-2482_chromosome | B7L9W7                                                                 | D-tagatose-1,6-bisphosphate aldolase subunit GatY (TBPA) (TagBP aldolase) (EC 4.1.2.40) (D-tagatose-bisphosphate a | Escherichia coli (strain 55989 / EAEC)           |
| 80956  | 1328623 | 1327574 TY-2482_chromosome | B7L9W8                                                                 | Fructose-bisphosphate aldolase class I (EC 4.1.2.13)                                                               | Escherichia coli (strain 55989 / EAEC)           |
| 102225 | 1328880 | 1330154 TY-2482_chromosome | B7L9W9                                                                 | Putative hydrophilic substrate transporter; MFS superfamily                                                        | Escherichia coli (strain 55989 / EAEC)           |
| 59127  | 1330154 | 1331155 TY-2482_chromosome | B7L9X0                                                                 | Putative (Phospho)hydrolase                                                                                        | Escherichia coli (strain 55989 / EAEC)           |
| 91906  | 1331155 | 1332117 TY-2482_chromosome | B7L9X1                                                                 | Putative kinase                                                                                                    | Escherichia coli (strain 55989 / EAEC)           |
| 98180  | 1332840 | 1332097 TY-2482_chromosome | B7L9X2                                                                 | Putative DNA-binding transcriptional regulator                                                                     | Escherichia coli (strain 55989 / EAEC)           |
| 18219  | 1333738 | 1332895 TY-2482_chromosome | E7IBA7                                                                 | Glycosyl hydrolases family 25 family protein                                                                       | Escherichia coli LT-68                           |
| 78969  | 1334575 | 1333778 TY-2482_chromosome | B7L9X4                                                                 | Bifunctional hydroxy-methylpyrimidine kinase and hydroxy-phosphomethylpyrimidine kinase (EC 2.7.1.49) (EC 2.7.4.7  | Escherichia coli (strain 55989 / EAEC)           |
| 34260  | 1335360 | 1334575 TY-2482_chromosome | B7L9X5                                                                 | Hydroxyethylthiazole kinase (EC 2.7.1.50) (4-methyl-5-beta-hydroxyethylthiazole kinase) (TH kinase) (Thz kinase)   | Escherichia coli (strain 55989 / EAEC)           |
| 16995  | 1335391 | 1335594 TY-2482_chromosome | E11695                                                                 | Putative uncharacterized protein                                                                                   | Escherichia coli MS 78-1                         |
| 82977  | 1335855 | 1335586 TY-2482_chromosome | B7L9X6                                                                 | Putative uncharacterized protein yohL                                                                              | Escherichia coli (strain 55989 / EAEC)           |
| 99141  | 1335976 | 1336797 TY-2482_chromosome | B7L9X7                                                                 | Nickel and cobalt resistance                                                                                       | Escherichia coli (strain 55989 / EAEC)           |
| 102896 | 1336839 | 1337354 TY-2482_chromosome | B7L9X8                                                                 | Putative uncharacterized protein yohN                                                                              | Escherichia coli (strain 55989 / EAEC)           |
| 110652 | 1338473 | 1337442 TY-2482_chromosome | B7L9X9                                                                 | Putative exported fimbrial-like adhesin protein                                                                    | Escherichia coli (strain 55989 / EAEC)           |
| 62664  | 1340969 | 1338492 TY-2482_chromosome | B7L9Y0                                                                 | Putative uncharacterized protein yehB                                                                              | Escherichia coli (strain 55989 / EAEC)           |
| 6882   | 1341692 | 1340988 TY-2482_chromosome | P33342                                                                 | Uncharacterized fimbrial chaperone yehC                                                                            | Escherichia coli (strain K12)                    |

|        |         |                            |        |                                                                                                      |                                                  |
|--------|---------|----------------------------|--------|------------------------------------------------------------------------------------------------------|--------------------------------------------------|
| 99142  | 1342282 | 1341743 TY-2482_chromosome | B7L9Y3 | Putative fimbrial-like adhesin protein                                                               | Escherichia coli (strain 55989 / EAEC)           |
| 90223  | 1342856 | 1342578 TY-2482_chromosome | B7L9Y4 | Putative uncharacterized protein yehE                                                                | Escherichia coli (strain 55989 / EAEC)           |
| 93254  | 1344228 | 1343122 TY-2482_chromosome | B7L9Y5 | Antiporter inner membrane protein                                                                    | Escherichia coli (strain 55989 / EAEC)           |
| 34153  | 1344360 | 1346390 TY-2482_chromosome | B7L9Y6 | Methionyl-tRNA synthetase (EC 6.1.1.10) (Methionine--tRNA ligase) (MetRS)                            | Escherichia coli (strain 55989 / EAEC)           |
| 100430 | 1346534 | 1350325 TY-2482_chromosome | D3GZY0 | Putative nucleic acid binding protein (Putative regulator)                                           | Escherichia coli O44:H18 (strain 042 / EAEC)     |
| 88988  | 1350332 | 1353967 TY-2482_chromosome | C8U658 | Conserved predicted protein                                                                          | Escherichia coli O103:H2 (strain 12009 / EHEC)   |
| 6887   | 1354031 | 1354345 TY-2482_chromosome | P33347 | Uncharacterized protein yehK                                                                         | Escherichia coli (strain K12)                    |
| 106062 | 1355588 | 1356673 TY-2482_chromosome | C8UD52 | Predicted transporter subunit                                                                        | Escherichia coli O111:H- (strain 11128 / EHEC)   |
| 99764  | 1356687 | 1358963 TY-2482_chromosome | C8U663 | Conserved predicted protein                                                                          | Escherichia coli O103:H2 (strain 12009 / EHEC)   |
| 99724  | 1358959 | 1360092 TY-2482_chromosome | C6V1M4 | Conserved protein                                                                                    | Escherichia coli O157:H7 (strain TW14359 / EHEC) |
| 114876 | 1360092 | 1362089 TY-2482_chromosome | C8TU47 | Conserved predicted protein                                                                          | Escherichia coli O26:H11 (strain 11368 / EHEC)   |
| 79002  | 1362205 | 1362675 TY-2482_chromosome | D3GZY8 | Putative exported protein                                                                            | Escherichia coli O44:H18 (strain 042 / EAEC)     |
| 17081  | 1363246 | 1362722 TY-2482_chromosome | D6IBS4 | YehS protein                                                                                         | Escherichia coli B185                            |
| 73595  | 1363955 | 1363239 TY-2482_chromosome | B7L9Z1 | Response regulator in two-component system with YehU                                                 | Escherichia coli (strain 55989 / EAEC)           |
| 104324 | 1365637 | 1363955 TY-2482_chromosome | B7L9Z2 | Sensory kinase in two-component system with YehT                                                     | Escherichia coli (strain 55989 / EAEC)           |
| 86186  | 1365859 | 1366587 TY-2482_chromosome | B7L9Z3 | DNA-binding transcriptional regulator                                                                | Escherichia coli (strain 55989 / EAEC)           |
| 17741  | 1366778 | 1366590 TY-2482_chromosome | D7YJ80 | Conserved domain protein                                                                             | Escherichia coli MS 182-1                        |
| 84581  | 1367469 | 1366741 TY-2482_chromosome | B7L9Z5 | Putative transporter subunit: permease component of ABC superfamily transporter                      | Escherichia coli (strain 55989 / EAEC)           |
| 93782  | 1368400 | 1367477 TY-2482_chromosome | B7L9Z6 | Putative transporter subunit: ATP-binding component of ABC superfamily transporter                   | Escherichia coli (strain 55989 / EAEC)           |
| 81020  | 1369550 | 1368396 TY-2482_chromosome | B7L9Z7 | Putative transporter subunit: permease component of ABC superfamily                                  | Escherichia coli (strain 55989 / EAEC)           |
| 75964  | 1370474 | 1369560 TY-2482_chromosome | B7L9Z8 | Putative transporter subunit: periplasmic-binding component of ABC superfamily                       | Escherichia coli (strain 55989 / EAEC)           |
| 91851  | 1372982 | 1370688 TY-2482_chromosome | B7L9Z9 | Beta-D-glucoside glucohydrolase, periplasmic (EC 3.2.1.21)                                           | Escherichia coli (strain 55989 / EAEC)           |
| 83904  | 1373178 | 1374890 TY-2482_chromosome | B7LA00 | D-lactate dehydrogenase, FAD-binding, NADH independent (EC 1.1.1.28)                                 | Escherichia coli (strain 55989 / EAEC)           |
| 81121  | 1375863 | 1374934 TY-2482_chromosome | B7LA01 | D-alanyl-D-alanine endopeptidase (EC 3.4.24.-)                                                       | Escherichia coli (strain 55989 / EAEC)           |
| 111904 | 1376648 | 1376040 TY-2482_chromosome | B5YW61 | Putative membrane protein                                                                            | Escherichia coli O157:H7 (strain EC4115 / EHEC)  |
| 101384 | 1376758 | 1377369 TY-2482_chromosome | D3H001 | Putative membrane protein                                                                            | Escherichia coli O44:H18 (strain 042 / EAEC)     |
| 102897 | 1378263 | 1377505 TY-2482_chromosome | B7LA04 | Putative oxidoreductase with NAD(P)-binding Rossmann-fold domain                                     | Escherichia coli (strain 55989 / EAEC)           |
| 91253  | 1379404 | 1378319 TY-2482_chromosome | B7LA05 | Putative uncharacterized protein yohG                                                                | Escherichia coli (strain 55989 / EAEC)           |
| 97353  | 1380069 | 1380398 TY-2482_chromosome | C6V2L9 | Putative uncharacterized protein                                                                     | Escherichia coli O157:H7 (strain TW14359 / EHEC) |
| 93255  | 1381379 | 1380435 TY-2482_chromosome | B7LA06 | tRNA-dihydrouridine synthase (EC 1.-.-.-)                                                            | Escherichia coli (strain 55989 / EAEC)           |
| 35043  | 1381618 | 1382013 TY-2482_chromosome | B7LA07 | UPF0299 membrane protein yohJ                                                                        | Escherichia coli (strain 55989 / EAEC)           |
| 94817  | 1382013 | 1382705 TY-2482_chromosome | B7LA08 | Putative uncharacterized protein yohK                                                                | Escherichia coli (strain 55989 / EAEC)           |
| 30270  | 1382838 | 1383719 TY-2482_chromosome | B7LA09 | Cytidine deaminase (EC 3.5.4.5) (Cytidine aminohydrolase) (CDA)                                      | Escherichia coli (strain 55989 / EAEC)           |
| 90366  | 1383872 | 1384588 TY-2482_chromosome | B7LA10 | Putative uncharacterized protein sanA                                                                | Escherichia coli (strain 55989 / EAEC)           |
| 115300 | 1384594 | 1384830 TY-2482_chromosome | B7LAG5 | Putative uncharacterized protein yehS                                                                | Escherichia coli (strain 55989 / EAEC)           |
| 110498 | 1385152 | 1386387 TY-2482_chromosome | B7LAG6 | Putative Fe-S cluster containing oxidoreductase subunit                                              | Escherichia coli (strain 55989 / EAEC)           |
| 66297  | 1386413 | 1387616 TY-2482_chromosome | B7LAG7 | Putative oxidoreductase subunit                                                                      | Escherichia coli (strain 55989 / EAEC)           |
| 87288  | 1388700 | 1387693 TY-2482_chromosome | B7LAG8 | Methyl-galactoside transporter subunit ; membrane component of ABC superfamily                       | Escherichia coli (strain 55989 / EAEC)           |
| 77489  | 1390236 | 1388719 TY-2482_chromosome | B7LAG9 | Fused methyl-galactoside transporter subunits of ABC superfamily: ATP-binding components             | Escherichia coli (strain 55989 / EAEC)           |
| 59187  | 1391295 | 1390300 TY-2482_chromosome | B7LAH0 | Methyl-galactoside transporter subunit ; periplasmic-binding component of ABC superfamily            | Escherichia coli (strain 55989 / EAEC)           |
| 95651  | 1392605 | 1392805 TY-2482_chromosome | B7LAH2 | Putative uncharacterized protein                                                                     | Escherichia coli (strain 55989 / EAEC)           |
| 81089  | 1392615 | 1391578 TY-2482_chromosome | B7LAH1 | DNA-binding transcriptional repressor                                                                | Escherichia coli (strain 55989 / EAEC)           |
| 65066  | 1393914 | 1392760 TY-2482_chromosome | B7LAH3 | Putative uncharacterized protein yehIb                                                               | Escherichia coli (strain 55989 / EAEC)           |
| 31085  | 1394599 | 1393934 TY-2482_chromosome | B7LAH4 | GTP cyclohydrolase 1 (EC 3.5.4.16) (GTP cyclohydrolase I) (GTP-CH-I)                                 | Escherichia coli (strain 55989 / EAEC)           |
| 102946 | 1394857 | 1395690 TY-2482_chromosome | B7LAH6 | S-formylglutathione hydrolase (EC 3.1.2.12)                                                          | Escherichia coli (strain 55989 / EAEC)           |
| 66298  | 1397716 | 1395728 TY-2482_chromosome | B7LAH7 | Ferric iron-catecholate outer membrane transporter                                                   | Escherichia coli (strain 55989 / EAEC)           |
| 106548 | 1397912 | 1397712 TY-2482_chromosome | B7LAH8 | Putative uncharacterized protein                                                                     | Escherichia coli (strain 55989 / EAEC)           |
| 75548  | 1399478 | 1398012 TY-2482_chromosome | B7LAH9 | Lysine transporter                                                                                   | Escherichia coli (strain 55989 / EAEC)           |
| 15748  | 1399644 | 1399465 TY-2482_chromosome | D7JPX3 | Predicted protein                                                                                    | Escherichia coli FVEC1302                        |
| 79987  | 1400564 | 1399686 TY-2482_chromosome | B7LAI0 | Putative DNA-binding transcriptional regulator                                                       | Escherichia coli (strain 55989 / EAEC)           |
| 66366  | 1400663 | 1401709 TY-2482_chromosome | B7LAI1 | Putative uncharacterized protein yehI                                                                | Escherichia coli (strain 55989 / EAEC)           |
| 30761  | 1401786 | 1402640 TY-2482_chromosome | B7LAI2 | Probable endonuclease 4 (EC 3.1.21.2) (Endodeoxyribonuclease IV) (Endonuclease IV)                   | Escherichia coli (strain 55989 / EAEC)           |
| 80547  | 1402647 | 1403732 TY-2482_chromosome | B7LAI3 | Putative kinase                                                                                      | Escherichia coli (strain 55989 / EAEC)           |
| 95652  | 1405041 | 1403794 TY-2482_chromosome | B7LAI4 | Putative sodium/proton nucleoside transporter                                                        | Escherichia coli (strain 55989 / EAEC)           |
| 33414  | 1406082 | 1405144 TY-2482_chromosome | B7LAI5 | Pyrimidine-specific ribonucleoside hydrolase rihB (EC 3.2.2.8) (Cytidine/uridine-specific hydrolase) | Escherichia coli (strain 55989 / EAEC)           |
| 83495  | 1406212 | 1406907 TY-2482_chromosome | B5YVW4 | Regulatory protein Nsr                                                                               | Escherichia coli O157:H7 (strain EC4115 / EHEC)  |
| 61803  | 1408228 | 1406981 TY-2482_chromosome | B7LAI7 | Putative sodium/proton nucleoside transporter                                                        | Escherichia coli (strain 55989 / EAEC)           |
| 64365  | 1409260 | 1408325 TY-2482_chromosome | B7LAI8 | Pseudouridine-5'-phosphate glycosidase (PsiMP glycosidase) (EC 3.2.-.-)                              | Escherichia coli (strain 55989 / EAEC)           |
| 58125  | 1410189 | 1409251 TY-2482_chromosome | B7LAI9 | Putative kinase                                                                                      | Escherichia coli (strain 55989 / EAEC)           |
| 79465  | 1412304 | 1410616 TY-2482_chromosome | B7LAI0 | Fused fructose-specific PTS enzymes: IIB component ; IIC components                                  | Escherichia coli (strain 55989 / EAEC)           |
| 61082  | 1413259 | 1412324 TY-2482_chromosome | B7LAI1 | Fructose-1-phosphate kinase (EC 2.7.1.56)                                                            | Escherichia coli (strain 55989 / EAEC)           |
| 86966  | 1414389 | 1413262 TY-2482_chromosome | B7LAI2 | Fused fructose-specific PTS enzymes: IIA component ; HPr component (EC 2.7.1.69)                     | Escherichia coli (strain 55989 / EAEC)           |
| 58070  | 1414757 | 1415935 TY-2482_chromosome | B7LAI3 | Lactose/glucose efflux system                                                                        | Escherichia coli (strain 55989 / EAEC)           |
| 22067  | 1416089 | 1416913 TY-2482_chromosome | D7YNX5 | Elongation factor P                                                                                  | Escherichia coli MS 182-1                        |

|        |         |                            |                                                                               |                                                                                                                 |                                                                    |
|--------|---------|----------------------------|-------------------------------------------------------------------------------|-----------------------------------------------------------------------------------------------------------------|--------------------------------------------------------------------|
| 95655  | 1417139 | 1418602 TY-2482_chromosome | B7LAJ6                                                                        | Putative sugar dehydrogenase, NAD-dependent                                                                     | Escherichia coli (strain 55989 / EAEC)                             |
| 86218  | 1418723 | 1419706 TY-2482_chromosome | B7LAJ7                                                                        | Putative enzyme                                                                                                 | Escherichia coli (strain 55989 / EAEC)                             |
| 62833  | 1419748 | 1420458 TY-2482_chromosome | B7LAJ8                                                                        | Undecaprenyl pyrophosphate phosphatase                                                                          | Escherichia coli (strain 55989 / EAEC)                             |
| 110503 | 1420873 | 1421436 TY-2482_chromosome | B7LAJ9                                                                        | Putative peptidase, outer membrane lipoprotein                                                                  | Escherichia coli (strain 55989 / EAEC)                             |
| 108821 | 1421620 | 1423173 TY-2482_chromosome | B7LAK0                                                                        | Putative uncharacterized protein rtn                                                                            | Escherichia coli (strain 55989 / EAEC)                             |
| 73809  | 1423258 | 1425069 TY-2482_chromosome | B7LAK1                                                                        | Putative oligopeptide transporter subunit ; periplasmic-binding component of ABC superfamily transport          | Escherichia coli (strain 55989 / EAEC)                             |
| 95658  | 1425073 | 1426164 TY-2482_chromosome | B7LAK2                                                                        | Putative oligopeptide transporter subunit; permease component of ABC superfamily                                | Escherichia coli (strain 55989 / EAEC)                             |
| 11575  | 1426167 | 1427189 TY-2482_chromosome | B7LAK3                                                                        | Putative oligopeptide transporter subunit ; permease component of ABC superfamily transporter                   | Escherichia coli (strain 55989 / EAEC)                             |
| 88341  | 1427194 | 1428780 TY-2482_chromosome | B7LAK4                                                                        | Putative fused oligopeptide transporter subunits of ABC superfamily: ATP-binding components                     | Escherichia coli (strain 55989 / EAEC)                             |
| 77384  | 1429131 | 1428790 TY-2482_chromosome | B7LAK5                                                                        | Putative uncharacterized protein yejG                                                                           | Escherichia coli (strain 55989 / EAEC)                             |
| 61806  | 1430654 | 1429467 TY-2482_chromosome | B7LAK6                                                                        | Bicyclomycin/multidrug efflux system                                                                            | Escherichia coli (strain 55989 / EAEC)                             |
| 83984  | 1431377 | 1430685 TY-2482_chromosome | B7LAK7                                                                        | Pseudouridine synthase (EC 5.4.99.-)                                                                            | Escherichia coli (strain 55989 / EAEC)                             |
| 108828 | 1431526 | 1433283 TY-2482_chromosome | B7LAK8                                                                        | Putative nucleic acid ATP-dependent helicase                                                                    | Escherichia coli (strain 55989 / EAEC)                             |
| 25835  | 1433827 | 1433399 TY-2482_chromosome | Q1R9N3                                                                        | Putative uncharacterized protein                                                                                | Escherichia coli (strain UT189 / UPEC)                             |
| 32642  | 1434841 | 1433837 TY-2482_chromosome | B7LAL0                                                                        | Nucleoid-associated protein YejK                                                                                | Escherichia coli (strain 55989 / EAEC)                             |
| 34893  | 1435023 | 1435247 TY-2482_chromosome | B7LAL1                                                                        | UPF0352 protein yejL                                                                                            | Escherichia coli (strain 55989 / EAEC)                             |
| 75116  | 1435270 | 1437027 TY-2482_chromosome | B7LAL2                                                                        | Putative hydrolase, inner membrane-associated                                                                   | Escherichia coli (strain 55989 / EAEC)                             |
| r287   | 1437105 | 1437181 TY-2482_chromosome | ref[NC_010473]:2375221-2375297 Pro tRNA   [gene=proL] [locus_tag=ECDH10B_2347 |                                                                                                                 |                                                                    |
| 113390 | 1439875 | 1437287 TY-2482_chromosome | B5YWY3                                                                        | Putative autotransporter, ISSK-containing                                                                       | Escherichia coli O157:H7 (strain EC4115 / EHEC)                    |
| 12995  | 1440163 | 1439909 TY-2482_chromosome | E2QP58                                                                        | Putative uncharacterized protein                                                                                | Escherichia coli                                                   |
| 95661  | 1440195 | 1440839 TY-2482_chromosome | B7LAL6                                                                        | DNA-binding response regulator in two-component regulatory system with NarQ or NarX                             | Escherichia coli (strain 55989 / EAEC)                             |
| 84643  | 1441929 | 1440880 TY-2482_chromosome | B7LAL7                                                                        | Heme lyase, CcmH subunit                                                                                        | Escherichia coli (strain 55989 / EAEC)                             |
| 27221  | 1442483 | 1441856 TY-2482_chromosome | Q0TFP6                                                                        | Thiol:disulfide interchange protein DsbE                                                                        | Escherichia coli O6:K15:H31 (strain 536 / UPEC)                    |
| 66368  | 1444423 | 1442483 TY-2482_chromosome | B7LAL9                                                                        | Heme lyase, CcmF subunit                                                                                        | Escherichia coli (strain 55989 / EAEC)                             |
| 30266  | 1444899 | 1444423 TY-2482_chromosome | B7LAM0                                                                        | Cytochrome c-type biogenesis protein CcmE (Cytochrome c maturation protein E) (Heme chaperone CcmE              | Escherichia coli (strain 55989 / EAEC)                             |
| 106549 | 1445105 | 1444899 TY-2482_chromosome | B7LAM1                                                                        | Cytochrome c biogenesis protein                                                                                 | Escherichia coli (strain 55989 / EAEC)                             |
| 109427 | 1445839 | 1445105 TY-2482_chromosome | B7LAM2                                                                        | Heme exporter subunit ; membrane component of ABC superfamily                                                   | Escherichia coli (strain 55989 / EAEC)                             |
| 114119 | 1446543 | 1445884 TY-2482_chromosome | B7LAM3                                                                        | Heme exporter subunit ; membrane component of ABC superfamily                                                   | Escherichia coli (strain 55989 / EAEC)                             |
| 94570  | 1447163 | 1446543 TY-2482_chromosome | B7LAM4                                                                        | Heme exporter subunit ; ATP-binding component of ABC superfamily                                                | Escherichia coli (strain 55989 / EAEC)                             |
| 94571  | 1447778 | 1447179 TY-2482_chromosome | B7LAM5                                                                        | Nitrate reductase, cytochrome c-type,periplasmic                                                                | Escherichia coli (strain 55989 / EAEC)                             |
| 61545  | 1449097 | 1448237 TY-2482_chromosome | B7LAM7                                                                        | Ferredoxin-type protein essential for electron transfer from ubiquinol to periplasmic nitrate reductase (NapAB  | Escherichia coli (strain 55989 / EAEC)                             |
| 69911  | 1449779 | 1449087 TY-2482_chromosome | B7LAM8                                                                        | Ferredoxin-type protein essential for electron transfer from ubiquinol to periplasmic nitrate reductase (NapAB  | Escherichia coli (strain 55989 / EAEC)                             |
| 32630  | 1452272 | 1449789 TY-2482_chromosome | B7LAM9                                                                        | Periplasmic nitrate reductase (EC 1.7.99.4)                                                                     | Escherichia coli (strain 55989 / EAEC)                             |
| 65362  | 1452532 | 1452272 TY-2482_chromosome | B7LAN0                                                                        | Assembly protein for periplasmic nitrate reductase                                                              | Escherichia coli (strain 55989 / EAEC)                             |
| 87785  | 1453016 | 1452525 TY-2482_chromosome | B7LAN1                                                                        | Ferredoxin-type protein, putative role in electron transfer to periplasmic nitrate reductase (NapA              | Escherichia coli (strain 55989 / EAEC)                             |
| 24044  | 1453125 | 1453336 TY-2482_chromosome | E0IY94                                                                        | Putative uncharacterized protein yojO                                                                           | Escherichia coli (strain ATCC 9637 / CCM 2024 / DSM 1116 / NCIMB 1 |
| 30721  | 1453424 | 1453909 TY-2482_chromosome | B7LAN3                                                                        | Ecotin                                                                                                          | Escherichia coli (strain 55989 / EAEC)                             |
| 32463  | 1455707 | 1454064 TY-2482_chromosome | B7LAN4                                                                        | Probable malate:quinone oxidoreductase (EC 1.1.5.4) (MQO) (Malate dehydrogenase [quinone]);                     | Escherichia coli (strain 55989 / EAEC)                             |
| 91979  | 1457568 | 1455928 TY-2482_chromosome | B7LAN5                                                                        | Fused multidrug transport subunits of ABC superfamily transporter: permease component/ATP-binding component     | Escherichia coli (strain 55989 / EAEC)                             |
| 113406 | 1458294 | 1457647 TY-2482_chromosome | B7LAN6                                                                        | Oxidative demethylase of N1-methyladenine or N3-methylcytosine DNA lesions                                      | Escherichia coli (strain 55989 / EAEC)                             |
| 84644  | 1459358 | 1458297 TY-2482_chromosome | B7LAN7                                                                        | Fused DNA-binding transcriptional dual regulator ; O6-methylguanine-DNA methyltransferase (EC 2.1.1.63)         | Escherichia coli (strain 55989 / EAEC)                             |
| 110653 | 1460487 | 1459435 TY-2482_chromosome | B7LAN8                                                                        | Putative thiamine biosynthesis lipoprotein; defective assembly or repair of ThiH Fe-S cluster                   | Escherichia coli (strain 55989 / EAEC)                             |
| 62632  | 1461702 | 1460602 TY-2482_chromosome | B7LAN9                                                                        | Outer membrane porin protein C                                                                                  | Escherichia coli (strain 55989 / EAEC)                             |
| 11425  | 1461983 | 1462207 TY-2482_chromosome | D6JC86                                                                        | Putative uncharacterized protein                                                                                | Escherichia coli B354                                              |
| r199   | 1462037 | 1462129 TY-2482_chromosome | ref[NC_010473]:2402094-2402186 -  [gene=micF] [locus_tag=ECDH10B_2373]        |                                                                                                                 |                                                                    |
| 62834  | 1462441 | 1465110 TY-2482_chromosome | B7LAP0                                                                        | Phosphotransfer intermediate protein in two-component regulatory system with RcsBC                              | Escherichia coli (strain 55989 / EAEC)                             |
| 81095  | 1465130 | 1465777 TY-2482_chromosome | B7LAP1                                                                        | DNA-binding response regulator in two-component regulatory system with RcsC and YojN                            | Escherichia coli (strain 55989 / EAEC)                             |
| 107975 | 1468781 | 1465983 TY-2482_chromosome | B7LAP2                                                                        | Hybrid sensory kinase in two-component regulatory system with RcsB and YojN                                     | Escherichia coli (strain 55989 / EAEC)                             |
| 104390 | 1469880 | 1469107 TY-2482_chromosome | B7LAP3                                                                        | Putative uncharacterized protein yfaP                                                                           | Escherichia coli (strain 55989 / EAEC)                             |
| 99212  | 1471534 | 1469888 TY-2482_chromosome | B7LAP4                                                                        | Putative uncharacterized protein yfaQ                                                                           | Escherichia coli (strain 55989 / EAEC)                             |
| 81096  | 1476154 | 1471538 TY-2482_chromosome | B7LAP5                                                                        | Putative large extracellular alpha-helical protein                                                              | Escherichia coli (strain 55989 / EAEC)                             |
| 88363  | 1476696 | 1476076 TY-2482_chromosome | B7LAP6                                                                        | Putative uncharacterized protein yfaT                                                                           | Escherichia coli (strain 55989 / EAEC)                             |
| 73676  | 1478381 | 1476696 TY-2482_chromosome | B7LAP7                                                                        | Putative uncharacterized protein yfaA                                                                           | Escherichia coli (strain 55989 / EAEC)                             |
| 91980  | 1481157 | 1478533 TY-2482_chromosome | B7LAP8                                                                        | DNA gyrase (Type II topoisomerase), subunit A (EC 5.99.1.3)                                                     | Escherichia coli (strain 55989 / EAEC)                             |
| 5655   | 1481304 | 1482023 TY-2482_chromosome | B7LAP9                                                                        | 3-demethylubiquinone-9 3-methyltransferase (EC 2.1.1.64) (3,4-dihydroxy-5-hexaprenylbenzoate methyltransferase) | Escherichia coli (strain 55989 / EAEC)                             |
| 98483  | 1485888 | 1482157 TY-2482_chromosome | B7LAP0                                                                        | Adhesin                                                                                                         | Escherichia coli (strain 55989 / EAEC)                             |
| 66302  | 1486584 | 1488866 TY-2482_chromosome | B7LAQ1                                                                        | Ribonucleoside-diphosphate reductase (EC 1.17.4.1)                                                              | Escherichia coli (strain 55989 / EAEC)                             |
| 14754  | 1486585 | 1486316 TY-2482_chromosome | B3HLS5                                                                        | Conserved domain protein                                                                                        | Escherichia coli F11                                               |
| 97332  | 1488958 | 1490085 TY-2482_chromosome | B7LAQ2                                                                        | Ribonucleoside diphosphate reductase 1, beta subunit, ferritin-like (EC 1.17.4.1)                               | Escherichia coli (strain 55989 / EAEC)                             |
| 64128  | 1490088 | 1490339 TY-2482_chromosome | B7LAQ3                                                                        | Putative 2Fe-2S cluster-containing protein; putative oxidoreductase subunit                                     | Escherichia coli (strain 55989 / EAEC)                             |
| 115996 | 1491046 | 1490399 TY-2482_chromosome | B7LAQ4                                                                        | Putative uncharacterized protein inaA                                                                           | Escherichia coli (strain 55989 / EAEC)                             |
| 2664   | 1492283 | 1491303 TY-2482_chromosome | POCE57                                                                        | Transposase insH for insertion sequence element ISSR                                                            | Escherichia coli (strain K12)                                      |
| 94400  | 1492425 | 1492664 TY-2482_chromosome | B5YX24                                                                        | Conserved domain protein                                                                                        | Escherichia coli O157:H7 (strain EC4115 / EHEC)                    |
| 115658 | 1493785 | 1492712 TY-2482_chromosome | B7LAQ7                                                                        | Periplasmic glycerophosphodiester phosphodiesterase (EC 3.1.4.46)                                               | Escherichia coli (strain 55989 / EAEC)                             |

|        |         |                            |        |                                                                                                                    |                                                   |
|--------|---------|----------------------------|--------|--------------------------------------------------------------------------------------------------------------------|---------------------------------------------------|
| 95663  | 1495148 | 1493793 TY-2482_chromosome | B7LAQ8 | sn-glycerol-3-phosphate transporter                                                                                | Escherichia coli (strain 55989 / EAEC)            |
| 24500  | 1495199 | 1495393 TY-2482_chromosome | A7ZP61 | Putative uncharacterized protein                                                                                   | Escherichia coli O139:H28 (strain E24377A / ETEC) |
| 110654 | 1495421 | 1497046 TY-2482_chromosome | B7LAQ9 | sn-glycerol-3-phosphate dehydrogenase (Anaerobic) , large subunit, FAD/NAD(P)-binding (EC 1.1.99.5)                | Escherichia coli (strain 55989 / EAEC)            |
| 31156  | 1497039 | 1498295 TY-2482_chromosome | B7LAR0 | Anaerobic glycerol-3-phosphate dehydrogenase subunit B (Anaerobic G-3-P dehydrogenase subunit B) (Anaerobic G3     | Escherichia coli (strain 55989 / EAEC)            |
| 87833  | 1498295 | 1499482 TY-2482_chromosome | B7LAR1 | sn-glycerol-3-phosphate dehydrogenase (Anaerobic) , small subunit (EC 1.1.99.5)                                    | Escherichia coli (strain 55989 / EAEC)            |
| 99213  | 1499679 | 1500578 TY-2482_chromosome | B7LAR2 | Putative uncharacterized protein yfaD                                                                              | Escherichia coli (strain 55989 / EAEC)            |
| 24844  | 1501134 | 1500625 TY-2482_chromosome | A7ZP66 | HpcH/Hpal aldolase/citrate lyase family protein                                                                    | Escherichia coli O139:H28 (strain E24377A / ETEC) |
| 30302  | 1502349 | 1501150 TY-2482_chromosome | B7LAR4 | CinA-like protein                                                                                                  | Escherichia coli (strain 55989 / EAEC)            |
| 95407  | 1502991 | 1502452 TY-2482_chromosome | B7LAR5 | Putative outer membrane porin protein                                                                              | Escherichia coli (strain 55989 / EAEC)            |
| 32732  | 1503270 | 1503692 TY-2482_chromosome | B7LAR6 | Nucleoside triphosphatase nudI (EC 3.6.1.-)                                                                        | Escherichia coli (strain 55989 / EAEC)            |
| 192    | 1504357 | 1503737 TY-2482_chromosome | Q31YK5 | Lipopolysaccharide core heptose(II)-phosphate phosphatase (EC 3.1.3.-)                                             | Shigella boydii serotype 4 (strain Sb227)         |
| 29865  | 1504644 | 1505780 TY-2482_chromosome | B7LAR8 | UDP-4-amino-4-deoxy-L-arabinose--oxoglutarate aminotransferase (EC 2.6.1.87) (UDP-(beta-L-threo-pentapyranosyl-    | Escherichia coli (strain 55989 / EAEC)            |
| 29873  | 1505787 | 1506752 TY-2482_chromosome | B7LAR9 | Undecaprenyl-phosphate 4-deoxy-4-formamido-L-arabinose transferase (EC 2.7.8.30) (Undecaprenyl-phosphate Ara4      | Escherichia coli (strain 55989 / EAEC)            |
| 29859  | 1506755 | 1508734 TY-2482_chromosome | B7LA50 | Bifunctional polymyxin resistance protein ArnA [Includes: UDP-4-amino-4-deoxy-L-arabinose formyltransferase (EC 2. | Escherichia coli (strain 55989 / EAEC)            |
| 29877  | 1508734 | 1509621 TY-2482_chromosome | B7LAS1 | Probable 4-deoxy-4-formamido-L-arabinose-phosphoundecaprenol deformylase ArnD (EC 3.5.1.n3)                        | Escherichia coli (strain 55989 / EAEC)            |
| 29887  | 1509624 | 1511273 TY-2482_chromosome | B7LAS2 | Undecaprenyl phosphate-alpha-4-amino-4-deoxy-L-arabinose arabinosyl transferase (EC 2.4.2.43) (4-amino-4-deoxy-    | Escherichia coli (strain 55989 / EAEC)            |
| 12392  | 1511326 | 1511991 TY-2482_chromosome | D6I9J9 | Polymyxin resistance protein PmrM                                                                                  | Escherichia coli B185                             |
| 114220 | 1512254 | 1511991 TY-2482_chromosome | B7LAS5 | Polymyxin resistance protein B                                                                                     | Escherichia coli (strain 55989 / EAEC)            |
| 73677  | 1513719 | 1512367 TY-2482_chromosome | B7LAS6 | O-succinylbenzoate-CoA ligase (EC 6.2.1.26)                                                                        | Escherichia coli (strain 55989 / EAEC)            |
| 32239  | 1514678 | 1513719 TY-2482_chromosome | B7LAS7 | o-succinylbenzoate synthase (OSB synthase) (OSBS) (EC 4.2.1.113) (4-(2'-carboxyphenyl)-4-oxybutyric acid synthase) | Escherichia coli (strain 55989 / EAEC)            |
| 59188  | 1515535 | 1514681 TY-2482_chromosome | B7LAS8 | Dihydroxynaphthoic acid synthetase (EC 4.1.3.36)                                                                   | Escherichia coli (strain 55989 / EAEC)            |
| 32247  | 1516308 | 1515553 TY-2482_chromosome | B7LAS9 | 2-succinyl-6-hydroxy-2,4-cyclohexadiene-1-carboxylate synthase (SHCHC synthase) (EC 4.2.99.20)                     | Escherichia coli (strain 55989 / EAEC)            |
| 32243  | 1517975 | 1516308 TY-2482_chromosome | B7LAT0 | 2-succinyl-5-enolpyruvyl-6-hydroxy-3-cyclohexene-1-carboxylate synthase (SEPCHC synthase) (EC 2.2.1.9) (Menai      | Escherichia coli (strain 55989 / EAEC)            |
| 58504  | 1519359 | 1518067 TY-2482_chromosome | B7LAT1 | Isochorismate synthase 2 (EC 5.4.4.2)                                                                              | Escherichia coli (strain 55989 / EAEC)            |
| 100764 | 1519743 | 1519441 TY-2482_chromosome | B7LAT2 | Putative uncharacterized protein elaB                                                                              | Escherichia coli (strain 55989 / EAEC)            |
| 73757  | 1520259 | 1519801 TY-2482_chromosome | B7LAT3 | Putative acyltransferase with acyl-CoA N-acyltransferase domain                                                    | Escherichia coli (strain 55989 / EAEC)            |
| 33259  | 1520324 | 1521238 TY-2482_chromosome | B7LAT4 | Ribonuclease BN (RNase BN) (EC 3.1.-.-) (Ribonuclease Z homolog) (RNase Z homolog                                  | Escherichia coli (strain 55989 / EAEC)            |
| 89902  | 1521429 | 1522647 TY-2482_chromosome | B7LAT5 | Putative enzyme                                                                                                    | Escherichia coli (strain 55989 / EAEC)            |
| 9511   | 1523092 | 1523319 TY-2482_chromosome | D7ZXR9 | Putative uncharacterized protein                                                                                   | Escherichia coli IMS 187-1                        |
| 75322  | 1523295 | 1523642 TY-2482_chromosome | B7LAT6 | Putative uncharacterized protein                                                                                   | Escherichia coli (strain 55989 / EAEC)            |
| 93292  | 1523771 | 1524271 TY-2482_chromosome | B7LAT7 | Putative uncharacterized protein yfbM                                                                              | Escherichia coli (strain 55989 / EAEC)            |
| 32771  | 1525798 | 1524344 TY-2482_chromosome | B7LAT8 | NADH-quinone oxidoreductase subunit N (EC 1.6.99.5) (NADH dehydrogenase I subunit N) (NDH-1 subunit N              | Escherichia coli (strain 55989 / EAEC)            |
| 77459  | 1527334 | 1525808 TY-2482_chromosome | B7LAT9 | NADH:ubiquinone oxidoreductase, membrane subunit M                                                                 | Escherichia coli (strain 55989 / EAEC)            |
| 95633  | 1529339 | 1527501 TY-2482_chromosome | B7LAU0 | NADH:ubiquinone oxidoreductase, membrane subunit L                                                                 | Escherichia coli (strain 55989 / EAEC)            |
| 32767  | 1529638 | 1529339 TY-2482_chromosome | B7LAU1 | NADH-quinone oxidoreductase subunit K (EC 1.6.99.5) (NADH dehydrogenase I subunit K) (NDH-1 subunit K              | Escherichia coli (strain 55989 / EAEC)            |
| 116131 | 1530189 | 1529638 TY-2482_chromosome | B7LAU2 | NADH:ubiquinone oxidoreductase, membrane subunit J                                                                 | Escherichia coli (strain 55989 / EAEC)            |
| 97124  | 1530743 | 1530204 TY-2482_chromosome | B7LAU3 | NADH-quinone oxidoreductase subunit I (EC 1.6.99.5) (NADH dehydrogenase I subunit I) (NDH-1 subunit I'             | Escherichia coli (strain 55989 / EAEC)            |
| 32761  | 1531735 | 1530761 TY-2482_chromosome | B7LAU4 | NADH-quinone oxidoreductase subunit H (EC 1.6.99.5) (NADH dehydrogenase I subunit H) (NDH-1 subunit H              | Escherichia coli (strain 55989 / EAEC)            |
| 88439  | 1534464 | 1531735 TY-2482_chromosome | B7LAU5 | NADH-quinone oxidoreductase (EC 1.6.99.5)                                                                          | Escherichia coli (strain 55989 / EAEC)            |
| 94274  | 1535848 | 1534514 TY-2482_chromosome | B7LAU6 | NADH:ubiquinone oxidoreductase, chain F (EC 1.6.5.3)                                                               | Escherichia coli (strain 55989 / EAEC)            |
| 73758  | 1536345 | 1535848 TY-2482_chromosome | B7LAU7 | NADH:ubiquinone oxidoreductase, chain E (EC 1.6.5.3)                                                               | Escherichia coli (strain 55989 / EAEC)            |
| 32746  | 1538150 | 1536351 TY-2482_chromosome | B7LAU8 | NADH-quinone oxidoreductase subunit C/D (EC 1.6.99.5) (NADH dehydrogenase I subunit C/D) (NDH-1 subunit C/D        | Escherichia coli (strain 55989 / EAEC)            |
| 32742  | 1538906 | 1538247 TY-2482_chromosome | B7LBP8 | NADH-quinone oxidoreductase subunit B (EC 1.6.99.5) (NADH dehydrogenase I subunit B) (NDH-1 subunit B              | Escherichia coli (strain 55989 / EAEC)            |
| 86873  | 1539365 | 1538925 TY-2482_chromosome | B7LBE2 | NADH-quinone oxidoreductase subunit (EC 1.6.99.5)                                                                  | Escherichia coli (strain 55989 / EAEC)            |
| 28545  | 1539820 | 1539515 TY-2482_chromosome | A1ADD7 | Putative uncharacterized protein                                                                                   | Escherichia coli O1:K1 / APEC                     |
| 98082  | 1540934 | 1539999 TY-2482_chromosome | B7LBE3 | DNA-binding transcriptional repressor of flagellar, motility and chemotaxis genes                                  | Escherichia coli (strain 55989 / EAEC)            |
| 19111  | 1541174 | 1541425 TY-2482_chromosome | D6ICI7 | Predicted protein                                                                                                  | Escherichia coli B354                             |
| 88481  | 1541854 | 1543068 TY-2482_chromosome | B7LBE4 | Putative aminotransferase                                                                                          | Escherichia coli (strain 55989 / EAEC)            |
| 34897  | 1543155 | 1543751 TY-2482_chromosome | B7LBE5 | UPF0207 protein yfbR                                                                                               | Escherichia coli (strain 55989 / EAEC)            |
| 95366  | 1545645 | 1543816 TY-2482_chromosome | B7LBE6 | Putative transporter                                                                                               | Escherichia coli (strain 55989 / EAEC)            |
| 91627  | 1546382 | 1545735 TY-2482_chromosome | B5YXT3 | Sugar-phosphatase, YfbT (EC 3.1.3.23)                                                                              | Escherichia coli O157:H7 (strain EC4115 / EHEC)   |
| 34900  | 1546935 | 1546396 TY-2482_chromosome | B7LBE8 | UPF0304 protein yfbU                                                                                               | Escherichia coli (strain 55989 / EAEC)            |
| 34903  | 1547473 | 1547021 TY-2482_chromosome | B7LBE9 | UPF0208 membrane protein yfbV                                                                                      | Escherichia coli (strain 55989 / EAEC)            |
| 59194  | 1547811 | 1549010 TY-2482_chromosome | B7LBF0 | Acetate kinase A and propionate kinase 2 (EC 2.7.2.-) (EC 2.7.2.1)                                                 | Escherichia coli (strain 55989 / EAEC)            |
| 62841  | 1549088 | 1551229 TY-2482_chromosome | B7LBF1 | Phosphate acetyltransferase (EC 2.3.1.8) (Phosphotransacetylase)                                                   | Escherichia coli (strain 55989 / EAEC)            |
| 113183 | 1551422 | 1552939 TY-2482_chromosome | B7LBF2 | Putative uncharacterized protein yfcC                                                                              | Escherichia coli (strain 55989 / EAEC)            |
| 104335 | 1553517 | 1552978 TY-2482_chromosome | B7LBF3 | Putative NUDIX hydrolase                                                                                           | Escherichia coli (strain 55989 / EAEC)            |
| 58642  | 1554129 | 1553578 TY-2482_chromosome | B7LBF4 | Putative phosphatase                                                                                               | Escherichia coli (strain 55989 / EAEC)            |
| 82642  | 1554826 | 1554185 TY-2482_chromosome | B7LBF5 | Putative enzyme                                                                                                    | Escherichia coli (strain 55989 / EAEC)            |
| 95368  | 1554962 | 1555606 TY-2482_chromosome | B7LBF6 | Putative S-transferase                                                                                             | Escherichia coli (strain 55989 / EAEC)            |
| 102676 | 1555666 | 1556025 TY-2482_chromosome | B7LBF7 | D-erythro-7,8-dihydroneopterin triphosphate 2'-epimerase and dihydroneopterin aldolase                             | Escherichia coli (strain 55989 / EAEC)            |
| 57964  | 1556049 | 1556939 TY-2482_chromosome | B7LBF8 | Putative uncharacterized protein yfcH                                                                              | Escherichia coli (strain 55989 / EAEC)            |
| 108273 | 1557892 | 1556993 TY-2482_chromosome | B7LBF9 | Putative transposase                                                                                               | Escherichia coli (strain 55989 / EAEC)            |
| 102677 | 1558862 | 1558092 TY-2482_chromosome | B7LBG0 | Histidine/lysine/arginine/ornithine transporter subunit ; ATP-binding component of ABC superfamily                 | Escherichia coli (strain 55989 / EAEC)            |



|        |         |                            |               |                                                                                                                        |                                                                    |
|--------|---------|----------------------------|---------------|------------------------------------------------------------------------------------------------------------------------|--------------------------------------------------------------------|
| 70088  | 1559586 | 1558873 TY-2482_chromosome | B7LBG1        | Histidine/lysine/arginine/ornithine transporter subunit ; membrane component of ABC superfamily                        | Escherichia coli (strain 55989 / EAEC)                             |
| 95370  | 1560269 | 1559586 TY-2482_chromosome | B7LBG2        | Histidine/lysine/arginine/ornithine transporter subunit ; membrane component of ABC superfamily                        | Escherichia coli (strain 55989 / EAEC)                             |
| 106338 | 1561141 | 1560362 TY-2482_chromosome | B7LBG3        | Histidine/lysine/arginine/ornithine transporter subunit ; periplasmic-binding component of ABC superfamily             | Escherichia coli (strain 55989 / EAEC)                             |
| 78781  | 1562144 | 1561365 TY-2482_chromosome | B7LBG4        | Lysine/arginine/ornithine transporter subunit ; periplasmic-binding component of ABC superfamily                       | Escherichia coli (strain 55989 / EAEC)                             |
| 110515 | 1562979 | 1562413 TY-2482_chromosome | B7LBG5        | 3-octaprenyl-4-hydroxybenzoate carboxy-lyase (EC 4.1.1.-)                                                              | Escherichia coli (strain 55989 / EAEC)                             |
| 70089  | 1564591 | 1563077 TY-2482_chromosome | B7LBG6        | Amidophosphoribosyltransferase (ATase) (EC 2.4.2.14) (Glutamine phosphoribosylpyrophosphate amidotransferase           | Escherichia coli (strain 55989 / EAEC)                             |
| 112245 | 1565116 | 1564631 TY-2482_chromosome | B7LBG7        | Membrane protein required for colicin V production                                                                     | Escherichia coli (strain 55989 / EAEC)                             |
| 95372  | 1566037 | 1565378 TY-2482_chromosome | B7LBG8        | Putative uncharacterized protein dedD                                                                                  | Escherichia coli (strain 55989 / EAEC)                             |
| 114135 | 1567295 | 1566030 TY-2482_chromosome | B7LBG9        | Bifunctional folylpolyglutamate synthase and dihydrofolate synthase (EC 6.3.2.12) (EC 6.3.2.17)                        | Escherichia coli (strain 55989 / EAEC)                             |
| 76390  | 1568279 | 1567368 TY-2482_chromosome | B7LBH0        | Acetyl-CoA carboxylase, beta (Carboxyltransferase) subunit (EC 6.4.1.2)                                                | Escherichia coli (strain 55989 / EAEC)                             |
| 75221  | 1569094 | 1568438 TY-2482_chromosome | B7LBH1        | Putative uncharacterized protein dedA                                                                                  | Escherichia coli (strain 55989 / EAEC)                             |
| 34359  | 1569989 | 1569180 TY-2482_chromosome | B7LBH2        | tRNA pseudouridine synthase A (EC 5.4.99.12) (tRNA pseudouridylate synthase)                                           | Escherichia coli (strain 55989 / EAEC)                             |
| 79805  | 1571002 | 1569992 TY-2482_chromosome | B7LBH3        | Putative semialdehyde dehydrogenase                                                                                    | Escherichia coli (strain 55989 / EAEC)                             |
| 32904  | 1572204 | 1571071 TY-2482_chromosome | B7LBH4        | Erythronate-4-phosphate dehydrogenase (EC 1.1.1.290)                                                                   | Escherichia coli (strain 55989 / EAEC)                             |
| 59196  | 1572303 | 1573295 TY-2482_chromosome | B7LBH5        | Flagella control of anti-sigma factor FlgM secretion into the periplasm                                                | Escherichia coli (strain 55989 / EAEC)                             |
| 87707  | 1574473 | 1573298 TY-2482_chromosome | B7LBH6        | UPF0226 membrane protein EC55989_2566                                                                                  | Escherichia coli (strain 55989 / EAEC)                             |
| 108036 | 1575977 | 1574760 TY-2482_chromosome | B7LBH7        | 3-oxoacyl-[acyl-carrier-protein] synthase I (EC 2.3.1.41)                                                              | Escherichia coli (strain 55989 / EAEC)                             |
| 81106  | 1576136 | 1578139 TY-2482_chromosome | B7LBH8        | tRNA 5-methylaminomethyl-2-thiouridine biosynthesis bifunctional protein mnmC (tRNA mnm(5)S(2)U biosynthesis b         | Escherichia coli (strain 55989 / EAEC)                             |
| 86829  | 1578541 | 1578266 TY-2482_chromosome | B7LBH9        | Putative uncharacterized protein yfcL                                                                                  | Escherichia coli (strain 55989 / EAEC)                             |
| 102692 | 1579123 | 1578578 TY-2482_chromosome | B7LB10        | Putative uncharacterized protein yfcM                                                                                  | Escherichia coli (strain 55989 / EAEC)                             |
| 77513  | 1579932 | 1579126 TY-2482_chromosome | B7LB11        | Putative uncharacterized protein yfcA                                                                                  | Escherichia coli (strain 55989 / EAEC)                             |
| 32251  | 1580756 | 1579935 TY-2482_chromosome | B7LB12        | Penicillin-insensitive murein endopeptidase (EC 3.4.24.-) (D-alanyl-D-alanine-endopeptidase) (DD-endopeptidase         | Escherichia coli (strain 55989 / EAEC)                             |
| 29900  | 1581845 | 1580763 TY-2482_chromosome | B7LB13        | Chorismate synthase (EC 4.2.3.5) (5-enolpyruvylshikimate-3-phosphate phospholyase)                                     | Escherichia coli (strain 55989 / EAEC)                             |
| 69914  | 1582812 | 1581883 TY-2482_chromosome | B7LB14        | N5-glutamine methyltransferase (EC 2.1.1.-)                                                                            | Escherichia coli (strain 55989 / EAEC)                             |
| 34910  | 1582978 | 1583526 TY-2482_chromosome | B7LB15        | UPF0115 protein yfcN                                                                                                   | Escherichia coli (strain 55989 / EAEC)                             |
| 115753 | 1584703 | 1583726 TY-2482_chromosome | B7LF78        | Transposase, IS110 family                                                                                              | Escherichia coli (strain 55989 / EAEC)                             |
| 70090  | 1585802 | 1584933 TY-2482_chromosome | B7LB17        | Putative uncharacterized protein                                                                                       | Escherichia coli (strain 55989 / EAEC)                             |
| 71431  | 1586313 | 1585792 TY-2482_chromosome | B7LB18        | Putative fimbrial protein (Adhesin)                                                                                    | Escherichia coli (strain 55989 / EAEC)                             |
| 86961  | 1586780 | 1586313 TY-2482_chromosome | B7LB19        | Putative fimbrial protein                                                                                              | Escherichia coli (strain 55989 / EAEC)                             |
| 59197  | 1587391 | 1586780 TY-2482_chromosome | B7LB10        | Putative minor fimbrial subunit                                                                                        | Escherichia coli (strain 55989 / EAEC)                             |
| 81107  | 1588052 | 1587303 TY-2482_chromosome | B7LB11        | Putative periplasmic pilus exported chaperone                                                                          | Escherichia coli (strain 55989 / EAEC)                             |
| 101575 | 1590714 | 1588075 TY-2482_chromosome | B7LB12        | Putative outer membrane usher protein yfcU                                                                             | Escherichia coli (strain 55989 / EAEC)                             |
| 73815  | 1591359 | 1590799 TY-2482_chromosome | B7LB13        | Putative fimbrial-like adhesin exported protein                                                                        | Escherichia coli (strain 55989 / EAEC)                             |
| 87154  | 1592519 | 1592037 TY-2482_chromosome | B7LB14        | Phosphohistidine phosphatase (EC 3.1.3.-)                                                                              | Escherichia coli (strain 55989 / EAEC)                             |
| 30886  | 1594866 | 1592725 TY-2482_chromosome | B7LB15        | Fatty acid oxidation complex subunit alpha [Includes: Enoyl-CoA hydratase/3-hydroxybutyryl-CoA epimerase (EC 4.2.1     | Escherichia coli (strain 55989 / EAEC)                             |
| 30870  | 1596176 | 1594869 TY-2482_chromosome | B7LB16        | 3-ketoacyl-CoA thiolase (EC 2.3.1.16) (ACSS) (Acetyl-CoA acyltransferase) (Acyl-CoA ligase) (Beta-ketothiolase) (Fatty | Escherichia coli (strain 55989 / EAEC)                             |
| 62135  | 1596640 | 1596359 TY-2482_chromosome | B7LB17        | Putative uncharacterized protein yfcZ                                                                                  | Escherichia coli (strain 55989 / EAEC)                             |
| 10548  | 1596976 | 1596728 TY-2482_chromosome | D6ICN8        | Predicted protein                                                                                                      | Escherichia coli B354                                              |
| 70091  | 1597006 | 1598349 TY-2482_chromosome | B7LB18        | Long-chain fatty acid outer membrane transporter                                                                       | Escherichia coli (strain 55989 / EAEC)                             |
| 80958  | 1598718 | 1599773 TY-2482_chromosome | B7LB19        | Putative uncharacterized protein yfdF                                                                                  | Escherichia coli (strain 55989 / EAEC)                             |
| 59198  | 1600713 | 1599961 TY-2482_chromosome | B7LBK0        | Putative lipoprotein                                                                                                   | Escherichia coli (strain 55989 / EAEC)                             |
| 98177  | 1601007 | 1601936 TY-2482_chromosome | B7LBK2        | Putative uncharacterized protein yfdC                                                                                  | Escherichia coli (strain 55989 / EAEC)                             |
| r478   | 1602015 | 1602089 TY-2482_chromosome | ref NC_010473 | :2556096-2556170 Arg tRNA  [gene=argW] [locus_tag=ECDH10B_2511                                                         |                                                                    |
| 108643 | 1602251 | 1603405 TY-2482_chromosome | B7LBK3        | Putative prophage CPS-53 integrase; CPS-53 (KpLE1) prophage                                                            | Escherichia coli (strain 55989 / EAEC)                             |
| 27670  | 1603625 | 1605544 TY-2482_chromosome | B7LBK4        | Putative uncharacterized protein                                                                                       | Escherichia coli (strain 55989 / EAEC)                             |
| 29117  | 1607597 | 1605621 TY-2482_chromosome | B7LBK5        | Putative uncharacterized protein                                                                                       | Escherichia coli (strain 55989 / EAEC)                             |
| 104786 | 1608576 | 1607701 TY-2482_chromosome | B5YWP4        | Antirepressor protein                                                                                                  | Escherichia coli O157:H7 (strain EC4115 / EHEC)                    |
| 8215   | 1609055 | 1609303 TY-2482_chromosome | A5VW59        | Phage regulatory protein                                                                                               | Enterobacteria phage CUS-3                                         |
| 9449   | 1609303 | 1609614 TY-2482_chromosome | D7X4T9        | Putative uncharacterized protein                                                                                       | Escherichia coli IMS 198-1                                         |
| 79643  | 1609607 | 1610125 TY-2482_chromosome | C8TUZ6        | Predicted lipoprotein                                                                                                  | Escherichia coli O26:H11 (strain 11368 / EHEC)                     |
| 25402  | 1611990 | 1610146 TY-2482_chromosome | B7LTY2        | DNA transfer protein from phage                                                                                        | Escherichia fergusonii (strain ATCC 35469 / DSM 13698 / CDC 0568-7 |
| 10419  | 1613453 | 1611990 TY-2482_chromosome | E7SY70        | Phage DNA transfer protein                                                                                             | Shigella boydii ATCC 9905                                          |
| 111659 | 1614155 | 1613466 TY-2482_chromosome | C8TUZ9        | Putative DNA transfer protein                                                                                          | Escherichia coli O26:H11 (strain 11368 / EHEC)                     |
| 115409 | 1614616 | 1614161 TY-2482_chromosome | B7LBL6        | Head assembly protein                                                                                                  | Escherichia coli (strain 55989 / EAEC)                             |
| 107146 | 1615461 | 1614616 TY-2482_chromosome | C8TV01        | Putative head DNA stabilization protein                                                                                | Escherichia coli O26:H11 (strain 11368 / EHEC)                     |
| 86942  | 1616879 | 1615464 TY-2482_chromosome | B7LBL8        | Packaged DNA stabilization protein from phage                                                                          | Escherichia coli (strain 55989 / EAEC)                             |
| 108495 | 1617370 | 1616891 TY-2482_chromosome | B7LBL9        | Putative packaged DNA stabilization protein p27                                                                        | Escherichia coli (strain 55989 / EAEC)                             |
| 29522  | 1618844 | 1617576 TY-2482_chromosome | B7LBM1        | Major head protein (P24) (Major coat protein)                                                                          | Escherichia coli (strain 55989 / EAEC)                             |
| 102693 | 1619740 | 1618859 TY-2482_chromosome | B7LBM2        | Putative scaffold protein                                                                                              | Escherichia coli (strain 55989 / EAEC)                             |
| 106342 | 1621952 | 1619757 TY-2482_chromosome | B7LBM3        | Portal protein p19                                                                                                     | Escherichia coli (strain 55989 / EAEC)                             |
| 59199  | 1623295 | 1621886 TY-2482_chromosome | B7LBM4        | Terminase large subunit                                                                                                | Escherichia coli (strain 55989 / EAEC)                             |
| 8189   | 1623732 | 1623295 TY-2482_chromosome | A5VW76        | Phage terminase small subunit                                                                                          | Enterobacteria phage CUS-3                                         |
| 67964  | 1623977 | 1623738 TY-2482_chromosome | B7LBM6        | Putative uncharacterized protein                                                                                       | Escherichia coli (strain 55989 / EAEC)                             |
| 14372  | 1624794 | 1624100 TY-2482_chromosome | E1U309        | Transposase InsAB'                                                                                                     | Escherichia coli                                                   |

|        |         |                            |                                                                               |                                                                                                                       |                                                                       |
|--------|---------|----------------------------|-------------------------------------------------------------------------------|-----------------------------------------------------------------------------------------------------------------------|-----------------------------------------------------------------------|
| 28811  | 1625519 | 1626151 TY-2482_chromosome | B7LBQ5                                                                        | DNA single-strand annealing protein; essential recombination function protein Er                                      | Escherichia coli (strain 55989 / EAEC)                                |
| 80882  | 1626064 | 1626534 TY-2482_chromosome | B7LBQ6                                                                        | Putative uncharacterized protein                                                                                      | Escherichia coli (strain 55989 / EAEC)                                |
| 73656  | 1626561 | 1626854 TY-2482_chromosome | B7LBQ7                                                                        | Anti-RecBCD protein 2                                                                                                 | Escherichia coli (strain 55989 / EAEC)                                |
| 8199   | 1626868 | 1627155 TY-2482_chromosome | Q716F1                                                                        | Gene 24 protein                                                                                                       | Enterobacteria phage Sf6 (Shigella flexneri bacteriophage VI) (Bacter |
| 24263  | 1627319 | 1627987 TY-2482_chromosome | B7LBQ9                                                                        | Putative EA22-like protein; similarities with EA22 from lambda (Modular protein involved in blocking host replication | Escherichia coli (strain 55989 / EAEC)                                |
| 25073  | 1628163 | 1628348 TY-2482_chromosome | B7LBR0                                                                        | Putative uncharacterized protein                                                                                      | Escherichia coli (strain 55989 / EAEC)                                |
| 59056  | 1628353 | 1628559 TY-2482_chromosome | B7LBR1                                                                        | Putative uncharacterized protein                                                                                      | Escherichia coli (strain 55989 / EAEC)                                |
| 27445  | 1628559 | 1629185 TY-2482_chromosome | B7LBR2                                                                        | Putative uncharacterized protein                                                                                      | Escherichia coli (strain 55989 / EAEC)                                |
| 16183  | 1629244 | 1629480 TY-2482_chromosome | E9U5T6                                                                        | Conserved domain protein                                                                                              | Escherichia coli MS 57-2                                              |
| 79480  | 1629596 | 1629793 TY-2482_chromosome | B7LBR3                                                                        | Response regulator inhibitor for tor operon                                                                           | Escherichia coli (strain 55989 / EAEC)                                |
| 77364  | 1631573 | 1630329 TY-2482_chromosome | B7LBR4                                                                        | Sucrose transport protein (Sucrose permease) (EC 2.7.1.69)                                                            | Escherichia coli (strain 55989 / EAEC)                                |
| 5005   | 1632559 | 1631648 TY-2482_chromosome | P40713                                                                        | Fructokinase (EC 2.7.1.4)                                                                                             | Escherichia coli                                                      |
| 66211  | 1632766 | 1634205 TY-2482_chromosome | B7LBR6                                                                        | Sucrose-6-phosphate hydrolase (Beta-fructofuranosidase) (Sucrase) (Invertase) (EC 3.2.1.26)                           | Escherichia coli (strain 55989 / EAEC)                                |
| 58046  | 1635397 | 1634219 TY-2482_chromosome | B7LBR7                                                                        | Sucrose operon repressor (Csc operon regulatory protein)                                                              | Escherichia coli (strain 55989 / EAEC)                                |
| 9988   | 1635442 | 1635657 TY-2482_chromosome | E6A6E9                                                                        | GntP family permease (Fragment)                                                                                       | Escherichia coli MS 153-1                                             |
| 33903  | 1635678 | 1637003 TY-2482_chromosome | B7LBR9                                                                        | D-serine dehydratase (EC 4.3.1.18) (D-serine deaminase) (DSD)                                                         | Escherichia coli (strain 55989 / EAEC)                                |
| 88252  | 1638652 | 1637117 TY-2482_chromosome | B7LBS0                                                                        | Putative multidrug efflux system                                                                                      | Escherichia coli (strain 55989 / EAEC)                                |
| 108499 | 1639815 | 1638655 TY-2482_chromosome | B7LBS1                                                                        | EmrKY-ToIC multidrug resistance efflux pump, membrane fusion protein component                                        | Escherichia coli (strain 55989 / EAEC)                                |
| 69953  | 1640231 | 1640842 TY-2482_chromosome | B7LBS2                                                                        | DNA-binding response regulator in two-component regulatory system with Evg5                                           | Escherichia coli (strain 55989 / EAEC)                                |
| 112172 | 1640850 | 1644440 TY-2482_chromosome | B7LBS3                                                                        | Hybrid sensory histidine kinase in two-component regulatory system with EvgA                                          | Escherichia coli (strain 55989 / EAEC)                                |
| 79015  | 1645644 | 1644502 TY-2482_chromosome | B7LBS4                                                                        | Putative acyl-CoA-transferase, NAD(P)-binding                                                                         | Escherichia coli (strain 55989 / EAEC)                                |
| 72044  | 1646662 | 1645721 TY-2482_chromosome | B7LBS5                                                                        | Putative transporter                                                                                                  | Escherichia coli (strain 55989 / EAEC)                                |
| 79857  | 1648426 | 1646735 TY-2482_chromosome | B7LBS6                                                                        | Putative oxalyl-CoA decarboxylase                                                                                     | Escherichia coli (strain 55989 / EAEC)                                |
| 30915  | 1649730 | 1648483 TY-2482_chromosome | B7LBS7                                                                        | Formyl-coenzyme A transferase (Formyl-CoA transferase) (EC 2.8.3.16)                                                  | Escherichia coli (strain 55989 / EAEC)                                |
| 94053  | 1650875 | 1650246 TY-2482_chromosome | B7LCC6                                                                        | Putative uncharacterized protein yfdX                                                                                 | Escherichia coli (strain 55989 / EAEC)                                |
| 88373  | 1651171 | 1651443 TY-2482_chromosome | B7LCC7                                                                        | Putative lipoprotein                                                                                                  | Escherichia coli (strain 55989 / EAEC)                                |
| 111473 | 1651765 | 1651526 TY-2482_chromosome | B7LCC8                                                                        | Putative uncharacterized protein yfdY                                                                                 | Escherichia coli (strain 55989 / EAEC)                                |
| 87786  | 1652118 | 1653035 TY-2482_chromosome | B7LCD0                                                                        | Palmitoleoyl-acyl carrier protein (ACP)-dependent acyltransferase                                                     | Escherichia coli (strain 55989 / EAEC)                                |
| 59012  | 1654768 | 1653533 TY-2482_chromosome | B7LCD1                                                                        | Putative aminotransferase, PLP-dependent                                                                              | Escherichia coli (strain 55989 / EAEC)                                |
| 13971  | 1654888 | 1655193 TY-2482_chromosome | E1J8V4                                                                        | Conserved domain protein                                                                                              | Escherichia coli MS 124-1                                             |
| 62622  | 1655145 | 1656839 TY-2482_chromosome | B7LCD2                                                                        | Putative sensory kinase in two-component system with YpdB                                                             | Escherichia coli (strain 55989 / EAEC)                                |
| 102728 | 1656857 | 1657588 TY-2482_chromosome | B7LCD3                                                                        | Putative response regulator in two-component system with YpdA                                                         | Escherichia coli (strain 55989 / EAEC)                                |
| 101623 | 1657604 | 1658458 TY-2482_chromosome | B7LCD4                                                                        | Putative DNA-binding protein                                                                                          | Escherichia coli (strain 55989 / EAEC)                                |
| 105752 | 1660959 | 1658467 TY-2482_chromosome | B7LCD5                                                                        | Putative fused PTS enzymes (Multiphosphoryl transfer protein): Hpr component ; enzyme I component ; enzyme IIA c      | Escherichia coli (strain 55989 / EAEC)                                |
| 99026  | 1662021 | 1660987 TY-2482_chromosome | B7LCD6                                                                        | Broad substrate metalloaminopeptidase                                                                                 | Escherichia coli (strain 55989 / EAEC)                                |
| 73596  | 1663106 | 1662024 TY-2482_chromosome | B7LCD7                                                                        | Xaa-Pro and Met-Xaa peptidase                                                                                         | Escherichia coli (strain 55989 / EAEC)                                |
| 84431  | 1664368 | 1663124 TY-2482_chromosome | B7LCD8                                                                        | Putative enzyme IIC component of PTS                                                                                  | Escherichia coli (strain 55989 / EAEC)                                |
| 64407  | 1664716 | 1664393 TY-2482_chromosome | B7LCD9                                                                        | Putative enzyme IIB component of PTS                                                                                  | Escherichia coli (strain 55989 / EAEC)                                |
| 31128  | 1665900 | 1664938 TY-2482_chromosome | B7LCE0                                                                        | Glucokinase (EC 2.7.1.2) (Glucose kinase)                                                                             | Escherichia coli (strain 55989 / EAEC)                                |
| 34914  | 1666104 | 1667357 TY-2482_chromosome | B7LCE1                                                                        | Putative ion-transport protein yfeO                                                                                   | Escherichia coli (strain 55989 / EAEC)                                |
| 115747 | 1667475 | 1667798 TY-2482_chromosome | B7LCE2                                                                        | Putative uncharacterized protein ypeC                                                                                 | Escherichia coli (strain 55989 / EAEC)                                |
| 32436  | 1669180 | 1667945 TY-2482_chromosome | B7LCE3                                                                        | Manganese transport protein mntH                                                                                      | Escherichia coli (strain 55989 / EAEC)                                |
| 98077  | 1669516 | 1670715 TY-2482_chromosome | B7LCE4                                                                        | Nucleoside (Except guanosine) transporter                                                                             | Escherichia coli (strain 55989 / EAEC)                                |
| 109631 | 1672957 | 1670771 TY-2482_chromosome | B7LCE5                                                                        | Putative diguanylate cyclase                                                                                          | Escherichia coli (strain 55989 / EAEC)                                |
| r386   | 1673240 | 1673165 TY-2482_chromosome | ref NC_010473 :2607943-2608018 Ala tRNA   [gene=alaW] [locus_tag=ECDH10B_2561 |                                                                                                                       |                                                                       |
| r385   | 1673355 | 1673280 TY-2482_chromosome | ref NC_010473 :2607943-2608018 Ala tRNA   [gene=alaW] [locus_tag=ECDH10B_2561 |                                                                                                                       |                                                                       |
| 75125  | 1673576 | 1673932 TY-2482_chromosome | C8UDX7                                                                        | Predicted DNA-binding transcriptional regulator                                                                       | Escherichia coli O111:H- (strain 11128 / EHEC                         |
| 100849 | 1673937 | 1674326 TY-2482_chromosome | B7LCE7                                                                        | Putative nucleic acid-binding transcriptional regulator                                                               | Escherichia coli (strain 55989 / EAEC)                                |
| 81118  | 1675796 | 1674384 TY-2482_chromosome | B7LCE8                                                                        | Glutamyl-tRNA synthetase (EC 6.1.1.17)                                                                                | Escherichia coli (strain 55989 / EAEC)                                |
| r364   | 1676055 | 1676130 TY-2482_chromosome | ref NC_010473 :2610960-2611035 Val tRNA   [gene=valY] [locus_tag=ECDH10B_2567 |                                                                                                                       |                                                                       |
| r365   | 1676175 | 1676250 TY-2482_chromosome | ref NC_010473 :2610960-2611035 Val tRNA   [gene=valY] [locus_tag=ECDH10B_2567 |                                                                                                                       |                                                                       |
| r370   | 1676295 | 1676371 TY-2482_chromosome | ref NC_010473 :2610960-2611035 Val tRNA   [gene=valY] [locus_tag=ECDH10B_2567 |                                                                                                                       |                                                                       |
| r366   | 1676416 | 1676491 TY-2482_chromosome | ref NC_010473 :2610960-2611035 Val tRNA   [gene=valY] [locus_tag=ECDH10B_2567 |                                                                                                                       |                                                                       |
| r367   | 1676538 | 1676613 TY-2482_chromosome | ref NC_010473 :2610960-2611035 Val tRNA   [gene=valY] [locus_tag=ECDH10B_2567 |                                                                                                                       |                                                                       |
| r363   | 1676618 | 1676691 TY-2482_chromosome | ref NC_010473 :2611040-2611115 Lys tRNA   [gene=lysV] [locus_tag=ECDH10B_2568 |                                                                                                                       |                                                                       |
| 95417  | 1677684 | 1676803 TY-2482_chromosome | B7LCE9                                                                        | DNA-binding transcriptional activator                                                                                 | Escherichia coli (strain 55989 / EAEC)                                |
| 94865  | 1679192 | 1677939 TY-2482_chromosome | B7LCF0                                                                        | Xanthosine transporter                                                                                                | Escherichia coli (strain 55989 / EAEC)                                |
| 59013  | 1680085 | 1679255 TY-2482_chromosome | B7LCF1                                                                        | Purine nucleoside phosphorylase II (EC 2.4.2.1)                                                                       | Escherichia coli (strain 55989 / EAEC)                                |
| 104402 | 1680334 | 1681095 TY-2482_chromosome | B7LCF2                                                                        | Putative outer membrane protein                                                                                       | Escherichia coli (strain 55989 / EAEC)                                |
| 94309  | 1682063 | 1681140 TY-2482_chromosome | B7LCF3                                                                        | Putative DNA-binding transcriptional regulator                                                                        | Escherichia coli (strain 55989 / EAEC)                                |
| 68637  | 1682153 | 1683148 TY-2482_chromosome | B7LCF4                                                                        | Putative sodium/bile acid symporter family (MazG-like)                                                                | Escherichia coli (strain 55989 / EAEC)                                |
| 70101  | 1683366 | 1683151 TY-2482_chromosome | B7LCF5                                                                        | Putative uncharacterized protein ypeB                                                                                 | Escherichia coli (strain 55989 / EAEC)                                |
| 30657  | 1685383 | 1683371 TY-2482_chromosome | B7LCF6                                                                        | DNA ligase (EC 6.5.1.2) (Polydeoxyribonucleotide synthase [NAD+])                                                     | Escherichia coli (strain 55989 / EAEC)                                |
| 35082  | 1686440 | 1685457 TY-2482_chromosome | B7LCF7                                                                        | Cell division protein ZipA homolog                                                                                    | Escherichia coli (strain 55989 / EAEC)                                |

|        |         |                            |        |                                                                                                                   |                                                |
|--------|---------|----------------------------|--------|-------------------------------------------------------------------------------------------------------------------|------------------------------------------------|
| 30527  | 1686670 | 1687428 TY-2482_chromosome | B7LCF8 | Protein CysZ                                                                                                      | Escherichia coli (strain 55989 / EAEC)         |
| 72856  | 1687616 | 1688584 TY-2482_chromosome | B7LCF9 | Cysteine synthase (EC 2.5.1.47)                                                                                   | Escherichia coli (strain 55989 / EAEC)         |
| 4309   | 1688971 | 1689225 TY-2482_chromosome | Q83QP3 | Multiphosphoryl transfer protein (MTP) [Includes: Phosphoenolpyruvate-protein phosphotransferase (EC 2.7.3.9) (Ph | Shigella flexneri                              |
| 75433  | 1689273 | 1690997 TY-2482_chromosome | B7LCG1 | PEP-protein phosphotransferase of PTS system (Enzyme I) (EC 2.7.3.9)                                              | Escherichia coli (strain 55989 / EAEC)         |
| 112091 | 1691041 | 1691547 TY-2482_chromosome | B7LCG2 | Glucose-specific enzyme IIA component of PTS (EC 2.7.1.69)                                                        | Escherichia coli (strain 55989 / EAEC)         |
| 32914  | 1692443 | 1691595 TY-2482_chromosome | B7LCG3 | Pyridoxine kinase (EC 2.7.1.35) (PN/PL/PM kinase) (Pyridoxal kinase) (Vitamin B6 kinase)                          | Escherichia coli (strain 55989 / EAEC)         |
| 73597  | 1692548 | 1692913 TY-2482_chromosome | B7LCG4 | Putative uncharacterized protein yfeK                                                                             | Escherichia coli (strain 55989 / EAEC)         |
| 99028  | 1693830 | 1692922 TY-2482_chromosome | B7LCG5 | Cysteine synthase (EC 2.5.1.47)                                                                                   | Escherichia coli (strain 55989 / EAEC)         |
| 100604 | 1695061 | 1693967 TY-2482_chromosome | B7LCG6 | Sulfate/thiosulfate transporter subunit ; ATP-binding component of ABC superfamily (EC 3.6.3.25)                  | Escherichia coli (strain 55989 / EAEC)         |
| 73598  | 1695926 | 1695054 TY-2482_chromosome | B7LCG7 | Sulfate/thiosulfate transporter subunit ; membrane component of ABC superfamily                                   | Escherichia coli (strain 55989 / EAEC)         |
| 114172 | 1696759 | 1695929 TY-2482_chromosome | B7LCG8 | Sulfate/thiosulfate transporter subunit ; membrane component of ABC superfamily                                   | Escherichia coli (strain 55989 / EAEC)         |
| 99030  | 1697775 | 1696762 TY-2482_chromosome | B7LCG9 | Thiosulfate transporter subunit ; periplasmic-binding component of ABC superfamily                                | Escherichia coli (strain 55989 / EAEC)         |
| 77568  | 1698737 | 1697949 TY-2482_chromosome | B7LCH0 | Putative oxidoreductase, sulfate metabolism protein                                                               | Escherichia coli (strain 55989 / EAEC)         |
| 32565  | 1699723 | 1698869 TY-2482_chromosome | B7LCH1 | HTH-type transcriptional regulator murR (MurPQ operon repressor)                                                  | Escherichia coli (strain 55989 / EAEC)         |
| 32561  | 1699887 | 1700780 TY-2482_chromosome | B7LCH2 | N-acetylmuramic acid 6-phosphate etherase (MurNac-6-P etherase) (EC 4.2.1.n1) (N-acetylmuramic acid 6-phosphate   | Escherichia coli (strain 55989 / EAEC)         |
| 90504  | 1700787 | 1702208 TY-2482_chromosome | B7LCH3 | Putative fused PTS enzymes: IIB component ; IIC component                                                         | Escherichia coli (strain 55989 / EAEC)         |
| 77351  | 1702216 | 1703517 TY-2482_chromosome | B7LCH4 | UPF0214 protein yfeW                                                                                              | Escherichia coli (strain 55989 / EAEC)         |
| 108850 | 1704502 | 1703579 TY-2482_chromosome | D3H2T1 | Putative peroxidase                                                                                               | Escherichia coli O44:H18 (strain 042 / EAEC)   |
| 115180 | 1705146 | 1704574 TY-2482_chromosome | B7LCH6 | Putative uncharacterized protein yfeY                                                                             | Escherichia coli (strain 55989 / EAEC)         |
| 64298  | 1705656 | 1705210 TY-2482_chromosome | B7LCH7 | Putative uncharacterized protein yfeZ                                                                             | Escherichia coli (strain 55989 / EAEC)         |
| 25642  | 1706179 | 1705646 TY-2482_chromosome | D3QM21 | Acetyltransferase ypeA                                                                                            | Escherichia coli O55:H7 (strain CB9615 / EPEC) |
| 110584 | 1706282 | 1707148 TY-2482_chromosome | B7LCH9 | N-acetylmuramoyl-L-alanine amidase I (EC 3.5.1.28)                                                                | Escherichia coli (strain 55989 / EAEC)         |
| 113142 | 1707155 | 1708051 TY-2482_chromosome | C8UE11 | Coproporphyrinogen-III oxidase, aerobic (Coprogen oxidase) (Coproporphyrinogenase) (EC 1.3.3.3)                   | Escherichia coli O111:H- (strain 11128 / EHEC) |
| 91799  | 1709112 | 1708063 TY-2482_chromosome | B7LC11 | Putative DNA-binding transcriptional regulator                                                                    | Escherichia coli (strain 55989 / EAEC)         |
| 90369  | 1709658 | 1709161 TY-2482_chromosome | B7LC12 | Putative ethanolaminosome structural protein with putative role in ethanolamine utilization                       | Escherichia coli (strain 55989 / EAEC)         |
| 104487 | 1710330 | 1709674 TY-2482_chromosome | B7LC13 | Putative carboxysome-related structural protein with putative role in ethanolamine utilization                    | Escherichia coli (strain 55989 / EAEC)         |
| 30812  | 1711227 | 1710343 TY-2482_chromosome | B7LC14 | Ethanolamine ammonia-lyase light chain (EC 4.3.1.7) (Ethanolamine ammonia-lyase small subunit)                    | Escherichia coli (strain 55989 / EAEC)         |
| 93256  | 1712609 | 1711251 TY-2482_chromosome | B7LC15 | Ethanolamine ammonia-lyase, large subunit, heavy chain (EC 4.3.1.7)                                               | Escherichia coli (strain 55989 / EAEC)         |
| 106434 | 1714024 | 1712624 TY-2482_chromosome | B7LC16 | Reactivating factor for ethanolamine ammonia lyase                                                                | Escherichia coli (strain 55989 / EAEC)         |
| 62743  | 1715247 | 1714024 TY-2482_chromosome | B7LC17 | Putative ethanolamine transporter                                                                                 | Escherichia coli (strain 55989 / EAEC)         |
| 10612  | 1715563 | 1715312 TY-2482_chromosome | D7Y0Y7 | Putative uncharacterized protein                                                                                  | Escherichia coli MS 115-1                      |
| 84477  | 1716751 | 1715567 TY-2482_chromosome | B7LC18 | Putative alcohol dehydrogenase in ethanolamine utilization; ethanolaminosome                                      | Escherichia coli (strain 55989 / EAEC)         |
| 73639  | 1717577 | 1716744 TY-2482_chromosome | B7LC19 | Putative chaperonin, ethanolamine utilization protein                                                             | Escherichia coli (strain 55989 / EAEC)         |
| 102779 | 1718991 | 1717591 TY-2482_chromosome | B7LCJ0 | Putative aldehyde dehydrogenase, ethanolamine utilization protein                                                 | Escherichia coli (strain 55989 / EAEC)         |
| 57347  | 1719690 | 1719006 TY-2482_chromosome | Q824T7 | Putative ethanolamine utilization protein EutN                                                                    | Salmonella typhi                               |
| 80067  | 1720745 | 1719732 TY-2482_chromosome | B7LCJ3 | Putative phosphotransacetylase subunit                                                                            | Escherichia coli (strain 55989 / EAEC)         |
| 110587 | 1721545 | 1720745 TY-2482_chromosome | B7LCJ4 | Putative cobalamin adenosyltransferase in ethanolamine utilization                                                | Escherichia coli (strain 55989 / EAEC)         |
| 112156 | 1722243 | 1721545 TY-2482_chromosome | B7LCJ5 | Putative uncharacterized protein eutQ                                                                             | Escherichia coli (strain 55989 / EAEC)         |
| 79247  | 1722697 | 1722221 TY-2482_chromosome | B7LCJ6 | Putative nucleoside triphosphate hydrolase domain protein                                                         | Escherichia coli (strain 55989 / EAEC)         |
| 86221  | 1723045 | 1722713 TY-2482_chromosome | B7LCJ7 | Putative carboxysome-like ethanolaminosome structural protein with putative role in ethanol utilization           | Escherichia coli (strain 55989 / EAEC)         |
| 110081 | 1725617 | 1723341 TY-2482_chromosome | B7LCJ8 | Putative fused malic enzyme oxidoreductase ; putative phosphotransacetylase (EC 1.1.1.40) (EC 2.3.1.8)            | Escherichia coli (strain 55989 / EAEC)         |
| 102313 | 1725906 | 1726853 TY-2482_chromosome | B7LCJ9 | Transaldolase 2 (EC 2.2.1.2)                                                                                      | Escherichia coli (strain 55989 / EAEC)         |
| 62680  | 1726876 | 1728876 TY-2482_chromosome | B7LCK0 | Transketolase 2, thiamin-binding (EC 2.2.1.1)                                                                     | Escherichia coli (strain 55989 / EAEC)         |
| 28641  | 1729918 | 1730175 TY-2482_chromosome | Q1R8R2 | Putative uncharacterized protein                                                                                  | Escherichia coli (strain UT189 / UPEC)         |
| 108762 | 1730018 | 1728978 TY-2482_chromosome | B7LCK1 | Putative uncharacterized protein ypfG                                                                             | Escherichia coli (strain 55989 / EAEC)         |
| 84481  | 1730719 | 1730147 TY-2482_chromosome | B7LCK2 | Putative NUDIX hydrolase                                                                                          | Escherichia coli (strain 55989 / EAEC)         |
| 110124 | 1732766 | 1730790 TY-2482_chromosome | B7LCK3 | Fused putative oxidoreductase: FeS binding subunit ; NAD/FAD-binding subunit                                      | Escherichia coli (strain 55989 / EAEC)         |
| 84482  | 1732972 | 1734669 TY-2482_chromosome | B7LCK4 | Sensory histidine kinase in two-component regulatory system with NarP (NarL)                                      | Escherichia coli (strain 55989 / EAEC)         |
| 101266 | 1734836 | 1737946 TY-2482_chromosome | B7LCK5 | Aminoglycoside/multidrug efflux system                                                                            | Escherichia coli (strain 55989 / EAEC)         |
| 12038  | 1737953 | 1738246 TY-2482_chromosome | D7Z185 | Conserved domain protein (Fragment)                                                                               | Escherichia coli MS 69-1                       |
| 112968 | 1738488 | 1738841 TY-2482_chromosome | B7LCK6 | Putative uncharacterized protein yffb                                                                             | Escherichia coli (strain 55989 / EAEC)         |
| 30547  | 1738848 | 1739972 TY-2482_chromosome | B7LCK7 | Succinyl-diaminopimelate desuccinylase (SDAP desuccinylase) (EC 3.5.1.18) (N-succinyl-LL-2,6-diaminoheptanedioate | Escherichia coli (strain 55989 / EAEC)         |
| 35047  | 1740003 | 1740200 TY-2482_chromosome | B7LCK8 | UPF0370 protein ypfN                                                                                              | Escherichia coli (strain 55989 / EAEC)         |
| 60689  | 1741011 | 1740316 TY-2482_chromosome | B7LCK9 | Putative hydrolase                                                                                                | Escherichia coli (strain 55989 / EAEC)         |
| 62682  | 1743100 | 1741088 TY-2482_chromosome | B7LCL0 | Putative hydrolase                                                                                                | Escherichia coli (strain 55989 / EAEC)         |
| 99059  | 1743978 | 1743118 TY-2482_chromosome | B7LCL1 | Putative uncharacterized protein ypfJ                                                                             | Escherichia coli (strain 55989 / EAEC)         |
| 90516  | 1744523 | 1744128 TY-2482_chromosome | B7LCL2 | Putative uncharacterized protein                                                                                  | Escherichia coli (strain 55989 / EAEC)         |
| 82425  | 1744789 | 1744526 TY-2482_chromosome | B7LCL3 | Putative uncharacterized protein                                                                                  | Escherichia coli (strain 55989 / EAEC)         |
| 33147  | 1745618 | 1744908 TY-2482_chromosome | B7LCL4 | Phosphoribosylaminoimidazole-succinocarboxamide synthase (EC 6.3.2.6) (SAICAR synthetase)                         | Escherichia coli (strain 55989 / EAEC)         |
| 24478  | 1745669 | 1745917 TY-2482_chromosome | Q32D89 | Putative uncharacterized protein                                                                                  | Shigella dysenteriae serotype 1 (strain Sd197) |
| 68177  | 1746865 | 1745834 TY-2482_chromosome | B7LCL5 | Lipoprotein                                                                                                       | Escherichia coli (strain 55989 / EAEC)         |
| 30536  | 1747760 | 1746885 TY-2482_chromosome | B7LCL6 | Dihydrodipicolinate synthase (DHDPS) (EC 4.2.1.52)                                                                | Escherichia coli (strain 55989 / EAEC)         |
| 9019   | 1747840 | 1748475 TY-2482_chromosome | C3T0C3 | Transcriptional regulation of gcv operon                                                                          | Escherichia coli                               |
| 97769  | 1748478 | 1748945 TY-2482_chromosome | B7LCL8 | Thiol peroxidase, thioredoxin-dependent (EC 1.11.1.-) (EC 1.11.1.7)                                               | Escherichia coli (strain 55989 / EAEC)         |

|        |         |                            |                                                                        |                                                                                                                       |                                                  |
|--------|---------|----------------------------|------------------------------------------------------------------------|-----------------------------------------------------------------------------------------------------------------------|--------------------------------------------------|
| 110588 | 1749201 | 1749815 TY-2482_chromosome | B7LCL9                                                                 | Hydrogenase 4, 4Fe-4S subunit                                                                                         | Escherichia coli (strain 55989 / EAEC)           |
| 86136  | 1749818 | 1751833 TY-2482_chromosome | B7LCM0                                                                 | Hydrogenase 4, membrane subunit                                                                                       | Escherichia coli (strain 55989 / EAEC)           |
| 100022 | 1751847 | 1752791 TY-2482_chromosome | C8UE52                                                                 | Hydrogenase 4, membrane subunit HyfC                                                                                  | Escherichia coli O111:H- (strain 11128 / EHEC)   |
| 91696  | 1752811 | 1754246 TY-2482_chromosome | B52021                                                                 | Hydrogenase-4 component D                                                                                             | Escherichia coli O157:H7 (strain EC4115 / EHEC)  |
| 112146 | 1754261 | 1754908 TY-2482_chromosome | B7LCM5                                                                 | Hydrogenase 4, membrane subunit                                                                                       | Escherichia coli (strain 55989 / EAEC)           |
| 77305  | 1754916 | 1756493 TY-2482_chromosome | B7LCM6                                                                 | Hydrogenase 4, membrane subunit                                                                                       | Escherichia coli (strain 55989 / EAEC)           |
| 90696  | 1756534 | 1758198 TY-2482_chromosome | B7LCM7                                                                 | Hydrogenase 4, subunit                                                                                                | Escherichia coli (strain 55989 / EAEC)           |
| 110590 | 1758211 | 1758747 TY-2482_chromosome | B7LCM8                                                                 | Hydrogenase 4, Fe-S subunit                                                                                           | Escherichia coli (strain 55989 / EAEC)           |
| 88247  | 1758747 | 1759502 TY-2482_chromosome | B7LCM9                                                                 | Hydrogenase 4, Fe-S subunit                                                                                           | Escherichia coli (strain 55989 / EAEC)           |
| 90517  | 1759498 | 1759908 TY-2482_chromosome | B7LCN0                                                                 | Putative processing element hydrogenase 4                                                                             | Escherichia coli (strain 55989 / EAEC)           |
| 113903 | 1759941 | 1761950 TY-2482_chromosome | B7LCN1                                                                 | DNA-binding transcriptional activator, formate sensing                                                                | Escherichia coli (strain 55989 / EAEC)           |
| 76686  | 1761975 | 1762703 TY-2482_chromosome | B7LCN2                                                                 | Putative formate transporter                                                                                          | Escherichia coli (strain 55989 / EAEC)           |
| 75618  | 1763921 | 1762863 TY-2482_chromosome | B7LCN3                                                                 | Putative permease                                                                                                     | Escherichia coli (strain 55989 / EAEC)           |
| 84500  | 1764134 | 1765594 TY-2482_chromosome | B7LCN4                                                                 | Putative peptidase                                                                                                    | Escherichia coli (strain 55989 / EAEC)           |
| 91407  | 1765618 | 1765974 TY-2482_chromosome | B7LCN5                                                                 | Putative oxidoreductase                                                                                               | Escherichia coli (strain 55989 / EAEC)           |
| 107305 | 1766861 | 1766118 TY-2482_chromosome | C8U815                                                                 | DnaA-homolog protein hda                                                                                              | Escherichia coli O103:H2 (strain 12009 / EHEC)   |
| 110597 | 1768200 | 1766914 TY-2482_chromosome | B7LCN7                                                                 | Uracil transporter                                                                                                    | Escherichia coli (strain 55989 / EAEC)           |
| 34520  | 1768912 | 1768289 TY-2482_chromosome | B7LCN8                                                                 | Uracil phosphoribosyltransferase (EC 2.4.2.9) (UMP pyrophosphorylase) (UPRTase)                                       | Escherichia coli (strain 55989 / EAEC)           |
| 33143  | 1769237 | 1770271 TY-2482_chromosome | B7LCN9                                                                 | Phosphoribosylformylglycinamide cyclo-ligase (EC 6.3.3.1) (AIR synthase) (AIRS) (Phosphoribosyl-aminoimidazole sy     | Escherichia coli (strain 55989 / EAEC)           |
| 71652  | 1770274 | 1770909 TY-2482_chromosome | B7LCP0                                                                 | Phosphoribosylglycinamide formyltransferase 1 (EC 2.1.2.2)                                                            | Escherichia coli (strain 55989 / EAEC)           |
| 88249  | 1771083 | 1773146 TY-2482_chromosome | B7LCP1                                                                 | Polyphosphate kinase (EC 2.7.4.1)                                                                                     | Escherichia coli (strain 55989 / EAEC)           |
| 116070 | 1773154 | 1774692 TY-2482_chromosome | B7LCP2                                                                 | Exopolyphosphatase (EC 3.6.1.11)                                                                                      | Escherichia coli (strain 55989 / EAEC)           |
| 101280 | 1776977 | 1774737 TY-2482_chromosome | B7LCP3                                                                 | Putative uncharacterized protein yfgF                                                                                 | Escherichia coli (strain 55989 / EAEC)           |
| 91801  | 1777484 | 1777197 TY-2482_chromosome | B7LCP4                                                                 | Putative uncharacterized protein                                                                                      | Escherichia coli (strain 55989 / EAEC)           |
| 90587  | 1777831 | 1778346 TY-2482_chromosome | C6UQQ6                                                                 | Predicted outer membrane lipoprotein                                                                                  | Escherichia coli O157:H7 (strain TW14359 / EHEC) |
| 80881  | 1778365 | 1778901 TY-2482_chromosome | B7LCP6                                                                 | Putative uncharacterized protein yfgI                                                                                 | Escherichia coli (strain 55989 / EAEC)           |
| 31308  | 1780574 | 1779000 TY-2482_chromosome | B7LCP7                                                                 | GMP synthase [glutamine-hydrolyzing] (EC 6.3.5.2) (GMP synthetase) (Glutamine amidotransferase)                       | Escherichia coli (strain 55989 / EAEC)           |
| 87883  | 1782109 | 1780646 TY-2482_chromosome | B7LCP8                                                                 | Inosine-5'-monophosphate dehydrogenase (EC 1.1.1.205)                                                                 | Escherichia coli (strain 55989 / EAEC)           |
| 30820  | 1782271 | 1783638 TY-2482_chromosome | B7LCP9                                                                 | Exodeoxyribonuclease 7 large subunit (EC 3.1.11.6) (Exodeoxyribonuclease VII large subunit) (Exonuclease VII large su | Escherichia coli (strain 55989 / EAEC)           |
| 115901 | 1783853 | 1783641 TY-2482_chromosome | B7LCQ0                                                                 | Putative uncharacterized protein yfgJ                                                                                 | Escherichia coli (strain 55989 / EAEC)           |
| 30599  | 1785394 | 1783925 TY-2482_chromosome | B7LCQ1                                                                 | GTPase Der (GTP-binding protein EngA)                                                                                 | Escherichia coli (strain 55989 / EAEC)           |
| 69951  | 1786690 | 1785515 TY-2482_chromosome | B7LCQ2                                                                 | Protein assembly complex, lipoprotein component                                                                       | Escherichia coli (strain 55989 / EAEC)           |
| 95478  | 1787321 | 1786704 TY-2482_chromosome | B7LCQ3                                                                 | Putative uncharacterized protein yfgM                                                                                 | Escherichia coli (strain 55989 / EAEC)           |
| 34115  | 1788613 | 1787342 TY-2482_chromosome | B7LCQ4                                                                 | Histidyl-tRNA synthetase (EC 6.1.1.21) (Histidine--tRNA ligase) (HisRS)                                               | Escherichia coli (strain 55989 / EAEC)           |
| 31700  | 1789842 | 1788727 TY-2482_chromosome | B7LDA7                                                                 | 4-hydroxy-3-methylbut-2-en-1-yl diphosphate synthase (EC 1.17.7.1) (1-hydroxy-2-methyl-2-(E)-butenyl 4-diphosphat     | Escherichia coli (strain 55989 / EAEC)           |
| 33656  | 1790882 | 1789872 TY-2482_chromosome | B7LDA8                                                                 | Cytoskeleton protein rodZ                                                                                             | Escherichia coli (strain 55989 / EAEC)           |
| 33586  | 1792321 | 1791170 TY-2482_chromosome | B7LDA9                                                                 | Ribosomal RNA large subunit methyltransferase N (EC 2.1.1.192) (23S rRNA m2A2503 methyltransferase)                   | Escherichia coli (strain 55989 / EAEC)           |
| 71858  | 1792438 | 1792962 TY-2482_chromosome | D3H3M8                                                                 | Putative uncharacterized protein                                                                                      | Escherichia coli O4:H18 (strain 042 / EAEC)      |
| 102768 | 1795363 | 1793054 TY-2482_chromosome | B7LDB1                                                                 | Fused transglycosylase ; transpeptidase (EC 2.4.1.-) (EC 3.4.-.-)                                                     | Escherichia coli (strain 55989 / EAEC)           |
| 69935  | 1800325 | 1795367 TY-2482_chromosome | B7LDB2                                                                 | Putative uncharacterized protein yfhM                                                                                 | Escherichia coli (strain 55989 / EAEC)           |
| 115877 | 1800532 | 1801374 TY-2482_chromosome | C8TVL6                                                                 | 3-mercaptopyruvate sulfurtransferase                                                                                  | Escherichia coli O26:H11 (strain 11368 / EHEC)   |
| r102   | 1801567 | 1801871 TY-2482_chromosome | ref NC_010473 :2743642-2743945 -  [gene=ryfA] [locus_tag=ECDH10B_2688] |                                                                                                                       |                                                  |
| 61111  | 1802646 | 1801873 TY-2482_chromosome | B7LDB4                                                                 | Rhodanase-like enzyme, sulfur transfer from thiosulfate                                                               | Escherichia coli (strain 55989 / EAEC)           |
| 32926  | 1804071 | 1802791 TY-2482_chromosome | B7LDB5                                                                 | Peptidase B (EC 3.4.11.23) (Aminopeptidase B)                                                                         | Escherichia coli (strain 55989 / EAEC)           |
| 66384  | 1804449 | 1804252 TY-2482_chromosome | B7LDB6                                                                 | Putative uncharacterized protein yfhJ                                                                                 | Escherichia coli (strain 55989 / EAEC)           |
| 99046  | 1804796 | 1804464 TY-2482_chromosome | B7LDB7                                                                 | [2Fe-2S] ferredoxin                                                                                                   | Escherichia coli (strain 55989 / EAEC)           |
| 31528  | 1806648 | 1804801 TY-2482_chromosome | B7LDB8                                                                 | Chaperone protein hscA (Hsc66)                                                                                        | Escherichia coli (strain 55989 / EAEC)           |
| 31540  | 1807180 | 1806668 TY-2482_chromosome | B7LDB9                                                                 | Co-chaperone protein hscB (Hsc20)                                                                                     | Escherichia coli (strain 55989 / EAEC)           |
| 26416  | 1807535 | 1808014 TY-2482_chromosome | Q8FF43                                                                 | Putative uncharacterized protein                                                                                      | Escherichia coli O6                              |
| 91674  | 1807605 | 1807279 TY-2482_chromosome | B52102                                                                 | Iron-binding protein iscA (Iron-sulfur cluster assembly protein)                                                      | Escherichia coli O157:H7 (strain EC4115 / EHEC)  |
| 31684  | 1809244 | 1808033 TY-2482_chromosome | B7LDC2                                                                 | Cysteine desulfurase (EC 2.8.1.7)                                                                                     | Escherichia coli (strain 55989 / EAEC)           |
| 31680  | 1809844 | 1809359 TY-2482_chromosome | B7LDC3                                                                 | HTH-type transcriptional regulator iscR                                                                               | Escherichia coli (strain 55989 / EAEC)           |
| 106416 | 1810854 | 1810117 TY-2482_chromosome | B7LDC4                                                                 | Putative methyltransferase                                                                                            | Escherichia coli (strain 55989 / EAEC)           |
| 116014 | 1810973 | 1811773 TY-2482_chromosome | B7LDC5                                                                 | Inositol monophosphatase (EC 3.1.3.25)                                                                                | Escherichia coli (strain 55989 / EAEC)           |
| 80268  | 1811894 | 1812772 TY-2482_chromosome | B7LDC6                                                                 | Putative peptidase                                                                                                    | Escherichia coli (strain 55989 / EAEC)           |
| 64179  | 1812966 | 1814243 TY-2482_chromosome | B7LDC7                                                                 | Stationary phase inducible protein                                                                                    | Escherichia coli (strain 55989 / EAEC)           |
| 81120  | 1815377 | 1814241 TY-2482_chromosome | B7LDC8                                                                 | Putative 3-phenylpropionic transporter                                                                                | Escherichia coli (strain 55989 / EAEC)           |
| 84458  | 1816427 | 1815540 TY-2482_chromosome | B7LDC9                                                                 | DNA-binding transcriptional activator of 3-phenylpropionic acid catabolism                                            | Escherichia coli (strain 55989 / EAEC)           |
| 73632  | 1816563 | 1817921 TY-2482_chromosome | B7LDD0                                                                 | 3-phenylpropionate dioxygenase, large (Alpha) subunit (EC 1.14.12.19)                                                 | Escherichia coli (strain 55989 / EAEC)           |
| 31324  | 1817921 | 1818436 TY-2482_chromosome | B7LDD1                                                                 | 3-phenylpropionate/cinnamic acid dioxygenase subunit beta (EC 1.14.12.19) (Digoxigenin subunit beta)                  | Escherichia coli (strain 55989 / EAEC)           |
| 112872 | 1818439 | 1818756 TY-2482_chromosome | B7LDD2                                                                 | 3-phenylpropionate dioxygenase, putative ferredoxin subunit                                                           | Escherichia coli (strain 55989 / EAEC)           |
| 31320  | 1818756 | 1819565 TY-2482_chromosome | B7LDD3                                                                 | 3-phenylpropionate-dihydrodiol/cinnamic acid-dihydrodiol dehydrogenase (EC 1.3.1.n1) (2,3-dihydroxy-2,3-dihydroxy     | Escherichia coli (strain 55989 / EAEC)           |
| 31322  | 1819578 | 1820777 TY-2482_chromosome | B7LDD4                                                                 | 3-phenylpropionate/cinnamic acid dioxygenase ferredoxin--NAD(+) reductase component (EC 1.18.1.3) (Digoxigenin        | Escherichia coli (strain 55989 / EAEC)           |
| 86802  | 1820832 | 1821296 TY-2482_chromosome | C8UEB1                                                                 | Predicted inner membrane protein                                                                                      | Escherichia coli O111:H- (strain 11128 / EHEC)   |

|      |        |         |                            |        |                                                                                                                  |                                                 |
|------|--------|---------|----------------------------|--------|------------------------------------------------------------------------------------------------------------------|-------------------------------------------------|
|      | 62662  | 1822219 | 1821350 TY-2482_chromosome | B7LDD6 | Putative uncharacterized protein yphB                                                                            | Escherichia coli (strain 55989 / EAEC)          |
|      | 71529  | 1823292 | 1822234 TY-2482_chromosome | B7LDD7 | Putative oxidoreductase, Zn-dependent and NAD(P)-binding                                                         | Escherichia coli (strain 55989 / EAEC)          |
|      | 65182  | 1824356 | 1823361 TY-2482_chromosome | B7LDD8 | Putative sugar transporter subunit: membrane component of ABC superfamily                                        | Escherichia coli (strain 55989 / EAEC)          |
|      | 79472  | 1825892 | 1824384 TY-2482_chromosome | B7LDD9 | Fused putative sugar transporter subunits of ABC superfamily: ATP-binding components                             | Escherichia coli (strain 55989 / EAEC)          |
|      | 99048  | 1826898 | 1825918 TY-2482_chromosome | B7LDE0 | Putative sugar transporter subunit: periplasmic-binding component of ABC superfamily                             | Escherichia coli (strain 55989 / EAEC)          |
|      | 94159  | 1830276 | 1826998 TY-2482_chromosome | B7LDE1 | Putative uncharacterized protein yphG                                                                            | Escherichia coli (strain 55989 / EAEC)          |
|      | 73633  | 1830394 | 1831584 TY-2482_chromosome | B7LDE2 | Putative DNA-binding transcriptional regulator                                                                   | Escherichia coli (strain 55989 / EAEC)          |
|      | 31181  | 1832904 | 1831654 TY-2482_chromosome | B7LDE3 | Serine hydroxymethyltransferase (SHMT) (Serine methylase) (EC 2.1.2.1)                                           | Escherichia coli (strain 55989 / EAEC)          |
|      | 110577 | 1833232 | 1834419 TY-2482_chromosome | B7LDE4 | Fused nitric oxide dioxygenase ; dihydropteridine reductase 2 (EC 1.14.12.1) (EC 1.5.1.34)                       | Escherichia coli (strain 55989 / EAEC)          |
|      | 58436  | 1834805 | 1834470 TY-2482_chromosome | B7LDE5 | Regulatory protein P-II for glutamine synthetase                                                                 | Escherichia coli (strain 55989 / EAEC)          |
|      | 114160 | 1836200 | 1834869 TY-2482_chromosome | B7LDE6 | Putative DNA-binding response regulator in two-component system                                                  | Escherichia coli (strain 55989 / EAEC)          |
|      | 104716 | 1836903 | 1836193 TY-2482_chromosome | B7LDE7 | Putative uncharacterized protein yfhG                                                                            | Escherichia coli (strain 55989 / EAEC)          |
|      | 67746  | 1838495 | 1837071 TY-2482_chromosome | B7LDE8 | Putative sensory kinase in two-component system                                                                  | Escherichia coli (strain 55989 / EAEC)          |
| r117 |        | 1838737 | 1838589 TY-2482_chromosome |        | ref NC_010473 :2780979-2781127 -  [gene=sroF] [locus_tag=ECDH10B_2724]                                           |                                                 |
|      | 59046  | 1842958 | 1839074 TY-2482_chromosome | B7LDE9 | Phosphoribosylformyl-glycineamide synthetase (EC 6.3.5.3)                                                        | Escherichia coli (strain 55989 / EAEC)          |
|      | 113888 | 1843354 | 1844769 TY-2482_chromosome | B7LDF0 | Putative transglycosylase                                                                                        | Escherichia coli (strain 55989 / EAEC)          |
|      | 101265 | 1845305 | 1844772 TY-2482_chromosome | B7LDF1 | tRNA-specific adenosine deaminase (EC 3.5.4.-)                                                                   | Escherichia coli (strain 55989 / EAEC)          |
|      | 67935  | 1845965 | 1845333 TY-2482_chromosome | B7LDF2 | Putative uncharacterized protein yfhB                                                                            | Escherichia coli (strain 55989 / EAEC)          |
|      | 96742  | 1846102 | 1847019 TY-2482_chromosome | D3H3S1 | RpiR-family transcriptional regulator                                                                            | Escherichia coli O44:H18 (strain 042 / EAEC)    |
|      | 91675  | 1847054 | 1847335 TY-2482_chromosome | B52135 | 4Fe-4S binding domain protein                                                                                    | Escherichia coli O157:H7 (strain EC4115 / EHEC) |
|      | 29698  | 1848412 | 1848035 TY-2482_chromosome | B7LDF6 | Holo-[acyl-carrier-protein] synthase (Holo-ACP synthase) (EC 2.7.8.7) (4'-phosphopantetheinyl transferase AcpP)  | Escherichia coli (strain 55989 / EAEC)          |
|      | 101718 | 1849143 | 1848415 TY-2482_chromosome | B7LDF7 | Pyridoxine 5'-phosphate synthase (PNP synthase) (EC 2.6.99.2)                                                    | Escherichia coli (strain 55989 / EAEC)          |
|      | 73634  | 1849883 | 1849158 TY-2482_chromosome | B7LDF8 | DNA repair protein recO (Recombination protein O)                                                                | Escherichia coli (strain 55989 / EAEC)          |
|      | 30782  | 1850800 | 1849898 TY-2482_chromosome | B7LDF9 | GTPase Era                                                                                                       | Escherichia coli (strain 55989 / EAEC)          |
|      | 33613  | 1851477 | 1850800 TY-2482_chromosome | B7LDG0 | Ribonuclease 3 (EC 3.1.26.3) (Ribonuclease III) (RNase III)                                                      | Escherichia coli (strain 55989 / EAEC)          |
|      | 69558  | 1852724 | 1851753 TY-2482_chromosome | B7LDG1 | Signal peptidase I (EC 3.4.21.89)                                                                                | Escherichia coli (strain 55989 / EAEC)          |
|      | 31846  | 1854539 | 1852743 TY-2482_chromosome | B7LDG2 | Elongation factor 4 (EF-4) (EC 3.6.5.n1) (Ribosomal back-translocase LepA)                                       | Escherichia coli (strain 55989 / EAEC)          |
|      | 64244  | 1855216 | 1854740 TY-2482_chromosome | B7LDG3 | RseC protein involved in reduction of the SoxR iron-sulfur cluster                                               | Escherichia coli (strain 55989 / EAEC)          |
|      | 71559  | 1856169 | 1855216 TY-2482_chromosome | B7LDG4 | Anti-sigma factor                                                                                                | Escherichia coli (strain 55989 / EAEC)          |
|      | 95445  | 1856819 | 1856172 TY-2482_chromosome | B7LDG5 | Anti-sigma factor                                                                                                | Escherichia coli (strain 55989 / EAEC)          |
|      | 61735  | 1857427 | 1856855 TY-2482_chromosome | B7LDG6 | RNA polymerase sigma factor                                                                                      | Escherichia coli (strain 55989 / EAEC)          |
|      | 87204  | 1857835 | 1859454 TY-2482_chromosome | B7LDG7 | Quinolinate synthase, L-aspartate oxidase (B protein) subunit (EC 1.4.3.16)                                      | Escherichia coli (strain 55989 / EAEC)          |
|      | 34336  | 1860179 | 1859445 TY-2482_chromosome | B7LDG8 | tRNA (adenine-N(6)-)-methyltransferase (EC 2.1.1.55) (tRNA m6A37 methyltransferase)                              | Escherichia coli (strain 55989 / EAEC)          |
|      | 97335  | 1860311 | 1861642 TY-2482_chromosome | B7LDG9 | ATP-dependent RNA helicase (EC 2.7.7.-)                                                                          | Escherichia coli (strain 55989 / EAEC)          |
|      | 80383  | 1862780 | 1861857 TY-2482_chromosome | B52151 | Transcriptional regulator, LysR family                                                                           | Escherichia coli O157:H7 (strain EC4115 / EHEC) |
|      | 64826  | 1862838 | 1863422 TY-2482_chromosome | B7LDH1 | Neutral amino-acid efflux system                                                                                 | Escherichia coli (strain 55989 / EAEC)          |
|      | 31220  | 1863863 | 1863483 TY-2482_chromosome | B7LDH2 | Autonomous glycol radical cofactor                                                                               | Escherichia coli (strain 55989 / EAEC)          |
|      | 34510  | 1864168 | 1864854 TY-2482_chromosome | B7LDH3 | Uracil-DNA glycosylase (UDG) (EC 3.2.2.27)                                                                       | Escherichia coli (strain 55989 / EAEC)          |
|      | 95526  | 1865942 | 1864908 TY-2482_chromosome | B7LDH4 | Putative methyltransferase                                                                                       | Escherichia coli (strain 55989 / EAEC)          |
|      | 72622  | 1866149 | 1866565 TY-2482_chromosome | B7LDH6 | Thioredoxin                                                                                                      | Escherichia coli (strain 55989 / EAEC)          |
|      | 115096 | 1866586 | 1867332 TY-2482_chromosome | D3H3U5 | Putative uncharacterized protein                                                                                 | Escherichia coli O44:H18 (strain 042 / EAEC)    |
|      | 72134  | 1867367 | 1870024 TY-2482_chromosome | B7LDH8 | Fused acyl-CoA synthetase: NAD(P)-binding subunit ; ATP-binding subunit (EC 6.2.1.13)                            | Escherichia coli (strain 55989 / EAEC)          |
|      | 67971  | 1870141 | 1871493 TY-2482_chromosome | B7LDH9 | Phosphatidylserine synthase (CDP-diaclylglycerol-serine O-phosphatidyltransferase) (EC 2.7.8.8)                  | Escherichia coli (strain 55989 / EAEC)          |
|      | 66040  | 1871521 | 1871862 TY-2482_chromosome | B52160 | Putative lipoprotein                                                                                             | Escherichia coli O157:H7 (strain EC4115 / EHEC) |
|      | 94823  | 1873160 | 1871865 TY-2482_chromosome | B7LDI1 | Alpha-ketoglutarate transporter                                                                                  | Escherichia coli (strain 55989 / EAEC)          |
|      | 25406  | 1873415 | 1873718 TY-2482_chromosome | Q1RFY5 | Putative uncharacterized protein                                                                                 | Escherichia coli (strain UT189 / UPEC)          |
| r128 |        | 1873603 | 1873484 TY-2482_chromosome |        | ref NC_010473 :4043643-4043762 5S ribosomal RNA [gene=rrfC] [locus_tag=ECDH10B_3948]                             |                                                 |
|      | 22415  | 1873922 | 1874278 TY-2482_chromosome | C1HUN0 | Prolipoprotein diacylglycerol transferase (Fragment)                                                             | Escherichia sp. 3_2_53FAA                       |
|      | 20476  | 1874282 | 1874734 TY-2482_chromosome | C1HUN1 | Cell wall-associated hydrolase (Fragment)                                                                        | Escherichia sp. 3_2_53FAA                       |
|      | 13799  | 1874811 | 1875014 TY-2482_chromosome | C1HUN3 | Putative uncharacterized protein                                                                                 | Escherichia sp. 3_2_53FAA                       |
|      | 24093  | 1876072 | 1876374 TY-2482_chromosome | Q1R3T8 | Putative uncharacterized protein                                                                                 | Escherichia coli (strain UT189 / UPEC)          |
| r4   |        | 1876600 | 1873697 TY-2482_chromosome |        | ref NC_010473 :4307762-4310665 23S ribosomal RNA [gene=rrlE] [locus_tag=ECDH10B_4198]                            |                                                 |
| r320 |        | 1876869 | 1876794 TY-2482_chromosome |        | ref NC_010473 :4307493-4307568 Glu tRNA [gene=glvT] [locus_tag=ECDH10B_4197]                                     |                                                 |
|      | 25827  | 1877461 | 1877144 TY-2482_chromosome | Q57H85 | ORF16-lacZ fusion protein                                                                                        | Salmonella choleraesuis                         |
|      | 11304  | 1878436 | 1878669 TY-2482_chromosome | E9WNY3 | Putative uncharacterized protein                                                                                 | Escherichia coli E1520                          |
| r54  |        | 1878582 | 1877041 TY-2482_chromosome |        | ref NC_010473 :3522988-3524529 16S ribosomal RNA [gene=rrsD] [locus_tag=ECDH10B_3453]                            |                                                 |
|      | 95446  | 1881599 | 1879029 TY-2482_chromosome | B7LDI2 | Protein disaggregation chaperone                                                                                 | Escherichia coli (strain 55989 / EAEC)          |
|      | 113203 | 1882460 | 1881732 TY-2482_chromosome | B7LDI3 | Putative uncharacterized protein yfiH                                                                            | Escherichia coli (strain 55989 / EAEC)          |
|      | 72849  | 1883437 | 1882460 TY-2482_chromosome | B7LDI4 | Pseudouridine synthase (EC 5.4.99.-)                                                                             | Escherichia coli (strain 55989 / EAEC)          |
|      | 73140  | 1883572 | 1884306 TY-2482_chromosome | B7LDI5 | Putative lipoprotein                                                                                             | Escherichia coli (strain 55989 / EAEC)          |
|      | 25508  | 1885035 | 1884502 TY-2482_chromosome | Q1R8C8 | Putative uncharacterized protein                                                                                 | Escherichia coli (strain UT189 / UPEC)          |
|      | 77324  | 1885171 | 1886328 TY-2482_chromosome | B7LDI8 | Fused chorismate mutase P ; prephenate dehydratase (EC 4.2.1.51) (EC 5.4.99.5)                                   | Escherichia coli (strain 55989 / EAEC)          |
|      | 111582 | 1887495 | 1886377 TY-2482_chromosome | B7LDI9 | T-protein                                                                                                        | Escherichia coli (strain 55989 / EAEC)          |
|      | 58643  | 1888576 | 1887509 TY-2482_chromosome | B7LDJ0 | Phospho-2-dehydro-3-deoxyheptulonate aldolase (EC 2.5.1.54) (3-deoxy-D-arabino-heptulonate 7-phosphate synthase) | Escherichia coli (strain 55989 / EAEC)          |

|      |        |         |                            |                                                                              |                                                                                                            |                                                  |
|------|--------|---------|----------------------------|------------------------------------------------------------------------------|------------------------------------------------------------------------------------------------------------|--------------------------------------------------|
|      | 24356  | 1888657 | 1889148 TY-2482_chromosome | B7NRQ4                                                                       | Putative uncharacterized protein                                                                           | Escherichia coli O7:K1 (strain IAI39 / ExPEC)    |
|      | 68820  | 1889301 | 1889816 TY-2482_chromosome | B7LDJ2                                                                       | Putative uncharacterized protein yfiR                                                                      | Escherichia coli (strain 55989 / EAEC)           |
|      | 80875  | 1889809 | 1891032 TY-2482_chromosome | B7LDJ3                                                                       | Putative diguanylate cyclase                                                                               | Escherichia coli (strain 55989 / EAEC)           |
|      | 84460  | 1891051 | 1891530 TY-2482_chromosome | B7LDJ4                                                                       | Putative outer membrane lipoprotein                                                                        | Escherichia coli (strain 55989 / EAEC)           |
|      | 33484  | 1891957 | 1891613 TY-2482_chromosome | B7LDJ5                                                                       | 50S ribosomal protein L19                                                                                  | Escherichia coli (strain 55989 / EAEC)           |
|      | 34329  | 1892766 | 1892002 TY-2482_chromosome | B7LDJ6                                                                       | tRNA (guanine-N(1)-methyltransferase (EC 2.1.1.31) (M1G-methyltransferase) (tRNA [GM37] methyltransferase) | Escherichia coli (strain 55989 / EAEC)           |
|      | 4732   | 1893354 | 1892800 TY-2482_chromosome | Q31XD7                                                                       | Ribosome maturation factor rimM                                                                            | Shigella boydii serotype 4 (strain Sb227)        |
|      | 33720  | 1893612 | 1893367 TY-2482_chromosome | B7LDJ8                                                                       | 30S ribosomal protein S16                                                                                  | Escherichia coli (strain 55989 / EAEC)           |
|      | 80319  | 1895110 | 1893752 TY-2482_chromosome | B7LDJ9                                                                       | Signal Recognition Particle (SRP) component with 4.5S RNA (Ff5)                                            | Escherichia coli (strain 55989 / EAEC)           |
|      | 110579 | 1895202 | 1896065 TY-2482_chromosome | B7LDK0                                                                       | Putative uncharacterized protein ypjD                                                                      | Escherichia coli (strain 55989 / EAEC)           |
|      | 75694  | 1896179 | 1897372 TY-2482_chromosome | B7LDK1                                                                       | Putative uncharacterized protein yfjD                                                                      | Escherichia coli (strain 55989 / EAEC)           |
|      | 24372  | 1897397 | 1898146 TY-2482_chromosome | A1AEE4                                                                       | Putative uncharacterized protein                                                                           | Escherichia coli O1:K1 / APEC                    |
|      | 33054  | 1898146 | 1899021 TY-2482_chromosome | B7LDK3                                                                       | Probable inorganic polyphosphate/ATP-NAD kinase (Poly(P)/ATP NAD kinase) (EC 2.7.1.23)                     | Escherichia coli (strain 55989 / EAEC)           |
|      | 62663  | 1899110 | 1900768 TY-2482_chromosome | B7LDK4                                                                       | Recombination and repair protein                                                                           | Escherichia coli (strain 55989 / EAEC)           |
|      | 93869  | 1900920 | 1901258 TY-2482_chromosome | B7LDK5                                                                       | Small membrane lipoprotein                                                                                 | Escherichia coli (strain 55989 / EAEC)           |
|      | 36018  | 1901631 | 1901326 TY-2482_chromosome | Q5CCH1                                                                       | Putative uncharacterized protein                                                                           | Escherichia coli                                 |
|      | 80876  | 1902079 | 1901606 TY-2482_chromosome | B7LDK7                                                                       | Putative uncharacterized protein yfjG                                                                      | Escherichia coli (strain 55989 / EAEC)           |
|      | 34009  | 1902211 | 1902690 TY-2482_chromosome | B7LDK8                                                                       | SsrA-binding protein (Small protein B)                                                                     | Escherichia coli (strain 55989 / EAEC)           |
| r99  |        | 1902908 | 1903270 TY-2482_chromosome | ref NC_010473 :2845380-2845742 -  [gene=ssrA] [locus_tag=ECDH10B_2787]       |                                                                                                            |                                                  |
|      | 27853  | 1903476 | 1904714 TY-2482_chromosome | B7LDK9                                                                       | Integrase; CP4-57 prophage                                                                                 | Escherichia coli (strain 55989 / EAEC)           |
|      | 26236  | 1908602 | 1904859 TY-2482_chromosome | B7LDL0                                                                       | Putative uncharacterized protein                                                                           | Escherichia coli (strain 55989 / EAEC)           |
|      | 26309  | 1909070 | 1912918 TY-2482_chromosome | B7LDL1                                                                       | Putative uncharacterized protein                                                                           | Escherichia coli (strain 55989 / EAEC)           |
|      | 26572  | 1912967 | 1913710 TY-2482_chromosome | B7LDL2                                                                       | Putative uncharacterized protein                                                                           | Escherichia coli (strain 55989 / EAEC)           |
|      | 28941  | 1915028 | 1914150 TY-2482_chromosome | B7LDL5                                                                       | Putative uncharacterized protein                                                                           | Escherichia coli (strain 55989 / EAEC)           |
|      | 90459  | 1915547 | 1915843 TY-2482_chromosome | B7LDL6                                                                       | Putative GTP-binding factor from putative CP4-like prophage                                                | Escherichia coli (strain 55989 / EAEC)           |
|      | 77325  | 1915867 | 1916211 TY-2482_chromosome | B7LDL7                                                                       | Transposase ORF A, IS3 family                                                                              | Escherichia coli (strain 55989 / EAEC)           |
|      | 59964  | 1916334 | 1917077 TY-2482_chromosome | C8TWQ4                                                                       | Predicted IS602 transposase OrfB                                                                           | Escherichia coli O103:H2 (strain 12009 / EHEC)   |
|      | 24914  | 1917649 | 1917053 TY-2482_chromosome | B7LDL9                                                                       | Putative outer membrane protein                                                                            | Escherichia coli (strain 55989 / EAEC)           |
|      | 29102  | 1917833 | 1918302 TY-2482_chromosome | B7M996                                                                       | Putative uncharacterized protein                                                                           | Escherichia coli O8 (strain IAI1)                |
|      | 75652  | 1919804 | 1918435 TY-2482_chromosome | C6URJ2                                                                       | Putative uncharacterized protein                                                                           | Escherichia coli O157:H7 (strain TW14359 / EHEC) |
| r350 |        | 1920630 | 1920555 TY-2482_chromosome | ref NC_010473 :2875549-2875624  le tRNA [gene=ileY] [locus_tag=ECDH10B_2820] |                                                                                                            |                                                  |
|      | 29380  | 1920648 | 1920322 TY-2482_chromosome | B7LDM3                                                                       | Putative uncharacterized protein                                                                           | Escherichia coli (strain 55989 / EAEC)           |
|      | 94631  | 1921190 | 1923440 TY-2482_chromosome | D3H4R8                                                                       | Alpha-amylase                                                                                              | Escherichia coli O44:H18 (strain 042 / EAEC)     |
|      | 30419  | 1923779 | 1924753 TY-2482_chromosome | B7LDM7                                                                       | Protein CsiD                                                                                               | Escherichia coli (strain 55989 / EAEC)           |
|      | 115660 | 1924776 | 1926041 TY-2482_chromosome | B7LDM8                                                                       | Putative enzyme                                                                                            | Escherichia coli (strain 55989 / EAEC)           |
|      | 64577  | 1926067 | 1927512 TY-2482_chromosome | B7LDM9                                                                       | Succinate-semialdehyde dehydrogenase I, NADP-dependent (EC 1.2.1.16)                                       | Escherichia coli (strain 55989 / EAEC)           |
|      | 86943  | 1927529 | 1928806 TY-2482_chromosome | B7LDN0                                                                       | 4-aminobutyrate aminotransferase, PLP-dependent (EC 2.6.1.19)                                              | Escherichia coli (strain 55989 / EAEC)           |
|      | 110543 | 1929120 | 1930517 TY-2482_chromosome | B7LE81                                                                       | Gamma-aminobutyrate transporter                                                                            | Escherichia coli (strain 55989 / EAEC)           |
|      | 87752  | 1930523 | 1931200 TY-2482_chromosome | D3H4S4                                                                       | GntR-family transcriptional regulator                                                                      | Escherichia coli O44:H18 (strain 042 / EAEC)     |
|      | 83657  | 1931653 | 1931207 TY-2482_chromosome | B7LE82                                                                       | Putative uncharacterized protein ygaU                                                                      | Escherichia coli (strain 55989 / EAEC)           |
|      | 28854  | 1931725 | 1931907 TY-2482_chromosome | Q1R837                                                                       | Putative uncharacterized protein                                                                           | Escherichia coli (strain UT189 / UPEC)           |
|      | 102734 | 1932078 | 1932374 TY-2482_chromosome | B7LE84                                                                       | Putative DNA-binding transcriptional regulator                                                             | Escherichia coli (strain 55989 / EAEC)           |
|      | 71866  | 1932387 | 1932908 TY-2482_chromosome | B7LE85                                                                       | Putative uncharacterized protein ygaP                                                                      | Escherichia coli (strain 55989 / EAEC)           |
|      | 73609  | 1933362 | 1932961 TY-2482_chromosome | B7LE86                                                                       | DNA binding protein, nucleoid-associated                                                                   | Escherichia coli (strain 55989 / EAEC)           |
|      | 97334  | 1934030 | 1934476 TY-2482_chromosome | B7LE87                                                                       | Putative uncharacterized protein ygaW                                                                      | Escherichia coli (strain 55989 / EAEC)           |
|      | 108496 | 1934860 | 1934519 TY-2482_chromosome | B7LE88                                                                       | Putative uncharacterized protein ygaC                                                                      | Escherichia coli (strain 55989 / EAEC)           |
|      | 101586 | 1935000 | 1935338 TY-2482_chromosome | B7LE89                                                                       | Putative uncharacterized protein ygaM                                                                      | Escherichia coli (strain 55989 / EAEC)           |
|      | 88316  | 1935589 | 1935831 TY-2482_chromosome | B7LE90                                                                       | Glutaredoxin-like protein                                                                                  | Escherichia coli (strain 55989 / EAEC)           |
|      | 32710  | 1935831 | 1936238 TY-2482_chromosome | B7LE91                                                                       | Protein nrdI                                                                                               | Escherichia coli (strain 55989 / EAEC)           |
|      | 60868  | 1936214 | 1938355 TY-2482_chromosome | B7LE92                                                                       | Ribonucleoside-diphosphate reductase (EC 1.17.4.1)                                                         | Escherichia coli (strain 55989 / EAEC)           |
|      | 59018  | 1938368 | 1939324 TY-2482_chromosome | B7LE93                                                                       | Ribonucleoside-diphosphate reductase 2, beta subunit, ferritin-like (EC 1.17.4.1)                          | Escherichia coli (strain 55989 / EAEC)           |
|      | 27781  | 1939445 | 1939675 TY-2482_chromosome | Q0TEJ8                                                                       | Putative uncharacterized protein                                                                           | Escherichia coli O6:K15:H31 (strain 536 / UPEC)  |
|      | 102735 | 1939682 | 1940881 TY-2482_chromosome | B7LE94                                                                       | Glycine betaine transporter subunit ; ATP-binding component of ABC superfamily                             | Escherichia coli (strain 55989 / EAEC)           |
|      | 106398 | 1940877 | 1941938 TY-2482_chromosome | B7LE95                                                                       | Glycine betaine transporter subunit ; membrane component of ABC superfamily                                | Escherichia coli (strain 55989 / EAEC)           |
|      | 73611  | 1941998 | 1942987 TY-2482_chromosome | B7LE96                                                                       | Glycine betaine transporter subunit ; periplasmic-binding component of ABC superfamily                     | Escherichia coli (strain 55989 / EAEC)           |
|      | 87439  | 1943182 | 1944363 TY-2482_chromosome | B7LE97                                                                       | Putative transport protein (OusB-like)                                                                     | Escherichia coli (strain 55989 / EAEC)           |
|      | 88206  | 1944490 | 1945224 TY-2482_chromosome | B7LE99                                                                       | Putative transporter                                                                                       | Escherichia coli (strain 55989 / EAEC)           |
|      | 83289  | 1945217 | 1945549 TY-2482_chromosome | B7LE98                                                                       | Putative uncharacterized protein ygaH                                                                      | Escherichia coli (strain 55989 / EAEC)           |
|      | 105627 | 1945643 | 1946170 TY-2482_chromosome | B7LEA0                                                                       | DNA-binding transcriptional repressor of microcin B17 synthesis and multidrug efflux                       | Escherichia coli (strain 55989 / EAEC)           |
|      | 101133 | 1946300 | 1947469 TY-2482_chromosome | B7LEA2                                                                       | Multidrug efflux system                                                                                    | Escherichia coli (strain 55989 / EAEC)           |
|      | 91262  | 1947489 | 1949024 TY-2482_chromosome | B7LEA3                                                                       | Multidrug efflux system protein                                                                            | Escherichia coli (strain 55989 / EAEC)           |
|      | 3005   | 1949606 | 1949094 TY-2482_chromosome | B7LEA1                                                                       | S-ribosylhomocysteine lyase (EC 4.4.1.21) (AI-2 synthesis protein) (Autoinducer-2 production protein luxS) | Escherichia coli (strain 55989 / EAEC)           |
| r477 |        | 1949674 | 1949748 TY-2482_chromosome | ref NC_010473 :2905365-2905439 -  [gene=sraD] [locus_tag=ECDH10B_2855]       |                                                                                                            |                                                  |
|      | 31251  | 1951312 | 1949759 TY-2482_chromosome | B7LEA4                                                                       | Glutamate--cysteine ligase (EC 6.3.2.2) (Gamma-ECS) (GCS) (Gamma-glutamylcysteine synthetase)              | Escherichia coli (strain 55989 / EAEC)           |

|        |         |                            |        |                                                                                                                      |                                                 |
|--------|---------|----------------------------|--------|----------------------------------------------------------------------------------------------------------------------|-------------------------------------------------|
| 112155 | 1951813 | 1951388 TY-2482_chromosome | B7LEA5 | Putative uncharacterized protein yqaA                                                                                | Escherichia coli (strain 55989 / EAEC)          |
| 76051  | 1952376 | 1951813 TY-2482_chromosome | B7LEA6 | Putative hydrolase                                                                                                   | Escherichia coli (strain 55989 / EAEC)          |
| 22845  | 1952687 | 1952409 TY-2482_chromosome | D7Z1T1 | Conserved domain protein (Fragment)                                                                                  | Escherichia coli MS 45-1                        |
| r274   | 1952733 | 1952657 TY-2482_chromosome |        | ref NC_010473 :2909037-2909113 Arg tRNA   [gene=argV] [locus_tag=ECDH10B_2862;                                       |                                                 |
| r273   | 1952873 | 1952797 TY-2482_chromosome |        | ref NC_010473 :2909037-2909113 Arg tRNA   [gene=argV] [locus_tag=ECDH10B_2862;                                       |                                                 |
| r272   | 1953013 | 1952937 TY-2482_chromosome |        | ref NC_010473 :2909037-2909113 Arg tRNA   [gene=argV] [locus_tag=ECDH10B_2862;                                       |                                                 |
| r271   | 1953155 | 1953079 TY-2482_chromosome |        | ref NC_010473 :2909037-2909113 Arg tRNA   [gene=argV] [locus_tag=ECDH10B_2862;                                       |                                                 |
| r270   | 1953296 | 1953220 TY-2482_chromosome |        | ref NC_010473 :2909037-2909113 Arg tRNA   [gene=argV] [locus_tag=ECDH10B_2862;                                       |                                                 |
| 49649  | 1953359 | 1953726 TY-2482_chromosome | Q83SY0 | Putative uncharacterized protein                                                                                     | Salmonella typhi                                |
| r269   | 1953436 | 1953360 TY-2482_chromosome |        | ref NC_010473 :2909037-2909113 Arg tRNA   [gene=argV] [locus_tag=ECDH10B_2862;                                       |                                                 |
| r198   | 1953532 | 1953440 TY-2482_chromosome |        | ref NC_010473 :2909117-2909209 Ser tRNA   [gene=serV] [locus_tag=ECDH10B_2863;                                       |                                                 |
| 99024  | 1956898 | 1954271 TY-2482_chromosome | B7LEA8 | Alanyl-tRNA synthetase (EC 6.1.1.7)                                                                                  | Escherichia coli (strain 55989 / EAEC)          |
| 33311  | 1957526 | 1957029 TY-2482_chromosome | B7LEB0 | Regulatory protein recX                                                                                              | Escherichia coli (strain 55989 / EAEC)          |
| 33296  | 1958830 | 1957772 TY-2482_chromosome | B7LEB1 | Protein RecA (Recombinase A)                                                                                         | Escherichia coli (strain 55989 / EAEC)          |
| 90841  | 1959407 | 1958913 TY-2482_chromosome | B7LEA9 | Putative uncharacterized protein ygaD                                                                                | Escherichia coli (strain 55989 / EAEC)          |
| 59019  | 1960637 | 1959555 TY-2482_chromosome | B7LEB2 | Membrane-bound lytic murein transglycosylase B (EC 3.2.1.-)                                                          | Escherichia coli (strain 55989 / EAEC)          |
| 91789  | 1960893 | 1961453 TY-2482_chromosome | B7LEB3 | Glucitol/sorbitol-specific enzyme IIC component of PTS                                                               | Escherichia coli (strain 55989 / EAEC)          |
| 72281  | 1961453 | 1962409 TY-2482_chromosome | B7LEB4 | Glucitol/sorbitol-specific enzyme IIB component of PTS (EC 2.7.1.69)                                                 | Escherichia coli (strain 55989 / EAEC)          |
| 58074  | 1962423 | 1962791 TY-2482_chromosome | B7LEB5 | Glucitol/sorbitol-specific enzyme IIA component of PTS (EC 2.7.1.69)                                                 | Escherichia coli (strain 55989 / EAEC)          |
| 73612  | 1962798 | 1963574 TY-2482_chromosome | B7LEB6 | Sorbitol-6-phosphate dehydrogenase (EC 1.1.1.140)                                                                    | Escherichia coli (strain 55989 / EAEC)          |
| 86689  | 1963682 | 1964038 TY-2482_chromosome | B7LEB7 | DNA-binding transcriptional activator of glucitol operon                                                             | Escherichia coli (strain 55989 / EAEC)          |
| 76595  | 1964108 | 1964878 TY-2482_chromosome | B7LEB8 | DNA-binding transcriptional repressor                                                                                | Escherichia coli (strain 55989 / EAEC)          |
| 114197 | 1964874 | 1965836 TY-2482_chromosome | B7LEB9 | Putative phosphosugar-binding protein                                                                                | Escherichia coli (strain 55989 / EAEC)          |
| 32668  | 1967350 | 1965839 TY-2482_chromosome | B7LEC0 | Anaerobic nitric oxide reductase transcription regulator norF                                                        | Escherichia coli (strain 55989 / EAEC)          |
| 105314 | 1967537 | 1968973 TY-2482_chromosome | B7LEC1 | Rubredoxin                                                                                                           | Escherichia coli (strain 55989 / EAEC)          |
| 32702  | 1968973 | 1970103 TY-2482_chromosome | B7LEC2 | Nitric oxide reductase FIRd-NAD(+) reductase (EC 1.18.1.-) (Flavorubredoxin reductase) (FIRd-reductase) (FlavoRb red | Escherichia coli (strain 55989 / EAEC)          |
| 62625  | 1972584 | 1970335 TY-2482_chromosome | B7LEC3 | Carbamoyl phosphate phosphatase and maturation protein for [NiFe] hydrogenases                                       | Escherichia coli (strain 55989 / EAEC)          |
| 114199 | 1973264 | 1972740 TY-2482_chromosome | B7LEC4 | Formate dehydrogenase-H, [4Fe-4S] ferredoxin subunit                                                                 | Escherichia coli (strain 55989 / EAEC)          |
| 80962  | 1974426 | 1973416 TY-2482_chromosome | B7LEC5 | DNA-binding transcriptional repressor                                                                                | Escherichia coli (strain 55989 / EAEC)          |
| 874683 | 1974683 | 1976137 TY-2482_chromosome | B7LEC6 | Fused cellobiose/arbutin/salicin-specific PTS enzymes: IIB component ; IIC component (EC 2.7.1.69)                   | Escherichia coli (strain 55989 / EAEC)          |
| 97936  | 1976149 | 1977570 TY-2482_chromosome | B7LEC7 | Cryptic 6-phospho-beta-glucosidase (EC 3.2.1.86)                                                                     | Escherichia coli (strain 55989 / EAEC)          |
| 115752 | 1978721 | 1977744 TY-2482_chromosome | B7LF78 | Transposase, IS110 family                                                                                            | Escherichia coli (strain 55989 / EAEC)          |
| 102758 | 1979451 | 1978969 TY-2482_chromosome | B7LEC9 | Putative HTH-type transcriptional regulator ygiM                                                                     | Escherichia coli (strain 55989 / EAEC)          |
| 91790  | 1980229 | 1979459 TY-2482_chromosome | B7LED0 | Putative uncharacterized protein                                                                                     | Escherichia coli (strain 55989 / EAEC)          |
| 105433 | 1980724 | 1980257 TY-2482_chromosome | B7LED1 | Protease involved in processing C-terminal end of HycE (EC 3.4.-.-)                                                  | Escherichia coli (strain 55989 / EAEC)          |
| 94003  | 1981127 | 1980720 TY-2482_chromosome | B7LED2 | Protein required for maturation of hydrogenase 3                                                                     | Escherichia coli (strain 55989 / EAEC)          |
| 85937  | 1981891 | 1981127 TY-2482_chromosome | D3GRQ1 | Formate hydrogenlyase subunit 7                                                                                      | Escherichia coli O44:H18 (strain O42 / EAEC)    |
| 110551 | 1982433 | 1981894 TY-2482_chromosome | B7LED4 | Formate hydrogenlyase complex iron-sulfur protein (EC 1.12.7.2)                                                      | Escherichia coli (strain 55989 / EAEC)          |
| 102308 | 1984152 | 1982446 TY-2482_chromosome | B7LED5 | Hydrogenase 3, large subunit (EC 1.12.7.2)                                                                           | Escherichia coli (strain 55989 / EAEC)          |
| 116096 | 1985093 | 1984173 TY-2482_chromosome | B7LED6 | Hydrogenase 3, membrane subunit                                                                                      | Escherichia coli (strain 55989 / EAEC)          |
| 66362  | 1986922 | 1985099 TY-2482_chromosome | B7LED7 | Hydrogenase 3, membrane subunit                                                                                      | Escherichia coli (strain 55989 / EAEC)          |
| 114203 | 1987530 | 1986922 TY-2482_chromosome | B7LED8 | Hydrogenase 3, Fe-S subunit (EC 1.12.7.2)                                                                            | Escherichia coli (strain 55989 / EAEC)          |
| 114207 | 1988116 | 1987658 TY-2482_chromosome | B7LED9 | Regulator of the transcriptional regulator FhIA                                                                      | Escherichia coli (strain 55989 / EAEC)          |
| 68925  | 1988315 | 1988674 TY-2482_chromosome | B5Z389 | Probable hydrogenase nickel incorporation protein hypA 1                                                             | Escherichia coli O157:H7 (strain EC4115 / EHEC) |
| 83728  | 1988681 | 1989550 TY-2482_chromosome | B7LEE1 | GTP hydrolase involved in nickel liganding into hydrogenases                                                         | Escherichia coli (strain 55989 / EAEC)          |
| 84083  | 1989544 | 1989813 TY-2482_chromosome | B7LEE2 | Protein required for maturation of hydrogenases 1 and 3                                                              | Escherichia coli (strain 55989 / EAEC)          |
| 95431  | 1989816 | 1990934 TY-2482_chromosome | B7LEE3 | Protein required for maturation of hydrogenases                                                                      | Escherichia coli (strain 55989 / EAEC)          |
| 62163  | 1990976 | 1991941 TY-2482_chromosome | B7LEE4 | Carbamoyl phosphate phosphatase, hydrogenase 3 maturation protein                                                    | Escherichia coli (strain 55989 / EAEC)          |
| 95451  | 1992018 | 1994093 TY-2482_chromosome | B7LEE5 | DNA-binding transcriptional activator                                                                                | Escherichia coli (strain 55989 / EAEC)          |
| 66364  | 1994486 | 1994136 TY-2482_chromosome | B7LEE6 | Putative uncharacterized protein ygbA                                                                                | Escherichia coli (strain 55989 / EAEC)          |
| 11135  | 1994543 | 1994773 TY-2482_chromosome | D7YDC0 | Conserved domain protein                                                                                             | Escherichia coli MS 182-1                       |
| 32579  | 1994773 | 1997331 TY-2482_chromosome | B7LEE7 | DNA mismatch repair protein mutS                                                                                     | Escherichia coli (strain 55989 / EAEC)          |
| 64912  | 1997440 | 1998093 TY-2482_chromosome | B7LEE8 | Serine/threonine-specific protein phosphatase 2 (EC 3.1.3.16)                                                        | Escherichia coli (strain 55989 / EAEC)          |
| 73200  | 1998944 | 1998150 TY-2482_chromosome | B7LEE9 | Putative DNA-binding transcriptional regulator                                                                       | Escherichia coli (strain 55989 / EAEC)          |
| 84445  | 1999110 | 2000015 TY-2482_chromosome | B7LEF0 | Putative dehydrogenase, with NAD(P)-binding Rossmann-fold domain                                                     | Escherichia coli (strain 55989 / EAEC)          |
| 112425 | 2000015 | 2001274 TY-2482_chromosome | B7LEF1 | Putative uncharacterized protein ygbK                                                                                | Escherichia coli (strain 55989 / EAEC)          |
| 82979  | 2001274 | 2001909 TY-2482_chromosome | B7LEF2 | Putative class II aldolase                                                                                           | Escherichia coli (strain 55989 / EAEC)          |
| 77289  | 2001917 | 2002690 TY-2482_chromosome | B7LEF3 | Putative uncharacterized protein ygbM                                                                                | Escherichia coli (strain 55989 / EAEC)          |
| 84447  | 2002782 | 2004143 TY-2482_chromosome | B7LEF4 | Putative transporter                                                                                                 | Escherichia coli (strain 55989 / EAEC)          |
| 105114 | 2004422 | 2004189 TY-2482_chromosome | B7LEF5 | Conserved putative non-oxidative reversible hydroxyarilic acid decarboxylase                                         | Escherichia coli (strain 55989 / EAEC)          |
| 69896  | 2005860 | 2004436 TY-2482_chromosome | B7LEF6 | Conserved putative non-oxidative hydroxyarilic acid decarboxylase activity                                           | Escherichia coli (strain 55989 / EAEC)          |
| 90688  | 2006453 | 2005863 TY-2482_chromosome | B7LEF7 | Conserved putative non-oxidative reversible hydroxyarilic acid decarboxylase                                         | Escherichia coli (strain 55989 / EAEC)          |
| 98369  | 2006600 | 2007004 TY-2482_chromosome | C8TFY8 | Transcriptional regulator                                                                                            | Escherichia coli O26:H11 (strain 11368 / EHEC)  |
| 113036 | 2008120 | 2007131 TY-2482_chromosome | B7LEF8 | RNA polymerase sigma factor                                                                                          | Escherichia coli (strain 55989 / EAEC)          |

|        |         |                            |                                                                       |                                                                                                                        |                                                |
|--------|---------|----------------------------|-----------------------------------------------------------------------|------------------------------------------------------------------------------------------------------------------------|------------------------------------------------|
| 69898  | 2009322 | 2008186 TY-2482_chromosome | B7LEG0                                                                | Outer membrane lipoprotein                                                                                             | Escherichia coli (strain 55989 / EAEC)         |
| 33005  | 2010088 | 2009465 TY-2482_chromosome | B7LEG1                                                                | Protein-L-isoaspartate O-methyltransferase (EC 2.1.1.77) (L-isoaspartyl protein carboxyl methyltransferase) (Protein L | Escherichia coli (strain 55989 / EAEC)         |
| 34076  | 2010843 | 2010085 TY-2482_chromosome | B7LEG2                                                                | Multifunctional protein surE [Includes: 5'/3'-nucleotidase (EC 3.1.3.5) (EC 3.1.3.6) (Nucleoside monophosphate phospho | Escherichia coli (strain 55989 / EAEC)         |
| 34367  | 2011873 | 2010827 TY-2482_chromosome | B7LEG3                                                                | tRNA pseudouridine synthase D (EC 5.4.99.27) (tRNA pseudouridine(13) synthase) (tRNA pseudouridylylate synthase D)     | Escherichia coli (strain 55989 / EAEC)         |
| 31695  | 2012349 | 2011873 TY-2482_chromosome | B7LEG4                                                                | 2-C-methyl-D-erythritol 2,4-cyclodiphosphate synthase (MECDP-synthase) (MECPS) (EC 4.6.1.12)                           | Escherichia coli (strain 55989 / EAEC)         |
| 31687  | 2013059 | 2012352 TY-2482_chromosome | B7LEG5                                                                | 2-C-methyl-D-erythritol 4-phosphate cytidyltransferase (EC 2.7.7.60) (4-diphosphocytidyl-2C-methyl-D-erythritol sy     | Escherichia coli (strain 55989 / EAEC)         |
| 31030  | 2013389 | 2013081 TY-2482_chromosome | B7LEG6                                                                | Cell division protein ftsB homolog                                                                                     | Escherichia coli (strain 55989 / EAEC)         |
| 108567 | 2013906 | 2013586 TY-2482_chromosome | B7LEG7                                                                | Putative uncharacterized protein ygbE                                                                                  | Escherichia coli (strain 55989 / EAEC)         |
| 30499  | 2014561 | 2013959 TY-2482_chromosome | B7LEG8                                                                | Adenylyl-sulfate kinase (EC 2.7.1.25) (APS kinase) (ATP adenosine-5'-phosphosulfate 3'-phosphotransferase) (Adenosi    | Escherichia coli (strain 55989 / EAEC)         |
| 30522  | 2015988 | 2014564 TY-2482_chromosome | B7LEG9                                                                | Sulfate adenylyltransferase subunit 1 (EC 2.7.7.4) (ATP-sulfurylase large subunit) (Sulfate adenylyltransferase) (SAT) | Escherichia coli (strain 55989 / EAEC)         |
| 30503  | 2016898 | 2015993 TY-2482_chromosome | B7LEH0                                                                | Sulfate adenylyltransferase subunit 2 (EC 2.7.7.4) (ATP-sulfurylase small subunit) (Sulfate adenylyltransferase) (SAT  | Escherichia coli (strain 55989 / EAEC)         |
| 97174  | 2017150 | 2018184 TY-2482_chromosome | B7LEH1                                                                | Aminopeptidase in alkaline phosphatase isozyme conversion (EC 3.4.11.-)                                                | Escherichia coli (strain 55989 / EAEC)         |
| 84454  | 2018748 | 2018458 TY-2482_chromosome | B7LEH2                                                                | Putative uncharacterized protein ygbF                                                                                  | Escherichia coli (strain 55989 / EAEC)         |
| 106407 | 2019668 | 2018751 TY-2482_chromosome | B7LEH3                                                                | Putative uncharacterized protein ygbT                                                                                  | Escherichia coli (strain 55989 / EAEC)         |
| 94569  | 2020453 | 2019668 TY-2482_chromosome | B7LEH4                                                                | Putative uncharacterized protein                                                                                       | Escherichia coli (strain 55989 / EAEC)         |
| 87181  | 2022109 | 2021057 TY-2482_chromosome | B7LEH6                                                                | Putative uncharacterized protein                                                                                       | Escherichia coli (strain 55989 / EAEC)         |
| 65363  | 2022657 | 2022124 TY-2482_chromosome | B7LEH7                                                                | Putative uncharacterized protein                                                                                       | Escherichia coli (strain 55989 / EAEC)         |
| 73199  | 2024285 | 2022657 TY-2482_chromosome | B7LEH8                                                                | Putative uncharacterized protein                                                                                       | Escherichia coli (strain 55989 / EAEC)         |
| 73259  | 2027013 | 2024317 TY-2482_chromosome | B7LEH9                                                                | Putative uncharacterized protein                                                                                       | Escherichia coli (strain 55989 / EAEC)         |
| 5323   | 2028479 | 2027370 TY-2482_chromosome | P11901                                                                | Transposase for insertion sequence element IS421                                                                       | Escherichia coli                               |
| 71234  | 2028844 | 2028559 TY-2482_chromosome | D3QPV9                                                                | Small toxic membrane polypeptide                                                                                       | Escherichia coli O55:H7 (strain CB9615 / EPEC) |
| 30511  | 2029707 | 2028976 TY-2482_chromosome | B7LEI1                                                                | Phosphoadenosine phosphosulfate reductase (EC 1.8.4.8) (3'-phosphoadenylylsulfate reductase) (PAPS reductase, thi      | Escherichia coli (strain 55989 / EAEC)         |
| 30514  | 2031493 | 2029784 TY-2482_chromosome | B7LEI2                                                                | Sulfite reductase [NADPH] hemoprotein beta-component (SiR-HP) (SiRHP) (EC 1.8.1.2)                                     | Escherichia coli (strain 55989 / EAEC)         |
| 62627  | 2033292 | 2031496 TY-2482_chromosome | B7LEI3                                                                | Sulfite reductase [NADPH] flavoprotein alpha-component (SiR-FP) (EC 1.8.1.2)                                           | Escherichia coli (strain 55989 / EAEC)         |
| 84507  | 2033608 | 2033970 TY-2482_chromosome | B7LEI4                                                                | 6-pyruvoyl tetrahydrobiopterin synthase (PTPS)                                                                         | Escherichia coli (strain 55989 / EAEC)         |
| 66216  | 2034051 | 2035319 TY-2482_chromosome | B7LEI5                                                                | Putative oxidoreductase with FAD/NAD(P)-binding domain                                                                 | Escherichia coli (strain 55989 / EAEC)         |
| 111775 | 2035313 | 2035570 TY-2482_chromosome | B7LEI6                                                                | Putative 4Fe-4S cluster-containing protein                                                                             | Escherichia coli (strain 55989 / EAEC)         |
| 101197 | 2035590 | 2036162 TY-2482_chromosome | B7LEI8                                                                | Putative anti-terminator regulatory protein                                                                            | Escherichia coli (strain 55989 / EAEC)         |
| 86875  | 2037173 | 2036316 TY-2482_chromosome | B7LEI7                                                                | Putative flavoprotein                                                                                                  | Escherichia coli (strain 55989 / EAEC)         |
| 75115  | 2037949 | 2037173 TY-2482_chromosome | B7LEI9                                                                | Putative flavoprotein                                                                                                  | Escherichia coli (strain 55989 / EAEC)         |
| 80469  | 2039264 | 2037930 TY-2482_chromosome | B7LEJ0                                                                | Putative transporter                                                                                                   | Escherichia coli (strain 55989 / EAEC)         |
| 73679  | 2040812 | 2039361 TY-2482_chromosome | B7LEJ1                                                                | Putative FAD containing dehydrogenase                                                                                  | Escherichia coli (strain 55989 / EAEC)         |
| 96757  | 2041742 | 2040885 TY-2482_chromosome | D3GRV6                                                                | Putative short chain dehydrogenase (EC 1.1.1.69)                                                                       | Escherichia coli O44:H18 (strain 042 / EAEC)   |
| 79777  | 2041986 | 2043260 TY-2482_chromosome | B7LEJ3                                                                | Putative transporter                                                                                                   | Escherichia coli (strain 55989 / EAEC)         |
| 97770  | 2043290 | 2044765 TY-2482_chromosome | B7LEJ4                                                                | Putative kinase                                                                                                        | Escherichia coli (strain 55989 / EAEC)         |
| 14517  | 2045408 | 2045986 TY-2482_chromosome | E7J7X4                                                                | Putative uncharacterized protein                                                                                       | Escherichia coli 1357                          |
| 64994  | 2046995 | 2046327 TY-2482_chromosome | B7LEJ5                                                                | Putative uncharacterized protein ygcF                                                                                  | Escherichia coli (strain 55989 / EAEC)         |
| 108004 | 2047288 | 2048157 TY-2482_chromosome | C8TG25                                                                | Conserved predicted protein                                                                                            | Escherichia coli O26:H11 (strain 11368 / EHEC) |
| 28163  | 2048175 | 2049401 TY-2482_chromosome | Q8FEG8                                                                | Putative uncharacterized protein                                                                                       | Escherichia coli O6                            |
| 33212  | 2051243 | 2049609 TY-2482_chromosome | B7LEK0                                                                | CTP synthase (EC 6.3.4.2) (CTP synthetase) (UTP--ammonia ligase)                                                       | Escherichia coli (strain 55989 / EAEC)         |
| 102799 | 2052262 | 2051474 TY-2482_chromosome | B7LEK1                                                                | Nucleoside triphosphate pyrophosphohydrolase                                                                           | Escherichia coli (strain 55989 / EAEC)         |
| 27425  | 2052585 | 2052944 TY-2482_chromosome | Q1R7R0                                                                | Putative uncharacterized protein                                                                                       | Escherichia coli (strain UT189 / UPEC)         |
| 62712  | 2052668 | 2052336 TY-2482_chromosome | B7LEJ9                                                                | Toxin of the ChpA-ChpR toxin-antitoxin system, endoribonuclease                                                        | Escherichia coli (strain 55989 / EAEC)         |
| 79892  | 2055228 | 2052997 TY-2482_chromosome | B7LEK2                                                                | (P)ppGpp synthetase I/GTP pyrophosphokinase (EC 2.7.6.5)                                                               | Escherichia coli (strain 55989 / EAEC)         |
| 113404 | 2056577 | 2055279 TY-2482_chromosome | B7LEK4                                                                | 23S rRNA (Uracil-5)-methyltransferase (EC 2.1.1.-)                                                                     | Escherichia coli (strain 55989 / EAEC)         |
| 111303 | 2056634 | 2059387 TY-2482_chromosome | C8UAB8                                                                | Hybrid sensory histidine kinase BarY, in two-component regulatory system with UvrY                                     | Escherichia coli O103:H2 (strain 12009 / EHEC) |
| 102829 | 2060962 | 2059625 TY-2482_chromosome | B7LEW6                                                                | (D)-glucarate dehydratase 1 (EC 4.2.1.40)                                                                              | Escherichia coli (strain 55989 / EAEC)         |
| 108354 | 2062323 | 2060986 TY-2482_chromosome | C8TG35                                                                | Putative (D)-glucarate dehydratase 2 GudX                                                                              | Escherichia coli O26:H11 (strain 11368 / EHEC) |
| 73682  | 2063677 | 2062328 TY-2482_chromosome | B7LEW9                                                                | Putative D-glucarate transporter                                                                                       | Escherichia coli (strain 55989 / EAEC)         |
| 95555  | 2064561 | 2064115 TY-2482_chromosome | B7LEX0                                                                | Putative flavoprotein                                                                                                  | Escherichia coli (strain 55989 / EAEC)         |
| 86063  | 2065361 | 2064582 TY-2482_chromosome | B7LEX1                                                                | Pseudouridine synthase (EC 5.4.99.-)                                                                                   | Escherichia coli (strain 55989 / EAEC)         |
| 102831 | 2065690 | 2065364 TY-2482_chromosome | B7LEW7                                                                | Putative uncharacterized protein yqcC                                                                                  | Escherichia coli (strain 55989 / EAEC)         |
| r100   | 2066092 | 2065733 TY-2482_chromosome | ref NC_010473 :3016056-3016415 -  [gene=csrB] [locus_tag=ECDH10B_2961 |                                                                                                                        |                                                |
| 34087  | 2066857 | 2066315 TY-2482_chromosome | B7LEX3                                                                | Protein syd                                                                                                            | Escherichia coli (strain 55989 / EAEC)         |
| 33237  | 2066925 | 2067770 TY-2482_chromosome | B7LEX4                                                                | NADPH-dependent 7-cyano-7-deazaguanine reductase (EC 1.7.1.13) (7-cyano-7-carbaguanine reductase) (NADPH-dep           | Escherichia coli (strain 55989 / EAEC)         |
| 59067  | 2067885 | 2069246 TY-2482_chromosome | B7LEX5                                                                | Putative uncharacterized protein ygdH                                                                                  | Escherichia coli (strain 55989 / EAEC)         |
| 110609 | 2069806 | 2071092 TY-2482_chromosome | B7LEX2                                                                | Putative serine transporter                                                                                            | Escherichia coli (strain 55989 / EAEC)         |
| 106507 | 2071153 | 2072517 TY-2482_chromosome | B7LEX7                                                                | L-serine deaminase II (EC 4.3.1.17)                                                                                    | Escherichia coli (strain 55989 / EAEC)         |
| 87081  | 2072542 | 2073384 TY-2482_chromosome | C8UAD0                                                                | Protein Xni                                                                                                            | Escherichia coli O103:H2 (strain 12009 / EHEC) |
| 102887 | 2074593 | 2073445 TY-2482_chromosome | B7LEX9                                                                | L-1,2-propanediol oxidoreductase (EC 1.1.1.77)                                                                         | Escherichia coli (strain 55989 / EAEC)         |
| 94275  | 2074621 | 2074621 TY-2482_chromosome | B7LEX8                                                                | L-fuculose-1-phosphate aldolase (EC 4.1.2.17)                                                                          | Escherichia coli (strain 55989 / EAEC)         |
| 106510 | 2075812 | 2077125 TY-2482_chromosome | B7LEY1                                                                | L-fucose transporter                                                                                                   | Escherichia coli (strain 55989 / EAEC)         |
| 31038  | 2077161 | 2078933 TY-2482_chromosome | B7LEY2                                                                | L-fucose isomerase (EC 5.3.1.25) (2-deoxy-L-galactose isomerase) (FucIase)                                             | Escherichia coli (strain 55989 / EAEC)         |
| 95556  | 2079015 | 2080460 TY-2482_chromosome | B7LEY0                                                                | L-fuculokinase (EC 2.7.1.51)                                                                                           | Escherichia coli (strain 55989 / EAEC)         |



|        |         |                            |                                  |                                                                                                                       |                                                      |
|--------|---------|----------------------------|----------------------------------|-----------------------------------------------------------------------------------------------------------------------|------------------------------------------------------|
| 31042  | 2080465 | 2080884 TY-2482_chromosome | B7LEY4                           | L-fucose mutarotase (EC 5.1.3.n2) (Fucose 1-epimerase) (Type-2 mutarotase)                                            | Escherichia coli (strain 55989 / EAEC)               |
| 77301  | 2080945 | 2081673 TY-2482_chromosome | B7LEY5                           | DNA-binding transcriptional activator                                                                                 | Escherichia coli (strain 55989 / EAEC)               |
| 33581  | 2082820 | 2081723 TY-2482_chromosome | B7LEY3                           | Ribosomal RNA large subunit methyltransferase M (EC 2.1.1.-) (23S rRNA 2'-O-ribose methyltransferase rlmM)            | Escherichia coli (strain 55989 / EAEC)               |
| 115349 | 2083208 | 2082816 TY-2482_chromosome | B7LEY7                           | Putative uncharacterized protein ygdD                                                                                 | Escherichia coli (strain 55989 / EAEC)               |
| 102891 | 2084144 | 2083230 TY-2482_chromosome | B7LEY8                           | DNA-binding transcriptional dual regulator                                                                            | Escherichia coli (strain 55989 / EAEC)               |
| r107   | 2084273 | 2084478 TY-2482_chromosome | ref NC_010473 :3034596-3034793 - | [gene=gcvB] [locus_tag=ECDH10B_2978]                                                                                  |                                                      |
| 24255  | 2084439 | 2084752 TY-2482_chromosome | B7N743                           | Putative uncharacterized protein                                                                                      | Escherichia coli O17:K52:H18 (strain UMN026 / ExPEC) |
| 81016  | 2084914 | 2086116 TY-2482_chromosome | B7LEZ0                           | Cysteine sulfinate desulfinate (EC 4.4.1.-)                                                                           | Escherichia coli (strain 55989 / EAEC)               |
| 99140  | 2086119 | 2086559 TY-2482_chromosome | B7LEY6                           | Putative Fe-S metabolism protein (SufE-like)                                                                          | Escherichia coli (strain 55989 / EAEC)               |
| 82588  | 2087419 | 2086616 TY-2482_chromosome | B7LEZ2                           | Putative uncharacterized protein ygdL                                                                                 | Escherichia coli (strain 55989 / EAEC)               |
| 73717  | 2088593 | 2087499 TY-2482_chromosome | B7LEZ1                           | Membrane-bound lytic murein transglycosylase A (EC 3.2.1.-)                                                           | Escherichia coli (strain 55989 / EAEC)               |
| r257   | 2088802 | 2088878 TY-2482_chromosome | ref NC_010473 :3039499-3039575   | [Met tRNA] [gene=metV] [locus_tag=ECDH10B_2986]                                                                       |                                                      |
| r258   | 2088912 | 2088988 TY-2482_chromosome | ref NC_010473 :3039499-3039575   | [Met tRNA] [gene=metV] [locus_tag=ECDH10B_2986]                                                                       |                                                      |
| r259   | 2089021 | 2089097 TY-2482_chromosome | ref NC_010473 :3039499-3039575   | [Met tRNA] [gene=metV] [locus_tag=ECDH10B_2986]                                                                       |                                                      |
| 68865  | 2090424 | 2089174 TY-2482_chromosome | B7LEZ4                           | N-acetylmuramoyl-L-alanine amidase (EC 3.5.1.28)                                                                      | Escherichia coli (strain 55989 / EAEC)               |
| 97768  | 2090656 | 2091984 TY-2482_chromosome | B7LEZ5                           | Fused acetylglutamate kinase homolog (inactive) ; amino acid N-acetyltransferase (EC 2.3.1.1)                         | Escherichia coli (strain 55989 / EAEC)               |
| 113400 | 2093875 | 2092052 TY-2482_chromosome | B7LEZ6                           | Exonuclease V (RecBCD complex), alpha chain (EC 3.1.11.5)                                                             | Escherichia coli (strain 55989 / EAEC)               |
| 88317  | 2097417 | 2093878 TY-2482_chromosome | B7LEZ3                           | Exonuclease V (RecBCD complex), beta subunit (EC 3.1.11.5)                                                            | Escherichia coli (strain 55989 / EAEC)               |
| 73646  | 2100298 | 2097413 TY-2482_chromosome | B7LEZ8                           | Protease III (EC 3.4.24.55)                                                                                           | Escherichia coli (strain 55989 / EAEC)               |
| 69294  | 2103842 | 2100477 TY-2482_chromosome | B7LEZ9                           | Exonuclease V (RecBCD complex), gamma chain (EC 3.1.11.5)                                                             | Escherichia coli (strain 55989 / EAEC)               |
| 73645  | 2104178 | 2103858 TY-2482_chromosome | B7LEZ7                           | Prepilin peptidase-dependent protein C                                                                                | Escherichia coli (strain 55989 / EAEC)               |
| 68129  | 2104570 | 2104166 TY-2482_chromosome | B7LF01                           | Putative uncharacterized protein ygdB                                                                                 | Escherichia coli (strain 55989 / EAEC)               |
| 24207  | 2105370 | 2104570 TY-2482_chromosome | A1AF37                           | Prepilin peptidase dependent protein B                                                                                | Escherichia coli O1:K1 / APEC                        |
| 26388  | 2105580 | 2105780 TY-2482_chromosome | Q0TE06                           | Putative uncharacterized protein                                                                                      | Escherichia coli O6:K15:H31 (strain 536 / UPEC)      |
| 34414  | 2106570 | 2105779 TY-2482_chromosome | B7LF04                           | Thymidylate synthase (TS) (TSase) (EC 2.1.1.45)                                                                       | Escherichia coli (strain 55989 / EAEC)               |
| 31881  | 2107452 | 2106580 TY-2482_chromosome | B7LF05                           | Prolipoprotein diacylglycerol transferase (EC 2.4.99.-)                                                               | Escherichia coli (strain 55989 / EAEC)               |
| 93617  | 2109849 | 2107606 TY-2482_chromosome | B7LF06                           | Fused PTS enzyme: PEP-protein phosphotransferase (Enzyme I) ; GAF domain containing protein (EC 2.7.3.9)              | Escherichia coli (strain 55989 / EAEC)               |
| 33682  | 2110392 | 2109865 TY-2482_chromosome | B7LF07                           | RNA pyrophosphohydrolase (EC 3.6.1.-) ((Di)nucleoside polyphosphate hydrolase)                                        | Escherichia coli (strain 55989 / EAEC)               |
| 28802  | 2110704 | 2110895 TY-2482_chromosome | E4P678                           | Putative uncharacterized protein                                                                                      | Escherichia coli O83:H1 (strain NRG 857C / AIEC)     |
| 32571  | 2111077 | 2111763 TY-2482_chromosome | B7LF08                           | DNA mismatch repair protein mutH (Methyl-directed mismatch repair protein)                                            | Escherichia coli (strain 55989 / EAEC)               |
| 100761 | 2111835 | 2112545 TY-2482_chromosome | B7LF09                           | Putative uncharacterized protein ygdQ                                                                                 | Escherichia coli (strain 55989 / EAEC)               |
| 26491  | 2112907 | 2112623 TY-2482_chromosome | Q1R7H9                           | Putative uncharacterized protein                                                                                      | Escherichia coli (strain UTI89 / UPEC)               |
| 102892 | 2113012 | 2114049 TY-2482_chromosome | B7LF11                           | Putative oxidoreductase, NAD(P)(H)-dependent aldo-keto reductase                                                      | Escherichia coli (strain 55989 / EAEC)               |
| 31950  | 2115277 | 2114087 TY-2482_chromosome | B7LF12                           | Lysophospholipid transporter lplT                                                                                     | Escherichia coli (strain 55989 / EAEC)               |
| 29638  | 2117429 | 2115273 TY-2482_chromosome | B7LF13                           | Bifunctional protein aas [Includes: 2-acylglycerophosphoethanolamine acyltransferase (EC 2.3.1.40) (2-acyl-GPE acylti | Escherichia coli (strain 55989 / EAEC)               |
| 13165  | 2117526 | 2117819 TY-2482_chromosome | E6AX10                           | Conserved domain protein (Fragment)                                                                                   | Escherichia coli MS 16-3                             |
| r202   | 2117604 | 2117517 TY-2482_chromosome | ref NC_010473 :3067994-3068081 - | [gene=rygA] [locus_tag=ECDH10B_3007]                                                                                  |                                                      |
| 25148  | 2117720 | 2117932 TY-2482_chromosome | Q8FEA4                           | Putative uncharacterized protein                                                                                      | Escherichia coli O6                                  |
| r349   | 2117801 | 2117726 TY-2482_chromosome | ref NC_010473 :3068202-3068277 - | [gene=rygB] [locus_tag=ECDH10B_3008]                                                                                  |                                                      |
| 87765  | 2118015 | 2119043 TY-2482_chromosome | B7LF02                           | DNA-binding transcriptional repressor                                                                                 | Escherichia coli (strain 55989 / EAEC)               |
| 113401 | 2120315 | 2119056 TY-2482_chromosome | B7LF15                           | Diaminopimelate decarboxylase (EC 4.1.1.20)                                                                           | Escherichia coli (strain 55989 / EAEC)               |
| 106512 | 2120437 | 2121369 TY-2482_chromosome | B7LF16                           | DNA-binding transcriptional dual regulator                                                                            | Escherichia coli (strain 55989 / EAEC)               |
| 109503 | 2122051 | 2121362 TY-2482_chromosome | B7LF17                           | Putative racemase                                                                                                     | Escherichia coli (strain 55989 / EAEC)               |
| 77405  | 2123598 | 2122183 TY-2482_chromosome | B7LF18                           | Arabinose transporter                                                                                                 | Escherichia coli (strain 55989 / EAEC)               |
| 76827  | 2124722 | 2123964 TY-2482_chromosome | B7LF19                           | 2-deoxy-D-gluconate 3-dehydrogenase (EC 1.1.1.125)                                                                    | Escherichia coli (strain 55989 / EAEC)               |
| 31753  | 2125588 | 2124755 TY-2482_chromosome | B7LF20                           | 4-deoxy-L-threo-5-hexosulose-uronate ketol-isomerase (EC 5.3.1.17) (5-keto-4-deoxyuronate isomerase) (DKI isomerase)  | Escherichia coli (strain 55989 / EAEC)               |
| 77408  | 2127056 | 2125878 TY-2482_chromosome | B7LF21                           | Acetyl-CoA acetyltransferase (EC 2.3.1.9)                                                                             | Escherichia coli (strain 55989 / EAEC)               |
| 91900  | 2127311 | 2128537 TY-2482_chromosome | B7LF14                           | Putative transporter                                                                                                  | Escherichia coli (strain 55989 / EAEC)               |
| 88391  | 2129000 | 2129629 TY-2482_chromosome | B7LF23                           | Putative uncharacterized protein yqeH                                                                                 | Escherichia coli (strain 55989 / EAEC)               |
| 69922  | 2129966 | 2130772 TY-2482_chromosome | B7LF22                           | Putative transcriptional regulator                                                                                    | Escherichia coli (strain 55989 / EAEC)               |
| 105106 | 2130768 | 2131247 TY-2482_chromosome | B7LF25                           | Putative uncharacterized protein yqeJ                                                                                 | Escherichia coli (strain 55989 / EAEC)               |
| 95557  | 2131824 | 2131402 TY-2482_chromosome | B7LF26                           | Putative uncharacterized protein yqeK                                                                                 | Escherichia coli (strain 55989 / EAEC)               |
| 90642  | 2132018 | 2132452 TY-2482_chromosome | B7LF24                           | Putative uncharacterized protein yqeF                                                                                 | Escherichia coli (strain 55989 / EAEC)               |
| 81018  | 2132733 | 2133221 TY-2482_chromosome | B7LF28                           | Putative chaperone                                                                                                    | Escherichia coli (strain 55989 / EAEC)               |
| 83456  | 2133559 | 2134932 TY-2482_chromosome | B7LF27                           | Putative transcriptional regulator                                                                                    | Escherichia coli (strain 55989 / EAEC)               |
| 97064  | 2135103 | 2135318 TY-2482_chromosome | B7LF30                           | Putative uncharacterized protein yqeI                                                                                 | Escherichia coli (strain 55989 / EAEC)               |
| 88510  | 2135404 | 2135877 TY-2482_chromosome | B7LF31                           | Putative peptidoglycan-binding-like protein                                                                           | Escherichia coli (strain 55989 / EAEC)               |
| 67624  | 2136557 | 2135928 TY-2482_chromosome | D3GSV2                           | Putative two-component response regulator                                                                             | Escherichia coli O44:H18 (strain 042 / EAEC)         |
| 114045 | 2137209 | 2136781 TY-2482_chromosome | B7LF33                           | Putative uncharacterized protein yqeM                                                                                 | Escherichia coli (strain 55989 / EAEC)               |
| 81019  | 2138007 | 2137429 TY-2482_chromosome | B7LF35                           | Putative uncharacterized protein                                                                                      | Escherichia coli (strain 55989 / EAEC)               |
| 64177  | 2138757 | 2138026 TY-2482_chromosome | B7LF36                           | Putative Type III secretion system lipoprotein EprK                                                                   | Escherichia coli (strain 55989 / EAEC)               |
| 91753  | 2139085 | 2138757 TY-2482_chromosome | B5Z4H9                           | Type III secretion apparatus protein EprJ                                                                             | Escherichia coli O157:H7 (strain EC4115 / EHEC)      |
| 100416 | 2139345 | 2139108 TY-2482_chromosome | D3GSV7                           | Type III secretion system protein                                                                                     | Escherichia coli O44:H18 (strain 042 / EAEC)         |
| 73718  | 2140549 | 2139362 TY-2482_chromosome | B7LF39                           | Putative Type III secretion EprH protein                                                                              | Escherichia coli (strain 55989 / EAEC)               |

|        |         |                            |                                                                               |                                                                                                                   |                                                 |
|--------|---------|----------------------------|-------------------------------------------------------------------------------|-------------------------------------------------------------------------------------------------------------------|-------------------------------------------------|
| 110384 | 2140798 | 2141295 TY-2482_chromosome | B7LF38                                                                        | Putative uncharacterized protein                                                                                  | Escherichia coli (strain 55989 / EAEC)          |
| 76046  | 2141300 | 2141590 TY-2482_chromosome | B7LF41                                                                        | Putative uncharacterized protein                                                                                  | Escherichia coli (strain 55989 / EAEC)          |
| 107896 | 2142764 | 2141658 TY-2482_chromosome | B5Z4I3                                                                        | Putative uncharacterized protein                                                                                  | Escherichia coli O157:H7 (strain EC4115 / EHEC) |
| 94306  | 2143540 | 2142776 TY-2482_chromosome | B7LF43                                                                        | Putative Type III secretion protein EpaR                                                                          | Escherichia coli (strain 55989 / EAEC)          |
| 109703 | 2143802 | 2143545 TY-2482_chromosome | B5Z4I4                                                                        | Type III secretion apparatus protein EpaQ                                                                         | Escherichia coli O157:H7 (strain EC4115 / EHEC) |
| 110385 | 2144477 | 2143815 TY-2482_chromosome | B7LF47                                                                        | Putative type III secretion system protein EpaP                                                                   | Escherichia coli (strain 55989 / EAEC)          |
| 15584  | 2145414 | 2144395 TY-2482_chromosome | Q35BB5                                                                        | EpaO                                                                                                              | Escherichia coli                                |
| 112170 | 2147198 | 2145549 TY-2482_chromosome | B7LF50                                                                        | Putative uncharacterized protein                                                                                  | Escherichia coli (strain 55989 / EAEC)          |
| r499   | 2147463 | 2147390 TY-2482_chromosome | ref NC_010473 :3090876-3090949 Gly tRNA  [gene=glyU] [locus_tag=ECDH10B_3039] |                                                                                                                   |                                                 |
| 109400 | 2148297 | 2147545 TY-2482_chromosome | B7LF51                                                                        | Tetratricopeptide repeat transcriptional regulator                                                                | Escherichia coli (strain 55989 / EAEC)          |
| 14388  | 2148485 | 2148297 TY-2482_chromosome | E6BGA4                                                                        | Formate dehydrogenase accessory protein FdhD                                                                      | Escherichia coli MS 85-1                        |
| 115566 | 2148751 | 2151006 TY-2482_chromosome | B7LF45                                                                        | Xanthine dehydrogenase, molybdenum binding subunit                                                                | Escherichia coli (strain 55989 / EAEC)          |
| 66261  | 2151020 | 2151895 TY-2482_chromosome | B7LF53                                                                        | Xanthine dehydrogenase, FAD-binding subunit                                                                       | Escherichia coli (strain 55989 / EAEC)          |
| 70012  | 2151895 | 2152371 TY-2482_chromosome | B7LF54                                                                        | Xanthine dehydrogenase, Fe-S binding subunit                                                                      | Escherichia coli (strain 55989 / EAEC)          |
| 70000  | 2154192 | 2152417 TY-2482_chromosome | B7LF52                                                                        | Putative DNA-binding transcriptional regulator                                                                    | Escherichia coli (strain 55989 / EAEC)          |
| 65429  | 2154668 | 2155855 TY-2482_chromosome | B7LF55                                                                        | Putative uncharacterized protein ygeW                                                                             | Escherichia coli (strain 55989 / EAEC)          |
| 91903  | 2155916 | 2157109 TY-2482_chromosome | B7LF57                                                                        | 2,3-diaminopropionate ammonia-lyase (EC 4.3.1.15)                                                                 | Escherichia coli (strain 55989 / EAEC)          |
| 110388 | 2157170 | 2158378 TY-2482_chromosome | B7LF58                                                                        | Putative peptidase                                                                                                | Escherichia coli (strain 55989 / EAEC)          |
| 32998  | 2158434 | 2159816 TY-2482_chromosome | B7LF59                                                                        | D-phenylhydantoinase (EC 3.5.2.-) (Hydantoin-utilizing enzyme hyuA)                                               | Escherichia coli (strain 55989 / EAEC)          |
| 110389 | 2159867 | 2160796 TY-2482_chromosome | B7LF60                                                                        | Amino acid (Carbamate) kinase (EC 2.7.2.2)                                                                        | Escherichia coli (strain 55989 / EAEC)          |
| 105493 | 2162465 | 2160843 TY-2482_chromosome | B7LF61                                                                        | Putative uncharacterized protein yqeB                                                                             | Escherichia coli (strain 55989 / EAEC)          |
| 110387 | 2163283 | 2162516 TY-2482_chromosome | B7LF56                                                                        | Putative uncharacterized protein yqeC                                                                             | Escherichia coli (strain 55989 / EAEC)          |
| 87558  | 2163386 | 2163961 TY-2482_chromosome | B7LF63                                                                        | Putative uncharacterized protein ygfJ                                                                             | Escherichia coli (strain 55989 / EAEC)          |
| 105945 | 2164286 | 2167381 TY-2482_chromosome | B7LF64                                                                        | Putative oxidoreductase, Fe-S subunit                                                                             | Escherichia coli (strain 55989 / EAEC)          |
| 73719  | 2167387 | 2168712 TY-2482_chromosome | B7LF62                                                                        | Putative chlorohydrolase/aminohydrolase                                                                           | Escherichia coli (strain 55989 / EAEC)          |
| 91904  | 2168766 | 2169542 TY-2482_chromosome | B7LF66                                                                        | Putative oxidoreductase                                                                                           | Escherichia coli (strain 55989 / EAEC)          |
| 102832 | 2169542 | 2172409 TY-2482_chromosome | B7LF67                                                                        | Fused putative xanthine/hypoxanthine oxidase: molybdopterin-binding subunit ; Fe-S binding subunit                | Escherichia coli (strain 55989 / EAEC)          |
| 91867  | 2172577 | 2173974 TY-2482_chromosome | B7LF65                                                                        | Putative transporter                                                                                              | Escherichia coli (strain 55989 / EAEC)          |
| 73721  | 2173992 | 2175308 TY-2482_chromosome | B7LF69                                                                        | Guanine deaminase (EC 3.5.4.3)                                                                                    | Escherichia coli (strain 55989 / EAEC)          |
| 96955  | 2175347 | 2176711 TY-2482_chromosome | B7LF70                                                                        | Putative transporter                                                                                              | Escherichia coli (strain 55989 / EAEC)          |
| 66262  | 2177238 | 2176753 TY-2482_chromosome | B7LF68                                                                        | Putative oxidoreductase, 4Fe-4S ferredoxin-type subunit                                                           | Escherichia coli (strain 55989 / EAEC)          |
| 102899 | 2179157 | 2177241 TY-2482_chromosome | B7LF72                                                                        | Fused putative oxidoreductase: Fe-S subunit ; nucleotide-binding subunit                                          | Escherichia coli (strain 55989 / EAEC)          |
| 76352  | 2179593 | 2181038 TY-2482_chromosome | B7LF73                                                                        | Transporter                                                                                                       | Escherichia coli (strain 55989 / EAEC)          |
| 115744 | 2181291 | 2181836 TY-2482_chromosome | B7LF71                                                                        | Isopentenyl-diphosphate Delta-isomerase 1 (IPP isomerase 1) (EC 5.3.3.2) (IPP:DMAPP isomerase 1) (Isopentenyl pyr | Escherichia coli (strain 55989 / EAEC)          |
| 77414  | 2183399 | 2181885 TY-2482_chromosome | B7LF75                                                                        | Lysyl-tRNA synthetase 1 (EC 6.1.1.6) (Lysine--tRNA ligase 1)                                                      | Escherichia coli (strain 55989 / EAEC)          |
| 33325  | 2184507 | 2183412 TY-2482_chromosome | B7LF76                                                                        | Peptide chain release factor 2 (RF-2)                                                                             | Escherichia coli (strain 55989 / EAEC)          |
| 62708  | 2186331 | 2184601 TY-2482_chromosome | B7LF77                                                                        | SsDNA exonuclease, 5'-> 3'-specific (EC 3.1.-.-)                                                                  | Escherichia coli (strain 55989 / EAEC)          |
| 111580 | 2187047 | 2186340 TY-2482_chromosome | B7LF74                                                                        | Protein disulfide isomerase II (EC 5.3.4.1)                                                                       | Escherichia coli (strain 55989 / EAEC)          |
| 81021  | 2187968 | 2187075 TY-2482_chromosome | B7LF79                                                                        | Site-specific tyrosine recombinase                                                                                | Escherichia coli (strain 55989 / EAEC)          |
| 98018  | 2188080 | 2188598 TY-2482_chromosome | B7LF80                                                                        | Flavodoxin 2                                                                                                      | Escherichia coli (strain 55989 / EAEC)          |
| 114049 | 2189048 | 2188644 TY-2482_chromosome | B7LF81                                                                        | Putative uncharacterized protein ygfX                                                                             | Escherichia coli (strain 55989 / EAEC)          |
| 81023  | 2189295 | 2189032 TY-2482_chromosome | B7LF82                                                                        | Putative uncharacterized protein ygfY                                                                             | Escherichia coli (strain 55989 / EAEC)          |
| 34929  | 2189538 | 2190515 TY-2482_chromosome | B7LF83                                                                        | tRNA-modifying protein ygfZ                                                                                       | Escherichia coli (strain 55989 / EAEC)          |
| 40516  | 2191285 | 2190599 TY-2482_chromosome | D8A3I5                                                                        | Channel protein, hemolysin III family protein                                                                     | Escherichia coli MS 21-1                        |
| 35054  | 2191730 | 2191422 TY-2482_chromosome | B7LF85                                                                        | UPF0267 protein yqfB                                                                                              | Escherichia coli (strain 55989 / EAEC)          |
| 114050 | 2191769 | 2193205 TY-2482_chromosome | B7LF86                                                                        | 6-phospho-beta-glucosidase A (EC 3.2.1.86)                                                                        | Escherichia coli (strain 55989 / EAEC)          |
| 79013  | 2194008 | 2193268 TY-2482_chromosome | B7LF88                                                                        | Putative NAD(P)-binding oxidoreductase with NAD(P)-binding Rossmann-fold domain                                   | Escherichia coli (strain 55989 / EAEC)          |
| 31097  | 2197142 | 2194272 TY-2482_chromosome | B7LF89                                                                        | Glycine dehydrogenase [decarboxylating] (EC 1.4.4.2) (Glycine cleavage system P-protein) (Glycine decarboxylase)  | Escherichia coli (strain 55989 / EAEC)          |
| 31093  | 2197650 | 2197264 TY-2482_chromosome | B7LF90                                                                        | Glycine cleavage system H protein                                                                                 | Escherichia coli (strain 55989 / EAEC)          |
| 31101  | 2198768 | 2197677 TY-2482_chromosome | B7LF91                                                                        | Aminomethyltransferase (EC 2.1.2.10) (Glycine cleavage system T protein)                                          | Escherichia coli (strain 55989 / EAEC)          |
| 66269  | 2200418 | 2199219 TY-2482_chromosome | B7LF87                                                                        | Putative oxidoreductase with FAD/NAD(P)-binding domain                                                            | Escherichia coli (strain 55989 / EAEC)          |
| 90460  | 2201619 | 2200444 TY-2482_chromosome | B7LF93                                                                        | 2-octaprenyl-6-methoxyphenol hydroxylase, FAD/NAD(P)-binding (EC 1.14.-.-)                                        | Escherichia coli (strain 55989 / EAEC)          |
| 77314  | 2202941 | 2201619 TY-2482_chromosome | B7LF92                                                                        | Proline aminopeptidase P II (EC 3.4.11.9)                                                                         | Escherichia coli (strain 55989 / EAEC)          |
| 74940  | 2203551 | 2202970 TY-2482_chromosome | D3GT53                                                                        | UPF0149 protein ygfB                                                                                              | Escherichia coli O44:H18 (strain 042 / EAEC)    |
| 18887  | 2203576 | 2203761 TY-2482_chromosome | D6JEQ2                                                                        | Predicted protein                                                                                                 | Escherichia coli B354                           |
| 35075  | 2203713 | 2204039 TY-2482_chromosome | B7LF69                                                                        | Cell division protein ZapA (Z ring-associated protein ZapA)                                                       | Escherichia coli (strain 55989 / EAEC)          |
| r106   | 2204084 | 2204266 TY-2482_chromosome | ref NC_010473 :3147875-3148057 -  [gene=ssrS] [locus_tag=ECDH10B_3085]        |                                                                                                                   |                                                 |
| 26194  | 2204144 | 2204887 TY-2482_chromosome | A8A452                                                                        | 5,10-methylnetetrahydrofolate synthetase (EC 6.3.3.2)                                                             | Escherichia coli O9:H4 (strain HS)              |
| r122   | 2204916 | 2205066 TY-2482_chromosome | ref NC_010473 :3148707-3148857 -  [gene=rygC] [locus_tag=ECDH10B_3087]        |                                                                                                                   |                                                 |
| 20821  | 2205275 | 2205066 TY-2482_chromosome | E11F6                                                                         | Putative uncharacterized protein (Fragment)                                                                       | Escherichia coli MS 78-1                        |
| r123   | 2205308 | 2205455 TY-2482_chromosome | ref NC_010473 :3148707-3148857 -  [gene=rygC] [locus_tag=ECDH10B_3087]        |                                                                                                                   |                                                 |
| 94916  | 2206903 | 2205674 TY-2482_chromosome | B7LF67                                                                        | D-3-phosphoglycerate dehydrogenase (EC 1.1.1.95)                                                                  | Escherichia coli (strain 55989 / EAEC)          |
| 4838   | 2207854 | 2207162 TY-2482_chromosome | A1AFA2                                                                        | Ribose-5-phosphate isomerase A (EC 5.3.1.6) (Phosphoriboisomerase A) (PRI)                                        | Escherichia coli O1:K1 / APEC                   |
| 17763  | 2208108 | 2207908 TY-2482_chromosome | D7YB63                                                                        | Conserved domain protein                                                                                          | Escherichia coli MS 115-1                       |

|        |         |                            |               |                                                                                                     |                                                 |
|--------|---------|----------------------------|---------------|-----------------------------------------------------------------------------------------------------|-------------------------------------------------|
| 31583  | 2208201 | 2209091 TY-2482_chromosome | B7LFH3        | Chromosome initiation inhibitor (OriC replication inhibitor)                                        | Escherichia coli (strain 55989 / EAEC)          |
| 98513  | 2209298 | 2211439 TY-2482_chromosome | B5YQ80        | Methylmalonyl-CoA mutase (EC 5.4.99.2)                                                              | Escherichia coli O157:H7 (strain EC4115 / EHEC) |
| 91837  | 2211435 | 2212427 TY-2482_chromosome | B7LFH1        | Membrane ATPase/protein kinase                                                                      | Escherichia coli (strain 55989 / EAEC)          |
| 99198  | 2212441 | 2213223 TY-2482_chromosome | B7LFH7        | Methylmalonyl-CoA decarboxylase, biotin-independent (EC 4.1.1.41)                                   | Escherichia coli (strain 55989 / EAEC)          |
| 114102 | 2213250 | 2214725 TY-2482_chromosome | B7LFH6        | Propionyl-CoA:succinate-CoA transferase (EC 2.8.3.-)                                                | Escherichia coli (strain 55989 / EAEC)          |
| 14393  | 2215621 | 2214673 TY-2482_chromosome | E9W1W1        | LysR family bacterial regulatory helix-turn-helix protein                                           | Escherichia coli E1520                          |
| 70065  | 2216528 | 2215791 TY-2482_chromosome | B7LF10        | Putative uncharacterized protein yggE                                                               | Escherichia coli (strain 55989 / EAEC)          |
| 62818  | 2217256 | 2216624 TY-2482_chromosome | B7LFH8        | Arginine exporter protein ArgO                                                                      | Escherichia coli (strain 55989 / EAEC)          |
| 95635  | 2218255 | 2217398 TY-2482_chromosome | B7LF12        | Mechanosensitive channel                                                                            | Escherichia coli (strain 55989 / EAEC)          |
| 76398  | 2219692 | 2218616 TY-2482_chromosome | B7LF11        | Fructose-bisphosphate aldolase, class II (EC 4.1.2.13)                                              | Escherichia coli (strain 55989 / EAEC)          |
| 81074  | 2221070 | 2219910 TY-2482_chromosome | B7LF14        | Phosphoglycerate kinase (EC 2.7.2.3)                                                                | Escherichia coli (strain 55989 / EAEC)          |
| 30708  | 2222139 | 2221123 TY-2482_chromosome | B7LF13        | D-erythrose-4-phosphate dehydrogenase [E4PDH] (EC 1.2.1.72)                                         | Escherichia coli (strain 55989 / EAEC)          |
| 59186  | 2222511 | 2222939 TY-2482_chromosome | B7LF16        | Putative uncharacterized protein                                                                    | Escherichia coli (strain 55989 / EAEC)          |
| 62819  | 2222866 | 2223540 TY-2482_chromosome | B7LF15        | Putative ABC-type transport system                                                                  | Escherichia coli (strain 55989 / EAEC)          |
| 91838  | 2223544 | 2224248 TY-2482_chromosome | B7LF18        | Putative ABC-type transport system                                                                  | Escherichia coli (strain 55989 / EAEC)          |
| 64739  | 2224233 | 2224913 TY-2482_chromosome | B7LF19        | Putative ATP-binding protein of ABC transport system                                                | Escherichia coli (strain 55989 / EAEC)          |
| 84641  | 2224877 | 2225584 TY-2482_chromosome | B7LF17        | Putative ATP-binding protein of ABC transport system                                                | Escherichia coli (strain 55989 / EAEC)          |
| 99207  | 2226272 | 2225562 TY-2482_chromosome | B7LFJ1        | Putative uncharacterized protein yggC                                                               | Escherichia coli (strain 55989 / EAEC)          |
| 62747  | 2226778 | 2226272 TY-2482_chromosome | B7LFJ2        | Putative DNA-binding transcriptional regulator                                                      | Escherichia coli (strain 55989 / EAEC)          |
| 114111 | 2227765 | 2226803 TY-2482_chromosome | B7LFJ0        | Putative hexoseP phosphatase                                                                        | Escherichia coli (strain 55989 / EAEC)          |
| 111640 | 2229039 | 2227765 TY-2482_chromosome | B7LFJ4        | Putative dehydrogenase                                                                              | Escherichia coli (strain 55989 / EAEC)          |
| 57979  | 2230442 | 2229057 TY-2482_chromosome | B7LFJ5        | Fused mannitol-specific PTS enzymes: IIB component ; IIC component (EC 2.7.1.69)                    | Escherichia coli (strain 55989 / EAEC)          |
| 105098 | 2230913 | 2230473 TY-2482_chromosome | B7LFJ3        | Putative mannitol-specific enzyme IIA component of PTS                                              | Escherichia coli (strain 55989 / EAEC)          |
| 101495 | 2231174 | 2230926 TY-2482_chromosome | D3GTU6        | Putative uncharacterized protein                                                                    | Escherichia coli O44:H18 (strain 042 / EAEC)    |
| 102943 | 2233218 | 2231230 TY-2482_chromosome | B7LFJ7        | Transketolase 1, thiamin-binding (EC 2.2.1.1)                                                       | Escherichia coli (strain 55989 / EAEC)          |
| 108413 | 2233370 | 2234251 TY-2482_chromosome | D3GTU9        | Putative peptidase                                                                                  | Escherichia coli O44:H18 (strain 042 / EAEC)    |
| 20414  | 2234307 | 2235320 TY-2482_chromosome | Q47649        | ORF1; putative                                                                                      | Escherichia coli                                |
| 72279  | 2236247 | 2235519 TY-2482_chromosome | B7LFJ9        | Putative uncharacterized protein                                                                    | Escherichia coli (strain 55989 / EAEC)          |
| 102016 | 2238369 | 2236396 TY-2482_chromosome | B7LFK0        | Biosynthetic arginine decarboxylase (ADC) (EC 4.1.1.19)                                             | Escherichia coli (strain 55989 / EAEC)          |
| 110495 | 2238645 | 2238857 TY-2482_chromosome | B7LFK3        | Putative uncharacterized protein yggC                                                               | Escherichia coli (strain 55989 / EAEC)          |
| 62823  | 2239108 | 2238860 TY-2482_chromosome | B7LFK1        | Putative uncharacterized protein yggD                                                               | Escherichia coli (strain 55989 / EAEC)          |
| 32279  | 2239164 | 2240315 TY-2482_chromosome | B7LFK4        | S-adenosylmethionine synthase (AdoMet synthase) (EC 2.5.1.6) (MAT) (Methionine adenosyltransferase) | Escherichia coli (strain 55989 / EAEC)          |
| 19949  | 2240341 | 2240592 TY-2482_chromosome | D7YXP3        | Putative uncharacterized protein (Fragment)                                                         | Escherichia coli MS 45-1                        |
| 101626 | 2240754 | 2242145 TY-2482_chromosome | B7LFK6        | D-galactose transporter                                                                             | Escherichia coli (strain 55989 / EAEC)          |
| 115403 | 2242174 | 2242719 TY-2482_chromosome | B5YQE2        | Protein sprT                                                                                        | Escherichia coli O157:H7 (strain EC4115 / EHEC) |
| 87119  | 2242817 | 2243521 TY-2482_chromosome | B7LFK5        | DNA-specific endonuclease I (EC 3.1.21.1)                                                           | Escherichia coli (strain 55989 / EAEC)          |
| 87561  | 2243604 | 2244332 TY-2482_chromosome | B7LFK9        | Putative uncharacterized protein yggJ                                                               | Escherichia coli (strain 55989 / EAEC)          |
| 91302  | 2244348 | 2245295 TY-2482_chromosome | B7LF10        | Glutathione synthetase (EC 6.3.2.3)                                                                 | Escherichia coli (strain 55989 / EAEC)          |
| 35057  | 2245407 | 2245967 TY-2482_chromosome | B7LF11        | UPF0301 protein yggE                                                                                | Escherichia coli (strain 55989 / EAEC)          |
| 33880  | 2245970 | 2246383 TY-2482_chromosome | B7LF12        | Putative Holliday junction resolvase (EC 3.1.-.-)                                                   | Escherichia coli (strain 55989 / EAEC)          |
| 109824 | 2247542 | 2246565 TY-2482_chromosome | B7LFK8        | Transporter                                                                                         | Escherichia coli (strain 55989 / EAEC)          |
| 69519  | 2247560 | 2248261 TY-2482_chromosome | B7LF14        | Putative enzyme                                                                                     | Escherichia coli (strain 55989 / EAEC)          |
| 95650  | 2248282 | 2248845 TY-2482_chromosome | B7LF15        | Putative uncharacterized protein yggT                                                               | Escherichia coli (strain 55989 / EAEC)          |
| 34933  | 2248845 | 2249132 TY-2482_chromosome | B7LF16        | UPF0235 protein yggU                                                                                | Escherichia coli (strain 55989 / EAEC)          |
| 98117  | 2249143 | 2249733 TY-2482_chromosome | B7LF17        | Nucleoside-triphosphatase rdgB (EC 3.6.1.15) (Nucleoside triphosphate phosphohydrolase)             | Escherichia coli (strain 55989 / EAEC)          |
| 68946  | 2249729 | 2250862 TY-2482_chromosome | B7LF18        | Putative oxidoreductase                                                                             | Escherichia coli (strain 55989 / EAEC)          |
| 62824  | 2252027 | 2251023 TY-2482_chromosome | B7LF13        | Putative uncharacterized protein yggM                                                               | Escherichia coli (strain 55989 / EAEC)          |
| 102945 | 2253190 | 2252147 TY-2482_chromosome | B7LFM0        | Periplasmic L-asparaginase II (EC 3.5.1.1)                                                          | Escherichia coli (strain 55989 / EAEC)          |
| 88465  | 2254085 | 2253369 TY-2482_chromosome | B7LF19        | Putative uncharacterized protein yggN                                                               | Escherichia coli (strain 55989 / EAEC)          |
| 104494 | 2254595 | 2254272 TY-2482_chromosome | B7LFM2        | Putative uncharacterized protein yggL                                                               | Escherichia coli (strain 55989 / EAEC)          |
| 110496 | 2255314 | 2254598 TY-2482_chromosome | B7LFM3        | tRNA (guanine-N(7)-)-methyltransferase (EC 2.1.1.33) (tRNA(m7G46)-methyltransferase)                | Escherichia coli (strain 55989 / EAEC)          |
| 65595  | 2255475 | 2256524 TY-2482_chromosome | B7LFM4        | Adenine DNA glycosylase (EC 3.2.2.-)                                                                | Escherichia coli (strain 55989 / EAEC)          |
| 16406  | 2256555 | 2256864 TY-2482_chromosome | E7HG43        | Bacterial Fe(2+) trafficking family protein                                                         | Escherichia coli EPECa14                        |
| 32413  | 2256895 | 2257971 TY-2482_chromosome | B7LFM1        | Membrane-bound lytic murein transglycosylase C (EC 3.2.1.-) (Murein hydrolase C)                    | Escherichia coli (strain 55989 / EAEC)          |
| 73791  | 2258176 | 2259429 TY-2482_chromosome | B7LFM7        | Nucleoside transporter                                                                              | Escherichia coli (strain 55989 / EAEC)          |
| 116133 | 2261617 | 2259485 TY-2482_chromosome | B7LFM6        | Ornithine decarboxylase, constitutive (EC 4.1.1.17)                                                 | Escherichia coli (strain 55989 / EAEC)          |
| 24688  | 2261900 | 2261700 TY-2482_chromosome | Q1R759        | Putative uncharacterized protein                                                                    | Escherichia coli (strain UT189 / UPEC)          |
| 81080  | 2262015 | 2262719 TY-2482_chromosome | B7LFM9        | Putative uncharacterized protein yggA                                                               | Escherichia coli (strain 55989 / EAEC)          |
| 61103  | 2262789 | 2263034 TY-2482_chromosome | B7LB23        | Putative uncharacterized protein                                                                    | Escherichia coli (strain 55989 / EAEC)          |
| r318   | 2262828 | 2262903 TY-2482_chromosome | ref NC_010473 | :4460936-4461011 Phe tRNA  [gene=pheU] [locus_tag=ECDH10B_4327.                                     |                                                 |
| 81081  | 2263101 | 2264360 TY-2482_chromosome | B7LFN0        | Prophage integrase                                                                                  | Escherichia coli (strain 55989 / EAEC)          |
| 14366  | 2264776 | 2265470 TY-2482_chromosome | E1U309        | Transposase InsAB'                                                                                  | Escherichia coli                                |
| 9387   | 2265584 | 2265874 TY-2482_chromosome | B3Y1G8        | Predicted protein                                                                                   | Escherichia coli O111:H-                        |
| 84564  | 2266936 | 2266346 TY-2482_chromosome | B7LFN2        | Putative uncharacterized protein                                                                    | Escherichia coli (strain 55989 / EAEC)          |

|        |         |                            |        |                                                                                             |                                                 |
|--------|---------|----------------------------|--------|---------------------------------------------------------------------------------------------|-------------------------------------------------|
| 26997  | 2267133 | 2266867 TY-2482_chromosome | B7LFM8 | Putative uncharacterized protein                                                            | Escherichia coli (strain 55989 / EAEC)          |
| 27356  | 2267329 | 2270193 TY-2482_chromosome | B7LFN4 | Helicase                                                                                    | Escherichia coli (strain 55989 / EAEC)          |
| 83096  | 2270198 | 2271199 TY-2482_chromosome | B7LFN3 | Putative uncharacterized protein                                                            | Escherichia coli (strain 55989 / EAEC)          |
| 110497 | 2271212 | 2273596 TY-2482_chromosome | B7LFN6 | Putative uncharacterized protein                                                            | Escherichia coli (strain 55989 / EAEC)          |
| 82510  | 2273609 | 2275234 TY-2482_chromosome | B7LFN7 | DNA methylase N-4/N-6 (EC 2.1.1.72)                                                         | Escherichia coli (strain 55989 / EAEC)          |
| 62825  | 2275240 | 2278107 TY-2482_chromosome | B7LFN5 | Putative PstII restriction-modification enzyme Res subunit                                  | Escherichia coli (strain 55989 / EAEC)          |
| 24347  | 2278199 | 2278489 TY-2482_chromosome | B7LFN8 | Putative uncharacterized protein                                                            | Escherichia coli (strain 55989 / EAEC)          |
| 73794  | 2278526 | 2278909 TY-2482_chromosome | B7LFN9 | Transposase ORF A, IS3 family                                                               | Escherichia coli (strain 55989 / EAEC)          |
| 56696  | 2279983 | 2278835 TY-2482_chromosome | B7LEP8 | IS30 transposase; KpLE2 phage-like element                                                  | Escherichia coli (strain 55989 / EAEC)          |
| 23302  | 2280048 | 2280536 TY-2482_chromosome | Q6Q6S9 | Transposase                                                                                 | Escherichia coli                                |
| 8448   | 2281060 | 2280755 TY-2482_chromosome | P71290 | Orf58 protein                                                                               | Escherichia coli                                |
| 52535  | 2281131 | 2282651 TY-2482_chromosome | B7LBU5 | Putative reverse transcriptase-like protein from putative prophage or plasmid (EC 2.7.7.49) | Escherichia coli (strain 55989 / EAEC)          |
| 26334  | 2282729 | 2283226 TY-2482_chromosome | Q327G0 | IS629 ORF2                                                                                  | Shigella dysenteriae serotype 1 (strain Sd197)  |
| 55299  | 2283382 | 2287497 TY-2482_chromosome | B7LBW0 | Serine protease pic (ShMu)                                                                  | Escherichia coli (strain 55989 / EAEC)          |
| 10661  | 2287905 | 2287597 TY-2482_chromosome | B3IA48 | Transposase                                                                                 | Escherichia coli E22                            |
| 43232  | 2288601 | 2287935 TY-2482_chromosome | Q5K5W0 | Putative uncharacterized protein                                                            | Escherichia coli                                |
| 93002  | 2288791 | 2289051 TY-2482_chromosome | D3GV17 | Transposase                                                                                 | Escherichia coli O44:H18 (strain 042 / EAEC)    |
| 73799  | 2289085 | 2290695 TY-2482_chromosome | B7LFP0 | Putative uncharacterized protein                                                            | Escherichia coli (strain 55989 / EAEC)          |
| 8412   | 2291489 | 2290887 TY-2482_chromosome | B3I233 | Integrase, catalytic region                                                                 | Escherichia coli E22                            |
| 105044 | 2292566 | 2291436 TY-2482_chromosome | B7LX19 | Putative transposase, IS110 family                                                          | Escherichia coli (strain 55989 / EAEC)          |
| 108663 | 2292615 | 2292812 TY-2482_chromosome | B7LXB6 | Putative uncharacterized protein                                                            | Escherichia coli (strain 55989 / EAEC)          |
| 90581  | 2293496 | 2293092 TY-2482_chromosome | D3GV13 | Putative uncharacterized protein                                                            | Escherichia coli O44:H18 (strain 042 / EAEC)    |
| 108257 | 2295035 | 2293884 TY-2482_chromosome | D3GV12 | Putative uncharacterized protein                                                            | Escherichia coli O44:H18 (strain 042 / EAEC)    |
| 101211 | 2295497 | 2295145 TY-2482_chromosome | B7LWV5 | Transposase ORF A, IS629                                                                    | Escherichia coli (strain 55989 / EAEC)          |
| 101247 | 2296080 | 2295517 TY-2482_chromosome | D3GV09 | Putative uncharacterized protein                                                            | Escherichia coli O44:H18 (strain 042 / EAEC)    |
| 86915  | 2296922 | 2296670 TY-2482_chromosome | D3GV08 | Putative uncharacterized protein                                                            | Escherichia coli O44:H18 (strain 042 / EAEC)    |
| 26335  | 2298326 | 2297829 TY-2482_chromosome | Q327G0 | IS629 ORF2                                                                                  | Shigella dysenteriae serotype 1 (strain Sd197)  |
| 52536  | 2299924 | 2298404 TY-2482_chromosome | B7LBU5 | Putative reverse transcriptase-like protein from putative prophage or plasmid (EC 2.7.7.49) | Escherichia coli (strain 55989 / EAEC)          |
| 8447   | 2299995 | 2300300 TY-2482_chromosome | P71290 | Orf58 protein                                                                               | Escherichia coli                                |
| 16056  | 2300218 | 2300586 TY-2482_chromosome | Q9S110 | Orf57 protein                                                                               | Escherichia coli                                |
| 27674  | 2301089 | 2300519 TY-2482_chromosome | B7LFP9 | Transposase ORF B, IS629                                                                    | Escherichia coli (strain 55989 / EAEC)          |
| 29410  | 2304066 | 2301520 TY-2482_chromosome | B7LFOQ | Putative uncharacterized protein                                                            | Escherichia coli (strain 55989 / EAEC)          |
| 26998  | 2307483 | 2304073 TY-2482_chromosome | B7LFP6 | Putative uncharacterized protein                                                            | Escherichia coli (strain 55989 / EAEC)          |
| 27175  | 2308082 | 2307483 TY-2482_chromosome | B7LFO2 | Putative uncharacterized protein                                                            | Escherichia coli (strain 55989 / EAEC)          |
| 25270  | 2308381 | 2308070 TY-2482_chromosome | B7LFO1 | Putative uncharacterized protein                                                            | Escherichia coli (strain 55989 / EAEC)          |
| 26577  | 2309839 | 2308412 TY-2482_chromosome | B7LFO4 | Putative uncharacterized protein                                                            | Escherichia coli (strain 55989 / EAEC)          |
| 24593  | 2310394 | 2309843 TY-2482_chromosome | B7LFO5 | Putative uncharacterized protein                                                            | Escherichia coli (strain 55989 / EAEC)          |
| 29396  | 2311475 | 2310402 TY-2482_chromosome | B7LFO6 | Putative uncharacterized protein                                                            | Escherichia coli (strain 55989 / EAEC)          |
| 24689  | 2311784 | 2311482 TY-2482_chromosome | B7LFO7 | Putative uncharacterized protein                                                            | Escherichia coli (strain 55989 / EAEC)          |
| 29191  | 2312255 | 2311791 TY-2482_chromosome | B7LFO3 | Putative uncharacterized protein                                                            | Escherichia coli (strain 55989 / EAEC)          |
| 24162  | 2314248 | 2312269 TY-2482_chromosome | B7LFO9 | Putative uncharacterized protein                                                            | Escherichia coli (strain 55989 / EAEC)          |
| 28502  | 2315220 | 2314264 TY-2482_chromosome | B7LFR0 | Putative uncharacterized protein                                                            | Escherichia coli (strain 55989 / EAEC)          |
| 27814  | 2316986 | 2315187 TY-2482_chromosome | B7LFR1 | Putative uncharacterized protein                                                            | Escherichia coli (strain 55989 / EAEC)          |
| 28039  | 2317401 | 2316982 TY-2482_chromosome | B7LFR2 | Putative uncharacterized protein                                                            | Escherichia coli (strain 55989 / EAEC)          |
| 25651  | 2317917 | 2317414 TY-2482_chromosome | B7LFR3 | Putative uncharacterized protein                                                            | Escherichia coli (strain 55989 / EAEC)          |
| 67799  | 2319405 | 2317930 TY-2482_chromosome | B7LFR8 | Putative uncharacterized protein                                                            | Escherichia coli (strain 55989 / EAEC)          |
| 102853 | 2319884 | 2319411 TY-2482_chromosome | B7LFR5 | Putative uncharacterized protein                                                            | Escherichia coli (strain 55989 / EAEC)          |
| 7598   | 2320280 | 2321307 TY-2482_chromosome | P16943 | Insertion element IS630 uncharacterized 39 kDa protein (ISO-IS200 39 kDa protein)           | Shigella sonnei                                 |
| 25710  | 2321904 | 2321422 TY-2482_chromosome | B7LFS0 | Putative uncharacterized protein                                                            | Escherichia coli (strain 55989 / EAEC)          |
| 20585  | 2321982 | 2322591 TY-2482_chromosome | D8EKF9 | Integrase core domain protein                                                               | Escherichia coli MS 107-1                       |
| 69991  | 2322948 | 2322628 TY-2482_chromosome | B7LFS4 | Putative uncharacterized protein                                                            | Escherichia coli (strain 55989 / EAEC)          |
| 89972  | 2323658 | 2323017 TY-2482_chromosome | B7LFS2 | Putative uncharacterized protein                                                            | Escherichia coli (strain 55989 / EAEC)          |
| 62717  | 2323987 | 2323682 TY-2482_chromosome | B7LFS6 | Putative uncharacterized protein                                                            | Escherichia coli (strain 55989 / EAEC)          |
| 101309 | 2324614 | 2324312 TY-2482_chromosome | D3GUY0 | Putative uncharacterized protein                                                            | Escherichia coli O44:H18 (strain 042 / EAEC)    |
| 73647  | 2326466 | 2324682 TY-2482_chromosome | B7LFT1 | Putative UvrD/REP helicase                                                                  | Escherichia coli (strain 55989 / EAEC)          |
| 24351  | 2327826 | 2326663 TY-2482_chromosome | B7LFT2 | Putative uncharacterized protein                                                            | Escherichia coli (strain 55989 / EAEC)          |
| 25236  | 2329367 | 2328009 TY-2482_chromosome | B7LG71 | Putative uncharacterized protein                                                            | Escherichia coli (strain 55989 / EAEC)          |
| 25915  | 2329910 | 2329392 TY-2482_chromosome | B7LG72 | Putative uncharacterized protein                                                            | Escherichia coli (strain 55989 / EAEC)          |
| 28465  | 2330686 | 2330414 TY-2482_chromosome | E3PN47 | Putative uncharacterized protein                                                            | Escherichia coli O78:H11 (strain H10407 / ETEC) |
| 66386  | 2330945 | 2330640 TY-2482_chromosome | B7LG74 | Putative uncharacterized protein                                                            | Escherichia coli (strain 55989 / EAEC)          |
| 101413 | 2331625 | 2330969 TY-2482_chromosome | B7LG70 | Putative uncharacterized protein                                                            | Escherichia coli (strain 55989 / EAEC)          |
| 28816  | 2332371 | 2331901 TY-2482_chromosome | B7LG76 | Putative uncharacterized protein                                                            | Escherichia coli (strain 55989 / EAEC)          |
| 106515 | 2332696 | 2332310 TY-2482_chromosome | B7LG75 | Putative uncharacterized protein                                                            | Escherichia coli (strain 55989 / EAEC)          |
| 97486  | 2333427 | 2332861 TY-2482_chromosome | B7LG78 | Putative uncharacterized protein                                                            | Escherichia coli (strain 55989 / EAEC)          |

|        |         |                            |        |                                                                                                     |                                                   |
|--------|---------|----------------------------|--------|-----------------------------------------------------------------------------------------------------|---------------------------------------------------|
| 25603  | 2333877 | 2333677 TY-2482_chromosome | B7LG80 | Putative uncharacterized protein                                                                    | Escherichia coli (strain 55989 / EAEC)            |
| 68254  | 2334337 | 2334047 TY-2482_chromosome | Q0TDJ8 | Putative hemolysin expression modulating protein                                                    | Escherichia coli O6:K15:H31 (strain 536 / UPEC)   |
| 71239  | 2334883 | 2335158 TY-2482_chromosome | D3GU29 | Putative phage-related regulatory protein                                                           | Escherichia coli O44:H18 (strain 042 / EAEC)      |
| 86266  | 2335220 | 2335816 TY-2482_chromosome | B7LG83 | Putative uncharacterized protein                                                                    | Escherichia coli (strain 55989 / EAEC)            |
| 105223 | 2335895 | 2336155 TY-2482_chromosome | D3GU27 | Putative uncharacterized protein                                                                    | Escherichia coli O44:H18 (strain 042 / EAEC)      |
| 21539  | 2336333 | 2336148 TY-2482_chromosome | D8AG23 | Putative uncharacterized protein                                                                    | Escherichia coli MS 21-1                          |
| 27417  | 2337314 | 2338330 TY-2482_chromosome | B7LG85 | Putative uncharacterized protein                                                                    | Escherichia coli (strain 55989 / EAEC)            |
| 104659 | 2338311 | 2339312 TY-2482_chromosome | C8TV65 | Putative uncharacterized protein                                                                    | Escherichia coli O26:H11 (strain 11368 / EHEC)    |
| 102141 | 2339643 | 2342765 TY-2482_chromosome | B7LG82 | Antigen 43 (Ag43) phase-variable biofilm formation autotransporter; CP4-44 prophage                 | Escherichia coli (strain 55989 / EAEC)            |
| 86965  | 2342883 | 2345402 TY-2482_chromosome | B7LG88 | Putative uncharacterized protein                                                                    | Escherichia coli (strain 55989 / EAEC)            |
| 79239  | 2345481 | 2345933 TY-2482_chromosome | B7LG89 | Putative uncharacterized protein                                                                    | Escherichia coli (strain 55989 / EAEC)            |
| 78892  | 2346015 | 2346245 TY-2482_chromosome | B7LG87 | Putative uncharacterized protein                                                                    | Escherichia coli (strain 55989 / EAEC)            |
| 106469 | 2346348 | 2347163 TY-2482_chromosome | B7LG91 | Putative uncharacterized protein                                                                    | Escherichia coli (strain 55989 / EAEC)            |
| 47870  | 2348421 | 2347465 TY-2482_chromosome | Q5K5L6 | Putative uncharacterized protein                                                                    | Escherichia coli                                  |
| 22617  | 2349072 | 2349218 TY-2482_chromosome | E9TQB2 | Conserved domain protein (Fragment)                                                                 | Escherichia coli MS 60-1                          |
| 81024  | 2349140 | 2349619 TY-2482_chromosome | B7LG96 | Toxin of the YeeV-YeeU toxin-antitoxin system                                                       | Escherichia coli (strain 55989 / EAEC)            |
| 107832 | 2349619 | 2350038 TY-2482_chromosome | B7LG97 | Putative uncharacterized protein yeeW                                                               | Escherichia coli (strain 55989 / EAEC)            |
| 62718  | 2350126 | 2350965 TY-2482_chromosome | B7LG90 | Putative uncharacterized protein                                                                    | Escherichia coli (strain 55989 / EAEC)            |
| 81029  | 2351785 | 2351252 TY-2482_chromosome | B7LG99 | Putative secretion pathway M-type protein, membrane anchored                                        | Escherichia coli (strain 55989 / EAEC)            |
| 105909 | 2352965 | 2351790 TY-2482_chromosome | B7LGA0 | Putative secretion pathway protein, L-type protein                                                  | Escherichia coli (strain 55989 / EAEC)            |
| 66388  | 2353939 | 2352965 TY-2482_chromosome | B7LGA1 | Putative type II secretion protein (GspK-like)                                                      | Escherichia coli (strain 55989 / EAEC)            |
| 95593  | 2354541 | 2353945 TY-2482_chromosome | B7LG98 | Putative uncharacterized protein                                                                    | Escherichia coli (strain 55989 / EAEC)            |
| 88397  | 2354909 | 2354541 TY-2482_chromosome | B7LGA2 | Putative type II secretion protein (GspL-like)                                                      | Escherichia coli (strain 55989 / EAEC)            |
| 81030  | 2355469 | 2354909 TY-2482_chromosome | B7LGA4 | Putative uncharacterized protein                                                                    | Escherichia coli (strain 55989 / EAEC)            |
| 61881  | 2355955 | 2355476 TY-2482_chromosome | B7LGA5 | Putative general secretion pathway protein G (EpsG-like)                                            | Escherichia coli (strain 55989 / EAEC)            |
| 29089  | 2357168 | 2355948 TY-2482_chromosome | B7LGA3 | General secretion pathway protein F                                                                 | Escherichia coli (strain 55989 / EAEC)            |
| 59128  | 2358661 | 2357171 TY-2482_chromosome | B7LGA7 | General secretion pathway protein E                                                                 | Escherichia coli (strain 55989 / EAEC)            |
| 25795  | 2360721 | 2358664 TY-2482_chromosome | B7LGA8 | General secretion pathway protein D                                                                 | Escherichia coli (strain 55989 / EAEC)            |
| 76836  | 2361710 | 2360754 TY-2482_chromosome | B7LGA9 | Putative secretion pathway protein, C-type protein                                                  | Escherichia coli (strain 55989 / EAEC)            |
| 88398  | 2362138 | 2361731 TY-2482_chromosome | B7LGA6 | Putative uncharacterized protein yghG                                                               | Escherichia coli (strain 55989 / EAEC)            |
| 99143  | 2363013 | 2362207 TY-2482_chromosome | B7LGB1 | Bifunctional prepilin leader peptidase and methylase                                                | Escherichia coli (strain 55989 / EAEC)            |
| 90197  | 2367784 | 2363156 TY-2482_chromosome | B7LGB2 | Inner membrane lipoprotein                                                                          | Escherichia coli (strain 55989 / EAEC)            |
| 29173  | 2367917 | 2368221 TY-2482_chromosome | A7ZRK1 | Putative uncharacterized protein                                                                    | Escherichia coli O139:H28 (strain E24377A / ETEC) |
| 110401 | 2369934 | 2368255 TY-2482_chromosome | B7LGB4 | Glycolate transporter                                                                               | Escherichia coli (strain 55989 / EAEC)            |
| 84601  | 2372461 | 2370293 TY-2482_chromosome | B7LGB5 | Malate synthase G (EC 2.3.3.9)                                                                      | Escherichia coli (strain 55989 / EAEC)            |
| 89747  | 2372887 | 2372486 TY-2482_chromosome | B7LGB3 | Putative uncharacterized protein glcG                                                               | Escherichia coli (strain 55989 / EAEC)            |
| 59131  | 2374115 | 2372895 TY-2482_chromosome | B7LGB7 | Glycolate oxidase iron-sulfur subunit                                                               | Escherichia coli (strain 55989 / EAEC)            |
| 114054 | 2375178 | 2374129 TY-2482_chromosome | B7LGB8 | Glycolate oxidase FAD binding subunit                                                               | Escherichia coli (strain 55989 / EAEC)            |
| 113271 | 2376677 | 2375181 TY-2482_chromosome | B7LGB9 | Glycolate oxidase subunit, FAD-linked                                                               | Escherichia coli (strain 55989 / EAEC)            |
| 102272 | 2376928 | 2377689 TY-2482_chromosome | C8UFR4 | DNA-binding transcriptional dual regulator, glycolate-binding                                       | Escherichia coli O111:H- (strain 11128 / EHEC)    |
| 111568 | 2378841 | 2377702 TY-2482_chromosome | D3GVN3 | Putative uncharacterized protein                                                                    | Escherichia coli O44:H18 (strain 042 / EAEC)      |
| 60460  | 2379212 | 2380930 TY-2482_chromosome | D3GVN4 | AMP-binding protein                                                                                 | Escherichia coli O44:H18 (strain 042 / EAEC)      |
| 114486 | 2380930 | 2381841 TY-2482_chromosome | C8UFR7 | Conserved predicted protein                                                                         | Escherichia coli O111:H- (strain 11128 / EHEC)    |
| 97111  | 2381876 | 2382121 TY-2482_chromosome | D3GVN6 | Putative acyl carrier protein                                                                       | Escherichia coli O44:H18 (strain 042 / EAEC)      |
| 87055  | 2382124 | 2383293 TY-2482_chromosome | B7LGC4 | Putative 8-amino-7-oxononanoate synthase (EC 2.3.1.47)                                              | Escherichia coli (strain 55989 / EAEC)            |
| 84602  | 2384491 | 2383334 TY-2482_chromosome | B7LGC5 | Putative uncharacterized protein                                                                    | Escherichia coli (strain 55989 / EAEC)            |
| 105107 | 2385477 | 2384410 TY-2482_chromosome | B7LGC0 | Putative uncharacterized protein                                                                    | Escherichia coli (strain 55989 / EAEC)            |
| 106519 | 2386071 | 2385511 TY-2482_chromosome | B7LGC7 | Putative transcriptional regulator                                                                  | Escherichia coli (strain 55989 / EAEC)            |
| 82589  | 2386904 | 2386083 TY-2482_chromosome | B7LGC8 | Putative uncharacterized protein                                                                    | Escherichia coli (strain 55989 / EAEC)            |
| 60565  | 2388253 | 2386907 TY-2482_chromosome | B7LGC9 | Putative membrane protein, conserved protein                                                        | Escherichia coli (strain 55989 / EAEC)            |
| 96959  | 2389057 | 2388302 TY-2482_chromosome | B7LGC6 | Putative uncharacterized protein yghR                                                               | Escherichia coli (strain 55989 / EAEC)            |
| 116072 | 2389802 | 2389092 TY-2482_chromosome | B7LGD1 | Putative uncharacterized protein yghS                                                               | Escherichia coli (strain 55989 / EAEC)            |
| 81031  | 2389976 | 2390665 TY-2482_chromosome | B7LGD0 | Putative uncharacterized protein yghT                                                               | Escherichia coli (strain 55989 / EAEC)            |
| 73723  | 2392216 | 2390720 TY-2482_chromosome | B7LGD2 | Phosphate transporter                                                                               | Escherichia coli (strain 55989 / EAEC)            |
| 78791  | 2394367 | 2392511 TY-2482_chromosome | B7LGD4 | Fused glutathionylspermidine amidase ; glutathionylspermidine synthetase (EC 3.5.1.78) (EC 6.3.1.8) | Escherichia coli (strain 55989 / EAEC)            |
| 64736  | 2394572 | 2395435 TY-2482_chromosome | B7LGD5 | S-transferase (EC 2.5.1.18)                                                                         | Escherichia coli (strain 55989 / EAEC)            |
| 115750 | 2395738 | 2396715 TY-2482_chromosome | B7LGF7 | Transposase, IS110 family                                                                           | Escherichia coli (strain 55989 / EAEC)            |
| 13891  | 2395821 | 2395432 TY-2482_chromosome | D8EBP7 | Putative uncharacterized protein (Fragment)                                                         | Escherichia coli MS 119-7                         |
| 66273  | 2397088 | 2396843 TY-2482_chromosome | B7LGD3 | Hydrogenase 2 accessory protein                                                                     | Escherichia coli (strain 55989 / EAEC)            |
| 112877 | 2397442 | 2397104 TY-2482_chromosome | B7LGD8 | Probable hydrogenase nickel incorporation protein hypA 2                                            | Escherichia coli (strain 55989 / EAEC)            |
| 76445  | 2397923 | 2397438 TY-2482_chromosome | B7LGD9 | Hydrogenase 2-specific chaperone                                                                    | Escherichia coli (strain 55989 / EAEC)            |
| 84584  | 2398410 | 2397919 TY-2482_chromosome | B7LGE0 | Maturation element for hydrogenase 2                                                                | Escherichia coli (strain 55989 / EAEC)            |
| 105096 | 2400113 | 2398413 TY-2482_chromosome | B7LGD7 | Hydrogenase 2, large subunit (EC 1.12.7.2)                                                          | Escherichia coli (strain 55989 / EAEC)            |
| 66365  | 2401288 | 2400113 TY-2482_chromosome | B7LGE2 | Hydrogenase 2 cytochrome b type component                                                           | Escherichia coli (strain 55989 / EAEC)            |

|        |         |                            |                                  |                                                                                                                      |                                                |
|--------|---------|----------------------------|----------------------------------|----------------------------------------------------------------------------------------------------------------------|------------------------------------------------|
| 70016  | 2402264 | 2401281 TY-2482_chromosome | B7LGE3                           | Hydrogenase 2 4Fe-4S ferredoxin-type component                                                                       | Escherichia coli (strain 55989 / EAEC)         |
| 91910  | 2403385 | 2402270 TY-2482_chromosome | B7LGE4                           | Hydrogenase 2, small subunit (EC 1.12.7.2)                                                                           | Escherichia coli (strain 55989 / EAEC)         |
| 104322 | 2403577 | 2403395 TY-2482_chromosome | B7LGE5                           | Putative uncharacterized protein                                                                                     | Escherichia coli (strain 55989 / EAEC)         |
| 93446  | 2403861 | 2403577 TY-2482_chromosome | B7LGE6                           | Putative uncharacterized protein yghW                                                                                | Escherichia coli (strain 55989 / EAEC)         |
| 64575  | 2404906 | 2403983 TY-2482_chromosome | B7LGE7                           | Putative enzyme (EC 3.1.1.45)                                                                                        | Escherichia coli (strain 55989 / EAEC)         |
| 95558  | 2405024 | 2406061 TY-2482_chromosome | B7LGE1                           | Aldo-keto reductase                                                                                                  | Escherichia coli (strain 55989 / EAEC)         |
| 35060  | 2406598 | 2406107 TY-2482_chromosome | B7LGE9                           | UPF0114 protein yqhA                                                                                                 | Escherichia coli (strain 55989 / EAEC)         |
| 95594  | 2406789 | 2407670 TY-2482_chromosome | B7LGF0                           | Putative glutathionylspermidine synthase, with NAD(P)-binding Rossmann-fold domain                                   | Escherichia coli (strain 55989 / EAEC)         |
| 115657 | 2408137 | 2407715 TY-2482_chromosome | B7LGF1                           | Membrane spanning protein in TonB-ExbB-ExbD complex                                                                  | Escherichia coli (strain 55989 / EAEC)         |
| 66274  | 2408878 | 2408147 TY-2482_chromosome | B7LGF2                           | Membrane spanning protein in TonB-ExbB-ExbD complex                                                                  | Escherichia coli (strain 55989 / EAEC)         |
| 95596  | 2409130 | 2410314 TY-2482_chromosome | B7LGF4                           | Cystathionine beta-lyase, PLP-dependent (EC 4.4.1.8)                                                                 | Escherichia coli (strain 55989 / EAEC)         |
| 62770  | 2410457 | 2411113 TY-2482_chromosome | B7LGF5                           | Putative uncharacterized protein yghB                                                                                | Escherichia coli (strain 55989 / EAEC)         |
| 62769  | 2412112 | 2411159 TY-2482_chromosome | B7LGE8                           | Putative DNA-binding transcriptional regulator                                                                       | Escherichia coli (strain 55989 / EAEC)         |
| 61043  | 2412249 | 2413409 TY-2482_chromosome | B7LGF6                           | Alcohol dehydrogenase, NAD(P)-dependent                                                                              | Escherichia coli (strain 55989 / EAEC)         |
| 84585  | 2413517 | 2414341 TY-2482_chromosome | B7LGF8                           | 2,5-diketo-D-gluconate reductase A (EC 1.1.1.274)                                                                    | Escherichia coli (strain 55989 / EAEC)         |
| 84452  | 2414544 | 2415467 TY-2482_chromosome | B7LGF7                           | Putative uncharacterized protein yqhG                                                                                | Escherichia coli (strain 55989 / EAEC)         |
| 97570  | 2415521 | 2415775 TY-2482_chromosome | B7LGG0                           | Putative outer membrane lipoprotein                                                                                  | Escherichia coli (strain 55989 / EAEC)         |
| 79769  | 2418040 | 2415824 TY-2482_chromosome | B7LGG1                           | UPF0313 protein ygiQ                                                                                                 | Escherichia coli (strain 55989 / EAEC)         |
| 95598  | 2419563 | 2418154 TY-2482_chromosome | B7LGF9                           | Repressor protein for FtsI                                                                                           | Escherichia coli (strain 55989 / EAEC)         |
| 77366  | 2420375 | 2419641 TY-2482_chromosome | B7LGG3                           | 1-acyl-sn-glycerol-3-phosphate acyltransferase (EC 2.3.1.51)                                                         | Escherichia coli (strain 55989 / EAEC)         |
| 77416  | 2422866 | 2420611 TY-2482_chromosome | B7LGG5                           | DNA topoisomerase IV, subunit A (EC 5.99.1.-)                                                                        | Escherichia coli (strain 55989 / EAEC)         |
| 74939  | 2422962 | 2423171 TY-2482_chromosome | D3GVS6                           | Putative uncharacterized protein                                                                                     | Escherichia coli O44:H18 (strain 042 / EAEC)   |
| 13886  | 2423412 | 2423197 TY-2482_chromosome | D7YH50                           | Putative uncharacterized protein                                                                                     | Escherichia coli MS 182-1                      |
| 81034  | 2423894 | 2423415 TY-2482_chromosome | B7LGG6                           | Putative transcriptional regulator                                                                                   | Escherichia coli (strain 55989 / EAEC)         |
| 72776  | 2424339 | 2423950 TY-2482_chromosome | B7LGG7                           | Putative uncharacterized protein ygiW                                                                                | Escherichia coli (strain 55989 / EAEC)         |
| 64814  | 2424491 | 2425147 TY-2482_chromosome | B7LGG8                           | DNA-binding response regulator in two-component regulatory system with QseC                                          | Escherichia coli (strain 55989 / EAEC)         |
| 111586 | 2425147 | 2426493 TY-2482_chromosome | B7LGG9                           | Sensory histidine kinase in two-component regulatory system with QseB                                                | Escherichia coli (strain 55989 / EAEC)         |
| 66275  | 2426874 | 2426545 TY-2482_chromosome | B7LGG2                           | Putative uncharacterized protein ygiZ                                                                                | Escherichia coli (strain 55989 / EAEC)         |
| 99144  | 2427193 | 2427771 TY-2482_chromosome | B7LGH1                           | NADPH quinone reductase (EC 1.6.99.6)                                                                                | Escherichia coli (strain 55989 / EAEC)         |
| 110403 | 2427805 | 2428116 TY-2482_chromosome | B7LGH2                           | Quinol monoxygenase                                                                                                  | Escherichia coli (strain 55989 / EAEC)         |
| 81035  | 2430059 | 2428170 TY-2482_chromosome | B7LGH0                           | DNA topoisomerase IV, subunit B (EC 5.99.1.-)                                                                        | Escherichia coli (strain 55989 / EAEC)         |
| 71755  | 2430669 | 2430091 TY-2482_chromosome | B7LGH4                           | Putative esterase                                                                                                    | Escherichia coli (strain 55989 / EAEC)         |
| 90016  | 2431496 | 2430672 TY-2482_chromosome | B7LGH3                           | Cyclic 3',5'-adenosine monophosphate phosphodiesterase (EC 3.1.4.17)                                                 | Escherichia coli (strain 55989 / EAEC)         |
| 62773  | 2431943 | 2431524 TY-2482_chromosome | B7LGH6                           | Putative dehydrogenase                                                                                               | Escherichia coli (strain 55989 / EAEC)         |
| 69342  | 2432573 | 2431947 TY-2482_chromosome | B7LGH7                           | ADP-ribose pyrophosphatase (EC 3.6.1.13)                                                                             | Escherichia coli (strain 55989 / EAEC)         |
| 62772  | 2432778 | 2434256 TY-2482_chromosome | B7LGH5                           | Transport channel                                                                                                    | Escherichia coli (strain 55989 / EAEC)         |
| 116161 | 2434407 | 2435075 TY-2482_chromosome | C8TWX3                           | UPF0441 protein ygiB                                                                                                 | Escherichia coli O103:H2 (strain 12009 / EHEC) |
| 95315  | 2435084 | 2436241 TY-2482_chromosome | B7LGI0                           | Putative enzyme                                                                                                      | Escherichia coli (strain 55989 / EAEC)         |
| 59132  | 2437097 | 2436285 TY-2482_chromosome | B7LGH8                           | Putative dioxygenase                                                                                                 | Escherichia coli (strain 55989 / EAEC)         |
| 35109  | 2437213 | 2437983 TY-2482_chromosome | B7LGI2                           | Zinc transporter ZupT                                                                                                | Escherichia coli (strain 55989 / EAEC)         |
| 66276  | 2438238 | 2438047 TY-2482_chromosome | B7LGI3                           | Putative uncharacterized protein                                                                                     | Escherichia coli (strain 55989 / EAEC)         |
| 33401  | 2439128 | 2438478 TY-2482_chromosome | B7LGI1                           | 3,4-dihydroxy-2-butanone 4-phosphate synthase (DHBP synthase) (EC 4.1.99.12)                                         | Escherichia coli (strain 55989 / EAEC)         |
| 96544  | 2439442 | 2439789 TY-2482_chromosome | D3GVV8                           | Putative uncharacterized protein                                                                                     | Escherichia coli O44:H18 (strain 042 / EAEC)   |
| 88399  | 2440075 | 2440623 TY-2482_chromosome | B7LGI6                           | Putative fimbrial-like adhesin protein                                                                               | Escherichia coli (strain 55989 / EAEC)         |
| 107850 | 2440677 | 2443187 TY-2482_chromosome | B7LGI4                           | Outer membrane usher protein                                                                                         | Escherichia coli (strain 55989 / EAEC)         |
| 84604  | 2443206 | 2443952 TY-2482_chromosome | B7LGY1                           | Periplasmic pilin chaperone                                                                                          | Escherichia coli (strain 55989 / EAEC)         |
| 70059  | 2443957 | 2445018 TY-2482_chromosome | B7LGY2                           | Putative uncharacterized protein yqil                                                                                | Escherichia coli (strain 55989 / EAEC)         |
| 31122  | 2445264 | 2445067 TY-2482_chromosome | B7LGY3                           | Glycogen synthesis protein glgS                                                                                      | Escherichia coli (strain 55989 / EAEC)         |
| 84611  | 2445533 | 2446159 TY-2482_chromosome | B7LGY5                           | Putative uncharacterized protein yqil                                                                                | Escherichia coli (strain 55989 / EAEC)         |
| 67743  | 2446189 | 2447847 TY-2482_chromosome | B7LGY6                           | Putative uncharacterized protein yqik                                                                                | Escherichia coli (strain 55989 / EAEC)         |
| 28120  | 2447869 | 2448198 TY-2482_chromosome | D3QRZ7                           | Putative uncharacterized protein                                                                                     | Escherichia coli O55:H7 (strain CB9615 / EPEC) |
| 28119  | 2448185 | 2448574 TY-2482_chromosome | D3QRZ7                           | Putative uncharacterized protein                                                                                     | Escherichia coli O55:H7 (strain CB9615 / EPEC) |
| r113   | 2448223 | 2448074 TY-2482_chromosome | ref NC_010473 :3290518-3290667 - | [gene=rygD] [locus_tag=ECDH10B_3226]                                                                                 |                                                |
| r114   | 2448599 | 2448451 TY-2482_chromosome | ref NC_010473 :3290518-3290667 - | [gene=rygD] [locus_tag=ECDH10B_3226]                                                                                 |                                                |
| 31413  | 2450077 | 2448647 TY-2482_chromosome | B7LGY7                           | Bifunctional protein hldE [Includes: D-beta-D-heptose 7-phosphate kinase (EC 2.7.1.-) (D-beta-D-heptose 7-phosphotr  | Escherichia coli (strain 55989 / EAEC)         |
| 64406  | 2452965 | 2450128 TY-2482_chromosome | B7LGY4                           | Glutamate-ammonia-ligase adenyllyltransferase (EC 2.7.7.42) (Glutamine-synthase adenyllyltransferase) ([Glutamate-   | Escherichia coli (strain 55989 / EAEC)         |
| 87776  | 2454289 | 2452991 TY-2482_chromosome | B7LGY8                           | Putative adenylate cyclase                                                                                           | Escherichia coli (strain 55989 / EAEC)         |
| 68711  | 2454531 | 2455148 TY-2482_chromosome | B7LGG0                           | Putative signal transduction protein (SH3 domain)                                                                    | Escherichia coli (strain 55989 / EAEC)         |
| 20613  | 2454537 | 2454298 TY-2482_chromosome | D8E4T8                           | Putative uncharacterized protein                                                                                     | Escherichia coli IMS 119-7                     |
| 30255  | 2455215 | 2456450 TY-2482_chromosome | B7LGG2                           | Multifunctional CCA protein [Includes: CCA-adding enzyme (EC 2.7.7.72) (CCA tRNA nucleotidyltransferase) (tRNA C     | Escherichia coli (strain 55989 / EAEC)         |
| 34514  | 2457437 | 2456619 TY-2482_chromosome | B7LGG1                           | Undecaprenyl-diphosphatase (EC 3.6.1.27) (Bacitracin resistance protein) (Undecaprenyl pyrophosphate phosphatase     | Escherichia coli (strain 55989 / EAEC)         |
| 69186  | 2457896 | 2457531 TY-2482_chromosome | B7LGG4                           | Bifunctional dihydroneopterin aldolase ; dihydroneopterin triphosphate 2'-epimerase (EC 4.1.2.25                     | Escherichia coli (strain 55989 / EAEC)         |
| 33018  | 2458001 | 2458615 TY-2482_chromosome | B7LGG5                           | Glycerol-3-phosphate acyltransferase (G3P acyltransferase) (GPAT) (EC 2.3.1.15) (EC 2.3.1.n5) (Lysophosphatidic acid | Escherichia coli (strain 55989 / EAEC)         |
| 57951  | 2459563 | 2458634 TY-2482_chromosome | B7LGG3                           | Putative DNA-binding transcriptional regulator                                                                       | Escherichia coli (strain 55989 / EAEC)         |

|        |         |                            |               |                                                                                                                       |                                              |
|--------|---------|----------------------------|---------------|-----------------------------------------------------------------------------------------------------------------------|----------------------------------------------|
| 87362  | 2459770 | 2460678 TY-2482_chromosome | B7LG27        | L-tartrate dehydratase, alpha subunit (EC 4.2.1.32)                                                                   | Escherichia coli (strain 55989 / EAEC)       |
| 83550  | 2460678 | 2461280 TY-2482_chromosome | B7LG28        | L-tartrate dehydratase, beta subunit (EC 4.2.1.32)                                                                    | Escherichia coli (strain 55989 / EAEC)       |
| 69231  | 2461332 | 2462792 TY-2482_chromosome | B7LG26        | Putative tartrate:succinate antiporter                                                                                | Escherichia coli (strain 55989 / EAEC)       |
| 31089  | 2463851 | 2462841 TY-2482_chromosome | B7LG29        | Probable tRNA threonylcarbamoyladenine biosynthesis protein Gcp (t(6)A37 threonylcarbamoyladenine biosynt             | Escherichia coli (strain 55989 / EAEC)       |
| 33740  | 2464088 | 2464300 TY-2482_chromosome | B7LH01        | 30S ribosomal protein S21                                                                                             | Escherichia coli (strain 55989 / EAEC)       |
| 27812  | 2464146 | 2463863 TY-2482_chromosome | Q1R6R6        | Putative uncharacterized protein                                                                                      | Escherichia coli (strain UT189 / UPEC)       |
| 79985  | 2464414 | 2466156 TY-2482_chromosome | B7LH02        | DNA primase (EC 2.7.7.-)                                                                                              | Escherichia coli (strain 55989 / EAEC)       |
| 73759  | 2466354 | 2468192 TY-2482_chromosome | B7LH00        | RNA polymerase sigma factor                                                                                           | Escherichia coli (strain 55989 / EAEC)       |
| 32522  | 2468779 | 2468276 TY-2482_chromosome | B7LH04        | G/U mismatch-specific DNA glycosylase (EC 3.2.2.28) (Double-strand-specific uracil glycosylase) (Mismatch-specific ur | Escherichia coli (strain 55989 / EAEC)       |
| r345   | 2468904 | 2468979 TY-2482_chromosome | ref NC_010473 | :3311365-3311440 l le tRNA  [gene=ileX] [locus_tag=ECDH10B_3244                                                       |                                              |
| 68501  | 2469797 | 2469036 TY-2482_chromosome | B7LH05        | Putative siderophore interacting protein                                                                              | Escherichia coli (strain 55989 / EAEC)       |
| 114091 | 2470074 | 2470694 TY-2482_chromosome | B7LH06        | Putative transcriptional regulator                                                                                    | Escherichia coli (strain 55989 / EAEC)       |
| 114092 | 2472371 | 2470854 TY-2482_chromosome | B7LH07        | Fused signal transducer for aerotaxis sensory component ; methyl accepting chemotaxis component                       | Escherichia coli (strain 55989 / EAEC)       |
| 13204  | 2472647 | 2472850 TY-2482_chromosome | D6JEV2        | Predicted protein                                                                                                     | Escherichia coli B354                        |
| 32866  | 2472789 | 2474165 TY-2482_chromosome | B7LH08        | Putrescine aminotransferase (EC 2.6.1.82) (Putrescine--2-oxoglutaric acid transaminase) (PAT) (PATase)                | Escherichia coli (strain 55989 / EAEC)       |
| 26426  | 2474152 | 2474559 TY-2482_chromosome | A1AFZ4        | Putative uncharacterized protein                                                                                      | Escherichia coli O1:K1 / APEC                |
| 90687  | 2474761 | 2475741 TY-2482_chromosome | B7LH10        | DNA-binding transcriptional repressor                                                                                 | Escherichia coli (strain 55989 / EAEC)       |
| 102837 | 2475928 | 2479017 TY-2482_chromosome | B7LH11        | Cryptic beta-D-galactosidase, alpha subunit (EC 3.2.1.23)                                                             | Escherichia coli (strain 55989 / EAEC)       |
| 80970  | 2479017 | 2479463 TY-2482_chromosome | B7LH12        | Cryptic beta-D-galactosidase, beta subunit                                                                            | Escherichia coli (strain 55989 / EAEC)       |
| 86216  | 2479529 | 2480959 TY-2482_chromosome | B7LH09        | Putative transporter                                                                                                  | Escherichia coli (strain 55989 / EAEC)       |
| 75843  | 2481096 | 2482163 TY-2482_chromosome | B7LH14        | Putative uncharacterized protein ygjJ                                                                                 | Escherichia coli (strain 55989 / EAEC)       |
| 72035  | 2482183 | 2484531 TY-2482_chromosome | B7LH15        | Putative glycosyl hydrolase                                                                                           | Escherichia coli (strain 55989 / EAEC)       |
| 21905  | 2484581 | 2484805 TY-2482_chromosome | D7YDGO        | Conserved domain protein                                                                                              | Escherichia coli MS 182-1                    |
| 70063  | 2484860 | 2486875 TY-2482_chromosome | B7LH13        | 2,4-dienoyl-CoA reductase, NADH and FMN-linked (EC 1.3.1.34)                                                          | Escherichia coli (strain 55989 / EAEC)       |
| 46286  | 2487348 | 2486926 TY-2482_chromosome | E6ARB5        | Toxin-antitoxin system, antitoxin component, Xre family                                                               | Escherichia coli MS 16-3                     |
| 59172  | 2488746 | 2487613 TY-2482_chromosome | B7LH19        | Ribosomal RNA large subunit methyltransferase G (EC 2.1.1.174) (23S rRNA m2G1835 methyltransferase) (rRNA (guar       | Escherichia coli (strain 55989 / EAEC)       |
| 68412  | 2488795 | 2489331 TY-2482_chromosome | D3GWQ3        | Putative uncharacterized protein                                                                                      | Escherichia coli O44:H18 (strain 042 / EAEC) |
| 77367  | 2489411 | 2490091 TY-2482_chromosome | B7LH21        | Putative thioredoxin-like                                                                                             | Escherichia coli (strain 55989 / EAEC)       |
| 59094  | 2490155 | 2491156 TY-2482_chromosome | B7LH22        | Putative NAD(P)-binding dehydrogenase                                                                                 | Escherichia coli (strain 55989 / EAEC)       |
| r105   | 2491236 | 2491423 TY-2482_chromosome | ref NC_010473 | :3334141-3334328 -  [gene=sraf] [locus_tag=ECDH10B_3263                                                               |                                              |
| 75757  | 2491442 | 2492404 TY-2482_chromosome | B7LH23        | Putative uncharacterized protein alk                                                                                  | Escherichia coli (strain 55989 / EAEC)       |
| 61041  | 2492806 | 2494047 TY-2482_chromosome | B7LH24        | Sodium:serine/threonine symporter                                                                                     | Escherichia coli (strain 55989 / EAEC)       |
| 79012  | 2494606 | 2494058 TY-2482_chromosome | B7LH25        | Putative uncharacterized protein ygjV                                                                                 | Escherichia coli (strain 55989 / EAEC)       |
| 88210  | 2496176 | 2494692 TY-2482_chromosome | B7LH26        | Altronate hydrolase (EC 4.2.1.7)                                                                                      | Escherichia coli (strain 55989 / EAEC)       |
| 34549  | 2497603 | 2496194 TY-2482_chromosome | B7LH20        | Uronate isomerase (EC 5.3.1.12) (Glucuronate isomerase) (Uronic isomerase)                                            | Escherichia coli (strain 55989 / EAEC)       |
| 80425  | 2497966 | 2499381 TY-2482_chromosome | B7LH28        | Hexuronate transporter                                                                                                | Escherichia coli (strain 55989 / EAEC)       |
| 68284  | 2500560 | 2499475 TY-2482_chromosome | B7LH29        | Putative uncharacterized protein                                                                                      | Escherichia coli (strain 55989 / EAEC)       |
| 84623  | 2503259 | 2500560 TY-2482_chromosome | B7LH30        | Putative uncharacterized protein                                                                                      | Escherichia coli (strain 55989 / EAEC)       |
| 108498 | 2503833 | 2503336 TY-2482_chromosome | B7LH27        | Putative adhesin major subunit pilin                                                                                  | Escherichia coli (strain 55989 / EAEC)       |
| 91946  | 2504579 | 2503866 TY-2482_chromosome | B7LH32        | Putative fimbrial protein                                                                                             | Escherichia coli (strain 55989 / EAEC)       |
| 98638  | 2504875 | 2505648 TY-2482_chromosome | B7LH33        | DNA-binding transcriptional repressor                                                                                 | Escherichia coli (strain 55989 / EAEC)       |
| 86687  | 2505996 | 2506655 TY-2482_chromosome | B7LH34        | Putative uncharacterized protein yqjA                                                                                 | Escherichia coli (strain 55989 / EAEC)       |
| 62809  | 2506662 | 2507042 TY-2482_chromosome | B7LH35        | Putative uncharacterized protein yqjB                                                                                 | Escherichia coli (strain 55989 / EAEC)       |
| 108535 | 2507177 | 2507557 TY-2482_chromosome | D3GWR6        | Putative exported protein                                                                                             | Escherichia coli O44:H18 (strain 042 / EAEC) |
| 99186  | 2507598 | 2507900 TY-2482_chromosome | B7LH37        | Putative uncharacterized protein yqjD                                                                                 | Escherichia coli (strain 55989 / EAEC)       |
| 101574 | 2507906 | 2508307 TY-2482_chromosome | B7LH36        | Putative uncharacterized protein yqjE                                                                                 | Escherichia coli (strain 55989 / EAEC)       |
| 101135 | 2508300 | 2508596 TY-2482_chromosome | B7LH39        | Putative uncharacterized protein yqjK                                                                                 | Escherichia coli (strain 55989 / EAEC)       |
| 78723  | 2508695 | 2509174 TY-2482_chromosome | D3GWS0        | Putative membrane protein                                                                                             | Escherichia coli O44:H18 (strain 042 / EAEC) |
| 60962  | 2509247 | 2510230 TY-2482_chromosome | B7LH38        | S-transferase                                                                                                         | Escherichia coli (strain 55989 / EAEC)       |
| 59089  | 2510526 | 2510888 TY-2482_chromosome | B7LH42        | Putative uncharacterized protein yhaH                                                                                 | Escherichia coli (strain 55989 / EAEC)       |
| 14371  | 2511001 | 2511695 TY-2482_chromosome | E1U309        | Transposase InsA'                                                                                                     | Escherichia coli                             |
| 109981 | 2512638 | 2511745 TY-2482_chromosome | B7LH41        | Putative DNA-binding transcriptional regulator                                                                        | Escherichia coli (strain 55989 / EAEC)       |
| 88440  | 2512743 | 2513441 TY-2482_chromosome | B7LH45        | Putative pirin-related protein                                                                                        | Escherichia coli (strain 55989 / EAEC)       |
| 34941  | 2515002 | 2513695 TY-2482_chromosome | B7LH44        | UPF0597 protein yhaM                                                                                                  | Escherichia coli (strain 55989 / EAEC)       |
| 91779  | 2516298 | 2515033 TY-2482_chromosome | B7LH48        | Putative transporter                                                                                                  | Escherichia coli (strain 55989 / EAEC)       |
| 62810  | 2518000 | 2516639 TY-2482_chromosome | B7LH49        | L-serine dehydratase 3 (EC 4.3.1.17)                                                                                  | Escherichia coli (strain 55989 / EAEC)       |
| 106544 | 2518461 | 2518075 TY-2482_chromosome | B7LH50        | L-PSP (MRNA) endoribonuclease                                                                                         | Escherichia coli (strain 55989 / EAEC)       |
| 73762  | 2520769 | 2518478 TY-2482_chromosome | B7LH51        | Pyruvate formate-lyase 4/2-ketobutyrate formate-lyase (EC 2.3.1.54)                                                   | Escherichia coli (strain 55989 / EAEC)       |
| 102839 | 2522023 | 2520806 TY-2482_chromosome | B7LH47        | Propionate kinase/acetate kinase C, anaerobic (EC 2.7.2.-) (EC 2.7.2.1)                                               | Escherichia coli (strain 55989 / EAEC)       |
| 34213  | 2523368 | 2522040 TY-2482_chromosome | B7LH53        | Threonine/serine transporter TdcC (H+)/(threonine-serine symporter)                                                   | Escherichia coli (strain 55989 / EAEC)       |
| 81068  | 2524379 | 2523393 TY-2482_chromosome | B7LH54        | Catabolic threonine dehydratase, PLP-dependent (EC 4.3.1.19)                                                          | Escherichia coli (strain 55989 / EAEC)       |
| 91300  | 2525416 | 2524481 TY-2482_chromosome | B7LH55        | DNA-binding transcriptional activator                                                                                 | Escherichia coli (strain 55989 / EAEC)       |
| 104629 | 2525593 | 2525946 TY-2482_chromosome | B7LH56        | Threonine dehydratase operon activator protein                                                                        | Escherichia coli (strain 55989 / EAEC)       |
| 111581 | 2526205 | 2526741 TY-2482_chromosome | B7LH52        | Putative uncharacterized protein yhaB                                                                                 | Escherichia coli (strain 55989 / EAEC)       |

|        |         |                            |                                  |                                                                                                                                        |                                              |
|--------|---------|----------------------------|----------------------------------|----------------------------------------------------------------------------------------------------------------------------------------|----------------------------------------------|
| 106474 | 2526766 | 2527950 TY-2482_chromosome | B7LH57                           | Putative uncharacterized protein yhaC                                                                                                  | Escherichia coli (strain 55989 / EAEC)       |
| 115751 | 2528291 | 2529268 TY-2482_chromosome | B7LF78                           | Transposase, IS110 family                                                                                                              | Escherichia coli (strain 55989 / EAEC)       |
| 27818  | 2529684 | 2530211 TY-2482_chromosome | A1AG32                           | Putative uncharacterized protein                                                                                                       | Escherichia coli O1:K1 / APEC                |
| r98    | 2530109 | 2529733 TY-2482_chromosome | ref NC_010473 :3365983-3366359 - | [gene=rrpB] [locus_tag=ECDH10B_3296]                                                                                                   |                                              |
| 105295 | 2531368 | 2530145 TY-2482_chromosome | B7LH60                           | Glycerate kinase I (EC 2.7.1.31)                                                                                                       | Escherichia coli (strain 55989 / EAEC)       |
| 99187  | 2532274 | 2531387 TY-2482_chromosome | B7LH61                           | Tartronate semialdehyde reductase (EC 1.1.1.60)                                                                                        | Escherichia coli (strain 55989 / EAEC)       |
| 31071  | 2533074 | 2532307 TY-2482_chromosome | B7LH62                           | 5-keto-4-deoxy-D-glucarate aldolase (KDGluC aldolase) (KDGluC) (EC 4.1.2.20) (2-dehydro-3-deoxy-D-glucarate aldolase)                  | Escherichia coli (strain 55989 / EAEC)       |
| 88442  | 2534424 | 2533093 TY-2482_chromosome | B7LH59                           | Putative (D)-galactarate transporter                                                                                                   | Escherichia coli (strain 55989 / EAEC)       |
| 106546 | 2534798 | 2536366 TY-2482_chromosome | B7LH63                           | (D)-galactarate dehydrogenase (EC 4.2.1.42)                                                                                            | Escherichia coli (strain 55989 / EAEC)       |
| 38571  | 2536464 | 2536850 TY-2482_chromosome | D7ZZ11                           | Toxin-antitoxin system, antitoxin component, AbrB family                                                                               | Escherichia coli MS 187-1                    |
| 79499  | 2536853 | 2537314 TY-2482_chromosome | B7LH64                           | Putative uncharacterized protein yhaV                                                                                                  | Escherichia coli (strain 55989 / EAEC)       |
| 66304  | 2538181 | 2537375 TY-2482_chromosome | B7LH66                           | DNA-binding transcriptional dual regulator                                                                                             | Escherichia coli (strain 55989 / EAEC)       |
| 31728  | 2538430 | 2539707 TY-2482_chromosome | B7LH67                           | D-tagatose-1,6-bisphosphate aldolase subunit kbaZ                                                                                      | Escherichia coli (strain 55989 / EAEC)       |
| 21379  | 2539697 | 2540203 TY-2482_chromosome | Q9KIQ4                           | AgaV                                                                                                                                   | Escherichia coli                             |
| 88447  | 2540217 | 2540993 TY-2482_chromosome | B7LH70                           | Putative enzyme IIC component of PTS                                                                                                   | Escherichia coli (strain 55989 / EAEC)       |
| 84624  | 2540980 | 2541861 TY-2482_chromosome | B7LH71                           | Putative hexose/hexosamine family PTS permease IID component                                                                           | Escherichia coli (strain 55989 / EAEC)       |
| 91947  | 2541882 | 2542313 TY-2482_chromosome | B7LH68                           | Putative phosphotransferase system enzyme subunit (N-acetyl-galactosamine / galactosamine PTS system enzyme IIB)                       | Escherichia coli (strain 55989 / EAEC)       |
| 61975  | 2542292 | 2543443 TY-2482_chromosome | B7LH73                           | N-acetylglucosamine-6-phosphate deacetylase (GlcNAc 6-P deacetylase) (EC 3.5.1.25)                                                     | Escherichia coli (strain 55989 / EAEC)       |
| 99191  | 2543796 | 2544947 TY-2482_chromosome | B7LH74                           | Tagatose-6-phosphate ketose/aldose isomerase                                                                                           | Escherichia coli (strain 55989 / EAEC)       |
| 31722  | 2544963 | 2545820 TY-2482_chromosome | B7LH72                           | D-tagatose-1,6-bisphosphate aldolase subunit KbaY (TBPA) (TagBP aldolase) (EC 4.1.2.40) (D-tagatose-bisphosphate aldolase)             | Escherichia coli (strain 55989 / EAEC)       |
| 109588 | 2545990 | 2546463 TY-2482_chromosome | B7LH76                           | N-acetylglucosamine-specific enzyme IIB component of PTS (EC 2.7.1.69)                                                                 | Escherichia coli (strain 55989 / EAEC)       |
| 113962 | 2546505 | 2547305 TY-2482_chromosome | B7LH77                           | N-acetylglucosamine-specific enzyme IIC component of PTS (EC 2.7.1.69)                                                                 | Escherichia coli (strain 55989 / EAEC)       |
| 114097 | 2547298 | 2548086 TY-2482_chromosome | B7LH75                           | N-acetylglucosamine-specific enzyme IID component of PTS (EC 2.7.1.69)                                                                 | Escherichia coli (strain 55989 / EAEC)       |
| 110646 | 2548090 | 2548842 TY-2482_chromosome | B7LH79                           | Galactosamine-6-phosphate isomerase                                                                                                    | Escherichia coli (strain 55989 / EAEC)       |
| 60803  | 2549245 | 2549826 TY-2482_chromosome | B7LH78                           | Putative fimbrial-like adhesin protein                                                                                                 | Escherichia coli (strain 55989 / EAEC)       |
| 91950  | 2549909 | 2550601 TY-2482_chromosome | B7LH81                           | Periplasmic pilin chaperone (LpfB-like)                                                                                                | Escherichia coli (strain 55989 / EAEC)       |
| 77461  | 2550634 | 2553147 TY-2482_chromosome | B7LH82                           | Putative outer membrane protein                                                                                                        | Escherichia coli (strain 55989 / EAEC)       |
| 88449  | 2553161 | 2554249 TY-2482_chromosome | B7LH80                           | Putative fimbrial-like adhesin protein (LpfD-like)                                                                                     | Escherichia coli (strain 55989 / EAEC)       |
| 62813  | 2555155 | 2554298 TY-2482_chromosome | B7LH84                           | Ribosomal RNA small subunit methyltransferase I (EC 2.1.1.198) (16S rRNA 2'-O-ribose C1402 methyltransferase) (rRNA methyltransferase) | Escherichia coli (strain 55989 / EAEC)       |
| 97600  | 2555219 | 2557252 TY-2482_chromosome | B7LH85                           | Putative uncharacterized protein yraM                                                                                                  | Escherichia coli (strain 55989 / EAEC)       |
| 35063  | 2557213 | 2557605 TY-2482_chromosome | B7LH86                           | UPF0102 protein yraN                                                                                                                   | Escherichia coli (strain 55989 / EAEC)       |
| 30613  | 2557628 | 2558215 TY-2482_chromosome | B7LH87                           | DnaA initiator-associating protein diaA                                                                                                | Escherichia coli (strain 55989 / EAEC)       |
| 88450  | 2558228 | 2558800 TY-2482_chromosome | B7LH83                           | Putative uncharacterized protein ecfH                                                                                                  | Escherichia coli (strain 55989 / EAEC)       |
| 64127  | 2559957 | 2558920 TY-2482_chromosome | B7LH89                           | Putative permease                                                                                                                      | Escherichia coli (strain 55989 / EAEC)       |
| 94273  | 2560710 | 2560033 TY-2482_chromosome | D3GXP1                           | Putative uncharacterized protein                                                                                                       | Escherichia coli O44:H18 (strain O42 / EAEC) |
| 62814  | 2560793 | 2561308 TY-2482_chromosome | B7LH91                           | Putative intracellular protease                                                                                                        | Escherichia coli (strain 55989 / EAEC)       |
| 34949  | 2561734 | 2561294 TY-2482_chromosome | B7LH88                           | UPF0306 protein yhbP                                                                                                                   | Escherichia coli (strain 55989 / EAEC)       |
| 34952  | 2561785 | 2562084 TY-2482_chromosome | B7LH93                           | UPF0213 protein yhbQ                                                                                                                   | Escherichia coli (strain 55989 / EAEC)       |
| 84627  | 2562577 | 2562077 TY-2482_chromosome | B7LH94                           | Putative acyltransferase with acyl-CoA N-acyltransferase domain                                                                        | Escherichia coli (strain 55989 / EAEC)       |
| 91839  | 2563095 | 2562574 TY-2482_chromosome | B7LH95                           | Putative lipid carrier protein                                                                                                         | Escherichia coli (strain 55989 / EAEC)       |
| 113403 | 2563304 | 2564296 TY-2482_chromosome | B7LH96                           | Peptidase (Collagenase-like)                                                                                                           | Escherichia coli (strain 55989 / EAEC)       |
| 82580  | 2564290 | 2565183 TY-2482_chromosome | D3GXP8                           | Putative peptidase                                                                                                                     | Escherichia coli O44:H18 (strain O42 / EAEC) |
| 61761  | 2565392 | 2566396 TY-2482_chromosome | B7LH98                           | Putative enzyme                                                                                                                        | Escherichia coli (strain 55989 / EAEC)       |
| 112779 | 2567761 | 2566520 TY-2482_chromosome | B7LH97                           | Tryptophan transporter of high affinity                                                                                                | Escherichia coli (strain 55989 / EAEC)       |
| 101202 | 2569804 | 2567918 TY-2482_chromosome | B7LHA0                           | ATP-dependent RNA helicase                                                                                                             | Escherichia coli (strain 55989 / EAEC)       |
| 88305  | 2570868 | 2569987 TY-2482_chromosome | B7LHA1                           | Lipoprotein                                                                                                                            | Escherichia coli (strain 55989 / EAEC)       |
| 33026  | 2573112 | 2570980 TY-2482_chromosome | B7LH99                           | Polyribonucleotide nucleotidyltransferase (EC 2.7.7.8) (Polynucleotide phosphorylase) (PNPase)                                         | Escherichia coli (strain 55989 / EAEC)       |
| r108   | 2573169 | 2573342 TY-2482_chromosome | ref NC_010473 :3406992-3407165 - | [gene=sraG] [locus_tag=ECDH10B_3338]                                                                                                   |                                              |
| 37316  | 2573628 | 2573362 TY-2482_chromosome | B7LG17                           | 30S ribosomal protein S15                                                                                                              | Escherichia coli (strain 55989 / EAEC)       |
| 77505  | 2574721 | 2573780 TY-2482_chromosome | B7LHN1                           | tRNA pseudouridine synthase B (EC 5.4.99.-) (tRNA pseudouridylate synthase) (tRNA pseudouridylate synthase)                            | Escherichia coli (strain 55989 / EAEC)       |
| 83488  | 2575149 | 2574724 TY-2482_chromosome | D3GXQ8                           | Ribosome-binding factor A                                                                                                              | Escherichia coli O44:H18 (strain O42 / EAEC) |
| 31591  | 2577958 | 2575289 TY-2482_chromosome | B7LHN3                           | Translation initiation factor IF-2                                                                                                     | Escherichia coli (strain 55989 / EAEC)       |
| 77504  | 2579470 | 2577986 TY-2482_chromosome | B7LHNO                           | Transcription termination/antitermination L factor                                                                                     | Escherichia coli (strain 55989 / EAEC)       |
| 27213  | 2580076 | 2579501 TY-2482_chromosome | E6WIP2                           | Ribosome maturation factor rimP                                                                                                        | Pantoea sp. (strain At-9b)                   |
| r260   | 2580233 | 2580157 TY-2482_chromosome | ref NC_010473 :3039499-3039575   | [gene=metV] [locus_tag=ECDH10B_2986]                                                                                                   |                                              |
| 29942  | 2580581 | 2581921 TY-2482_chromosome | B7LHN6                           | Argininosuccinate synthase (EC 6.3.4.5) (Citrulline--aspartate ligase)                                                                 | Escherichia coli (strain 55989 / EAEC)       |
| 97070  | 2583557 | 2581935 TY-2482_chromosome | B7LHN7                           | Putative hydrolase, inner membrane                                                                                                     | Escherichia coli (strain 55989 / EAEC)       |
| 93158  | 2583951 | 2583730 TY-2482_chromosome | D3GXR4                           | Putative uncharacterized protein                                                                                                       | Escherichia coli O44:H18 (strain O42 / EAEC) |
| r224   | 2584100 | 2584014 TY-2482_chromosome | ref NC_010473 :3417839-3417925   | [Leu tRNA] [gene=leuU] [locus_tag=ECDH10B_3348]                                                                                        |                                              |
| 58035  | 2584447 | 2584118 TY-2482_chromosome | B7LHN4                           | Preprotein translocase membrane subunit                                                                                                | Escherichia coli (strain 55989 / EAEC)       |
| 31132  | 2586012 | 2584678 TY-2482_chromosome | B7LHN9                           | Phosphoglucosamine mutase (EC 5.4.2.10)                                                                                                | Escherichia coli (strain 55989 / EAEC)       |
| 93378  | 2586853 | 2586008 TY-2482_chromosome | B7LHN8                           | 7,8-dihydropteroate synthase (EC 2.5.1.15)                                                                                             | Escherichia coli (strain 55989 / EAEC)       |
| 114127 | 2588877 | 2586946 TY-2482_chromosome | B7LHP1                           | ATP-dependent zinc metalloprotease FtsH (EC 3.4.24.-)                                                                                  | Escherichia coli (strain 55989 / EAEC)       |
| 33561  | 2589606 | 2588980 TY-2482_chromosome | B7LHP2                           | Ribosomal RNA large subunit methyltransferase E (EC 2.1.1.166) (23S rRNA Um252 methyltransferase) (rRNA (uridin                        | Escherichia coli (strain 55989 / EAEC)       |



|        |         |                            |                                                                        |                                                                                                                          |                                                   |
|--------|---------|----------------------------|------------------------------------------------------------------------|--------------------------------------------------------------------------------------------------------------------------|---------------------------------------------------|
| 29219  | 2589964 | 2589665 TY-2482_chromosome | A1AG83                                                                 | Putative uncharacterized protein                                                                                         | Escherichia coli O1:K1 / APEC                     |
| 102186 | 2590657 | 2590184 TY-2482_chromosome | B7LHP0                                                                 | Transcription elongation factor greA 1 (Transcript cleavage factor greA 1'                                               | Escherichia coli (strain 55989 / EAEC)            |
| 114128 | 2590905 | 2592335 TY-2482_chromosome | B7LHP4                                                                 | D-alanyl-D-alanine carboxypeptidase (EC 3.4.16.4)                                                                        | Escherichia coli (strain 55989 / EAEC)            |
| 32781  | 2593550 | 2592381 TY-2482_chromosome | B7LHP6                                                                 | GTPase obg (GTP-binding protein obg)                                                                                     | Escherichia coli (strain 55989 / EAEC)            |
| 86967  | 2594531 | 2593569 TY-2482_chromosome | B7LHP7                                                                 | Putative uncharacterized protein yhbE                                                                                    | Escherichia coli (strain 55989 / EAEC)            |
| 97396  | 2594885 | 2595451 TY-2482_chromosome | D3GX55                                                                 | Putative uncharacterized protein                                                                                         | Escherichia coli O44:H18 (strain 042 / EAEC)      |
| 33514  | 2594915 | 2594661 TY-2482_chromosome | B7LHP5                                                                 | 50S ribosomal protein L27                                                                                                | Escherichia coli (strain 55989 / EAEC)            |
| 70077  | 2595506 | 2596474 TY-2482_chromosome | B7LHQ0                                                                 | Octaprenyl diphosphate synthase (EC 2.5.1.-)                                                                             | Escherichia coli (strain 55989 / EAEC)            |
| 61466  | 2596705 | 2596980 TY-2482_chromosome | B7LHQ1                                                                 | DNA-binding transcriptional activator of maltose metabolism                                                              | Escherichia coli (strain 55989 / EAEC)            |
| 32535  | 2598290 | 2597034 TY-2482_chromosome | B7LHP8                                                                 | UDP-N-acetylglucosamine 1-carboxyvinyltransferase (EC 2.5.1.7) (Enoylpyruvate transferase) (UDP-N-acetylglucosam         | Escherichia coli (strain 55989 / EAEC)            |
| 25688  | 2598411 | 2598749 TY-2482_chromosome | A7ZS88                                                                 | Putative uncharacterized protein                                                                                         | Escherichia coli O139:H28 (strain E24377A / ETEC) |
| 61290  | 2599052 | 2598762 TY-2482_chromosome | B7LHQ2                                                                 | Putative uncharacterized protein yrbB                                                                                    | Escherichia coli (strain 55989 / EAEC)            |
| 114129 | 2599687 | 2599055 TY-2482_chromosome | B7LHQ5                                                                 | Toluene transporter subunit: membrane component of ABC superfamily                                                       | Escherichia coli (strain 55989 / EAEC)            |
| 88475  | 2600257 | 2599709 TY-2482_chromosome | B7LHQ6                                                                 | Toluene transporter subunit: membrane component of ABC superfamily                                                       | Escherichia coli (strain 55989 / EAEC)            |
| 69402  | 2601044 | 2600265 TY-2482_chromosome | B7LHQ4                                                                 | Toluene transporter subunit: membrane component of ABC superfamily                                                       | Escherichia coli (strain 55989 / EAEC)            |
| 90375  | 2601861 | 2601055 TY-2482_chromosome | B7LHQ8                                                                 | Toluene transporter subunit: ATP-binding component of ABC superfamily                                                    | Escherichia coli (strain 55989 / EAEC)            |
| 65821  | 2602071 | 2603045 TY-2482_chromosome | B7LHQ7                                                                 | Putative calcium/sodium:proton antiporter                                                                                | Escherichia coli (strain 55989 / EAEC)            |
| 114130 | 2603062 | 2604045 TY-2482_chromosome | B7LHR0                                                                 | D-arabinose 5-phosphate isomerase (EC 5.3.1.13)                                                                          | Escherichia coli (strain 55989 / EAEC)            |
| 91778  | 2604069 | 2604632 TY-2482_chromosome | B7LHR1                                                                 | 3-deoxy-D-manno-octulosonate 8-phosphate phosphatase (EC 3.1.3.45)                                                       | Escherichia coli (strain 55989 / EAEC)            |
| 62837  | 2604632 | 2605204 TY-2482_chromosome | B7LHR2                                                                 | Putative uncharacterized protein yrbK                                                                                    | Escherichia coli (strain 55989 / EAEC)            |
| 98980  | 2605176 | 2605730 TY-2482_chromosome | B7LHR3                                                                 | Putative lipopolysaccharide transport protein A: periplasmic-binding component of ABC superfamily                        | Escherichia coli (strain 55989 / EAEC)            |
| 100718 | 2605740 | 2606462 TY-2482_chromosome | B7LHR4                                                                 | Putative lipopolysaccharide transport protein B: ATP-binding component of ABC superfamily                                | Escherichia coli (strain 55989 / EAEC)            |
| 62624  | 2606513 | 2607943 TY-2482_chromosome | B7LHR5                                                                 | RNA polymerase, sigma 54 (Sigma N) factor                                                                                | Escherichia coli (strain 55989 / EAEC)            |
| 84652  | 2607969 | 2608253 TY-2482_chromosome | B7LHR6                                                                 | Ribosome-associated, sigma 54 modulation protein                                                                         | Escherichia coli (strain 55989 / EAEC)            |
| 76277  | 2608374 | 2608862 TY-2482_chromosome | B7LHR7                                                                 | Sugar-specific enzyme IIA component of PTS (EC 2.7.1.69)                                                                 | Escherichia coli (strain 55989 / EAEC)            |
| 34946  | 2608911 | 2609762 TY-2482_chromosome | B7LHQ9                                                                 | UPP0042 nucleotide-binding protein yhbJ                                                                                  | Escherichia coli (strain 55989 / EAEC)            |
| 102953 | 2609762 | 2610031 TY-2482_chromosome | B7LHR9                                                                 | Phosphohistidinoprotein-hexose phosphotransferase component of N-regulated PTS system (Npr'                              | Escherichia coli (strain 55989 / EAEC)            |
| 95374  | 2610247 | 2610876 TY-2482_chromosome | B7LHS0                                                                 | Putative uncharacterized protein yrbL                                                                                    | Escherichia coli (strain 55989 / EAEC)            |
| 32506  | 2611604 | 2610879 TY-2482_chromosome | B7LHS1                                                                 | Monofunctional biosynthetic peptidoglycan transglycosylase (Monofunctional TGase) (EC 2.4.2.-)                           | Escherichia coli (strain 55989 / EAEC)            |
| 110514 | 2612254 | 2611604 TY-2482_chromosome | B7LHR8                                                                 | Isoprenoid biosynthesis protein with amidotransferase-like domain                                                        | Escherichia coli (strain 55989 / EAEC)            |
| r192   | 2612372 | 2612479 TY-2482_chromosome | ref NC_010473 :3446344-3446451 -  [gene=ryhA] [locus_tag=ECDH10B_3384] |                                                                                                                          |                                                   |
| 114136 | 2614820 | 2612487 TY-2482_chromosome | B7LHS3                                                                 | Hybrid sensory histidine kinase in two-component regulatory system with ArcA                                             | Escherichia coli (strain 55989 / EAEC)            |
| 66323  | 2615845 | 2614919 TY-2482_chromosome | B7LHS4                                                                 | Putative Fe-S oxidoreductase                                                                                             | Escherichia coli (strain 55989 / EAEC)            |
| 16758  | 2615864 | 2616052 TY-2482_chromosome | D6JFL7                                                                 | Putative uncharacterized protein                                                                                         | Escherichia coli B354                             |
| 84606  | 2616427 | 2620977 TY-2482_chromosome | B7LHS5                                                                 | Glutamate synthase, large subunit (EC 1.4.1.13)                                                                          | Escherichia coli (strain 55989 / EAEC)            |
| 12557  | 2616473 | 2616240 TY-2482_chromosome | D7Z4E7                                                                 | Conserved domain protein                                                                                                 | Escherichia coli MS 45-1                          |
| 80997  | 2620993 | 2622408 TY-2482_chromosome | B7LHS6                                                                 | Glutamate synthase, 4Fe-4S protein, small subunit (EC 1.4.1.13)                                                          | Escherichia coli (strain 55989 / EAEC)            |
| 18579  | 2622595 | 2623071 TY-2482_chromosome | C5W9G1                                                                 | Predicted protein                                                                                                        | Escherichia coli (strain B / BL21)                |
| 98982  | 2623055 | 2623393 TY-2482_chromosome | B7LHS7                                                                 | Putative uncharacterized protein                                                                                         | Escherichia coli (strain 55989 / EAEC)            |
| 70092  | 2623936 | 2623475 TY-2482_chromosome | B7LHS9                                                                 | Putative uncharacterized protein yhcH                                                                                    | Escherichia coli (strain 55989 / EAEC)            |
| 32620  | 2624808 | 2623936 TY-2482_chromosome | B7LHT0                                                                 | N-acetylmannosamine kinase (EC 2.7.1.60) (ManNAc kinase) (N-acetyl-D-mannosamine kinase)                                 | Escherichia coli (strain 55989 / EAEC)            |
| 110517 | 2625494 | 2624808 TY-2482_chromosome | B7LHT1                                                                 | Putative N-acetylmannosamine-6-phosphate 2-epimerase 1 (EC 5.1.3.9) (ManNAc-6-P epimerase 1)                             | Escherichia coli (strain 55989 / EAEC)            |
| 3498   | 2627032 | 2625545 TY-2482_chromosome | B7LHS8                                                                 | Putative sialic acid transporter (Sialic acid permease)                                                                  | Escherichia coli (strain 55989 / EAEC)            |
| 32614  | 2628034 | 2627144 TY-2482_chromosome | B7LHT3                                                                 | N-acetylneuraminase lyase (EC 4.1.3.3) (N-acetylneuraminic acid pyruvate-lyase) (N-acetylneuraminic acid aldolase) (Sial | Escherichia coli (strain 55989 / EAEC)            |
| 32624  | 2628947 | 2628159 TY-2482_chromosome | B7LHT2                                                                 | Transcriptional regulator nanR                                                                                           | Escherichia coli (strain 55989 / EAEC)            |
| 66324  | 2629375 | 2630739 TY-2482_chromosome | B7LHT5                                                                 | Putative transporter                                                                                                     | Escherichia coli (strain 55989 / EAEC)            |
| 90135  | 2631282 | 2630788 TY-2482_chromosome | B7LHT6                                                                 | ClpXP protease specificity-enhancing factor                                                                              | Escherichia coli (strain 55989 / EAEC)            |
| 27256  | 2631868 | 2632074 TY-2482_chromosome | Q0TCN7                                                                 | Putative uncharacterized protein                                                                                         | Escherichia coli O6:K15:H31 (strain 536 / UPEC)   |
| 95375  | 2631926 | 2631291 TY-2482_chromosome | B7LHT4                                                                 | Stringent starvation protein A                                                                                           | Escherichia coli (strain 55989 / EAEC)            |
| 33770  | 2632713 | 2632324 TY-2482_chromosome | B7LHT8                                                                 | 30S ribosomal protein S9                                                                                                 | Escherichia coli (strain 55989 / EAEC)            |
| 33460  | 2633157 | 2632732 TY-2482_chromosome | B7LHT9                                                                 | 50S ribosomal protein L13                                                                                                | Escherichia coli (strain 55989 / EAEC)            |
| 68128  | 2634503 | 2633379 TY-2482_chromosome | B7LHU0                                                                 | Putative uncharacterized protein yhcM                                                                                    | Escherichia coli (strain 55989 / EAEC)            |
| 112086 | 2634697 | 2635092 TY-2482_chromosome | B7LHU1                                                                 | Putative cytochrome d ubiquinol oxidase subunit III (EC 1.10.3.-)                                                        | Escherichia coli (strain 55989 / EAEC)            |
| 83538  | 2635249 | 2636613 TY-2482_chromosome | B7LHU2                                                                 | Serine endoprotease, periplasmic (EC 3.4.21.-)                                                                           | Escherichia coli (strain 55989 / EAEC)            |
| 65164  | 2636706 | 2637770 TY-2482_chromosome | B7LHU3                                                                 | Serine endoprotease, periplasmic (EC 3.4.21.-)                                                                           | Escherichia coli (strain 55989 / EAEC)            |
| 32120  | 2638774 | 2637839 TY-2482_chromosome | B7LHU4                                                                 | Malate dehydrogenase (EC 1.1.1.37)                                                                                       | Escherichia coli (strain 55989 / EAEC)            |
| 29840  | 2639209 | 2639676 TY-2482_chromosome | B7LHT7                                                                 | Arginine repressor                                                                                                       | Escherichia coli (strain 55989 / EAEC)            |
| 98912  | 2639993 | 2640304 TY-2482_chromosome | B5YSW4                                                                 | Protein Ycfr                                                                                                             | Escherichia coli O157:H7 (strain EC4115 / EHEC)   |
| 72280  | 2640635 | 2640366 TY-2482_chromosome | B7LHU7                                                                 | Putative barnase inhibitor                                                                                               | Escherichia coli (strain 55989 / EAEC)            |
| 29632  | 2642694 | 2640730 TY-2482_chromosome | B7LHU8                                                                 | p-hydroxybenzoic acid efflux pump subunit AaeB (pHBA efflux pump protein B                                               | Escherichia coli (strain 55989 / EAEC)            |
| 29624  | 2643632 | 2642703 TY-2482_chromosome | B7LHU9                                                                 | p-hydroxybenzoic acid efflux pump subunit AaeA (pHBA efflux pump protein A)                                              | Escherichia coli (strain 55989 / EAEC)            |
| 78945  | 2643912 | 2643643 TY-2482_chromosome | B5YSW8                                                                 | Protein AaeX                                                                                                             | Escherichia coli O157:H7 (strain EC4115 / EHEC)   |
| 105292 | 2644026 | 2644952 TY-2482_chromosome | B7LHV1                                                                 | DNA-binding transcriptional regulator, efflux system                                                                     | Escherichia coli (strain 55989 / EAEC)            |
| 97069  | 2646528 | 2645086 TY-2482_chromosome | B7LHV2                                                                 | Putative peptidase                                                                                                       | Escherichia coli (strain 55989 / EAEC)            |

|        |         |                            |                                                                                        |                                                                                                                  |                                                  |
|--------|---------|----------------------------|----------------------------------------------------------------------------------------|------------------------------------------------------------------------------------------------------------------|--------------------------------------------------|
| 98442  | 2650484 | 2646687 TY-2482_chromosome | B7LHU5                                                                                 | Putative uncharacterized protein yhdP                                                                            | Escherichia coli (strain 55989 / EAEC)           |
| 93621  | 2652021 | 2650555 TY-2482_chromosome | B7LHV4                                                                                 | Ribonuclease G (EC 3.1.4.-)                                                                                      | Escherichia coli (strain 55989 / EAEC)           |
| 102146 | 2652604 | 2652014 TY-2482_chromosome | B7LHV5                                                                                 | Maf-like protein yceF 2                                                                                          | Escherichia coli (strain 55989 / EAEC)           |
| 62749  | 2653101 | 2652616 TY-2482_chromosome | B7LHV6                                                                                 | Cell wall structural complex MreBCD transmembrane component MreD                                                 | Escherichia coli (strain 55989 / EAEC)           |
| 77383  | 2654204 | 2653104 TY-2482_chromosome | B7LHV8                                                                                 | Cell wall structural complex MreBCD transmembrane component MreC                                                 | Escherichia coli (strain 55989 / EAEC)           |
| 16187  | 2655282 | 2655470 TY-2482_chromosome | D7X6F8                                                                                 | Putative uncharacterized protein                                                                                 | Escherichia coli MS 198-1                        |
| 87233  | 2655313 | 2654273 TY-2482_chromosome | B7LHV9                                                                                 | Cell wall structural complex MreBCD, actin-like component MreE                                                   | Escherichia coli (strain 55989 / EAEC)           |
| 95609  | 2655421 | 2655606 TY-2482_chromosome | B7LHW0                                                                                 | Putative uncharacterized protein                                                                                 | Escherichia coli (strain 55989 / EAEC)           |
| 69105  | 2657558 | 2655621 TY-2482_chromosome | B7LHW1                                                                                 | Inner membrane associated factor modulating specific RNaseE dependent RNA degradation pathways                   | Escherichia coli (strain 55989 / EAEC)           |
| 73735  | 2657710 | 2658681 TY-2482_chromosome | B7LHV3                                                                                 | Putative oxidoreductase, Zn-dependent and NAD(P)-binding                                                         | Escherichia coli (strain 55989 / EAEC)           |
| 60337  | 2658867 | 2659254 TY-2482_chromosome | D3GXL9                                                                                 | Sulfoxide reductase heme-binding subunit yedZ (Flavocytochrome yedZ)                                             | Escherichia coli O44:H18 (strain 042 / EAEC)     |
| 21053  | 2659501 | 2659686 TY-2482_chromosome | Q53295                                                                                 | Orf 5' of BCCP protein (Fragment)                                                                                | Escherichia coli                                 |
| 98584  | 2659662 | 2660129 TY-2482_chromosome | B7LHW3                                                                                 | Acetyl CoA carboxylase, BCCP subunit                                                                             | Escherichia coli (strain 55989 / EAEC)           |
| 69557  | 2660143 | 2661489 TY-2482_chromosome | B7LHW4                                                                                 | Acetyl-CoA carboxylase, biotin carboxylase subunit (EC 6.3.4.14)                                                 | Escherichia coli (strain 55989 / EAEC)           |
| 102912 | 2661601 | 2661840 TY-2482_chromosome | B7LHW5                                                                                 | Putative uncharacterized protein yhdT                                                                            | Escherichia coli (strain 55989 / EAEC)           |
| 59148  | 2661833 | 2663281 TY-2482_chromosome | B7LHW2                                                                                 | Pantothenate:sodium symporter                                                                                    | Escherichia coli (strain 55989 / EAEC)           |
| 33069  | 2663296 | 2664174 TY-2482_chromosome | B7LHW6                                                                                 | Ribosomal protein L11 methyltransferase (L11 Mtase) (EC 2.1.1.-)                                                 | Escherichia coli (strain 55989 / EAEC)           |
| 80317  | 2664506 | 2665468 TY-2482_chromosome | B7LHW7                                                                                 | tRNA-dihydrouridine synthase (EC 1.-.-.-)                                                                        | Escherichia coli (strain 55989 / EAEC)           |
| 30945  | 2665497 | 2665790 TY-2482_chromosome | B7LHW8                                                                                 | DNA-binding protein fis                                                                                          | Escherichia coli (strain 55989 / EAEC)           |
| 97491  | 2665879 | 2666760 TY-2482_chromosome | B7LHW9                                                                                 | Methyltransferase (EC 2.1.1.72)                                                                                  | Escherichia coli (strain 55989 / EAEC)           |
| 62795  | 2667691 | 2667032 TY-2482_chromosome | B7LHX1                                                                                 | DNA-binding transcriptional regulator                                                                            | Escherichia coli (strain 55989 / EAEC)           |
| 71554  | 2668090 | 2669244 TY-2482_chromosome | B7LHX3                                                                                 | Cytoplasmic membrane lipoprotein                                                                                 | Escherichia coli (strain 55989 / EAEC)           |
| 20922  | 2668101 | 2667871 TY-2482_chromosome | D6JFR7                                                                                 | Putative uncharacterized protein                                                                                 | Escherichia coli B354                            |
| 99159  | 2669259 | 2672360 TY-2482_chromosome | B7LHX4                                                                                 | Multidrug efflux system protein                                                                                  | Escherichia coli (strain 55989 / EAEC)           |
| 75543  | 2672616 | 2672834 TY-2482_chromosome | B7LHX2                                                                                 | Putative uncharacterized protein yhdV                                                                            | Escherichia coli (strain 55989 / EAEC)           |
| 95610  | 2673376 | 2674290 TY-2482_chromosome | B7LHX7                                                                                 | Amino-acid transporter subunit ; periplasmic-binding component of ABC superfamily                                | Escherichia coli (strain 55989 / EAEC)           |
| 95562  | 2674361 | 2675539 TY-2482_chromosome | B7LHX8                                                                                 | Amino-acid transporter subunit ; membrane component of ABC superfamily                                           | Escherichia coli (strain 55989 / EAEC)           |
| 90296  | 2675552 | 2676652 TY-2482_chromosome | B7LHX5                                                                                 | Amino-acid transporter subunit ; membrane component of ABC superfamily                                           | Escherichia coli (strain 55989 / EAEC)           |
| 70033  | 2676663 | 2677418 TY-2482_chromosome | B7LHY0                                                                                 | Amino-acid transporter subunit ; ATP-binding component of ABC superfamily                                        | Escherichia coli (strain 55989 / EAEC)           |
| 46800  | 2677629 | 2678106 TY-2482_chromosome | Q8CLX4                                                                                 | Putative uncharacterized protein                                                                                 | Yersinia pestis                                  |
| r141   | 2677769 | 2677650 TY-2482_chromosome | ref NC_010473 :3519190-3519309 5S ribosomal RNA   [gene=rrfB] [locus_tag=ECDH10B_3447  |                                                                                                                  |                                                  |
| r343   | 2677882 | 2677807 TY-2482_chromosome | ref NC_010473 :3519347-3519422 Thr tRNA   [gene=thrV] [locus_tag=ECDH10B_3448          |                                                                                                                  |                                                  |
| r125   | 2678014 | 2677895 TY-2482_chromosome | ref NC_010473 :4043643-4043762 5S ribosomal RNA   [gene=rrfC] [locus_tag=ECDH10B_3948  |                                                                                                                  |                                                  |
| 22418  | 2678333 | 2678689 TY-2482_chromosome | C1HUN0                                                                                 | Prolipoprotein diacylglycerol transferase (Fragment)                                                             | Escherichia sp. 3_2_53FAA                        |
| 20477  | 2678693 | 2679145 TY-2482_chromosome | C1HUN1                                                                                 | Cell wall-associated hydrolase (Fragment)                                                                        | Escherichia sp. 3_2_53FAA                        |
| 13801  | 2679222 | 2679425 TY-2482_chromosome | C1HUN3                                                                                 | Putative uncharacterized protein                                                                                 | Escherichia sp. 3_2_53FAA                        |
| 24099  | 2680483 | 2680785 TY-2482_chromosome | Q1R3T8                                                                                 | Putative uncharacterized protein                                                                                 | Escherichia coli (strain UT189 / UPEC)           |
| r0     | 2681011 | 2678108 TY-2482_chromosome | ref NC_010473 :4307762-4310665 23S ribosomal RNA   [gene=rrlE] [locus_tag=ECDH10B_4198 |                                                                                                                  |                                                  |
| r319   | 2681280 | 2681205 TY-2482_chromosome | ref NC_010473 :4307493-4307568 Glu tRNA   [gene=gltV] [locus_tag=ECDH10B_4197          |                                                                                                                  |                                                  |
| 25824  | 2681786 | 2681469 TY-2482_chromosome | Q57H85                                                                                 | ORF16-lacZ fusion protein                                                                                        | Salmonella choleraesuis                          |
| 11307  | 2682761 | 2682994 TY-2482_chromosome | E9WNY3                                                                                 | Putative uncharacterized protein                                                                                 | Escherichia coli E1520                           |
| r49    | 2682907 | 2681366 TY-2482_chromosome | ref NC_010473 :3522988-3524529 16S ribosomal RNA   [gene=rrsD] [locus_tag=ECDH10B_3453 |                                                                                                                  |                                                  |
| 63605  | 2683088 | 2683930 TY-2482_chromosome | C6UV66                                                                                 | Conserved protein                                                                                                | Escherichia coli O157:H7 (strain TW14359 / EHEC) |
| 59149  | 2684166 | 2683912 TY-2482_chromosome | B7LHY2                                                                                 | Putative uncharacterized protein yrdB                                                                            | Escherichia coli (strain 55989 / EAEC)           |
| 29908  | 2684981 | 2684166 TY-2482_chromosome | B7LHX9                                                                                 | Shikimate dehydrogenase (EC 1.1.1.25)                                                                            | Escherichia coli (strain 55989 / EAEC)           |
| 71941  | 2685558 | 2684989 TY-2482_chromosome | B7LHY4                                                                                 | Putative ribosome maturation factor                                                                              | Escherichia coli (strain 55989 / EAEC)           |
| 71642  | 2686105 | 2685566 TY-2482_chromosome | B7LHY5                                                                                 | Putative DNA topoisomerase                                                                                       | Escherichia coli (strain 55989 / EAEC)           |
| 33960  | 2686607 | 2686137 TY-2482_chromosome | B7LHY6                                                                                 | Protein smg                                                                                                      | Escherichia coli (strain 55989 / EAEC)           |
| 114070 | 2687703 | 2686582 TY-2482_chromosome | B7LHY7                                                                                 | Putative uncharacterized protein smf                                                                             | Escherichia coli (strain 55989 / EAEC)           |
| 30583  | 2687833 | 2688339 TY-2482_chromosome | B7LHY3                                                                                 | Peptide deformylase (PDF) (EC 3.5.1.88) (Polypeptide deformylase)                                                | Escherichia coli (strain 55989 / EAEC)           |
| 30995  | 2688357 | 2689301 TY-2482_chromosome | B7LHY8                                                                                 | Methionyl-tRNA formyltransferase (EC 2.1.2.9)                                                                    | Escherichia coli (strain 55989 / EAEC)           |
| 33788  | 2689350 | 2690636 TY-2482_chromosome | B7LHZ0                                                                                 | Ribosomal RNA small subunit methyltransferase B (EC 2.1.1.176) (16S rRNA m5C967 methyltransferase) (rRNA (cytosi | Escherichia coli (strain 55989 / EAEC)           |
| 84598  | 2690661 | 2692034 TY-2482_chromosome | B4LHY9                                                                                 | NAD-binding component of Trk potassium transporter                                                               | Escherichia coli (strain 55989 / EAEC)           |
| 32490  | 2692167 | 2692574 TY-2482_chromosome | B7LHZ2                                                                                 | Large-conductance mechanosensitive channel                                                                       | Escherichia coli (strain 55989 / EAEC)           |
| 66279  | 2692792 | 2692577 TY-2482_chromosome | B7LHZ3                                                                                 | Putative uncharacterized protein yhdL                                                                            | Escherichia coli (strain 55989 / EAEC)           |
| 82984  | 2693273 | 2692851 TY-2482_chromosome | B7LHZ4                                                                                 | DNA-binding transcriptional activator in response to Zn(II)                                                      | Escherichia coli (strain 55989 / EAEC)           |
| 111553 | 2693652 | 2693287 TY-2482_chromosome | B7LHZ1                                                                                 | Putative uncharacterized protein yhdN                                                                            | Escherichia coli (strain 55989 / EAEC)           |
| 33476  | 2694142 | 2693762 TY-2482_chromosome | B7LHZ6                                                                                 | 50S ribosomal protein L17                                                                                        | Escherichia coli (strain 55989 / EAEC)           |
| 73736  | 2695172 | 2694186 TY-2482_chromosome | B7LHZ7                                                                                 | RNA polymerase, alpha subunit (EC 2.7.7.6)                                                                       | Escherichia coli (strain 55989 / EAEC)           |
| 33752  | 2695818 | 2695201 TY-2482_chromosome | B7LHZ8                                                                                 | 30S ribosomal protein S4                                                                                         | Escherichia coli (strain 55989 / EAEC)           |
| 33703  | 2696241 | 2695855 TY-2482_chromosome | B7LHZ9                                                                                 | 30S ribosomal protein S11                                                                                        | Escherichia coli (strain 55989 / EAEC)           |
| 87058  | 2696614 | 2696261 TY-2482_chromosome | B7LHZ5                                                                                 | 30S ribosomal protein S13                                                                                        | Escherichia coli (strain 55989 / EAEC)           |
| 82797  | 2698240 | 2696912 TY-2482_chromosome | B7L101                                                                                 | Preprotein translocase subunit secY                                                                              | Escherichia coli (strain 55989 / EAEC)           |
| 33468  | 2698682 | 2698251 TY-2482_chromosome | B7L102                                                                                 | 50S ribosomal protein L15                                                                                        | Escherichia coli (strain 55989 / EAEC)           |

|        |         |                            |        |                                                                                                                      |                                                                   |
|--------|---------|----------------------------|--------|----------------------------------------------------------------------------------------------------------------------|-------------------------------------------------------------------|
| 24325  | 2698839 | 2699387 TY-2482_chromosome | A8AQJ7 | Putative uncharacterized protein                                                                                     | Citrobacter koseri (strain ATCC BAA-895 / CDC 4225-83 / SGSC4696) |
| 27579  | 2699441 | 2700061 TY-2482_chromosome | Q1R625 | Putative uncharacterized protein                                                                                     | Escherichia coli (strain UTI89 / UPEC)                            |
| 86217  | 2701027 | 2700725 TY-2482_chromosome | B7L4J6 | 30S ribosomal protein S14                                                                                            | Escherichia coli (strain 55989 / EAEC)                            |
| 33543  | 2701581 | 2701045 TY-2482_chromosome | B7L4J7 | 50S ribosomal protein L5                                                                                             | Escherichia coli (strain 55989 / EAEC)                            |
| 24482  | 2701792 | 2702343 TY-2482_chromosome | Q1R618 | Putative uncharacterized protein                                                                                     | Escherichia coli (strain UTI89 / UPEC)                            |
| 33724  | 2702711 | 2702460 TY-2482_chromosome | B7L4K0 | 30S ribosomal protein S17                                                                                            | Escherichia coli (strain 55989 / EAEC)                            |
| 33472  | 2703312 | 2702905 TY-2482_chromosome | B7L4K2 | 50S ribosomal protein L16                                                                                            | Escherichia coli (strain 55989 / EAEC)                            |
| 33748  | 2704026 | 2703328 TY-2482_chromosome | B7L4K3 | 30S ribosomal protein S3                                                                                             | Escherichia coli (strain 55989 / EAEC)                            |
| 26886  | 2704026 | 2704430 TY-2482_chromosome | A8AQL1 | Putative uncharacterized protein                                                                                     | Citrobacter koseri (strain ATCC BAA-895 / CDC 4225-83 / SGSC4696) |
| 24854  | 2704539 | 2705576 TY-2482_chromosome | A7MP11 | Putative uncharacterized protein                                                                                     | Enterobacter sakazakii (strain ATCC BAA-894)                      |
| 24419  | 2706359 | 2707057 TY-2482_chromosome | Q1R603 | Putative uncharacterized protein                                                                                     | Escherichia coli (strain UTI89 / UPEC)                            |
| 33539  | 2706429 | 2705827 TY-2482_chromosome | B7L4K8 | 50S ribosomal protein L4                                                                                             | Escherichia coli (strain 55989 / EAEC)                            |
| 33699  | 2707413 | 2707105 TY-2482_chromosome | B7L4L0 | 30S ribosomal protein S10                                                                                            | Escherichia coli (strain 55989 / EAEC)                            |
| 60618  | 2707792 | 2708256 TY-2482_chromosome | B7L4L2 | Putative bifunctional prepilin peptidase HopD: leader peptidase; methyl transferase (General Secretary Pathway)      | Escherichia coli (strain 55989 / EAEC)                            |
| 106335 | 2708732 | 2708259 TY-2482_chromosome | B7L4L3 | Bacterioferritin                                                                                                     | Escherichia coli (strain 55989 / EAEC)                            |
| 70076  | 2708999 | 2708808 TY-2482_chromosome | B7L4L4 | Bacterioferritin-associated ferredoxin                                                                               | Escherichia coli (strain 55989 / EAEC)                            |
| 114540 | 2710366 | 2709185 TY-2482_chromosome | C6UVB2 | Elongation factor Tu 1 (EF-Tu 1)                                                                                     | Escherichia coli O157:H7 (strain TW14359 / EHEC)                  |
| 30726  | 2712551 | 2710440 TY-2482_chromosome | B7L4L1 | Elongation factor G (EF-G)                                                                                           | Escherichia coli (strain 55989 / EAEC)                            |
| 4881   | 2713118 | 2712582 TY-2482_chromosome | C4ZUJ6 | 30S ribosomal protein S7                                                                                             | Escherichia coli (strain K12 / MC4100 / BW2952)                   |
| 27474  | 2713131 | 2713589 TY-2482_chromosome | A7MKJ1 | Putative uncharacterized protein                                                                                     | Enterobacter sakazakii (strain ATCC BAA-894)                      |
| 34384  | 2714002 | 2713718 TY-2482_chromosome | B7L4L8 | Protein tusB (tRNA 2-thiouridine synthesizing protein B)                                                             | Escherichia coli (strain 55989 / EAEC)                            |
| 34387  | 2714369 | 2714013 TY-2482_chromosome | B7L4L9 | Protein tusC (tRNA 2-thiouridine synthesizing protein C)                                                             | Escherichia coli (strain 55989 / EAEC)                            |
| 34391  | 2714755 | 2714372 TY-2482_chromosome | B7L4M1 | Sulfurtransferase tusD (EC 2.8.1.-) (tRNA 2-thiouridine synthesizing protein D)                                      | Escherichia coli (strain 55989 / EAEC)                            |
| 64746  | 2715477 | 2714758 TY-2482_chromosome | B7L4M2 | Putative DNA-binding transcriptional regulator                                                                       | Escherichia coli (strain 55989 / EAEC)                            |
| 73811  | 2716456 | 2715647 TY-2482_chromosome | B7L4M3 | Peptidyl-prolyl cis-trans isomerase (EC 5.2.1.8)                                                                     | Escherichia coli (strain 55989 / EAEC)                            |
| 33957  | 2716677 | 2716892 TY-2482_chromosome | B7L4M4 | Protein slyX                                                                                                         | Escherichia coli (strain 55989 / EAEC)                            |
| 59192  | 2717534 | 2716947 TY-2482_chromosome | B7L4M0 | Peptidyl-prolyl cis-trans isomerase (EC 5.2.1.8)                                                                     | Escherichia coli (strain 55989 / EAEC)                            |
| 106336 | 2717829 | 2717632 TY-2482_chromosome | B7L4M6 | Putative uncharacterized protein yheV                                                                                | Escherichia coli (strain 55989 / EAEC)                            |
| 31757  | 2719644 | 2717842 TY-2482_chromosome | B7L4M7 | Glutathione-regulated potassium-efflux system protein kefB (K+)/H(+) antiporter (NEM-activatable K+)/H(+) antiporter | Escherichia coli (strain 55989 / EAEC)                            |
| 31781  | 2720198 | 2719647 TY-2482_chromosome | B7L4M8 | Glutathione-regulated potassium-efflux system ancillary protein kefG                                                 | Escherichia coli (strain 55989 / EAEC)                            |
| 104793 | 2720326 | 2722236 TY-2482_chromosome | B7L4M9 | Fused putative transporter subunits of ABC superfamily: ATP-binding components                                       | Escherichia coli (strain 55989 / EAEC)                            |
| 93665  | 2722239 | 2723258 TY-2482_chromosome | B7L4M5 | Putative hydrolase                                                                                                   | Escherichia coli (strain 55989 / EAEC)                            |
| 34956  | 2723255 | 2723470 TY-2482_chromosome | B7L4N1 | UPF0270 protein yheU                                                                                                 | Escherichia coli (strain 55989 / EAEC)                            |
| 62836  | 2723527 | 2724393 TY-2482_chromosome | B7L4N2 | Phosphoribulokinase (EC 2.7.1.19)                                                                                    | Escherichia coli (strain 55989 / EAEC)                            |
| 61319  | 2724855 | 2724454 TY-2482_chromosome | B7L4N3 | Putative uncharacterized protein yhfA                                                                                | Escherichia coli (strain 55989 / EAEC)                            |
| 86271  | 2724935 | 2725147 TY-2482_chromosome | B7L4N4 | Putative uncharacterized protein                                                                                     | Escherichia coli (strain 55989 / EAEC)                            |
| 65285  | 2725157 | 2725786 TY-2482_chromosome | B7L4N0 | DNA-binding transcriptional dual regulator                                                                           | Escherichia coli (strain 55989 / EAEC)                            |
| 65034  | 2725828 | 2727927 TY-2482_chromosome | B7L4N6 | Putative uncharacterized protein yhfK                                                                                | Escherichia coli (strain 55989 / EAEC)                            |
| 88423  | 2729217 | 2728000 TY-2482_chromosome | B7L4N7 | Bifunctional acetylornithine aminotransferase and succinyldiaminopimelate aminotransferase (EC 2.6.1.11) (EC 2.6.1.  | Escherichia coli (strain 55989 / EAEC)                            |
| 83697  | 2729866 | 2729306 TY-2482_chromosome | B7L4N8 | Aminodeoxychorismate synthase, subunit II (EC 2.6.1.85)                                                              | Escherichia coli (strain 55989 / EAEC)                            |
| 93623  | 2730500 | 2729901 TY-2482_chromosome | B7L4N5 | Stationary-phase protein, cell division                                                                              | Escherichia coli (strain 55989 / EAEC)                            |
| 114075 | 2731334 | 2730765 TY-2482_chromosome | B7L4P1 | Peptidyl-prolyl cis-trans isomerase (EC 5.2.1.8)                                                                     | Escherichia coli (strain 55989 / EAEC)                            |
| 34371  | 2731605 | 2732783 TY-2482_chromosome | B7L4N9 | Protein tsgA                                                                                                         | Escherichia coli (strain 55989 / EAEC)                            |
| 109875 | 2733048 | 2735588 TY-2482_chromosome | B7L4P3 | Nitrite reductase, large subunit, NAD(P) H-binding (EC 1.7.1.4)                                                      | Escherichia coli (strain 55989 / EAEC)                            |
| 87370  | 2735588 | 2735911 TY-2482_chromosome | B7L4P4 | Nitrite reductase, NAD(P)H-binding, small subunit (EC 1.7.1.4)                                                       | Escherichia coli (strain 55989 / EAEC)                            |
| 114077 | 2736041 | 2736844 TY-2482_chromosome | B7L4P5 | Nitrite transporter                                                                                                  | Escherichia coli (strain 55989 / EAEC)                            |
| 30507  | 2736866 | 2738236 TY-2482_chromosome | B7L4P2 | Siroheme synthase [Includes: Uroporphyrinogen-III C-methyltransferase (Urogen III methylase) (EC 2.1.1.107) (SUMT    | Escherichia coli (strain 55989 / EAEC)                            |
| 68500  | 2738948 | 2740282 TY-2482_chromosome | B7L4P8 | Putative fructoselysine transporter                                                                                  | Escherichia coli (strain 55989 / EAEC)                            |
| 73748  | 2740306 | 2741325 TY-2482_chromosome | B7L4P9 | Fructoselysine-6-P-deglycase                                                                                         | Escherichia coli (strain 55989 / EAEC)                            |
| 82553  | 2741378 | 2742205 TY-2482_chromosome | B7L4Q0 | Fructoselysine 3-epimerase                                                                                           | Escherichia coli (strain 55989 / EAEC)                            |
| 65163  | 2742205 | 2742987 TY-2482_chromosome | B7L4P6 | Fructoselysine 6-kinase (EC 2.7.1.-)                                                                                 | Escherichia coli (strain 55989 / EAEC)                            |
| 80367  | 2743024 | 2743818 TY-2482_chromosome | B5YTT2 | GntR-family transcriptional regulator FrIR                                                                           | Escherichia coli O157:H7 (strain EC4115 / EHEC)                   |
| 96940  | 2745058 | 2743976 TY-2482_chromosome | B7L4Q3 | Putative uncharacterized protein yhfS                                                                                | Escherichia coli (strain 55989 / EAEC)                            |
| 87925  | 2746374 | 2745073 TY-2482_chromosome | B7L4Q4 | Putative uncharacterized protein yhfT                                                                                | Escherichia coli (strain 55989 / EAEC)                            |
| 106530 | 2746739 | 2746389 TY-2482_chromosome | B7L4Q5 | Putative uncharacterized protein yhfU                                                                                | Escherichia coli (strain 55989 / EAEC)                            |
| 102914 | 2747628 | 2746753 TY-2482_chromosome | B7L4Q1 | Putative hydrolase                                                                                                   | Escherichia coli (strain 55989 / EAEC)                            |
| 93225  | 2748851 | 2747628 TY-2482_chromosome | B7L4Q7 | Putative mutase (EC 5.4.2.7)                                                                                         | Escherichia coli (strain 55989 / EAEC)                            |
| 67742  | 2750014 | 2748854 TY-2482_chromosome | B7L4Q8 | Putative amino acid racemase                                                                                         | Escherichia coli (strain 55989 / EAEC)                            |
| 108420 | 2750460 | 2750101 TY-2482_chromosome | B7L4Q9 | Putative uncharacterized protein yhfY                                                                                | Escherichia coli (strain 55989 / EAEC)                            |
| 71357  | 2751382 | 2750480 TY-2482_chromosome | B7L4Q6 | Putative uncharacterized protein yhfZ                                                                                | Escherichia coli (strain 55989 / EAEC)                            |
| 91938  | 2752655 | 2751654 TY-2482_chromosome | B7L4R1 | Tryptophanyl-tRNA synthetase (EC 6.1.1.2)                                                                            | Escherichia coli (strain 55989 / EAEC)                            |
| 72269  | 2753406 | 2752651 TY-2482_chromosome | B7L4R0 | Phosphoglycolate phosphatase (EC 3.1.3.18)                                                                           | Escherichia coli (strain 55989 / EAEC)                            |
| 113881 | 2754076 | 2753402 TY-2482_chromosome | B7L4R3 | Ribulose-phosphate 3-epimerase (EC 5.1.3.1)                                                                          | Escherichia coli (strain 55989 / EAEC)                            |
| 76594  | 2754930 | 2754097 TY-2482_chromosome | B7L4R4 | DNA adenine methylase (EC 2.1.1.72)                                                                                  | Escherichia coli (strain 55989 / EAEC)                            |

|        |         |                            |                                                                       |                                                                                                                     |                                                 |
|--------|---------|----------------------------|-----------------------------------------------------------------------|---------------------------------------------------------------------------------------------------------------------|-------------------------------------------------|
| 89943  | 2756323 | 2755040 TY-2482_chromosome | B7L4R2                                                                | Putative uncharacterized protein damX                                                                               | Escherichia coli (strain 55989 / EAEC)          |
| 29896  | 2757503 | 2756418 TY-2482_chromosome | B7L4R5                                                                | 3-dehydroquinase synthase (EC 4.2.3.4)                                                                              | Escherichia coli (strain 55989 / EAEC)          |
| 8816   | 2758282 | 2757563 TY-2482_chromosome | C35Q92                                                                | Shikimate kinase I                                                                                                  | Escherichia coli                                |
| 115341 | 2759720 | 2758485 TY-2482_chromosome | B7L4R8                                                                | Fimbrial transporter                                                                                                | Escherichia coli (strain 55989 / EAEC)          |
| 25669  | 2760015 | 2759635 TY-2482_chromosome | D3QTK9                                                                | Putative uncharacterized protein hofP                                                                               | Escherichia coli O55:H7 (strain CB9615 / EPEC)  |
| 25668  | 2760466 | 2760029 TY-2482_chromosome | D3QTK9                                                                | Putative uncharacterized protein hofP                                                                               | Escherichia coli O55:H7 (strain CB9615 / EPEC)  |
| 75847  | 2760989 | 2760453 TY-2482_chromosome | B7L4S1                                                                | Putative fimbrial assembly protein (PIIN-like)                                                                      | Escherichia coli (strain 55989 / EAEC)          |
| 62797  | 2761768 | 2760992 TY-2482_chromosome | B7L4S2                                                                | Putative pilus assembly protein                                                                                     | Escherichia coli (strain 55989 / EAEC)          |
| 71737  | 2761888 | 2764437 TY-2482_chromosome | B7L4S0                                                                | Fused penicillin-binding protein 1a: murein transglycosylase ; murein transpeptidase (EC 2.4.1.-) (EC 3.4.-.-)      | Escherichia coli (strain 55989 / EAEC)          |
| 86188  | 2765168 | 2764611 TY-2482_chromosome | B7L4S4                                                                | ADP-ribose diphosphatase (EC 3.6.1.-)                                                                               | Escherichia coli (strain 55989 / EAEC)          |
| 105240 | 2765488 | 2767620 TY-2482_chromosome | B7L4S5                                                                | Intracellular growth attenuator protein                                                                             | Escherichia coli (strain 55989 / EAEC)          |
| 111367 | 2767643 | 2768353 TY-2482_chromosome | D3GZL7                                                                | Putative hydrolase                                                                                                  | Escherichia coli O44:H18 (strain O42 / EAEC)    |
| 81051  | 2768367 | 2768765 TY-2482_chromosome | B7L4S3                                                                | Ribosome-associated heat shock protein Hsp15                                                                        | Escherichia coli (strain 55989 / EAEC)          |
| 108265 | 2768787 | 2769668 TY-2482_chromosome | B5YTV0                                                                | 33 kDa chaperonin (Heat shock protein 33 homolog)                                                                   | Escherichia coli O157:H7 (strain EC4115 / EHEC) |
| 99117  | 2771530 | 2769809 TY-2482_chromosome | B7L4S9                                                                | Putative uncharacterized protein yhgE                                                                               | Escherichia coli (strain 55989 / EAEC)          |
| 32891  | 2771909 | 2773528 TY-2482_chromosome | B7L4T1                                                                | Phosphoenolpyruvate carboxylase [ATP] (PEP carboxylase) (PEPCK) (EC 4.1.1.49) (Phosphoenolpyruvate carboxy          | Escherichia coli (strain 55989 / EAEC)          |
| 81102  | 2773648 | 2773962 TY-2482_chromosome | B7L4T2                                                                | Putative uncharacterized protein                                                                                    | Escherichia coli (strain 55989 / EAEC)          |
| 62839  | 2774024 | 2774317 TY-2482_chromosome | B7L4T3                                                                | Putative HTH-type transcriptional regulator yiaG                                                                    | Escherichia coli (strain 55989 / EAEC)          |
| 90514  | 2775702 | 2774353 TY-2482_chromosome | B7L4T4                                                                | Sensory histidine kinase in two-component regulatory system with OmpR                                               | Escherichia coli (strain 55989 / EAEC)          |
| 77326  | 2776418 | 2775702 TY-2482_chromosome | B7L4S7                                                                | DNA-binding response regulator in two-component regulatory system with EnvZ                                         | Escherichia coli (strain 55989 / EAEC)          |
| 98586  | 2776646 | 2777119 TY-2482_chromosome | B7L4T6                                                                | Transcription elongation factor greA 2 (Transcript cleavage factor greA 2'                                          | Escherichia coli (strain 55989 / EAEC)          |
| 25510  | 2776693 | 2776511 TY-2482_chromosome | Q1R5M9                                                                | Putative uncharacterized protein                                                                                    | Escherichia coli (strain UT189 / UPEC)          |
| 91763  | 2777219 | 2779537 TY-2482_chromosome | B7L4T7                                                                | Transcriptional accessory protein                                                                                   | Escherichia coli (strain 55989 / EAEC)          |
| 81103  | 2779978 | 2780202 TY-2482_chromosome | B7L4T5                                                                | Ferrous iron transporter, protein A                                                                                 | Escherichia coli (strain 55989 / EAEC)          |
| 95365  | 2780222 | 2782588 TY-2482_chromosome | B7L4T8                                                                | Fused ferrous iron transporter, protein B: GTP-binding protein ; membrane protein                                   | Escherichia coli (strain 55989 / EAEC)          |
| 1669   | 2782591 | 2782824 TY-2482_chromosome | B7L4U0                                                                | Ferrous iron transport protein C                                                                                    | Escherichia coli (strain 55989 / EAEC)          |
| 82497  | 2783030 | 2783905 TY-2482_chromosome | B7L4U1                                                                | Putative transposase                                                                                                | Escherichia coli (strain 55989 / EAEC)          |
| 22887  | 2783057 | 2782833 TY-2482_chromosome | D8BVW7                                                                | Putative uncharacterized protein                                                                                    | Escherichia coli MS 196-1                       |
| 113122 | 2784682 | 2785425 TY-2482_chromosome | B5YTW4                                                                | Protein GntX                                                                                                        | Escherichia coli O157:H7 (strain EC4115 / EHEC) |
| 30144  | 2784707 | 2783940 TY-2482_chromosome | B7L4T9                                                                | Carboxylesterase BioH (EC 3.1.1.1) (Biotin synthesis protein BioH)                                                  | Escherichia coli (strain 55989 / EAEC)          |
| 32652  | 2785487 | 2786059 TY-2482_chromosome | B7L4U4                                                                | Fe/S biogenesis protein nfuA                                                                                        | Escherichia coli (strain 55989 / EAEC)          |
| 90730  | 2786423 | 2787736 TY-2482_chromosome | B7L4U2                                                                | Gluconate transporter, high-affinity GNT I system                                                                   | Escherichia coli (strain 55989 / EAEC)          |
| 58073  | 2789868 | 2787787 TY-2482_chromosome | B7L4U5                                                                | 4-alpha-glucanotransferase (Amylomaltase) (EC 2.4.1.25)                                                             | Escherichia coli (strain 55989 / EAEC)          |
| 94051  | 2792271 | 2789881 TY-2482_chromosome | B7L4U7                                                                | Phosphorylase (EC 2.4.1.1)                                                                                          | Escherichia coli (strain 55989 / EAEC)          |
| 32097  | 2792883 | 2795585 TY-2482_chromosome | B7L4U8                                                                | HTH-type transcriptional regulator malT (ATP-dependent transcriptional activator malT                               | Escherichia coli (strain 55989 / EAEC)          |
| 33812  | 2796647 | 2795634 TY-2482_chromosome | B7L4U9                                                                | RNA 3'-terminal phosphate cyclase (RNA cyclase) (RNA-3'-phosphate cyclase) (EC 6.5.1.4)                             | Escherichia coli (strain 55989 / EAEC)          |
| 110655 | 2797877 | 2796654 TY-2482_chromosome | B7L4U6                                                                | Putative uncharacterized protein rtcB                                                                               | Escherichia coli (strain 55989 / EAEC)          |
| 66314  | 2798066 | 2799661 TY-2482_chromosome | B7L4V1                                                                | Sigma 54-dependent transcriptional regulator of rtcBA expression                                                    | Escherichia coli (strain 55989 / EAEC)          |
| 58044  | 2800404 | 2799649 TY-2482_chromosome | B7L4V2                                                                | DNA-binding transcriptional repressor                                                                               | Escherichia coli (strain 55989 / EAEC)          |
| 31164  | 2801251 | 2800424 TY-2482_chromosome | B7L4V0                                                                | Rhomboid protease glpG (EC 3.4.21.105) (Intramembrane serine protease)                                              | Escherichia coli (strain 55989 / EAEC)          |
| 31160  | 2801622 | 2801299 TY-2482_chromosome | B7L4V4                                                                | Thiosulfate sulfurtransferase glpE (EC 2.8.1.1)                                                                     | Escherichia coli (strain 55989 / EAEC)          |
| 115906 | 2801812 | 2803314 TY-2482_chromosome | B7L4V5                                                                | sn-glycerol-3-phosphate dehydrogenase, aerobic, FAD/NAD(P)-binding (EC 1.1.99.5)                                    | Escherichia coli (strain 55989 / EAEC)          |
| 111523 | 2803974 | 2803372 TY-2482_chromosome | B7L4V6                                                                | Putative uncharacterized protein                                                                                    | Escherichia coli (strain 55989 / EAEC)          |
| 72424  | 2804744 | 2803980 TY-2482_chromosome | B7L4V3                                                                | Putative uncharacterized protein                                                                                    | Escherichia coli (strain 55989 / EAEC)          |
| 82986  | 2805457 | 2804750 TY-2482_chromosome | B7L4V8                                                                | Putative uncharacterized protein                                                                                    | Escherichia coli (strain 55989 / EAEC)          |
| 73823  | 2806990 | 2805476 TY-2482_chromosome | B7L4V9                                                                | Putative uncharacterized protein                                                                                    | Escherichia coli (strain 55989 / EAEC)          |
| 88477  | 2809553 | 2807109 TY-2482_chromosome | B7L4V7                                                                | Phosphorylase (EC 2.4.1.1)                                                                                          | Escherichia coli (strain 55989 / EAEC)          |
| 31112  | 2811005 | 2809575 TY-2482_chromosome | B7L4W1                                                                | Glycogen synthase (EC 2.4.1.21) (Starch [bacterial glycogen] synthase)                                              | Escherichia coli (strain 55989 / EAEC)          |
| 31118  | 2812300 | 2811008 TY-2482_chromosome | B7L4W0                                                                | Glucose-1-phosphate adenylyltransferase (EC 2.7.7.27) (ADP-glucose pyrophosphorylase) (ADPGlc PPase) (ADP-glucosyl  | Escherichia coli (strain 55989 / EAEC)          |
| 31124  | 2814291 | 2812321 TY-2482_chromosome | B7L4W3                                                                | Glycogen debranching enzyme (EC 3.2.1.-) (Glycogen operon protein GlgX)                                             | Escherichia coli (strain 55989 / EAEC)          |
| 77512  | 2816474 | 2814291 TY-2482_chromosome | B7L4W4                                                                | 1,4-alpha-glucan-branching enzyme (EC 2.4.1.18) (1,4-alpha-D-glucan:1,4-alpha-D-glucan 6-glycosyl-transferase) (Gly | Escherichia coli (strain 55989 / EAEC)          |
| 98176  | 2817850 | 2816750 TY-2482_chromosome | B7L4W2                                                                | Aspartate-semialdehyde dehydrogenase (EC 1.2.1.11)                                                                  | Escherichia coli (strain 55989 / EAEC)          |
| 98981  | 2818043 | 2818633 TY-2482_chromosome | B7L4W6                                                                | Putative antibiotic transporter                                                                                     | Escherichia coli (strain 55989 / EAEC)          |
| 105822 | 2820033 | 2818696 TY-2482_chromosome | B7L4W7                                                                | Gluconate transporter, low affinity GNT 1 system                                                                    | Escherichia coli (strain 55989 / EAEC)          |
| 24639  | 2820091 | 2820720 TY-2482_chromosome | Q8FCR0                                                                | Putative uncharacterized protein                                                                                    | Escherichia coli O6                             |
| 95408  | 2821698 | 2820706 TY-2482_chromosome | B7L4W9                                                                | DNA-binding transcriptional repressor                                                                               | Escherichia coli (strain 55989 / EAEC)          |
| 81104  | 2822617 | 2821925 TY-2482_chromosome | B7L4X0                                                                | Putative uncharacterized protein yhhW                                                                               | Escherichia coli (strain 55989 / EAEC)          |
| 112084 | 2823777 | 2822743 TY-2482_chromosome | B7L4X1                                                                | Putative oxidoreductase with NAD(P)-binding Rossmann-fold domain                                                    | Escherichia coli (strain 55989 / EAEC)          |
| r197   | 2823987 | 2823894 TY-2482_chromosome | ref NC_010473 :3676691-3676784 -  [gene=ryhB] [locus_tag=ECDH10B_3614 |                                                                                                                     |                                                 |
| 75220  | 2824109 | 2824594 TY-2482_chromosome | B7L4X2                                                                | Putative acetyltransferase                                                                                          | Escherichia coli (strain 55989 / EAEC)          |
| 115350 | 2824834 | 2826009 TY-2482_chromosome | B7L4W8                                                                | Putative uncharacterized protein yhhZ                                                                               | Escherichia coli (strain 55989 / EAEC)          |
| 60695  | 2826009 | 2826500 TY-2482_chromosome | B7L4X4                                                                | Putative uncharacterized protein yrhA                                                                               | Escherichia coli (strain 55989 / EAEC)          |
| 97697  | 2826953 | 2827234 TY-2482_chromosome | B7L4X6                                                                | Putative uncharacterized protein yrhB                                                                               | Escherichia coli (strain 55989 / EAEC)          |
| 94307  | 2829017 | 2827278 TY-2482_chromosome | B7L4X7                                                                | Gamma-glutamyltranspeptidase (EC 2.3.2.2)                                                                           | Escherichia coli (strain 55989 / EAEC)          |

|        |         |                            |        |                                                                                                                  |                                                       |
|--------|---------|----------------------------|--------|------------------------------------------------------------------------------------------------------------------|-------------------------------------------------------|
| 79471  | 2829137 | 2829574 TY-2482_chromosome | B7L4X3 | Putative uncharacterized protein yhhA                                                                            | Escherichia coli (strain 55989 / EAEC)                |
| 107861 | 2830307 | 2829567 TY-2482_chromosome | B7L5Q2 | Glycerophosphodiester phosphodiesterase, cytosolic (EC 3.1.4.46)                                                 | Escherichia coli (strain 55989 / EAEC)                |
| 79846  | 2831374 | 2830307 TY-2482_chromosome | B7L5Q3 | Glycerol-3-phosphate transporter subunit ; ATP-binding component of ABC superfamily                              | Escherichia coli (strain 55989 / EAEC)                |
| 81113  | 2832221 | 2831379 TY-2482_chromosome | B7L5Q4 | Glycerol-3-phosphate transporter subunit ; membrane component of ABC superfamily                                 | Escherichia coli (strain 55989 / EAEC)                |
| 81114  | 2833105 | 2832221 TY-2482_chromosome | B7L5Q5 | Glycerol-3-phosphate transporter subunit ; membrane component of ABC superfamily                                 | Escherichia coli (strain 55989 / EAEC)                |
| 95390  | 2834519 | 2833206 TY-2482_chromosome | B7L5Q6 | Glycerol-3-phosphate transporter subunit ; periplasmic-binding component of ABC superfamily                      | Escherichia coli (strain 55989 / EAEC)                |
| 88489  | 2835628 | 2834918 TY-2482_chromosome | B7L5Q7 | Leucine/isoleucine/valine transporter subunit ; ATP-binding component of ABC superfamily                         | Escherichia coli (strain 55989 / EAEC)                |
| 66339  | 2836397 | 2835633 TY-2482_chromosome | B7L5Q8 | Leucine/isoleucine/valine transporter subunit ; ATP-binding component of ABC superfamily                         | Escherichia coli (strain 55989 / EAEC)                |
| 72216  | 2837671 | 2836397 TY-2482_chromosome | B7L5Q9 | Leucine/isoleucine/valine transporter subunit ; membrane component of ABC superfamily                            | Escherichia coli (strain 55989 / EAEC)                |
| 59003  | 2838594 | 2837671 TY-2482_chromosome | B7L5Q1 | Leucine/isoleucine/valine transporter subunit ; membrane component of ABC superfamily                            | Escherichia coli (strain 55989 / EAEC)                |
| 13536  | 2839718 | 2838590 TY-2482_chromosome | E9VUM2 | Receptor family protein ligand binding protein                                                                   | Escherichia coli H263                                 |
| 91771  | 2840175 | 2840555 TY-2482_chromosome | B7L5R2 | Putative uncharacterized protein yhhK                                                                            | Escherichia coli (strain 55989 / EAEC)                |
| 66354  | 2841860 | 2840760 TY-2482_chromosome | B7L5R3 | Leucine/isoleucine/valine transporter subunit ; periplasmic-binding component of ABC superfamily                 | Escherichia coli (strain 55989 / EAEC)                |
| 91380  | 2842985 | 2842134 TY-2482_chromosome | B7L5R4 | RNA polymerase sigma factor                                                                                      | Escherichia coli (strain 55989 / EAEC)                |
| 58580  | 2844288 | 2843233 TY-2482_chromosome | B7L5R5 | Transporter subunit: membrane component of ABC superfamily                                                       | Escherichia coli (strain 55989 / EAEC)                |
| 65823  | 2844949 | 2844284 TY-2482_chromosome | B7L5R6 | Transporter subunit: ATP-binding component of ABC superfamily                                                    | Escherichia coli (strain 55989 / EAEC)                |
| 72854  | 2846445 | 2844955 TY-2482_chromosome | B7L5R0 | Putative uncharacterized protein ftsY                                                                            | Escherichia coli (strain 55989 / EAEC)                |
| 73591  | 2846595 | 2847188 TY-2482_chromosome | B7L5R8 | Putative methyltransferase                                                                                       | Escherichia coli (strain 55989 / EAEC)                |
| 64576  | 2847812 | 2847456 TY-2482_chromosome | B7L5R7 | Putative uncharacterized protein yhhM                                                                            | Escherichia coli (strain 55989 / EAEC)                |
| 62609  | 2847953 | 2848576 TY-2482_chromosome | B7L5S0 | Putative uncharacterized protein yhhN                                                                            | Escherichia coli (strain 55989 / EAEC)                |
| 102701 | 2848653 | 2850848 TY-2482_chromosome | B7L5S2 | Zinc, cobalt and lead efflux system (EC 3.6.3.3) (EC 3.6.3.5)                                                    | Escherichia coli (strain 55989 / EAEC)                |
| 29314  | 2850914 | 2851213 TY-2482_chromosome | A1AH06 | Putative uncharacterized protein                                                                                 | Escherichia coli O1:K1 / APEC                         |
| 88490  | 2851419 | 2852081 TY-2482_chromosome | B7L5S4 | Putative uncharacterized protein yhhQ                                                                            | Escherichia coli (strain 55989 / EAEC)                |
| 107907 | 2852115 | 2852711 TY-2482_chromosome | C8TJR1 | Periplasmic protein DcrB                                                                                         | Escherichia coli O26:H11 (strain 11368 / EHEC)        |
| 105312 | 2853935 | 2852721 TY-2482_chromosome | B7L5S6 | UPF0226 membrane protein ECS5989_3881                                                                            | Escherichia coli (strain 55989 / EAEC)                |
| 104972 | 2854067 | 2855113 TY-2482_chromosome | B7L5S3 | Putative uncharacterized protein yhhT                                                                            | Escherichia coli (strain 55989 / EAEC)                |
| 60804  | 2855171 | 2855755 TY-2482_chromosome | B7L5S7 | Holo-(Acyl carrier protein) synthase 2 (EC 2.7.8.7)                                                              | Escherichia coli (strain 55989 / EAEC)                |
| 72844  | 2855869 | 2857440 TY-2482_chromosome | B7L5S8 | Nickel transporter subunit ; periplasmic-binding component of ABC superfamily                                    | Escherichia coli (strain 55989 / EAEC)                |
| 69455  | 2857443 | 2858384 TY-2482_chromosome | B7L5T0 | Nickel transporter subunit ; membrane component of ABC superfamily                                               | Escherichia coli (strain 55989 / EAEC)                |
| 109921 | 2858384 | 2859214 TY-2482_chromosome | B7L5T1 | Nickel transporter subunit ; membrane component of ABC superfamily                                               | Escherichia coli (strain 55989 / EAEC)                |
| 83996  | 2859217 | 2859978 TY-2482_chromosome | B7L5T2 | Nickel transporter subunit ; ATP-binding component of ABC superfamily                                            | Escherichia coli (strain 55989 / EAEC)                |
| 99003  | 2859978 | 2860781 TY-2482_chromosome | B7L5S9 | Nickel transporter subunit ; ATP-binding component of ABC superfamily                                            | Escherichia coli (strain 55989 / EAEC)                |
| 32662  | 2860790 | 2861188 TY-2482_chromosome | B7L5T4 | Nickel-responsive regulator                                                                                      | Escherichia coli (strain 55989 / EAEC)                |
| 81115  | 2861670 | 2861314 TY-2482_chromosome | B7L5T5 | Putative uncharacterized protein                                                                                 | Escherichia coli (strain 55989 / EAEC)                |
| 101408 | 2861942 | 2861670 TY-2482_chromosome | C6UWI3 | Predicted protein                                                                                                | Escherichia coli O157:H7 (strain TW14359 / EHEC)      |
| 79172  | 2863125 | 2862004 TY-2482_chromosome | B7L5T6 | Putative transporter subunit: membrane component of ABC superfamily                                              | Escherichia coli (strain 55989 / EAEC)                |
| 62610  | 2865860 | 2863128 TY-2482_chromosome | B7L5T7 | Fused ribosome-associated ATPase: ATP-binding protein ; ATP-binding protein ; putative membrane protein          | Escherichia coli (strain 55989 / EAEC)                |
| 111554 | 2866924 | 2865860 TY-2482_chromosome | B7L5T3 | Putative HlyD family secretion protein                                                                           | Escherichia coli (strain 55989 / EAEC)                |
| 110441 | 2868911 | 2867293 TY-2482_chromosome | B5YUR9 | Putative uncharacterized protein                                                                                 | Escherichia coli O157:H7 (strain EC4115 / EHEC)       |
| 108836 | 2870815 | 2869176 TY-2482_chromosome | D3H0S6 | Putative uncharacterized protein                                                                                 | Escherichia coli O44:H18 (strain O42 / EAEC)          |
| 59004  | 2871182 | 2872231 TY-2482_chromosome | B7L5U4 | Putative uncharacterized protein yhiM                                                                            | Escherichia coli (strain 55989 / EAEC)                |
| 89973  | 2873361 | 2872897 TY-2482_chromosome | B7L5U5 | Putative uncharacterized protein                                                                                 | Escherichia coli (strain 55989 / EAEC)                |
| 77360  | 2874946 | 2873549 TY-2482_chromosome | B7L5U2 | Putative sensor protein pcoS (EC 2.7.13.3)                                                                       | Escherichia coli (strain 55989 / EAEC)                |
| 113040 | 2875629 | 2874946 TY-2482_chromosome | B7L5U7 | Transcriptional regulatory protein pcoR                                                                          | Escherichia coli (strain 55989 / EAEC)                |
| 95527  | 2876607 | 2875681 TY-2482_chromosome | B7L5U8 | Copper resistance protein D                                                                                      | Escherichia coli (strain 55989 / EAEC)                |
| 113999 | 2876992 | 2876615 TY-2482_chromosome | B7L5U9 | Copper resistance protein C                                                                                      | Escherichia coli (strain 55989 / EAEC)                |
| 99016  | 2877931 | 2877035 TY-2482_chromosome | B7L5V0 | Copper resistance protein B                                                                                      | Escherichia coli (strain 55989 / EAEC)                |
| 91860  | 2879751 | 2877931 TY-2482_chromosome | B7L5V1 | Copper resistance protein A                                                                                      | Escherichia coli (strain 55989 / EAEC)                |
| 115258 | 2879980 | 2880426 TY-2482_chromosome | B7L5U6 | Putative uncharacterized protein                                                                                 | Escherichia coli (strain 55989 / EAEC)                |
| 61648  | 2880718 | 2881452 TY-2482_chromosome | B7L5V2 | Putative peptidase                                                                                               | Escherichia coli (strain 55989 / EAEC)                |
| 28644  | 2881686 | 2881492 TY-2482_chromosome | A4Y217 | Putative uncharacterized protein                                                                                 | Shewanella putrefaciens (strain CN-32 / ATCC BAA-453) |
| 66340  | 2884174 | 2881730 TY-2482_chromosome | B7L5V4 | Putative cation-transporting P-type ATPase                                                                       | Escherichia coli (strain 55989 / EAEC)                |
| 105109 | 2884747 | 2884304 TY-2482_chromosome | B7L5V5 | Putative uncharacterized protein                                                                                 | Escherichia coli (strain 55989 / EAEC)                |
| 72036  | 2887974 | 2884831 TY-2482_chromosome | B7L5V6 | Copper/silver efflux system, membrane component                                                                  | Escherichia coli (strain 55989 / EAEC)                |
| 115310 | 2889277 | 2887988 TY-2482_chromosome | B7L5V7 | Putative membrane fusion protein silB                                                                            | Escherichia coli (strain 55989 / EAEC)                |
| 88491  | 2889744 | 2889394 TY-2482_chromosome | B7L5V3 | Putative uncharacterized protein                                                                                 | Escherichia coli (strain 55989 / EAEC)                |
| 110520 | 2891460 | 2889775 TY-2482_chromosome | B7L5V8 | Putative outer membrane lipoprotein silC                                                                         | Escherichia coli (strain 55989 / EAEC)                |
| 91861  | 2892020 | 2893498 TY-2482_chromosome | B7L5W2 | Putative sensory histidine kinase in two-component regulatory system with SilR, senses silver ions (EC 2.7.13.3) | Escherichia coli (strain 55989 / EAEC)                |
| 29209  | 2893629 | 2894174 TY-2482_chromosome | B7L5W1 | Silver-binding protein SilE                                                                                      | Escherichia coli (strain 55989 / EAEC)                |
| 26999  | 2894325 | 2894672 TY-2482_chromosome | B7L5W0 | Putative uncharacterized protein                                                                                 | Escherichia coli (strain 55989 / EAEC)                |
| 114155 | 2896730 | 2894847 TY-2482_chromosome | B7L5W4 | Putative uncharacterized protein                                                                                 | Escherichia coli (strain 55989 / EAEC)                |
| 66235  | 2897563 | 2897237 TY-2482_chromosome | B7L5W5 | Putative transcriptional regulator                                                                               | Escherichia coli (strain 55989 / EAEC)                |
| 24392  | 2898812 | 2897889 TY-2482_chromosome | B7L5W6 | Putative uncharacterized protein                                                                                 | Escherichia coli (strain 55989 / EAEC)                |
| 26175  | 2900389 | 2898827 TY-2482_chromosome | Q19NI3 | TnsD                                                                                                             | Escherichia coli O1:K1 / APEC                         |

|        |          |                            |                                                                       |                                                                                                         |                                                 |
|--------|----------|----------------------------|-----------------------------------------------------------------------|---------------------------------------------------------------------------------------------------------|-------------------------------------------------|
| 24985  | 2901869  | 2900424 TY-2482_chromosome | B7L5W7                                                                | Tn7-like transposition protein TnsC                                                                     | Escherichia coli (strain 55989 / EAEC)          |
| 25716  | 2903992  | 2901872 TY-2482_chromosome | B7L5X1                                                                | Tn7-like transposition protein TnsB                                                                     | Escherichia coli (strain 55989 / EAEC)          |
| 28472  | 2904821  | 2903982 TY-2482_chromosome | B7L5X0                                                                | Tn7-like transposase TnsA                                                                               | Escherichia coli (strain 55989 / EAEC)          |
| 98121  | 2906166  | 2904967 TY-2482_chromosome | B7L5X3                                                                | Putative oxidoreductase with FAD/NAD(P)-binding domain                                                  | Escherichia coli (strain 55989 / EAEC)          |
| 86968  | 2906398  | 2907894 TY-2482_chromosome | B7L5X2                                                                | Phosphate transporter, low-affinity                                                                     | Escherichia coli (strain 55989 / EAEC)          |
| 34528  | 2908303  | 2907971 TY-2482_chromosome | B7L5X4                                                                | Universal stress protein B                                                                              | Escherichia coli (strain 55989 / EAEC)          |
| 82985  | 2908694  | 2909125 TY-2482_chromosome | B7L5X5                                                                | Universal stress global response regulator                                                              | Escherichia coli (strain 55989 / EAEC)          |
| 90816  | 2909446  | 2910912 TY-2482_chromosome | B7L5X7                                                                | Dipeptide and tripeptide permease B                                                                     | Escherichia coli (strain 55989 / EAEC)          |
| 34962  | 2911716  | 2910967 TY-2482_chromosome | B7L5X8                                                                | UPF0341 protein yhiQ                                                                                    | Escherichia coli (strain 55989 / EAEC)          |
| 28525  | 2913766  | 2911727 TY-2482_chromosome | B7L5X6                                                                | Oligopeptidase A (EC 3.4.24.70)                                                                         | Escherichia coli (strain 55989 / EAEC)          |
| 78948  | 2913969  | 2914808 TY-2482_chromosome | B7L5Y0                                                                | Putative DNA (Exogenous) processing protein                                                             | Escherichia coli (strain 55989 / EAEC)          |
| 58487  | 2914883  | 2916232 TY-2482_chromosome | B7L5Y1                                                                | Glutathione oxidoreductase (EC 1.8.1.7)                                                                 | Escherichia coli (strain 55989 / EAEC)          |
| 98020  | 2917112  | 2917462 TY-2482_chromosome | B7L5Y4                                                                | DNA-binding transcriptional repressor                                                                   | Escherichia coli (strain 55989 / EAEC)          |
| 59005  | 2917519  | 2918805 TY-2482_chromosome | B7L5Y2                                                                | Arsenite/antimonite transporter                                                                         | Escherichia coli (strain 55989 / EAEC)          |
| 102723 | 2918821  | 2919243 TY-2482_chromosome | B7L5Y6                                                                | Arsenate reductase (EC 1.20.4.1)                                                                        | Escherichia coli (strain 55989 / EAEC)          |
| 65830  | 2919676  | 2919383 TY-2482_chromosome | B7L5Y7                                                                | Putative uncharacterized protein                                                                        | Escherichia coli (strain 55989 / EAEC)          |
| 110647 | 2919771  | 2920793 TY-2482_chromosome | B7L5Y5                                                                | Putative membrane protein                                                                               | Escherichia coli (strain 55989 / EAEC)          |
| 76050  | 2921376  | 2922518 TY-2482_chromosome | B7L5Y9                                                                | Putative uncharacterized protein                                                                        | Escherichia coli (strain 55989 / EAEC)          |
| 29286  | 2922680  | 2923408 TY-2482_chromosome | Q0SZF7                                                                | Outer membrane protein induced after carbon starvation                                                  | Shigella flexneri serotype 5b (strain 8401)     |
| 94410  | 2923567  | 2924094 TY-2482_chromosome | B7L5Z1                                                                | Putative DNA-binding transcriptional regulator                                                          | Escherichia coli (strain 55989 / EAEC)          |
| 77110  | 2924798  | 2924142 TY-2482_chromosome | B5YVF1                                                                | Putative Mg <sup>2+</sup> transporter-C (MgtC) family protein                                           | Escherichia coli O157:H7 (strain EC4115 / EHEC) |
| 112343 | 2925188  | 2924853 TY-2482_chromosome | C8TJU6                                                                | Acid-resistance protein HdeB                                                                            | Escherichia coli O26:H11 (strain 11368 / EHEC)  |
| 106360 | 2925624  | 2925295 TY-2482_chromosome | B7L5Z4                                                                | Stress response protein acid-resistance protein                                                         | Escherichia coli (strain 55989 / EAEC)          |
| 66344  | 2925879  | 2926448 TY-2482_chromosome | B7L5Z3                                                                | Acid-resistance membrane protein                                                                        | Escherichia coli (strain 55989 / EAEC)          |
| 114156 | 2927250  | 2927774 TY-2482_chromosome | B7L5Z6                                                                | DNA-binding transcriptional activator                                                                   | Escherichia coli (strain 55989 / EAEC)          |
| 12437  | 2928056  | 2927730 TY-2482_chromosome | D720Y0                                                                | Putative uncharacterized protein                                                                        | Escherichia coli MS 45-1                        |
| 66345  | 2928116  | 2929270 TY-2482_chromosome | B7L5Z7                                                                | Multidrug resistance efflux transporter                                                                 | Escherichia coli (strain 55989 / EAEC)          |
| 95528  | 2929298  | 2932408 TY-2482_chromosome | B7L5Z5                                                                | Multidrug transporter, RpoS-dependent                                                                   | Escherichia coli (strain 55989 / EAEC)          |
| 91144  | 2933502  | 2932777 TY-2482_chromosome | B7L5Z9                                                                | DNA-binding transcriptional activator                                                                   | Escherichia coli (strain 55989 / EAEC)          |
| r194   | 2933748  | 2933852 TY-2482_chromosome | ref NC_010473 :3760632-3760736 -  [gene=gadY] [locus_tag=ECDH10B_3692 |                                                                                                         |                                                 |
| 79986  | 2934694  | 2933873 TY-2482_chromosome | B7L600                                                                | DNA-binding transcriptional dual regulator                                                              | Escherichia coli (strain 55989 / EAEC)          |
| 101131 | 2936464  | 2935067 TY-2482_chromosome | B7L5Z8                                                                | Glutamate decarboxylase A, PLP-dependent (EC 4.1.1.15)                                                  | Escherichia coli (strain 55989 / EAEC)          |
| 81116  | 2938072  | 2936678 TY-2482_chromosome | B7L601                                                                | Cytochrome C peroxidase (Cyp-like) (EC 1.11.1.5)                                                        | Escherichia coli (strain 55989 / EAEC)          |
| 34316  | 2938477  | 2940123 TY-2482_chromosome | B7L603                                                                | Cytoplasmic trehalase (EC 3.2.1.28) (Alpha, alpha-trehalase) (Alpha, alpha-trehalose glucosylhydrolase) | Escherichia coli (strain 55989 / EAEC)          |
| 88236  | 2940779  | 2940180 TY-2482_chromosome | B7L604                                                                | Putative DNA-binding response regulator in two-component regulatory system                              | Escherichia coli (strain 55989 / EAEC)          |
| 88237  | 2941227  | 2942195 TY-2482_chromosome | B7L605                                                                | Putative DNA-binding transcriptional regulator                                                          | Escherichia coli (strain 55989 / EAEC)          |
| 102769 | 2942247  | 2943257 TY-2482_chromosome | B7L606                                                                | Putative uncharacterized protein yhjD                                                                   | Escherichia coli (strain 55989 / EAEC)          |
| 110569 | 29443671 | 2944990 TY-2482_chromosome | B7L607                                                                | Putative transporter                                                                                    | Escherichia coli (strain 55989 / EAEC)          |
| 57187  | 2946387  | 2945230 TY-2482_chromosome | Q8Z283                                                                | Putative membrane protein                                                                               | Salmonella typhi                                |
| 115738 | 2947343  | 2946354 TY-2482_chromosome | B7L602                                                                | Putative outer membrane biogenesis protein                                                              | Escherichia coli (strain 55989 / EAEC)          |
| 95436  | 2948165  | 2947401 TY-2482_chromosome | B7L609                                                                | EAL domain containing protein involved in flagellar function                                            | Escherichia coli (strain 55989 / EAEC)          |
| 75478  | 2948392  | 2948168 TY-2482_chromosome | B5YVH2                                                                | Putative uncharacterized protein                                                                        | Escherichia coli O157:H7 (strain EC4115 / EHEC) |
| 90368  | 2948397  | 2949323 TY-2482_chromosome | B7L608                                                                | Ketodeoxygluconokinase (EC 2.7.1.45)                                                                    | Escherichia coli (strain 55989 / EAEC)          |
| 106414 | 2950918  | 2949425 TY-2482_chromosome | B7L611                                                                | Putative zinc-dependent peptidase                                                                       | Escherichia coli (strain 55989 / EAEC)          |
| 30561  | 2952425  | 2951142 TY-2482_chromosome | B7L612                                                                | C4-dicarboxylate transport protein                                                                      | Escherichia coli (strain 55989 / EAEC)          |
| 73358  | 2954536  | 2952545 TY-2482_chromosome | Q8Z288                                                                | Putative uncharacterized protein STY4188                                                                | Salmonella typhi                                |
| 68625  | 2958151  | 2954681 TY-2482_chromosome | B7L615                                                                | Cellulose synthase subunit                                                                              | Escherichia coli (strain 55989 / EAEC)          |
| 73631  | 2959239  | 2958136 TY-2482_chromosome | B7L614                                                                | Endo-1,4-D-glucanase (EC 3.2.1.4)                                                                       | Escherichia coli (strain 55989 / EAEC)          |
| 84429  | 2961585  | 2959249 TY-2482_chromosome | B7L617                                                                | Regulator of cellulose synthase, cyclic di-GMP binding                                                  | Escherichia coli (strain 55989 / EAEC)          |
| 101719 | 2964214  | 2961599 TY-2482_chromosome | B7L616                                                                | Cellulose synthase, catalytic subunit (EC 2.4.1.12)                                                     | Escherichia coli (strain 55989 / EAEC)          |
| 62230  | 2964963  | 2964214 TY-2482_chromosome | B7L619                                                                | Putative uncharacterized protein                                                                        | Escherichia coli (strain 55989 / EAEC)          |
| 75623  | 2965163  | 2964978 TY-2482_chromosome | B7L620                                                                | Putative uncharacterized protein yhjR                                                                   | Escherichia coli (strain 55989 / EAEC)          |
| 102770 | 2965436  | 2967005 TY-2482_chromosome | B7L621                                                                | Putative protease involved in cellulose biosynthesis                                                    | Escherichia coli (strain 55989 / EAEC)          |
| 110575 | 2967005  | 2967193 TY-2482_chromosome | B7L618                                                                | Putative uncharacterized protein bcsF                                                                   | Escherichia coli (strain 55989 / EAEC)          |
| 102771 | 2967193  | 2968869 TY-2482_chromosome | B7L623                                                                | Putative endoglucanase involved in cellulose biosynthesis                                               | Escherichia coli (strain 55989 / EAEC)          |
| 18062  | 2969031  | 2969423 TY-2482_chromosome | D8E601                                                                | Conserved domain protein                                                                                | Escherichia coli MS 119-7                       |
| 18061  | 2969514  | 2969906 TY-2482_chromosome | D8E601                                                                | Conserved domain protein                                                                                | Escherichia coli MS 119-7                       |
| 18060  | 2969997  | 2970389 TY-2482_chromosome | D8E601                                                                | Conserved domain protein                                                                                | Escherichia coli MS 119-7                       |
| 18063  | 2970485  | 2970811 TY-2482_chromosome | D8E601                                                                | Conserved domain protein                                                                                | Escherichia coli MS 119-7                       |
| 65875  | 2970990  | 2972258 TY-2482_chromosome | B7L627                                                                | Transporter                                                                                             | Escherichia coli (strain 55989 / EAEC)          |
| 113184 | 2973295  | 2972294 TY-2482_chromosome | B7L622                                                                | Dipeptide transporter ; ATP-binding component of ABC superfamily                                        | Escherichia coli (strain 55989 / EAEC)          |
| 69009  | 2974275  | 2973295 TY-2482_chromosome | B7L629                                                                | Dipeptide transporter ; ATP-binding component of ABC superfamily                                        | Escherichia coli (strain 55989 / EAEC)          |
| 75200  | 2975188  | 2974289 TY-2482_chromosome | B7L630                                                                | Dipeptide transporter ; membrane component of ABC superfamily                                           | Escherichia coli (strain 55989 / EAEC)          |
| 22821  | 2976180  | 2976392 TY-2482_chromosome | E9TED3                                                                | Conserved domain protein                                                                                | Escherichia coli MS 117-3                       |

|        |         |                            |                                                                              |                                                                                                                       |                                                |
|--------|---------|----------------------------|------------------------------------------------------------------------------|-----------------------------------------------------------------------------------------------------------------------|------------------------------------------------|
| 95437  | 2976217 | 2975201 TY-2482_chromosome | B7L631                                                                       | Dipeptide transporter; membrane component of ABC superfamily                                                          | Escherichia coli (strain 55989 / EAEC)         |
| 113883 | 2977975 | 2976371 TY-2482_chromosome | B7L632                                                                       | Dipeptide transporter ; periplasmic-binding component of ABC superfamily                                              | Escherichia coli (strain 55989 / EAEC)         |
| r251   | 2978795 | 2978719 TY-2482_chromosome | ref NC_010473 :3804216-3804292 Pro tRNA  [gene=proK] [locus_tag=ECDH10B_3724 |                                                                                                                       |                                                |
| 28861  | 2978836 | 2978330 TY-2482_chromosome | Q1R551                                                                       | Putative uncharacterized protein                                                                                      | Escherichia coli (strain UTI89 / UPEC)         |
| 86690  | 2980578 | 2978890 TY-2482_chromosome | B7L764                                                                       | Putative metal dependent hydrolase                                                                                    | Escherichia coli (strain 55989 / EAEC)         |
| 111836 | 2981355 | 2980834 TY-2482_chromosome | B7L6V8                                                                       | LpfE protein                                                                                                          | Escherichia coli (strain 55989 / EAEC)         |
| 26266  | 2982416 | 2981364 TY-2482_chromosome | B7L6V7                                                                       | LpfD protein                                                                                                          | Escherichia coli (strain 55989 / EAEC)         |
| 116178 | 2984901 | 2982409 TY-2482_chromosome | C8TJ88                                                                       | Predicted outer membrane export usher protein SfmD                                                                    | Escherichia coli O26:H11 (strain 11368 / EHEC) |
| 115989 | 2985668 | 2984985 TY-2482_chromosome | B7L6W1                                                                       | Chaperone protein IpfB                                                                                                | Escherichia coli (strain 55989 / EAEC)         |
| 104326 | 2986276 | 2985755 TY-2482_chromosome | B7L6W2                                                                       | Long polar fimbria protein A                                                                                          | Escherichia coli (strain 55989 / EAEC)         |
| 88209  | 2987847 | 2986603 TY-2482_chromosome | B7L6V9                                                                       | Putative transporter                                                                                                  | Escherichia coli (strain 55989 / EAEC)         |
| 27557  | 2988722 | 2989447 TY-2482_chromosome | A1AH92                                                                       | 3-methyl-adenine DNA glycosylase I, constitutive                                                                      | Escherichia coli O1:K1 / APEC                  |
| 101664 | 2988729 | 2988034 TY-2482_chromosome | B7L6W3                                                                       | Putative uncharacterized protein yhjY                                                                                 | Escherichia coli (strain 55989 / EAEC)         |
| 110562 | 2989447 | 2989884 TY-2482_chromosome | B7L6W6                                                                       | Putative acyltransferase with acyl-CoA N-acyltransferase domain                                                       | Escherichia coli (strain 55989 / EAEC)         |
| 87440  | 2992135 | 2989859 TY-2482_chromosome | B7L6W4                                                                       | Biotin sulfoxide reductase (EC 1.---.---)                                                                             | Escherichia coli (strain 55989 / EAEC)         |
| 59042  | 2992342 | 2992998 TY-2482_chromosome | B7L6W8                                                                       | Putative outer membrane lipoprotein                                                                                   | Escherichia coli (strain 55989 / EAEC)         |
| 31108  | 2993105 | 2994076 TY-2482_chromosome | B7L6W9                                                                       | Glyoxylate/hydroxypyruvate reductase B (EC 1.1.1.79) (EC 1.1.1.81)                                                    | Escherichia coli (strain 55989 / EAEC)         |
| 110563 | 2994839 | 2994132 TY-2482_chromosome | B7L6X0                                                                       | Putative uncharacterized protein yiaF                                                                                 | Escherichia coli (strain 55989 / EAEC)         |
| 106409 | 2995273 | 2995560 TY-2482_chromosome | B7L6W7                                                                       | Putative transcriptional regulator                                                                                    | Escherichia coli (strain 55989 / EAEC)         |
| 25170  | 2996203 | 2995784 TY-2482_chromosome | A1AH99                                                                       | Putative uncharacterized protein                                                                                      | Escherichia coli O1:K1 / APEC                  |
| 83391  | 2996456 | 2996163 TY-2482_chromosome | E8YB84                                                                       | Hok/gef cell toxic protein                                                                                            | Escherichia coli (strain ATCC 55124 / KO11)    |
| 34111  | 2998791 | 2996725 TY-2482_chromosome | B7L6X3                                                                       | Glycyl-tRNA synthetase beta subunit (EC 6.1.1.14) (Glycine--tRNA ligase beta subunit) (GlyRS)                         | Escherichia coli (strain 55989 / EAEC)         |
| 34107  | 2999712 | 2998804 TY-2482_chromosome | B7L6X1                                                                       | Glycyl-tRNA synthetase alpha subunit (EC 6.1.1.14) (Glycine--tRNA ligase alpha subunit) (GlyRS)                       | Escherichia coli (strain 55989 / EAEC)         |
| 110565 | 3000106 | 2999810 TY-2482_chromosome | B7L6X5                                                                       | Putative uncharacterized protein ysaB                                                                                 | Escherichia coli (strain 55989 / EAEC)         |
| 108565 | 3000281 | 3001273 TY-2482_chromosome | B7L6X6                                                                       | Putative uncharacterized protein yiaH                                                                                 | Escherichia coli (strain 55989 / EAEC)         |
| 71944  | 3001755 | 3001321 TY-2482_chromosome | B7L6X4                                                                       | Putative uncharacterized protein yiaA                                                                                 | Escherichia coli (strain 55989 / EAEC)         |
| 71879  | 3002142 | 3001804 TY-2482_chromosome | B7L6X8                                                                       | Putative uncharacterized protein yiaB                                                                                 | Escherichia coli (strain 55989 / EAEC)         |
| 111717 | 3003765 | 3002314 TY-2482_chromosome | B7L6X7                                                                       | Xylulokinase (EC 2.7.1.-) (EC 2.7.1.17)                                                                               | Escherichia coli (strain 55989 / EAEC)         |
| 34615  | 3005207 | 3003840 TY-2482_chromosome | B7L6Y0                                                                       | Xylose isomerase (EC 5.3.1.5)                                                                                         | Escherichia coli (strain 55989 / EAEC)         |
| 73627  | 3005573 | 3006562 TY-2482_chromosome | B7L6Y1                                                                       | D-xylose transporter subunit ; periplasmic-binding component of ABC superfamily                                       | Escherichia coli (strain 55989 / EAEC)         |
| 61657  | 3006643 | 3008181 TY-2482_chromosome | B7L6Y2                                                                       | Fused D-xylose transporter subunits of ABC superfamily: ATP-binding components                                        | Escherichia coli (strain 55989 / EAEC)         |
| 84006  | 3008162 | 3009340 TY-2482_chromosome | B7L6X9                                                                       | D-xylose transporter subunit ; membrane component of ABC superfamily                                                  | Escherichia coli (strain 55989 / EAEC)         |
| 25092  | 3009255 | 3009428 TY-2482_chromosome | B7L6Y4                                                                       | Putative uncharacterized protein                                                                                      | Escherichia coli (strain 55989 / EAEC)         |
| 112822 | 3009421 | 3010596 TY-2482_chromosome | B7L6Y5                                                                       | DNA-binding transcriptional activator, xylose-binding                                                                 | Escherichia coli (strain 55989 / EAEC)         |
| 81129  | 3011619 | 3010798 TY-2482_chromosome | B7L6Y3                                                                       | Putative uncharacterized protein box                                                                                  | Escherichia coli (strain 55989 / EAEC)         |
| 90763  | 3011939 | 3013965 TY-2482_chromosome | B7L6Y6                                                                       | Alpha-amylase (EC 3.2.1.1)                                                                                            | Escherichia coli (strain 55989 / EAEC)         |
| 91792  | 3014146 | 3015396 TY-2482_chromosome | B7L6Y7                                                                       | Valine-pyruvate aminotransferase (EC 2.6.1.66)                                                                        | Escherichia coli (strain 55989 / EAEC)         |
| 81130  | 3016024 | 3015554 TY-2482_chromosome | B7L6Y9                                                                       | Putative hydrogenase, 4Fe-4S ferredoxin-type component                                                                | Escherichia coli (strain 55989 / EAEC)         |
| 102765 | 3016974 | 3016129 TY-2482_chromosome | B7L6Z0                                                                       | DNA-binding transcriptional repressor                                                                                 | Escherichia coli (strain 55989 / EAEC)         |
| 30633  | 3017175 | 3018170 TY-2482_chromosome | B7L6Z1                                                                       | 2,3-diketo-L-gulonate reductase (2,3-DKG reductase) (EC 1.1.1.130) (3-dehydro-L-gulonate 2-dehydrogenase)             | Escherichia coli (strain 55989 / EAEC)         |
| 112772 | 3018185 | 3018649 TY-2482_chromosome | B7L6Y8                                                                       | Putative uncharacterized protein yiaL                                                                                 | Escherichia coli (strain 55989 / EAEC)         |
| 99044  | 3018770 | 3019240 TY-2482_chromosome | B7L6Z3                                                                       | Transporter                                                                                                           | Escherichia coli (strain 55989 / EAEC)         |
| 99045  | 3019246 | 3020520 TY-2482_chromosome | B7L6Z4                                                                       | Transporter                                                                                                           | Escherichia coli (strain 55989 / EAEC)         |
| 72665  | 3020536 | 3021519 TY-2482_chromosome | B7L6Z5                                                                       | Transporter                                                                                                           | Escherichia coli (strain 55989 / EAEC)         |
| 65304  | 3021526 | 3023019 TY-2482_chromosome | B7L6Z2                                                                       | L-xylulose kinase (EC 2.7.1.53)                                                                                       | Escherichia coli (strain 55989 / EAEC)         |
| 88216  | 3023019 | 3023678 TY-2482_chromosome | B7L6Z7                                                                       | 3-keto-L-gulonate 6-phosphate decarboxylase (EC 4.1.2.-)                                                              | Escherichia coli (strain 55989 / EAEC)         |
| 96075  | 3023641 | 3024531 TY-2482_chromosome | C8TZI5                                                                       | Predicted L-xylulose 5-phosphate 3-epimerase                                                                          | Escherichia coli O103:H2 (strain 12009 / EHEC) |
| 98487  | 3024528 | 3025220 TY-2482_chromosome | B7L6Z9                                                                       | L-ribulose-5-phosphate 4-epimerase (EC 5.1.3.4)                                                                       | Escherichia coli (strain 55989 / EAEC)         |
| 77315  | 3026358 | 3025621 TY-2482_chromosome | B7L700                                                                       | Putative uncharacterized protein yiaT                                                                                 | Escherichia coli (strain 55989 / EAEC)         |
| 62649  | 3026482 | 3027453 TY-2482_chromosome | B7L701                                                                       | Putative DNA-binding transcriptional regulator                                                                        | Escherichia coli (strain 55989 / EAEC)         |
| 72427  | 3028589 | 3027456 TY-2482_chromosome | B7L6Z8                                                                       | Membrane fusion protein (MFP) component of efflux pump, signal anchor                                                 | Escherichia coli (strain 55989 / EAEC)         |
| 73628  | 3028918 | 3028598 TY-2482_chromosome | B7L703                                                                       | Putative uncharacterized protein yiaW                                                                                 | Escherichia coli (strain 55989 / EAEC)         |
| 27169  | 3029032 | 3029241 TY-2482_chromosome | B7L702                                                                       | Putative uncharacterized protein                                                                                      | Escherichia coli (strain 55989 / EAEC)         |
| 88218  | 3031001 | 3029466 TY-2482_chromosome | B7L705                                                                       | Aldehyde dehydrogenase B (EC 1.2.1.22)                                                                                | Escherichia coli (strain 55989 / EAEC)         |
| 113964 | 3032317 | 3031169 TY-2482_chromosome | B7L706                                                                       | Fe-containing alcohol dehydrogenase (EC 1.1.1.1)                                                                      | Escherichia coli (strain 55989 / EAEC)         |
| 106442 | 3034351 | 3032510 TY-2482_chromosome | B7L704                                                                       | Selenocysteinyl-tRNA-specific translation factor                                                                      | Escherichia coli (strain 55989 / EAEC)         |
| 33918  | 3035739 | 3034351 TY-2482_chromosome | B7L708                                                                       | L-seryl-tRNA(Sec) selenium transferase (EC 2.9.1.1) (Selenocysteine synthase) (Sec synthase) (Selenocysteinyl-tRNA(Si | Escherichia coli (strain 55989 / EAEC)         |
| 82509  | 3036445 | 3035840 TY-2482_chromosome | B7L709                                                                       | Putative glutathione S-transferase                                                                                    | Escherichia coli (strain 55989 / EAEC)         |
| 94463  | 3036674 | 3040636 TY-2482_chromosome | B7L711                                                                       | RhsB element core protein RshB                                                                                        | Escherichia coli (strain 55989 / EAEC)         |
| 61083  | 3040881 | 3041261 TY-2482_chromosome | B7L707                                                                       | Putative uncharacterized protein yhhH                                                                                 | Escherichia coli (strain 55989 / EAEC)         |
| 104355 | 3041369 | 3042208 TY-2482_chromosome | C8TME0                                                                       | Lyase containing HEAT-repeat                                                                                          | Escherichia coli O26:H11 (strain 11368 / EHEC) |
| 97127  | 3042253 | 3043194 TY-2482_chromosome | B7L717                                                                       | Putative uncharacterized protein                                                                                      | Escherichia coli (strain 55989 / EAEC)         |
| 67795  | 3043209 | 3043667 TY-2482_chromosome | B7L718                                                                       | Putative uncharacterized protein yibG                                                                                 | Escherichia coli (strain 55989 / EAEC)         |
| 28311  | 3043837 | 3044285 TY-2482_chromosome | Q3YVV7                                                                       | RhsB protein in rhs element                                                                                           | Shigella sonnei (strain S5046)                 |

|        |         |                            |        |                                                                                                                                                                      |                                                   |
|--------|---------|----------------------------|--------|----------------------------------------------------------------------------------------------------------------------------------------------------------------------|---------------------------------------------------|
| 12957  | 3044317 | 3044806 TY-2482_chromosome | D7Z8X7 | Putative uncharacterized protein                                                                                                                                     | Escherichia coli MS 69-1                          |
| 67912  | 3046405 | 3045272 TY-2482_chromosome | B7L715 | Putative uncharacterized protein yibH                                                                                                                                | Escherichia coli (strain 55989 / EAEC)            |
| 66380  | 3046770 | 3046411 TY-2482_chromosome | B7L721 | Putative uncharacterized protein yibI                                                                                                                                | Escherichia coli (strain 55989 / EAEC)            |
| 102766 | 3047307 | 3049217 TY-2482_chromosome | B7L722 | Fused mannitol-specific PTS enzymes: IIA components ; IIB components ; IIC components (EC 2.7.1.69)                                                                  | Escherichia coli (strain 55989 / EAEC)            |
| 32510  | 3049450 | 3050595 TY-2482_chromosome | B7L723 | Mannitol-1-phosphate 5-dehydrogenase (EC 1.1.1.17)                                                                                                                   | Escherichia coli (strain 55989 / EAEC)            |
| 88421  | 3050598 | 3051182 TY-2482_chromosome | B7L720 | DNA-binding repressor                                                                                                                                                | Escherichia coli (strain 55989 / EAEC)            |
| 73630  | 3051406 | 3051200 TY-2482_chromosome | B7L724 | Putative uncharacterized protein yibT                                                                                                                                | Escherichia coli (strain 55989 / EAEC)            |
| 29243  | 3051984 | 3051610 TY-2482_chromosome | A7ZTF2 | Putative uncharacterized protein                                                                                                                                     | Escherichia coli O139:H28 (strain E24377A / ETEC) |
| 95435  | 3052597 | 3053277 TY-2482_chromosome | B7L727 | Putative uncharacterized protein                                                                                                                                     | Escherichia coli (strain 55989 / EAEC)            |
| 104455 | 3053324 | 3058171 TY-2482_chromosome | B7L728 | Putative uncharacterized protein                                                                                                                                     | Escherichia coli (strain 55989 / EAEC)            |
| 112878 | 3058543 | 3060195 TY-2482_chromosome | B7L729 | L-lactate permease                                                                                                                                                   | Escherichia coli (strain 55989 / EAEC)            |
| 66242  | 3060198 | 3060971 TY-2482_chromosome | B7L730 | DNA-binding transcriptional repressor                                                                                                                                | Escherichia coli (strain 55989 / EAEC)            |
| 31909  | 3060971 | 3062158 TY-2482_chromosome | B7L725 | L-lactate dehydrogenase [cytochrome] (EC 1.1.2.3)                                                                                                                    | Escherichia coli (strain 55989 / EAEC)            |
| 77317  | 3062347 | 3062817 TY-2482_chromosome | B7L732 | tRNA (cytidine/uridine-2'-O-)-methyltransferase TrmL (EC 2.1.1.-)                                                                                                    | Escherichia coli (strain 55989 / EAEC)            |
| 106410 | 3063694 | 3062876 TY-2482_chromosome | B7L731 | Serine acetyltransferase (EC 2.3.1.30)                                                                                                                               | Escherichia coli (strain 55989 / EAEC)            |
| 31196  | 3064793 | 3063777 TY-2482_chromosome | B7L734 | Glycerol-3-phosphate dehydrogenase [NAD(P)+] (EC 1.1.1.94) (NAD(P)H-dependent glycerol-3-phosphate dehydrogenase)                                                    | Escherichia coli (strain 55989 / EAEC)            |
| 33910  | 3065260 | 3064796 TY-2482_chromosome | B7L735 | Protein-export protein secB                                                                                                                                          | Escherichia coli (strain 55989 / EAEC)            |
| 66382  | 3065574 | 3065326 TY-2482_chromosome | B7L736 | Glutaredoxin 3                                                                                                                                                       | Escherichia coli (strain 55989 / EAEC)            |
| 100625 | 3066147 | 3065719 TY-2482_chromosome | B7L733 | Putative rhodanese-related sulfurtransferase                                                                                                                         | Escherichia coli (strain 55989 / EAEC)            |
| 28729  | 3066171 | 3066365 TY-2482_chromosome | B6I3J1 | Putative uncharacterized protein                                                                                                                                     | Escherichia coli (strain SE11)                    |
| 58492  | 3066392 | 3067933 TY-2482_chromosome | B7L738 | 2,3-bisphosphoglycerate-independent phosphoglycerate mutase (BPG-independent PGAM) (Phosphoglyceromutase)                                                            | Escherichia coli (strain 55989 / EAEC)            |
| 112506 | 3067970 | 3069226 TY-2482_chromosome | B7L739 | Protease with a role in cell division                                                                                                                                | Escherichia coli (strain 55989 / EAEC)            |
| 77340  | 3069233 | 3070189 TY-2482_chromosome | B7L737 | Putative polysaccharide deacetylase                                                                                                                                  | Escherichia coli (strain 55989 / EAEC)            |
| 86344  | 3071213 | 3070182 TY-2482_chromosome | B7L741 | Putative glycosyl transferase                                                                                                                                        | Escherichia coli (strain 55989 / EAEC)            |
| 26859  | 3071443 | 3072465 TY-2482_chromosome | Q1R4X5 | Putative uncharacterized protein                                                                                                                                     | Escherichia coli (strain UTI89 / UPEC)            |
| 90138  | 3073683 | 3072490 TY-2482_chromosome | B7L740 | Glycine C-acetyltransferase (EC 2.3.3.29)                                                                                                                            | Escherichia coli (strain 55989 / EAEC)            |
| 104462 | 3074815 | 3073961 TY-2482_chromosome | B7L743 | Putative uncharacterized protein htrI                                                                                                                                | Escherichia coli (strain 55989 / EAEC)            |
| 31409  | 3075119 | 3076048 TY-2482_chromosome | B7L745 | ADP-L-glycero-D-manno-heptose-6-epimerase (EC 5.1.3.20) (ADP-L-glycero-beta-D-manno-heptose-6-epimerase) (ADP-epimerase)                                             | Escherichia coli (strain 55989 / EAEC)            |
| 98118  | 3076061 | 3077104 TY-2482_chromosome | B7L746 | ADP-heptose:LPS heptosyltransferase II (EC 2.-.-.-)                                                                                                                  | Escherichia coli (strain 55989 / EAEC)            |
| 113882 | 3077111 | 3078100 TY-2482_chromosome | B7L744 | ADP-heptose:LPS heptosyl transferase I (EC 2.-.-.-)                                                                                                                  | Escherichia coli (strain 55989 / EAEC)            |
| 59043  | 3078100 | 3079305 TY-2482_chromosome | B7L748 | O-antigen ligase                                                                                                                                                     | Escherichia coli (strain 55989 / EAEC)            |
| 86018  | 3080486 | 3079347 TY-2482_chromosome | B7L749 | Lipopolysaccharide 1, 2-N-acetylglucosaminettransferase (EC 2.4.1.56)                                                                                                | Escherichia coli (strain 55989 / EAEC)            |
| 110566 | 3081508 | 3080498 TY-2482_chromosome | B7L750 | Lipopolysaccharide 1,2-glucosyltransferase (EC 2.4.1.58)                                                                                                             | Escherichia coli (strain 55989 / EAEC)            |
| 81135  | 3082240 | 3081536 TY-2482_chromosome | B7L751 | Lipopolysaccharide core biosynthesis protein rfaY                                                                                                                    | Escherichia coli (strain 55989 / EAEC)            |
| 91793  | 3083273 | 3082269 TY-2482_chromosome | B7L752 | Lipopolysaccharide 1,3-galactosyltransferase (EC 2.4.1.44)                                                                                                           | Escherichia coli (strain 55989 / EAEC)            |
| 59044  | 3084122 | 3083319 TY-2482_chromosome | B7L753 | Kinase that phosphorylates core heptose of lipopolysaccharide                                                                                                        | Escherichia coli (strain 55989 / EAEC)            |
| 104337 | 3085230 | 3084109 TY-2482_chromosome | B7L754 | Glucosyltransferase I (EC 2.4.1.-)                                                                                                                                   | Escherichia coli (strain 55989 / EAEC)            |
| 77318  | 3086285 | 3085230 TY-2482_chromosome | B7L755 | Lipopolysaccharide core biosynthesis protein                                                                                                                         | Escherichia coli (strain 55989 / EAEC)            |
| 89810  | 3086698 | 3087972 TY-2482_chromosome | B7L756 | 3-deoxy-D-manno-octulosonic-acid transferase (KDO transferase)                                                                                                       | Escherichia coli (strain 55989 / EAEC)            |
| 30361  | 3087983 | 3088459 TY-2482_chromosome | B7L747 | Phosphopantetheine adenyllyltransferase (EC 2.7.7.3) (Dephospho-CoA pyrophosphorylase) (Pantetheine-phosphate-adenyltransferase)                                     | Escherichia coli (strain 55989 / EAEC)            |
| 31010  | 3089310 | 3088504 TY-2482_chromosome | B7L758 | Formamidopyrimidine-DNA glycosylase (Fapy-DNA glycosylase) (EC 3.2.2.23) (DNA-(apurinic or apyrimidinic site) lyase)                                                 | Escherichia coli (strain 55989 / EAEC)            |
| 24824  | 3089324 | 3089596 TY-2482_chromosome | Q1R4V7 | Putative uncharacterized protein                                                                                                                                     | Escherichia coli (strain UTI89 / UPEC)            |
| 33518  | 3089832 | 3089599 TY-2482_chromosome | B7L760 | 50S ribosomal protein L28                                                                                                                                            | Escherichia coli (strain 55989 / EAEC)            |
| 34967  | 3090717 | 3090052 TY-2482_chromosome | B7L757 | UPF0758 protein yicR                                                                                                                                                 | Escherichia coli (strain 55989 / EAEC)            |
| 106411 | 3090889 | 3092106 TY-2482_chromosome | B7L762 | Fused 4'-phosphopantothenoilcysteine decarboxylase ; phosphopantothenoilcysteine synthetase, FMN-binding (EC 2.7.1.15) (4-phosphopantothenoilcysteine decarboxylase) | Escherichia coli (strain 55989 / EAEC)            |
| 30699  | 3092087 | 3092542 TY-2482_chromosome | B5YWD8 | Deoxyuridine 5'-triphosphate nucleotidohydrolase (dUTPase) (EC 3.6.1.23) (dUTP pyrophosphatase)                                                                      | Escherichia coli O157:H7 (strain EC4115 / EHEC)   |
| 33944  | 3092652 | 3093245 TY-2482_chromosome | B7L761 | HTH-type protein slmA                                                                                                                                                | Escherichia coli (strain 55989 / EAEC)            |
| 33205  | 3093926 | 3093288 TY-2482_chromosome | B7L766 | Orotate phosphoribosyltransferase (OPRT) (OPRTase) (EC 2.4.2.10)                                                                                                     | Escherichia coli (strain 55989 / EAEC)            |
| 23896  | 3094640 | 3094819 TY-2482_chromosome | E3X542 | Putative uncharacterized protein                                                                                                                                     | Escherichia coli 2362-75                          |
| 60971  | 3094732 | 3093995 TY-2482_chromosome | B7L767 | Ribonuclease PH (RNase PH) (EC 2.7.7.56) (tRNA nucleotidyltransferase)                                                                                               | Escherichia coli (strain 55989 / EAEC)            |
| 66383  | 3094835 | 3095695 TY-2482_chromosome | B7L765 | Putative uncharacterized protein yicC                                                                                                                                | Escherichia coli (strain 55989 / EAEC)            |
| 60870  | 3095907 | 3096740 TY-2482_chromosome | B7L769 | DNA-damage-inducible protein                                                                                                                                         | Escherichia coli (strain 55989 / EAEC)            |
| 108568 | 3097035 | 3097649 TY-2482_chromosome | B7L770 | Putative uncharacterized protein yicG                                                                                                                                | Escherichia coli (strain 55989 / EAEC)            |
| 15076  | 3099246 | 3099536 TY-2482_chromosome | D7XWY5 | Conserved domain protein                                                                                                                                             | Escherichia coli MS 84-1                          |
| 31886  | 3099331 | 3097652 TY-2482_chromosome | B7L771 | DNA ligase B (EC 6.5.1.2) (Polydeoxyribonucleotide synthase [NAD+] B)                                                                                                | Escherichia coli (strain 55989 / EAEC)            |
| 76561  | 3099589 | 3100209 TY-2482_chromosome | B7L768 | Guanylate kinase (EC 2.7.4.8)                                                                                                                                        | Escherichia coli (strain 55989 / EAEC)            |
| 33678  | 3100267 | 3100539 TY-2482_chromosome | B7L773 | DNA-directed RNA polymerase subunit omega (RNAP omega subunit) (EC 2.7.7.6) (RNA polymerase omega subunit) (EC 2.7.7.6)                                              | Escherichia coli (strain 55989 / EAEC)            |
| 87485  | 3100561 | 3102666 TY-2482_chromosome | B7L774 | Bifunctional (P)ppGpp synthetase II and guanosine-3',5'-bis pyrophosphate 3'-pyrophosphohydrolase (EC 2.7.6.5) (EC 2.7.6.5)                                          | Escherichia coli (strain 55989 / EAEC)            |
| 58438  | 3102676 | 3103362 TY-2482_chromosome | B7L775 | tRNA (Guanosine-2'-O-)-methyltransferase                                                                                                                             | Escherichia coli (strain 55989 / EAEC)            |
| 106412 | 3103371 | 3105449 TY-2482_chromosome | B7L772 | ATP-dependent DNA helicase (EC 3.6.1.-)                                                                                                                              | Escherichia coli (strain 55989 / EAEC)            |
| 112871 | 3106823 | 3105621 TY-2482_chromosome | B7L777 | Glutamate transporter                                                                                                                                                | Escherichia coli (strain 55989 / EAEC)            |
| 98438  | 3107103 | 3108491 TY-2482_chromosome | B7L778 | Putative transporter                                                                                                                                                 | Escherichia coli (strain 55989 / EAEC)            |
| 115563 | 3108615 | 3110321 TY-2482_chromosome | B7L776 | Putative uncharacterized protein yicH                                                                                                                                | Escherichia coli (strain 55989 / EAEC)            |
| 71757  | 3112695 | 3110380 TY-2482_chromosome | B7L780 | Putative alpha-glucosidase (EC 3.2.1.20)                                                                                                                             | Escherichia coli (strain 55989 / EAEC)            |



|        |         |                            |                                                                              |                                                                                 |                                                 |
|--------|---------|----------------------------|------------------------------------------------------------------------------|---------------------------------------------------------------------------------|-------------------------------------------------|
| 110613 | 3114087 | 3112708 TY-2482_chromosome | B7L781                                                                       | Putative transporter                                                            | Escherichia coli (strain 55989 / EAEC)          |
| r196   | 3114380 | 3114474 TY-2482_chromosome | ref NC_010473 :3931829-3931923 Sec tRNA [gene=selC] [locus_tag=ECDH10B_3840] |                                                                                 |                                                 |
| 19976  | 3114534 | 3114181 TY-2482_chromosome | D8CB43                                                                       | Conserved domain protein                                                        | Escherichia coli MS 185-1                       |
| 77112  | 3114696 | 3115955 TY-2482_chromosome | B5WYF9                                                                       | Integrase                                                                       | Escherichia coli O157:H7 (strain EC4115 / EHEC) |
| 14370  | 3116774 | 3116080 TY-2482_chromosome | E1U309                                                                       | Transposase InsAB'                                                              | Escherichia coli                                |
| 35853  | 3119960 | 3116967 TY-2482_chromosome | Q4MUS7                                                                       | Transposase (Transposase X)                                                     | Bacillus cereus G9241                           |
| 94624  | 3120493 | 3119936 TY-2482_chromosome | D3H359                                                                       | Transposon Tn21 resolvase                                                       | Escherichia coli O44:H18 (strain 042 / EAEC)    |
| 15083  | 3121233 | 3120622 TY-2482_chromosome | C7S9T2                                                                       | Transposon Tn21 modulator protein                                               | Escherichia coli                                |
| 20211  | 3122142 | 3122813 TY-2482_chromosome | C7S9T5                                                                       | Dihydrofolate reductase type VII                                                | Escherichia coli                                |
| 104135 | 3122185 | 3121175 TY-2482_chromosome | D3H361                                                                       | Integrase                                                                       | Escherichia coli O44:H18 (strain 042 / EAEC)    |
| 19395  | 3123010 | 3123390 TY-2482_chromosome | Q3I3P0                                                                       | ORF3-QacEdelta1 fusion protein                                                  | Escherichia coli                                |
| 60552  | 3123387 | 3124163 TY-2482_chromosome | D3H364                                                                       | Dihydropteroate synthase type-1 (EC 2.5.1.15)                                   | Escherichia coli O44:H18 (strain 042 / EAEC)    |
| 53350  | 3124904 | 3124203 TY-2482_chromosome | Q7AQT7                                                                       | Putative transposase                                                            | Salmonella typhi                                |
| 66979  | 3125352 | 3124954 TY-2482_chromosome | C8UQP4                                                                       | Conserved predicted protein                                                     | Escherichia coli O111:H- (strain 11128 / EHEC)  |
| 105703 | 3125826 | 3126080 TY-2482_chromosome | C8UQP5                                                                       | TEM-1 beta-lactamase                                                            | Escherichia coli O111:H- (strain 11128 / EHEC)  |
| 105702 | 3125831 | 3125505 TY-2482_chromosome | C8UQP5                                                                       | TEM-1 beta-lactamase                                                            | Escherichia coli O111:H- (strain 11128 / EHEC)  |
| 66980  | 3126233 | 3126631 TY-2482_chromosome | C8UQP4                                                                       | Conserved predicted protein                                                     | Escherichia coli O111:H- (strain 11128 / EHEC)  |
| 53351  | 3126681 | 3127382 TY-2482_chromosome | Q7AQT7                                                                       | Putative transposase                                                            | Salmonella typhi                                |
| 13974  | 3128042 | 3128989 TY-2482_chromosome | E3PY55                                                                       | Replication protein C                                                           | Escherichia coli                                |
| 82442  | 3129300 | 3130112 TY-2482_chromosome | C8UQP1                                                                       | Sulfonamide-resistant dihydropteroate synthase                                  | Escherichia coli O111:H- (strain 11128 / EHEC)  |
| 11978  | 3130176 | 3131105 TY-2482_chromosome | A8SP25                                                                       | StrA                                                                            | Escherichia coli                                |
| 53349  | 3132580 | 3131879 TY-2482_chromosome | Q7AQT7                                                                       | Putative transposase                                                            | Salmonella typhi                                |
| 79314  | 3133931 | 3132630 TY-2482_chromosome | D3H369                                                                       | Putative transposase                                                            | Escherichia coli O44:H18 (strain 042 / EAEC)    |
| 25657  | 3134854 | 3133973 TY-2482_chromosome | Q5J458                                                                       | Urf2                                                                            | Salmonella choleraesuis                         |
| 115809 | 3135269 | 3134910 TY-2482_chromosome | D3H372                                                                       | MerR-family transcriptional regulator                                           | Escherichia coli O44:H18 (strain 042 / EAEC)    |
| 113578 | 3136981 | 3135290 TY-2482_chromosome | Q935L3                                                                       | Putative mercuric reductase (EC 1.16.1.1)                                       | Salmonella typhi                                |
| 8580   | 3137494 | 3137036 TY-2482_chromosome | Q02KL6                                                                       | Mercuric resistance operon transport protein MerC (Putative uncharacterized pro | Escherichia coli                                |
| 96677  | 3137766 | 3137494 TY-2482_chromosome | D3H375                                                                       | Mercuric ion transport protein                                                  | Escherichia coli O44:H18 (strain 042 / EAEC)    |
| 105131 | 3138130 | 3137783 TY-2482_chromosome | C8UQM9                                                                       | Mercuric ion transport protein MerT                                             | Escherichia coli O111:H- (strain 11128 / EHEC)  |
| 96933  | 3138202 | 3138633 TY-2482_chromosome | C8UQM8                                                                       | Mercuric resistance operon regulatory protein MerR                              | Escherichia coli O111:H- (strain 11128 / EHEC)  |
| 5322   | 3140116 | 3139007 TY-2482_chromosome | P11901                                                                       | Transposase for insertion sequence element IS421                                | Escherichia coli                                |
| 111823 | 3140911 | 3140579 TY-2482_chromosome | D3H379                                                                       | Putative uncharacterized protein                                                | Escherichia coli O44:H18 (strain 042 / EAEC)    |
| 15990  | 3140964 | 3141227 TY-2482_chromosome | E5FD82                                                                       | Relaxase (Fragment)                                                             | Klebsiella pneumoniae                           |
| 72641  | 3141912 | 3141265 TY-2482_chromosome | D3H381                                                                       | Tetracycline repressor                                                          | Escherichia coli O44:H18 (strain 042 / EAEC)    |
| 91293  | 3142018 | 3143214 TY-2482_chromosome | D3H382                                                                       | Tetracycline resistance protein                                                 | Escherichia coli O44:H18 (strain 042 / EAEC)    |
| 8470   | 3144160 | 3143252 TY-2482_chromosome | Q6SJ76                                                                       | PecM (PecM-like protein) (Protein pecM)                                         | Escherichia coli                                |
| 79315  | 3144837 | 3144097 TY-2482_chromosome | D3H369                                                                       | Putative transposase                                                            | Escherichia coli O44:H18 (strain 042 / EAEC)    |
| 107872 | 3145618 | 3145351 TY-2482_chromosome | B7LG76                                                                       | Putative uncharacterized protein                                                | Escherichia coli (strain 55989 / EAEC)          |
| 12861  | 3145940 | 3145557 TY-2482_chromosome | Q5I3K5                                                                       | Aec60                                                                           | Escherichia coli                                |
| 25378  | 3146672 | 3146106 TY-2482_chromosome | D2NGS8                                                                       | Putative uncharacterized protein                                                | Escherichia coli O150:H5 (strain SE15)          |
| 68255  | 3147708 | 3147419 TY-2482_chromosome | Q0TDJ8                                                                       | Putative hemolysin expression modulating protein                                | Escherichia coli O6:K15:H31 (strain 536 / UPEC) |
| 115826 | 3148140 | 3148538 TY-2482_chromosome | B7LDW1                                                                       | Putative uncharacterized protein                                                | Escherichia coli (strain 55989 / EAEC)          |
| 75582  | 3148481 | 3149235 TY-2482_chromosome | C8TTS1                                                                       | Conserved predicted protein                                                     | Escherichia coli O26:H11 (strain 11368 / EHEC)  |
| 12378  | 3149872 | 3150217 TY-2482_chromosome | E9YZX6                                                                       | IstB ATP binding protein                                                        | Escherichia coli M863                           |
| 52691  | 3151826 | 3152695 TY-2482_chromosome | C8TWJ4                                                                       | Putative uncharacterized protein                                                | Escherichia coli O103:H2 (strain 12009 / EHEC)  |
| 104657 | 3152695 | 3153666 TY-2482_chromosome | C8TV65                                                                       | Putative uncharacterized protein                                                | Escherichia coli O26:H11 (strain 11368 / EHEC)  |
| 105928 | 3153931 | 3156885 TY-2482_chromosome | C8TNL5                                                                       | Putative AidA-I adhesin-like protein                                            | Escherichia coli O26:H11 (strain 11368 / EHEC)  |
| 14427  | 3156923 | 3157114 TY-2482_chromosome | B3Y1R9                                                                       | Predicted protein                                                               | Escherichia coli O111:H-                        |
| 56483  | 3157272 | 3158087 TY-2482_chromosome | C8TWJ8                                                                       | Putative uncharacterized protein                                                | Escherichia coli O103:H2 (strain 12009 / EHEC)  |
| 26740  | 3158259 | 3158212 TY-2482_chromosome | Q1RA72                                                                       | Putative uncharacterized protein                                                | Escherichia coli (strain UT189 / UPEC)          |
| 47868  | 3159382 | 3158426 TY-2482_chromosome | Q5K5L6                                                                       | Putative uncharacterized protein                                                | Escherichia coli                                |
| 68099  | 3159733 | 3160215 TY-2482_chromosome | D3GX48                                                                       | Putative uncharacterized protein                                                | Escherichia coli O44:H18 (strain 042 / EAEC)    |
| 108195 | 3160151 | 3160639 TY-2482_chromosome | B7MNN7                                                                       | Toxin of the YeeV-YeeU toxin-antitoxin system                                   | Escherichia coli O45:K1 (strain S88 / ExPEC)    |
| 61212  | 3160639 | 3161124 TY-2482_chromosome | B7LBT9                                                                       | Putative uncharacterized protein yeeW                                           | Escherichia coli (strain 55989 / EAEC)          |
| 24594  | 3161429 | 3162271 TY-2482_chromosome | B7MSL6                                                                       | Putative uncharacterized protein                                                | Escherichia coli O81 (strain ED1a)              |
| 106475 | 3163067 | 3164248 TY-2482_chromosome | B7L779                                                                       | Putative sugar efflux system                                                    | Escherichia coli (strain 55989 / EAEC)          |
| 97644  | 3164362 | 3165282 TY-2482_chromosome | B7L784                                                                       | Putative uncharacterized protein yicJ                                           | Escherichia coli (strain 55989 / EAEC)          |
| 95499  | 3166107 | 3165292 TY-2482_chromosome | B7L785                                                                       | Cytoplasmic membrane lipoprotein-28                                             | Escherichia coli (strain 55989 / EAEC)          |
| 61188  | 3166329 | 3166619 TY-2482_chromosome | B7L783                                                                       | Putative uncharacterized protein yicS                                           | Escherichia coli (strain 55989 / EAEC)          |
| 95501  | 3168012 | 3166666 TY-2482_chromosome | B7L787                                                                       | Transporter                                                                     | Escherichia coli (strain 55989 / EAEC)          |
| 93061  | 3168537 | 3168061 TY-2482_chromosome | D3H2G2                                                                       | Putative exported protein                                                       | Escherichia coli O44:H18 (strain 042 / EAEC)    |
| 91816  | 3169897 | 3168566 TY-2482_chromosome | B7L788                                                                       | Putative xanthine/uracil permease                                               | Escherichia coli (strain 55989 / EAEC)          |
| 29718  | 3170072 | 3171835 TY-2482_chromosome | B7L789                                                                       | Adenine deaminase (Adenase) (Adenine aminase) (EC 3.5.4.2)                      | Escherichia coli (strain 55989 / EAEC)          |
| 91820  | 3173274 | 3171886 TY-2482_chromosome | B7L790                                                                       | Hexose phosphate transporter                                                    | Escherichia coli (strain 55989 / EAEC)          |

|        |         |                            |        |                                                                                                        |                                                  |
|--------|---------|----------------------------|--------|--------------------------------------------------------------------------------------------------------|--------------------------------------------------|
| 65818  | 3174731 | 3173415 TY-2482_chromosome | B7L809 | Membrane protein regulates uhpT expression                                                             | Escherichia coli (strain 55989 / EAEC)           |
| 78880  | 3176243 | 3174744 TY-2482_chromosome | B7L808 | Sensory histidine kinase in two-component regulatory sytem with UhpA                                   | Escherichia coli (strain 55989 / EAEC)           |
| 105874 | 3176833 | 3176246 TY-2482_chromosome | B7L811 | DNA-binding response regulator in two-component regulatory system wth UhpE                             | Escherichia coli (strain 55989 / EAEC)           |
| 68611  | 3177198 | 3176911 TY-2482_chromosome | B7L812 | Acetolactate synthase I, small subunit (EC 2.2.1.6)                                                    | Escherichia coli (strain 55989 / EAEC)           |
| 66359  | 3178874 | 3179368 TY-2482_chromosome | B7L810 | Putative uncharacterized protein                                                                       | Escherichia coli (strain 55989 / EAEC)           |
| 95479  | 3178890 | 3177205 TY-2482_chromosome | B7L813 | Acetolactate synthase (EC 2.2.1.6)                                                                     | Escherichia coli (strain 55989 / EAEC)           |
| 22726  | 3179789 | 3180124 TY-2482_chromosome | E1HWK4 | Putative uncharacterized protein (Fragment)                                                            | Escherichia coli MS 78-1                         |
| 20994  | 3179874 | 3179518 TY-2482_chromosome | E1JD58 | Conserved domain protein                                                                               | Escherichia coli MS 124-1                        |
| 91303  | 3180167 | 3181348 TY-2482_chromosome | B7L816 | Multidrug efflux system protein                                                                        | Escherichia coli (strain 55989 / EAEC)           |
| 68117  | 3181856 | 3181362 TY-2482_chromosome | B7L817 | Putative DNA-binding transcriptional regulator                                                         | Escherichia coli (strain 55989 / EAEC)           |
| 112331 | 3182215 | 3181856 TY-2482_chromosome | B7L819 | Putative uncharacterized protein yidG                                                                  | Escherichia coli (strain 55989 / EAEC)           |
| 102784 | 3182552 | 3182208 TY-2482_chromosome | B7L820 | Putative uncharacterized protein yidH                                                                  | Escherichia coli (strain 55989 / EAEC)           |
| 68183  | 3182661 | 3183107 TY-2482_chromosome | B7L818 | Putative uncharacterized protein yidI                                                                  | Escherichia coli (strain 55989 / EAEC)           |
| 59054  | 3184650 | 3183160 TY-2482_chromosome | B7L822 | Putative sulfatase/phosphatase                                                                         | Escherichia coli (strain 55989 / EAEC)           |
| 73653  | 3186362 | 3184650 TY-2482_chromosome | B7L823 | Transporter                                                                                            | Escherichia coli (strain 55989 / EAEC)           |
| 69952  | 3186499 | 3187419 TY-2482_chromosome | B7L821 | Putative DNA-binding transcriptional regulator                                                         | Escherichia coli (strain 55989 / EAEC)           |
| 60525  | 3187643 | 3187422 TY-2482_chromosome | C6UY52 | Putative 6-phospho-beta-glucosidase                                                                    | Escherichia coli O157:H7 (strain TW14359 / EHEC) |
| 114658 | 3188233 | 3187598 TY-2482_chromosome | C8TLC9 | Predicted 6-phospho-beta-glucosidase, NAD(P)-binding                                                   | Escherichia coli O26:H11 (strain 11368 / EHEC)   |
| 65259  | 3190110 | 3188236 TY-2482_chromosome | B7L827 | Putative PTS system alpha-glucoside-specific EIIcB component (EC 2.7.1.69)                             | Escherichia coli (strain 55989 / EAEC)           |
| 105678 | 3190145 | 3190858 TY-2482_chromosome | B7L828 | Putative DNA-binding transcriptional regulator                                                         | Escherichia coli (strain 55989 / EAEC)           |
| 34973  | 3192519 | 3190861 TY-2482_chromosome | B7L824 | Putative transport protein YidE                                                                        | Escherichia coli (strain 55989 / EAEC)           |
| 97046  | 3193150 | 3192719 TY-2482_chromosome | D3H311 | Small heat shock protein ibpB (16 kDa heat shock protein B)                                            | Escherichia coli O44:H18 (strain 042 / EAEC)     |
| 71216  | 3193675 | 3193259 TY-2482_chromosome | D3H312 | Small heat shock protein ibpA (16 kDa heat shock protein A)                                            | Escherichia coli O44:H18 (strain 042 / EAEC)     |
| 88259  | 3193975 | 3194304 TY-2482_chromosome | B7L832 | Putative uncharacterized protein yidQ                                                                  | Escherichia coli (strain 55989 / EAEC)           |
| 61042  | 3195523 | 3194312 TY-2482_chromosome | B7L833 | Putative uncharacterized protein yidR                                                                  | Escherichia coli (strain 55989 / EAEC)           |
| 79099  | 3195624 | 3196685 TY-2482_chromosome | B7L829 | Putative oxidoreductase with FAD/NAD(P)-binding domain                                                 | Escherichia coli (strain 55989 / EAEC)           |
| 112773 | 3197977 | 3196688 TY-2482_chromosome | B7L834 | D-galactonate transporter                                                                              | Escherichia coli (strain 55989 / EAEC)           |
| 30603  | 3199245 | 3198100 TY-2482_chromosome | B7L836 | D-galactonate dehydratase (GalD) (EC 4.2.1.6)                                                          | Escherichia coli (strain 55989 / EAEC)           |
| 95489  | 3199859 | 3199245 TY-2482_chromosome | B7L835 | 2-oxo-3-deoxygalactonate 6-phosphate aldolase (EC 4.1.2.21)                                            | Escherichia coli (strain 55989 / EAEC)           |
| 84502  | 3200721 | 3199846 TY-2482_chromosome | B7L838 | 2-oxo-3-deoxygalactonate kinase (EC 2.7.1.58)                                                          | Escherichia coli (strain 55989 / EAEC)           |
| 102786 | 3201407 | 3200721 TY-2482_chromosome | B7L837 | Putative DNA-binding transcriptional regulator                                                         | Escherichia coli (strain 55989 / EAEC)           |
| 91811  | 3201685 | 3202338 TY-2482_chromosome | B7L840 | Putative lipoprotein C                                                                                 | Escherichia coli (strain 55989 / EAEC)           |
| 99068  | 3203199 | 3202390 TY-2482_chromosome | B7L841 | Putative hydrolase                                                                                     | Escherichia coli (strain 55989 / EAEC)           |
| 9020   | 3203721 | 3203317 TY-2482_chromosome | C3SLN7 | DNA gyrase subunit B GyrB                                                                              | Escherichia coli                                 |
| 110602 | 3206366 | 3203955 TY-2482_chromosome | B7L843 | DNA gyrase subunit B (EC 5.99.1.3)                                                                     | Escherichia coli (strain 55989 / EAEC)           |
| 33300  | 3207468 | 3206398 TY-2482_chromosome | B7L842 | DNA replication and repair protein recF                                                                | Escherichia coli (strain 55989 / EAEC)           |
| 91219  | 3208568 | 3207471 TY-2482_chromosome | B7L845 | DNA polymerase III, beta subunit (EC 2.7.7.7)                                                          | Escherichia coli (strain 55989 / EAEC)           |
| 30639  | 3209976 | 3208576 TY-2482_chromosome | B7L846 | Chromosomal replication initiator protein DnaA                                                         | Escherichia coli (strain 55989 / EAEC)           |
| 113874 | 3210470 | 3210273 TY-2482_chromosome | B5YXA5 | Putative uncharacterized protein                                                                       | Escherichia coli O157:H7 (strain EC4115 / EHEC)  |
| 33647  | 3210740 | 3211096 TY-2482_chromosome | B7L844 | Ribonuclease P protein component (RNase P protein) (RNaseP protein) (EC 3.1.26.5) (Protein C5)         | Escherichia coli (strain 55989 / EAEC)           |
| 34971  | 3211063 | 3211317 TY-2482_chromosome | B7L848 | UPF0161 protein yidD                                                                                   | Escherichia coli (strain 55989 / EAEC)           |
| 32845  | 3211323 | 3212966 TY-2482_chromosome | B7L849 | Inner membrane protein oxaA                                                                            | Escherichia coli (strain 55989 / EAEC)           |
| 32426  | 3213075 | 3214436 TY-2482_chromosome | B7L851 | tRNA modification GTPase mnmE (EC 3.6.-.-)                                                             | Escherichia coli (strain 55989 / EAEC)           |
| 34284  | 3214977 | 3216389 TY-2482_chromosome | B7L853 | Tryptophanase (EC 4.1.99.1) (L-tryptophan indole-lyase) (TNase)                                        | Escherichia coli (strain 55989 / EAEC)           |
| 84503  | 3216483 | 3217727 TY-2482_chromosome | B7L854 | Tryptophan transporter of low affinity                                                                 | Escherichia coli (strain 55989 / EAEC)           |
| 32234  | 3217863 | 3219035 TY-2482_chromosome | B7L855 | Multidrug resistance protein mdlT                                                                      | Escherichia coli (strain 55989 / EAEC)           |
| 34977  | 3219013 | 3219969 TY-2482_chromosome | B7L852 | HTH-type transcriptional regulator yidZ                                                                | Escherichia coli (strain 55989 / EAEC)           |
| 88339  | 3220117 | 3220875 TY-2482_chromosome | B7L857 | Putative phosphopantetheinyl transferase                                                               | Escherichia coli (strain 55989 / EAEC)           |
| 113926 | 3220900 | 3221463 TY-2482_chromosome | B7L858 | Chromate reductase, Class I, flavoprotein                                                              | Escherichia coli (strain 55989 / EAEC)           |
| 102787 | 3222857 | 3221523 TY-2482_chromosome | B7L859 | Putative uncharacterized protein yieG                                                                  | Escherichia coli (strain 55989 / EAEC)           |
| 80468  | 3223024 | 3223686 TY-2482_chromosome | B7L856 | Putative hydrolase                                                                                     | Escherichia coli (strain 55989 / EAEC)           |
| 69958  | 3223756 | 3224226 TY-2482_chromosome | B7L861 | Putative uncharacterized protein yiel                                                                  | Escherichia coli (strain 55989 / EAEC)           |
| 101196 | 3224278 | 3224862 TY-2482_chromosome | B7L862 | Putative uncharacterized protein cbrC                                                                  | Escherichia coli (strain 55989 / EAEC)           |
| 75160  | 3225649 | 3224930 TY-2482_chromosome | B7L863 | Putative 6-phosphogluconolactonase                                                                     | Escherichia coli (strain 55989 / EAEC)           |
| 84506  | 3226860 | 3225667 TY-2482_chromosome | B7L864 | Putative xylanase                                                                                      | Escherichia coli (strain 55989 / EAEC)           |
| 66213  | 3228476 | 3226863 TY-2482_chromosome | B7L860 | Carbohydrate-specific outer membrane porin, cryptic                                                    | Escherichia coli (strain 55989 / EAEC)           |
| 65530  | 3229956 | 3228565 TY-2482_chromosome | B7L866 | Cryptic phospho-beta-glucosidase B (EC 3.2.1.86)                                                       | Escherichia coli (strain 55989 / EAEC)           |
| 94401  | 3231852 | 3229978 TY-2482_chromosome | B7L867 | Fused beta-glucoside-specific PTS enzymes: IIA component ; IIB component ; IIC component (EC 2.7.1.69) | Escherichia coli (strain 55989 / EAEC)           |
| 61267  | 3232822 | 3231989 TY-2482_chromosome | C8UJ80 | Transcriptional antiterminator of the bgl operon                                                       | Escherichia coli O111:H- (strain 11128 / EHEC)   |
| 102791 | 3233833 | 3233111 TY-2482_chromosome | B7L870 | Negative regulator of PhoR/PhoB two-component regulator                                                | Escherichia coli (strain 55989 / EAEC)           |
| 86550  | 3234621 | 3233851 TY-2482_chromosome | B7L868 | Phosphate transporter subunit ; ATP-binding component of ABC superfamily (EC 3.6.3.27)                 | Escherichia coli (strain 55989 / EAEC)           |
| 93933  | 3235602 | 3234715 TY-2482_chromosome | B7L872 | Phosphate transporter subunit ; membrane component of ABC superfamily                                  | Escherichia coli (strain 55989 / EAEC)           |
| 110582 | 3235651 | 3235605 TY-2482_chromosome | B7L873 | Phosphate transporter subunit ; membrane component of ABC superfamily                                  | Escherichia coli (strain 55989 / EAEC)           |
| 61104  | 3237688 | 3236651 TY-2482_chromosome | B7L874 | Phosphate transporter subunit ; periplasmic-binding component of ABC superfamily                       | Escherichia coli (strain 55989 / EAEC)           |

|        |         |                            |                                                                                       |                                                                                                                        |                                                 |
|--------|---------|----------------------------|---------------------------------------------------------------------------------------|------------------------------------------------------------------------------------------------------------------------|-------------------------------------------------|
| 75755  | 3239009 | 3237939 TY-2482_chromosome | B7L871                                                                                | Putative fimbrial protein LpfD; putative adhesin                                                                       | Escherichia coli (strain 55989 / EAEC)          |
| 71653  | 3241542 | 3239023 TY-2482_chromosome | B7L876                                                                                | Putative fimbrial usher                                                                                                | Escherichia coli (strain 55989 / EAEC)          |
| 113927 | 3242298 | 3241570 TY-2482_chromosome | B7L877                                                                                | Putative fimbrial chaperone protein                                                                                    | Escherichia coli (strain 55989 / EAEC)          |
| 79173  | 3242918 | 3242349 TY-2482_chromosome | B7L875                                                                                | Putative major fimbrial subunit                                                                                        | Escherichia coli (strain 55989 / EAEC)          |
| 76402  | 3245049 | 3243223 TY-2482_chromosome | B7L879                                                                                | L-glutamine:D-fructose-6-phosphate aminotransferase (EC 2.6.1.16)                                                      | Escherichia coli (strain 55989 / EAEC)          |
| 31138  | 3246581 | 3245214 TY-2482_chromosome | B7L878                                                                                | Bifunctional protein glmU [Includes: UDP-N-acetylglucosamine pyrophosphorylase (EC 2.7.7.23) (N-acetylglucosamine      | Escherichia coli (strain 55989 / EAEC)          |
| 27840  | 3246827 | 3247372 TY-2482_chromosome | A1AHR3                                                                                | Putative uncharacterized protein                                                                                       | Escherichia coli O1:K1 / APEC                   |
| 30047  | 3248754 | 3247375 TY-2482_chromosome | B7L882                                                                                | ATP synthase subunit beta (EC 3.6.3.14) (ATP synthase F1 sector subunit beta) (F-ATPase subunit beta)                  | Escherichia coli (strain 55989 / EAEC)          |
| 30066  | 3249644 | 3248784 TY-2482_chromosome | B7L880                                                                                | ATP synthase gamma chain (ATP synthase F1 sector gamma subunit) (F-ATPase gamma subunit)                               | Escherichia coli (strain 55989 / EAEC)          |
| 30043  | 3251236 | 3249698 TY-2482_chromosome | B7L884                                                                                | ATP synthase subunit alpha (EC 3.6.3.14) (ATP synthase F1 sector subunit alpha) (F-ATPase subunit alpha)               | Escherichia coli (strain 55989 / EAEC)          |
| 25708  | 3251423 | 3252157 TY-2482_chromosome | Q1R4J7                                                                                | Putative uncharacterized protein                                                                                       | Escherichia coli (strain UT189 / UPEC)          |
| 30070  | 3252568 | 3252332 TY-2482_chromosome | B7L883                                                                                | ATP synthase subunit c (ATP synthase F(0) sector subunit c) (F-type ATPase subunit c) (F-ATPase subunit c) (Lipid-bind | Escherichia coli (strain 55989 / EAEC)          |
| 30039  | 3253430 | 3252618 TY-2482_chromosome | B7L888                                                                                | ATP synthase subunit a (ATP synthase F0 sector subunit a) (F-ATPase subunit 6)                                         | Escherichia coli (strain 55989 / EAEC)          |
| 78666  | 3253819 | 3253442 TY-2482_chromosome | B7L887                                                                                | ATP synthase, membrane-bound accessory subunit (EC 3.6.3.14)                                                           | Escherichia coli (strain 55989 / EAEC)          |
| 33799  | 3255059 | 3254439 TY-2482_chromosome | B7L890                                                                                | Ribosomal RNA small subunit methyltransferase G (EC 2.1.1.170) (16S rRNA 7-methylguanosine methyltransferase) (1       | Escherichia coli (strain 55989 / EAEC)          |
| 32430  | 3257012 | 3255126 TY-2482_chromosome | B7L889                                                                                | tRNA uridine 5-carboxymethylaminomethyl modification enzyme MnmG (Glucose-inhibited division protein A                 | Escherichia coli (strain 55989 / EAEC)          |
| 62702  | 3257834 | 3257394 TY-2482_chromosome | B7L892                                                                                | FMN-binding protein MicC                                                                                               | Escherichia coli (strain 55989 / EAEC)          |
| 80883  | 3258382 | 3257927 TY-2482_chromosome | B7L893                                                                                | DNA-binding transcriptional dual regulator                                                                             | Escherichia coli (strain 55989 / EAEC)          |
| 29937  | 3258534 | 3259523 TY-2482_chromosome | B7L891                                                                                | Aspartate--ammonia ligase (EC 6.3.1.1) (Asparagine synthetase A)                                                       | Escherichia coli (strain 55989 / EAEC)          |
| 34560  | 3260982 | 3259534 TY-2482_chromosome | B7L895                                                                                | Protein viaA (VWA domain protein interacting with AAA ATPase]                                                          | Escherichia coli (strain 55989 / EAEC)          |
| 33251  | 3262472 | 3260979 TY-2482_chromosome | B7L896                                                                                | ATPase rava (EC 3.6.3.-) (Regulatory ATPase variant A)                                                                 | Escherichia coli (strain 55989 / EAEC)          |
| 31802  | 3262695 | 3264560 TY-2482_chromosome | B7L897                                                                                | Low affinity potassium transport system protein kup (Kup system potassium uptake protein)                              | Escherichia coli (strain 55989 / EAEC)          |
| 4541   | 3264730 | 3265146 TY-2482_chromosome | B7L894                                                                                | D-ribose pyranase (EC 5.5.1.n1)                                                                                        | Escherichia coli (strain 55989 / EAEC)          |
| 99069  | 3265157 | 3266659 TY-2482_chromosome | B7L899                                                                                | Fused D-ribose transporter subunits of ABC superfamily: ATP-binding components                                         | Escherichia coli (strain 55989 / EAEC)          |
| 91147  | 3266667 | 3267629 TY-2482_chromosome | B7L8A0                                                                                | D-ribose transporter subunit; membrane component of ABC superfamily                                                    | Escherichia coli (strain 55989 / EAEC)          |
| 75969  | 3267657 | 3268544 TY-2482_chromosome | B7L8A1                                                                                | D-ribose transporter subunit; periplasmic-binding component of ABC superfamily                                         | Escherichia coli (strain 55989 / EAEC)          |
| 112232 | 3268658 | 3269599 TY-2482_chromosome | B5YY10                                                                                | Ribokinase (EC 2.7.1.15)                                                                                               | Escherichia coli O157:H7 (strain EC4115 / EHEC) |
| 95490  | 3269606 | 3270595 TY-2482_chromosome | B7L8A3                                                                                | DNA-binding transcriptional repressor of ribose metabolism                                                             | Escherichia coli (strain 55989 / EAEC)          |
| 73664  | 3271991 | 3270567 TY-2482_chromosome | B7L8A4                                                                                | Multidrug or homocysteine efflux system                                                                                | Escherichia coli (strain 55989 / EAEC)          |
| 69343  | 3272706 | 3272017 TY-2482_chromosome | B7L898                                                                                | Putative transcriptional regulator                                                                                     | Escherichia coli (strain 55989 / EAEC)          |
| r50    | 3273187 | 3274728 TY-2482_chromosome | ref NC_010473 :3522988-3524529 16S ribosomal RNA  [gene=rssD] [locus_tag=ECDH10B_3453 |                                                                                                                        |                                                 |
| 11306  | 3273333 | 3273100 TY-2482_chromosome | E9WNY3                                                                                | Putative uncharacterized protein                                                                                       | Escherichia coli E1520                          |
| 25825  | 3274308 | 3274625 TY-2482_chromosome | Q57H85                                                                                | ORF16-lacZ fusion protein                                                                                              | Salmonella choleraesuis                         |
| r240   | 3274797 | 3274873 TY-2482_chromosome | ref NC_010473 :4134084-4134160 Ile tRNA  [gene=ileT] [locus_tag=ECDH10B_4041          |                                                                                                                        |                                                 |
| r326   | 3274916 | 3274991 TY-2482_chromosome | ref NC_010473 :4134203-4134278 Ala tRNA  [gene=alaT] [locus_tag=ECDH10B_4042          |                                                                                                                        |                                                 |
| r1     | 3275175 | 3278078 TY-2482_chromosome | ref NC_010473 :4307762-4310665 23S ribosomal RNA  [gene=rrlE] [locus_tag=ECDH10B_4198 |                                                                                                                        |                                                 |
| 24098  | 3275703 | 3275401 TY-2482_chromosome | Q1R3T8                                                                                | Putative uncharacterized protein                                                                                       | Escherichia coli (strain UT189 / UPEC)          |
| 13800  | 3276964 | 3276761 TY-2482_chromosome | C1HUN3                                                                                | Putative uncharacterized protein                                                                                       | Escherichia sp. 3_2_53FAA                       |
| 20480  | 3277493 | 3277041 TY-2482_chromosome | C1HUN1                                                                                | Cell wall-associated hydrolase (Fragment)                                                                              | Escherichia sp. 3_2_53FAA                       |
| 22417  | 3277853 | 3277497 TY-2482_chromosome | C1HUN0                                                                                | Prolipoprotein diacylglycerol transferase (Fragment)                                                                   | Escherichia sp. 3_2_53FAA                       |
| r126   | 3278171 | 3278290 TY-2482_chromosome | ref NC_010473 :4043643-4043762 5S ribosomal RNA  [gene=rrfC] [locus_tag=ECDH10B_3948  |                                                                                                                        |                                                 |
| 25407  | 3278332 | 3278057 TY-2482_chromosome | Q1RFY5                                                                                | Putative uncharacterized protein                                                                                       | Escherichia coli (strain UT189 / UPEC)          |
| r248   | 3278343 | 3278419 TY-2482_chromosome | ref NC_010473 :4043815-4043891 Asp tRNA  [gene=aspT] [locus_tag=ECDH10B_3949]         |                                                                                                                        |                                                 |
| 45708  | 3278420 | 3278298 TY-2482_chromosome | Q8CLS5                                                                                | Putative uncharacterized protein                                                                                       | Yersinia pestis                                 |
| r333   | 3278428 | 3278503 TY-2482_chromosome | ref NC_010473 :4043900-4043975 Trp tRNA  [gene=trpT] [locus_tag=ECDH10B_3950          |                                                                                                                        |                                                 |
| 13136  | 3279438 | 3278602 TY-2482_chromosome | B7L8A6                                                                                | HTH-type transcriptional regulator hdfR (H-NS-dependent flhDC regulator)                                               | Escherichia coli (strain 55989 / EAEC)          |
| 36831  | 3279476 | 3279892 TY-2482_chromosome | Q8D1L6                                                                                | Putative uncharacterized protein                                                                                       | Yersinia pestis                                 |
| 98640  | 3281470 | 3279923 TY-2482_chromosome | B7L8A8                                                                                | Putative bifunctional enzyme and transcriptional regulator                                                             | Escherichia coli (strain 55989 / EAEC)          |
| 102074 | 3282031 | 3283674 TY-2482_chromosome | B7L8B0                                                                                | Acetolactate synthase (EC 2.2.1.6)                                                                                     | Escherichia coli (strain 55989 / EAEC)          |
| 86107  | 3283674 | 3283934 TY-2482_chromosome | B7L8A7                                                                                | Acetolactate synthase II, small subunit (EC 2.2.1.6)                                                                   | Escherichia coli (strain 55989 / EAEC)          |
| 61467  | 3283957 | 3284883 TY-2482_chromosome | B7L8B1                                                                                | Branched-chain amino-acid aminotransferase (EC 2.6.1.42)                                                               | Escherichia coli (strain 55989 / EAEC)          |
| 31611  | 3284951 | 3286798 TY-2482_chromosome | B7L8B3                                                                                | Dihydroxy-acid dehydratase (DAD) (EC 4.2.1.9)                                                                          | Escherichia coli (strain 55989 / EAEC)          |
| 94665  | 3286804 | 3288345 TY-2482_chromosome | B7L8B4                                                                                | Threonine deaminase (EC 4.3.1.19)                                                                                      | Escherichia coli (strain 55989 / EAEC)          |
| 76446  | 3289293 | 3288403 TY-2482_chromosome | B7L8B2                                                                                | DNA-binding transcriptional dual regulator                                                                             | Escherichia coli (strain 55989 / EAEC)          |
| 31607  | 3289443 | 3290915 TY-2482_chromosome | B7L8B5                                                                                | Ketol-acid reductoisomerase (EC 1.1.1.86) (Acetohydroxy-acid isomeroreductase) (Alpha-keto-beta-hydroxylacil redu      | Escherichia coli (strain 55989 / EAEC)          |
| 18801  | 3291330 | 3291008 TY-2482_chromosome | E9WNG1                                                                                | Ppic-type ppiase domain-containing protein                                                                             | Escherichia coli E1520                          |
| 108829 | 3291976 | 3291488 TY-2482_chromosome | B7L8B8                                                                                | Putative uncharacterized protein                                                                                       | Escherichia coli (strain 55989 / EAEC)          |
| 95910  | 3292151 | 3294169 TY-2482_chromosome | B7L8B9                                                                                | DNA helicase and single-stranded DNA-dependent ATPase (EC 3.6.1.-)                                                     | Escherichia coli (strain 55989 / EAEC)          |
| 31212  | 3295703 | 3294222 TY-2482_chromosome | B7L8C0                                                                                | Guanosine-5'-triphosphate,3'-diphosphate pyrophosphatase (EC 3.6.1.40) (Guanosine pentaphosphate phosphohydr           | Escherichia coli (strain 55989 / EAEC)          |
| 33372  | 3297102 | 3295840 TY-2482_chromosome | B7L8B6                                                                                | ATP-dependent RNA helicase rHb (EC 3.6.4.13)                                                                           | Escherichia coli (strain 55989 / EAEC)          |
| 28326  | 3297619 | 3297230 TY-2482_chromosome | A1AHV1                                                                                | Putative uncharacterized protein                                                                                       | Escherichia coli O1:K1 / APEC                   |
| 110604 | 3297889 | 3299145 TY-2482_chromosome | B7L8C4                                                                                | Transcription termination factor Rho (EC 3.6.4.-) (ATP-dependent helicase Rho)                                         | Escherichia coli (strain 55989 / EAEC)          |
| 61115  | 3299158 | 3299373 TY-2482_chromosome | B7L8C1                                                                                | Putative uncharacterized protein                                                                                       | Escherichia coli (strain 55989 / EAEC)          |
| 112330 | 3299388 | 3300488 TY-2482_chromosome | B7L8C6                                                                                | UDP-GlucNAc:undecaprenylphosphate GlcNAc-1-phosphate transferase (EC 2.4.1.-)                                          | Escherichia coli (strain 55989 / EAEC)          |

|        |         |                            |                                                                               |                                                                                                                        |                                                  |
|--------|---------|----------------------------|-------------------------------------------------------------------------------|------------------------------------------------------------------------------------------------------------------------|--------------------------------------------------|
| 104495 | 3300503 | 3301546 TY-2482_chromosome | B7L8C7                                                                        | Entobacterial Common Antigen (ECA) polysaccharide chain length modulation protein                                      | Escherichia coli (strain 55989 / EAEC)           |
| 65286  | 3301605 | 3302732 TY-2482_chromosome | B7L8C8                                                                        | UDP-N-acetylglucosamine 2-epimerase (EC 5.1.3.14)                                                                      | Escherichia coli (strain 55989 / EAEC)           |
| 106452 | 3302732 | 3303991 TY-2482_chromosome | B7L8C5                                                                        | UDP-N-acetyl-D-mannosaminuronic acid dehydrogenase (EC 1.1.1.-)                                                        | Escherichia coli (strain 55989 / EAEC)           |
| 113931 | 3303994 | 3305058 TY-2482_chromosome | B7L8D0                                                                        | dTDP-glucose 4,6-dehydratase (EC 4.2.1.46)                                                                             | Escherichia coli (strain 55989 / EAEC)           |
| 113932 | 3305080 | 3305958 TY-2482_chromosome | B7L8D1                                                                        | Glucose-1-phosphate thymidyltransferase (EC 2.7.7.24)                                                                  | Escherichia coli (strain 55989 / EAEC)           |
| 102792 | 3305939 | 3306610 TY-2482_chromosome | B7L8C9                                                                        | TDP-fucosamine acetyltransferase                                                                                       | Escherichia coli (strain 55989 / EAEC)           |
| 68623  | 3306618 | 3307745 TY-2482_chromosome | B7L8D3                                                                        | TDP-4-oxo-6-deoxy-D-glucose transaminase (EC 2.6.1.-)                                                                  | Escherichia coli (strain 55989 / EAEC)           |
| 115289 | 3307750 | 3308997 TY-2482_chromosome | B7L8D4                                                                        | O-antigen translocase                                                                                                  | Escherichia coli (strain 55989 / EAEC)           |
| 34572  | 3308997 | 3310073 TY-2482_chromosome | B7L8D5                                                                        | 4-alpha-L-fucosyltransferase (EC 2.4.1.-) (TDP-Fuc4NAc:lipid II Fuc4NAc transferase)                                   | Escherichia coli (strain 55989 / EAEC)           |
| 34590  | 3310073 | 3311422 TY-2482_chromosome | B7L952                                                                        | Putative ECA polymerase                                                                                                | Escherichia coli (strain 55989 / EAEC)           |
| 34576  | 3311428 | 3312165 TY-2482_chromosome | B7L953                                                                        | Probable UDP-N-acetyl-D-mannosaminuronic acid transferase (UDP-ManNAc transferase) (EC 2.4.1.-)                        | Escherichia coli (strain 55989 / EAEC)           |
| 78657  | 3312359 | 3313741 TY-2482_chromosome | B7L954                                                                        | Putative amino acid transporter                                                                                        | Escherichia coli (strain 55989 / EAEC)           |
| r247   | 3313847 | 3313923 TY-2482_chromosome | ref NC_010473 :4079318-4079394 Arg tRNA  [gene=argX] [locus_tag=ECDH10B_3986] |                                                                                                                        |                                                  |
| r246   | 3313981 | 3314057 TY-2482_chromosome | ref NC_010473 :4079452-4079528 His tRNA  [gene=hisR] [locus_tag=ECDH10B_3987] |                                                                                                                        |                                                  |
| r210   | 3314078 | 3314164 TY-2482_chromosome | ref NC_010473 :4650800-4650886 Leu tRNA  [gene=leuQ] [locus_tag=ECDH10B_4527] |                                                                                                                        |                                                  |
| r245   | 3314207 | 3314283 TY-2482_chromosome | ref NC_010473 :4079678-4079754 Pro tRNA  [gene=proM] [locus_tag=ECDH10B_3989] |                                                                                                                        |                                                  |
| 97848  | 3314430 | 3315662 TY-2482_chromosome | B7L956                                                                        | Regulator of arylsulfatase activity                                                                                    | Escherichia coli (strain 55989 / EAEC)           |
| r109   | 3316335 | 3316506 TY-2482_chromosome | ref NC_010473 :4083375-4083546 -  [gene=ryiA] [locus_tag=ECDH10B_3992]        |                                                                                                                        |                                                  |
| 68832  | 3317785 | 3316592 TY-2482_chromosome | B7L958                                                                        | Putative protoheme IX synthesis protein                                                                                | Escherichia coli (strain 55989 / EAEC)           |
| 70064  | 3318999 | 3317791 TY-2482_chromosome | B7L955                                                                        | Putative uroporphyrinogen III methylase (EC 2.1.1.107)                                                                 | Escherichia coli (strain 55989 / EAEC)           |
| 81071  | 3319761 | 3319024 TY-2482_chromosome | B7L960                                                                        | Uroporphyrinogen III synthase (EC 4.2.1.75)                                                                            | Escherichia coli (strain 55989 / EAEC)           |
| 106311 | 3320714 | 3319761 TY-2482_chromosome | B5YV51                                                                        | Porphobilinogen deaminase (PBG) (EC 2.5.1.61) (Hydroxymethylbilane synthase) (Pre-uroporphyrinogen synthase)           | Escherichia coli O157:H7 (strain EC4115 / EHEC)  |
| 11112  | 3321058 | 3320855 TY-2482_chromosome | D7XDC1                                                                        | Conserved domain protein                                                                                               | Escherichia coli MS 198-1                        |
| 81072  | 3321086 | 3323629 TY-2482_chromosome | B7L961                                                                        | Adenylate cyclase (EC 4.6.1.1)                                                                                         | Escherichia coli (strain 55989 / EAEC)           |
| 66294  | 3325365 | 3324043 TY-2482_chromosome | B7L964                                                                        | Putative uncharacterized protein                                                                                       | Escherichia coli (strain 55989 / EAEC)           |
| 75198  | 3326870 | 3325365 TY-2482_chromosome | B7L965                                                                        | Putative uncharacterized protein                                                                                       | Escherichia coli (strain 55989 / EAEC)           |
| 83231  | 3327762 | 3327211 TY-2482_chromosome | B7L966                                                                        | Putative uncharacterized protein                                                                                       | Escherichia coli (strain 55989 / EAEC)           |
| 104405 | 3328112 | 3328312 TY-2482_chromosome | B7L962                                                                        | Putative lipoprotein                                                                                                   | Escherichia coli (strain 55989 / EAEC)           |
| 30551  | 3328352 | 3329173 TY-2482_chromosome | B7L969                                                                        | Diaminopimelate epimerase (DAP epimerase) (EC 5.1.1.7)                                                                 | Escherichia coli (strain 55989 / EAEC)           |
| 79240  | 3329173 | 3329877 TY-2482_chromosome | B7L970                                                                        | Putative uncharacterized protein yigA                                                                                  | Escherichia coli (strain 55989 / EAEC)           |
| 34595  | 3329877 | 3330770 TY-2482_chromosome | B7L968                                                                        | Tyrosine recombinase xerC                                                                                              | Escherichia coli (strain 55989 / EAEC)           |
| 75157  | 3330773 | 3331486 TY-2482_chromosome | B7L971                                                                        | Putative hydrolase                                                                                                     | Escherichia coli (strain 55989 / EAEC)           |
| 90810  | 3331573 | 3333732 TY-2482_chromosome | B7L973                                                                        | DNA-dependent ATPase I and helicase II (EC 3.6.1.-)                                                                    | Escherichia coli (strain 55989 / EAEC)           |
| 102935 | 3334646 | 3333885 TY-2482_chromosome | B7L974                                                                        | Putative uncharacterized protein yigE                                                                                  | Escherichia coli (strain 55989 / EAEC)           |
| 99194  | 3335016 | 3335963 TY-2482_chromosome | B7L972                                                                        | Magnesium/nickel/cobalt transporter                                                                                    | Escherichia coli (strain 55989 / EAEC)           |
| 99195  | 3336499 | 3336011 TY-2482_chromosome | B7L976                                                                        | Putative uncharacterized protein                                                                                       | Escherichia coli (strain 55989 / EAEC)           |
| 83652  | 3337350 | 3336499 TY-2482_chromosome | B7L977                                                                        | Putative uncharacterized protein                                                                                       | Escherichia coli (strain 55989 / EAEC)           |
| 80955  | 3337474 | 3337674 TY-2482_chromosome | B7L975                                                                        | Putative uncharacterized protein                                                                                       | Escherichia coli (strain 55989 / EAEC)           |
| 78201  | 3338088 | 3337705 TY-2482_chromosome | C6U2V7                                                                        | Predicted protein                                                                                                      | Escherichia coli O157:H7 (strain TW14359 / EHEC) |
| 77482  | 3338260 | 3338619 TY-2482_chromosome | B7L981                                                                        | Putative uncharacterized protein                                                                                       | Escherichia coli (strain 55989 / EAEC)           |
| 94915  | 3339556 | 3338672 TY-2482_chromosome | B7L982                                                                        | Putative chloramphenicol resistance permease                                                                           | Escherichia coli (strain 55989 / EAEC)           |
| 76208  | 3340093 | 3339611 TY-2482_chromosome | D3H4V8                                                                        | Putative uncharacterized protein                                                                                       | Escherichia coli O44:H18 (strain O42 / EAEC)     |
| 59173  | 3340240 | 3341106 TY-2482_chromosome | B7L984                                                                        | Outer membrane phospholipase A (EC 3.1.1.32)                                                                           | Escherichia coli (strain 55989 / EAEC)           |
| 114100 | 3341242 | 3343068 TY-2482_chromosome | B7L985                                                                        | ATP-dependent DNA helicase (EC 3.6.1.-)                                                                                | Escherichia coli (strain 55989 / EAEC)           |
| 97423  | 3343135 | 3343752 TY-2482_chromosome | B7L983                                                                        | Threonine efflux system                                                                                                | Escherichia coli (strain 55989 / EAEC)           |
| 111496 | 3344437 | 3343820 TY-2482_chromosome | B7L987                                                                        | Neutral amino-acid efflux system                                                                                       | Escherichia coli (strain 55989 / EAEC)           |
| 77511  | 3344548 | 3345567 TY-2482_chromosome | B7L988                                                                        | Lysophospholipase L(2) (EC 3.1.1.5)                                                                                    | Escherichia coli (strain 55989 / EAEC)           |
| 108425 | 3345578 | 3346375 TY-2482_chromosome | B7L986                                                                        | Putative hydrolase                                                                                                     | Escherichia coli (strain 55989 / EAEC)           |
| 94229  | 3348194 | 3347244 TY-2482_chromosome | B7L991                                                                        | DNA-binding transcriptional activator, homocysteine-binding                                                            | Escherichia coli (strain 55989 / EAEC)           |
| 84403  | 3348312 | 3350570 TY-2482_chromosome | B7L992                                                                        | 5-methyltetrahydropteroyltriglutamate-homocysteine methyltransferase (EC 2.1.1.14) (Cobalamin-independent met          | Escherichia coli (strain 55989 / EAEC)           |
| 91761  | 3351427 | 3350615 TY-2482_chromosome | B7L989                                                                        | Putative hydrolase                                                                                                     | Escherichia coli (strain 55989 / EAEC)           |
| 59193  | 3351689 | 3352447 TY-2482_chromosome | B7L994                                                                        | Uridine phosphorylase (EC 2.4.2.3)                                                                                     | Escherichia coli (strain 55989 / EAEC)           |
| 66311  | 3352591 | 3354015 TY-2482_chromosome | B7L995                                                                        | Recombination limiting protein                                                                                         | Escherichia coli (strain 55989 / EAEC)           |
| 34433  | 3354113 | 3354865 TY-2482_chromosome | B7L996                                                                        | Ubiquinone/menaquinone biosynthesis methyltransferase ubiE (EC 2.1.1.163) (EC 2.1.1.201) (2-methoxy-6-polyprenyl       | Escherichia coli (strain 55989 / EAEC)           |
| 79171  | 3354882 | 3355484 TY-2482_chromosome | B7L993                                                                        | Putative uncharacterized protein yigP                                                                                  | Escherichia coli (strain 55989 / EAEC)           |
| 34421  | 3355484 | 3357121 TY-2482_chromosome | B7L998                                                                        | Probable ubiquinone biosynthesis protein UbiE                                                                          | Escherichia coli (strain 55989 / EAEC)           |
| 61977  | 3357203 | 3357469 TY-2482_chromosome | B7L997                                                                        | Sec-independent protein translocase protein tatA/E homolog 2                                                           | Escherichia coli (strain 55989 / EAEC)           |
| 73814  | 3357476 | 3357988 TY-2482_chromosome | B7L9A0                                                                        | TatABCE protein translocation system subunit                                                                           | Escherichia coli (strain 55989 / EAEC)           |
| 102675 | 3357994 | 3358767 TY-2482_chromosome | B7L9A1                                                                        | TatABCE protein translocation system subunit                                                                           | Escherichia coli (strain 55989 / EAEC)           |
| 64109  | 3358800 | 3359591 TY-2482_chromosome | B5Y88                                                                         | Deoxyribonuclease TatD (EC 3.1.21.-)                                                                                   | Escherichia coli O157:H7 (strain EC4115 / EHEC)  |
| 70087  | 3360079 | 3359594 TY-2482_chromosome | B7L9A3                                                                        | DNA-binding transcriptional antiterminator                                                                             | Escherichia coli (strain 55989 / EAEC)           |
| 81098  | 3360246 | 3361736 TY-2482_chromosome | B7L9A4                                                                        | 3-octaprenyl-4-hydroxybenzoate carboxy-lyase (EC 4.1.1.-) (Polyprenyl p-hydroxybenzoate decarboxylase)                 | Escherichia coli (strain 55989 / EAEC)           |
| 84404  | 3361785 | 3362483 TY-2482_chromosome | B7L999                                                                        | Flavin reductase (EC 1.5.1.29)                                                                                         | Escherichia coli (strain 55989 / EAEC)           |
| 101925 | 3363841 | 3362681 TY-2482_chromosome | B7L9A6                                                                        | 3-ketoacyl-CoA thiolase (EC 2.3.1.16) (Acetyl-CoA acyltransferase) (Beta-ketothiolase) (Fatty acid oxidation complex s | Escherichia coli (strain 55989 / EAEC)           |

|        |         |                            |                                                                                           |                                                                                                                            |                                                |
|--------|---------|----------------------------|-------------------------------------------------------------------------------------------|----------------------------------------------------------------------------------------------------------------------------|------------------------------------------------|
| 30856  | 3366040 | 3363854 TY-2482_chromosome | B7L9A7                                                                                    | Fatty acid oxidation complex subunit alpha [Includes: Enoyl-CoA hydratase/Delta(3)-cis-Delta(2)-trans-enoyl-CoA isomerase] | Escherichia coli (strain 55989 / EAEC)         |
| 32938  | 3366230 | 3367558 TY-2482_chromosome | B7L9A5                                                                                    | Xaa-Pro dipeptidase (X-Pro dipeptidase) (EC 3.4.13.9) (Imidodipeptidase) (Proline dipeptidase) (Prolidase)                 | Escherichia coli (strain 55989 / EAEC)         |
| 114132 | 3367561 | 3368172 TY-2482_chromosome | B7L9A8                                                                                    | Putative elongation factor                                                                                                 | Escherichia coli (strain 55989 / EAEC)         |
| 114133 | 3368214 | 3369662 TY-2482_chromosome | B7L9A9                                                                                    | Potassium transporter                                                                                                      | Escherichia coli (strain 55989 / EAEC)         |
| 71430  | 3369677 | 3370219 TY-2482_chromosome | B7L9B1                                                                                    | Protoporphyrin oxidase, flavoprotein (EC 1.3.3.4)                                                                          | Escherichia coli (strain 55989 / EAEC)         |
| r51    | 3370600 | 3372141 TY-2482_chromosome | ref NC_010473 :3522988-3524529 16S ribosomal RNA   [gene=rrsD]   [locus_tag=ECDH10B_3453] |                                                                                                                            |                                                |
| 11305  | 3370746 | 3370513 TY-2482_chromosome | E9WNY3                                                                                    | Putative uncharacterized protein                                                                                           | Escherichia coli E1520                         |
| 25826  | 3371721 | 3372038 TY-2482_chromosome | Q57H85                                                                                    | ORF16-lacZ fusion protein                                                                                                  | Salmonella choleraesuis                        |
| r241   | 3372210 | 3372286 TY-2482_chromosome | ref NC_010473 :4134084-4134160 Ile tRNA   [gene=ileT]   [locus_tag=ECDH10B_4041]          |                                                                                                                            |                                                |
| r327   | 3372329 | 3372404 TY-2482_chromosome | ref NC_010473 :4134203-4134278 Ala tRNA   [gene=alaT]   [locus_tag=ECDH10B_4042]          |                                                                                                                            |                                                |
| r3     | 3372588 | 3375491 TY-2482_chromosome | ref NC_010473 :4307762-4310665 23S ribosomal RNA   [gene=rrlE]   [locus_tag=ECDH10B_4198] |                                                                                                                            |                                                |
| 24097  | 3373116 | 3372814 TY-2482_chromosome | Q1R3T8                                                                                    | Putative uncharacterized protein                                                                                           | Escherichia coli (strain UT189 / UPEC)         |
| 13803  | 3374377 | 3374174 TY-2482_chromosome | C1HUN3                                                                                    | Putative uncharacterized protein                                                                                           | Escherichia sp. 3_2_53FAA                      |
| 20479  | 3374906 | 3374454 TY-2482_chromosome | C1HUN1                                                                                    | Cell wall-associated hydrolase (Fragment)                                                                                  | Escherichia sp. 3_2_53FAA                      |
| 22416  | 3375266 | 3374910 TY-2482_chromosome | C1HUN0                                                                                    | Prolipoprotein diacylglycerol transferase (Fragment)                                                                       | Escherichia sp. 3_2_53FAA                      |
| r127   | 3375585 | 3375704 TY-2482_chromosome | ref NC_010473 :4043643-4043762 5S ribosomal RNA   [gene=rrfC]   [locus_tag=ECDH10B_3948]  |                                                                                                                            |                                                |
| 27250  | 3375761 | 3375470 TY-2482_chromosome | Q1R8D8                                                                                    | Putative uncharacterized protein                                                                                           | Escherichia coli (strain UT189 / UPEC)         |
| 89007  | 3376334 | 3375810 TY-2482_chromosome | C8UKB4                                                                                    | Molybdopterin-guanine dinucleotide biosynthesis protein B                                                                  | Escherichia coli O111:H- (strain 11128 / EHEC) |
| 90952  | 3376900 | 3376319 TY-2482_chromosome | B7L9B3                                                                                    | Molybdopterin-guanine dinucleotide biosynthesis protein A                                                                  | Escherichia coli (strain 55989 / EAEC)         |
| 66312  | 3376970 | 3377236 TY-2482_chromosome | B7L9B4                                                                                    | Putative uncharacterized protein yihD                                                                                      | Escherichia coli (strain 55989 / EAEC)         |
| 88377  | 3377316 | 3378299 TY-2482_chromosome | B7L9B0                                                                                    | Putative kinase                                                                                                            | Escherichia coli (strain 55989 / EAEC)         |
| 60861  | 3378319 | 3378942 TY-2482_chromosome | B7L9B6                                                                                    | Thiol:disulfide interchange protein DsbA                                                                                   | Escherichia coli (strain 55989 / EAEC)         |
| 114008 | 3379100 | 3380527 TY-2482_chromosome | B7L9B7                                                                                    | Putative uncharacterized protein yihF                                                                                      | Escherichia coli (strain 55989 / EAEC)         |
| 67805  | 3381503 | 3380574 TY-2482_chromosome | B7L9B8                                                                                    | Putative endonuclease                                                                                                      | Escherichia coli (strain 55989 / EAEC)         |
| 81100  | 3381867 | 3384650 TY-2482_chromosome | B7L9B5                                                                                    | Fused DNA polymerase I 5'->3' exonuclease ; 3'->5' polymerase ; 3'->5' exonuclease (EC 2.7.7.7)                            | Escherichia coli (strain 55989 / EAEC)         |
| r191   | 3384801 | 3384909 TY-2482_chromosome | ref NC_010473 :4146842-4146950 -   [gene=spf]   [locus_tag=ECDH10B_4053]                  |                                                                                                                            |                                                |
| 1418   | 3385685 | 3385038 TY-2482_chromosome | A1A147                                                                                    | Probable GTP-binding protein EngB                                                                                          | Escherichia coli O1:K1 / APEC                  |
| r103   | 3385938 | 3386182 TY-2482_chromosome | ref NC_010473 :4147979-4148223 -   [gene=csrC]   [locus_tag=ECDH10B_4055]                 |                                                                                                                            |                                                |
| 26222  | 3385939 | 3385706 TY-2482_chromosome | B6I4K2                                                                                    | Putative uncharacterized protein                                                                                           | Escherichia coli (strain SE11)                 |
| 34992  | 3386249 | 3386755 TY-2482_chromosome | B7L9B9                                                                                    | Der GTPase-activating protein YihI                                                                                         | Escherichia coli (strain 55989 / EAEC)         |
| 83656  | 3386947 | 3388317 TY-2482_chromosome | B7L9C1                                                                                    | Coproporphyrinogen III oxidase, SAM and NAD(P)H dependent, oxygen-independent                                              | Escherichia coli (strain 55989 / EAEC)         |
| 72623  | 3390141 | 3388735 TY-2482_chromosome | B7L9C2                                                                                    | Fused DNA-binding response regulator in two-component regulatory system with GlnL: response regulator ; sigma54            | Escherichia coli (strain 55989 / EAEC)         |
| 95363  | 3391202 | 3390156 TY-2482_chromosome | B7L9C3                                                                                    | Sensory histidine kinase in two-component regulatory system with GlnG                                                      | Escherichia coli (strain 55989 / EAEC)         |
| 81101  | 3392897 | 3391491 TY-2482_chromosome | B7L9C4                                                                                    | Glutamine synthetase (EC 6.3.1.2)                                                                                          | Escherichia coli (strain 55989 / EAEC)         |
| 65751  | 3393270 | 3395090 TY-2482_chromosome | B7L9C6                                                                                    | GTP-binding protein                                                                                                        | Escherichia coli (strain 55989 / EAEC)         |
| 27109  | 3393298 | 3392879 TY-2482_chromosome | B5BJ09                                                                                    | Putative cytoplasmic protein                                                                                               | Salmonella paratyphi A (strain AKU_12601)      |
| 69226  | 3395310 | 3396017 TY-2482_chromosome | B7L9C7                                                                                    | Putative DNA-binding transcriptional regulator                                                                             | Escherichia coli (strain 55989 / EAEC)         |
| 108560 | 3396028 | 3397005 TY-2482_chromosome | B7L9C5                                                                                    | Putative sugar phosphate isomerase                                                                                         | Escherichia coli (strain 55989 / EAEC)         |
| 58640  | 3397110 | 3398372 TY-2482_chromosome | B7L9C9                                                                                    | Putative transporter                                                                                                       | Escherichia coli (strain 55989 / EAEC)         |
| 62125  | 3399274 | 3398489 TY-2482_chromosome | B7L9C8                                                                                    | Putative DEOR-type transcriptional regulator                                                                               | Escherichia coli (strain 55989 / EAEC)         |
| 61733  | 3400182 | 3401258 TY-2482_chromosome | B7L9D2                                                                                    | Putative oxidoreductase with NAD(P)-binding Rossmann-fold domain, putative 3-hydroxyisobutyrate dehydrogenase              | Escherichia coli (strain 55989 / EAEC)         |
| 68467  | 3400249 | 3399317 TY-2482_chromosome | B7L9D1                                                                                    | Putative sugar kinase (EC 2.7.1.-)                                                                                         | Escherichia coli (strain 55989 / EAEC)         |
| 75621  | 3401286 | 3402170 TY-2482_chromosome | B7L9D0                                                                                    | Putative aldolase yihT (EC 4.1.2.40)                                                                                       | Escherichia coli (strain 55989 / EAEC)         |
| 61379  | 3402206 | 3403213 TY-2482_chromosome | B7L9D4                                                                                    | Putative uncharacterized protein                                                                                           | Escherichia coli (strain 55989 / EAEC)         |
| 106337 | 3403286 | 3404716 TY-2482_chromosome | B7L9D5                                                                                    | Putative transporter                                                                                                       | Escherichia coli (strain 55989 / EAEC)         |
| 95536  | 3404818 | 3406164 TY-2482_chromosome | B7L9D3                                                                                    | Putative transport protein (Shikimate homolog)                                                                             | Escherichia coli (strain 55989 / EAEC)         |
| 88476  | 3406100 | 3407041 TY-2482_chromosome | B7L9D7                                                                                    | Putative uncharacterized protein                                                                                           | Escherichia coli (strain 55989 / EAEC)         |
| 93027  | 3407164 | 3407781 TY-2482_chromosome | D3H517                                                                                    | Phosphatase (EC 3.1.3.-)                                                                                                   | Escherichia coli O44:H18 (strain O42 / EAEC)   |
| 34997  | 3407778 | 3408647 TY-2482_chromosome | B7L9D9                                                                                    | UPF0761 membrane protein yihY                                                                                              | Escherichia coli (strain 55989 / EAEC)         |
| 30680  | 3408647 | 3409081 TY-2482_chromosome | B7L9D6                                                                                    | D-tyrosyl-tRNA(Tyr) deacylase (EC 3.1.-.-)                                                                                 | Escherichia coli (strain 55989 / EAEC)         |
| 87788  | 3409081 | 3410067 TY-2482_chromosome | B7L9E1                                                                                    | Putative acetyltransferase                                                                                                 | Escherichia coli (strain 55989 / EAEC)         |
| 62838  | 3411117 | 3410137 TY-2482_chromosome | B7L9E2                                                                                    | Putative lipase                                                                                                            | Escherichia coli (strain 55989 / EAEC)         |
| 66313  | 3411271 | 3411579 TY-2482_chromosome | B7L9E0                                                                                    | Putative uncharacterized protein                                                                                           | Escherichia coli (strain 55989 / EAEC)         |
| 112987 | 3411583 | 3411870 TY-2482_chromosome | B7L9E4                                                                                    | Putative uncharacterized protein                                                                                           | Escherichia coli (strain 55989 / EAEC)         |
| 67631  | 3412432 | 3412674 TY-2482_chromosome | D3H522                                                                                    | CopG-family DNA-binding protein                                                                                            | Escherichia coli O44:H18 (strain O42 / EAEC)   |
| 45251  | 3412897 | 3413136 TY-2482_chromosome | D8ET41                                                                                    | Toxin-antitoxin system protein                                                                                             | Escherichia coli MS 107-1                      |
| 30923  | 3414398 | 3413472 TY-2482_chromosome | B7L9E7                                                                                    | Protein FdhE                                                                                                               | Escherichia coli (strain 55989 / EAEC)         |
| 102232 | 3415030 | 3414398 TY-2482_chromosome | B7L9E8                                                                                    | Formate dehydrogenase-O, cytochrome b556 subunit                                                                           | Escherichia coli (strain 55989 / EAEC)         |
| 76036  | 3415929 | 3415030 TY-2482_chromosome | B7L9E9                                                                                    | Formate dehydrogenase-O, Fe-S subunit                                                                                      | Escherichia coli (strain 55989 / EAEC)         |
| 110656 | 3418992 | 3415945 TY-2482_chromosome | B7L9E5                                                                                    | Formate dehydrogenase-O, large subunit (EC 1.2.1.2)                                                                        | Escherichia coli (strain 55989 / EAEC)         |
| 30919  | 3419186 | 3420016 TY-2482_chromosome | B7L9F1                                                                                    | Protein FdhD                                                                                                               | Escherichia coli (strain 55989 / EAEC)         |
| 73708  | 3420172 | 3421209 TY-2482_chromosome | B7L9F2                                                                                    | Putative uncharacterized protein yihG                                                                                      | Escherichia coli (strain 55989 / EAEC)         |
| 89945  | 3423010 | 3421265 TY-2482_chromosome | B7L9F0                                                                                    | Putative regulator                                                                                                         | Escherichia coli (strain 55989 / EAEC)         |
| 86183  | 3424080 | 3423013 TY-2482_chromosome | B7L9F4                                                                                    | Putative endo-1,4-beta-glucanase                                                                                           | Escherichia coli (strain 55989 / EAEC)         |

|        |         |                            |        |                                                                                                                    |                                                  |
|--------|---------|----------------------------|--------|--------------------------------------------------------------------------------------------------------------------|--------------------------------------------------|
| 91878  | 3425521 | 3424073 TY-2482_chromosome | B7L9F5 | Fused putative PTS enzymes: IIB component ; IIC component                                                          | Escherichia coli (strain 55989 / EAEC)           |
| 76835  | 3425978 | 3425535 TY-2482_chromosome | B7L9F6 | Enzyme IIA component of PTS                                                                                        | Escherichia coli (strain 55989 / EAEC)           |
| 33353  | 3426605 | 3426294 TY-2482_chromosome | B7L9F7 | L-rhamnose mutarotase (EC 5.1.3.n3) (Rhamnose 1-epimerase) (Type-3 mutarotase)                                     | Escherichia coli (strain 55989 / EAEC)           |
| 33349  | 3427439 | 3426618 TY-2482_chromosome | B7L9F8 | Rhamnose-1-phosphate aldolase (EC 4.1.2.19)                                                                        | Escherichia coli (strain 55989 / EAEC)           |
| 33341  | 3428940 | 3427684 TY-2482_chromosome | B7L9F3 | L-rhamnose isomerase (EC 5.3.1.14)                                                                                 | Escherichia coli (strain 55989 / EAEC)           |
| 33345  | 3430406 | 3428940 TY-2482_chromosome | B7L9G0 | Rhamnulokinase (EC 2.7.1.5) (Rhamnose kinase)                                                                      | Escherichia coli (strain 55989 / EAEC)           |
| 33361  | 3430694 | 3431527 TY-2482_chromosome | B7L9G1 | HTH-type transcriptional activator rhaS (L-rhamnose operon regulatory protein rhaS)                                | Escherichia coli (strain 55989 / EAEC)           |
| 109867 | 3431514 | 3432449 TY-2482_chromosome | B7L9G2 | DNA-binding transcriptional activator, L-rhamnose-binding                                                          | Escherichia coli (strain 55989 / EAEC)           |
| 33369  | 3433483 | 3432452 TY-2482_chromosome | B7L9F9 | L-rhamnose-proton symporter (L-rhamnose-H(+)) transport protein]                                                   | Escherichia coli (strain 55989 / EAEC)           |
| 75078  | 3433762 | 3434385 TY-2482_chromosome | D3GRW3 | Superoxide dismutase (EC 1.15.1.1)                                                                                 | Escherichia coli O44:H18 (strain 042 / EAEC)     |
| 113479 | 3434648 | 3435628 TY-2482_chromosome | C6V0W7 | 2-keto-3-deoxygluconate permease (KDG permease)                                                                    | Escherichia coli O157:H7 (strain TW14359 / EHEC) |
| 72130  | 3435750 | 3436451 TY-2482_chromosome | D3GRW5 | Putative uncharacterized protein                                                                                   | Escherichia coli O44:H18 (strain 042 / EAEC)     |
| 75448  | 3437933 | 3436563 TY-2482_chromosome | B7L9G7 | Sensory histidine kinase in two-component regulatory system with CpxR                                              | Escherichia coli (strain 55989 / EAEC)           |
| 84572  | 3438628 | 3437933 TY-2482_chromosome | B7L9G3 | DNA-binding response regulator in two-component regulatory system with CpxA                                        | Escherichia coli (strain 55989 / EAEC)           |
| 73668  | 3438778 | 3439275 TY-2482_chromosome | B7L8D2 | Periplasmic protein combats stress                                                                                 | Escherichia coli (strain 55989 / EAEC)           |
| 30939  | 3439427 | 3440326 TY-2482_chromosome | B7LA12 | Ferrous-iron efflux pump FieF                                                                                      | Escherichia coli (strain 55989 / EAEC)           |
| 31713  | 3440510 | 3441469 TY-2482_chromosome | B7LA13 | 6-phosphofructokinase (Phosphofructokinase) (EC 2.7.1.11) (Phosphohexokinase)                                      | Escherichia coli (strain 55989 / EAEC)           |
| 19005  | 3441512 | 3441728 TY-2482_chromosome | E1IU15 | Putative uncharacterized protein                                                                                   | Escherichia coli MS 145-7                        |
| 91907  | 3441792 | 3442778 TY-2482_chromosome | B7LA14 | Sulfate transporter subunit ; periplasmic-binding component of ABC superfamily                                     | Escherichia coli (strain 55989 / EAEC)           |
| 30275  | 3442888 | 3443640 TY-2482_chromosome | B7LA15 | CDP-diacylglycerol pyrophosphatase (EC 3.6.1.26) (CDP-diacylglycerol phosphatidylhydrolase) (CDP-diglyceride hydro | Escherichia coli (strain 55989 / EAEC)           |
| 94822  | 3444465 | 3443701 TY-2482_chromosome | B7LA16 | Triosephosphate isomerase (TIM) (EC 5.3.1.1) (Triose-phosphate isomerase)                                          | Escherichia coli (strain 55989 / EAEC)           |
| 95585  | 3445172 | 3444576 TY-2482_chromosome | B7LA11 | Putative uncharacterized protein yiiQ                                                                              | Escherichia coli (strain 55989 / EAEC)           |
| 104788 | 3445273 | 3445710 TY-2482_chromosome | B7LA18 | Putative uncharacterized protein yiiR                                                                              | Escherichia coli (strain 55989 / EAEC)           |
| 91909  | 3445925 | 3446221 TY-2482_chromosome | B7LA19 | Putative uncharacterized protein yiiS                                                                              | Escherichia coli (strain 55989 / EAEC)           |
| 114048 | 3446251 | 3446676 TY-2482_chromosome | B7LA20 | Stress-induced protein                                                                                             | Escherichia coli (strain 55989 / EAEC)           |
| 86941  | 3447430 | 3446687 TY-2482_chromosome | B7LA17 | Ferredoxin-NADP reductase (EC 1.18.1.2)                                                                            | Escherichia coli (strain 55989 / EAEC)           |
| 69400  | 3448537 | 3447530 TY-2482_chromosome | B7LA22 | Fructose 1,6-bisphosphatase II (EC 3.1.3.11)                                                                       | Escherichia coli (strain 55989 / EAEC)           |
| 31168  | 3450181 | 3448676 TY-2482_chromosome | B7LA23 | Glycerol kinase (EC 2.7.1.30) (ATP:glycerol 3-phosphotransferase) (Glycerokinase) (GK)                             | Escherichia coli (strain 55989 / EAEC)           |
| 113402 | 3451049 | 3450207 TY-2482_chromosome | B7LA24 | Glycerol facilitator                                                                                               | Escherichia coli (strain 55989 / EAEC)           |
| 35079  | 3451475 | 3451717 TY-2482_chromosome | B7LA21 | Cell division protein ZapB                                                                                         | Escherichia coli (strain 55989 / EAEC)           |
| 28643  | 3451862 | 3452365 TY-2482_chromosome | A1AIA4 | Putative uncharacterized protein                                                                                   | Escherichia coli O1:K1 / APEC                    |
| 87762  | 3453321 | 3452386 TY-2482_chromosome | B5VZ70 | 1,4-dihydroxy-2-naphthoate octaprenyltransferase (EC 2.5.1.-)                                                      | Escherichia coli O157:H7 (strain EC4115 / EHEC)  |
| 31547  | 3454707 | 3453379 TY-2482_chromosome | B7LA28 | ATP-dependent protease ATPase subunit HslU (Heat shock protein HslU) (Unfoldase HslU)                              | Escherichia coli (strain 55989 / EAEC)           |
| 31551  | 3455247 | 3454720 TY-2482_chromosome | B7LA29 | ATP-dependent protease subunit HslV (EC 3.4.25.2) (Heat shock protein HslV)                                        | Escherichia coli (strain 55989 / EAEC)           |
| 62741  | 3456299 | 3455343 TY-2482_chromosome | B7LA30 | Essential cell division protein                                                                                    | Escherichia coli (strain 55989 / EAEC)           |
| 91255  | 3457416 | 3456394 TY-2482_chromosome | B7LA31 | DNA-binding transcriptional dual regulator                                                                         | Escherichia coli (strain 55989 / EAEC)           |
| 88401  | 3459770 | 3457575 TY-2482_chromosome | B7LA32 | Primosome factor n' (Replication factor Y)                                                                         | Escherichia coli (strain 55989 / EAEC)           |
| 33529  | 3459973 | 3460182 TY-2482_chromosome | B7LA33 | 50S ribosomal protein L31                                                                                          | Escherichia coli (strain 55989 / EAEC)           |
| 59133  | 3460345 | 3464526 TY-2482_chromosome | B7LA34 | RhsB element core protein RshB                                                                                     | Escherichia coli (strain 55989 / EAEC)           |
| 95743  | 3464531 | 3464764 TY-2482_chromosome | C6V0Z8 | Predicted protein                                                                                                  | Escherichia coli O157:H7 (strain TW14359 / EHEC) |
| 75128  | 3465538 | 3465828 TY-2482_chromosome | C8UKJ8 | Conserved predicted protein                                                                                        | Escherichia coli O111:H- (strain 11128 / EHEC)   |
| 14258  | 3465615 | 3464826 TY-2482_chromosome | Q0H058 | IS1N transposase                                                                                                   | Escherichia coli                                 |
| 97634  | 3466367 | 3465763 TY-2482_chromosome | B5VZ79 | Putative uncharacterized protein                                                                                   | Escherichia coli O157:H7 (strain EC4115 / EHEC)  |
| 32275  | 3466744 | 3466430 TY-2482_chromosome | B7LA39 | Met repressor (Met regulon regulatory protein metU)                                                                | Escherichia coli (strain 55989 / EAEC)           |
| 64140  | 3467021 | 3468178 TY-2482_chromosome | B7LA40 | Cystathionine gamma-synthase, PLP-dependent (EC 2.5.1.48)                                                          | Escherichia coli (strain 55989 / EAEC)           |
| 102906 | 3468184 | 3470613 TY-2482_chromosome | B7LA41 | Fused aspartokinase II ; homoserine dehydrogenase II (EC 1.1.1.3) (EC 2.7.2.4)                                     | Escherichia coli (strain 55989 / EAEC)           |
| 105528 | 3470965 | 3471852 TY-2482_chromosome | B7LA42 | Methylenetetrahydrofolate reductase (EC 1.5.1.20)                                                                  | Escherichia coli (strain 55989 / EAEC)           |
| 73624  | 3472184 | 3474361 TY-2482_chromosome | B7LA43 | Catalase-peroxidase (CP) (EC 1.11.1.6) (EC 1.11.1.7) (Peroxidase/catalase)                                         | Escherichia coli (strain 55989 / EAEC)           |
| 94189  | 3474425 | 3475360 TY-2482_chromosome | D3GS01 | Putative membrane protein                                                                                          | Escherichia coli O44:H18 (strain 042 / EAEC)     |
| 77567  | 3476007 | 3475393 TY-2482_chromosome | B7LA45 | Putative uncharacterized protein yijF                                                                              | Escherichia coli (strain 55989 / EAEC)           |
| 68512  | 3477385 | 3476285 TY-2482_chromosome | B7LA46 | Glycerol dehydrogenase, NAD (EC 1.1.1.6)                                                                           | Escherichia coli (strain 55989 / EAEC)           |
| 83730  | 3478058 | 3477399 TY-2482_chromosome | B7LA47 | Probable fructose-6-phosphate aldolase 2 (EC 4.1.2.-)                                                              | Escherichia coli (strain 55989 / EAEC)           |
| 114010 | 3480571 | 3478073 TY-2482_chromosome | B7LA48 | Fused putative PTS enzymes: Hpr component ; enzyme I component ; enzyme IIA component (EC 2.7.1.69) (EC 2.7.3.5)   | Escherichia coli (strain 55989 / EAEC)           |
| 91912  | 3480880 | 3481956 TY-2482_chromosome | B7LA49 | Enzyme IIC component of PTS                                                                                        | Escherichia coli (strain 55989 / EAEC)           |
| 95546  | 3481974 | 3482291 TY-2482_chromosome | B7LA44 | Putative enzyme IIB component of PTS                                                                               | Escherichia coli (strain 55989 / EAEC)           |
| 62677  | 3482345 | 3484639 TY-2482_chromosome | B7LA51 | Putative formate acetyltransferase 2 (Pyruvate formate lyase II)                                                   | Escherichia coli (strain 55989 / EAEC)           |
| 76833  | 3484608 | 3485483 TY-2482_chromosome | B7LA52 | Pyruvate formate lyase II activase                                                                                 | Escherichia coli (strain 55989 / EAEC)           |
| 84587  | 3485488 | 3485826 TY-2482_chromosome | B7LA53 | Enzyme IIB component of PTS (EC 2.7.1.69)                                                                          | Escherichia coli (strain 55989 / EAEC)           |
| 59113  | 3486667 | 3485819 TY-2482_chromosome | B7LA50 | Putative DNA-binding transcriptional regulator                                                                     | Escherichia coli (strain 55989 / EAEC)           |
| 86963  | 3488615 | 3486885 TY-2482_chromosome | B7LA55 | Putative uncharacterized protein yijP                                                                              | Escherichia coli (strain 55989 / EAEC)           |
| 30241  | 3491449 | 3488801 TY-2482_chromosome | B7LA56 | Phosphoenolpyruvate carboxylase (PEPC) (PEPCase) (EC 4.1.1.31)                                                     | Escherichia coli (strain 55989 / EAEC)           |
| 29834  | 3492952 | 3491804 TY-2482_chromosome | B7LA57 | Acetylornithine deacetylase (AO) (Acetylornithinase) (EC 3.5.1.16) (N-acetylornithinase) (NAO)                     | Escherichia coli (strain 55989 / EAEC)           |
| 65421  | 3493106 | 3494107 TY-2482_chromosome | B7LA58 | N-acetyl-gamma-glutamyl-phosphate reductase (AGPRI) (EC 1.2.1.38) (N-acetyl-glutamate semialdehyde dehydrogenase   | Escherichia coli (strain 55989 / EAEC)           |
| 94763  | 3494118 | 3494891 TY-2482_chromosome | C6V122 | Acetylglutamate kinase (EC 2.7.2.8) (N-acetyl-L-glutamate 5-phosphotransferase) (NAG kinase)                       | Escherichia coli O157:H7 (strain TW14359 / EHEC) |

|      |        |         |                            |                                  |                                                                                                                     |                                                          |
|------|--------|---------|----------------------------|----------------------------------|---------------------------------------------------------------------------------------------------------------------|----------------------------------------------------------|
|      | 29855  | 3494955 | 3496325 TY-2482_chromosome | B7LA60                           | Argininosuccinate lyase (ASAL) (EC 4.3.2.1) (Argininosuccinase)                                                     | Escherichia coli (strain 55989 / EAEC)                   |
|      | 62629  | 3496826 | 3498037 TY-2482_chromosome | B7LA61                           | Putative enolase/dehydratase                                                                                        | Escherichia coli (strain 55989 / EAEC)                   |
|      | 114055 | 3498107 | 3499387 TY-2482_chromosome | B7LA59                           | Putative transporter                                                                                                | Escherichia coli (strain 55989 / EAEC)                   |
| r190 |        | 3499545 | 3499436 TY-2482_chromosome | ref NC_010473 :4256005-4256114 - | [gene=oxyS] [locus_tag=ECDH10B_4149]                                                                                |                                                          |
|      | 99032  | 3499641 | 3500555 TY-2482_chromosome | B7LA63                           | DNA-binding transcriptional dual regulator                                                                          | Escherichia coli (strain 55989 / EAEC)                   |
|      | 34027  | 3501941 | 3500544 TY-2482_chromosome | B7LA64                           | Soluble pyridine nucleotide transhydrogenase (STH) (EC 1.6.1.1) (NAD(P)(+) transhydrogenase [B-specific])           | Escherichia coli (strain 55989 / EAEC)                   |
|      | 70017  | 3502218 | 3502919 TY-2482_chromosome | B7LA62                           | DNA-binding transcriptional repressor                                                                               | Escherichia coli (strain 55989 / EAEC)                   |
|      | 102908 | 3502922 | 3503278 TY-2482_chromosome | B7LA66                           | Putative uncharacterized protein yijD                                                                               | Escherichia coli (strain 55989 / EAEC)                   |
|      | 34323  | 3504421 | 3503324 TY-2482_chromosome | B7LA67                           | tRNA (uracil-5)-methyltransferase (EC 2.1.1.35) (tRNA(M-5-U54)-methyltransferase) (RUMT)                            | Escherichia coli (strain 55989 / EAEC)                   |
|      | 110404 | 3504790 | 3506631 TY-2482_chromosome | B7LA68                           | Vitamin B12/cobalamin outer membrane transporter                                                                    | Escherichia coli (strain 55989 / EAEC)                   |
|      | 32558  | 3506579 | 3507433 TY-2482_chromosome | B7LA65                           | Glutamate racemase (EC 5.1.1.3)                                                                                     | Escherichia coli (strain 55989 / EAEC)                   |
| r52  |        | 3507810 | 3509351 TY-2482_chromosome | ref NC_010473 :3522988-3524529   | 16S ribosomal RNA [gene=rrsD] [locus_tag=ECDH10B_3453]                                                              |                                                          |
|      | 11303  | 3507956 | 3507723 TY-2482_chromosome | E9WNY3                           | Putative uncharacterized protein                                                                                    | Escherichia coli E1520                                   |
|      | 25828  | 3508931 | 3509248 TY-2482_chromosome | Q57H85                           | ORF16-lacZ fusion protein                                                                                           | Salmonella choleraesuis                                  |
| r242 |        | 3509420 | 3509496 TY-2482_chromosome | ref NC_010473 :4134084-4134160   | Ile tRNA [gene=ileT] [locus_tag=ECDH10B_4041]                                                                       |                                                          |
| r328 |        | 3509539 | 3509614 TY-2482_chromosome | ref NC_010473 :4134203-4134278   | Ala tRNA [gene=alaT] [locus_tag=ECDH10B_4042]                                                                       |                                                          |
| r5   |        | 3509798 | 3512701 TY-2482_chromosome | ref NC_010473 :4307762-4310665   | 23S ribosomal RNA [gene=rrlE] [locus_tag=ECDH10B_4198]                                                              |                                                          |
|      | 24096  | 3510326 | 3510024 TY-2482_chromosome | Q1R3T8                           | Putative uncharacterized protein                                                                                    | Escherichia coli (strain UT189 / UPEC)                   |
|      | 13798  | 3511587 | 3511384 TY-2482_chromosome | C1HUN3                           | Putative uncharacterized protein                                                                                    | Escherichia sp. 3_2_53FAA                                |
|      | 20475  | 3512116 | 3511664 TY-2482_chromosome | C1HUN1                           | Cell wall-associated hydrolase (Fragment)                                                                           | Escherichia sp. 3_2_53FAA                                |
|      | 22414  | 3512476 | 3512120 TY-2482_chromosome | C1HUN0                           | Prolipoprotein diacylglycerol transferase (Fragment)                                                                | Escherichia sp. 3_2_53FAA                                |
| r129 |        | 3512795 | 3512914 TY-2482_chromosome | ref NC_010473 :4043643-4043762   | 5S ribosomal RNA [gene=rrfC] [locus_tag=ECDH10B_3948]                                                               |                                                          |
|      | 19524  | 3513082 | 3512759 TY-2482_chromosome | C5WBP6                           | Ybl209                                                                                                              | Escherichia coli (strain B / BL21)                       |
|      | 76152  | 3513215 | 3514240 TY-2482_chromosome | B7LA70                           | UDP-N-acetylenolpyruvoylglucosamine reductase (EC 1.1.1.158) (UDP-N-acetylmuramate dehydrogenase)                   | Escherichia coli (strain 55989 / EAEC)                   |
|      | 99145  | 3514240 | 3515202 TY-2482_chromosome | B7LA71                           | Bifunctional biotin-[acetylCoA carboxylase] holoenzyme synthetase and DNA-binding transcriptional repressor, bio-5' | Escherichia coli (strain 55989 / EAEC)                   |
|      | 80784  | 3516167 | 3516358 TY-2482_chromosome | B52075                           | Putative uncharacterized protein                                                                                    | Escherichia coli O157:H7 (strain EC4115 / EHEC)          |
|      | 30358  | 3516184 | 3515237 TY-2482_chromosome | B7LA72                           | Pantothenate kinase (EC 2.7.1.33) (Pantothenic acid kinase)                                                         | Escherichia coli (strain 55989 / EAEC)                   |
| r323 |        | 3516546 | 3516621 TY-2482_chromosome | ref NC_010473 :4273107-4273182   | Thr tRNA [gene=thrU] [locus_tag=ECDH10B_4164]                                                                       |                                                          |
| r229 |        | 3516630 | 3516714 TY-2482_chromosome | ref NC_010473 :4273191-4273275   | Tyr tRNA [gene=tyrU] [locus_tag=ECDH10B_4165]                                                                       |                                                          |
| r476 |        | 3516831 | 3516905 TY-2482_chromosome | ref NC_010473 :4273392-4273466   | Gly tRNA [gene=glyT] [locus_tag=ECDH10B_4166]                                                                       |                                                          |
| r321 |        | 3516912 | 3516987 TY-2482_chromosome | ref NC_010473 :4273473-4273548   | Thr tRNA [gene=thrT] [locus_tag=ECDH10B_4167]                                                                       |                                                          |
|      | 61645  | 3517102 | 3518283 TY-2482_chromosome | B7LA73                           | Elongation factor Tu 2 (EF-Tu 2)                                                                                    | Escherichia coli (strain 55989 / EAEC)                   |
|      | 61969  | 3518516 | 3518896 TY-2482_chromosome | B7LA69                           | Preprotein translocase membrane subunit                                                                             | Escherichia coli (strain 55989 / EAEC)                   |
|      | 113097 | 3518901 | 3519443 TY-2482_chromosome | B7LA75                           | Transcription antitermination protein nusG                                                                          | Escherichia coli (strain 55989 / EAEC)                   |
|      | 25342  | 3520552 | 3519554 TY-2482_chromosome | A1AIF6                           | Putative uncharacterized protein                                                                                    | Escherichia coli O1:K1 / APEC                            |
|      | 16023  | 3520864 | 3520673 TY-2482_chromosome | D6JHU1                           | Putative uncharacterized protein (Fragment)                                                                         | Escherichia coli B354                                    |
|      | 33452  | 3521154 | 3521648 TY-2482_chromosome | B7LA78                           | 50S ribosomal protein L10                                                                                           | Escherichia coli (strain 55989 / EAEC)                   |
|      | 24697  | 3522209 | 3521706 TY-2482_chromosome | E1PAV1                           | 50S ribosomal protein L7/L12                                                                                        | Escherichia coli OR:K5:H- (strain ABU 83972)             |
|      | 33667  | 3522403 | 3526428 TY-2482_chromosome | B7LA80                           | DNA-directed RNA polymerase subunit beta (RNAP subunit beta) (EC 2.7.7.6) (RNA polymerase subunit beta) (Transcr    | Escherichia coli (strain 55989 / EAEC)                   |
|      | 62124  | 3526508 | 3530728 TY-2482_chromosome | B7LA76                           | DNA-directed RNA polymerase (EC 2.7.7.6)                                                                            | Escherichia coli (strain 55989 / EAEC)                   |
|      | 70018  | 3530944 | 3531480 TY-2482_chromosome | B7LA82                           | Heat shock protein                                                                                                  | Escherichia coli (strain 55989 / EAEC)                   |
|      | 91916  | 3533026 | 3531896 TY-2482_chromosome | B7LA83                           | Thiamin biosynthesis ThiGH complex subunit                                                                          | Escherichia coli (strain 55989 / EAEC)                   |
|      | 82508  | 3533838 | 3533026 TY-2482_chromosome | B52086                           | Thiazole synthase (EC 4.-.-.-)                                                                                      | Escherichia coli O157:H7 (strain EC4115 / EHEC)          |
|      | 99146  | 3533995 | 3533798 TY-2482_chromosome | B7LA81                           | Sulphur carrier protein                                                                                             | Escherichia coli (strain 55989 / EAEC)                   |
|      | 91917  | 3534734 | 3533982 TY-2482_chromosome | B7LA86                           | Thiamin (Thiazole moiety) biosynthesis protein (EC 2.7.7.-)                                                         | Escherichia coli (strain 55989 / EAEC)                   |
|      | 72895  | 3535362 | 3534730 TY-2482_chromosome | B7LA87                           | Thiamine-phosphate pyrophosphorylase (TMP pyrophosphorylase) (EC 2.5.1.3) (Thiamine-phosphate sy                    | Escherichia coli (strain 55989 / EAEC)                   |
|      | 34244  | 3537257 | 3535365 TY-2482_chromosome | B7LA88                           | Phosphomethylpyrimidine synthase (EC 4.-.-.-) (Hydroxymethylpyrimidine phosphate synthase) (HMP-P synthase) (H      | Escherichia coli (strain 55989 / EAEC)                   |
|      | 33774  | 3537966 | 3537493 TY-2482_chromosome | B7LA89                           | Regulator of sigma D                                                                                                | Escherichia coli (strain 55989 / EAEC)                   |
|      | 32727  | 3538061 | 3538831 TY-2482_chromosome | B7LA85                           | NADH pyrophosphatase (EC 3.6.1.22)                                                                                  | Escherichia coli (strain 55989 / EAEC)                   |
|      | 35069  | 3538874 | 3539935 TY-2482_chromosome | B7LA91                           | Uroporphyrinogen decarboxylase (UPD) (URO-D) (EC 4.1.1.37)                                                          | Escherichia coli (strain 55989 / EAEC)                   |
|      | 32647  | 3539948 | 3540616 TY-2482_chromosome | B7LA92                           | Endonuclease V (EC 3.1.21.7) (Deoxyinosine 3' endonuclease) (Deoxyribonuclease V) (DNase V,                         | Escherichia coli (strain 55989 / EAEC)                   |
|      | 95600  | 3540662 | 3541249 TY-2482_chromosome | B7LA93                           | Putative uncharacterized protein yjaG                                                                               | Escherichia coli (strain 55989 / EAEC)                   |
|      | 62775  | 3541439 | 3541708 TY-2482_chromosome | B7LA94                           | HU, DNA-binding transcriptional regulator, alpha subunit                                                            | Escherichia coli (strain 55989 / EAEC)                   |
|      | 115730 | 3541718 | 3542416 TY-2482_chromosome | D3GSY0                           | Putative uncharacterized protein                                                                                    | Escherichia coli O44:H18 (strain O42 / EAEC)             |
|      | 25327  | 3542987 | 3542424 TY-2482_chromosome | B2TWI9                           | Zinc resistance-associated protein                                                                                  | Shigella boydii serotype 18 (strain CDC 3083-94 / BS512) |
|      | 79101  | 3543084 | 3544457 TY-2482_chromosome | B7LAV0                           | Sensory histidine kinase in two-component regulatory system with ZraR                                               | Escherichia coli (strain 55989 / EAEC)                   |
|      | 102923 | 3544457 | 3545779 TY-2482_chromosome | B7LAV9                           | Fused DNA-binding response regulator in two-component regulatory system with ZraS: response regulator ; sigma54     | Escherichia coli (strain 55989 / EAEC)                   |
|      | 62808  | 3547068 | 3545782 TY-2482_chromosome | B7LAV2                           | Phosphoribosylglycinamide synthetase phosphoribosylamine-glycine ligase (EC 6.3.4.13)                               | Escherichia coli (strain 55989 / EAEC)                   |
|      | 33151  | 3548669 | 3547083 TY-2482_chromosome | B7LAV3                           | Bifunctional purine biosynthesis protein purH [Includes: Phosphoribosylaminoimidazolecarboxamide formyltransfera    | Escherichia coli (strain 55989 / EAEC)                   |
|      | 11538  | 3548945 | 3548745 TY-2482_chromosome | D6JHW4                           | Putative uncharacterized protein                                                                                    | Escherichia coli B354                                    |
| r53  |        | 3549284 | 3550825 TY-2482_chromosome | ref NC_010473 :3522988-3524529   | 16S ribosomal RNA [gene=rrsD] [locus_tag=ECDH10B_3453]                                                              |                                                          |
|      | 11302  | 3549430 | 3549197 TY-2482_chromosome | E9WNY3                           | Putative uncharacterized protein                                                                                    | Escherichia coli E1520                                   |
|      | 25829  | 3550405 | 3550722 TY-2482_chromosome | Q57H85                           | ORF16-lacZ fusion protein                                                                                           | Salmonella choleraesuis                                  |
| r243 |        | 3550894 | 3550970 TY-2482_chromosome | ref NC_010473 :4134084-4134160   | Ile tRNA [gene=ileT] [locus_tag=ECDH10B_4041]                                                                       |                                                          |

|        |         |                            |                                                                                                                        |                                                   |
|--------|---------|----------------------------|------------------------------------------------------------------------------------------------------------------------|---------------------------------------------------|
| r329   | 3551013 | 3551088 TY-2482_chromosome | ref NC_010473 :4134203-4134278 Ala tRNA [gene=alaT] [locus_tag=ECDH10B_4042                                            |                                                   |
| r6     | 3551272 | 3554175 TY-2482_chromosome | ref NC_010473 :4307762-4310665 23S ribosomal RNA [gene=rrlE] [locus_tag=ECDH10B_4198                                   |                                                   |
| 24095  | 3551800 | 3551498 TY-2482_chromosome | Q1R3T8 Putative uncharacterized protein                                                                                | Escherichia coli (strain UT189 / UPEC)            |
| 13804  | 3553061 | 3552858 TY-2482_chromosome | C1HUN3 Putative uncharacterized protein                                                                                | Escherichia sp. 3_2_53FAA                         |
| 20474  | 3553590 | 3553138 TY-2482_chromosome | C1HUN1 Cell wall-associated hydrolase (Fragment)                                                                       | Escherichia sp. 3_2_53FAA                         |
| 22413  | 3553950 | 3553594 TY-2482_chromosome | C1HUN0 Prolipoprotein diacylglycerol transferase (Fragment)                                                            | Escherichia sp. 3_2_53FAA                         |
| r130   | 3554269 | 3554388 TY-2482_chromosome | ref NC_010473 :4043643-4043762 5S ribosomal RNA [gene=rrfC] [locus_tag=ECDH10B_3948                                    |                                                   |
| 27249  | 3554478 | 3554154 TY-2482_chromosome | Q1R8D8 Putative uncharacterized protein                                                                                | Escherichia coli (strain UT189 / UPEC)            |
| 77460  | 3554947 | 3554507 TY-2482_chromosome | B7LAV4 Putative acetyltransferase                                                                                      | Escherichia coli (strain 55989 / EAEC)            |
| 32266  | 3555104 | 3556030 TY-2482_chromosome | B7LAV1 Homoserine O-succinyltransferase (EC 2.3.1.46) (Homoserine O-transsuccinylase) (HTS)                            | Escherichia coli (strain 55989 / EAEC)            |
| 72896  | 3556302 | 3557900 TY-2482_chromosome | B7LAV5 Malate synthase (EC 2.3.3.9)                                                                                    | Escherichia coli (strain 55989 / EAEC)            |
| 102915 | 3557933 | 3559234 TY-2482_chromosome | B7LAV7 Isocitrate lyase (EC 4.1.3.1)                                                                                   | Escherichia coli (strain 55989 / EAEC)            |
| 27951  | 3559306 | 3559539 TY-2482_chromosome | A7ZUM9 Putative uncharacterized protein                                                                                | Escherichia coli O139:H28 (strain E24377A / ETEC) |
| 29686  | 3559518 | 3561251 TY-2482_chromosome | B7LAV8 Isocitrate dehydrogenase kinase/phosphatase (IDH kinase/phosphatase) (IDHK/P) (EC 2.7.11.5) (EC 3.1.3.-)        | Escherichia coli (strain 55989 / EAEC)            |
| 116140 | 3562797 | 3561226 TY-2482_chromosome | C8UKR4 T3SS effector-like protein EspL-homolog                                                                         | Escherichia coli O111:H- (strain 11128 / EHEC)    |
| 87831  | 3563938 | 3563117 TY-2482_chromosome | B7LAV9 DNA-binding transcriptional repressor                                                                           | Escherichia coli (strain 55989 / EAEC)            |
| 101837 | 3564138 | 3567818 TY-2482_chromosome | B7LAW1 Homocysteine-N5-methyltetrahydrofolate transmethylase, B12-dependent (EC 2.1.1.13)                              | Escherichia coli (strain 55989 / EAEC)            |
| 64098  | 3568041 | 3569669 TY-2482_chromosome | B7LAW2 Putative transporter                                                                                            | Escherichia coli (strain 55989 / EAEC)            |
| 32934  | 3570452 | 3569766 TY-2482_chromosome | B7LAW3 Peptidase E (EC 3.4.13.21) (Alpha-aspartyl dipeptidase) (Asp-specific dipeptidase) (Dipeptidase E)              | Escherichia coli (strain 55989 / EAEC)            |
| 94907  | 3570664 | 3571533 TY-2482_chromosome | B7LAW0 Pseudouridine synthase (EC 5.4.99.-)                                                                            | Escherichia coli (strain 55989 / EAEC)            |
| 110422 | 3571809 | 3571540 TY-2482_chromosome | B7LAW5 Putative uncharacterized protein yjbD                                                                           | Escherichia coli (strain 55989 / EAEC)            |
| 21516  | 3572327 | 3572133 TY-2482_chromosome | D8EA79 Putative uncharacterized protein                                                                                | Escherichia coli MS 119-7                         |
| 112313 | 3572338 | 3573462 TY-2482_chromosome | B7LAW6 Putative uncharacterized protein                                                                                | Escherichia coli (strain 55989 / EAEC)            |
| 110423 | 3573462 | 3574259 TY-2482_chromosome | B7LAW7 Putative uncharacterized protein                                                                                | Escherichia coli (strain 55989 / EAEC)            |
| 73749  | 3575230 | 3574301 TY-2482_chromosome | B7LAW4 Putative zeta toxin; poison-antidote element                                                                    | Escherichia coli (strain 55989 / EAEC)            |
| 114078 | 3576718 | 3575372 TY-2482_chromosome | B7LAW9 Aspartokinase (EC 2.7.2.4)                                                                                      | Escherichia coli (strain 55989 / EAEC)            |
| 31059  | 3577243 | 3578889 TY-2482_chromosome | B7LAX0 Glucose-6-phosphate isomerase (GPI) (EC 5.3.1.9) (Phosphoglucose isomerase) (PGI) (Phosphohexose isomerase) (PH | Escherichia coli (strain 55989 / EAEC)            |
| 24900  | 3579518 | 3579231 TY-2482_chromosome | B7MRF8 Putative uncharacterized protein                                                                                | Escherichia coli O81 (strain ED1a)                |
| 72276  | 3579603 | 3580238 TY-2482_chromosome | B7LAX2 Putative lipoprotein                                                                                            | Escherichia coli (strain 55989 / EAEC)            |
| 110424 | 3580238 | 3580972 TY-2482_chromosome | B7LAW8 Putative uncharacterized protein yjbG                                                                           | Escherichia coli (strain 55989 / EAEC)            |
| 114014 | 3580975 | 3583068 TY-2482_chromosome | B7LAX4 Putative porin                                                                                                  | Escherichia coli (strain 55989 / EAEC)            |
| 68714  | 3583396 | 3583121 TY-2482_chromosome | B7LAX6 Putative uncharacterized protein                                                                                | Escherichia coli (strain 55989 / EAEC)            |
| 33102  | 3583666 | 3584073 TY-2482_chromosome | B7LAX3 Protein psiE                                                                                                    | Escherichia coli (strain 55989 / EAEC)            |
| 80070  | 3585595 | 3584123 TY-2482_chromosome | B7LAX8 D-xylose transporter                                                                                            | Escherichia coli (strain 55989 / EAEC)            |
| 97490  | 3586857 | 3585970 TY-2482_chromosome | B7LAX9 Maltose transporter subunit; membrane component of ABC superfamily                                              | Escherichia coli (strain 55989 / EAEC)            |
| 107974 | 3588416 | 3586875 TY-2482_chromosome | B7LAX7 Maltose transporter subunit; membrane component of ABC superfamily                                              | Escherichia coli (strain 55989 / EAEC)            |
| 106531 | 3589760 | 3588573 TY-2482_chromosome | B7LAY1 Maltose transporter subunit; periplasmic-binding component of ABC superfamily                                   | Escherichia coli (strain 55989 / EAEC)            |
| 68595  | 3590125 | 3591237 TY-2482_chromosome | B7LAY2 Fused maltose transport subunit, ATP-binding component of ABC superfamily; regulatory protein                   | Escherichia coli (strain 55989 / EAEC)            |
| 31816  | 3591312 | 3592649 TY-2482_chromosome | B7LAY3 Maltoporin (Maltose-inducible porin)                                                                            | Escherichia coli (strain 55989 / EAEC)            |
| 67705  | 3592804 | 3593721 TY-2482_chromosome | B7LAY4 Maltose regulon periplasmic protein                                                                             | Escherichia coli (strain 55989 / EAEC)            |
| 70060  | 3594205 | 3595530 TY-2482_chromosome | B7LAY0 Putative uncharacterized protein yjbI                                                                           | Escherichia coli (strain 55989 / EAEC)            |
| 34425  | 3595756 | 3596250 TY-2482_chromosome | B7LAY7 Chorismate--pyruvate lyase (CL) (CPL) (EC 4.1.3.40)                                                             | Escherichia coli (strain 55989 / EAEC)            |
| 34417  | 3596266 | 3597135 TY-2482_chromosome | B7LAY8 4-hydroxybenzoate octaprenyltransferase (EC 2.5.1.-) (4-HB polyprenyltransferase)                               | Escherichia coli (strain 55989 / EAEC)            |
| 33009  | 3599716 | 3597296 TY-2482_chromosome | B7LAY9 Glycerol-3-phosphate acyltransferase (GPAT) (EC 2.3.1.15)                                                       | Escherichia coli (strain 55989 / EAEC)            |
| 60467  | 3599887 | 3600252 TY-2482_chromosome | B7LAY6 Diacylglycerol kinase (EC 2.7.1.107)                                                                            | Escherichia coli (strain 55989 / EAEC)            |
| 31873  | 3600365 | 3600970 TY-2482_chromosome | B7LA20 LexA repressor (EC 3.4.21.88)                                                                                   | Escherichia coli (strain 55989 / EAEC)            |
| 84612  | 3600992 | 3602389 TY-2482_chromosome | B7LA22 DNA-damage-inducible SOS response protein                                                                       | Escherichia coli (strain 55989 / EAEC)            |
| 71280  | 3602482 | 3602694 TY-2482_chromosome | D3GT26 Putative general stress response protein                                                                        | Escherichia coli O44:H18 (strain 042 / EAEC)      |
| 66282  | 3603254 | 3602742 TY-2482_chromosome | B7LAZ1 DNA-binding transcriptional repressor, Zn(II)-binding                                                           | Escherichia coli (strain 55989 / EAEC)            |
| 20878  | 3603572 | 3604560 TY-2482_chromosome | D6I3T6 YjbM protein                                                                                                    | Escherichia coli B088                             |
| 112870 | 3604927 | 3605961 TY-2482_chromosome | B7LAZ7 tRNA-dihydrouridine synthase (EC 1.-.-.-)                                                                       | Escherichia coli (strain 55989 / EAEC)            |
| 80273  | 3605888 | 3606337 TY-2482_chromosome | B7LAZ8 Putative uncharacterized protein yjbO                                                                           | Escherichia coli (strain 55989 / EAEC)            |
| 73750  | 3607489 | 3606509 TY-2482_chromosome | B7LAZ9 Quinone oxidoreductase, NADPH-dependent (EC 1.6.5.5)                                                            | Escherichia coli (strain 55989 / EAEC)            |
| 95547  | 3607572 | 3608984 TY-2482_chromosome | B7LB00 Replicative DNA helicase (EC 3.6.1.-)                                                                           | Escherichia coli (strain 55989 / EAEC)            |
| 76396  | 3609040 | 3610116 TY-2482_chromosome | B7LB01 Alanine racemase 2 (EC 5.1.1.1)                                                                                 | Escherichia coli (strain 55989 / EAEC)            |
| 106532 | 3610372 | 3611562 TY-2482_chromosome | B7LA26 Tyrosine aminotransferase, tyrosine-repressible, PLP-dependent (EC 2.6.1.57)                                    | Escherichia coli (strain 55989 / EAEC)            |
| 75619  | 3612329 | 3611790 TY-2482_chromosome | B7LB03 Putative uncharacterized protein                                                                                | Escherichia coli (strain 55989 / EAEC)            |
| 28638  | 3612452 | 3613402 TY-2482_chromosome | Q0XSX2 Diadenosine tetraphosphatase                                                                                    | Shigella flexneri serotype 5b (strain 8401)       |
| 106534 | 3613516 | 3613929 TY-2482_chromosome | B7LB05 Putative uncharacterized protein yjbQ                                                                           | Escherichia coli (strain 55989 / EAEC)            |
| 93928  | 3613936 | 3614289 TY-2482_chromosome | B7LB06 Putative uncharacterized protein yjbR                                                                           | Escherichia coli (strain 55989 / EAEC)            |
| 61544  | 3617149 | 3614330 TY-2482_chromosome | B7LB07 ATPase and DNA damage recognition protein of nucleotide excision repair excinuclease UvrABC                     | Escherichia coli (strain 55989 / EAEC)            |
| 91268  | 3617403 | 3617936 TY-2482_chromosome | B7LB08 Single-stranded DNA-binding protein                                                                             | Escherichia coli (strain 55989 / EAEC)            |
| 71515  | 3618418 | 3618041 TY-2482_chromosome | D3GT41 Putative membrane protein                                                                                       | Escherichia coli O44:H18 (strain 042 / EAEC)      |
| 76063  | 3618749 | 3620332 TY-2482_chromosome | B7LB02 Putative signal transduction protein [EAL domain containing protein]                                            | Escherichia coli (strain 55989 / EAEC)            |



|        |         |                            |                                                                        |                                                                                                                   |                                                |
|--------|---------|----------------------------|------------------------------------------------------------------------|-------------------------------------------------------------------------------------------------------------------|------------------------------------------------|
| 88430  | 3620661 | 3620341 TY-2482_chromosome | B7LB11                                                                 | DNA-binding transcriptional dual regulator                                                                        | Escherichia coli (strain 55989 / EAEC)         |
| 67933  | 3620747 | 3621208 TY-2482_chromosome | B7LB12                                                                 | DNA-binding transcriptional dual regulator, Fe-S center for redox-sensing                                         | Escherichia coli (strain 55989 / EAEC)         |
| 60279  | 3621198 | 3621461 TY-2482_chromosome | D3GT45                                                                 | Putative uncharacterized protein                                                                                  | Escherichia coli O44:H18 (strain 042 / EAEC)   |
| r120   | 3621344 | 3621205 TY-2482_chromosome | ref NC_010473 :4375646-4375785 -  [gene=ryjA] [locus_tag=ECDH10B_4253] |                                                                                                                   |                                                |
| 27742  | 3621641 | 3621853 TY-2482_chromosome | Q8FAZ7                                                                 | Putative uncharacterized protein                                                                                  | Escherichia coli O6                            |
| 28572  | 3621720 | 3621505 TY-2482_chromosome | B6I5T1                                                                 | Putative uncharacterized protein                                                                                  | Escherichia coli (strain SE11)                 |
| 66284  | 3621757 | 3623103 TY-2482_chromosome | B7LB13                                                                 | Putative permease                                                                                                 | Escherichia coli (strain 55989 / EAEC)         |
| 110426 | 3623257 | 3624903 TY-2482_chromosome | B7LB10                                                                 | Putative cation/proton antiporter                                                                                 | Escherichia coli (strain 55989 / EAEC)         |
| 69912  | 3626352 | 3625063 TY-2482_chromosome | B7LB15                                                                 | Putative uncharacterized protein yjcF                                                                             | Escherichia coli (strain 55989 / EAEC)         |
| 29710  | 3628179 | 3626533 TY-2482_chromosome | B7LB16                                                                 | Cation/acetate symporter ActP (Acetate permease) (Acetate transporter ActP)                                       | Escherichia coli (strain 55989 / EAEC)         |
| 115166 | 3628490 | 3628179 TY-2482_chromosome | B7LB17                                                                 | Putative uncharacterized protein yjcH                                                                             | Escherichia coli (strain 55989 / EAEC)         |
| 68037  | 3630648 | 3628693 TY-2482_chromosome | B7LB14                                                                 | Acetyl-coenzyme A synthetase (EC 6.2.1.1) (Acetate--CoA ligase) (Acyl-activating enzyme)                          | Escherichia coli (strain 55989 / EAEC)         |
| 32718  | 3631040 | 3632521 TY-2482_chromosome | B7LB19                                                                 | Cytochrome c-552 (EC 1.7.2.2) (Ammonia-forming cytochrome c nitrite reductase) (Cytochrome c nitrite reductase)   | Escherichia coli (strain 55989 / EAEC)         |
| 87879  | 3632569 | 3633132 TY-2482_chromosome | B7LB20                                                                 | Nitrite reductase, formate-dependent, penta-heme cytochrome c (EC 1.7.2.2)                                        | Escherichia coli (strain 55989 / EAEC)         |
| 80514  | 3633132 | 3633800 TY-2482_chromosome | B7LB21                                                                 | Formate-dependent nitrite reductase, 4Fe4S subunit                                                                | Escherichia coli (strain 55989 / EAEC)         |
| 66288  | 3633800 | 3634753 TY-2482_chromosome | B7LB18                                                                 | Formate-dependent nitrite reductase, membrane subunit                                                             | Escherichia coli (strain 55989 / EAEC)         |
| 59155  | 3634836 | 3636491 TY-2482_chromosome | B7LB23                                                                 | Heme lyase (NrfEFG) for insertion of heme into c552, subunit NrfI                                                 | Escherichia coli (strain 55989 / EAEC)         |
| 87160  | 3636487 | 3636867 TY-2482_chromosome | B7LB22                                                                 | Heme lyase (NrfEFG) for insertion of heme into c552, subunit NrfH                                                 | Escherichia coli (strain 55989 / EAEC)         |
| 77432  | 3636867 | 3637460 TY-2482_chromosome | B7LB25                                                                 | Heme lyase (NrfEFG) for insertion of heme into c552, subunit NrfC                                                 | Escherichia coli (strain 55989 / EAEC)         |
| 91849  | 3637805 | 3639115 TY-2482_chromosome | B7LB26                                                                 | Glutamate/aspartate:proton symporter                                                                              | Escherichia coli (strain 55989 / EAEC)         |
| 101200 | 3639885 | 3639199 TY-2482_chromosome | B7LB27                                                                 | Putative uncharacterized protein yjcO                                                                             | Escherichia coli (strain 55989 / EAEC)         |
| 102916 | 3642126 | 3639982 TY-2482_chromosome | B7LB28                                                                 | Formate dehydrogenase-H, selenopolypeptide subunit (EC 1.2.1.2)                                                   | Escherichia coli (strain 55989 / EAEC)         |
| 94505  | 3643790 | 3642327 TY-2482_chromosome | B7LB29                                                                 | Outer membrane factor of efflux pump                                                                              | Escherichia coli (strain 55989 / EAEC)         |
| 93995  | 3645838 | 3643790 TY-2482_chromosome | B7LB24                                                                 | Multidrug efflux system component                                                                                 | Escherichia coli (strain 55989 / EAEC)         |
| 64142  | 3646869 | 3645841 TY-2482_chromosome | B7LB31                                                                 | Membrane fusion protein of efflux pump                                                                            | Escherichia coli (strain 55989 / EAEC)         |
| 104528 | 3647163 | 3646891 TY-2482_chromosome | C8TMX3                                                                 | Conserved predicted protein                                                                                       | Escherichia coli O26:H11 (strain 11368 / EHEC) |
| 62799  | 3649357 | 3647375 TY-2482_chromosome | B7LB32                                                                 | Putative alkyl sulfatase                                                                                          | Escherichia coli (strain 55989 / EAEC)         |
| 11905  | 3649610 | 3649924 TY-2482_chromosome | B7LB30                                                                 | Putative ribose-5-phosphate isomerase B (RpiB-like)                                                               | Escherichia coli (strain 55989 / EAEC)         |
| 21587  | 3650485 | 3650105 TY-2482_chromosome | D7XTI2                                                                 | Putative uncharacterized protein                                                                                  | Escherichia coli MS 84-1                       |
| 115994 | 3651230 | 3650475 TY-2482_chromosome | B7LB33                                                                 | Carbon-phosphorus lyase complex accessory protein                                                                 | Escherichia coli (strain 55989 / EAEC)         |
| 111726 | 3651666 | 3651235 TY-2482_chromosome | B7LB36                                                                 | Putative acyltransferase with acyl-CoA N-acyltransferase domain                                                   | Escherichia coli (strain 55989 / EAEC)         |
| 99176  | 3652210 | 3651656 TY-2482_chromosome | B7LB37                                                                 | Ribose 1,5-bisphosphokinase                                                                                       | Escherichia coli (strain 55989 / EAEC)         |
| 110428 | 3653346 | 3652213 TY-2482_chromosome | B7LB38                                                                 | Carbon-phosphorus lyase complex subunit                                                                           | Escherichia coli (strain 55989 / EAEC)         |
| 93097  | 3654065 | 3653346 TY-2482_chromosome | D3GTX6                                                                 | Phosphonates transport ATP-binding protein                                                                        | Escherichia coli O44:H18 (strain 042 / EAEC)   |
| 82799  | 3654958 | 3654203 TY-2482_chromosome | B7LB40                                                                 | Carbon-phosphorus lyase complex subunit                                                                           | Escherichia coli (strain 55989 / EAEC)         |
| 102919 | 3655800 | 3654958 TY-2482_chromosome | B7LB39                                                                 | Carbon-phosphorus lyase complex subunit                                                                           | Escherichia coli (strain 55989 / EAEC)         |
| 116093 | 3656857 | 3655796 TY-2482_chromosome | B7LB42                                                                 | Carbon-phosphorus lyase complex subunit                                                                           | Escherichia coli (strain 55989 / EAEC)         |
| 77434  | 3657890 | 3657441 TY-2482_chromosome | B7LB44                                                                 | Carbon-phosphorus lyase complex subunit                                                                           | Escherichia coli (strain 55989 / EAEC)         |
| 105873 | 3658616 | 3657894 TY-2482_chromosome | B7LB45                                                                 | Putative DNA-binding transcriptional regulator of phosphonate uptake and biodegradator                            | Escherichia coli (strain 55989 / EAEC)         |
| 110634 | 3659479 | 3658640 TY-2482_chromosome | B7LB41                                                                 | Phosphonates transport system, permease protein                                                                   | Escherichia coli (strain 55989 / EAEC)         |
| 67753  | 3660538 | 3659525 TY-2482_chromosome | B7LB46                                                                 | Phosphonate/organophosphate ester transporter subunit ; periplasmic binding component of ABC superfamily          | Escherichia coli (strain 55989 / EAEC)         |
| 79008  | 3661351 | 3660566 TY-2482_chromosome | B7LB48                                                                 | Phosphonate/organophosphate ester transporter subunit ; ATP-binding component of ABC superfamily                  | Escherichia coli (strain 55989 / EAEC)         |
| 69913  | 3661927 | 3661487 TY-2482_chromosome | B7LB49                                                                 | Putative uncharacterized protein phnB                                                                             | Escherichia coli (strain 55989 / EAEC)         |
| 84613  | 3662569 | 3662090 TY-2482_chromosome | B7LB50                                                                 | Putative alkylphosphonate uptake protein in phosphonate metabolism                                                | Escherichia coli (strain 55989 / EAEC)         |
| 65067  | 3662824 | 3665049 TY-2482_chromosome | B7LB47                                                                 | Putative uncharacterized protein yjdA                                                                             | Escherichia coli (strain 55989 / EAEC)         |
| 90017  | 3665049 | 3665924 TY-2482_chromosome | B7LB52                                                                 | Putative uncharacterized protein yjcZ                                                                             | Escherichia coli (strain 55989 / EAEC)         |
| 59158  | 3666191 | 3667690 TY-2482_chromosome | B7LB53                                                                 | Proline/glycine betaine transporter                                                                               | Escherichia coli (strain 55989 / EAEC)         |
| 90372  | 3668961 | 3667873 TY-2482_chromosome | B7LB54                                                                 | Sensory histidine kinase in two-component regulatory system with BasR                                             | Escherichia coli (strain 55989 / EAEC)         |
| 112314 | 3669639 | 3668974 TY-2482_chromosome | B7LB51                                                                 | DNA-binding response regulator in two-component regulatory system with BasS                                       | Escherichia coli (strain 55989 / EAEC)         |
| 93919  | 3671279 | 3669639 TY-2482_chromosome | B7LB56                                                                 | Putative metal dependent hydrolase                                                                                | Escherichia coli (strain 55989 / EAEC)         |
| 83286  | 3672720 | 3671386 TY-2482_chromosome | B7LB57                                                                 | Arginine/agmatine antiporter                                                                                      | Escherichia coli (strain 55989 / EAEC)         |
| 65872  | 3673663 | 3672860 TY-2482_chromosome | B7LB58                                                                 | DNA-binding transcriptional activator                                                                             | Escherichia coli (strain 55989 / EAEC)         |
| 113894 | 3676258 | 3673991 TY-2482_chromosome | B7LB59                                                                 | Biodegradative arginine decarboxylase (EC 4.1.1.19)                                                               | Escherichia coli (strain 55989 / EAEC)         |
| 12974  | 3677361 | 3677552 TY-2482_chromosome | D7YA75                                                                 | Putative uncharacterized protein                                                                                  | Escherichia coli MS 115-1                      |
| 109872 | 3677362 | 3676457 TY-2482_chromosome | B7LB60                                                                 | DNA-binding transcriptional dual regulator                                                                        | Escherichia coli (strain 55989 / EAEC)         |
| 62638  | 3677645 | 3678997 TY-2482_chromosome | B7LB55                                                                 | Alpha-galactosidase, NAD(P)-binding (EC 3.2.1.22)                                                                 | Escherichia coli (strain 55989 / EAEC)         |
| 94574  | 3679115 | 3680521 TY-2482_chromosome | B7LB62                                                                 | Melibiose:sodium symporter                                                                                        | Escherichia coli (strain 55989 / EAEC)         |
| 106540 | 3681292 | 3680666 TY-2482_chromosome | B7LB63                                                                 | Putative uncharacterized protein yjdF                                                                             | Escherichia coli (strain 55989 / EAEC)         |
| 105748 | 3683061 | 3681418 TY-2482_chromosome | B7LB64                                                                 | Anaerobic class I fumarate hydratase (Fumarase B) (EC 4.2.1.2)                                                    | Escherichia coli (strain 55989 / EAEC)         |
| 91939  | 3684479 | 3683142 TY-2482_chromosome | B7LB65                                                                 | C4-dicarboxylate antiporter                                                                                       | Escherichia coli (strain 55989 / EAEC)         |
| 84430  | 3685769 | 3685053 TY-2482_chromosome | B7LB66                                                                 | DNA-binding response regulator in two-component regulatory system with DcuS                                       | Escherichia coli (strain 55989 / EAEC)         |
| 94663  | 3687397 | 3685769 TY-2482_chromosome | B7LB67                                                                 | Sensory histidine kinase in two-component regulatory system with DcuR, regulator of anaerobic fumarate respirator | Escherichia coli (strain 55989 / EAEC)         |
| 90195  | 3687578 | 3687805 TY-2482_chromosome | B7LB61                                                                 | Putative uncharacterized protein yjdl                                                                             | Escherichia coli (strain 55989 / EAEC)         |
| 28165  | 3688244 | 3687852 TY-2482_chromosome | Q1R3D4                                                                 | Putative uncharacterized protein                                                                                  | Escherichia coli (strain UT189 / UPEC)         |

|        |         |                            |                                                                               |                                                                                                                          |                                                |
|--------|---------|----------------------------|-------------------------------------------------------------------------------|--------------------------------------------------------------------------------------------------------------------------|------------------------------------------------|
| 69954  | 3688319 | 3688612 TY-2482_chromosome | B7LBS9                                                                        | Putative uncharacterized protein yjdK                                                                                    | Escherichia coli (strain 55989 / EAEC)         |
| 105827 | 3690452 | 3688938 TY-2482_chromosome | B7LBT1                                                                        | Lysyl-tRNA synthetase 2 (EC 6.1.1.6) (Lysine--tRNA ligase 2)                                                             | Escherichia coli (strain 55989 / EAEC)         |
| 61888  | 3692146 | 3690692 TY-2482_chromosome | B7LBT2                                                                        | Putative transporter                                                                                                     | Escherichia coli (strain 55989 / EAEC)         |
| 108125 | 3694352 | 3692208 TY-2482_chromosome | B7LBT3                                                                        | Lysine decarboxylase 1 (EC 4.1.1.18)                                                                                     | Escherichia coli (strain 55989 / EAEC)         |
| 61112  | 3695766 | 3694435 TY-2482_chromosome | B7LBT4                                                                        | Putative lysine/cadaverine transporter                                                                                   | Escherichia coli (strain 55989 / EAEC)         |
| 99065  | 3697670 | 3696135 TY-2482_chromosome | B7LBT5                                                                        | DNA-binding transcriptional activator                                                                                    | Escherichia coli (strain 55989 / EAEC)         |
| 11087  | 3697957 | 3698280 TY-2482_chromosome | D7ZE65                                                                        | Putative uncharacterized protein                                                                                         | Escherichia coli MS 69-1                       |
| 110636 | 3699261 | 3698422 TY-2482_chromosome | B7LBT7                                                                        | Putative uncharacterized protein                                                                                         | Escherichia coli (strain 55989 / EAEC)         |
| 61211  | 3700051 | 3699566 TY-2482_chromosome | B7LBT9                                                                        | Putative uncharacterized protein yeeW                                                                                    | Escherichia coli (strain 55989 / EAEC)         |
| 64463  | 3700530 | 3700051 TY-2482_chromosome | B7LBU0                                                                        | Toxin of the YeeV-YeeU toxin-antitoxin system                                                                            | Escherichia coli (strain 55989 / EAEC)         |
| 22616  | 3700598 | 3700452 TY-2482_chromosome | E9TQB2                                                                        | Conserved domain protein (Fragment)                                                                                      | Escherichia coli MS 60-1                       |
| 61291  | 3702583 | 3701732 TY-2482_chromosome | B7LBT6                                                                        | Putative uncharacterized protein                                                                                         | Escherichia coli (strain 55989 / EAEC)         |
| 95589  | 3702958 | 3703528 TY-2482_chromosome | B7LFP9                                                                        | Transposase ORF B, IS629                                                                                                 | Escherichia coli (strain 55989 / EAEC)         |
| 16055  | 3703829 | 3703461 TY-2482_chromosome | Q9S110                                                                        | Orf57 protein                                                                                                            | Escherichia coli                               |
| 8446   | 3704052 | 3703747 TY-2482_chromosome | P71290                                                                        | Orf58 protein                                                                                                            | Escherichia coli                               |
| 52537  | 3704123 | 3705643 TY-2482_chromosome | B7LBU5                                                                        | Putative reverse transcriptase-like protein from putative prophage or plasmid (EC 2.7.7.49)                              | Escherichia coli (strain 55989 / EAEC)         |
| 26336  | 3705721 | 3706218 TY-2482_chromosome | Q327G0                                                                        | IS629 ORF2                                                                                                               | Shigella dysenteriae serotype 1 (strain Sd197) |
| 113975 | 3706374 | 3710489 TY-2482_chromosome | B7LBY5                                                                        | Serine protease pet (Plasmid-encoded toxin pet) (EC 3.4.21.72)                                                           | Escherichia coli (strain 55989 / EAEC)         |
| 10660  | 3710897 | 3710589 TY-2482_chromosome | B3IA48                                                                        | Transposase                                                                                                              | Escherichia coli E22                           |
| 43233  | 3711566 | 3710927 TY-2482_chromosome | Q5K5W0                                                                        | Putative uncharacterized protein                                                                                         | Escherichia coli                               |
| 29385  | 3711654 | 3712775 TY-2482_chromosome | B7LBW1                                                                        | Transposase                                                                                                              | Escherichia coli (strain 55989 / EAEC)         |
| 26337  | 3714068 | 3714463 TY-2482_chromosome | Q327G0                                                                        | IS629 ORF2                                                                                                               | Shigella dysenteriae serotype 1 (strain Sd197) |
| 16965  | 3714080 | 3713556 TY-2482_chromosome | D7JSS3                                                                        | Predicted protein                                                                                                        | Escherichia coli FVEC1302                      |
| 28475  | 3715636 | 3714497 TY-2482_chromosome | B7LBV5                                                                        | Transposase, IS110 family                                                                                                | Escherichia coli (strain 55989 / EAEC)         |
| 108664 | 3715685 | 3715882 TY-2482_chromosome | B7LBX6                                                                        | Putative uncharacterized protein                                                                                         | Escherichia coli (strain 55989 / EAEC)         |
| 95485  | 3716069 | 3715875 TY-2482_chromosome | B7LBV3                                                                        | Putative uncharacterized protein                                                                                         | Escherichia coli (strain 55989 / EAEC)         |
| 29384  | 3716376 | 3717299 TY-2482_chromosome | B7LBU8                                                                        | Putative uncharacterized protein                                                                                         | Escherichia coli (strain 55989 / EAEC)         |
| 102235 | 3718445 | 3717255 TY-2482_chromosome | B7LBV1                                                                        | Putative membrane transport protein, major facilitator superfamily                                                       | Escherichia coli (strain 55989 / EAEC)         |
| 86629  | 3718518 | 3720302 TY-2482_chromosome | B7LBV0                                                                        | Aerobactin siderophore biosynthesis protein                                                                              | Escherichia coli (strain 55989 / EAEC)         |
| 78881  | 3720306 | 3721250 TY-2482_chromosome | B7LBU9                                                                        | Aerobactin siderophore biosynthesis protein, N(6)-hydroxylysine acetylase                                                | Escherichia coli (strain 55989 / EAEC)         |
| 82602  | 3721253 | 3722992 TY-2482_chromosome | B7LBU4                                                                        | Aerobactin siderophore biosynthesis protein                                                                              | Escherichia coli (strain 55989 / EAEC)         |
| 88257  | 3722992 | 3724326 TY-2482_chromosome | B7LBU7                                                                        | L-lysine 6-monooxygenase (Lysine N(6)-hydroxylase) (EC 1.14.13.59)                                                       | Escherichia coli (strain 55989 / EAEC)         |
| 28380  | 3724251 | 3726527 TY-2482_chromosome | B7LBU6                                                                        | Ferric aerobactin receptor                                                                                               | Escherichia coli (strain 55989 / EAEC)         |
| 26333  | 3727420 | 3726923 TY-2482_chromosome | Q327G0                                                                        | IS629 ORF2                                                                                                               | Shigella dysenteriae serotype 1 (strain Sd197) |
| 52529  | 3729018 | 3727498 TY-2482_chromosome | B7LB68                                                                        | Putative reverse transcriptase-like protein from putative prophage or plasmid (EC 2.7.7.49) (Reverse transcriptase-like) | Escherichia coli (strain 55989 / EAEC)         |
| 8449   | 3729089 | 3729394 TY-2482_chromosome | P71290                                                                        | Orf58 protein                                                                                                            | Escherichia coli                               |
| 16057  | 3729312 | 3729680 TY-2482_chromosome | Q9S110                                                                        | Orf57 protein                                                                                                            | Escherichia coli                               |
| 95588  | 3730183 | 3729613 TY-2482_chromosome | B7LFP9                                                                        | Transposase ORF B, IS629                                                                                                 | Escherichia coli (strain 55989 / EAEC)         |
| 114469 | 3730692 | 3730444 TY-2482_chromosome | C8UCI0                                                                        | Putative uncharacterized protein                                                                                         | Escherichia coli O111:H- (strain 11128 / EHEC) |
| 73657  | 3731114 | 3730692 TY-2482_chromosome | B7LBY1                                                                        | Putative transposase OrfA from plasmid origin                                                                            | Escherichia coli (strain 55989 / EAEC)         |
| 75558  | 3732256 | 3731345 TY-2482_chromosome | B7LBY2                                                                        | Putative uncharacterized protein                                                                                         | Escherichia coli (strain 55989 / EAEC)         |
| 113920 | 3733023 | 3732346 TY-2482_chromosome | B7LBY3                                                                        | Putative uncharacterized protein                                                                                         | Escherichia coli (strain 55989 / EAEC)         |
| 108655 | 3733358 | 3734818 TY-2482_chromosome | B7LBX6                                                                        | Putative uncharacterized protein                                                                                         | Escherichia coli (strain 55989 / EAEC)         |
| 113973 | 3739498 | 3735644 TY-2482_chromosome | B7LBY5                                                                        | Serine protease pet (Plasmid-encoded toxin pet) (EC 3.4.21.72)                                                           | Escherichia coli (strain 55989 / EAEC)         |
| 27995  | 3740848 | 3741264 TY-2482_chromosome | B6ICP6                                                                        | Truncated transposase                                                                                                    | Escherichia coli (strain SE11)                 |
| 36036  | 3740863 | 3739862 TY-2482_chromosome | C1J8M7                                                                        | TraF                                                                                                                     | Escherichia coli                               |
| 104315 | 3741629 | 3741267 TY-2482_chromosome | B7LBV5                                                                        | Transposase, IS110 family                                                                                                | Escherichia coli (strain 55989 / EAEC)         |
| 16881  | 3741827 | 3741563 TY-2482_chromosome | E3Y4T4                                                                        | Integrase core domain protein                                                                                            | Shigella flexneri 2a str. 2457T                |
| 86874  | 3745485 | 3741972 TY-2482_chromosome | B7LBY9                                                                        | Putative superfamily I DNA helicase                                                                                      | Escherichia coli (strain 55989 / EAEC)         |
| 115829 | 3745574 | 3745834 TY-2482_chromosome | B7LB21                                                                        | Putative uncharacterized protein                                                                                         | Escherichia coli (strain 55989 / EAEC)         |
| 68615  | 3747200 | 3745941 TY-2482_chromosome | B7LB22                                                                        | Prophage integrase                                                                                                       | Escherichia coli (strain 55989 / EAEC)         |
| r317   | 3747473 | 3747398 TY-2482_chromosome | ref NC_010473 :4460936-4461011 Phe tRNA  [gene=pheU] [locus_tag=ECDH10B_4327] |                                                                                                                          |                                                |
| 24375  | 3747512 | 3747267 TY-2482_chromosome | B7LB23                                                                        | Putative uncharacterized protein                                                                                         | Escherichia coli (strain 55989 / EAEC)         |
| 103983 | 3748179 | 3747583 TY-2482_chromosome | D3GV37                                                                        | Putative transcriptional regulator                                                                                       | Escherichia coli O44:H18 (strain 042 / EAEC)   |
| 98238  | 3749889 | 3748195 TY-2482_chromosome | B7LB20                                                                        | Thiol:disulfide interchange protein DsbD (EC 1.8.1.8) (Protein-disulfide reductase)                                      | Escherichia coli (strain 55989 / EAEC)         |
| 30431  | 3750203 | 3749868 TY-2482_chromosome | B7LB26                                                                        | Divalent-cation tolerance protein CutA                                                                                   | Escherichia coli (strain 55989 / EAEC)         |
| 62697  | 3751620 | 3750322 TY-2482_chromosome | B7LB27                                                                        | C4-dicarboxylate antiporter                                                                                              | Escherichia coli (strain 55989 / EAEC)         |
| 27929  | 3751720 | 3753168 TY-2482_chromosome | Q8FAM6                                                                        | Putative uncharacterized protein                                                                                         | Escherichia coli O6                            |
| 82601  | 3753511 | 3753984 TY-2482_chromosome | B7LB25                                                                        | Inner membrane protein                                                                                                   | Escherichia coli (strain 55989 / EAEC)         |
| 107831 | 3755259 | 3754006 TY-2482_chromosome | B7LC00                                                                        | Transporter                                                                                                              | Escherichia coli (strain 55989 / EAEC)         |
| 25662  | 3755725 | 3755405 TY-2482_chromosome | A1AJ50                                                                        | Putative uncharacterized protein                                                                                         | Escherichia coli O1:K1 / APEC                  |
| 30287  | 3755872 | 3757515 TY-2482_chromosome | B7LC02                                                                        | 60 kDa chaperonin (GroEL protein) (Protein Cpn60)                                                                        | Escherichia coli (strain 55989 / EAEC)         |
| 99066  | 3757656 | 3758006 TY-2482_chromosome | B7LB29                                                                        | Putative uncharacterized protein yjeI                                                                                    | Escherichia coli (strain 55989 / EAEC)         |
| 99067  | 3759081 | 3758215 TY-2482_chromosome | B7LC04                                                                        | Putative uncharacterized protein yjeI                                                                                    | Escherichia coli (strain 55989 / EAEC)         |

|        |         |                            |                                                                              |                                                                                                                        |                                                   |
|--------|---------|----------------------------|------------------------------------------------------------------------------|------------------------------------------------------------------------------------------------------------------------|---------------------------------------------------|
| 62700  | 3760499 | 3759474 TY-2482_chromosome | B7LC05                                                                       | Putative lysine aminomutase                                                                                            | Escherichia coli (strain 55989 / EAEC)            |
| 30738  | 3760541 | 3761104 TY-2482_chromosome | B7LC03                                                                       | Elongation factor P (EF-P)                                                                                             | Escherichia coli (strain 55989 / EAEC)            |
| 29325  | 3761630 | 3761382 TY-2482_chromosome | A7ZV20                                                                       | Putative uncharacterized protein                                                                                       | Escherichia coli O139:H28 (strain E24377A) / ETEC |
| 110601 | 3761716 | 3762030 TY-2482_chromosome | B7LC09                                                                       | Multidrug efflux system protein                                                                                        | Escherichia coli (strain 55989 / EAEC)            |
| 59057  | 3762563 | 3762033 TY-2482_chromosome | B7LC10                                                                       | Outer membrane lipoprotein (Lipopalin)                                                                                 | Escherichia coli (strain 55989 / EAEC)            |
| 88258  | 3763785 | 3762655 TY-2482_chromosome | B7LC06                                                                       | Beta-lactamase/D-alanine carboxypeptidase (EC 3.5.2.6)                                                                 | Escherichia coli (strain 55989 / EAEC)            |
| 31020  | 3764195 | 3763839 TY-2482_chromosome | B7LC12                                                                       | Fumarate reductase subunit D (Fumarate reductase 13 kDa hydrophobic protein)                                           | Escherichia coli (strain 55989 / EAEC)            |
| 31016  | 3764601 | 3764209 TY-2482_chromosome | B7LC13                                                                       | Fumarate reductase subunit C (Fumarate reductase 15 kDa hydrophobic protein)                                           | Escherichia coli (strain 55989 / EAEC)            |
| 69498  | 3765346 | 3764615 TY-2482_chromosome | B7LC11                                                                       | Fumarate reductase (Anaerobic), Fe-S subunit (EC 1.3.99.1)                                                             | Escherichia coli (strain 55989 / EAEC)            |
| 113923 | 3767147 | 3765342 TY-2482_chromosome | B7LC15                                                                       | Fumarate reductase (Anaerobic) catalytic and NAD/flavoprotein subunit (EC 1.3.99.1)                                    | Escherichia coli (strain 55989 / EAEC)            |
| 35004  | 3767472 | 3768446 TY-2482_chromosome | B7LC16                                                                       | Uncharacterized protein YjeA                                                                                           | Escherichia coli (strain 55989 / EAEC)            |
| 107732 | 3768668 | 3770167 TY-2482_chromosome | B7LC17                                                                       | Putative transporter                                                                                                   | Escherichia coli (strain 55989 / EAEC)            |
| 66372  | 3770222 | 3770533 TY-2482_chromosome | B7LC14                                                                       | Putative uncharacterized protein yjeN                                                                                  | Escherichia coli (strain 55989 / EAEC)            |
| 60808  | 3770533 | 3770844 TY-2482_chromosome | B7LC19                                                                       | Putative uncharacterized protein yjeO                                                                                  | Escherichia coli (strain 55989 / EAEC)            |
| 77303  | 3774199 | 3770879 TY-2482_chromosome | B7LC20                                                                       | Putative mechanosensitive channel                                                                                      | Escherichia coli (strain 55989 / EAEC)            |
| 33098  | 3775189 | 3774224 TY-2482_chromosome | B7LC21                                                                       | Phosphatidylserine decarboxylase proenzyme (EC 4.1.1.65) [Cleaved into: Phosphatidylserine decarboxylase alpha ch      | Escherichia coli (strain 55989 / EAEC)            |
| 33780  | 3776338 | 3775289 TY-2482_chromosome | B7LC22                                                                       | Putative ribosome biogenesis GTPase RsgA (EC 3.6.1.-)                                                                  | Escherichia coli (strain 55989 / EAEC)            |
| 61322  | 3776433 | 3776975 TY-2482_chromosome | B7LC23                                                                       | Oligoribonuclease (EC 3.1.-.-)                                                                                         | Escherichia coli (strain 55989 / EAEC)            |
| r308   | 3777189 | 3777264 TY-2482_chromosome | ref NC_010473 :4490968-4491043 Gly tRNA [gene=glyY] [locus_tag=ECDH10B_4360] |                                                                                                                        |                                                   |
| r309   | 3777301 | 3777376 TY-2482_chromosome | ref NC_010473 :4490968-4491043 Gly tRNA [gene=glyY] [locus_tag=ECDH10B_4360] |                                                                                                                        |                                                   |
| 26501  | 3777469 | 3777203 TY-2482_chromosome | A1AJ71                                                                       | Putative uncharacterized protein                                                                                       | Escherichia coli O1:K1 / APEC                     |
| 77369  | 3778784 | 3780328 TY-2482_chromosome | B7LC25                                                                       | Putative carbohydrate kinase                                                                                           | Escherichia coli (strain 55989 / EAEC)            |
| 62701  | 3778785 | 3777649 TY-2482_chromosome | B7LC18                                                                       | Putative Fe-S electron transport protein                                                                               | Escherichia coli (strain 55989 / EAEC)            |
| 110381 | 3780303 | 3780761 TY-2482_chromosome | B7LC27                                                                       | ATPase with strong ADP affinity                                                                                        | Escherichia coli (strain 55989 / EAEC)            |
| 64293  | 3780783 | 3782117 TY-2482_chromosome | B7LC28                                                                       | N-acetylmuramoyl-L-alanine amidase II (EC 3.5.1.28)                                                                    | Escherichia coli (strain 55989 / EAEC)            |
| 32575  | 3782130 | 3783974 TY-2482_chromosome | B7LC24                                                                       | DNA mismatch repair protein mutL                                                                                       | Escherichia coli (strain 55989 / EAEC)            |
| 32391  | 3783970 | 3784917 TY-2482_chromosome | B7LC30                                                                       | tRNA dimethylallyltransferase (EC 2.5.1.75) (Dimethylallyl diphosphate:tRNA dimethylallyltransferase) (DMAPP:tRNA      | Escherichia coli (strain 55989 / EAEC)            |
| 31360  | 3785006 | 3785311 TY-2482_chromosome | B7LC31                                                                       | Protein hfq (HF-1) (Host factor-I protein) (HF-I)                                                                      | Escherichia coli (strain 55989 / EAEC)            |
| 84422  | 3785391 | 3786668 TY-2482_chromosome | B7LC32                                                                       | Putative GTPase                                                                                                        | Escherichia coli (strain 55989 / EAEC)            |
| 106453 | 3786757 | 3788013 TY-2482_chromosome | B7LC29                                                                       | Modulator for HflB protease specific for phage lambda cII repressor                                                    | Escherichia coli (strain 55989 / EAEC)            |
| 59006  | 3788019 | 3789020 TY-2482_chromosome | B7LC34                                                                       | Modulator for HflB protease specific for phage lambda cII repressor                                                    | Escherichia coli (strain 55989 / EAEC)            |
| 81117  | 3789105 | 3789299 TY-2482_chromosome | B7LC35                                                                       | Putative uncharacterized protein yjeT                                                                                  | Escherichia coli (strain 55989 / EAEC)            |
| 33155  | 3789406 | 3790701 TY-2482_chromosome | B7LC36                                                                       | Adenylosuccinate synthetase (AMPSase) (AdSS) (EC 6.3.4.4) (IMP--aspartate ligase)                                      | Escherichia coli (strain 55989 / EAEC)            |
| 32721  | 3790909 | 3791331 TY-2482_chromosome | B7LC37                                                                       | HTH-type transcriptional repressor nsrR                                                                                | Escherichia coli (strain 55989 / EAEC)            |
| 99124  | 3791373 | 3793811 TY-2482_chromosome | B7LC38                                                                       | Exoribonuclease R, RNase R (EC 3.1.-.-)                                                                                | Escherichia coli (strain 55989 / EAEC)            |
| 62618  | 3793994 | 3794722 TY-2482_chromosome | B7LC33                                                                       | 23S rRNA (Gm2251)-methyltransferase (EC 2.1.1.-)                                                                       | Escherichia coli (strain 55989 / EAEC)            |
| 106361 | 3794852 | 3795250 TY-2482_chromosome | B7LC40                                                                       | Putative uncharacterized protein yjfI                                                                                  | Escherichia coli (strain 55989 / EAEC)            |
| 97333  | 3795272 | 3795967 TY-2482_chromosome | B7LC41                                                                       | Putative transcriptional regulator effector protein                                                                    | Escherichia coli (strain 55989 / EAEC)            |
| 110581 | 3796021 | 3796677 TY-2482_chromosome | B7LC42                                                                       | Putative uncharacterized protein yjfK                                                                                  | Escherichia coli (strain 55989 / EAEC)            |
| 77536  | 3796698 | 3797093 TY-2482_chromosome | B7LC43                                                                       | Putative uncharacterized protein yjfL                                                                                  | Escherichia coli (strain 55989 / EAEC)            |
| 108849 | 3797106 | 3797741 TY-2482_chromosome | B7LC39                                                                       | Putative uncharacterized protein yjfM                                                                                  | Escherichia coli (strain 55989 / EAEC)            |
| 60764  | 3797747 | 3798907 TY-2482_chromosome | B7LC46                                                                       | Putative synthetase/amidase                                                                                            | Escherichia coli (strain 55989 / EAEC)            |
| 102724 | 3798994 | 3800616 TY-2482_chromosome | B7LC47                                                                       | Isovaleryl CoA dehydrogenase                                                                                           | Escherichia coli (strain 55989 / EAEC)            |
| 113859 | 3801023 | 3800739 TY-2482_chromosome | B5Z2J4                                                                       | Putative uncharacterized protein                                                                                       | Escherichia coli O157:H7 (strain EC4115) / EHEC,  |
| 66349  | 3801489 | 3801163 TY-2482_chromosome | B7LC49                                                                       | Putative uncharacterized protein yjfO                                                                                  | Escherichia coli (strain 55989 / EAEC)            |
| 84536  | 3801671 | 3802417 TY-2482_chromosome | B7LC50                                                                       | Putative hydrolase                                                                                                     | Escherichia coli (strain 55989 / EAEC)            |
| 34507  | 3803172 | 3802420 TY-2482_chromosome | B7LC45                                                                       | HTH-type transcriptional regulator ulaR                                                                                | Escherichia coli (strain 55989 / EAEC)            |
| 34504  | 3804344 | 3803283 TY-2482_chromosome | B7LC52                                                                       | Probable L-ascorbate-6-phosphate lactonase ulaG (EC 3.1.1.-) (L-ascorbate utilization protein G)                       | Escherichia coli (strain 55989 / EAEC)            |
| 71882  | 3804699 | 3806093 TY-2482_chromosome | B7LC53                                                                       | L-ascorbate-specific enzyme IIC component of PTS                                                                       | Escherichia coli (strain 55989 / EAEC)            |
| 97171  | 3806427 | 3806888 TY-2482_chromosome | B7LC51                                                                       | L-ascorbate-specific enzyme IIA component of PTS (EC 2.7.1.69)                                                         | Escherichia coli (strain 55989 / EAEC)            |
| 24843  | 3806428 | 3806096 TY-2482_chromosome | A1AJ99                                                                       | Putative uncharacterized protein                                                                                       | Escherichia coli O1:K1 / APEC                     |
| 34489  | 3807565 | 3808416 TY-2482_chromosome | B7LCQ7                                                                       | L-ribulose-5-phosphate 3-epimerase ulaE (EC 5.1.3.22) (L-ascorbate utilization protein E) (L-xylulose-5-phosphate 3-ep | Escherichia coli (strain 55989 / EAEC)            |
| 27102  | 3807579 | 3806914 TY-2482_chromosome | A7ZV67                                                                       | Putative uncharacterized protein                                                                                       | Escherichia coli O139:H28 (strain E24377A) / ETEC |
| 34495  | 3808419 | 3809102 TY-2482_chromosome | B7LCQ8                                                                       | L-ribulose-5-phosphate 4-epimerase UlaF (EC 5.1.3.4) (L-ascorbate utilization protein F) (Phosphoribulose isomerase    | Escherichia coli (strain 55989 / EAEC)            |
| 106447 | 3809250 | 3809798 TY-2482_chromosome | B7LCQ9                                                                       | Putative inner membrane protein yagU                                                                                   | Escherichia coli (strain 55989 / EAEC)            |
| 107874 | 3810151 | 3809879 TY-2482_chromosome | B7LCR0                                                                       | Putative uncharacterized protein yjfY                                                                                  | Escherichia coli (strain 55989 / EAEC)            |
| 33758  | 3810478 | 3810870 TY-2482_chromosome | B7LCQ6                                                                       | 30S ribosomal protein S6                                                                                               | Escherichia coli (strain 55989 / EAEC)            |
| 33066  | 3810880 | 3811191 TY-2482_chromosome | B7LCR2                                                                       | Primosomal replication protein n                                                                                       | Escherichia coli (strain 55989 / EAEC)            |
| 33728  | 3811199 | 3811423 TY-2482_chromosome | B7LCR3                                                                       | 30S ribosomal protein S18                                                                                              | Escherichia coli (strain 55989 / EAEC)            |
| 25506  | 3811929 | 3811444 TY-2482_chromosome | Q8FAI4                                                                       | Putative uncharacterized protein                                                                                       | Escherichia coli O6                               |
| 97577  | 3812782 | 3811991 TY-2482_chromosome | B7LCR5                                                                       | Putative uncharacterized protein yjfZ                                                                                  | Escherichia coli (strain 55989 / EAEC)            |
| 111678 | 3813821 | 3813225 TY-2482_chromosome | C8ULY2                                                                       | Putative IS609 transposase TnpA                                                                                        | Escherichia coli O111:H- (strain 11128) / EHEC,   |
| 84537  | 3813844 | 3815049 TY-2482_chromosome | B7LCR8                                                                       | Putative transposase                                                                                                   | Escherichia coli (strain 55989 / EAEC)            |
| 97257  | 3815825 | 3815190 TY-2482_chromosome | C8TP27                                                                       | Predicted cell envelope opacity-associated protein                                                                     | Escherichia coli O26:H11 (strain 11368) / EHEC,   |

|        |         |                            |               |                                                                                                                      |                                                  |
|--------|---------|----------------------------|---------------|----------------------------------------------------------------------------------------------------------------------|--------------------------------------------------|
| 12919  | 3815900 | 3816661 TY-2482_chromosome | C1NBA6        | Peptidyl-prolyl cis-trans isomerase (EC 5.2.1.8) (Fragment)                                                          | Escherichia sp. 1_1_43                           |
| 62689  | 3816973 | 3818382 TY-2482_chromosome | B7LCS1        | D-alanine/D-serine/glycine transporter                                                                               | Escherichia coli (strain 55989 / EAEC)           |
| 35071  | 3819092 | 3818433 TY-2482_chromosome | B7LCS2        | Iron-sulfur cluster repair protein YtfE                                                                              | Escherichia coli (strain 55989 / EAEC)           |
| 62704  | 3820174 | 3819203 TY-2482_chromosome | B7LCS3        | Putative uncharacterized protein ytfF                                                                                | Escherichia coli (strain 55989 / EAEC)           |
| 115820 | 3821133 | 3820276 TY-2482_chromosome | B7LCS4        | NAD(P)H:quinone oxidoreductase                                                                                       | Escherichia coli (strain 55989 / EAEC)           |
| 106449 | 3823674 | 3821734 TY-2482_chromosome | B7LCS6        | 2':3'-cyclic-nucleotide 2'-phosphodiesterase (EC 3.1.4.16)                                                           | Escherichia coli (strain 55989 / EAEC)           |
| 90695  | 3823864 | 3824601 TY-2482_chromosome | B7LCS0        | PAPS (Adenosine 3'-phosphate 5'-phosphosulfate) 3'(2'),5'-bisphosphate nucleotidase                                  | Escherichia coli (strain 55989 / EAEC)           |
| 91805  | 3825151 | 3824597 TY-2482_chromosome | B7LCS8        | Putative transcriptional regulator                                                                                   | Escherichia coli (strain 55989 / EAEC)           |
| 53806  | 3825410 | 3825679 TY-2482_chromosome | Q8Z151        | Putative uncharacterized protein ytfK                                                                                | Salmonella typhi                                 |
| 88250  | 3827087 | 3825747 TY-2482_chromosome | B7LCT0        | Putative uncharacterized protein ytfL                                                                                | Escherichia coli (strain 55989 / EAEC)           |
| 32494  | 3828048 | 3827413 TY-2482_chromosome | B7LCT1        | Peptide methionine sulfoxide reductase MsrA (Protein-methionine-S-oxide reductase) (EC 1.8.4.11) (Peptide-methionine | Escherichia coli (strain 55989 / EAEC)           |
| 86343  | 3828254 | 3829984 TY-2482_chromosome | B7LCS7        | Putative uncharacterized protein ytfM                                                                                | Escherichia coli (strain 55989 / EAEC)           |
| 94005  | 3829984 | 3833760 TY-2482_chromosome | B7LCT3        | Putative uncharacterized protein ytfN                                                                                | Escherichia coli (strain 55989 / EAEC)           |
| 102783 | 3833766 | 3834104 TY-2482_chromosome | B7LCT4        | Putative uncharacterized protein ytfP                                                                                | Escherichia coli (strain 55989 / EAEC)           |
| 62599  | 3834313 | 3834567 TY-2482_chromosome | B5Z310        | PemI protein 2                                                                                                       | Escherichia coli O157:H7 (strain EC4115 / EHEC)  |
| 82505  | 3834564 | 3834911 TY-2482_chromosome | B7LCT2        | Toxin of the ChpB-ChpS toxin-antitoxin system                                                                        | Escherichia coli (strain 55989 / EAEC)           |
| 114159 | 3835524 | 3834997 TY-2482_chromosome | B7LCT7        | Inorganic pyrophosphatase (EC 3.6.1.1)                                                                               | Escherichia coli (strain 55989 / EAEC)           |
| 110599 | 3835834 | 3836787 TY-2482_chromosome | B7LCT8        | Putative sugar transporter subunit: periplasmic-binding component of ABC superfamily                                 | Escherichia coli (strain 55989 / EAEC)           |
| 97649  | 3837100 | 3838599 TY-2482_chromosome | B7LCT9        | Putative sugar transporter subunit: ATP-binding component of ABC superfamily                                         | Escherichia coli (strain 55989 / EAEC)           |
| 98354  | 3838616 | 3839635 TY-2482_chromosome | B7LCT6        | Putative sugar transporter subunit: membrane component of ABC superfamily                                            | Escherichia coli (strain 55989 / EAEC)           |
| 91248  | 3839625 | 3840617 TY-2482_chromosome | B7LCU0        | Putative sugar transporter subunit: membrane component of ABC superfamily                                            | Escherichia coli (strain 55989 / EAEC)           |
| 88509  | 3841651 | 3840656 TY-2482_chromosome | B7LCU2        | Fructose-1,6-bisphosphatase class 1 (FBPase class 1) (EC 3.1.3.11) (D-fructose-1,6-bisphosphate 1-phosphohydrolase   | Escherichia coli (strain 55989 / EAEC)           |
| 59053  | 3841827 | 3843197 TY-2482_chromosome | B7LCU3        | UDP-N-acetylmuramate:L-alanyl-gamma-D-glutamyl-meso-diaminopimelate ligase (EC 6.3.2.-)                              | Escherichia coli (strain 55989 / EAEC)           |
| 35015  | 3843902 | 3843354 TY-2482_chromosome | B7LCU1        | UPF0307 protein yjgA                                                                                                 | Escherichia coli (strain 55989 / EAEC)           |
| 71362  | 3843996 | 3845345 TY-2482_chromosome | B7LCU4        | Peptidase required for the maturation and secretion of the antibiotic peptide MccB17                                 | Escherichia coli (strain 55989 / EAEC)           |
| 90441  | 3845531 | 3845914 TY-2482_chromosome | B7LCU6        | Soluble cytochrome b562                                                                                              | Escherichia coli (strain 55989 / EAEC)           |
| 76802  | 3846426 | 3845965 TY-2482_chromosome | B7LCU7        | Anaerobic ribonucleoside-triphosphate reductase-activating protein (EC 1.97.1.-)                                     | Escherichia coli (strain 55989 / EAEC)           |
| 72429  | 3848722 | 3846587 TY-2482_chromosome | B7LCU8        | Anaerobic ribonucleoside-triphosphate reductase (EC 1.17.4.2)                                                        | Escherichia coli (strain 55989 / EAEC)           |
| 73652  | 3850780 | 3849128 TY-2482_chromosome | B7LCU5        | Trehalose-6-P hydrolase (EC 3.2.1.93)                                                                                | Escherichia coli (strain 55989 / EAEC)           |
| 66400  | 3852251 | 3850833 TY-2482_chromosome | B7LCV0        | Fused trehalose(Maltose)-specific PTS enzyme: IIB component ; IIC component                                          | Escherichia coli (strain 55989 / EAEC)           |
| 80321  | 3853317 | 3852373 TY-2482_chromosome | B7LCV1        | DNA-binding transcriptional repressor                                                                                | Escherichia coli (strain 55989 / EAEC)           |
| 65430  | 3853696 | 3856389 TY-2482_chromosome | B7LCV2        | Magnesium transporter (EC 3.6.3.1)                                                                                   | Escherichia coli (strain 55989 / EAEC)           |
| 115749 | 3857600 | 3856623 TY-2482_chromosome | B7LF78        | Transposase, IS110 family                                                                                            | Escherichia coli (strain 55989 / EAEC)           |
| 29492  | 3857970 | 3858431 TY-2482_chromosome | Q1R311        | Putative uncharacterized protein                                                                                     | Escherichia coli (strain UT189 / UPEC)           |
| 33218  | 3858797 | 3858339 TY-2482_chromosome | B7LCV5        | Aspartate carbamoyltransferase regulatory chain                                                                      | Escherichia coli (strain 55989 / EAEC)           |
| 33193  | 3859745 | 3858813 TY-2482_chromosome | B7LCV3        | Aspartate carbamoyltransferase (EC 2.1.3.2) (Aspartate transcarbamylase) (ATCase)                                    | Escherichia coli (strain 55989 / EAEC)           |
| 21955  | 3859863 | 3860192 TY-2482_chromosome | Q79D60        | ORF_o110                                                                                                             | Escherichia coli                                 |
| 90526  | 3859940 | 3859752 TY-2482_chromosome | G6UP50        | PyrBI operon leader peptide                                                                                          | Escherichia coli O157:H7 (strain TW14359 / EHEC) |
| 64827  | 3860559 | 3860167 TY-2482_chromosome | B7LCV8        | Putative mRNA endoribonuclease                                                                                       | Escherichia coli (strain 55989 / EAEC)           |
| 110600 | 3861403 | 3860693 TY-2482_chromosome | B7LCV9        | Putative oxidoreductase with NAD(P)-binding Rossmann-fold domain                                                     | Escherichia coli (strain 55989 / EAEC)           |
| 66404  | 3861474 | 3862064 TY-2482_chromosome | B7LCV6        | Putative transcriptional regulator                                                                                   | Escherichia coli (strain 55989 / EAEC)           |
| 110561 | 3862212 | 3862661 TY-2482_chromosome | B7LCW1        | Putative uncharacterized protein yjgK                                                                                | Escherichia coli (strain 55989 / EAEC)           |
| 101286 | 3862787 | 3864345 TY-2482_chromosome | C8TP74        | Putative uncharacterized protein                                                                                     | Escherichia coli O26:H11 (strain 11368 / EHEC)   |
| 29447  | 3864324 | 3864374 TY-2482_chromosome | C5W5U6        | Predicted protein                                                                                                    | Escherichia coli (strain B / BL21)               |
| 32841  | 3865453 | 3864452 TY-2482_chromosome | B7LCW4        | Ornithine carbamoyltransferase (OTCase) (EC 2.1.3.3)                                                                 | Escherichia coli (strain 55989 / EAEC)           |
| 111498 | 3865615 | 3866028 TY-2482_chromosome | B7LCW5        | Putative uncharacterized protein yjgD                                                                                | Escherichia coli (strain 55989 / EAEC)           |
| 95377  | 3866580 | 3866080 TY-2482_chromosome | B7LCW6        | Putative acetyltransferase                                                                                           | Escherichia coli (strain 55989 / EAEC)           |
| 106347 | 3866773 | 3867966 TY-2482_chromosome | B7LCW7        | Putative uncharacterized protein yjgN                                                                                | Escherichia coli (strain 55989 / EAEC)           |
| 76355  | 3870880 | 3868028 TY-2482_chromosome | B7LCW8        | Valyl-tRNA synthetase (EC 6.1.1.9) (Valine--tRNA ligase)                                                             | Escherichia coli (strain 55989 / EAEC)           |
| 57429  | 3871362 | 3870883 TY-2482_chromosome | Q8Z117        | DNA polymerase III, chi subunit                                                                                      | Salmonella typhi                                 |
| 29771  | 3872968 | 3871460 TY-2482_chromosome | B7LCX0        | Probable cytosol aminopeptidase (EC 3.4.11.1) (Leucine aminopeptidase) (LAP) (EC 3.4.11.10) (Leucyl aminopeptidase)  | Escherichia coli (strain 55989 / EAEC)           |
| 64129  | 3873235 | 3874332 TY-2482_chromosome | B7LCX1        | Putative uncharacterized protein yjgP                                                                                | Escherichia coli (strain 55989 / EAEC)           |
| 59202  | 3874335 | 3875414 TY-2482_chromosome | B7LCX2        | Putative uncharacterized protein yjgQ                                                                                | Escherichia coli (strain 55989 / EAEC)           |
| 112154 | 3877038 | 3875539 TY-2482_chromosome | B7LCX3        | Putative ATPase                                                                                                      | Escherichia coli (strain 55989 / EAEC)           |
| 102698 | 3878114 | 3877119 TY-2482_chromosome | B7LCW9        | DNA-binding transcriptional repressor, 5-gluconate-binding                                                           | Escherichia coli (strain 55989 / EAEC)           |
| 66333  | 3879500 | 3878184 TY-2482_chromosome | B7LCX5        | L-idonate and D-gluconate transporter                                                                                | Escherichia coli (strain 55989 / EAEC)           |
| 77519  | 3880329 | 3879568 TY-2482_chromosome | B7LCX6        | 5-keto-D-gluconate-5-reductase (EC 1.1.1.69)                                                                         | Escherichia coli (strain 55989 / EAEC)           |
| 96962  | 3881384 | 3880356 TY-2482_chromosome | B7LCX7        | L-idonate 5-dehydrogenase, NAD-binding (EC 1.1.1.264)                                                                | Escherichia coli (strain 55989 / EAEC)           |
| 73829  | 3881601 | 3882161 TY-2482_chromosome | B7LCX4        | D-gluconate kinase, thermosensitive (EC 2.7.1.12)                                                                    | Escherichia coli (strain 55989 / EAEC)           |
| 71867  | 3883187 | 3882171 TY-2482_chromosome | B7LCX9        | Putative alcohol dehydrogenase, Zn-dependent and NAD(P)-binding                                                      | Escherichia coli (strain 55989 / EAEC)           |
| r228   | 3883383 | 3883467 TY-2482_chromosome | ref NC_010473 | :4596236-4596320 Leu tRNA [gene=leuX] [locus_tag=ECDH10B_4463]                                                       |                                                  |
| 110519 | 3883468 | 3883265 TY-2482_chromosome | B7LCY0        | Putative uncharacterized protein                                                                                     | Escherichia coli (strain 55989 / EAEC)           |
| 73635  | 3884624 | 3883620 TY-2482_chromosome | B7LDP4        | Putative uncharacterized protein                                                                                     | Escherichia coli (strain 55989 / EAEC)           |
| 97591  | 3886152 | 3884536 TY-2482_chromosome | B7LDP5        | Putative uncharacterized protein                                                                                     | Escherichia coli (strain 55989 / EAEC)           |

|        |         |                            |        |                                                                                                                |                                                   |
|--------|---------|----------------------------|--------|----------------------------------------------------------------------------------------------------------------|---------------------------------------------------|
| 64740  | 3887496 | 3886165 TY-2482_chromosome | B7LDP6 | Putative uncharacterized protein                                                                               | Escherichia coli (strain 55989 / EAEC)            |
| 24262  | 3887779 | 3887456 TY-2482_chromosome | B7LDP1 | Putative uncharacterized protein                                                                               | Escherichia coli (strain 55989 / EAEC)            |
| 28953  | 3888986 | 3888117 TY-2482_chromosome | B7LDP8 | Putative uncharacterized protein                                                                               | Escherichia coli (strain 55989 / EAEC)            |
| 10354  | 3889674 | 3889234 TY-2482_chromosome | E5ZR87 | Conserved domain protein                                                                                       | Escherichia coli MS 110-3                         |
| 14369  | 3890362 | 3889668 TY-2482_chromosome | E1U309 | Transposase InsAB'                                                                                             | Escherichia coli                                  |
| 99088  | 3891282 | 3891575 TY-2482_chromosome | B7LDQ2 | Putative transcriptional regulator                                                                             | Escherichia coli (strain 55989 / EAEC)            |
| 102810 | 3891728 | 3891904 TY-2482_chromosome | B7LDQ3 | Putative uncharacterized protein                                                                               | Escherichia coli (strain 55989 / EAEC)            |
| 102811 | 3892148 | 3892324 TY-2482_chromosome | B7LDQ3 | Putative uncharacterized protein                                                                               | Escherichia coli (strain 55989 / EAEC)            |
| 25098  | 3892288 | 3892464 TY-2482_chromosome | B7LDQ4 | Putative uncharacterized protein                                                                               | Escherichia coli (strain 55989 / EAEC)            |
| 59068  | 3892628 | 3893701 TY-2482_chromosome | B7LDQ7 | Putative Filamentation induced by cAMP protein Fic                                                             | Escherichia coli (strain 55989 / EAEC)            |
| 28915  | 3894384 | 3893758 TY-2482_chromosome | B7LDQ8 | Putative uncharacterized protein                                                                               | Escherichia coli (strain 55989 / EAEC)            |
| 14375  | 3894426 | 3895120 TY-2482_chromosome | E1U309 | Transposase InsAB'                                                                                             | Escherichia coli                                  |
| 88299  | 3896119 | 3895298 TY-2482_chromosome | B7LDQ5 | Putative Transcriptional regulator                                                                             | Escherichia coli (strain 55989 / EAEC)            |
| 109633 | 3896246 | 3897838 TY-2482_chromosome | B7LDR2 | PTS system, glucose-specific enzyme II, ABC component (EC 2.7.1.69)                                            | Escherichia coli (strain 55989 / EAEC)            |
| 102812 | 3897841 | 3898527 TY-2482_chromosome | B7LDR3 | Putative N-acetylmannosamine-6-phosphate 2-epimerase 2 (EC 5.1.3.9) (ManNAc-6-P epimerase 2)                   | Escherichia coli (strain 55989 / EAEC)            |
| 83169  | 3898591 | 3898803 TY-2482_chromosome | B7LDR4 | Putative uncharacterized protein                                                                               | Escherichia coli (strain 55989 / EAEC)            |
| 89975  | 3898785 | 3899003 TY-2482_chromosome | B7LDR5 | Putative uncharacterized protein                                                                               | Escherichia coli (strain 55989 / EAEC)            |
| 9560   | 3898904 | 3899209 TY-2482_chromosome | E5ZNX5 | Putative uncharacterized protein                                                                               | Escherichia coli MS 110-3                         |
| 18905  | 3899580 | 3900001 TY-2482_chromosome | B3IA39 | Truncated transposase                                                                                          | Escherichia coli E22                              |
| 24006  | 3900648 | 3900094 TY-2482_chromosome | B7UHC5 | Transposase of ISec13 of IS110 family (Transposase of ISEc21)                                                  | Escherichia coli O127:H6 (strain E2348/69 / EPEC) |
| 69975  | 3901807 | 3900779 TY-2482_chromosome | B7LDS0 | Putative Transcriptional regulator                                                                             | Escherichia coli (strain 55989 / EAEC)            |
| 101549 | 3902078 | 3902518 TY-2482_chromosome | B7LDS1 | Putative PTS system, specific IIA component                                                                    | Escherichia coli (strain 55989 / EAEC)            |
| 108075 | 3902537 | 3902821 TY-2482_chromosome | B7LDS2 | Putative PTS system, specific IIB component                                                                    | Escherichia coli (strain 55989 / EAEC)            |
| 84532  | 3902837 | 3904090 TY-2482_chromosome | B7LDR9 | Putative PTS system, Specific IIC component                                                                    | Escherichia coli (strain 55989 / EAEC)            |
| 88300  | 3904594 | 3904343 TY-2482_chromosome | B7LDS3 | Putative transposase ORF1, IS3 family                                                                          | Escherichia coli (strain 55989 / EAEC)            |
| 62706  | 3906029 | 3905019 TY-2482_chromosome | B7LDS6 | Deoxyribose specific mutarotase                                                                                | Escherichia coli (strain 55989 / EAEC)            |
| 95521  | 3907357 | 3906044 TY-2482_chromosome | B7LDS7 | Putative L-fucose permease                                                                                     | Escherichia coli (strain 55989 / EAEC)            |
| 73698  | 3908332 | 3907388 TY-2482_chromosome | B7LDS8 | Deoxyribokinase (EC 2.7.1.15)                                                                                  | Escherichia coli (strain 55989 / EAEC)            |
| 65831  | 3908608 | 3909390 TY-2482_chromosome | B7LDS4 | Putative transcriptional regulator                                                                             | Escherichia coli (strain 55989 / EAEC)            |
| 101113 | 3909645 | 3909398 TY-2482_chromosome | D3GWZ4 | Putative acetolactate synthase isozyme I small subunit (EC 2.2.1.6) (Fragment)                                 | Escherichia coli O44:H18 (strain 042 / EAEC)      |
| 23390  | 3909821 | 3909624 TY-2482_chromosome | C1HR96 | Putative uncharacterized protein                                                                               | Escherichia sp. 3_2_53FAA                         |
| 27559  | 3910175 | 3910498 TY-2482_chromosome | Q8FKR7 | Putative uncharacterized protein                                                                               | Escherichia coli O6                               |
| 75970  | 3912190 | 3910580 TY-2482_chromosome | B7LDT2 | Putative uncharacterized protein                                                                               | Escherichia coli (strain 55989 / EAEC)            |
| 57843  | 3912571 | 3912224 TY-2482_chromosome | B7LB70 | Putative uncharacterized protein (Transposase)                                                                 | Escherichia coli (strain 55989 / EAEC)            |
| 84646  | 3912993 | 3912571 TY-2482_chromosome | B7LX21 | Transposase                                                                                                    | Escherichia coli (strain 55989 / EAEC)            |
| 100491 | 3913084 | 3913380 TY-2482_chromosome | D3GX00 | Putative alcohol dehydrogenase (Fragment)                                                                      | Escherichia coli O44:H18 (strain 042 / EAEC)      |
| 105382 | 3914124 | 3913444 TY-2482_chromosome | B7LDT4 | Putative HTH regulator, TetR family                                                                            | Escherichia coli (strain 55989 / EAEC)            |
| 20824  | 3915503 | 3914164 TY-2482_chromosome | E9WYU6 | Putative uncharacterized protein                                                                               | Escherichia coli E482                             |
| 62213  | 3917686 | 3915686 TY-2482_chromosome | B7LDT5 | Betaine-carnitine-choline transporter family member BetU                                                       | Escherichia coli (strain 55989 / EAEC)            |
| 64167  | 3918973 | 3917837 TY-2482_chromosome | B7LDT8 | Putative uncharacterized protein                                                                               | Escherichia coli (strain 55989 / EAEC)            |
| 94859  | 3920098 | 3919157 TY-2482_chromosome | B7LDT9 | Lipid A biosynthesis (KDO)2-(Lauroyl)-lipid IVA acyltransferase 2 (EC 2.3.1.-)                                 | Escherichia coli (strain 55989 / EAEC)            |
| 88302  | 3921113 | 3920166 TY-2482_chromosome | B7LDU0 | Regulator of virG protein                                                                                      | Escherichia coli (strain 55989 / EAEC)            |
| 62707  | 3922206 | 3921121 TY-2482_chromosome | B7LDT7 | Glycosyl transferase                                                                                           | Escherichia coli (strain 55989 / EAEC)            |
| 9336   | 3923051 | 3922212 TY-2482_chromosome | Q9X692 | Shf                                                                                                            | Escherichia coli                                  |
| 23299  | 3923237 | 3924017 TY-2482_chromosome | Q6Q659 | Transposase                                                                                                    | Escherichia coli                                  |
| 8445   | 3924541 | 3924236 TY-2482_chromosome | P71290 | Orf58 protein                                                                                                  | Escherichia coli                                  |
| 52538  | 3924612 | 3926132 TY-2482_chromosome | B7LBU5 | Putative reverse transcriptase-like protein from putative prophage or plasmid (EC 2.7.7.49)                    | Escherichia coli (strain 55989 / EAEC)            |
| 23996  | 3926150 | 3926700 TY-2482_chromosome | Q072D8 | IS911 ORF2                                                                                                     | Shigella flexneri serotype 5b (strain 8401)       |
| 75632  | 3926630 | 3927040 TY-2482_chromosome | B7LDU8 | Putative uncharacterized protein yjHv                                                                          | Escherichia coli (strain 55989 / EAEC)            |
| 101396 | 3928368 | 3927604 TY-2482_chromosome | B7LDU9 | Iron-dicitrate transporter subunit ; ATP-binding component of ABC superfamily; KpLE2 phage-like elemen         | Escherichia coli (strain 55989 / EAEC)            |
| 80925  | 3929325 | 3928372 TY-2482_chromosome | B7LDV1 | Iron-dicitrate transporter subunit ; membrane component of ABC superfamily; KpLE2 phage-like elemen            | Escherichia coli (strain 55989 / EAEC)            |
| 108142 | 3930320 | 3929325 TY-2482_chromosome | B7LDV0 | Iron-dicitrate transporter subunit ; membrane component of ABC superfamily; KpLE2 phage-like elemen            | Escherichia coli (strain 55989 / EAEC)            |
| 95524  | 3931219 | 3930320 TY-2482_chromosome | B7LDV3 | Iron-dicitrate transporter subunit ; periplasmic-binding component of ABC superfamily; KpLE2 phage-like elemen | Escherichia coli (strain 55989 / EAEC)            |
| 99136  | 3933588 | 3931267 TY-2482_chromosome | B7LDV4 | Ferric citrate outer membrane transporter; KpLE2 phage-like element                                            | Escherichia coli (strain 55989 / EAEC)            |
| 113961 | 3934628 | 3933678 TY-2482_chromosome | B7LDV5 | Transmembrane signal transducer for ferric citrate transport; KpLE2 phage-like elemen                          | Escherichia coli (strain 55989 / EAEC)            |
| 77382  | 3935146 | 3934628 TY-2482_chromosome | B7LDV2 | RNA polymerase sigma factor                                                                                    | Escherichia coli (strain 55989 / EAEC)            |
| 17709  | 3935519 | 3935830 TY-2482_chromosome | D8A8G4 | Conserved domain protein                                                                                       | Escherichia coli MS 21-1                          |
| 14737  | 3936028 | 3936318 TY-2482_chromosome | B3Y1Q0 | Predicted protein                                                                                              | Escherichia coli O111:H-                          |
| 26395  | 3936693 | 3936487 TY-2482_chromosome | B7LDV7 | Putative uncharacterized protein                                                                               | Escherichia coli (strain 55989 / EAEC)            |
| 99138  | 3937057 | 3938427 TY-2482_chromosome | B7LDV8 | Putative uncharacterized protein                                                                               | Escherichia coli (strain 55989 / EAEC)            |
| 105017 | 3940054 | 3938672 TY-2482_chromosome | B7LDV9 | Putative uncharacterized protein                                                                               | Escherichia coli (strain 55989 / EAEC)            |
| 26478  | 3940676 | 3940107 TY-2482_chromosome | Q8XC14 | Putative IS encoded protein encoded within prophage CP-9330                                                    | Escherichia coli O157:H7                          |
| 16051  | 3941183 | 3940950 TY-2482_chromosome | B3Y1Q5 | Predicted protein                                                                                              | Escherichia coli O111:H-                          |
| 59090  | 3941704 | 3941186 TY-2482_chromosome | B7LDW2 | Putative uncharacterized protein                                                                               | Escherichia coli (strain 55989 / EAEC)            |

|        |         |                            |        |                                                                                                                        |                                                                    |
|--------|---------|----------------------------|--------|------------------------------------------------------------------------------------------------------------------------|--------------------------------------------------------------------|
| 26505  | 3941972 | 3942838 TY-2482_chromosome | A7ZVI3 | Putative uncharacterized protein                                                                                       | Escherichia coli O139:H28 (strain E24377A / ETEC                   |
| 62727  | 3942012 | 3941608 TY-2482_chromosome | B7LDW3 | Putative uncharacterized protein                                                                                       | Escherichia coli (strain 55989 / EAEC)                             |
| 25317  | 3943359 | 3943081 TY-2482_chromosome | E3PBJ5 | Putative uncharacterized protein                                                                                       | Escherichia coli O78:H11 (strain H10407 / ETEC                     |
| 26051  | 3943821 | 3944082 TY-2482_chromosome | Q0TGB3 | Putative uncharacterized protein                                                                                       | Escherichia coli O6:K15:H31 (strain 536 / UPEC                     |
| 115825 | 3944265 | 3944663 TY-2482_chromosome | B7LDW1 | Putative uncharacterized protein                                                                                       | Escherichia coli (strain 55989 / EAEC)                             |
| 80960  | 3944319 | 3944056 TY-2482_chromosome | B7LDW6 | Putative uncharacterized protein                                                                                       | Escherichia coli (strain 55989 / EAEC)                             |
| 75580  | 3944606 | 3945360 TY-2482_chromosome | C8TT51 | Conserved predicted protein                                                                                            | Escherichia coli O26:H11 (strain 11368 / EHEC                      |
| 108424 | 3945535 | 3945729 TY-2482_chromosome | B7LDW9 | Putative uncharacterized protein                                                                                       | Escherichia coli (strain 55989 / EAEC)                             |
| 12327  | 3946431 | 3946219 TY-2482_chromosome | C1HRB5 | Putative uncharacterized protein                                                                                       | Escherichia sp. 3_2_53FAA                                          |
| 26703  | 3946564 | 3947238 TY-2482_chromosome | B7LDX0 | Putative uncharacterized protein                                                                                       | Escherichia coli (strain 55989 / EAEC)                             |
| 14373  | 3947949 | 3947255 TY-2482_chromosome | E1U309 | Transposase InsAB'                                                                                                     | Escherichia coli                                                   |
| 65597  | 3949691 | 3948351 TY-2482_chromosome | B7LDX4 | Fructuronate transporter                                                                                               | Escherichia coli (strain 55989 / EAEC)                             |
| 73701  | 3949771 | 3950076 TY-2482_chromosome | B7LDX5 | Putative uncharacterized protein                                                                                       | Escherichia coli (strain 55989 / EAEC)                             |
| 34553  | 3950031 | 3951212 TY-2482_chromosome | B7LDX2 | Mannonate dehydratase (EC 4.2.1.8) (D-mannonate hydrolase)                                                             | Escherichia coli (strain 55989 / EAEC)                             |
| 99090  | 3951296 | 3952753 TY-2482_chromosome | B7LDX7 | D-mannonate oxidoreductase, NAD-binding (EC 1.1.1.57)                                                                  | Escherichia coli (strain 55989 / EAEC)                             |
| 69978  | 3952971 | 3953741 TY-2482_chromosome | B7LDX8 | DNA-binding transcriptional repressor                                                                                  | Escherichia coli (strain 55989 / EAEC)                             |
| 27950  | 3952972 | 3952781 TY-2482_chromosome | A8A849 | Putative uncharacterized protein                                                                                       | Escherichia coli O9:H4 (strain HS)                                 |
| 108076 | 3954715 | 3953888 TY-2482_chromosome | B7LDX9 | Putative uncharacterized protein yjiC                                                                                  | Escherichia coli (strain 55989 / EAEC)                             |
| 31668  | 3955387 | 3955776 TY-2482_chromosome | B7LDX6 | Anti-adaptor protein iraD                                                                                              | Escherichia coli (strain 55989 / EAEC)                             |
| 69980  | 3956683 | 3955775 TY-2482_chromosome | B7LDY2 | Putative DNA-binding transcriptional regulator                                                                         | Escherichia coli (strain 55989 / EAEC)                             |
| 58042  | 3957920 | 3956751 TY-2482_chromosome | B7LDY3 | Isoaspartyl dipeptidase (EC 3.4.19.5)                                                                                  | Escherichia coli (strain 55989 / EAEC)                             |
| 60871  | 3958394 | 3957936 TY-2482_chromosome | B7LDY4 | Putative uncharacterized protein yjiG                                                                                  | Escherichia coli (strain 55989 / EAEC)                             |
| 111249 | 3959086 | 3958394 TY-2482_chromosome | D3GXY1 | Putative transporter                                                                                                   | Escherichia coli O44:H18 (strain O42 / EAEC                        |
| 31795  | 3959324 | 3959875 TY-2482_chromosome | B7LDY6 | Probable RNA 2'-phosphotransferase (EC 2.7.1.-)                                                                        | Escherichia coli (strain 55989 / EAEC)                             |
| 91835  | 3961069 | 3959894 TY-2482_chromosome | B7LDY5 | Putative uncharacterized protein yjiI                                                                                  | Escherichia coli (strain 55989 / EAEC)                             |
| 112309 | 3962108 | 3961140 TY-2482_chromosome | C8U0T1 | Putative uncharacterized protein yjiK                                                                                  | Escherichia coli O103:H2 (strain 12009 / EHEC                      |
| 93942  | 3962319 | 3962065 TY-2482_chromosome | B7LDZ0 | Putative uncharacterized protein                                                                                       | Escherichia coli (strain 55989 / EAEC)                             |
| 100632 | 3963083 | 3962319 TY-2482_chromosome | B7LDY8 | ATPase, activator of (R)-hydroxyglutaryl-CoA dehydratase                                                               | Escherichia coli (strain 55989 / EAEC)                             |
| 66227  | 3964244 | 3963096 TY-2482_chromosome | B7LDZ2 | Putative 2-hydroxyglutaryl-CoA dehydratase (HgdB-like)                                                                 | Escherichia coli (strain 55989 / EAEC)                             |
| 106492 | 3965667 | 3964363 TY-2482_chromosome | B7LDZ3 | Putative uncharacterized protein yjiN                                                                                  | Escherichia coli (strain 55989 / EAEC)                             |
| 69345  | 3966913 | 3965684 TY-2482_chromosome | B7LDZ1 | Multidrug efflux system protein                                                                                        | Escherichia coli (strain 55989 / EAEC)                             |
| 19868  | 3967171 | 3967380 TY-2482_chromosome | E9TKV9 | Conserved domain protein                                                                                               | Escherichia coli MS 117-3                                          |
| 69982  | 3967380 | 3968333 TY-2482_chromosome | B7LDZ5 | Putative uncharacterized protein                                                                                       | Escherichia coli (strain 55989 / EAEC)                             |
| 105407 | 3969478 | 3968582 TY-2482_chromosome | C6UPC5 | Fused predicted DNA-binding transcriptional regulator, predicted aminotransferase                                      | Escherichia coli O157:H7 (strain TW14359 / EHEC                    |
| 94819  | 3969938 | 3969459 TY-2482_chromosome | B7LDZ4 | Fused putative DNA-binding transcriptional regulator; putative aminotransferase                                        | Escherichia coli (strain 55989 / EAEC)                             |
| 16654  | 3970376 | 3972466 TY-2482_chromosome | Q659X8 | Conserved protein                                                                                                      | Escherichia coli                                                   |
| 64099  | 3972914 | 3972519 TY-2482_chromosome | B7LQL5 | Endoribonuclease symE (EC 3.1.-.-)                                                                                     | Escherichia fergusonii (strain ATCC 35469 / DSM 13698 / CDC 0568-7 |
| 26571  | 3974814 | 3973081 TY-2482_chromosome | B7LE00 | Type I restriction enzyme EcoAI specificity protein (S protein) (S.EcoAI)                                              | Escherichia coli (strain 55989 / EAEC)                             |
| 60563  | 3976319 | 3974817 TY-2482_chromosome | B7LE01 | Type I restriction enzyme EcoEI M protein (M.EcoEI) (EC 2.1.1.72)                                                      | Escherichia coli (strain 55989 / EAEC)                             |
| 73840  | 3978782 | 3976353 TY-2482_chromosome | B7LE02 | Type I restriction enzyme EcoAI R protein (R.EcoAI) (EC 3.1.21.3)                                                      | Escherichia coli (strain 55989 / EAEC)                             |
| 115148 | 3979039 | 3980709 TY-2482_chromosome | B7LE03 | Putative uncharacterized protein                                                                                       | Escherichia coli (strain 55989 / EAEC)                             |
| 104631 | 3981737 | 3980784 TY-2482_chromosome | B7LDZ9 | Putative GTPase                                                                                                        | Escherichia coli (strain 55989 / EAEC)                             |
| 98989  | 3982077 | 3981751 TY-2482_chromosome | B7LE04 | Putative uncharacterized protein                                                                                       | Escherichia coli (strain 55989 / EAEC)                             |
| 58245  | 3984232 | 3982085 TY-2482_chromosome | B7LE05 | Putative uncharacterized protein yjiY                                                                                  | Escherichia coli (strain 55989 / EAEC)                             |
| 88483  | 3984609 | 3986270 TY-2482_chromosome | B7LE07 | Methyl-accepting chemotaxis protein I, serine sensor receptor                                                          | Escherichia coli (strain 55989 / EAEC)                             |
| 77525  | 3987683 | 3986325 TY-2482_chromosome | B7LE06 | Putative transporter                                                                                                   | Escherichia coli (strain 55989 / EAEC)                             |
| 62844  | 3988812 | 3987901 TY-2482_chromosome | B7LE08 | Putative DNA-binding transcriptional regulator                                                                         | Escherichia coli (strain 55989 / EAEC)                             |
| 78893  | 3988951 | 3989970 TY-2482_chromosome | B7LE09 | Putative oxidoreductase, Zn-dependent and NAD(P)-binding                                                               | Escherichia coli (strain 55989 / EAEC)                             |
| 32823  | 3992405 | 3990117 TY-2482_chromosome | B7LE10 | Phosphoglycerol transferase I (EC 2.7.8.20) (Phosphatidylglycerol--membrane-oligosaccharide glycerophosphotransferase) | Escherichia coli (strain 55989 / EAEC)                             |
| 68532  | 3993156 | 3992662 TY-2482_chromosome | C8UN70 | Conserved predicted protein                                                                                            | Escherichia coli O111:H- (strain 11128 / EHEC                      |
| 75556  | 3993939 | 3993205 TY-2482_chromosome | B7LE12 | DNA biosynthesis protein                                                                                               | Escherichia coli (strain 55989 / EAEC)                             |
| 30654  | 3994481 | 3993945 TY-2482_chromosome | B7LEK9 | Primosomal protein 1 (Primosomal protein I)                                                                            | Escherichia coli (strain 55989 / EAEC)                             |
| 110605 | 3995076 | 3994591 TY-2482_chromosome | B7LEL0 | UPF0442 protein yjiB                                                                                                   | Escherichia coli (strain 55989 / EAEC)                             |
| 86133  | 3995885 | 3995055 TY-2482_chromosome | D3GY05 | Putative membrane protein                                                                                              | Escherichia coli O44:H18 (strain O42 / EAEC                        |
| 98400  | 3996443 | 3997165 TY-2482_chromosome | B7LEL2 | Putative DNA-binding transcriptional regulator                                                                         | Escherichia coli (strain 55989 / EAEC)                             |
| 90840  | 3997126 | 3997800 TY-2482_chromosome | B5Z4P9 | Transcriptional regulator, LuxR family                                                                                 | Escherichia coli O157:H7 (strain EC4115 / EHEC                     |
| 99077  | 3998629 | 3997844 TY-2482_chromosome | B7LEL4 | Ferric iron reductase involved in ferric hydroxamate transport                                                         | Escherichia coli (strain 55989 / EAEC)                             |
| 88276  | 3998659 | 3999003 TY-2482_chromosome | B7LEL5 | Putative uncharacterized protein                                                                                       | Escherichia coli (strain 55989 / EAEC)                             |
| r209   | 3999131 | 3999045 TY-2482_chromosome |        | ref NC_010473 :4650800-4650886 Leu tRNA [gene=leuQ] [locus_tag=ECDH10B_4527                                            |                                                                    |
| r212   | 3999252 | 3999166 TY-2482_chromosome |        | ref NC_010473 :4650685-4650771 Leu tRNA [gene=leuP] [locus_tag=ECDH10B_4526                                            |                                                                    |
| r208   | 3999367 | 3999281 TY-2482_chromosome |        | ref NC_010473 :4650800-4650886 Leu tRNA [gene=leuQ] [locus_tag=ECDH10B_4527                                            |                                                                    |
| 33792  | 4000707 | 3999679 TY-2482_chromosome | B7LEL6 | Ribosomal RNA small subunit methyltransferase C (EC 2.1.1.172) (16S rRNA m2G1207 methyltransferase) (rRNA (guar        | Escherichia coli (strain 55989 / EAEC)                             |
| 75440  | 4000810 | 4001220 TY-2482_chromosome | B7LEL7 | DNA polymerase III, psi subunit (EC 2.7.7.7)                                                                           | Escherichia coli (strain 55989 / EAEC)                             |
| 102800 | 4001192 | 4001635 TY-2482_chromosome | B7LEL8 | Acetylase for 30S ribosomal subunit protein S18 (EC 2.3.1.128)                                                         | Escherichia coli (strain 55989 / EAEC)                             |

|        |         |                            |        |                                                                                                                       |                                                  |
|--------|---------|----------------------------|--------|-----------------------------------------------------------------------------------------------------------------------|--------------------------------------------------|
| 29324  | 4003647 | 4002160 TY-2482_chromosome | A7ZVR4 | Putative uncharacterized protein                                                                                      | Escherichia coli O139:H28 (strain E24377A / ETEC |
| 25412  | 4005062 | 4004373 TY-2482_chromosome | A7ZVR6 | Putative uncharacterized protein                                                                                      | Escherichia coli O139:H28 (strain E24377A / ETEC |
| 69959  | 4005418 | 4006488 TY-2482_chromosome | B7LEM3 | Putative esterase                                                                                                     | Escherichia coli (strain 55989 / EAEC)           |
| 59060  | 4006488 | 4007267 TY-2482_chromosome | B7LEM4 | Putative DNase                                                                                                        | Escherichia coli (strain 55989 / EAEC)           |
| 113934 | 4008363 | 4007503 TY-2482_chromosome | B7LEM5 | Putative pyruvate formate lyase activating enzyme                                                                     | Escherichia coli (strain 55989 / EAEC)           |
| 66219  | 4009885 | 4008338 TY-2482_chromosome | B7LEM6 | Putative uncharacterized protein yjjI                                                                                 | Escherichia coli (strain 55989 / EAEC)           |
| 30592  | 4010143 | 4010919 TY-2482_chromosome | B7LEM7 | Deoxyribose-phosphate aldolase (DERA) (EC 4.1.2.4) (2-deoxy-D-ribose 5-phosphate aldolase) (Phosphodeoxyriboaldolase) | Escherichia coli (strain 55989 / EAEC)           |
| 34400  | 4011000 | 4012319 TY-2482_chromosome | B7LEM8 | Thymidine phosphorylase (EC 2.4.2.4) (TdRPase)                                                                        | Escherichia coli (strain 55989 / EAEC)           |
| 30587  | 4012374 | 4013594 TY-2482_chromosome | B7LEM9 | Phosphopentomutase (EC 5.4.2.7) (Phosphodeoxyribomutase)                                                              | Escherichia coli (strain 55989 / EAEC)           |
| 30595  | 4013677 | 4014393 TY-2482_chromosome | B7LEN0 | Purine nucleoside phosphorylase deoD-type (PNP) (EC 2.4.2.1)                                                          | Escherichia coli (strain 55989 / EAEC)           |
| 85935  | 4014820 | 4014560 TY-2482_chromosome | D3GY25 | Putative transcriptional regulator                                                                                    | Escherichia coli O44:H18 (strain 042 / EAEC)     |
| 31947  | 4015868 | 4014855 TY-2482_chromosome | B7LEN2 | Lipoate-protein ligase A (EC 2.7.7.63) (Lipoate--protein ligase)                                                      | Escherichia coli (strain 55989 / EAEC)           |
| 69960  | 4016540 | 4015899 TY-2482_chromosome | B7LEN3 | Putative uncharacterized protein ytiB                                                                                 | Escherichia coli (strain 55989 / EAEC)           |
| 62713  | 4016646 | 4017611 TY-2482_chromosome | B7LEN4 | 3-phosphoserine phosphatase (EC 3.1.3.3)                                                                              | Escherichia coli (strain 55989 / EAEC)           |
| 105531 | 4017663 | 4019042 TY-2482_chromosome | B7LEN5 | DNA repair protein radA                                                                                               | Escherichia coli (strain 55989 / EAEC)           |
| 62714  | 4019066 | 4020295 TY-2482_chromosome | B7LEN6 | Bifunctional DNA-binding transcriptional repressor and NMN adenylyltransferase                                        | Escherichia coli (strain 55989 / EAEC)           |
| 115290 | 4022272 | 4020608 TY-2482_chromosome | B7LEN7 | Fused putative transporter subunits of ABC superfamily: ATP-binding components                                        | Escherichia coli (strain 55989 / EAEC)           |
| 101829 | 4022483 | 4024417 TY-2482_chromosome | B7LEN8 | Lytic murein transglycosylase, soluble (EC 3.2.1.-)                                                                   | Escherichia coli (strain 55989 / EAEC)           |
| 34356  | 4024510 | 4024833 TY-2482_chromosome | B7LEN9 | Trp operon repressor                                                                                                  | Escherichia coli (strain 55989 / EAEC)           |
| 65303  | 4025399 | 4024881 TY-2482_chromosome | B52456 | UPF0244 protein yjjX                                                                                                  | Escherichia coli O157:H7 (strain EC4115 / EHEC)  |
| 31206  | 4025442 | 4026086 TY-2482_chromosome | B7LEP1 | Probable phosphoglycerate mutase gpmB (EC 5.4.2.1) (PGAM) (Phosphoglyceromutase)                                      | Escherichia coli (strain 55989 / EAEC)           |
| 59061  | 4026955 | 4026089 TY-2482_chromosome | B7LEP2 | DNA-binding transcriptional activator                                                                                 | Escherichia coli (strain 55989 / EAEC)           |
| 100906 | 4027166 | 4027636 TY-2482_chromosome | B7LEP3 | Putative uncharacterized protein creA                                                                                 | Escherichia coli (strain 55989 / EAEC)           |
| 71433  | 4027652 | 4028338 TY-2482_chromosome | B7LEP4 | DNA-binding response regulator in two-component regulatory system with CreC                                           | Escherichia coli (strain 55989 / EAEC)           |
| 105016 | 4028341 | 4029762 TY-2482_chromosome | B7LEP5 | Sensory histidine kinase in two-component regulatory system with CreB or PhoB, regulator of the CreBC regulon         | Escherichia coli (strain 55989 / EAEC)           |
| 105239 | 4029823 | 4031172 TY-2482_chromosome | B7LEP6 | Inner membrane protein                                                                                                | Escherichia coli (strain 55989 / EAEC)           |
| 69559  | 4031951 | 4031238 TY-2482_chromosome | B7LEP7 | DNA-binding response regulator in two-component regulatory system with ArcB or CpxA                                   | Escherichia coli (strain 55989 / EAEC)           |
| 61509  | 4032587 | 4033270 TY-2482_chromosome | B7LEP9 | rRNA methyltransferase                                                                                                | Escherichia coli (strain 55989 / EAEC)           |
| 99208  | 4033633 | 4036092 TY-2482_chromosome | B7L4C7 | Fused aspartokinase I ; homoserine dehydrogenase I (EC 1.1.1.3) (EC 2.7.2.4)                                          | Escherichia coli (strain 55989 / EAEC)           |
| 31787  | 4036097 | 4037026 TY-2482_chromosome | B7L4C8 | Homoserine kinase (HK) (HSK) (EC 2.7.1.39)                                                                            | Escherichia coli (strain 55989 / EAEC)           |
| 98175  | 4037030 | 4038313 TY-2482_chromosome | B7L4C9 | Threonine synthase (EC 4.2.3.1)                                                                                       | Escherichia coli (strain 55989 / EAEC)           |
| 27095  | 4039017 | 4038609 TY-2482_chromosome | A7ZVW4 | Putative uncharacterized protein                                                                                      | Escherichia coli O9:H4 (strain HS)               |
| 34703  | 4039756 | 4038983 TY-2482_chromosome | B7L4D1 | UPF0246 protein yaaA                                                                                                  | Escherichia coli (strain 55989 / EAEC)           |
| 99211  | 4041256 | 4039829 TY-2482_chromosome | B7L4D2 | Putative amino acid sodium/proton transporter                                                                         | Escherichia coli (strain 55989 / EAEC)           |
| 105394 | 4041535 | 4042485 TY-2482_chromosome | B7L4D3 | Transaldolase 1 (EC 2.2.1.2)                                                                                          | Escherichia coli (strain 55989 / EAEC)           |
| 62835  | 4042603 | 4043187 TY-2482_chromosome | B7L4D4 | Molybdochelataze MogA, involved in Moco biosynthesis                                                                  | Escherichia coli (strain 55989 / EAEC)           |
| 60613  | 4043791 | 4043228 TY-2482_chromosome | B7L4D5 | Putative uncharacterized protein yaaH                                                                                 | Escherichia coli (strain 55989 / EAEC)           |
| 93929  | 4044653 | 4043943 TY-2482_chromosome | B7L4D6 | Heat shock protein                                                                                                    | Escherichia coli (strain 55989 / EAEC)           |
| 34706  | 4045083 | 4044682 TY-2482_chromosome | B7L4D7 | UPF0412 protein yaaI                                                                                                  | Escherichia coli (strain 55989 / EAEC)           |
| 88470  | 4045460 | 4047373 TY-2482_chromosome | B7L4D8 | Chaperone Hsp70, co-chaperone with DnaJ                                                                               | Escherichia coli (strain 55989 / EAEC)           |
| 30644  | 4047465 | 4048592 TY-2482_chromosome | B7L4D9 | Chaperone protein DnaJ                                                                                                | Escherichia coli (strain 55989 / EAEC)           |
| 46902  | 4048941 | 4048702 TY-2482_chromosome | D6I4R4 | Regulatory protein mokC                                                                                               | Escherichia coli B088                            |
| 102950 | 4049437 | 4050600 TY-2482_chromosome | B7L4E0 | Sodium-proton antiporter                                                                                              | Escherichia coli (strain 55989 / EAEC)           |
| 87364  | 4050663 | 4051565 TY-2482_chromosome | B7L4E1 | DNA-binding transcriptional activator                                                                                 | Escherichia coli (strain 55989 / EAEC)           |
| 90141  | 4052566 | 4051610 TY-2482_chromosome | B7L4E2 | Putative uncharacterized protein                                                                                      | Escherichia coli (strain 55989 / EAEC)           |
| 74863  | 4053910 | 4052582 TY-2482_chromosome | D3H3A6 | Fimbrial outer membrane usher protein                                                                                 | Escherichia coli O44:H18 (strain 042 / EAEC)     |
| 13230  | 4055577 | 4054106 TY-2482_chromosome | E9YZ54 | Putative uncharacterized protein                                                                                      | Escherichia coli M863                            |
| 25773  | 4055974 | 4056306 TY-2482_chromosome | Q1RG10 | Putative uncharacterized protein                                                                                      | Escherichia coli (strain UT189 / UPEC)           |
| 66307  | 4056427 | 4056642 TY-2482_chromosome | B7L4E6 | Putative uncharacterized protein yaaY                                                                                 | Escherichia coli (strain 55989 / EAEC)           |
| 101775 | 4056653 | 4057591 TY-2482_chromosome | B7L4E7 | Bifunctional riboflavin kinase and FAD synthetase (EC 2.7.1.26) (EC 2.7.7.2)                                          | Escherichia coli (strain 55989 / EAEC)           |
| 34119  | 4057637 | 4060450 TY-2482_chromosome | B7L4E8 | Isoleucyl-tRNA synthetase (EC 6.1.1.5) (Isoleucine--tRNA ligase) (IleRS)                                              | Escherichia coli (strain 55989 / EAEC)           |
| 31986  | 4060453 | 4060944 TY-2482_chromosome | B7L4E9 | Lipoprotein signal peptidase (EC 3.4.23.36) (Prolipoprotein signal peptidase) (Signal peptidase II) (SPase II)        | Escherichia coli (strain 55989 / EAEC)           |
| 91776  | 4061035 | 4061481 TY-2482_chromosome | B7L4F0 | Peptidyl-prolyl cis-trans isomerase (EC 5.2.1.8)                                                                      | Escherichia coli (strain 55989 / EAEC)           |
| 31704  | 4061486 | 4062433 TY-2482_chromosome | B7L4F1 | 4-hydroxy-3-methylbut-2-enyl diphosphate reductase (EC 1.17.1.2)                                                      | Escherichia coli (strain 55989 / EAEC)           |
| 33420  | 4062502 | 4063413 TY-2482_chromosome | B7L4F2 | Non-specific ribonucleoside hydrolase rihC (EC 3.2.-.-) (Purine/pyrimidine ribonucleoside hydrolase)                  | Escherichia coli (strain 55989 / EAEC)           |
| 30540  | 4063583 | 4064401 TY-2482_chromosome | B7L4F3 | Dihydrodipicolinate reductase (DHPR) (EC 1.3.1.26)                                                                    | Escherichia coli (strain 55989 / EAEC)           |
| 68039  | 4064860 | 4066005 TY-2482_chromosome | B7L4F4 | Carbamoyl-phosphate synthase small chain (EC 6.3.5.5) (Carbamoyl-phosphate synthetase glutamine chain)                | Escherichia coli (strain 55989 / EAEC)           |
| 75845  | 4066026 | 4069244 TY-2482_chromosome | B7L4F5 | Carbamoyl-phosphate synthase large chain (EC 6.3.5.5) (Carbamoyl-phosphate synthetase ammonia chain)                  | Escherichia coli (strain 55989 / EAEC)           |
| 8273   | 4069403 | 4069900 TY-2482_chromosome | C3TRD2 | Transcriptional regulator of cai operon                                                                               | Escherichia coli                                 |
| 90137  | 4069473 | 4069258 TY-2482_chromosome | B7L4F6 | Putative uncharacterized protein                                                                                      | Escherichia coli (strain 55989 / EAEC)           |
| 30223  | 4070579 | 4069992 TY-2482_chromosome | B7L4F8 | Carnitine operon protein CaiE                                                                                         | Escherichia coli (strain 55989 / EAEC)           |
| 59190  | 4071478 | 4070588 TY-2482_chromosome | B7L4F9 | Crotonobetainyl CoA hydratase (EC 4.2.1.-)                                                                            | Escherichia coli (strain 55989 / EAEC)           |
| 30207  | 4073032 | 4071482 TY-2482_chromosome | B7L4G0 | Probable crotonobetaine/carnitine-CoA ligase (EC 6.2.1.-)                                                             | Escherichia coli (strain 55989 / EAEC)           |
| 30204  | 4074323 | 4073109 TY-2482_chromosome | B7L4G1 | Crotonobetainyl-CoA:carnitine CoA-transferase (EC 2.8.3.-)                                                            | Escherichia coli (strain 55989 / EAEC)           |

|        |         |                            |        |                                                                                                                       |                                                 |
|--------|---------|----------------------------|--------|-----------------------------------------------------------------------------------------------------------------------|-------------------------------------------------|
| 30198  | 4075594 | 4074455 TY-2482_chromosome | B7L4G2 | Crotonobetainyl-CoA dehydrogenase (EC 1.3.99.-) (Crotonobetainyl-CoA reductase)                                       | Escherichia coli (strain 55989 / EAEC)          |
| 30229  | 4077139 | 4075628 TY-2482_chromosome | B7L4G3 | L-carnitine/gamma-butyrobetaine antiporter                                                                            | Escherichia coli (strain 55989 / EAEC)          |
| 62448  | 4077550 | 4078380 TY-2482_chromosome | B5YD05 | Protein FixA                                                                                                          | Escherichia coli O157:H7 (strain EC4115 / EHEC) |
| 30953  | 4078398 | 4079336 TY-2482_chromosome | B7L4G5 | Protein fixB                                                                                                          | Escherichia coli (strain 55989 / EAEC)          |
| 61108  | 4079390 | 4080673 TY-2482_chromosome | B7L4G6 | Putative oxidoreductase with FAD/NAD(P)-binding domain (EC 1.5.5.1)                                                   | Escherichia coli (strain 55989 / EAEC)          |
| 115677 | 4080673 | 4080957 TY-2482_chromosome | B7L4G7 | Putative 4Fe-4S ferredoxin                                                                                            | Escherichia coli (strain 55989 / EAEC)          |
| 109706 | 4081019 | 4082347 TY-2482_chromosome | B7L4G8 | Putative transporter                                                                                                  | Escherichia coli (strain 55989 / EAEC)          |
| 31778  | 4082458 | 4082985 TY-2482_chromosome | B7L4G9 | Glutathione-regulated potassium-efflux system ancillary protein keff                                                  | Escherichia coli (strain 55989 / EAEC)          |
| 31766  | 4082981 | 4084840 TY-2482_chromosome | B7L4H0 | Glutathione-regulated potassium-efflux system protein kefC (K+)/H(+) antiporter)                                      | Escherichia coli (strain 55989 / EAEC)          |
| 58941  | 4084924 | 4085511 TY-2482_chromosome | B5YZ84 | Dihydrofolate reductase (EC 1.5.1.3)                                                                                  | Escherichia coli O157:H7 (strain EC4115 / EHEC) |
| 29788  | 4086434 | 4085595 TY-2482_chromosome | B7L4H2 | Bis(5'-nucleosyl)-tetraphosphatase, symmetrical (EC 3.6.1.41) (Ap4A hydrolase) (Diadenosine 5',5''-P1,P4-tetraphospho | Escherichia coli (strain 55989 / EAEC)          |
| 29784  | 4086818 | 4086444 TY-2482_chromosome | B7L4H3 | Protein ApaG                                                                                                          | Escherichia coli (strain 55989 / EAEC)          |
| 33784  | 4087642 | 4086824 TY-2482_chromosome | B7L4H4 | Ribosomal RNA small subunit methyltransferase A (EC 2.1.1.182) (16S rRNA (adenine(1518)-N(6)/adenine(1519)-N(6)       | Escherichia coli (strain 55989 / EAEC)          |
| 32901  | 4088628 | 4087642 TY-2482_chromosome | B7L4H5 | 4-hydroxythreonine-4-phosphate dehydrogenase (EC 1.1.1.262) (4-(phosphohydroxy)-L-threonine dehydrogenase             | Escherichia coli (strain 55989 / EAEC)          |
| 65526  | 4089914 | 4088631 TY-2482_chromosome | B7L4H6 | Peptidyl-prolyl cis-trans isomerase (PPIase) (EC 5.2.1.8)                                                             | Escherichia coli (strain 55989 / EAEC)          |
| 82364  | 4092321 | 4089970 TY-2482_chromosome | B7L4H7 | LPS-assembly protein lptD (Organic solvent tolerance protein)                                                         | Escherichia coli (strain 55989 / EAEC)          |
| 114126 | 4092576 | 4093388 TY-2482_chromosome | B7L4H8 | DnaJ-like protein, membrane anchored                                                                                  | Escherichia coli (strain 55989 / EAEC)          |
| 69452  | 4094167 | 4093511 TY-2482_chromosome | B7L4H9 | Pseudouridine synthase (EC 5.4.99.-)                                                                                  | Escherichia coli (strain 55989 / EAEC)          |
| 33241  | 4097085 | 4094182 TY-2482_chromosome | B7L4I0 | RNA polymerase-associated protein rapA (EC 3.6.4.-) (ATP-dependent helicase hepA)                                     | Escherichia coli (strain 55989 / EAEC)          |
| 69900  | 4099601 | 4097253 TY-2482_chromosome | B7L4I1 | DNA polymerase (EC 2.7.7.7)                                                                                           | Escherichia coli (strain 55989 / EAEC)          |
| 69901  | 4100371 | 4099679 TY-2482_chromosome | B7L4I2 | L-ribulose-5-phosphate 4-epimerase (EC 5.1.3.4)                                                                       | Escherichia coli (strain 55989 / EAEC)          |
| 29797  | 4102042 | 4100543 TY-2482_chromosome | B7L4I3 | L-arabinose isomerase (EC 5.3.1.4)                                                                                    | Escherichia coli (strain 55989 / EAEC)          |
| 29801  | 4103753 | 4102056 TY-2482_chromosome | B7L4I4 | Ribulokinase (EC 2.7.1.16)                                                                                            | Escherichia coli (strain 55989 / EAEC)          |
| 24616  | 4103875 | 4104096 TY-2482_chromosome | D2NB21 | Putative uncharacterized protein                                                                                      | Escherichia coli O150:H5 (strain SE15)          |
| 58786  | 4104041 | 4104967 TY-2482_chromosome | B5YZA0 | Arabinose operon regulatory protein                                                                                   | Escherichia coli O157:H7 (strain EC4115 / EHEC) |
| 82424  | 4105056 | 4105817 TY-2482_chromosome | B7L4I6 | Putative uncharacterized protein yabl                                                                                 | Escherichia coli (strain 55989 / EAEC)          |
| 110505 | 4106632 | 4105937 TY-2482_chromosome | B7L4I7 | Thiamin transporter subunit ; ATP-binding component of ABC superfamily)                                               | Escherichia coli (strain 55989 / EAEC)          |
| 81097  | 4108226 | 4106619 TY-2482_chromosome | B7L4I8 | Fused thiamin transporter subunits of ABC superfamily; membrane components                                            | Escherichia coli (strain 55989 / EAEC)          |
| 102851 | 4109185 | 4108205 TY-2482_chromosome | B7L4I9 | Thiamin transporter subunit ; periplasmic-binding component of ABC superfamily)                                       | Escherichia coli (strain 55989 / EAEC)          |
| 62654  | 4111004 | 4109352 TY-2482_chromosome | B7L4J0 | DNA-binding transcriptional regulator                                                                                 | Escherichia coli (strain 55989 / EAEC)          |
| 109915 | 4111326 | 4112501 TY-2482_chromosome | B7L4J1 | Broad specificity sugar efflux system                                                                                 | Escherichia coli (strain 55989 / EAEC)          |
| 31868  | 4113158 | 4112556 TY-2482_chromosome | B7L4J2 | 3-isopropylmalate dehydratase small subunit (EC 4.2.1.33) (Alpha-IPM isomerase) (IPMI) (Isopropylmalate isomerase)    | Escherichia coli (strain 55989 / EAEC)          |
| 31864  | 4114569 | 4113172 TY-2482_chromosome | B7L4J3 | 3-isopropylmalate dehydratase large subunit (EC 4.2.1.33) (Alpha-IPM isomerase) (IPMI) (Isopropylmalate isomerase)    | Escherichia coli (strain 55989 / EAEC)          |
| 95564  | 4115663 | 4114575 TY-2482_chromosome | B7LFU4 | 3-isopropylmalate dehydrogenase (EC 1.1.1.85)                                                                         | Escherichia coli (strain 55989 / EAEC)          |
| 31856  | 4117234 | 4115666 TY-2482_chromosome | B7LFU5 | 2-isopropylmalate synthase (EC 2.3.3.13) (Alpha-IPM synthase) (Alpha-isopropylmalate synthase)                        | Escherichia coli (strain 55989 / EAEC)          |
| 62751  | 4118073 | 4119014 TY-2482_chromosome | B7LFU7 | DNA-binding transcriptional activator                                                                                 | Escherichia coli (strain 55989 / EAEC)          |
| 94238  | 4119335 | 4121056 TY-2482_chromosome | B7LFU8 | Acetolactate synthase (EC 2.2.1.6)                                                                                    | Escherichia coli (strain 55989 / EAEC)          |
| 106249 | 4121032 | 4121550 TY-2482_chromosome | B5YZB5 | Acetolactate synthase, small subunit, isozyme III (EC 2.2.1.6)                                                        | Escherichia coli O157:H7 (strain EC4115 / EHEC) |
| 62212  | 4121733 | 4122734 TY-2482_chromosome | B7LFV0 | DNA-binding transcriptional dual regulator                                                                            | Escherichia coli (strain 55989 / EAEC)          |
| 11223  | 4122903 | 4123103 TY-2482_chromosome | E6A074 | Putative uncharacterized protein                                                                                      | Escherichia coli MS 110-3                       |
| 32469  | 4123339 | 4123794 TY-2482_chromosome | B7LFV1 | Protein MraZ                                                                                                          | Escherichia coli (strain 55989 / EAEC)          |
| 33803  | 4123799 | 4124737 TY-2482_chromosome | B7LFV2 | Ribosomal RNA small subunit methyltransferase H (EC 2.1.1.199) (16S rRNA m(4)C1402 methyltransferase) (rRNA (cyt      | Escherichia coli (strain 55989 / EAEC)          |
| 101774 | 4124737 | 4125099 TY-2482_chromosome | B7LFV3 | Membrane bound cell division protein at septum containing leucine zipper motif                                        | Escherichia coli (strain 55989 / EAEC)          |
| 106500 | 4125118 | 4126881 TY-2482_chromosome | B7LFV4 | Transpeptidase involved in septal peptidoglycan synthesis (Penicillin-binding protein 3                               | Escherichia coli (strain 55989 / EAEC)          |
| 87357  | 4126871 | 4128355 TY-2482_chromosome | B7LFV5 | UDP-N-acetylmuramoyl-L-alanyl-D-glutamate:meso-diaminopimelate ligase (EC 6.3.2.13)                                   | Escherichia coli (strain 55989 / EAEC)          |
| 113181 | 4128355 | 4129710 TY-2482_chromosome | B7LFV6 | UDP-N-acetylmuramoyl-tripeptide--D-alanyl-D-alanine ligase (EC 6.3.2.10)                                              | Escherichia coli (strain 55989 / EAEC)          |
| 32465  | 4129707 | 4130786 TY-2482_chromosome | B7LFV7 | Phospho-N-acetylmuramoyl-pentapeptide-transferase (EC 2.7.8.13) (UDP-MurNAc-pentapeptide phosphotransferase           | Escherichia coli (strain 55989 / EAEC)          |
| 76273  | 4130792 | 4132105 TY-2482_chromosome | B7LFV8 | UDP-N-acetylmuramoylalanine--D-glutamate ligase (EC 6.3.2.9) (D-glutamic acid-adding enzyme) (UDP-N-acetylmuram       | Escherichia coli (strain 55989 / EAEC)          |
| 83497  | 4132108 | 4133349 TY-2482_chromosome | B7LFV9 | Integral membrane protein involved in stabilizing FtsZ ring during cell division                                      | Escherichia coli (strain 55989 / EAEC)          |
| 32554  | 4133349 | 4134413 TY-2482_chromosome | B7LFV0 | UDP-N-acetylglucosamine--N-acetylmuramyl-(pentapeptide) pyrophosphoryl-undecaprenol N-acetylglucosamine transfer      | Escherichia coli (strain 55989 / EAEC)          |
| 32542  | 4134470 | 4135942 TY-2482_chromosome | B7LFW1 | UDP-N-acetylmuramate--L-alanine ligase (EC 6.3.2.8) (UDP-N-acetylmuramoyl-L-alanine synthetase)                       | Escherichia coli (strain 55989 / EAEC)          |
| 64361  | 4135938 | 4136855 TY-2482_chromosome | B7LFW2 | D-alanine--D-alanine ligase 1 (EC 6.3.2.4) (D-Ala-D-Ala ligase 1) (D-alanylalanine synthetase 1)                      | Escherichia coli (strain 55989 / EAEC)          |
| 73600  | 4136860 | 4137687 TY-2482_chromosome | B7LFW3 | Membrane anchored protein involved in growth of wall at septum                                                        | Escherichia coli (strain 55989 / EAEC)          |
| 72952  | 4137687 | 4138946 TY-2482_chromosome | B7LFW4 | ATP-binding cell division protein involved in recruitment of FtsK to Z ring                                           | Escherichia coli (strain 55989 / EAEC)          |
| 61757  | 4139010 | 4140158 TY-2482_chromosome | B7LFW5 | Cell division protein ftsZ                                                                                            | Escherichia coli (strain 55989 / EAEC)          |
| 31972  | 4140262 | 4141176 TY-2482_chromosome | B7LFW6 | UDP-3-O-[3-hydroxymyristoyl] N-acetylglucosamine deacetylase (EC 3.5.1.-) (UDP-3-O-acyl-GlcNAc deacetylase)           | Escherichia coli (strain 55989 / EAEC)          |
| 98915  | 4141335 | 4141919 TY-2482_chromosome | B5YZD3 | Secretion monitor protein                                                                                             | Escherichia coli O157:H7 (strain EC4115 / EHEC) |
| 21928  | 4141405 | 4141154 TY-2482_chromosome | D6J5V7 | Predicted protein                                                                                                     | Escherichia coli B354                           |
| 33906  | 4141984 | 4144686 TY-2482_chromosome | B7LFW8 | Protein translocase subunit secA                                                                                      | Escherichia coli (strain 55989 / EAEC)          |
| 110666 | 4144749 | 4145135 TY-2482_chromosome | B7LFW9 | Nucleoside triphosphate pyrophosphohydrolase, marked preference for dGTP (EC 3.6.1.-)                                 | Escherichia coli (strain 55989 / EAEC)          |
| 106971 | 4145435 | 4145241 TY-2482_chromosome | C8TGN2 | UPF0243 zinc-binding protein yacG                                                                                     | Escherichia coli O26:H11 (strain 11368 / EHEC)  |
| 34709  | 4146188 | 4145448 TY-2482_chromosome | B7LFX0 | UPF0289 protein yacF                                                                                                  | Escherichia coli (strain 55989 / EAEC)          |
| 62162  | 4146808 | 4146191 TY-2482_chromosome | B7LFX1 | Dephospho-CoA kinase (EC 2.7.1.24)                                                                                    | Escherichia coli (strain 55989 / EAEC)          |
| 31312  | 4147033 | 4148073 TY-2482_chromosome | B7LFX2 | GMP reductase (EC 1.7.1.7) (Guanosine 5'-monophosphate oxidoreductase) (Guanosine monophosphate reductase)            | Escherichia coli (strain 55989 / EAEC)          |



|        |         |                            |                                |                                                                                                                                                                          |                                        |
|--------|---------|----------------------------|--------------------------------|--------------------------------------------------------------------------------------------------------------------------------------------------------------------------|----------------------------------------|
| 82640  | 4149313 | 4148114 TY-2482_chromosome | B7LFX3                         | Assembly protein in type IV pilin biogenesis, transmembrane protein                                                                                                      | Escherichia coli (strain 55989 / EAEC) |
| 78965  | 4150688 | 4149306 TY-2482_chromosome | B7LFX4                         | Putative uncharacterized protein hofB                                                                                                                                    | Escherichia coli (strain 55989 / EAEC) |
| 66257  | 4151138 | 4150701 TY-2482_chromosome | B7LFX5                         | Putative major pilin subunit                                                                                                                                             | Escherichia coli (strain 55989 / EAEC) |
| 11564  | 4151160 | 4151381 TY-2482_chromosome | D6I5W8                         | Putative uncharacterized protein                                                                                                                                         | Escherichia coli B354                  |
| 109506 | 4152234 | 4151344 TY-2482_chromosome | B7LFX6                         | Quinolinate phosphoribosyltransferase (EC 2.4.2.19)                                                                                                                      | Escherichia coli (strain 55989 / EAEC) |
| 78958  | 4152322 | 4152870 TY-2482_chromosome | B7LFX7                         | N-acetyl-anhydromuranmyl-L-alanine amidase (EC 3.5.1.28)                                                                                                                 | Escherichia coli (strain 55989 / EAEC) |
| 99132  | 4152870 | 4153721 TY-2482_chromosome | B7LFX8                         | Putative uncharacterized protein ampE                                                                                                                                    | Escherichia coli (strain 55989 / EAEC) |
| 86051  | 4155140 | 4153770 TY-2482_chromosome | B7LFX9                         | Aromatic amino acid transporter                                                                                                                                          | Escherichia coli (strain 55989 / EAEC) |
| 62760  | 4155681 | 4156442 TY-2482_chromosome | B7LFY0                         | DNA-binding transcriptional dual regulator                                                                                                                               | Escherichia coli (strain 55989 / EAEC) |
| 87695  | 4156606 | 4159266 TY-2482_chromosome | B7LFY1                         | Pyruvate dehydrogenase E1 component (EC 1.2.4.1)                                                                                                                         | Escherichia coli (strain 55989 / EAEC) |
| 81007  | 4159284 | 4161173 TY-2482_chromosome | B7LFY2                         | Pyruvate dehydrogenase, dihydrolipoyltransacetylase component E2 (EC 2.3.1.12)                                                                                           | Escherichia coli (strain 55989 / EAEC) |
| 59100  | 4161501 | 4162922 TY-2482_chromosome | B7LFY3                         | Dihydrolipoyl dehydrogenase (EC 1.8.1.4)                                                                                                                                 | Escherichia coli (strain 55989 / EAEC) |
| 116191 | 4164753 | 4162999 TY-2482_chromosome | B7LFY4                         | Putative uncharacterized protein yacH                                                                                                                                    | Escherichia coli (strain 55989 / EAEC) |
| 113338 | 4165108 | 4167702 TY-2482_chromosome | B7LFY5                         | Aconitate hydratase 2 (EC 4.2.1.3)                                                                                                                                       | Escherichia coli (strain 55989 / EAEC) |
| 34713  | 4167881 | 4168240 TY-2482_chromosome | B7LFY6                         | UPF0231 protein yacI                                                                                                                                                     | Escherichia coli (strain 55989 / EAEC) |
| 33991  | 4169075 | 4168284 TY-2482_chromosome | B7LFY7                         | S-adenosylmethionine decarboxylase proenzyme (AdoMetDC) (SAMDC) (EC 4.1.1.50) [Cleaved into: S-adenosylmethionine decarboxylase (EC 2.3.1.16)]                           | Escherichia coli (strain 55989 / EAEC) |
| 33995  | 4169957 | 4169094 TY-2482_chromosome | B7LFY8                         | Spermidine synthase (EC 2.5.1.16) (Putrescine aminopropyltransferase) (PAPT) (SPDSY)                                                                                     | Escherichia coli (strain 55989 / EAEC) |
| 114026 | 4170576 | 4172123 TY-2482_chromosome | B7LFZ0                         | Multicopper oxidase (Laccase)                                                                                                                                            | Escherichia coli (strain 55989 / EAEC) |
| 95545  | 4170581 | 4170066 TY-2482_chromosome | B7LFY9                         | Putative uncharacterized protein yacC                                                                                                                                    | Escherichia coli (strain 55989 / EAEC) |
| 69996  | 4174563 | 4172176 TY-2482_chromosome | B7LFZ1                         | Glucose dehydrogenase (EC 1.1.5.2)                                                                                                                                       | Escherichia coli (strain 55989 / EAEC) |
| 106528 | 4174769 | 4175302 TY-2482_chromosome | B7LGP1                         | Hypoxanthine phosphoribosyltransferase (EC 2.4.2.8)                                                                                                                      | Escherichia coli (strain 55989 / EAEC) |
| 79100  | 4176008 | 4175349 TY-2482_chromosome | B7LG18                         | Carbonic anhydrase (EC 4.2.1.1)                                                                                                                                          | Escherichia coli (strain 55989 / EAEC) |
| 106521 | 4176117 | 4177040 TY-2482_chromosome | B7LG19                         | Putative transporter subunit: ATP-binding component of ABC superfamily                                                                                                   | Escherichia coli (strain 55989 / EAEC) |
| 61210  | 4177040 | 4177807 TY-2482_chromosome | B7LG10                         | Putative transporter subunit: membrane component of ABC superfamily                                                                                                      | Escherichia coli (strain 55989 / EAEC) |
| 71421  | 4177915 | 4178352 TY-2482_chromosome | B7LG11                         | Putative PTS Enzyme IIA                                                                                                                                                  | Escherichia coli (strain 55989 / EAEC) |
| 88320  | 4178419 | 4179645 TY-2482_chromosome | B7LG12                         | Putative exported polysaccharide deacetylase                                                                                                                             | Escherichia coli (strain 55989 / EAEC) |
| 32858  | 4180032 | 4179655 TY-2482_chromosome | B7LG13                         | Aspartate 1-decarboxylase (EC 4.1.1.11) (Aspartate alpha-decarboxylase) [Cleaved into: Aspartate 1-decarboxylase (EC 4.1.1.11)]                                          | Escherichia coli (strain 55989 / EAEC) |
| 70050  | 4180306 | 4181205 TY-2482_chromosome | B7LG14                         | Putative transposase                                                                                                                                                     | Escherichia coli (strain 55989 / EAEC) |
| 32854  | 4182133 | 4181285 TY-2482_chromosome | B7LG15                         | Pantothenate synthetase (PS) (EC 6.3.2.1) (Pantoate-beta-alanine ligase) (Pantoate-activating enzyme)                                                                    | Escherichia coli (strain 55989 / EAEC) |
| 32850  | 4182939 | 4182148 TY-2482_chromosome | B7LG16                         | 3-methyl-2-oxobutanoate hydroxymethyltransferase (EC 2.1.2.11) (Ketopantoate hydroxymethyltransferase) (KPHMT)                                                           | Escherichia coli (strain 55989 / EAEC) |
| 90198  | 4184326 | 4183055 TY-2482_chromosome | B7LG17                         | Putative exported protein, putative fimbrial-like adhesin protein                                                                                                        | Escherichia coli (strain 55989 / EAEC) |
| 110419 | 4184975 | 4184382 TY-2482_chromosome | B7LG18                         | Putative fimbrial-like adhesin protein                                                                                                                                   | Escherichia coli (strain 55989 / EAEC) |
| 106524 | 4185604 | 4185005 TY-2482_chromosome | B7LG19                         | Putative fimbrial-like adhesin protein                                                                                                                                   | Escherichia coli (strain 55989 / EAEC) |
| 94123  | 4186188 | 4185622 TY-2482_chromosome | B7LGK0                         | Putative fimbrial-like adhesin exported protein                                                                                                                          | Escherichia coli (strain 55989 / EAEC) |
| 68441  | 4188769 | 4186169 TY-2482_chromosome | Q8Z9C7                         | Outer membrane usher protein HtrE                                                                                                                                        | Salmonella typhi                       |
| 108562 | 4189580 | 4188843 TY-2482_chromosome | B7LGK2                         | Periplasmic pilin chaperone                                                                                                                                              | Escherichia coli (strain 55989 / EAEC) |
| 114071 | 4190269 | 4189688 TY-2482_chromosome | B7LGK3                         | Putative fimbrial-like adhesin exported protein                                                                                                                          | Escherichia coli (strain 55989 / EAEC) |
| 62136  | 4191118 | 4190642 TY-2482_chromosome | B7LGK4                         | 2-amino-4-hydroxy-6-hydroxymethylidihydropteridine pyrophosphokinase (EC 2.7.6.3)                                                                                        | Escherichia coli (strain 55989 / EAEC) |
| 91406  | 4192533 | 4191118 TY-2482_chromosome | B7LGK5                         | Poly(A) polymerase I (EC 2.7.7.19)                                                                                                                                       | Escherichia coli (strain 55989 / EAEC) |
| 102835 | 4193498 | 4192575 TY-2482_chromosome | B7LGK6                         | Glutamyl-Q tRNA(Asp) synthetase (Glu-Q-Rs) (EC 6.1.1.-)                                                                                                                  | Escherichia coli (strain 55989 / EAEC) |
| 11257  | 4193990 | 4193468 TY-2482_chromosome | E7IEQ9                         | DnaK transcriptional regulator DksA                                                                                                                                      | Escherichia coli LT-68                 |
| 33931  | 4194872 | 4194171 TY-2482_chromosome | B7LGK8                         | Sugar fermentation stimulation protein A                                                                                                                                 | Escherichia coli (strain 55989 / EAEC) |
| 73737  | 4195491 | 4197917 TY-2482_chromosome | B7LGL0                         | ATP-dependent (RNA) helicase                                                                                                                                             | Escherichia coli (strain 55989 / EAEC) |
| 106525 | 4198116 | 4200647 TY-2482_chromosome | B7LGL1                         | Fused glycosyl transferase ; transpeptidase (EC 2.4.1.129) (EC 3.4.-.-)                                                                                                  | Escherichia coli (strain 55989 / EAEC) |
| 73739  | 4200870 | 4203110 TY-2482_chromosome | B7LGL2                         | Ferrichrome outer membrane transporter                                                                                                                                   | Escherichia coli (strain 55989 / EAEC) |
| 75960  | 4203164 | 4203958 TY-2482_chromosome | B7LGL3                         | Iron-hydroxamate transporter subunit ; ATP-binding component of ABC superfamily                                                                                          | Escherichia coli (strain 55989 / EAEC) |
| 70056  | 4203961 | 4204848 TY-2482_chromosome | B7LGL4                         | Iron-hydroxamate transporter subunit ; periplasmic-binding component of ABC superfamily                                                                                  | Escherichia coli (strain 55989 / EAEC) |
| 106527 | 4204848 | 4206827 TY-2482_chromosome | B7LGL5                         | Fused iron-hydroxamate transporter subunits of ABC superfamily: membrane components                                                                                      | Escherichia coli (strain 55989 / EAEC) |
| 31232  | 4208145 | 4206868 TY-2482_chromosome | B7LGL6                         | Glutamate-1-semialdehyde 2,1-aminomutase (GSA) (EC 5.4.3.8) [Glutamate-1-semialdehyde aminotransferase) (GSA-1)]                                                         | Escherichia coli (strain 55989 / EAEC) |
| 30317  | 4208370 | 4209788 TY-2482_chromosome | B7LGL7                         | H(+)/Cl(-) exchange transporter ClcA                                                                                                                                     | Escherichia coli (strain 55989 / EAEC) |
| 30787  | 4209873 | 4210214 TY-2482_chromosome | B7LGL8                         | Iron-sulfur cluster insertion protein erpA                                                                                                                               | Escherichia coli (strain 55989 / EAEC) |
| 84608  | 4210887 | 4210267 TY-2482_chromosome | B7LGL9                         | Putative uncharacterized protein yadS                                                                                                                                    | Escherichia coli (strain 55989 / EAEC) |
| 73740  | 4211725 | 4210928 TY-2482_chromosome | B7LGM0                         | Vitamin B12 transporter subunit: periplasmic-binding component of ABC superfamily                                                                                        | Escherichia coli (strain 55989 / EAEC) |
| 32514  | 4212416 | 4211721 TY-2482_chromosome | B7LGM1                         | 5'-methylthioadenosine/S-adenosylhomocysteine nucleosidase (MTA/SAH nucleosidase) (MTAN) (EC 3.2.2.9) [5'-methylthioadenosine/S-adenosylhomocysteine nucleosidase (MTN)] | Escherichia coli (strain 55989 / EAEC) |
| 30606  | 4212500 | 4214014 TY-2482_chromosome | B7LGM2                         | Deoxyguanosinetriphosphate triphosphohydrolase (dGTP triphosphohydrolase) (dGTPase) (EC 3.1.5.1)                                                                         | Escherichia coli (strain 55989 / EAEC) |
| 109926 | 4214147 | 4215568 TY-2482_chromosome | B7LGM3                         | Serine endoprotease (Protease Do), membrane-associated (EC 3.4.21.-)                                                                                                     | Escherichia coli (strain 55989 / EAEC) |
| 60679  | 4215726 | 4216880 TY-2482_chromosome | B7LGM4                         | DNA-binding transcriptional activator                                                                                                                                    | Escherichia coli (strain 55989 / EAEC) |
| 34716  | 4217358 | 4216975 TY-2482_chromosome | B7LGM5                         | UPF0325 protein yaeH                                                                                                                                                     | Escherichia coli (strain 55989 / EAEC) |
| 88508  | 4218497 | 4217676 TY-2482_chromosome | B7LGM6                         | 2,3,4,5-tetrahydropyridine-2,6-dicarboxylate N-succinyltransferase (EC 2.3.1.117) (Tetrahydrodipicolinate N-succinyltransferase)                                         | Escherichia coli (strain 55989 / EAEC) |
| 31145  | 4221200 | 4218531 TY-2482_chromosome | B7LGM7                         | [Protein-Pil] uridylyltransferase (Pil uridylyl-transferase) (EC 2.7.7.59) (UTase) (Uridylyl-removing enzyme)                                                            | Escherichia coli (strain 55989 / EAEC) |
| 84609  | 4222056 | 4221265 TY-2482_chromosome | B7LGM8                         | Methionine aminopeptidase (EC 3.4.11.18)                                                                                                                                 | Escherichia coli (strain 55989 / EAEC) |
| r121   | 4222262 | 4222397 TY-2482_chromosome | ref NC_010473 :163816-163951 - | [gene=tff] [locus_tag=ECDH10B_0148]                                                                                                                                      |                                        |
| 24429  | 4222277 | 4222059 TY-2482_chromosome | B7LGM9                         | Putative uncharacterized protein                                                                                                                                         | Escherichia coli (strain 55989 / EAEC) |
| 33744  | 4222424 | 4223146 TY-2482_chromosome | B7LGN0                         | 30S ribosomal protein S2                                                                                                                                                 | Escherichia coli (strain 55989 / EAEC) |

|        |         |                            |               |                                                                                                                     |                                                    |
|--------|---------|----------------------------|---------------|---------------------------------------------------------------------------------------------------------------------|----------------------------------------------------|
| 27173  | 4224153 | 4223104 TY-2482_chromosome | A1A7L4        | Putative uncharacterized protein                                                                                    | Escherichia coli O1:K1 / APEC                      |
| 105623 | 4224405 | 4225127 TY-2482_chromosome | B7LGN2        | Uridylate kinase (EC 2.7.4.-)                                                                                       | Escherichia coli (strain 55989 / EAEC)             |
| 33691  | 4225422 | 4225976 TY-2482_chromosome | B7LGN3        | Ribosome-recycling factor (RRF) (Ribosome-releasing factor)                                                         | Escherichia coli (strain 55989 / EAEC)             |
| 93720  | 4226071 | 4227264 TY-2482_chromosome | B7LGN4        | 1-deoxy-D-xylulose 5-phosphate reductoisomerase (DXP reductoisomerase) (EC 1.1.1.267) (1-deoxyxylulose-5-phosph     | Escherichia coli (strain 55989 / EAEC)             |
| 66241  | 4227453 | 4228211 TY-2482_chromosome | B7LGN5        | Undecaprenyl pyrophosphate synthase (EC 2.5.1.31)                                                                   | Escherichia coli (strain 55989 / EAEC)             |
| 90025  | 4228227 | 4229081 TY-2482_chromosome | B7LGN6        | Phosphatidate cytidyltransferase (EC 2.7.7.41)                                                                      | Escherichia coli (strain 55989 / EAEC)             |
| 114072 | 4229096 | 4230445 TY-2482_chromosome | B7LGN7        | Zinc metalloproteinase (EC 3.4.24.-)                                                                                | Escherichia coli (strain 55989 / EAEC)             |
| 34722  | 4230478 | 4232907 TY-2482_chromosome | B7LGN8        | Outer membrane protein assembly factor yaeT                                                                         | Escherichia coli (strain 55989 / EAEC)             |
| 102147 | 4233032 | 4233514 TY-2482_chromosome | B7LGN9        | Periplasmic chaperone                                                                                               | Escherichia coli (strain 55989 / EAEC)             |
| 57950  | 4233521 | 4234543 TY-2482_chromosome | B7LGP0        | UDP-3-O-[3-hydroxymyristoyl] glucosamine N-acyltransferase (EC 2.3.1.-)                                             | Escherichia coli (strain 55989 / EAEC)             |
| 9284   | 4234579 | 4235103 TY-2482_chromosome | Q14F34        | FabZ (Fragment)                                                                                                     | Escherichia coli                                   |
| 31964  | 4235110 | 4235895 TY-2482_chromosome | B7LGP3        | Acyl-[acyl-carrier-protein]-UDP-N-acetylglucosamine O-acyltransferase (UDP-N-acetylglucosamine acyltransferase) (E  | Escherichia coli (strain 55989 / EAEC)             |
| 31968  | 4235898 | 4237043 TY-2482_chromosome | B7LGP4        | Lipid-A-disaccharide synthase (EC 2.4.1.182)                                                                        | Escherichia coli (strain 55989 / EAEC)             |
| 33639  | 4237043 | 4237636 TY-2482_chromosome | B7LGP5        | Ribonuclease HII (RNase HII) (EC 3.1.26.4)                                                                          | Escherichia coli (strain 55989 / EAEC)             |
| 59151  | 4237676 | 4241155 TY-2482_chromosome | B7LGP6        | DNA polymerase III alpha subunit (EC 2.7.7.7)                                                                       | Escherichia coli (strain 55989 / EAEC)             |
| 29678  | 4241171 | 4242127 TY-2482_chromosome | B7LGP7        | Acetyl-coenzyme A carboxylase carboxyl transferase subunit alpha (ACCCase subunit alpha) (Acetyl-CoA carboxylase ca | Escherichia coli (strain 55989 / EAEC)             |
| 73741  | 4242229 | 4244367 TY-2482_chromosome | B7LGP8        | Lysine decarboxylase 2, constitutive (EC 4.1.1.18)                                                                  | Escherichia coli (strain 55989 / EAEC)             |
| 88422  | 4244427 | 4244813 TY-2482_chromosome | B7LGP9        | Putative S-C lyase                                                                                                  | Escherichia coli (strain 55989 / EAEC)             |
| 95612  | 4244881 | 4246176 TY-2482_chromosome | B7LGQ0        | tRNA(Ile)-lysidine synthase (EC 6.3.4.-) (tRNA(Ile)-2-lysidine synthase) (tRNA(Ile)-lysidine synthetase)            | Escherichia coli (strain 55989 / EAEC)             |
| 113720 | 4246488 | 4246231 TY-2482_chromosome | B520G8        | Rof protein                                                                                                         | Escherichia coli O157:H7 (strain EC4115 / EHEC)    |
| 34719  | 4246675 | 4246478 TY-2482_chromosome | B7LGQ2        | UPF0253 protein yaeP                                                                                                | Escherichia coli (strain 55989 / EAEC)             |
| 105030 | 4246841 | 4247383 TY-2482_chromosome | B7LGQ3        | Putative uncharacterized protein yaeQ                                                                               | Escherichia coli (strain 55989 / EAEC)             |
| 115299 | 4247383 | 4247802 TY-2482_chromosome | B7LGQ4        | Putative uncharacterized protein yaeJ                                                                               | Escherichia coli (strain 55989 / EAEC)             |
| 69928  | 4247819 | 4248526 TY-2482_chromosome | B7LGQ5        | Lipoprotein involved with copper homeostasis and adhesior                                                           | Escherichia coli (strain 55989 / EAEC)             |
| 115755 | 4248779 | 4249756 TY-2482_chromosome | B7LF78        | Transposase, IS110 family                                                                                           | Escherichia coli (strain 55989 / EAEC)             |
| 17378  | 4250786 | 4250208 TY-2482_chromosome | E7H755        | YaeF                                                                                                                | Escherichia coli EPECa14                           |
| 34159  | 4252557 | 4250842 TY-2482_chromosome | B7LHA4        | Prolyl-tRNA synthetase (EC 6.1.1.15) (Proline--tRNA ligase) (ProRS)                                                 | Escherichia coli (strain 55989 / EAEC)             |
| 70073  | 4253376 | 4252672 TY-2482_chromosome | B7LHA5        | Putative uncharacterized protein yaeB                                                                               | Escherichia coli (strain 55989 / EAEC)             |
| 112383 | 4253777 | 4253376 TY-2482_chromosome | B7LHA6        | Putative uncharacterized protein rcsF                                                                               | Escherichia coli (strain 55989 / EAEC)             |
| 91355  | 4254710 | 4253898 TY-2482_chromosome | B7LHA7        | DL-methionine transporter subunit ; periplasmic-binding component of ABC superfamily                                | Escherichia coli (strain 55989 / EAEC)             |
| 72138  | 4255403 | 4254753 TY-2482_chromosome | B7LHA8        | DL-methionine transporter subunit ; membrane component protein of ABC superfamily                                   | Escherichia coli (strain 55989 / EAEC)             |
| 73770  | 4256427 | 4255399 TY-2482_chromosome | B7LHA9        | DL-methionine transporter subunit ; ATP-binding component of ABC superfamily                                        | Escherichia coli (strain 55989 / EAEC)             |
| 95434  | 4256615 | 4257184 TY-2482_chromosome | B7LHB0        | D,D-heptose 1,7-bisphosphate phosphatase                                                                            | Escherichia coli (strain 55989 / EAEC)             |
| r55    | 4257551 | 4259092 TY-2482_chromosome | ref NC_010473 | :3522988-3524529 165 ribosomal RNA   [gene=rrsD] [locus_tag=ECDH10B_3453                                            |                                                    |
| 11308  | 4257697 | 4257464 TY-2482_chromosome | E9WNY3        | Putative uncharacterized protein                                                                                    | Escherichia coli E1520                             |
| 25830  | 4258672 | 4258989 TY-2482_chromosome | Q57H85        | ORF16-lacZ fusion protein                                                                                           | Salmonella choleraesuis                            |
| r244   | 4259161 | 4259237 TY-2482_chromosome | ref NC_010473 | :4134084-4134160 Ile tRNA   [gene=ileT] [locus_tag=ECDH10B_4041                                                     |                                                    |
| r330   | 4259280 | 4259355 TY-2482_chromosome | ref NC_010473 | :4134203-4134278 Ala tRNA   [gene=alaT] [locus_tag=ECDH10B_4042                                                     |                                                    |
| r2     | 4259539 | 4262442 TY-2482_chromosome | ref NC_010473 | :4307762-4310665 23S ribosomal RNA   [gene=rrlE] [locus_tag=ECDH10B_4198                                            |                                                    |
| 24094  | 4260067 | 4259765 TY-2482_chromosome | Q1R3T8        | Putative uncharacterized protein                                                                                    | Escherichia coli (strain UT189 / UPEC)             |
| 13802  | 4261328 | 4261125 TY-2482_chromosome | C1HUN3        | Putative uncharacterized protein                                                                                    | Escherichia sp. 3_2_53FAA                          |
| 20478  | 4261857 | 4261405 TY-2482_chromosome | C1HUN1        | Cell wall-associated hydrolase (Fragment)                                                                           | Escherichia sp. 3_2_53FAA                          |
| 22412  | 4262217 | 4261861 TY-2482_chromosome | C1HUN0        | Prolipoprotein diacylglycerol transferase (Fragment)                                                                | Escherichia sp. 3_2_53FAA                          |
| r131   | 4262536 | 4262655 TY-2482_chromosome | ref NC_010473 | :4043643-4043762 5S ribosomal RNA   [gene=rrfC] [locus_tag=ECDH10B_3948                                             |                                                    |
| 29585  | 4262760 | 4263032 TY-2482_chromosome | B7LHB1        | Putative uncharacterized protein                                                                                    | Escherichia coli (strain 55989 / EAEC)             |
| r249   | 4262847 | 4262923 TY-2482_chromosome | ref NC_010473 | :4043815-4043891 Asp tRNA   [gene=aspT] [locus_tag=ECDH10B_3949]                                                    |                                                    |
| 88306  | 4263085 | 4263885 TY-2482_chromosome | B7LHB2        | 2,5-diketo-D-gluconate reductase B (EC 1.1.1.274)                                                                   | Escherichia coli (strain 55989 / EAEC)             |
| 113545 | 4264799 | 4263888 TY-2482_chromosome | B7LHB4        | Putative DNA-binding transcriptional regulator                                                                      | Escherichia coli (strain 55989 / EAEC)             |
| 34726  | 4265040 | 4265837 TY-2482_chromosome | B7LHB5        | UPF0294 protein yafD                                                                                                | Escherichia coli (strain 55989 / EAEC)             |
| 102940 | 4265918 | 4266685 TY-2482_chromosome | B7LHB6        | Putative S-adenosyl-L-methionine-dependent methyltransferase                                                        | Escherichia coli (strain 55989 / EAEC)             |
| 70102  | 4268094 | 4266739 TY-2482_chromosome | B7LHB7        | Membrane-bound lytic murein transglycosylase D (EC 3.2.1.-)                                                         | Escherichia coli (strain 55989 / EAEC)             |
| 31152  | 4268921 | 4268169 TY-2482_chromosome | B7LHB8        | Hydroxyacylglutathione hydrolase (EC 3.1.2.6) (Glyoxalase II) (Glx II)                                              | Escherichia coli (strain 55989 / EAEC)             |
| 102941 | 4268955 | 4269674 TY-2482_chromosome | B7LHB9        | Putative S-adenosyl-L-methionine-dependent methyltransferase                                                        | Escherichia coli (strain 55989 / EAEC)             |
| 113262 | 4270197 | 4270934 TY-2482_chromosome | D3GS43        | DNA polymerase III epsilon subunit                                                                                  | Escherichia coli O44:H18 (strain O42 / EAEC)       |
| 15676  | 4270252 | 4269677 TY-2482_chromosome | C4X416        | Ribonuclease H (RNase H) (EC 3.1.26.4)                                                                              | Klebsiella pneumoniae subsp. pneumoniae NTUH-K2044 |
| r250   | 4271070 | 4271146 TY-2482_chromosome | ref NC_010473 | :4043815-4043891 Asp tRNA   [gene=aspT] [locus_tag=ECDH10B_3949]                                                    |                                                    |
| 27948  | 4271153 | 4270842 TY-2482_chromosome | A1A7Q7        | Putative uncharacterized protein                                                                                    | Escherichia coli O1:K1 / APEC                      |
| 97065  | 4271473 | 4272255 TY-2482_chromosome | B7LHC2        | Putative aminopeptidase                                                                                             | Escherichia coli (strain 55989 / EAEC)             |
| 90311  | 4272874 | 4272398 TY-2482_chromosome | C8THN8        | Conserved predicted protein                                                                                         | Escherichia coli O26:H11 (strain 11368 / EHEC)     |
| 27355  | 4273813 | 4272887 TY-2482_chromosome | B7LHC3        | Inner membrane protein yafU                                                                                         | Escherichia coli (strain 55989 / EAEC)             |
| 60680  | 4274324 | 4273845 TY-2482_chromosome | B7LHC4        | Putative uncharacterized protein                                                                                    | Escherichia coli (strain 55989 / EAEC)             |
| 70074  | 4275790 | 4274351 TY-2482_chromosome | B7LHC5        | Putative uncharacterized protein                                                                                    | Escherichia coli (strain 55989 / EAEC)             |
| 26996  | 4279235 | 4275714 TY-2482_chromosome | B7LHC6        | IcmF-like protein                                                                                                   | Escherichia coli (strain 55989 / EAEC)             |
| 78665  | 4280735 | 4279257 TY-2482_chromosome | B7LHC7        | Putative uncharacterized protein                                                                                    | Escherichia coli (strain 55989 / EAEC)             |

|        |         |                            |                                                                              |                                                                                                              |                                                |
|--------|---------|----------------------------|------------------------------------------------------------------------------|--------------------------------------------------------------------------------------------------------------|------------------------------------------------|
| 67968  | 4281417 | 4280677 TY-2482_chromosome | B7LHC8                                                                       | Putative uncharacterized protein                                                                             | Escherichia coli (strain 55989 / EAEC)         |
| 84614  | 4284287 | 4281417 TY-2482_chromosome | B7LHC9                                                                       | Putative ATP-dependent Clp proteinase Aec27 ATP-binding chain, with chaperone activity                       | Escherichia coli (strain 55989 / EAEC)         |
| 94063  | 4284943 | 4284185 TY-2482_chromosome | B7LHD0                                                                       | Putative membrane protein Aec26                                                                              | Escherichia coli (strain 55989 / EAEC)         |
| 59164  | 4286279 | 4284951 TY-2482_chromosome | B7LHD1                                                                       | Putative uncharacterized protein                                                                             | Escherichia coli (strain 55989 / EAEC)         |
| 82641  | 4286806 | 4286285 TY-2482_chromosome | B7LHD2                                                                       | Putative uncharacterized protein                                                                             | Escherichia coli (strain 55989 / EAEC)         |
| 59165  | 4288104 | 4286806 TY-2482_chromosome | B7LHD3                                                                       | Putative uncharacterized protein                                                                             | Escherichia coli (strain 55989 / EAEC)         |
| 116130 | 4289196 | 4288111 TY-2482_chromosome | B7LHD4                                                                       | Putative uncharacterized protein                                                                             | Escherichia coli (strain 55989 / EAEC)         |
| 99178  | 4291004 | 4289157 TY-2482_chromosome | B7LHD5                                                                       | Putative uncharacterized protein                                                                             | Escherichia coli (strain 55989 / EAEC)         |
| 94129  | 4291421 | 4291011 TY-2482_chromosome | B7LHD6                                                                       | Putative uncharacterized protein                                                                             | Escherichia coli (strain 55989 / EAEC)         |
| 79168  | 4292903 | 4291431 TY-2482_chromosome | B7LHD7                                                                       | Putative uncharacterized protein                                                                             | Escherichia coli (strain 55989 / EAEC)         |
| 60762  | 4293178 | 4292957 TY-2482_chromosome | B7LHD8                                                                       | Putative uncharacterized protein                                                                             | Escherichia coli (strain 55989 / EAEC)         |
| 97331  | 4293713 | 4293216 TY-2482_chromosome | B7LHD9                                                                       | Putative uncharacterized protein                                                                             | Escherichia coli (strain 55989 / EAEC)         |
| 75547  | 4294410 | 4294925 TY-2482_chromosome | B7LHE1                                                                       | Putative uncharacterized protein                                                                             | Escherichia coli (strain 55989 / EAEC)         |
| 73752  | 4295138 | 4297276 TY-2482_chromosome | B7LHE2                                                                       | Putative uncharacterized protein                                                                             | Escherichia coli (strain 55989 / EAEC)         |
| 17606  | 4297355 | 4300568 TY-2482_chromosome | B3IHE6                                                                       | Protein RhsA                                                                                                 | Escherichia coli E110019                       |
| 77435  | 4301002 | 4301481 TY-2482_chromosome | B7LHE5                                                                       | Putative uncharacterized protein ydcD                                                                        | Escherichia coli (strain 55989 / EAEC)         |
| 110629 | 4301665 | 4302408 TY-2482_chromosome | B7LHE6                                                                       | Putative uncharacterized protein yncI                                                                        | Escherichia coli (strain 55989 / EAEC)         |
| 111491 | 4302969 | 4304027 TY-2482_chromosome | B7LHE8                                                                       | Putative transposase                                                                                         | Escherichia coli (strain 55989 / EAEC)         |
| 64821  | 4304842 | 4304075 TY-2482_chromosome | B7LHF0                                                                       | Putative C-N hydrolase family amidase                                                                        | Escherichia coli (strain 55989 / EAEC)         |
| 79011  | 4304996 | 4305466 TY-2482_chromosome | B7LHF1                                                                       | Inhibitor of vertebrate C-lysozyme                                                                           | Escherichia coli (strain 55989 / EAEC)         |
| 93374  | 4307956 | 4305515 TY-2482_chromosome | B7LHF2                                                                       | Acyl coenzyme A dehydrogenase (EC 1.3.99.3)                                                                  | Escherichia coli (strain 55989 / EAEC)         |
| 25515  | 4308034 | 4308771 TY-2482_chromosome | A1A7T5                                                                       | Phosphoheptose isomerase                                                                                     | Escherichia coli O1:K1 / APEC                  |
| 62800  | 4308980 | 4309744 TY-2482_chromosome | B7LHF4                                                                       | Putative glutamine amidotransferases class-II                                                                | Escherichia coli (strain 55989 / EAEC)         |
| 84619  | 4310458 | 4309721 TY-2482_chromosome | B7LHF5                                                                       | Putative uncharacterized protein yafK                                                                        | Escherichia coli (strain 55989 / EAEC)         |
| 59166  | 4310892 | 4310617 TY-2482_chromosome | B7LHF6                                                                       | Toxin of the YafQ-DinJ toxin-antitoxin system                                                                | Escherichia coli (strain 55989 / EAEC)         |
| 77436  | 4311155 | 4310898 TY-2482_chromosome | B7LHF7                                                                       | Antitoxin of YafQ-DinJ toxin-antitoxin system                                                                | Escherichia coli (strain 55989 / EAEC)         |
| 75906  | 4311341 | 4312111 TY-2482_chromosome | C8THQ7                                                                       | Predicted lipoprotein and C40 family peptidase                                                               | Escherichia coli O26:H11 (strain 11368 / EHEC) |
| 105527 | 4312527 | 4312174 TY-2482_chromosome | B7LHF9                                                                       | Putative uncharacterized protein                                                                             | Escherichia coli (strain 55989 / EAEC)         |
| 81053  | 4312819 | 4312523 TY-2482_chromosome | B7LHG0                                                                       | Putative uncharacterized protein                                                                             | Escherichia coli (strain 55989 / EAEC)         |
| 95560  | 4314642 | 4312906 TY-2482_chromosome | B7LHG1                                                                       | Flagellar system protein                                                                                     | Escherichia coli (strain 55989 / EAEC)         |
| 99033  | 4315443 | 4316495 TY-2482_chromosome | B7LHG3                                                                       | DNA polymerase IV (Pol IV) (EC 2.7.7.7)                                                                      | Escherichia coli (strain 55989 / EAEC)         |
| 106963 | 4316495 | 4316944 TY-2482_chromosome | C8UI55                                                                       | Predicted acyltransferase                                                                                    | Escherichia coli O111:H- (strain 11128 / EHEC) |
| 101643 | 4317166 | 4318329 TY-2482_chromosome | B7L3Y7                                                                       | Putative uncharacterized protein                                                                             | Escherichia coli (strain 55989 / EAEC)         |
| 25847  | 4318245 | 4318940 TY-2482_chromosome | A1A7U7                                                                       | Peptide chain release factor-like protein                                                                    | Escherichia coli O1:K1 / APEC                  |
| 88400  | 4320457 | 4319003 TY-2482_chromosome | B7L3Y9                                                                       | Aminoacyl-histidine dipeptidase (Peptidase D) (EC 3.4.13.3)                                                  | Escherichia coli (strain 55989 / EAEC)         |
| 34607  | 4320718 | 4321173 TY-2482_chromosome | B7L3Z0                                                                       | Xanthine phosphoribosyltransferase (EC 2.4.2.22) (Xanthine-guanine phosphoribosyltransferase) (XGPR)         | Escherichia coli (strain 55989 / EAEC)         |
| 31024  | 4321268 | 4322509 TY-2482_chromosome | B7L3Z1                                                                       | Esterase frsA (EC 3.1.-.-)                                                                                   | Escherichia coli (strain 55989 / EAEC)         |
| 30410  | 4322570 | 4322968 TY-2482_chromosome | B7L3Z2                                                                       | Sigma factor-binding protein crI                                                                             | Escherichia coli (strain 55989 / EAEC)         |
| 87433  | 4324065 | 4323013 TY-2482_chromosome | B7L3Z3                                                                       | Outer membrane phosphoprotein E                                                                              | Escherichia coli (strain 55989 / EAEC)         |
| 33077  | 4324353 | 4325453 TY-2482_chromosome | B7L3Z4                                                                       | Glutamate 5-kinase (EC 2.7.2.11) (Gamma-glutamyl kinase) (GK)                                                | Escherichia coli (strain 55989 / EAEC)         |
| 33073  | 4325468 | 4326718 TY-2482_chromosome | B7L3Z5                                                                       | Gamma-glutamyl phosphate reductase (GPR) (EC 1.2.1.41) (Glutamate-5-semialdehyde dehydrogenase) (Glutamyl-ga | Escherichia coli (strain 55989 / EAEC)         |
| r468   | 4326836 | 4326911 TY-2482_chromosome | ref NC_010473 :236199-236274 Thr tRNA [ gene=thrW ] [ locus_tag=ECDH10B_0226 |                                                                                                              |                                                |
| 13276  | 4327284 | 4326973 TY-2482_chromosome | D6J782                                                                       | Predicted protein                                                                                            | Escherichia coli B354                          |
| 23364  | 4328793 | 4328239 TY-2482_chromosome | B3HAL5                                                                       | Transposon Tn21 resolvase                                                                                    | Escherichia coli B7A                           |
| 17111  | 4330792 | 4331457 TY-2482_chromosome | E2WYY1                                                                       | Putative uncharacterized protein                                                                             | Escherichia coli 1827-70                       |
| 22803  | 4331470 | 4331736 TY-2482_chromosome | E9V554                                                                       | Putative uncharacterized protein                                                                             | Escherichia coli H252                          |
| 21579  | 4331837 | 4332217 TY-2482_chromosome | D7ZST0                                                                       | Conserved domain protein                                                                                     | Escherichia coli MS 187-1                      |
| 14317  | 4332236 | 4332478 TY-2482_chromosome | B3HAK9                                                                       | ABC transporter ATPase component                                                                             | Escherichia coli B7A                           |
| 12484  | 4332481 | 4332777 TY-2482_chromosome | B3HAK8                                                                       | Putative uncharacterized protein                                                                             | Escherichia coli B7A                           |
| 15659  | 4333973 | 4334353 TY-2482_chromosome | B3HAK3                                                                       | Putative uncharacterized protein                                                                             | Escherichia coli B7A                           |
| 18561  | 4334371 | 4335399 TY-2482_chromosome | B3HAK2                                                                       | Putative uncharacterized protein                                                                             | Escherichia coli B7A                           |
| 90110  | 4335786 | 4337624 TY-2482_chromosome | C8THX6                                                                       | Conserved predicted protein                                                                                  | Escherichia coli O26:H11 (strain 11368 / EHEC) |
| 22613  | 4337675 | 4338349 TY-2482_chromosome | E9TCE4                                                                       | Putative uncharacterized protein                                                                             | Escherichia coli MS 117-3                      |
| 115462 | 4339710 | 4338436 TY-2482_chromosome | C8THX8                                                                       | Putative integrase                                                                                           | Escherichia coli O26:H11 (strain 11368 / EHEC) |
| 102843 | 4340038 | 4341249 TY-2482_chromosome | B7L3Z6                                                                       | Putative prophage CPS-53 integrase                                                                           | Escherichia coli (strain 55989 / EAEC)         |
| 29409  | 4341375 | 4342175 TY-2482_chromosome | B7L3Z7                                                                       | Putative uncharacterized protein                                                                             | Escherichia coli (strain 55989 / EAEC)         |
| 27689  | 4342373 | 4342567 TY-2482_chromosome | B7L3Z8                                                                       | Phage transcriptional regulator, AlpA                                                                        | Escherichia coli (strain 55989 / EAEC)         |
| 26580  | 4342649 | 4343446 TY-2482_chromosome | B7L3Z9                                                                       | AntA/AntB antirepressor                                                                                      | Escherichia coli (strain 55989 / EAEC)         |
| 28044  | 4343442 | 4345025 TY-2482_chromosome | B7L400                                                                       | Putative uncharacterized protein                                                                             | Escherichia coli (strain 55989 / EAEC)         |
| 24286  | 4345021 | 4345383 TY-2482_chromosome | B7L402                                                                       | Putative uncharacterized protein                                                                             | Escherichia coli (strain 55989 / EAEC)         |
| 24586  | 4345379 | 4345576 TY-2482_chromosome | B7L403                                                                       | Putative uncharacterized protein                                                                             | Escherichia coli (strain 55989 / EAEC)         |
| 26614  | 4345584 | 4345871 TY-2482_chromosome | B7L404                                                                       | Putative uncharacterized protein                                                                             | Escherichia coli (strain 55989 / EAEC)         |
| 29566  | 4345871 | 4348000 TY-2482_chromosome | B7L405                                                                       | Putative uncharacterized protein                                                                             | Escherichia coli (strain 55989 / EAEC)         |
| 25604  | 4348462 | 4349016 TY-2482_chromosome | B7L406                                                                       | Activator of ProP osmoprotectant transporter                                                                 | Escherichia coli (strain 55989 / EAEC)         |

|        |         |                            |        |                                                                                                           |                                                 |
|--------|---------|----------------------------|--------|-----------------------------------------------------------------------------------------------------------|-------------------------------------------------|
| 25783  | 4349016 | 4349300 TY-2482_chromosome | B7L407 | Protein perC (Protein bfpW)                                                                               | Escherichia coli (strain 55989 / EAEC)          |
| 25901  | 4349438 | 4350577 TY-2482_chromosome | B7L408 | Putative uncharacterized protein                                                                          | Escherichia coli (strain 55989 / EAEC)          |
| 24755  | 4350645 | 4350965 TY-2482_chromosome | B7L409 | Putative uncharacterized protein                                                                          | Escherichia coli (strain 55989 / EAEC)          |
| 29590  | 4351411 | 4351680 TY-2482_chromosome | B7L410 | Putative uncharacterized protein                                                                          | Escherichia coli (strain 55989 / EAEC)          |
| 91966  | 4351765 | 4352307 TY-2482_chromosome | B7L411 | Putative uncharacterized protein                                                                          | Escherichia coli (strain 55989 / EAEC)          |
| 27690  | 4352914 | 4353906 TY-2482_chromosome | B7L412 | Putative uncharacterized protein                                                                          | Escherichia coli (strain 55989 / EAEC)          |
| 24353  | 4353902 | 4354879 TY-2482_chromosome | B7L413 | Putative uncharacterized protein                                                                          | Escherichia coli (strain 55989 / EAEC)          |
| 23740  | 4355264 | 4355764 TY-2482_chromosome | P7L299 | Putative uncharacterized protein                                                                          | Escherichia coli                                |
| 62821  | 4356687 | 4355734 TY-2482_chromosome | B7L415 | Putative uncharacterized protein yagQ                                                                     | Escherichia coli (strain 55989 / EAEC)          |
| 102936 | 4358895 | 4356700 TY-2482_chromosome | B7L416 | Putative oxidoreductase with molybdenum-binding domain                                                    | Escherichia coli (strain 55989 / EAEC)          |
| 60499  | 4359848 | 4358895 TY-2482_chromosome | B7L417 | Putative oxidoreductase with FAD-binding domain                                                           | Escherichia coli (strain 55989 / EAEC)          |
| 72954  | 4360534 | 4359848 TY-2482_chromosome | B7L418 | Putative oxidoreductase, 2Fe-2S subunit                                                                   | Escherichia coli (strain 55989 / EAEC)          |
| 90373  | 4360952 | 4361563 TY-2482_chromosome | B7L419 | Putative uncharacterized protein yagU                                                                     | Escherichia coli (strain 55989 / EAEC)          |
| 16686  | 4361571 | 4361816 TY-2482_chromosome | B3XF80 | Putative uncharacterized protein                                                                          | Escherichia coli 101-1                          |
| 97566  | 4362143 | 4361817 TY-2482_chromosome | C8U1Y0 | Predicted ferredoxin                                                                                      | Escherichia coli O103:H2 (strain 12009 / EHEC)  |
| 115824 | 4363166 | 4362459 TY-2482_chromosome | B7L420 | Putative uncharacterized protein yagV                                                                     | Escherichia coli (strain 55989 / EAEC)          |
| 114104 | 4364778 | 4363138 TY-2482_chromosome | B7L421 | Putative surface or exported protein                                                                      | Escherichia coli (strain 55989 / EAEC)          |
| 90196  | 4367293 | 4364771 TY-2482_chromosome | B7L422 | Putative uncharacterized protein yagX                                                                     | Escherichia coli (strain 55989 / EAEC)          |
| 32111  | 4367987 | 4367322 TY-2482_chromosome | B7L423 | Uncharacterized protein matC                                                                              | Escherichia coli (strain 55989 / EAEC)          |
| 104630 | 4368632 | 4368048 TY-2482_chromosome | B7L424 | E. coli common pilus (ECP)                                                                                | Escherichia coli (strain 55989 / EAEC)          |
| 32108  | 4369297 | 4368710 TY-2482_chromosome | B7L425 | Probable HTH-type transcriptional regulator matA homolog                                                  | Escherichia coli (strain 55989 / EAEC)          |
| 62822  | 4370072 | 4370296 TY-2482_chromosome | B7L426 | Putative uncharacterized protein ykgl                                                                     | Escherichia coli (strain 55989 / EAEC)          |
| 33526  | 4370737 | 4370477 TY-2482_chromosome | B7L427 | 50S ribosomal protein L31 type B                                                                          | Escherichia coli (strain 55989 / EAEC)          |
| 85927  | 4371023 | 4370794 TY-2482_chromosome | D3GT81 | Putative uncharacterized protein                                                                          | Escherichia coli O44:H18 (strain 042 / EAEC)    |
| 21503  | 4372312 | 4374381 TY-2482_chromosome | D6JDQ4 | Predicted protein (Fragment)                                                                              | Escherichia coli B354                           |
| 65133  | 4377582 | 4376695 TY-2482_chromosome | B7L429 | Putative transcriptional regulator ykgA                                                                   | Escherichia coli (strain 55989 / EAEC)          |
| 8547   | 4378715 | 4378981 TY-2482_chromosome | C3TNJ2 | Putative uncharacterized protein                                                                          | Escherichia coli                                |
| 102939 | 4378732 | 4378142 TY-2482_chromosome | B7L430 | Putative uncharacterized protein ykgB                                                                     | Escherichia coli (strain 55989 / EAEC)          |
| 83551  | 4380414 | 4379092 TY-2482_chromosome | B7L432 | Putative pyridine nucleotide-disulfide oxidoreductase                                                     | Escherichia coli (strain 55989 / EAEC)          |
| 87363  | 4380640 | 4381491 TY-2482_chromosome | B7L433 | Putative AraC-type DNA-binding transcriptional regulator                                                  | Escherichia coli (strain 55989 / EAEC)          |
| 86867  | 4382021 | 4382737 TY-2482_chromosome | B7L434 | Putative hydroxyacid oxidoreductase (Fe-S centre)                                                         | Escherichia coli (strain 55989 / EAEC)          |
| 94276  | 4382751 | 4384175 TY-2482_chromosome | B7L435 | Putative oxidoreductase subunit with NAD(P)-binding domain and ferridoxin-like domain                     | Escherichia coli (strain 55989 / EAEC)          |
| 72426  | 4384171 | 4384863 TY-2482_chromosome | B7L436 | Putative uncharacterized protein ykgG                                                                     | Escherichia coli (strain 55989 / EAEC)          |
| 86999  | 4385033 | 4384824 TY-2482_chromosome | C8TI04 | Conserved predicted protein                                                                               | Escherichia coli O26:H11 (strain 11368 / EHEC)  |
| 77484  | 4385137 | 4384943 TY-2482_chromosome | B7L437 | Putative uncharacterized protein                                                                          | Escherichia coli (strain 55989 / EAEC)          |
| 88461  | 4385777 | 4385115 TY-2482_chromosome | B7L438 | Putative uncharacterized protein ykgH                                                                     | Escherichia coli (strain 55989 / EAEC)          |
| 30079  | 4387660 | 4385993 TY-2482_chromosome | B7L439 | Choline dehydrogenase (CDH) (CHD) (EC 1.1.99.1)                                                           | Escherichia coli (strain 55989 / EAEC)          |
| 30082  | 4389146 | 4387677 TY-2482_chromosome | B7L441 | Betaine aldehyde dehydrogenase (BADH) (EC 1.2.1.8)                                                        | Escherichia coli (strain 55989 / EAEC)          |
| 29480  | 4389664 | 4389876 TY-2482_chromosome | Q0TKV8 | Putative uncharacterized protein                                                                          | Escherichia coli O6:K15:H31 (strain 536 / UPEC) |
| 30112  | 4389747 | 4389163 TY-2482_chromosome | B7L442 | HTH-type transcriptional regulator BetI                                                                   | Escherichia coli (strain 55989 / EAEC)          |
| 91967  | 4389876 | 4391906 TY-2482_chromosome | B7L443 | Choline transporter of high affinity                                                                      | Escherichia coli (strain 55989 / EAEC)          |
| 110489 | 4392416 | 4396462 TY-2482_chromosome | B7L444 | Putative beta-barrel outer membrane protein, similar to AidA-I adhesin-like protein                       | Escherichia coli (strain 55989 / EAEC)          |
| 67706  | 4396607 | 4397692 TY-2482_chromosome | B7L445 | Cyclic di-GMP phosphodiesterase                                                                           | Escherichia coli (strain 55989 / EAEC)          |
| 98233  | 4398669 | 4397740 TY-2482_chromosome | B7L446 | Putative DNA-binding transcriptional regulator                                                            | Escherichia coli (strain 55989 / EAEC)          |
| 67744  | 4399258 | 4398764 TY-2482_chromosome | B7L447 | Putative uncharacterized protein yahC                                                                     | Escherichia coli (strain 55989 / EAEC)          |
| 104478 | 4399335 | 4399565 TY-2482_chromosome | D3GTA7 | Putative uncharacterized protein                                                                          | Escherichia coli O44:H18 (strain 042 / EAEC)    |
| 70066  | 4399516 | 4400118 TY-2482_chromosome | B7L448 | Putative uncharacterized protein yahD                                                                     | Escherichia coli (strain 55989 / EAEC)          |
| 101274 | 4400161 | 4401021 TY-2482_chromosome | B7L449 | Putative uncharacterized protein yahE                                                                     | Escherichia coli (strain 55989 / EAEC)          |
| 97417  | 4401014 | 4402558 TY-2482_chromosome | B7L450 | Putative enzyme with acyl-CoA domain                                                                      | Escherichia coli (strain 55989 / EAEC)          |
| 114208 | 4402561 | 4403976 TY-2482_chromosome | B7L451 | Putative uncharacterized protein yahG                                                                     | Escherichia coli (strain 55989 / EAEC)          |
| 70067  | 4404122 | 4405069 TY-2482_chromosome | B7L452 | Putative carbamate kinase (EC 2.7.2.-)                                                                    | Escherichia coli (strain 55989 / EAEC)          |
| 73768  | 4405082 | 4406461 TY-2482_chromosome | B7L453 | Putative deaminase/amidohydrolase with metallo-dependent hydrolase domain                                 | Escherichia coli (strain 55989 / EAEC)          |
| 114105 | 4406733 | 4407170 TY-2482_chromosome | B7L454 | Putative uncharacterized protein                                                                          | Escherichia coli (strain 55989 / EAEC)          |
| 72278  | 4407424 | 4408407 TY-2482_chromosome | B7L455 | Putative periplasmic binding protein, substrate ribose (Sugar-binding protein), ABC-type transport system | Escherichia coli (strain 55989 / EAEC)          |
| 112322 | 4408444 | 4409940 TY-2482_chromosome | B7L4X8 | Putative ATP-binding component of ABC sugar transport system (EC 3.6.3.17)                                | Escherichia coli (strain 55989 / EAEC)          |
| 99126  | 4409936 | 4410904 TY-2482_chromosome | B7L4X9 | Putative permease component of sugar ABC transport system                                                 | Escherichia coli (strain 55989 / EAEC)          |
| 101840 | 4410874 | 4411857 TY-2482_chromosome | B7L4Y0 | Putative permease component of sugar ABC transport system                                                 | Escherichia coli (strain 55989 / EAEC)          |
| 88479  | 4411947 | 4412993 TY-2482_chromosome | B7L4Y1 | Putative oxidoreductase, Zn-dependent and NAD(P)-binding                                                  | Escherichia coli (strain 55989 / EAEC)          |
| 114134 | 4413239 | 4414051 TY-2482_chromosome | B7L4Y2 | Putative uncharacterized protein yahL                                                                     | Escherichia coli (strain 55989 / EAEC)          |
| 82916  | 4414466 | 4414708 TY-2482_chromosome | B7L4Y3 | Putative uncharacterized protein yahM                                                                     | Escherichia coli (strain 55989 / EAEC)          |
| 62840  | 4415399 | 4414731 TY-2482_chromosome | B7L4Y4 | Neutral amino-acid efflux system                                                                          | Escherichia coli (strain 55989 / EAEC)          |
| 91764  | 4415546 | 4415818 TY-2482_chromosome | B7L4Y5 | Putative uncharacterized protein yahO                                                                     | Escherichia coli (strain 55989 / EAEC)          |
| 70020  | 4417508 | 4415925 TY-2482_chromosome | B7L4Y6 | DNA-binding transcriptional activator                                                                     | Escherichia coli (strain 55989 / EAEC)          |
| 88414  | 4417746 | 4418633 TY-2482_chromosome | B7L4Y7 | 2-methylisocitrate lyase (EC 4.1.3.30)                                                                    | Escherichia coli (strain 55989 / EAEC)          |

|        |         |                            |        |                                                                                                                    |                                                  |
|--------|---------|----------------------------|--------|--------------------------------------------------------------------------------------------------------------------|--------------------------------------------------|
| 114065 | 4418681 | 4419847 TY-2482_chromosome | B7L4Y8 | 2-methylcitrate synthase (EC 2.3.3.1)                                                                              | Escherichia coli (strain 55989 / EAEC)           |
| 84592  | 4419884 | 4421332 TY-2482_chromosome | B7L4Y9 | 2-methylcitrate dehydratase (EC 4.2.1.79)                                                                          | Escherichia coli (strain 55989 / EAEC)           |
| 98231  | 4421375 | 4423258 TY-2482_chromosome | B7L4Z0 | Propionyl-CoA synthetase (EC 6.2.1.17)                                                                             | Escherichia coli (strain 55989 / EAEC)           |
| 106523 | 4423687 | 4424943 TY-2482_chromosome | B7L4Z2 | Cytosine transporter                                                                                               | Escherichia coli (strain 55989 / EAEC)           |
| 88415  | 4424936 | 4426216 TY-2482_chromosome | B7L4Z3 | Cytosine deaminase (EC 3.5.4.1)                                                                                    | Escherichia coli (strain 55989 / EAEC)           |
| 76826  | 4427158 | 4426262 TY-2482_chromosome | B7L4Z4 | DNA-binding transcriptional dual regulator                                                                         | Escherichia coli (strain 55989 / EAEC)           |
| 97121  | 4427268 | 4427924 TY-2482_chromosome | B7L4Z5 | Carbonic anhydrase (EC 4.2.1.1)                                                                                    | Escherichia coli (strain 55989 / EAEC)           |
| 30457  | 4427958 | 4428425 TY-2482_chromosome | B7L4Z6 | Cyanate hydratase (Cyanase) (EC 4.2.1.104) (Cyanate hydrolase) (Cyanate lyase)                                     | Escherichia coli (strain 55989 / EAEC)           |
| 90957  | 4428461 | 4429612 TY-2482_chromosome | B7L4Z7 | Putative cyanate transporter                                                                                       | Escherichia coli (strain 55989 / EAEC)           |
| 82473  | 4430380 | 4429721 TY-2482_chromosome | D3GTD3 | Galactoside O-acetyltransferase (EC 2.3.1.18)                                                                      | Escherichia coli O44:H18 (strain 042 / EAEC)     |
| 106435 | 4431648 | 4430398 TY-2482_chromosome | B7L4Z9 | Lactose/galactose transporter                                                                                      | Escherichia coli (strain 55989 / EAEC)           |
| 73727  | 4434774 | 4431703 TY-2482_chromosome | B7L500 | Beta-galactosidase (Beta-gal) (EC 3.2.1.23) (Lactase)                                                              | Escherichia coli (strain 55989 / EAEC)           |
| 102861 | 4435979 | 4434900 TY-2482_chromosome | B7L501 | DNA-binding transcriptional repressor                                                                              | Escherichia coli (strain 55989 / EAEC)           |
| 65822  | 4437003 | 4436059 TY-2482_chromosome | B7L502 | DNA-binding transcriptional activator, 3HPP-binding                                                                | Escherichia coli (strain 55989 / EAEC)           |
| 32383  | 4437080 | 4438741 TY-2482_chromosome | B7L503 | 3-(3-hydroxy-phenyl)propionate/3-hydroxycinnamic acid hydroxylase (3-HCl hydroxylase) (3-HPP hydroxylase) (EC 1.1) | Escherichia coli (strain 55989 / EAEC)           |
| 32385  | 4438746 | 4439687 TY-2482_chromosome | B7L504 | 2,3-dihydroxyphenylpropionate/2,3-dihydroxycinnamic acid 1,2-dioxygenase (EC 1.13.11.16)                           | Escherichia coli (strain 55989 / EAEC)           |
| 32387  | 4439693 | 4440571 TY-2482_chromosome | B7L505 | 2-hydroxy-6-oxononadienedioate/2-hydroxy-6-oxononatrienedioate hydrolase (EC 3.7.1.n1) (2-hydroxy-6-ketono-        | Escherichia coli (strain 55989 / EAEC)           |
| 32388  | 4440584 | 4441390 TY-2482_chromosome | B7L506 | 2-keto-4-pentenoate hydratase (EC 4.2.1.80) (2-hydroxypentadienoic acid hydratase)                                 | Escherichia coli (strain 55989 / EAEC)           |
| 29684  | 4441390 | 4442337 TY-2482_chromosome | B7L507 | Acetaldehyde dehydrogenase (EC 1.2.1.10) (Acetaldehyde dehydrogenase [acetylating])                                | Escherichia coli (strain 55989 / EAEC)           |
| 31522  | 4442337 | 4443347 TY-2482_chromosome | B7L508 | 4-hydroxy-2-oxovalerate aldolase (HOA) (EC 4.1.3.39) (4-hydroxy-2-keto-pentanoic acid aldolase) (4-hydroxy-2-oxo-  | Escherichia coli (strain 55989 / EAEC)           |
| 91267  | 4443526 | 4444734 TY-2482_chromosome | B7L509 | Hydroxy-aromatic acid transporter                                                                                  | Escherichia coli (strain 55989 / EAEC)           |
| 64243  | 4444839 | 4445375 TY-2482_chromosome | B7L510 | Nucleoprotein/polynucleotide-associated enzyme                                                                     | Escherichia coli (strain 55989 / EAEC)           |
| 88416  | 4446438 | 4445608 TY-2482_chromosome | B7L512 | S-formylglutathione hydrolase                                                                                      | Escherichia coli (strain 55989 / EAEC)           |
| 94226  | 4447640 | 4446534 TY-2482_chromosome | B7L513 | Alcohol dehydrogenase class III/glutathione-dependent formaldehyde dehydrogenase (EC 1.1.1.1) (EC 1.1.1.284)       | Escherichia coli (strain 55989 / EAEC)           |
| 27137  | 4447720 | 4448019 TY-2482_chromosome | Q1RF15 | Putative uncharacterized protein                                                                                   | Escherichia coli (strain UT189 / UPEC)           |
| 106437 | 4448909 | 4448139 TY-2482_chromosome | B7L515 | Putative uncharacterized protein yaiO                                                                              | Escherichia coli (strain 55989 / EAEC)           |
| 77430  | 4450666 | 4449473 TY-2482_chromosome | B7L517 | Putative membrane-associated glycosyltransferase                                                                   | Escherichia coli (strain 55989 / EAEC)           |
| 73729  | 4451347 | 4450679 TY-2482_chromosome | B7L518 | Putative uncharacterized protein yaiS                                                                              | Escherichia coli (strain 55989 / EAEC)           |
| 27730  | 4451812 | 4451600 TY-2482_chromosome | E3PET9 | Putative uncharacterized protein                                                                                   | Escherichia coli O78:H11 (strain H10407 / ETEC)  |
| 110154 | 4451963 | 4452922 TY-2482_chromosome | B7L519 | Taurine transporter subunit ; periplasmic-binding component of ABC superfamily                                     | Escherichia coli (strain 55989 / EAEC)           |
| 62780  | 4452938 | 4453702 TY-2482_chromosome | B7L520 | Taurine transporter subunit ; ATP-binding component of ABC superfamily                                             | Escherichia coli (strain 55989 / EAEC)           |
| 29264  | 4454257 | 4454526 TY-2482_chromosome | B7NJ4  | Taurine dioxygenase, 2-oxoglutarate-dependent (EC 1.14.11.17)                                                      | Escherichia coli O7:K1 (strain IA139 / ExPEC)    |
| 29265  | 4454592 | 4455374 TY-2482_chromosome | B7NJ4  | Taurine dioxygenase, 2-oxoglutarate-dependent (EC 1.14.11.17)                                                      | Escherichia coli O7:K1 (strain IA139 / ExPEC)    |
| 75695  | 4456457 | 4455486 TY-2482_chromosome | B7L523 | Delta-aminolevulinic acid dehydratase (EC 4.2.1.24)                                                                | Escherichia coli (strain 55989 / EAEC)           |
| 27642  | 4456896 | 4456630 TY-2482_chromosome | B6HZH1 | Putative uncharacterized protein                                                                                   | Escherichia coli (strain SE11)                   |
| 76743  | 4456981 | 4459866 TY-2482_chromosome | B7L524 | Putative flagellin structural protein; putative exported protein                                                   | Escherichia coli (strain 55989 / EAEC)           |
| 88418  | 4459912 | 4460577 TY-2482_chromosome | B7L525 | Putative uncharacterized protein yaiV                                                                              | Escherichia coli (strain 55989 / EAEC)           |
| 107983 | 4461738 | 4460584 TY-2482_chromosome | B7L526 | Beta-lactamase/D-alanine carboxypeptidase (EC 3.4.17.8) (EC 3.5.2.6)                                               | Escherichia coli (strain 55989 / EAEC)           |
| 102910 | 4461876 | 4462067 TY-2482_chromosome | B7L527 | Putative uncharacterized protein                                                                                   | Escherichia coli (strain 55989 / EAEC)           |
| 88367  | 4462090 | 4463307 TY-2482_chromosome | B7L528 | Transporter involved in cell envelope modification                                                                 | Escherichia coli (strain 55989 / EAEC)           |
| 101587 | 4463323 | 4464414 TY-2482_chromosome | B7L529 | Putative lipoprotein                                                                                               | Escherichia coli (strain 55989 / EAEC)           |
| 72275  | 4464784 | 4464479 TY-2482_chromosome | B7L530 | Putative uncharacterized protein yaiY                                                                              | Escherichia coli (strain 55989 / EAEC)           |
| 95602  | 4464912 | 4465253 TY-2482_chromosome | B7L531 | Putative uncharacterized protein yaiZ                                                                              | Escherichia coli (strain 55989 / EAEC)           |
| 115187 | 4466374 | 4465283 TY-2482_chromosome | B7L532 | D-alanine-D-alanine ligase 2 (EC 6.3.2.4) (D-Ala-D-Ala ligase 2) (D-alanylalanine synthetase 2)                    | Escherichia coli (strain 55989 / EAEC)           |
| 29090  | 4466452 | 4466652 TY-2482_chromosome | B7L533 | Putative uncharacterized protein                                                                                   | Escherichia coli (strain 55989 / EAEC)           |
| 31674  | 4466837 | 4467094 TY-2482_chromosome | B7L534 | Anti-adaptor protein iraP                                                                                          | Escherichia coli (strain 55989 / EAEC)           |
| 10195  | 4466937 | 4466689 TY-2482_chromosome | P71314 | Putative uncharacterized protein                                                                                   | Escherichia coli                                 |
| 115538 | 4467198 | 4468610 TY-2482_chromosome | C8U269 | Bacterial alkaline phosphatase PhoA                                                                                | Escherichia coli O103:H2 (strain 12009 / EHEC)   |
| 102911 | 4468732 | 4469049 TY-2482_chromosome | B7L539 | Phosphate starvation-inducible protein                                                                             | Escherichia coli (strain 55989 / EAEC)           |
| 91919  | 4469154 | 4470266 TY-2482_chromosome | B7L540 | Putative diguanylate cyclase                                                                                       | Escherichia coli (strain 55989 / EAEC)           |
| 77431  | 4471095 | 4470289 TY-2482_chromosome | B7L541 | Pyrroline-5-carboxylate reductase (EC 1.5.1.2)                                                                     | Escherichia coli (strain 55989 / EAEC)           |
| 50325  | 4471095 | 4471670 TY-2482_chromosome | D8CGU2 | Toxin-antitoxin system, toxin component, PIN family                                                                | Escherichia coli MS 185-1                        |
| 29920  | 4471856 | 4472377 TY-2482_chromosome | B7L543 | Shikimate kinase 2 (SK 2) (EC 2.7.1.71)                                                                            | Escherichia coli (strain 55989 / EAEC)           |
| 27765  | 4472699 | 4472373 TY-2482_chromosome | Q1RFF5 | Putative uncharacterized protein                                                                                   | Escherichia coli (strain UT189 / UPEC)           |
| 66277  | 4472879 | 4473553 TY-2482_chromosome | B7L545 | Putative uncharacterized protein aroM                                                                              | Escherichia coli (strain 55989 / EAEC)           |
| 34740  | 4473628 | 4473909 TY-2482_chromosome | B7L546 | UPF0345 protein yaiE                                                                                               | Escherichia coli (strain 55989 / EAEC)           |
| 103022 | 4474092 | 4474532 TY-2482_chromosome | C6UZ26 | Predicted protein                                                                                                  | Escherichia coli O157:H7 (strain TW14359 / EHEC) |
| 33291  | 4475524 | 4474616 TY-2482_chromosome | B7L548 | Recombination-associated protein rdcC                                                                              | Escherichia coli (strain 55989 / EAEC)           |
| 81037  | 4475649 | 4476554 TY-2482_chromosome | B7L549 | Manno(Fructo)kinase (EC 2.7.1.4)                                                                                   | Escherichia coli (strain 55989 / EAEC)           |
| 114067 | 4477884 | 4476703 TY-2482_chromosome | B7L550 | Putative major facilitator class transporter                                                                       | Escherichia coli (strain 55989 / EAEC)           |
| 102234 | 4481153 | 4478013 TY-2482_chromosome | B7L551 | Exonuclease, dsDNA, ATP-dependent                                                                                  | Escherichia coli (strain 55989 / EAEC)           |
| 79770  | 4482352 | 4481153 TY-2482_chromosome | B7L552 | Exonuclease, dsDNA, ATP-dependent                                                                                  | Escherichia coli (strain 55989 / EAEC)           |
| 91920  | 4482542 | 4483228 TY-2482_chromosome | B7L553 | DNA-binding response regulator in two-component regulatory system with PhoR (Or CreC)                              | Escherichia coli (strain 55989 / EAEC)           |
| 87881  | 4483289 | 4484581 TY-2482_chromosome | B7L688 | Sensory histidine kinase in two-component regulatory system with PhoB (EC 2.7.3.-)                                 | Escherichia coli (strain 55989 / EAEC)           |

|        |         |                            |                                                                     |                                                                                                                                         |                                                 |
|--------|---------|----------------------------|---------------------------------------------------------------------|-----------------------------------------------------------------------------------------------------------------------------------------|-------------------------------------------------|
| 80272  | 4484991 | 4486307 TY-2482_chromosome | B7L634                                                              | Branched chain amino acid transporter (LIV-II)                                                                                          | Escherichia coli (strain 55989 / EAEC)          |
| 96941  | 4486386 | 4487756 TY-2482_chromosome | B7L635                                                              | Proline transporter                                                                                                                     | Escherichia coli (strain 55989 / EAEC)          |
| 95444  | 4487915 | 4489729 TY-2482_chromosome | B7L636                                                              | Maltodextrin glucosidase (EC 3.2.1.20)                                                                                                  | Escherichia coli (strain 55989 / EAEC)          |
| 29694  | 4490318 | 4489740 TY-2482_chromosome | B7L637                                                              | Acyl carrier protein phosphodiesterase (ACP phosphodiesterase) (EC 3.1.4.14)                                                            | Escherichia coli (strain 55989 / EAEC)          |
| 33229  | 4490411 | 4491478 TY-2482_chromosome | B7L638                                                              | S-adenosylmethionine:tRNA ribosyltransferase-isomerase (EC 5.-.-.) (Queuosine biosynthesis protein queA)                                | Escherichia coli (strain 55989 / EAEC)          |
| 34240  | 4491537 | 4492661 TY-2482_chromosome | B7L639                                                              | Queuine tRNA-ribosyltransferase (EC 2.4.2.29) (Guanine insertion enzyme) (tRNA-guanine transglycosylase)                                | Escherichia coli (strain 55989 / EAEC)          |
| 109594 | 4492687 | 4493016 TY-2482_chromosome | B7L640                                                              | SecYEG protein translocase auxillary subunit                                                                                            | Escherichia coli (strain 55989 / EAEC)          |
| 110576 | 4493047 | 4494891 TY-2482_chromosome | B7L641                                                              | SecYEG protein translocase auxillary subunit                                                                                            | Escherichia coli (strain 55989 / EAEC)          |
| 91146  | 4494905 | 4495873 TY-2482_chromosome | B7L642                                                              | SecYEG protein translocase auxillary subunit                                                                                            | Escherichia coli (strain 55989 / EAEC)          |
| 82639  | 4496005 | 4496349 TY-2482_chromosome | B7L643                                                              | Putative uncharacterized protein yajD                                                                                                   | Escherichia coli (strain 55989 / EAEC)          |
| 101060 | 4497413 | 4496532 TY-2482_chromosome | B7L644                                                              | Nucleoside channel, receptor of phage T6 and colicin K                                                                                  | Escherichia coli (strain 55989 / EAEC)          |
| 67591  | 4498251 | 4497715 TY-2482_chromosome | C8TJ02                                                              | Predicted lipoprotein                                                                                                                   | Escherichia coli O26:H11 (strain 11368 / EHEC)  |
| 32714  | 4498402 | 4498848 TY-2482_chromosome | B7L647                                                              | Transcriptional repressor NrdR                                                                                                          | Escherichia coli (strain 55989 / EAEC)          |
| 76401  | 4498855 | 4499955 TY-2482_chromosome | B7L648                                                              | Fused diaminohydroxyphosphoribosylaminopyrimidine deaminase; 5-amino-6-(5-phosphoribosylamino) uracil reductase                         | Escherichia coli (strain 55989 / EAEC)          |
| 27272  | 4499951 | 4500514 TY-2482_chromosome | A1A885                                                              | 6,7-dimethyl-8-ribityllumazine synthase (DMRL synthase) (Lumazine synthase) (EC 2.5.1.9) (Riboflavin synthase beta subunit)             | Escherichia coli O1:K1 / APEC                   |
| 62661  | 4501034 | 4502008 TY-2482_chromosome | B7L651                                                              | Thiamin-monophosphate kinase (EC 2.7.4.16)                                                                                              | Escherichia coli (strain 55989 / EAEC)          |
| 24208  | 4501040 | 4500510 TY-2482_chromosome | A1A886                                                              | Putative uncharacterized protein                                                                                                        | Escherichia coli O1:K1 / APEC                   |
| 86621  | 4501989 | 4502504 TY-2482_chromosome | B7L652                                                              | Phosphatidylglycerophosphatase A (EC 3.1.3.27)                                                                                          | Escherichia coli (strain 55989 / EAEC)          |
| 84455  | 4503535 | 4502564 TY-2482_chromosome | B7L653                                                              | Aldoketo-oxidoreductase, NADP-binding                                                                                                   | Escherichia coli (strain 55989 / EAEC)          |
| 30704  | 4505452 | 4503593 TY-2482_chromosome | B7L654                                                              | 1-deoxy-D-xylulose-5-phosphate synthase (EC 2.2.1.7) (1-deoxyxylulose-5-phosphate synthase) (DXP synthase) (DXPS)                       | Escherichia coli (strain 55989 / EAEC)          |
| 100775 | 4506376 | 4505480 TY-2482_chromosome | B7L655                                                              | Geranyltransferase (EC 2.5.1.1) (EC 2.5.1.10)                                                                                           | Escherichia coli (strain 55989 / EAEC)          |
| 30824  | 4506618 | 4506379 TY-2482_chromosome | B7L656                                                              | Exodeoxyribonuclease 7 small subunit (EC 3.1.11.6) (Exodeoxyribonuclease VII small subunit) (Exonuclease VII small subunit)             | Escherichia coli (strain 55989 / EAEC)          |
| 34254  | 4506824 | 4508269 TY-2482_chromosome | B7L657                                                              | tRNA sulfurtransferase (EC 2.8.1.4) (Sulfur carrier protein ThiS sulfurtransferase) (Thiamine biosynthesis protein thiI)                | Escherichia coli (strain 55989 / EAEC)          |
| 76515  | 4508916 | 4508329 TY-2482_chromosome | B7L658                                                              | Putative uncharacterized protein yajL                                                                                                   | Escherichia coli (strain 55989 / EAEC)          |
| 69936  | 4509790 | 4508882 TY-2482_chromosome | B7L659                                                              | 2-dehydropanoate reductase, NADPH-specific (EC 1.1.1.169)                                                                               | Escherichia coli (strain 55989 / EAEC)          |
| 34747  | 4509958 | 4510446 TY-2482_chromosome | B7L660                                                              | UPF0234 protein yajQ                                                                                                                    | Escherichia coli (strain 55989 / EAEC)          |
| 106415 | 4511941 | 4510580 TY-2482_chromosome | B7L661                                                              | Putative transporter, major facilitator family                                                                                          | Escherichia coli (strain 55989 / EAEC)          |
| 71752  | 4512289 | 4513281 TY-2482_chromosome | B7L662                                                              | Putative zinc-dependent hydrolase                                                                                                       | Escherichia coli (strain 55989 / EAEC)          |
| 59045  | 4513882 | 4513343 TY-2482_chromosome | B7L663                                                              | Putative acetyltransferase                                                                                                              | Escherichia coli (strain 55989 / EAEC)          |
| 83665  | 4514243 | 4513869 TY-2482_chromosome | B7L664                                                              | Putative uncharacterized protein                                                                                                        | Escherichia coli (strain 55989 / EAEC)          |
| 95243  | 4515297 | 4514365 TY-2482_chromosome | B5Z3T4                                                              | Protoheme IX farnesyltransferase (EC 2.5.1.-)                                                                                           | Escherichia coli O157:H7 (strain EC4115 / EHEC) |
| 102776 | 4515593 | 4515267 TY-2482_chromosome | B7L666                                                              | Cytochrome o ubiquinol oxidase subunit IV (EC 1.10.3.-)                                                                                 | Escherichia coli (strain 55989 / EAEC)          |
| 79108  | 4516207 | 4515596 TY-2482_chromosome | B7L667                                                              | Cytochrome o ubiquinol oxidase subunit III (EC 1.10.3.-)                                                                                | Escherichia coli (strain 55989 / EAEC)          |
| 65258  | 4518188 | 4516200 TY-2482_chromosome | B7L668                                                              | Cytochrome o ubiquinol oxidase subunit I (EC 1.10.3.-)                                                                                  | Escherichia coli (strain 55989 / EAEC)          |
| 95463  | 4519157 | 4518213 TY-2482_chromosome | B7L669                                                              | Cytochrome o ubiquinol oxidase subunit II (EC 1.10.3.-)                                                                                 | Escherichia coli (strain 55989 / EAEC)          |
| 80944  | 4521092 | 4519620 TY-2482_chromosome | B7L670                                                              | Muropeptide transporter                                                                                                                 | Escherichia coli (strain 55989 / EAEC)          |
| 96979  | 4521714 | 4521139 TY-2482_chromosome | B7L671                                                              | Putative lipoprotein                                                                                                                    | Escherichia coli (strain 55989 / EAEC)          |
| 80878  | 4522019 | 4522333 TY-2482_chromosome | B7L672                                                              | Regulator of penicillin binding proteins and beta lactamase transcription (Morphogene)                                                  | Escherichia coli (strain 55989 / EAEC)          |
| 34278  | 4522680 | 4523975 TY-2482_chromosome | B7L673                                                              | Trigger factor (TF)                                                                                                                     | Escherichia coli (strain 55989 / EAEC)          |
| 24357  | 4522685 | 4522266 TY-2482_chromosome | Q1RFA2                                                              | Putative uncharacterized protein                                                                                                        | Escherichia coli (strain UT189 / UPEC)          |
| 88240  | 4524224 | 4524844 TY-2482_chromosome | B7L674                                                              | ATP-dependent Clp protease proteolytic subunit (EC 3.4.21.92) (Endopeptidase Clp')                                                      | Escherichia coli (strain 55989 / EAEC)          |
| 20508  | 4524946 | 4524749 TY-2482_chromosome | E0QWE8                                                              | Putative uncharacterized protein                                                                                                        | Escherichia coli NC101                          |
| 30341  | 4524973 | 4526244 TY-2482_chromosome | B7L675                                                              | ATP-dependent Clp protease ATP-binding subunit ClpX                                                                                     | Escherichia coli (strain 55989 / EAEC)          |
| 95563  | 4526435 | 4528786 TY-2482_chromosome | B7L676                                                              | DNA-binding ATP-dependent protease La (EC 3.4.21.53)                                                                                    | Escherichia coli (strain 55989 / EAEC)          |
| 101828 | 4528998 | 4529267 TY-2482_chromosome | B7L677                                                              | HU, DNA-binding transcriptional regulator, beta subunit                                                                                 | Escherichia coli (strain 55989 / EAEC)          |
| 64180  | 4529462 | 4531330 TY-2482_chromosome | B7L678                                                              | Peptidyl-prolyl cis-trans isomerase (Rotamase D) (EC 5.2.1.8)                                                                           | Escherichia coli (strain 55989 / EAEC)          |
| 59041  | 4531484 | 4531852 TY-2482_chromosome | B7L679                                                              | Putative uncharacterized protein ybaV                                                                                                   | Escherichia coli (strain 55989 / EAEC)          |
| 91797  | 4531949 | 4532344 TY-2482_chromosome | B7L680                                                              | Putative uncharacterized protein ybaW                                                                                                   | Escherichia coli (strain 55989 / EAEC)          |
| 33233  | 4533094 | 4532402 TY-2482_chromosome | B7L681                                                              | 7-cyano-7-deazaguanine synthase (EC 6.3.-.-) (7-cyano-7-carbaguanine synthase) (PreQ(0) synthase) (Queuosine biosynthesis protein queP) | Escherichia coli (strain 55989 / EAEC)          |
| 106439 | 4534859 | 4533162 TY-2482_chromosome | B7L682                                                              | Putative uncharacterized protein ybaE                                                                                                   | Escherichia coli (strain 55989 / EAEC)          |
| 112659 | 4534947 | 4535774 TY-2482_chromosome | D3GV76                                                              | HMP-PP phosphatase (EC 3.6.1.-)                                                                                                         | Escherichia coli O44:H18 (strain O42 / EAEC)    |
| 58124  | 4535702 | 4536385 TY-2482_chromosome | B7L684                                                              | Putative DNA-binding transcriptional regulator (Lrp-like)                                                                               | Escherichia coli (strain 55989 / EAEC)          |
| 112246 | 4536418 | 4538187 TY-2482_chromosome | B7L685                                                              | Putative fused ATPase and permease component of metabolite transporter                                                                  | Escherichia coli (strain 55989 / EAEC)          |
| 79593  | 4538183 | 4539961 TY-2482_chromosome | B7L686                                                              | Putative fused ATPase and permease component of metabolite ABC transporter                                                              | Escherichia coli (strain 55989 / EAEC)          |
| 105529 | 4540145 | 4540480 TY-2482_chromosome | B7L687                                                              | Nitrogen assimilation regulatory protein for GlnL, GlnE, and AmtE                                                                       | Escherichia coli (strain 55989 / EAEC)          |
| 90842  | 4540513 | 4541796 TY-2482_chromosome | B7L689                                                              | Ammonium transporter                                                                                                                    | Escherichia coli (strain 55989 / EAEC)          |
| 106422 | 4542708 | 4541851 TY-2482_chromosome | B7L690                                                              | Acyl-CoA thioesterase II (EC 3.1.2.-)                                                                                                   | Escherichia coli (strain 55989 / EAEC)          |
| 94004  | 4542926 | 4543495 TY-2482_chromosome | B7L691                                                              | Putative lipoprotein                                                                                                                    | Escherichia coli (strain 55989 / EAEC)          |
| 25782  | 4543822 | 4544157 TY-2482_chromosome | B7MDX7                                                              | Putative uncharacterized protein                                                                                                        | Escherichia coli O45:K1 (strain S88 / ExPEC)    |
| 91798  | 4543918 | 4543532 TY-2482_chromosome | B7L692                                                              | Putative methylated DNA-protein cysteine alkyltransferase                                                                               | Escherichia coli (strain 55989 / EAEC)          |
| r189   | 4543995 | 4544108 TY-2482_chromosome | ref NC_010473 :415003-415116 -  [gene=ffs] [locus_tag=ECDH10B_0411] |                                                                                                                                         |                                                 |
| 82978  | 4544219 | 4544569 TY-2482_chromosome | B7L693                                                              | Putative uncharacterized protein ybaA                                                                                                   | Escherichia coli (strain 55989 / EAEC)          |
| 60963  | 4546164 | 4544617 TY-2482_chromosome | B7L694                                                              | Putative uncharacterized protein ylaB                                                                                                   | Escherichia coli (strain 55989 / EAEC)          |
| 94030  | 4546837 | 4546331 TY-2482_chromosome | D3GV87                                                              | Putative membrane protein                                                                                                               | Escherichia coli O44:H18 (strain O42 / EAEC)    |

|        |         |                            |                                                                      |                                                                                                           |                                                 |
|--------|---------|----------------------------|----------------------------------------------------------------------|-----------------------------------------------------------------------------------------------------------|-------------------------------------------------|
| 86624  | 4547465 | 4546917 TY-2482_chromosome | B7L696                                                               | Maltose O-acetyltransferase (EC 2.3.1.79)                                                                 | Escherichia coli (strain 55989 / EAEC)          |
| 75159  | 4548100 | 4547639 TY-2482_chromosome | B7L697                                                               | Modulator of gene expression, with H-NS                                                                   | Escherichia coli (strain 55989 / EAEC)          |
| 106423 | 4551949 | 4548803 TY-2482_chromosome | B7L699                                                               | Multidrug efflux system protein                                                                           | Escherichia coli (strain 55989 / EAEC)          |
| 88241  | 4553165 | 4551975 TY-2482_chromosome | B7L6A0                                                               | Multidrug efflux system                                                                                   | Escherichia coli (strain 55989 / EAEC)          |
| 106431 | 4553307 | 4553951 TY-2482_chromosome | B7L6A1                                                               | DNA-binding transcriptional repressor                                                                     | Escherichia coli (strain 55989 / EAEC)          |
| 78704  | 4554082 | 4557441 TY-2482_chromosome | B7L7E3                                                               | Putative uncharacterized protein kefA                                                                     | Escherichia coli (strain 55989 / EAEC)          |
| 73654  | 4558358 | 4557834 TY-2482_chromosome | B7L792                                                               | Primosomal replication protein N"                                                                         | Escherichia coli (strain 55989 / EAEC)          |
| 100846 | 4558428 | 4558802 TY-2482_chromosome | B7L793                                                               | Putative uncharacterized protein ybaN                                                                     | Escherichia coli (strain 55989 / EAEC)          |
| 29793  | 4558958 | 4559506 TY-2482_chromosome | B7L794                                                               | Adenine phosphoribosyltransferase (APRT) (EC 2.4.2.7)                                                     | Escherichia coli (strain 55989 / EAEC)          |
| 73688  | 4559638 | 4561566 TY-2482_chromosome | B7L795                                                               | DNA polymerase III/DNA elongation factor III, tau and gamma subunits (EC 2.7.7.7)                         | Escherichia coli (strain 55989 / EAEC)          |
| 33307  | 4561951 | 4562553 TY-2482_chromosome | B7L797                                                               | Recombination protein recR                                                                                | Escherichia coli (strain 55989 / EAEC)          |
| 11675  | 4561975 | 4561601 TY-2482_chromosome | P77122                                                               | Putative uncharacterized protein                                                                          | Escherichia coli                                |
| 90518  | 4562666 | 4564537 TY-2482_chromosome | B7L798                                                               | Chaperone protein htpG (Heat shock protein htpG) (High temperature protein G)                             | Escherichia coli (strain 55989 / EAEC)          |
| 109630 | 4564661 | 4565362 TY-2482_chromosome | B5Z3Y5                                                               | Adenylate kinase (AK) (EC 2.7.4.3) (ATP-AMP transphosphorylase)                                           | Escherichia coli O157:H7 (strain EC4115 / EHEC) |
| 31351  | 4565601 | 4566560 TY-2482_chromosome | B7L7A0                                                               | Ferrochelatase (EC 4.99.1.1) (Heme synthase) (Protoheme ferro-lyase)                                      | Escherichia coli (strain 55989 / EAEC)          |
| 29726  | 4567519 | 4566563 TY-2482_chromosome | B7L7A1                                                               | Acetyl esterase (EC 3.1.1.-)                                                                              | Escherichia coli (strain 55989 / EAEC)          |
| 66223  | 4567671 | 4568972 TY-2482_chromosome | B7L7A2                                                               | Inosine/guanosine kinase (EC 2.7.1.73)                                                                    | Escherichia coli (strain 55989 / EAEC)          |
| 75629  | 4570784 | 4569111 TY-2482_chromosome | B7L7A3                                                               | Putative monovalent cation:proton antiporter (CPA2 family)                                                | Escherichia coli (strain 55989 / EAEC)          |
| 66224  | 4572242 | 4571025 TY-2482_chromosome | B7L7A4                                                               | Fosmidomycin efflux system, member of the major facilitator superfamily                                   | Escherichia coli (strain 55989 / EAEC)          |
| 88284  | 4572460 | 4574109 TY-2482_chromosome | B7L7A5                                                               | Bifunctional UDP-sugar hydrolase and 5'-nucleotidase (EC 3.6.1.45)                                        | Escherichia coli (strain 55989 / EAEC)          |
| 80889  | 4574628 | 4574152 TY-2482_chromosome | B7L7A6                                                               | Putative uncharacterized protein ybaK                                                                     | Escherichia coli (strain 55989 / EAEC)          |
| r239   | 4574750 | 4574833 TY-2482_chromosome | ref NC_010473 :445759-445842 -  [gene=sroB] [locus_tag=ECDH10B_0438] |                                                                                                           |                                                 |
| 99110  | 4575626 | 4574835 TY-2482_chromosome | B7L7A7                                                               | Putative uncharacterized protein ybaP                                                                     | Escherichia coli (strain 55989 / EAEC)          |
| 113673 | 4575710 | 4576102 TY-2482_chromosome | B6I0D3                                                               | Putative uncharacterized protein                                                                          | Escherichia coli (strain SE11)                  |
| 113942 | 4578723 | 4576222 TY-2482_chromosome | B7L7A9                                                               | Copper transporter (EC 3.6.3.4)                                                                           | Escherichia coli (strain 55989 / EAEC)          |
| 112252 | 4578985 | 4579914 TY-2482_chromosome | B7L7B0                                                               | Glutaminase 1 (EC 3.5.1.2)                                                                                | Escherichia coli (strain 55989 / EAEC)          |
| 64367  | 4579920 | 4581209 TY-2482_chromosome | B7L7B1                                                               | Putative nitrogen-containing metabolite transporter                                                       | Escherichia coli (strain 55989 / EAEC)          |
| 113946 | 4581337 | 4581741 TY-2482_chromosome | B7L7B2                                                               | DNA-binding transcriptional activator of copper-responsive regulon genes                                  | Escherichia coli (strain 55989 / EAEC)          |
| 6154   | 4582203 | 4581748 TY-2482_chromosome | P0AAS3                                                               | Inner membrane protein ybbJ                                                                               | Escherichia coli (strain K12)                   |
| 75760  | 4583117 | 4582203 TY-2482_chromosome | B7L7B4                                                               | Putative protease, membrane anchored                                                                      | Escherichia coli (strain 55989 / EAEC)          |
| 99082  | 4583263 | 4583937 TY-2482_chromosome | B7L7B5                                                               | Putative transporter subunit: ATP-binding component of ABC superfamily                                    | Escherichia coli (strain 55989 / EAEC)          |
| 105269 | 4583927 | 4584703 TY-2482_chromosome | B7L7B6                                                               | Putative permease of an ABC transporter                                                                   | Escherichia coli (strain 55989 / EAEC)          |
| 85651  | 4585659 | 4584772 TY-2482_chromosome | D3GVD0                                                               | Thioredoxin-like protein                                                                                  | Escherichia coli O44:H18 (strain 042 / EAEC)    |
| 113947 | 4586493 | 4585687 TY-2482_chromosome | B7L7B8                                                               | Putative oxidoreductase with NAD(P)-binding Rossmann-fold superfamily                                     | Escherichia coli (strain 55989 / EAEC)          |
| 84510  | 4587077 | 4587760 TY-2482_chromosome | B7L7C0                                                               | Putative transporter subunit: ATP-binding component of ABC superfamily                                    | Escherichia coli (strain 55989 / EAEC)          |
| 115743 | 4587109 | 4586486 TY-2482_chromosome | B7L7B9                                                               | Multifunctional acyl-CoA thioesterase I and protease I and lysophospholipase L1 (EC 3.1.1.5) (EC 3.1.2.-) | Escherichia coli (strain 55989 / EAEC)          |
| 88285  | 4587760 | 4590171 TY-2482_chromosome | B7L7C1                                                               | Putative ABC transporter permease                                                                         | Escherichia coli (strain 55989 / EAEC)          |
| 88327  | 4590604 | 4594890 TY-2482_chromosome | B7L7C2                                                               | RhsD element protein                                                                                      | Escherichia coli (strain 55989 / EAEC)          |
| 68377  | 4594933 | 4595298 TY-2482_chromosome | B7L7C5                                                               | Putative uncharacterized protein ybbc                                                                     | Escherichia coli (strain 55989 / EAEC)          |
| 84517  | 4595301 | 4596008 TY-2482_chromosome | B7L7C6                                                               | Putative uncharacterized protein ylbH                                                                     | Escherichia coli (strain 55989 / EAEC)          |
| 88337  | 4595992 | 4596480 TY-2482_chromosome | B7L7C7                                                               | Putative uncharacterized protein                                                                          | Escherichia coli (strain 55989 / EAEC)          |
| 64166  | 4596983 | 4596771 TY-2482_chromosome | B7L7C8                                                               | Putative uncharacterized protein                                                                          | Escherichia coli (strain 55989 / EAEC)          |
| 79109  | 4597404 | 4596973 TY-2482_chromosome | B7L7C9                                                               | Putative regulator with homeodomain-like DNA binding domain                                               | Escherichia coli (strain 55989 / EAEC)          |
| 33924  | 4598578 | 4597487 TY-2482_chromosome | B7L7D0                                                               | tRNA 2-selenouridine synthase (EC 2.9.1.-) (Selenophosphate-dependent tRNA 2-selenouridine synthase)      | Escherichia coli (strain 55989 / EAEC)          |
| 87201  | 4599573 | 4598650 TY-2482_chromosome | B7L7D1                                                               | Putative DNA-binding transcriptional activator of the alid operon                                         | Escherichia coli (strain 55989 / EAEC)          |
| 29748  | 4599803 | 4600282 TY-2482_chromosome | B7L7D2                                                               | Ureidoglycolate hydrolase (EC 3.5.3.19)                                                                   | Escherichia coli (strain 55989 / EAEC)          |
| 113476 | 4600363 | 4601175 TY-2482_chromosome | B7L7D3                                                               | DNA-binding transcriptional repressor                                                                     | Escherichia coli (strain 55989 / EAEC)          |
| 87696  | 4601268 | 4603046 TY-2482_chromosome | B7L7D4                                                               | Glyoxylate carboligase (EC 4.1.1.47)                                                                      | Escherichia coli (strain 55989 / EAEC)          |
| 80890  | 4603062 | 4603835 TY-2482_chromosome | B7L7D5                                                               | Hydroxyppyruvate isomerase (EC 5.3.1.22)                                                                  | Escherichia coli (strain 55989 / EAEC)          |
| 98356  | 4603938 | 4604813 TY-2482_chromosome | B7L7D6                                                               | Tartronate semialdehyde reductase, NADH-dependent (EC 1.1.1.60)                                           | Escherichia coli (strain 55989 / EAEC)          |
| 113269 | 4604985 | 4606436 TY-2482_chromosome | B7L7D7                                                               | Allantoin or uracil transporter                                                                           | Escherichia coli (strain 55989 / EAEC)          |
| 29750  | 4606499 | 4607857 TY-2482_chromosome | B7L7D8                                                               | Allantoinase (EC 3.5.2.5) (Allantoin-utilizing enzyme)                                                    | Escherichia coli (strain 55989 / EAEC)          |
| 104403 | 4607917 | 4609215 TY-2482_chromosome | B7L7D9                                                               | Putative uracil/xanthine transporter                                                                      | Escherichia coli (strain 55989 / EAEC)          |
| 102005 | 4609240 | 4610382 TY-2482_chromosome | B7L7E0                                                               | Glycerate kinase II (EC 2.7.1.31)                                                                         | Escherichia coli (strain 55989 / EAEC)          |
| 88286  | 4611299 | 4610517 TY-2482_chromosome | B7L7E1                                                               | Putative uncharacterized protein ybA                                                                      | Escherichia coli (strain 55989 / EAEC)          |
| 83442  | 4612545 | 4611313 TY-2482_chromosome | B7L7E2                                                               | Allantoate amidohydrolase (EC 3.5.3.4)                                                                    | Escherichia coli (strain 55989 / EAEC)          |
| 68051  | 4613616 | 4612570 TY-2482_chromosome | B7L7E4                                                               | Ureidoglycolate dehydrogenase (EC 1.1.1.154)                                                              | Escherichia coli (strain 55989 / EAEC)          |
| 98398  | 4613933 | 4615597 TY-2482_chromosome | B7L7E5                                                               | Putative acyl-CoA synthetase with NAD(P)-binding Rossmann-fold domain                                     | Escherichia coli (strain 55989 / EAEC)          |
| 102806 | 4615610 | 4616866 TY-2482_chromosome | B7L7E6                                                               | Putative uncharacterized protein ylbE                                                                     | Escherichia coli (strain 55989 / EAEC)          |
| 93937  | 4616880 | 4617692 TY-2482_chromosome | B7L7E7                                                               | Putative uncharacterized protein ylbF                                                                     | Escherichia coli (strain 55989 / EAEC)          |
| 91823  | 4617692 | 4618582 TY-2482_chromosome | B7L7E8                                                               | Putative carbamate kinase                                                                                 | Escherichia coli (strain 55989 / EAEC)          |
| 21396  | 4618776 | 4618492 TY-2482_chromosome | P77130                                                               | Putative uncharacterized protein                                                                          | Escherichia coli                                |
| 105270 | 4619847 | 4618783 TY-2482_chromosome | B7L7E9                                                               | N5-carboxyaminoimidazole ribonucleotide synthase (EC 4.1.1.21)                                            | Escherichia coli (strain 55989 / EAEC)          |
| 113948 | 4620353 | 4619847 TY-2482_chromosome | B7L7F0                                                               | N5-carboxyaminoimidazole ribonucleotide mutase (EC 4.1.1.21)                                              | Escherichia coli (strain 55989 / EAEC)          |

|        |         |                            |               |                                                                                                                      |                                                      |
|--------|---------|----------------------------|---------------|----------------------------------------------------------------------------------------------------------------------|------------------------------------------------------|
| 14246  | 4621184 | 4621867 TY-2482_chromosome | P77131        | Putative uncharacterized protein                                                                                     | Escherichia coli                                     |
| 31978  | 4621193 | 4620474 TY-2482_chromosome | B7L7F1        | UDP-2,3-diacetylglucosamine hydrolase (EC 3.6.1.-)                                                                   | Escherichia coli (strain 55989 / EAEC)               |
| 34082  | 4621864 | 4623246 TY-2482_chromosome | B7L7F3        | Cysteinyl-tRNA synthetase (EC 6.1.1.16) (Cysteine--tRNA ligase) (CysRS)                                              | Escherichia coli (strain 55989 / EAEC)               |
| 88287  | 4623806 | 4623288 TY-2482_chromosome | B7L7F4        | Putative uncharacterized protein ybcI                                                                                | Escherichia coli (strain 55989 / EAEC)               |
| 29254  | 4623892 | 4624146 TY-2482_chromosome | Q1RF06        | Putative uncharacterized protein                                                                                     | Escherichia coli (strain UT189 / UPEC)               |
| 31006  | 4624994 | 4624131 TY-2482_chromosome | B7L7F6        | Bifunctional protein FcID [Includes: Methylenetetrahydrofolate dehydrogenase (EC 1.5.1.5); Methylenetetrahydrofolate | Escherichia coli (strain 55989 / EAEC)               |
| 112087 | 4625475 | 4626014 TY-2482_chromosome | B7L7F7        | Putative fimbrial-like adhesin protein                                                                               | Escherichia coli (strain 55989 / EAEC)               |
| 90508  | 4626237 | 4626926 TY-2482_chromosome | B7L8D6        | Pilin chaperone, periplasmic                                                                                         | Escherichia coli (strain 55989 / EAEC)               |
| 88260  | 4626960 | 4629566 TY-2482_chromosome | B7L8D7        | Putative outer membrane export usher protein                                                                         | Escherichia coli (strain 55989 / EAEC)               |
| 110649 | 4629612 | 4630586 TY-2482_chromosome | B7L8D8        | Putative fimbrial-like adhesin protein                                                                               | Escherichia coli (strain 55989 / EAEC)               |
| 112178 | 4630600 | 4631112 TY-2482_chromosome | B7L8D9        | Putative fimbrial-like adhesin protein                                                                               | Escherichia coli (strain 55989 / EAEC)               |
| 58505  | 4631750 | 4631121 TY-2482_chromosome | B7L8E0        | DNA-binding transcriptional regulator, isolated component of a two-component regulator system                        | Escherichia coli (strain 55989 / EAEC)               |
| r296   | 4631993 | 4632069 TY-2482_chromosome | ref NC_010473 | :503278-503354 Arg tRNA  [gene=argU] [locus_tag=ECDH10B_0492]                                                        |                                                      |
| 88271  | 4632876 | 4632118 TY-2482_chromosome | B7L8E2        | DNA-binding transcriptional activator of porin biosynthesis;                                                         | Escherichia coli (strain 55989 / EAEC)               |
| 10187  | 4632933 | 4633142 TY-2482_chromosome | P77089        | Putative uncharacterized protein                                                                                     | Escherichia coli                                     |
| 100983 | 4633949 | 4633062 TY-2482_chromosome | B7L8E3        | Putative uncharacterized protein ybcH                                                                                | Escherichia coli (strain 55989 / EAEC)               |
| 111641 | 4636922 | 4633953 TY-2482_chromosome | B7L8E4        | Bacteriophage N4 receptor, outer membrane subunit                                                                    | Escherichia coli (strain 55989 / EAEC)               |
| 79470  | 4639146 | 4636912 TY-2482_chromosome | B7L8E5        | Bacteriophage N4 receptor, inner membrane subunit                                                                    | Escherichia coli (strain 55989 / EAEC)               |
| 73669  | 4640551 | 4639418 TY-2482_chromosome | B7L8E6        | Putative transposase                                                                                                 | Escherichia coli (strain 55989 / EAEC)               |
| 90143  | 4640966 | 4640658 TY-2482_chromosome | B7L8E7        | Putative uncharacterized protein                                                                                     | Escherichia coli (strain 55989 / EAEC)               |
| 73675  | 4641332 | 4641084 TY-2482_chromosome | B7L8E8        | Putative uncharacterized protein                                                                                     | Escherichia coli (strain 55989 / EAEC)               |
| 65474  | 4646191 | 4641332 TY-2482_chromosome | B7L8E9        | Rhs core protein with extension                                                                                      | Escherichia coli (strain 55989 / EAEC)               |
| 91812  | 4646672 | 4646214 TY-2482_chromosome | B7L8F0        | Putative uncharacterized protein                                                                                     | Escherichia coli (strain 55989 / EAEC)               |
| 91840  | 4648601 | 4646703 TY-2482_chromosome | B7L8F1        | Putative Rhs element Vgr protein                                                                                     | Escherichia coli (strain 55989 / EAEC)               |
| 83403  | 4650798 | 4649341 TY-2482_chromosome | B7L8F2        | Sensory histidine kinase in two-component regulatory system with CusR, senses copper ions                            | Escherichia coli (strain 55989 / EAEC)               |
| 83541  | 4651459 | 4650779 TY-2482_chromosome | B7L8F3        | DNA-binding response regulator in two-component regulatory system with CusS                                          | Escherichia coli (strain 55989 / EAEC)               |
| 79766  | 4651616 | 4652995 TY-2482_chromosome | B7L8F4        | Copper/silver efflux system, outer membrane component                                                                | Escherichia coli (strain 55989 / EAEC)               |
| 86185  | 4653022 | 4653351 TY-2482_chromosome | B7L8F5        | Periplasmic copper-binding protein                                                                                   | Escherichia coli (strain 55989 / EAEC)               |
| 75615  | 4653370 | 4654590 TY-2482_chromosome | B7L8F6        | Copper/silver efflux system, membrane fusion protein                                                                 | Escherichia coli (strain 55989 / EAEC)               |
| 114018 | 4654605 | 4657745 TY-2482_chromosome | B7L8F7        | Copper/silver efflux system, membrane component                                                                      | Escherichia coli (strain 55989 / EAEC)               |
| 76038  | 4657850 | 4659223 TY-2482_chromosome | B7L8F8        | Phenylalanine transporter                                                                                            | Escherichia coli (strain 55989 / EAEC)               |
| 61037  | 4660541 | 4659297 TY-2482_chromosome | B7L8F9        | Putative membrane protein; putative channel                                                                          | Escherichia coli (strain 55989 / EAEC)               |
| 93727  | 4661302 | 4660652 TY-2482_chromosome | B7L8G0        | Dihydropteridine reductase, NAD(P)H-dependent, oxygen-insensitive (EC 1.5.1.34)                                      | Escherichia coli (strain 55989 / EAEC)               |
| 28022  | 4661884 | 4661399 TY-2482_chromosome | B7N9I3        | Putative uncharacterized protein ybdF                                                                                | Escherichia coli O17:K52:H18 (strain UMN026 / ExPEC) |
| 93377  | 4662077 | 4661832 TY-2482_chromosome | B7L8G2        | Putative uncharacterized protein ybdJ                                                                                | Escherichia coli (strain 55989 / EAEC)               |
| 30182  | 4663261 | 4662146 TY-2482_chromosome | B7L8G3        | Carboxylate-amine ligase YbdK (EC 6.3.-.-)                                                                           | Escherichia coli (strain 55989 / EAEC)               |
| 25028  | 4663734 | 4663468 TY-2482_chromosome | A1A8L3        | Putative uncharacterized protein                                                                                     | Escherichia coli O1:K1 / APEC                        |
| 5324   | 4663932 | 4665041 TY-2482_chromosome | P11901        | Transposase for insertion sequence element IS421                                                                     | Escherichia coli                                     |
| 63961  | 4665410 | 4665704 TY-2482_chromosome | D2NE71        | Putative uncharacterized protein                                                                                     | Escherichia coli O150:H5 (strain SE15)               |
| 5321   | 4667012 | 4665903 TY-2482_chromosome | P11901        | Transposase for insertion sequence element IS421                                                                     | Escherichia coli                                     |
| 60849  | 4667921 | 4667181 TY-2482_chromosome | D3GW2C        | 4'-phosphopantetheinyl transferase (Enterobactin synthetase component D) (EC 2.7.8.-)                                | Escherichia coli O44:H18 (strain 042 / EAEC)         |
| 21530  | 4670206 | 4670478 TY-2482_chromosome | D8E8Y6        | Conserved domain protein                                                                                             | Escherichia coli MS 119-7                            |
| 77394  | 4670213 | 4667976 TY-2482_chromosome | B7L8G6        | Iron-enterobactin outer membrane transporter                                                                         | Escherichia coli (strain 55989 / EAEC)               |
| 82545  | 4670534 | 4671655 TY-2482_chromosome | B7L8G7        | Enterobactin/ferric enterobactin esterase                                                                            | Escherichia coli (strain 55989 / EAEC)               |
| 75382  | 4671661 | 4671876 TY-2482_chromosome | B7L8G8        | Putative uncharacterized protein ybdZ                                                                                | Escherichia coli (strain 55989 / EAEC)               |
| 73710  | 4671876 | 4675754 TY-2482_chromosome | B7L8G9        | Enterobactin synthase multienzyme complex component, ATP-dependent (EC 2.7.7.-)                                      | Escherichia coli (strain 55989 / EAEC)               |
| 100907 | 4675973 | 4677103 TY-2482_chromosome | B7L8H0        | Regulator of length of O-antigen component of lipopolysaccharide chain;                                              | Escherichia coli (strain 55989 / EAEC)               |
| 62754  | 4677918 | 4677106 TY-2482_chromosome | B7L8H1        | Iron-enterobactin transporter subunit ; ATP-binding component of ABC superfamily                                     | Escherichia coli (strain 55989 / EAEC)               |
| 68190  | 4678907 | 4677918 TY-2482_chromosome | B7L8H2        | Iron-enterobactin transporter subunit ; membrane component of ABC superfamily                                        | Escherichia coli (strain 55989 / EAEC)               |
| 100772 | 4679908 | 4678907 TY-2482_chromosome | B7L8H3        | Iron-enterobactin transporter subunit ; membrane component of ABC superfamily                                        | Escherichia coli (strain 55989 / EAEC)               |
| 30777  | 4680019 | 4681266 TY-2482_chromosome | B7L8H4        | Enterobactin exporter EntS                                                                                           | Escherichia coli (strain 55989 / EAEC)               |
| 93354  | 4682229 | 4681276 TY-2482_chromosome | B7L8H5        | Iron-enterobactin transporter subunit ; periplasmic-binding component of ABC superfamily                             | Escherichia coli (strain 55989 / EAEC)               |
| 68945  | 4682604 | 4683776 TY-2482_chromosome | B7L8H6        | Isochorismate synthase 1 (EC 5.4.4.2)                                                                                | Escherichia coli (strain 55989 / EAEC)               |
| 83226  | 4683789 | 4685396 TY-2482_chromosome | B7L8H7        | 2,3-dihydroxybenzoate-AMP ligase component of enterobactin synthase multienzyme complex (EC 2.7.7.58)                | Escherichia coli (strain 55989 / EAEC)               |
| 91330  | 4685413 | 4686267 TY-2482_chromosome | B7L8H8        | Isochorismatase (EC 3.3.2.1)                                                                                         | Escherichia coli (strain 55989 / EAEC)               |
| 97846  | 4686270 | 4687013 TY-2482_chromosome | B7L8H9        | 2,3-dihydro-2,3-dihydroxybenzoate dehydrogenase (EC 1.3.1.28)                                                        | Escherichia coli (strain 55989 / EAEC)               |
| 112831 | 4687019 | 4687429 TY-2482_chromosome | B7L8I0        | Putative esterase (EC 3.1.-.-)                                                                                       | Escherichia coli (strain 55989 / EAEC)               |
| 69992  | 4687613 | 4689715 TY-2482_chromosome | B7L8I1        | Carbon starvation protein                                                                                            | Escherichia coli (strain 55989 / EAEC)               |
| 64176  | 4689900 | 4690094 TY-2482_chromosome | B7L8I2        | Putative uncharacterized protein ybdD                                                                                | Escherichia coli (strain 55989 / EAEC)               |
| 81004  | 4691195 | 4690110 TY-2482_chromosome | B7L8I3        | Putative oxidoreductase (EC 1.1.1.-)                                                                                 | Escherichia coli (strain 55989 / EAEC)               |
| 76077  | 4691304 | 4692461 TY-2482_chromosome | B7L8I4        | Methionine aminotransferase, PLP-dependent (EC 2.6.1.-)                                                              | Escherichia coli (strain 55989 / EAEC)               |
| 73712  | 4693094 | 4692468 TY-2482_chromosome | B7L8I5        | Immunoglobulin-binding regulator                                                                                     | Escherichia coli (strain 55989 / EAEC)               |
| 83905  | 4694287 | 4693070 TY-2482_chromosome | B7L8I6        | Immunoglobulin-binding regulator                                                                                     | Escherichia coli (strain 55989 / EAEC)               |
| 76345  | 4695336 | 4694437 TY-2482_chromosome | B7L8I7        | Putative DNA-binding transcriptional regulator, LysR-type                                                            | Escherichia coli (strain 55989 / EAEC)               |



|        |         |                            |                                                                            |                                                                                                                        |                                                  |
|--------|---------|----------------------------|----------------------------------------------------------------------------|------------------------------------------------------------------------------------------------------------------------|--------------------------------------------------|
| 77572  | 4696291 | 4695548 TY-2482_chromosome | B7L818                                                                     | Periplasmic disulfide isomerase/thiol-disulphide oxidase (EC 5.3.4.1)                                                  | Escherichia coli (strain 55989 / EAEC)           |
| 91889  | 4696663 | 4697223 TY-2482_chromosome | B7L819                                                                     | Alkyl hydroperoxide reductase, C22 subunit (EC 1.11.1.15)                                                              | Escherichia coli (strain 55989 / EAEC)           |
| 98016  | 4697355 | 4698917 TY-2482_chromosome | B7L810                                                                     | Alkyl hydroperoxide reductase, F52a subunit, FAD/NAD(P)-binding (EC 1.11.1.15)                                         | Escherichia coli (strain 55989 / EAEC)           |
| 60678  | 4699469 | 4699044 TY-2482_chromosome | B7L811                                                                     | Universal stress protein UP12                                                                                          | Escherichia coli (strain 55989 / EAEC)           |
| 62757  | 4699690 | 4700925 TY-2482_chromosome | B7L812                                                                     | Putative oxidoreductase, Zn-dependent and NAD(P)-binding                                                               | Escherichia coli (strain 55989 / EAEC)           |
| 8599   | 4701009 | 4701467 TY-2482_chromosome | C3TJV7                                                                     | Putative uncharacterized protein                                                                                       | Escherichia coli                                 |
| 107924 | 4702623 | 4701802 TY-2482_chromosome | D3GX75                                                                     | Ribonuclease I                                                                                                         | Escherichia coli O44:H18 (strain 042 / EAEC)     |
| 88380  | 4704182 | 4702722 TY-2482_chromosome | B7L815                                                                     | Citrate:succinate antiporter                                                                                           | Escherichia coli (strain 55989 / EAEC)           |
| 30314  | 4705111 | 4704236 TY-2482_chromosome | B7L816                                                                     | 2-(5''-triphosphoribosyl)-3'-dephosphocoenzyme-A synthase (2-(5''-triphosphoribosyl)-3'-dephospho-CoA synthase)        | Escherichia coli (strain 55989 / EAEC)           |
| 27577  | 4705605 | 4706996 TY-2482_chromosome | Q1REU7                                                                     | Putative uncharacterized protein                                                                                       | Escherichia coli (strain UT189 / UPEC)           |
| 30315  | 4705637 | 4705089 TY-2482_chromosome | B7L817                                                                     | Probable apo-citrate lyase phosphoribosyl-dephospho-CoA transferase (EC 2.7.7.61) (Apo-ACP nucleodityltransferase)     | Escherichia coli (strain 55989 / EAEC)           |
| 29236  | 4707175 | 4708218 TY-2482_chromosome | Q1REU5                                                                     | Putative uncharacterized protein                                                                                       | Escherichia coli (strain UT189 / UPEC)           |
| 84003  | 4709458 | 4708403 TY-2482_chromosome | B7L8K1                                                                     | Citrate lyase synthetase (EC 6.2.1.22)                                                                                 | Escherichia coli (strain 55989 / EAEC)           |
| 60463  | 4709838 | 4711493 TY-2482_chromosome | B7L8K2                                                                     | Sensory histidine kinase in two-component regulatory system with citB                                                  | Escherichia coli (strain 55989 / EAEC)           |
| 101547 | 4711465 | 4712142 TY-2482_chromosome | B7L8K3                                                                     | DNA-binding response regulator in two-component regulatory system with citA                                            | Escherichia coli (strain 55989 / EAEC)           |
| 109556 | 4713571 | 4712189 TY-2482_chromosome | B7L8K4                                                                     | Anaerobic C4-dicarboxylate transport                                                                                   | Escherichia coli (strain 55989 / EAEC)           |
| 15063  | 4713931 | 4713713 TY-2482_chromosome | D7ZY80                                                                     | Conserved domain protein                                                                                               | Escherichia coli MS 187-1                        |
| 106366 | 4714160 | 4714717 TY-2482_chromosome | B7L9L5                                                                     | Palmitoyl transferase for Lipid A (EC 2.3.1.-)                                                                         | Escherichia coli (strain 55989 / EAEC)           |
| 36534  | 4714865 | 4715101 TY-2482_chromosome | Q8D127                                                                     | Cold shock protein (Putative cold shock protein)                                                                       | Yersinia pestis                                  |
| 30407  | 4715541 | 4715161 TY-2482_chromosome | B7L9G9                                                                     | Protein CrcB homolog                                                                                                   | Escherichia coli (strain 55989 / EAEC)           |
| 86278  | 4715634 | 4716419 TY-2482_chromosome | C8UJ2                                                                      | Predicted amidase                                                                                                      | Escherichia coli O111:H- (strain 11128 / EHEC)   |
| 113180 | 4716551 | 4716751 TY-2482_chromosome | B7L9H1                                                                     | Sec-independent protein translocase protein tatA/E homolog 1                                                           | Escherichia coli (strain 55989 / EAEC)           |
| 31889  | 4717820 | 4716858 TY-2482_chromosome | B7L9H2                                                                     | Lipoyl synthase (EC 2.8.1.8) (Lip-syn) (LS) (Lipoate synthase) (Lipoic acid synthase) (Sulfur insertion protein lipA)  | Escherichia coli (strain 55989 / EAEC)           |
| 97925  | 4718982 | 4718032 TY-2482_chromosome | B7L9H3                                                                     | Putative DNA-binding transcriptional regulator, LysR-type                                                              | Escherichia coli (strain 55989 / EAEC)           |
| 110097 | 4719882 | 4719244 TY-2482_chromosome | C6V152                                                                     | Octanoyltransferase (EC 2.3.1.181) (Lipoate-protein ligase B) (Lipoyl/octanoyl transferase) (Octanoyl-acyl-carrier-pro | Escherichia coli O157:H7 (strain TW14359 / EHEC) |
| 34755  | 4720246 | 4719986 TY-2482_chromosome | B7L9H5                                                                     | UPF0250 protein ybeD                                                                                                   | Escherichia coli (strain 55989 / EAEC)           |
| 88512  | 4721568 | 4720360 TY-2482_chromosome | B7L9H6                                                                     | D-alanyl-D-alanine carboxypeptidase (Penicillin-binding protein 5) (EC 3.4.16.4)                                       | Escherichia coli (strain 55989 / EAEC)           |
| 59095  | 4722795 | 4721710 TY-2482_chromosome | B7L9H7                                                                     | Minor lipoprotein                                                                                                      | Escherichia coli (strain 55989 / EAEC)           |
| 58394  | 4723918 | 4722809 TY-2482_chromosome | B7L9H8                                                                     | Cell wall shape-determining protein                                                                                    | Escherichia coli (strain 55989 / EAEC)           |
| 88378  | 4725822 | 4723924 TY-2482_chromosome | B7L9H9                                                                     | Transpeptidase involved in peptidoglycan synthesis (Penicillin-binding protein 2)                                      | Escherichia coli (strain 55989 / EAEC)           |
| 33571  | 4726320 | 4725856 TY-2482_chromosome | B7L9I0                                                                     | Ribosomal RNA large subunit methyltransferase H (EC 2.1.1.-) (23S rRNA m3Psi1915 methyltransferase) (rRNA (pseud       | Escherichia coli (strain 55989 / EAEC)           |
| 83597  | 4726641 | 4726327 TY-2482_chromosome | B7L9I1                                                                     | Putative uncharacterized protein ybeB                                                                                  | Escherichia coli (strain 55989 / EAEC)           |
| 15973  | 4726655 | 4726942 TY-2482_chromosome | P77108                                                                     | Putative uncharacterized protein                                                                                       | Escherichia coli                                 |
| 80471  | 4727512 | 4726904 TY-2482_chromosome | B7L9I2                                                                     | Putative phosphatase with phosphoglycerate mutase domain                                                               | Escherichia coli (strain 55989 / EAEC)           |
| 76395  | 4728177 | 4727539 TY-2482_chromosome | B7L9I3                                                                     | Probable nicotinate-nucleotide adenyltransferase (EC 2.7.7.18) (Deamido-NAD(+) diphosphorylase) (Deamido-NAD(          | Escherichia coli (strain 55989 / EAEC)           |
| 88340  | 4729210 | 4728182 TY-2482_chromosome | B7L9I4                                                                     | DNA polymerase III, delta subunit (EC 2.7.7.7)                                                                         | Escherichia coli (strain 55989 / EAEC)           |
| 31960  | 4729791 | 4729213 TY-2482_chromosome | B7L9I5                                                                     | LPS-assembly lipoprotein lptE                                                                                          | Escherichia coli (strain 55989 / EAEC)           |
| 34129  | 4732388 | 4729809 TY-2482_chromosome | B7L9I6                                                                     | Leucyl-tRNA synthetase (EC 6.1.1.4) (Leucine--tRNA ligase) (LeuRS)                                                     | Escherichia coli (strain 55989 / EAEC)           |
| 100715 | 4732623 | 4733102 TY-2482_chromosome | B7L9I7                                                                     | Putative uncharacterized protein ybeL                                                                                  | Escherichia coli (strain 55989 / EAEC)           |
| 62750  | 4734152 | 4733178 TY-2482_chromosome | B7L9I8                                                                     | Putative uncharacterized protein ybeQ                                                                                  | Escherichia coli (strain 55989 / EAEC)           |
| 66245  | 4734316 | 4735020 TY-2482_chromosome | B7L9I9                                                                     | Putative uncharacterized protein ybeR                                                                                  | Escherichia coli (strain 55989 / EAEC)           |
| 90501  | 4735020 | 4736444 TY-2482_chromosome | B7L9J0                                                                     | Putative DnaJ-class chaperone                                                                                          | Escherichia coli (strain 55989 / EAEC)           |
| 82605  | 4737011 | 4736460 TY-2482_chromosome | B7L9J1                                                                     | Putative uncharacterized protein ybeT                                                                                  | Escherichia coli (strain 55989 / EAEC)           |
| 80974  | 4737112 | 4737816 TY-2482_chromosome | B7L9J2                                                                     | Putative uncharacterized protein ybeU                                                                                  | Escherichia coli (strain 55989 / EAEC)           |
| 110650 | 4737816 | 4739264 TY-2482_chromosome | B7L9J3                                                                     | Hsc56 co-chaperone of HscC                                                                                             | Escherichia coli (strain 55989 / EAEC)           |
| 115924 | 4740997 | 4739330 TY-2482_chromosome | C8TKH1                                                                     | Hsp70 family chaperone Hsc62                                                                                           | Escherichia coli O26:H11 (strain 11368 / EHEC)   |
| 33405  | 4742016 | 4741084 TY-2482_chromosome | B7L9J7                                                                     | Pyrimidine-specific ribonucleoside hydrolase riHA (EC 3.2.-.-) (Cytidine/uridine-specific hydrolase                    | Escherichia coli (strain 55989 / EAEC)           |
| 80976  | 4742859 | 4742137 TY-2482_chromosome | B7L9I8                                                                     | Glutamate and aspartate transporter subunit ; ATP-binding component of ABC superfamily                                 | Escherichia coli (strain 55989 / EAEC)           |
| 66247  | 4743533 | 4742862 TY-2482_chromosome | B7L9I9                                                                     | Glutamate and aspartate transporter subunit ; membrane component of ABC superfamily                                    | Escherichia coli (strain 55989 / EAEC)           |
| 99899  | 4744273 | 4743536 TY-2482_chromosome | B7L9K0                                                                     | Glutamate and aspartate transporter subunit ; membrane component of ABC superfamily                                    | Escherichia coli (strain 55989 / EAEC)           |
| 80992  | 4745351 | 4744446 TY-2482_chromosome | B7L9K1                                                                     | Glutamate and aspartate transporter subunit ; periplasmic-binding component of ABC superfamily                         | Escherichia coli (strain 55989 / EAEC)           |
| 114309 | 4745806 | 4747679 TY-2482_chromosome | C8U318                                                                     | Rhomboid family protein                                                                                                | Escherichia coli O103:H2 (strain 12009 / EHEC)   |
| 15678  | 4747651 | 4747857 TY-2482_chromosome | C5W100                                                                     | Ybl25                                                                                                                  | Escherichia coli (strain B / BL21)               |
| 73258  | 4749298 | 4747763 TY-2482_chromosome | B7L9K4                                                                     | Apolipoprotein N-acyltransferase (EC 2.3.1.-)                                                                          | Escherichia coli (strain 55989 / EAEC)           |
| 68290  | 4750201 | 4749326 TY-2482_chromosome | B7L9K5                                                                     | Putative uncharacterized protein ybeX                                                                                  | Escherichia coli (strain 55989 / EAEC)           |
| 33695  | 4750758 | 4750294 TY-2482_chromosome | B7L9K6                                                                     | Probable rRNA maturation factor YbeY                                                                                   | Escherichia coli (strain 55989 / EAEC)           |
| 84577  | 4751834 | 4750758 TY-2482_chromosome | B7L9K7                                                                     | Putative enzyme with nucleoside triphosphate hydrolase domain                                                          | Escherichia coli (strain 55989 / EAEC)           |
| 32397  | 4753372 | 4751951 TY-2482_chromosome | B7L9K8                                                                     | (Dimethylallyl)adenosine tRNA methylthiotransferase miaB (EC 2.-.-.-) (tRNA-i(6)A37 methylthiotransferase)             | Escherichia coli (strain 55989 / EAEC)           |
| 91883  | 4753518 | 4754690 TY-2482_chromosome | B7L9K9                                                                     | 2-octaprenyl-3-methyl-6-methoxy-1,4-benzoquinol oxygenase (EC 1.14.13.-)                                               | Escherichia coli (strain 55989 / EAEC)           |
| 28642  | 4754844 | 4755122 TY-2482_chromosome | A1A8T1                                                                     | Putative uncharacterized protein                                                                                       | Escherichia coli O1:K1 / APEC                    |
| r488   | 4754921 | 4754847 TY-2482_chromosome | ref NC_010473 :748357-748431 Gln tRNA [gene=glnV] [locus_tag=ECDH10B_0733] |                                                                                                                        |                                                  |
| r487   | 4755033 | 4754959 TY-2482_chromosome | ref NC_010473 :748357-748431 Gln tRNA [gene=glnV] [locus_tag=ECDH10B_0733] |                                                                                                                        |                                                  |
| r293   | 4755158 | 4755082 TY-2482_chromosome | ref NC_010473 :748872-748948 Met tRNA [gene=metT] [locus_tag=ECDH10B_0738] |                                                                                                                        |                                                  |
| r480   | 4755248 | 4755174 TY-2482_chromosome | ref NC_010473 :748680-748754 Gln tRNA [gene=glnU] [locus_tag=ECDH10B_0736] |                                                                                                                        |                                                  |

|        |         |                            |                                       |                                                                                                                                |                                                 |
|--------|---------|----------------------------|---------------------------------------|--------------------------------------------------------------------------------------------------------------------------------|-------------------------------------------------|
| 24649  | 4755282 | 4755528 TY-2482_chromosome | A1A8T2                                | Putative uncharacterized protein                                                                                               | Escherichia coli O1:K1 / APEC                   |
| r479   | 4755357 | 4755283 TY-2482_chromosome | ref NC_010473 :748680-748754 Gln tRNA | [gene=glnU] [locus_tag=ECDH10B_0736]                                                                                           |                                                 |
| r238   | 4755465 | 4755381 TY-2482_chromosome | ref NC_010473 :748778-748862 Leu tRNA | [gene=leuW] [locus_tag=ECDH10B_0737]                                                                                           |                                                 |
| r292   | 4755550 | 4755474 TY-2482_chromosome | ref NC_010473 :748872-748948 Met tRNA | [gene=metT] [locus_tag=ECDH10B_0738]                                                                                           |                                                 |
| 18655  | 4755594 | 4755785 TY-2482_chromosome | D8ENZ6                                | Conserved domain protein                                                                                                       | Escherichia coli MS 107-1                       |
| 95542  | 4757595 | 4755934 TY-2482_chromosome | B7L9L0                                | Asparagine synthetase B (EC 6.3.5.4)                                                                                           | Escherichia coli (strain 55989 / EAEC)          |
| 16063  | 4757830 | 4757552 TY-2482_chromosome | D8C3Y4                                | Conserved domain protein                                                                                                       | Escherichia coli MS 196-1                       |
| 71648  | 4758604 | 4757855 TY-2482_chromosome | B7L9L1                                | NMP phosphatase                                                                                                                | Escherichia coli (strain 55989 / EAEC)          |
| 113968 | 4759872 | 4758655 TY-2482_chromosome | B7L9L2                                | DNA-binding transcriptional dual regulator, repressor of N-acetylglucosamine                                                   | Escherichia coli (strain 55989 / EAEC)          |
| 87877  | 4761029 | 4759884 TY-2482_chromosome | B7L9L3                                | N-acetylglucosamine-6-phosphate deacetylase (EC 3.5.1.25)                                                                      | Escherichia coli (strain 55989 / EAEC)          |
| 32598  | 4761889 | 4761092 TY-2482_chromosome | B7L9L4                                | Glucosamine-6-phosphate deaminase (EC 3.5.99.6) (GlcN6P deaminase) (GNPDA) (Glucosamine-6-phosphate isomerase)                 | Escherichia coli (strain 55989 / EAEC)          |
| 110658 | 4762222 | 4764165 TY-2482_chromosome | B7L9L6                                | Fused N-acetyl glucosamine specific PTS enzymes: IIC component ; IIB component ; IIA component (EC 2.7.1.69)                   | Escherichia coli (strain 55989 / EAEC)          |
| 34163  | 4764371 | 4766032 TY-2482_chromosome | B7L9L7                                | Glutaminyl-tRNA synthetase (EC 6.1.1.18) (Glutamine--tRNA ligase) (GlnRS)                                                      | Escherichia coli (strain 55989 / EAEC)          |
| 99025  | 4766481 | 4767884 TY-2482_chromosome | B7L9L8                                | Putative outer membrane porin                                                                                                  | Escherichia coli (strain 55989 / EAEC)          |
| 75614  | 4767937 | 4768260 TY-2482_chromosome | B7L9L9                                | Putative lipoprotein                                                                                                           | Escherichia coli (strain 55989 / EAEC)          |
| 86265  | 4768793 | 4768350 TY-2482_chromosome | B7L9M0                                | DNA-binding transcriptional dual regulator of siderophore biosynthesis and transport                                           | Escherichia coli (strain 55989 / EAEC)          |
| 59096  | 4768838 | 4769089 TY-2482_chromosome | B7L9M1                                | Putative uncharacterized protein                                                                                               | Escherichia coli (strain 55989 / EAEC)          |
| 61721  | 4769729 | 4769085 TY-2482_chromosome | D3GXDE6                               | Flavodoxin 1                                                                                                                   | Escherichia coli O44:H18 (strain 042 / EAEC)    |
| 106113 | 4770114 | 4769755 TY-2482_chromosome | B5YQM9                                | Ribbon-helix-helix protein, CopG family                                                                                        | Escherichia coli O157:H7 (strain EC4115 / EHEC) |
| 86050  | 4770949 | 4770188 TY-2482_chromosome | B7L9M4                                | Putative esterase                                                                                                              | Escherichia coli (strain 55989 / EAEC)          |
| 69562  | 4770999 | 4771676 TY-2482_chromosome | D3GXDN9                               | Negative modulator of initiation of replication                                                                                | Escherichia coli O44:H18 (strain 042 / EAEC)    |
| 109385 | 4771705 | 4773342 TY-2482_chromosome | B7L9M6                                | Phosphoglucosmutase (EC 5.4.2.2)                                                                                               | Escherichia coli (strain 55989 / EAEC)          |
| 71418  | 4774720 | 4773404 TY-2482_chromosome | B7L9M7                                | Putrescine/proton symporter: putrescine/ornithine antiporter                                                                   | Escherichia coli (strain 55989 / EAEC)          |
| 90444  | 4776915 | 4774720 TY-2482_chromosome | B7L9M8                                | Ornithine decarboxylase isozyme, inducible (EC 4.1.1.17)                                                                       | Escherichia coli (strain 55989 / EAEC)          |
| 114783 | 4778282 | 4777608 TY-2482_chromosome | C8UJZ6                                | DNA-binding response regulator KdpE in two-component regulatory system with KdpD                                               | Escherichia coli O111:H- (strain 11128 / EHEC)  |
| 84591  | 4780963 | 4778282 TY-2482_chromosome | B7LAF0                                | Fused sensory histidine kinase in two-component regulatory system with KdpE: signal sensing protein ; sensory histidine kinase | Escherichia coli (strain 55989 / EAEC)          |
| 30035  | 4781528 | 4780959 TY-2482_chromosome | B7LAA3                                | Potassium-transporting ATPase C chain (EC 3.6.3.12) (ATP phosphohydrolase [potassium-transporting] C chain) (Pota)             | Escherichia coli (strain 55989 / EAEC)          |
| 30021  | 4783585 | 4781540 TY-2482_chromosome | B7LAA4                                | Potassium-transporting ATPase B chain (EC 3.6.3.12) (ATP phosphohydrolase [potassium-transporting] B chain) (Pota)             | Escherichia coli (strain 55989 / EAEC)          |
| 30017  | 4785281 | 4783611 TY-2482_chromosome | B7LAA5                                | Potassium-transporting ATPase A chain (EC 3.6.3.12) (ATP phosphohydrolase [potassium-transporting] A chain) (Pota)             | Escherichia coli (strain 55989 / EAEC)          |
| 28283  | 4785484 | 4785284 TY-2482_chromosome | B7MFW4                                | Potassium ion accessory transporter subunit                                                                                    | Escherichia coli O45:K1 (strain S88 / ExPEC)    |
| 95416  | 4785683 | 4785886 TY-2482_chromosome | B7LAA6                                | Putative uncharacterized protein ybfA                                                                                          | Escherichia coli (strain 55989 / EAEC)          |
| 88402  | 4786132 | 4790322 TY-2482_chromosome | B7LAA7                                | RhsC element core protein RshC                                                                                                 | Escherichia coli (strain 55989 / EAEC)          |
| 83260  | 4790325 | 4790648 TY-2482_chromosome | B7LAA8                                | Putative uncharacterized protein ybfB                                                                                          | Escherichia coli (strain 55989 / EAEC)          |
| 104707 | 4790769 | 4792199 TY-2482_chromosome | B7LAA9                                | Putative uncharacterized protein ybfO                                                                                          | Escherichia coli (strain 55989 / EAEC)          |
| 77335  | 4792199 | 4792765 TY-2482_chromosome | B7LAB0                                | Putative uncharacterized protein ybfC                                                                                          | Escherichia coli (strain 55989 / EAEC)          |
| 6227   | 4792994 | 4793245 TY-2482_chromosome | Q2EEQ8                                | Putative defective transposase ybfQ                                                                                            | Escherichia coli (strain K12)                   |
| 105190 | 4793374 | 4794288 TY-2482_chromosome | C8UJN2                                | Putative H repeat-associated protein                                                                                           | Escherichia coli O111:H- (strain 11128 / EHEC)  |
| 68712  | 4794283 | 4794789 TY-2482_chromosome | B7LAB3                                | Putative uncharacterized protein ybgA                                                                                          | Escherichia coli (strain 55989 / EAEC)          |
| 65033  | 4794789 | 4796204 TY-2482_chromosome | B7LAB4                                | Deoxyribodipyrimidine photolyase, FAD-binding (EC 4.1.99.3)                                                                    | Escherichia coli (strain 55989 / EAEC)          |
| 114060 | 4797730 | 4796252 TY-2482_chromosome | B7LAB5                                | Dipeptide permease D                                                                                                           | Escherichia coli (strain 55989 / EAEC)          |
| 81002  | 4798001 | 4798741 TY-2482_chromosome | B7LAB6                                | Putative uncharacterized protein ybgI                                                                                          | Escherichia coli (strain 55989 / EAEC)          |
| 84082  | 4799417 | 4800346 TY-2482_chromosome | B7LAB8                                | Putative hydrolase subunit                                                                                                     | Escherichia coli (strain 55989 / EAEC)          |
| 34759  | 4800339 | 4801070 TY-2482_chromosome | B7LAB9                                | UPF0271 protein ybgL                                                                                                           | Escherichia coli (strain 55989 / EAEC)          |
| 30765  | 4801109 | 4801897 TY-2482_chromosome | B7LAC0                                | Endonuclease 8 (DNA glycosylase/AP lyase Nei) (EC 3.2.2.-) (EC 4.2.99.18) (DNA-(apurinic or apyrimidinic site) lyase N)        | Escherichia coli (strain 55989 / EAEC)          |
| 75195  | 4802943 | 4801900 TY-2482_chromosome | B7LAC1                                | Putative membrane protein                                                                                                      | Escherichia coli (strain 55989 / EAEC)          |
| 112359 | 4803778 | 4803098 TY-2482_chromosome | C8UK15                                | Predicted fimbrial-like adhesin protein                                                                                        | Escherichia coli O111:H- (strain 11128 / EHEC)  |
| 14368  | 4804477 | 4803783 TY-2482_chromosome | E1U309                                | Transposase InsAB'                                                                                                             | Escherichia coli                                |
| 77418  | 4804805 | 4804509 TY-2482_chromosome | B7LAC4                                | Putative uncharacterized protein ybgQ                                                                                          | Escherichia coli (strain 55989 / EAEC)          |
| 102909 | 4805380 | 4804817 TY-2482_chromosome | B7LAC5                                | Putative fimbrial-like adhesin protein                                                                                         | Escherichia coli (strain 55989 / EAEC)          |
| 17042  | 4807035 | 4807223 TY-2482_chromosome | D6HU93                                | Citrate synthase                                                                                                               | Escherichia coli B088                           |
| 84588  | 4807053 | 4805773 TY-2482_chromosome | B7LAC6                                | Citrate synthase (EC 2.3.3.1)                                                                                                  | Escherichia coli (strain 55989 / EAEC)          |
| 14234  | 4807729 | 4807493 TY-2482_chromosome | D6J831                                | Putative uncharacterized protein                                                                                               | Escherichia coli B354                           |
| 79944  | 4807747 | 4808148 TY-2482_chromosome | B5YQQ9                                | Succinate dehydrogenase, cytochrome b556 subunit                                                                               | Escherichia coli O157:H7 (strain EC4115 / EHEC) |
| 80957  | 4808145 | 4808489 TY-2482_chromosome | B7LAC9                                | Succinate dehydrogenase, membrane subunit, binds cytochrome b556                                                               | Escherichia coli (strain 55989 / EAEC)          |
| 94861  | 4808492 | 4810255 TY-2482_chromosome | B7LAD0                                | Succinate dehydrogenase, flavoprotein subunit (EC 1.3.99.1)                                                                    | Escherichia coli (strain 55989 / EAEC)          |
| 88412  | 4810274 | 4810987 TY-2482_chromosome | B7LAD1                                | Succinate dehydrogenase, FeS subunit (EC 1.3.99.1)                                                                             | Escherichia coli (strain 55989 / EAEC)          |
| 70019  | 4811191 | 4813989 TY-2482_chromosome | B7LAD2                                | 2-oxoglutarate decarboxylase, thiamin-requiring (EC 1.2.4.2)                                                                   | Escherichia coli (strain 55989 / EAEC)          |
| 90955  | 4814007 | 4815221 TY-2482_chromosome | B7LAD3                                | Dihydrolypolyltranssuccinase (EC 2.3.1.61)                                                                                     | Escherichia coli (strain 55989 / EAEC)          |
| 34050  | 4815318 | 4816481 TY-2482_chromosome | B7LAD4                                | Succinyl-CoA ligase [ADP-forming] subunit beta (EC 6.2.1.5) (Succinyl-CoA synthetase subunit beta) (SCS-beta)                  | Escherichia coli (strain 55989 / EAEC)          |
| 114064 | 4816484 | 4817350 TY-2482_chromosome | B7LAD5                                | Succinyl-CoA ligase [ADP-forming] subunit alpha (EC 6.2.1.5)                                                                   | Escherichia coli (strain 55989 / EAEC)          |
| 59144  | 4818179 | 4817460 TY-2482_chromosome | B7LAD6                                | DNA-binding transcriptional dual regulator, fatty-acyl-binding                                                                 | Escherichia coli (strain 55989 / EAEC)          |
| 61798  | 4818288 | 4820261 TY-2482_chromosome | B7LAD7                                | Fused 2-O-alpha-mannosyl-D-glycerate specific PTS enzymes: IIA component ; IIB component ; IIC component (EC 2.7.1.69)         | Escherichia coli (strain 55989 / EAEC)          |
| 64300  | 4820282 | 4822912 TY-2482_chromosome | B7LAD8                                | Alpha-mannosidase                                                                                                              | Escherichia coli (strain 55989 / EAEC)          |
| 101386 | 4822940 | 4823164 TY-2482_chromosome | B7LAD9                                | Putative uncharacterized protein                                                                                               | Escherichia coli (strain 55989 / EAEC)          |

|        |         |                            |               |                                                                                                               |                                                    |
|--------|---------|----------------------------|---------------|---------------------------------------------------------------------------------------------------------------|----------------------------------------------------|
| 68612  | 4823762 | 4825327 TY-2482_chromosome | B7LAE0        | Cytochrome d terminal oxidase, subunit I (EC 1.9.3.-)                                                         | Escherichia coli (strain 55989 / EAEC)             |
| 110406 | 4825346 | 4826482 TY-2482_chromosome | B7LAE1        | Cytochrome d terminal oxidase, subunit II (EC 1.9.3.-)                                                        | Escherichia coli (strain 55989 / EAEC)             |
| 62778  | 4826613 | 4826903 TY-2482_chromosome | B7LAE2        | Putative uncharacterized protein ybgE                                                                         | Escherichia coli (strain 55989 / EAEC)             |
| 91135  | 4827056 | 4827457 TY-2482_chromosome | B7LAE3        | Acyl-CoA thioesterase                                                                                         | Escherichia coli (strain 55989 / EAEC)             |
| 113337 | 4827457 | 4828146 TY-2482_chromosome | B7LAE4        | Membrane spanning protein in TolA-TolQ-TolR comple                                                            | Escherichia coli (strain 55989 / EAEC)             |
| 84590  | 4828153 | 4828578 TY-2482_chromosome | B7LAE5        | Membrane spanning protein in TolA-TolQ-TolR comple                                                            | Escherichia coli (strain 55989 / EAEC)             |
| 61691  | 4828646 | 4829908 TY-2482_chromosome | B7LAE6        | Membrane anchored protein in TolA-TolQ-TolR comple                                                            | Escherichia coli (strain 55989 / EAEC)             |
| 34286  | 4830044 | 4831333 TY-2482_chromosome | B7LAE7        | Protein tolB                                                                                                  | Escherichia coli (strain 55989 / EAEC)             |
| 59146  | 4831902 | 4832690 TY-2482_chromosome | B7LAE9        | Putative RNA binding protein                                                                                  | Escherichia coli (strain 55989 / EAEC)             |
| 24199  | 4831922 | 4831308 TY-2482_chromosome | Q1REI4        | Putative uncharacterized protein                                                                              | Escherichia coli (strain UT189 / UPEC)             |
| r357   | 4832858 | 4832933 TY-2482_chromosome | ref NC_010473 | :2611040-2611115 Lys tRNA   [gene=lysV] [locus_tag=ECDH10B_2568                                               |                                                    |
| r368   | 4832969 | 4833044 TY-2482_chromosome | ref NC_010473 | :2610960-2611035 Val tRNA   [gene=valY] [locus_tag=ECDH10B_2567                                               |                                                    |
| r358   | 4833048 | 4833123 TY-2482_chromosome | ref NC_010473 | :2611040-2611115 Lys tRNA   [gene=lysV] [locus_tag=ECDH10B_2568                                               |                                                    |
| r369   | 4833273 | 4833348 TY-2482_chromosome | ref NC_010473 | :2610960-2611035 Val tRNA   [gene=valY] [locus_tag=ECDH10B_2567                                               |                                                    |
| r359   | 4833353 | 4833428 TY-2482_chromosome | ref NC_010473 | :2611040-2611115 Lys tRNA   [gene=lysV] [locus_tag=ECDH10B_2568                                               |                                                    |
| r360   | 4833575 | 4833650 TY-2482_chromosome | ref NC_010473 | :2611040-2611115 Lys tRNA   [gene=lysV] [locus_tag=ECDH10B_2568                                               |                                                    |
| r361   | 4833684 | 4833759 TY-2482_chromosome | ref NC_010473 | :2611040-2611115 Lys tRNA   [gene=lysV] [locus_tag=ECDH10B_2568                                               |                                                    |
| r362   | 4833793 | 4833868 TY-2482_chromosome | ref NC_010473 | :2611040-2611115 Lys tRNA   [gene=lysV] [locus_tag=ECDH10B_2568                                               |                                                    |
| 32583  | 4834117 | 4835157 TY-2482_chromosome | B7LAF1        | Quinolinate synthase A (EC 2.5.1.72)                                                                          | Escherichia coli (strain 55989 / EAEC)             |
| 62779  | 4835198 | 4835914 TY-2482_chromosome | B7LAF2        | Nicotinamide mononucleotide transporter                                                                       | Escherichia coli (strain 55989 / EAEC)             |
| 112171 | 4836855 | 4835917 TY-2482_chromosome | B7LAF3        | Zinc transporter zitB                                                                                         | Escherichia coli (strain 55989 / EAEC)             |
| 71363  | 4837349 | 4836972 TY-2482_chromosome | B7LAF4        | Putative uncharacterized protein ybg5                                                                         | Escherichia coli (strain 55989 / EAEC)             |
| 19551  | 4837662 | 4837438 TY-2482_chromosome | D6J868        | Predicted protein                                                                                             | Escherichia coli B354                              |
| 58501  | 4837665 | 4838714 TY-2482_chromosome | B7LAF5        | Phospho-2-dehydro-3-deoxyheptonate aldolase (EC 2.5.1.54) (3-deoxy-D-arabino-heptulosonate 7-phosphate syntha | Escherichia coli (strain 55989 / EAEC)             |
| 31202  | 4839627 | 4838878 TY-2482_chromosome | B7LAF6        | 2,3-bisphosphoglycerate-dependent phosphoglycerate mutase (BPG-dependent PGAM) (PGAM) (Phosphoglyceromul      | Escherichia coli (strain 55989 / EAEC)             |
| 59150  | 4840872 | 4839835 TY-2482_chromosome | B7LAF7        | Galactose-1-epimerase (Mutarotase) (EC 5.1.3.3)                                                               | Escherichia coli (strain 55989 / EAEC)             |
| 31063  | 4842014 | 4840869 TY-2482_chromosome | B7LAF8        | Galactokinase (EC 2.7.1.6) (Galactose kinase)                                                                 | Escherichia coli (strain 55989 / EAEC)             |
| 79759  | 4843064 | 4842021 TY-2482_chromosome | B7LAF9        | Galactose-1-phosphate uridylyltransferase (EC 2.7.7.12)                                                       | Escherichia coli (strain 55989 / EAEC)             |
| 70049  | 4844090 | 4843077 TY-2482_chromosome | B7LAG0        | UDP-galactose-4-epimerase (EC 5.1.3.2)                                                                        | Escherichia coli (strain 55989 / EAEC)             |
| 60690  | 4845823 | 4844354 TY-2482_chromosome | B7LAG1        | Fused molybdate transporter subunits of ABC superfamily: ATP-binding components                               | Escherichia coli (strain 55989 / EAEC)             |
| 80380  | 4846679 | 4845894 TY-2482_chromosome | B7LAG3        | DNA-binding transcriptional dual regulator                                                                    | Escherichia coli (strain 55989 / EAEC)             |
| 62639  | 4847124 | 4847894 TY-2482_chromosome | B7LB71        | Molybdate transporter subunit ; periplasmic-binding component of ABC superfamily                              | Escherichia coli (strain 55989 / EAEC)             |
| 114080 | 4847897 | 4848583 TY-2482_chromosome | B7LB72        | Molybdate transporter subunit ; membrane component of ABC superfamily                                         | Escherichia coli (strain 55989 / EAEC)             |
| 65534  | 4848589 | 4849644 TY-2482_chromosome | B7LB73        | Molybdate transporter subunit ; ATP-binding component of ABC superfamily (EC 3.6.3.29)                        | Escherichia coli (strain 55989 / EAEC)             |
| 75836  | 4850568 | 4849651 TY-2482_chromosome | B5YRG4        | Phosphatase YbhA (EC 3.1.3.11)                                                                                | Escherichia coli O157:H7 (strain EC4115 / EHEC,    |
| 29620  | 4850621 | 4851613 TY-2482_chromosome | B7LB75        | 6-phosphogluconolactonase (6-P-gluconolactonase) (EC 3.1.1.31)                                                | Escherichia coli (strain 55989 / EAEC)             |
| 102014 | 4852610 | 4851660 TY-2482_chromosome | B5YRG6        | Transcriptional regulator, LysR family                                                                        | Escherichia coli O157:H7 (strain EC4115 / EHEC,    |
| 114678 | 4852794 | 4853843 TY-2482_chromosome | C8TKR7        | Conserved predicted protein                                                                                   | Escherichia coli O26:H11 (strain 11368 / EHEC,     |
| 105675 | 4853922 | 4855352 TY-2482_chromosome | B7LB80        | Putative anion transporter                                                                                    | Escherichia coli (strain 55989 / EAEC)             |
| 99177  | 4855538 | 4857796 TY-2482_chromosome | B7LB81        | Putative enzyme                                                                                               | Escherichia coli (strain 55989 / EAEC)             |
| 86548  | 4859316 | 4858036 TY-2482_chromosome | B7LB82        | Pectin methylesterase                                                                                         | Escherichia coli (strain 55989 / EAEC)             |
| 86868  | 4860521 | 4859454 TY-2482_chromosome | B7LB83        | Integrase from phage                                                                                          | Escherichia coli (strain 55989 / EAEC)             |
| 104617 | 4860717 | 4860502 TY-2482_chromosome | C8TKS2        | Putative excisionase                                                                                          | Escherichia coli O26:H11 (strain 11368 / EHEC,     |
| 103519 | 4861167 | 4861766 TY-2482_chromosome | C6V292        | Putative uncharacterized protein                                                                              | Escherichia coli O157:H7 (strain TW14359 / EHEC    |
| 109515 | 4862201 | 4861983 TY-2482_chromosome | B7LB85        | Putative uncharacterized protein                                                                              | Escherichia coli (strain 55989 / EAEC)             |
| 73751  | 4862611 | 4862303 TY-2482_chromosome | B7LB86        | Putative uncharacterized protein                                                                              | Escherichia coli (strain 55989 / EAEC)             |
| 68291  | 4863615 | 4862938 TY-2482_chromosome | B7LB88        | Exonuclease from phage origin                                                                                 | Escherichia coli (strain 55989 / EAEC)             |
| 102920 | 4864397 | 4863615 TY-2482_chromosome | B7LB89        | Recombination protein bet from phage origin                                                                   | Escherichia coli (strain 55989 / EAEC)             |
| 5783   | 4864774 | 4864406 TY-2482_chromosome | P03702        | Host-nuclease inhibitor protein gam                                                                           | Enterobacteria phage lambda (Bacteriophage lambda) |
| 16835  | 4865194 | 4864778 TY-2482_chromosome | E2QKN0        | Prophage Kil protein                                                                                          | Escherichia coli                                   |
| 25260  | 4866331 | 4865582 TY-2482_chromosome | B7LB92        | Regulatory protein Ci from bacteriophage origin                                                               | Escherichia coli (strain 55989 / EAEC)             |
| 88431  | 4866374 | 4866601 TY-2482_chromosome | B7LB93        | Cro                                                                                                           | Escherichia coli (strain 55989 / EAEC)             |
| 86556  | 4866674 | 4867210 TY-2482_chromosome | B7LB94        | Regulatory protein CII (Modular protein) from bacteriophage origin; putative coiled-coi                       | Escherichia coli (strain 55989 / EAEC)             |
| 81052  | 4867210 | 4868226 TY-2482_chromosome | B7LB95        | Replication protein O frm phage origin                                                                        | Escherichia coli (strain 55989 / EAEC)             |
| 86488  | 4868226 | 4868924 TY-2482_chromosome | B7LB96        | Putative replication protein P of bacteriophage                                                               | Escherichia coli (strain 55989 / EAEC)             |
| 102842 | 4868924 | 4869223 TY-2482_chromosome | B7LB97        | Ren protein from phage origin                                                                                 | Escherichia coli (strain 55989 / EAEC)             |
| 59170  | 4869216 | 4869512 TY-2482_chromosome | B7LB98        | Putative multidrug resistance protein; DLP12 prophage                                                         | Escherichia coli (strain 55989 / EAEC)             |
| 71939  | 4869472 | 4870263 TY-2482_chromosome | B7LB99        | Putative site-specific invertase; DLP12 prophage                                                              | Escherichia coli (strain 55989 / EAEC)             |
| 23859  | 4870378 | 4870698 TY-2482_chromosome | E11VP2        | Conserved domain protein                                                                                      | Escherichia coli IMS 145-7                         |
| 100717 | 4870936 | 4871442 TY-2482_chromosome | B7LBA2        | Putative uncharacterized protein                                                                              | Escherichia coli (strain 55989 / EAEC)             |
| 91934  | 4871640 | 4872092 TY-2482_chromosome | B7LBA3        | Putative uncharacterized protein ybcN                                                                         | Escherichia coli (strain 55989 / EAEC)             |
| 70031  | 4872258 | 4872545 TY-2482_chromosome | B7LBA5        | Putative uncharacterized protein ybcO                                                                         | Escherichia coli (strain 55989 / EAEC)             |
| 106816 | 4872545 | 4872903 TY-2482_chromosome | CGV1R1        | Crossover junction endodeoxyribonuclease rusA (EC 3.1.22.4)                                                   | Escherichia coli O157:H7 (strain TW14359 / EHEC    |
| 95603  | 4873129 | 4873509 TY-2482_chromosome | B7LBA7        | Putative antitermination protein Q homolog; DLP12 prophage                                                    | Escherichia coli (strain 55989 / EAEC)             |

|        |         |                            |        |                                                                                                                 |                                                  |
|--------|---------|----------------------------|--------|-----------------------------------------------------------------------------------------------------------------|--------------------------------------------------|
| 77343  | 4874783 | 4873704 TY-2482_chromosome | B7LBA8 | Outer membrane porin; DLP12 prophage                                                                            | Escherichia coli (strain 55989 / EAEC)           |
| 9871   | 4874993 | 4875259 TY-2482_chromosome | D8CF3  | Conserved domain protein                                                                                        | Escherichia coli MS 185-1                        |
| 24756  | 4875327 | 4875584 TY-2482_chromosome | D3QKQ6 | Putative uncharacterized protein essD                                                                           | Escherichia coli O55:H7 (strain CB9615 / EPEC)   |
| 97168  | 4875587 | 4876081 TY-2482_chromosome | B7LBB0 | Lysozyme (EC 3.2.1.17)                                                                                          | Escherichia coli (strain 55989 / EAEC)           |
| 20563  | 4876081 | 4876638 TY-2482_chromosome | D8ACV6 | Bacteriophage lysis protein                                                                                     | Escherichia coli MS 21-1                         |
| 86349  | 4876723 | 4877241 TY-2482_chromosome | B7LBB2 | Putative uncharacterized protein                                                                                | Escherichia coli (strain 55989 / EAEC)           |
| 104489 | 4878019 | 4877597 TY-2482_chromosome | B7LBB3 | Putative uncharacterized protein                                                                                | Escherichia coli (strain 55989 / EAEC)           |
| 12241  | 4878056 | 4878319 TY-2482_chromosome | D7Y1Y3 | Conserved domain protein                                                                                        | Escherichia coli MS 115-1                        |
| 23824  | 4878567 | 4878313 TY-2482_chromosome | D7XQE2 | Conserved domain protein                                                                                        | Escherichia coli MS 84-1                         |
| 62640  | 4878683 | 4879225 TY-2482_chromosome | B7LBB5 | DNA packaging protein; DLP12 prophage                                                                           | Escherichia coli (strain 55989 / EAEC)           |
| 29393  | 4879203 | 4880861 TY-2482_chromosome | B7LBB6 | Terminase large subunit from bacteriophage origin                                                               | Escherichia coli (strain 55989 / EAEC)           |
| 78739  | 4881124 | 4881327 TY-2482_chromosome | B7LBB8 | Head-to-tail joining protein W (GpW) from bacteriophage origin                                                  | Escherichia coli (strain 55989 / EAEC)           |
| 58242  | 4881327 | 4882925 TY-2482_chromosome | B7LBB9 | Portal protein; minor capsid protein                                                                            | Escherichia coli (strain 55989 / EAEC)           |
| 60802  | 4884232 | 4884567 TY-2482_chromosome | B7LBC1 | Head decoration protein from bacteriophage origin                                                               | Escherichia coli (strain 55989 / EAEC)           |
| 95606  | 4884599 | 4885648 TY-2482_chromosome | B7LBC2 | Major head coat protein from bacteriophage origin                                                               | Escherichia coli (strain 55989 / EAEC)           |
| 84593  | 4885654 | 4886085 TY-2482_chromosome | B7LBC3 | DNA packaging protein from bacteriophage origin                                                                 | Escherichia coli (strain 55989 / EAEC)           |
| 95987  | 4886100 | 4886471 TY-2482_chromosome | C8TJG4 | Putative minor capsid protein                                                                                   | Escherichia coli O26:H11 (strain 11368 / EHEC)   |
| 64417  | 4886465 | 4887040 TY-2482_chromosome | B7LBC5 | Minor tail protein Z (GpZ)                                                                                      | Escherichia coli (strain 55989 / EAEC)           |
| 76047  | 4887040 | 4887432 TY-2482_chromosome | B7LBC6 | Minor tail protein U                                                                                            | Escherichia coli (strain 55989 / EAEC)           |
| 112081 | 4887413 | 4888180 TY-2482_chromosome | B7LBC7 | Major tail protein V                                                                                            | Escherichia coli (strain 55989 / EAEC)           |
| 84594  | 4889030 | 4891588 TY-2482_chromosome | B7LBD0 | Minor tail protein H                                                                                            | Escherichia coli (strain 55989 / EAEC)           |
| 111772 | 4891588 | 4891914 TY-2482_chromosome | B7LBD1 | Minor tail protein M                                                                                            | Escherichia coli (strain 55989 / EAEC)           |
| 14543  | 4891917 | 4893361 TY-2482_chromosome | E8HW87 | Tail fiber component K (Fragment)                                                                               | Escherichia coli O157:H- str. H 2687             |
| 94156  | 4893262 | 4893930 TY-2482_chromosome | B7LBD4 | Tail assembly protein I                                                                                         | Escherichia coli (strain 55989 / EAEC)           |
| 28045  | 4893991 | 4895823 TY-2482_chromosome | B7MSE1 | Host specificity protein J from prophage                                                                        | Escherichia coli O81 (strain ED1a)               |
| 100645 | 4895778 | 4897694 TY-2482_chromosome | C8U2R4 | Putative host specificity protein                                                                               | Escherichia coli O103:H2 (strain 12009 / EHEC)   |
| 94528  | 4897738 | 4898364 TY-2482_chromosome | C8TVW5 | Putative outer membrane Lom                                                                                     | Escherichia coli O26:H11 (strain 11368 / EHEC)   |
| 12764  | 4898432 | 4899061 TY-2482_chromosome | E8HC23 | Putative membrane protein of prophage CP-933X                                                                   | Escherichia coli O157:H7 str. G5101              |
| 89847  | 4899437 | 4901695 TY-2482_chromosome | B7LBD7 | Putative tail fiber protein                                                                                     | Escherichia coli (strain 55989 / EAEC)           |
| 86159  | 4901698 | 4902279 TY-2482_chromosome | B7LBD8 | Putative tail fibre chaperone; Qin prophage                                                                     | Escherichia coli (strain 55989 / EAEC)           |
| 87198  | 4903687 | 4902359 TY-2482_chromosome | B7LBD9 | Putative uncharacterized protein                                                                                | Escherichia coli (strain 55989 / EAEC)           |
| 73593  | 4904909 | 4904436 TY-2482_chromosome | B7LC55 | Putative UPF0098 class protein                                                                                  | Escherichia coli (strain 55989 / EAEC)           |
| 105427 | 4906257 | 4904971 TY-2482_chromosome | B7LC56 | 7,8-diaminopelargonic acid synthase, PLP-dependent (EC 2.6.1.62)                                                | Escherichia coli (strain 55989 / EAEC)           |
| 30120  | 4906344 | 4907381 TY-2482_chromosome | B7LC57 | Biotin synthase (EC 2.8.1.6)                                                                                    | Escherichia coli (strain 55989 / EAEC)           |
| 30132  | 4907381 | 4908532 TY-2482_chromosome | B7LC58 | 8-amino-7-oxononanoate synthase (AONS) (EC 2.3.1.47) (7-keto-8-amino-pelargonic acid synthase) (7-KAP synthase) | Escherichia coli (strain 55989 / EAEC)           |
| 112493 | 4908522 | 4909274 TY-2482_chromosome | B7LC59 | Putative methyltransferase, enzyme of biotin synthesis                                                          | Escherichia coli (strain 55989 / EAEC)           |
| 102725 | 4909270 | 4909944 TY-2482_chromosome | B7LC60 | Dethiobiotin synthetase 1 (EC 6.3.3.3) (DTB synthetase 1) (Dethiobiotin synthase 1)                             | Escherichia coli (strain 55989 / EAEC)           |
| 34538  | 4910526 | 4912544 TY-2482_chromosome | B7LC61 | UvrABC system protein B (Protein uvrB) (Excinuclease ABC subunit B)                                             | Escherichia coli (strain 55989 / EAEC)           |
| 79102  | 4913647 | 4912742 TY-2482_chromosome | B7LC62 | Putative transferase with NAD(P)-binding Rossmann-fold domain; UPF0052 family                                   | Escherichia coli (strain 55989 / EAEC)           |
| 32442  | 4914044 | 4915030 TY-2482_chromosome | B7LC63 | Molybdenum cofactor biosynthesis protein A                                                                      | Escherichia coli (strain 55989 / EAEC)           |
| 84423  | 4915055 | 4915564 TY-2482_chromosome | B7LC64 | Molybdopterin biosynthesis protein B                                                                            | Escherichia coli (strain 55989 / EAEC)           |
| 32446  | 4915570 | 4916052 TY-2482_chromosome | B7LC65 | Molybdenum cofactor biosynthesis protein C                                                                      | Escherichia coli (strain 55989 / EAEC)           |
| 61650  | 4916048 | 4916290 TY-2482_chromosome | B7LC66 | Molybdopterin synthase, small subunit                                                                           | Escherichia coli (strain 55989 / EAEC)           |
| 93624  | 4916295 | 4916744 TY-2482_chromosome | B7LC67 | Molybdopterin synthase, large subunit                                                                           | Escherichia coli (strain 55989 / EAEC)           |
| 65073  | 4916884 | 4917585 TY-2482_chromosome | B7LC68 | Putative uncharacterized protein ybhL                                                                           | Escherichia coli (strain 55989 / EAEC)           |
| 95401  | 4917733 | 4918434 TY-2482_chromosome | B7LC69 | Putative integral membrane protein                                                                              | Escherichia coli (strain 55989 / EAEC)           |
| 77537  | 4918507 | 4919217 TY-2482_chromosome | B7LC70 | Putative uncharacterized protein ybhM                                                                           | Escherichia coli (strain 55989 / EAEC)           |
| 77538  | 4920212 | 4919259 TY-2482_chromosome | B7LC71 | Putative uncharacterized protein ybhN                                                                           | Escherichia coli (strain 55989 / EAEC)           |
| 84424  | 4921453 | 4920215 TY-2482_chromosome | B7LC72 | Cardiolipin synthase 2 (EC 2.7.8.-)                                                                             | Escherichia coli (strain 55989 / EAEC)           |
| 108650 | 4922211 | 4921453 TY-2482_chromosome | B7LC73 | Putative metal-dependent hydrolase                                                                              | Escherichia coli (strain 55989 / EAEC)           |
| 93866  | 4922344 | 4922751 TY-2482_chromosome | B7LC74 | Putative uncharacterized protein ybhQ                                                                           | Escherichia coli (strain 55989 / EAEC)           |
| 61320  | 4923822 | 4922719 TY-2482_chromosome | B7LC75 | Putative transporter subunit: permease component of ABC superfamily                                             | Escherichia coli (strain 55989 / EAEC)           |
| 110537 | 4924966 | 4923836 TY-2482_chromosome | B7LC76 | Putative transporter subunit: permease component of ABC superfamily                                             | Escherichia coli (strain 55989 / EAEC)           |
| 75689  | 4926695 | 4924962 TY-2482_chromosome | B7LC77 | Putative transporter fused subunits of ABC superfamily: ATP-binding components                                  | Escherichia coli (strain 55989 / EAEC)           |
| 34763  | 4927686 | 4926691 TY-2482_chromosome | B7LC78 | UPF0194 membrane protein ybhG                                                                                   | Escherichia coli (strain 55989 / EAEC)           |
| 80546  | 4928369 | 4927689 TY-2482_chromosome | D3GZ40 | TetR-family transcriptional regulator                                                                           | Escherichia coli O44:H18 (strain 042 / EAEC)     |
| 95419  | 4928586 | 4929947 TY-2482_chromosome | B7LC80 | RNA helicase                                                                                                    | Escherichia coli (strain 55989 / EAEC)           |
| 98606  | 4930664 | 4930185 TY-2482_chromosome | B7LC81 | Putative uncharacterized protein ybiA                                                                           | Escherichia coli (strain 55989 / EAEC)           |
| 69915  | 4930784 | 4932931 TY-2482_chromosome | B7LC82 | ATP-dependent DNA helicase                                                                                      | Escherichia coli (strain 55989 / EAEC)           |
| 69916  | 4932962 | 4933921 TY-2482_chromosome | B7LC83 | Putative transferase/phosphorylase                                                                              | Escherichia coli (strain 55989 / EAEC)           |
| 66350  | 4934065 | 4935147 TY-2482_chromosome | B7LC84 | Putative hydroxyacid dehydrogenase                                                                              | Escherichia coli (strain 55989 / EAEC)           |
| 66352  | 4935639 | 4935382 TY-2482_chromosome | B7LC85 | Putative uncharacterized protein ybiJ                                                                           | Escherichia coli (strain 55989 / EAEC)           |
| 108528 | 4936259 | 4935885 TY-2482_chromosome | G6V2G3 | Conserved protein                                                                                               | Escherichia coli O157:H7 (strain TW14359 / EHEC) |
| 34769  | 4936921 | 4936247 TY-2482_chromosome | B7LC87 | PKHD-type hydroxylase ybiX (EC 1.14.11.-)                                                                       | Escherichia coli (strain 55989 / EAEC)           |

|        |         |                            |               |                                                                                                                  |                                                 |
|--------|---------|----------------------------|---------------|------------------------------------------------------------------------------------------------------------------|-------------------------------------------------|
| 18934  | 4939207 | 4939452 TY-2482_chromosome | D8EK43        | Conserved domain protein                                                                                         | Escherichia coli MS 107-1                       |
| 71558  | 4939245 | 4936966 TY-2482_chromosome | B7LC88        | Putative TonB-dependent iron outer membrane transporter                                                          | Escherichia coli (strain 55989 / EAEC)          |
| 110540 | 4939914 | 4939513 TY-2482_chromosome | B7LC89        | Putative uncharacterized protein ybiM                                                                            | Escherichia coli (strain 55989 / EAEC)          |
| 33565  | 4940046 | 4940969 TY-2482_chromosome | B7LC90        | Ribosomal RNA large subunit methyltransferase F (EC 2.1.1.181) (23S rRNA mA16L8 methyltransferase) (rRNA adenin  | Escherichia coli (strain 55989 / EAEC)          |
| 91852  | 4943194 | 4940972 TY-2482_chromosome | B7LC91        | Putative membrane protein                                                                                        | Escherichia coli (strain 55989 / EAEC)          |
| 60696  | 4944033 | 4943314 TY-2482_chromosome | B7LC92        | Glutamine transporter subunit ; ATP-binding component of ABC superfamily                                         | Escherichia coli (strain 55989 / EAEC)          |
| 68294  | 4944689 | 4944033 TY-2482_chromosome | B7LC93        | Glutamine transporter subunit ; membrane component of ABC superfamily                                            | Escherichia coli (strain 55989 / EAEC)          |
| 105750 | 4945574 | 4944831 TY-2482_chromosome | B7LC94        | Glutamine transporter subunit ; periplasmic binding component of ABC superfamily                                 | Escherichia coli (strain 55989 / EAEC)          |
| 17903  | 4945692 | 4945504 TY-2482_chromosome | C1HG03        | Putative uncharacterized protein                                                                                 | Escherichia sp. 3_2_53FAA                       |
| 17904  | 4945913 | 4945623 TY-2482_chromosome | E2QH9         | Putative uncharacterized protein                                                                                 | Escherichia coli                                |
| 30665  | 4946481 | 4945981 TY-2482_chromosome | B7LC95        | DNA protection during starvation protein (EC 1.16.-.)                                                            | Escherichia coli (strain 55989 / EAEC)          |
| 64209  | 4947679 | 4946783 TY-2482_chromosome | B5YSA5        | Threonine/homoserine efflux transporter RhtA                                                                     | Escherichia coli O157:H7 (strain EC4115 / EHEC) |
| 62619  | 4948020 | 4948532 TY-2482_chromosome | B7LC97        | Outer membrane protein                                                                                           | Escherichia coli (strain 55989 / EAEC)          |
| 114158 | 4950167 | 4948587 TY-2482_chromosome | B7LC98        | Putative enzyme, UPF0141 family, inner membrane                                                                  | Escherichia coli (strain 55989 / EAEC)          |
| 7828   | 4950241 | 4950507 TY-2482_chromosome | P75786        | Putative uncharacterized protein yilI                                                                            | Escherichia coli (strain K12)                   |
| r201   | 4950610 | 4950522 TY-2482_chromosome | ref NC_010473 | :906103-906191 -  [gene=rybA] [locus_tag=ECDH10B_0885]                                                           |                                                 |
| 115999 | 4950753 | 4951217 TY-2482_chromosome | B7LC99        | DNA-binding transcriptional regulator of mntH                                                                    | Escherichia coli (strain 55989 / EAEC)          |
| 62620  | 4951217 | 4952332 TY-2482_chromosome | B7LCA0        | Putative transporter                                                                                             | Escherichia coli (strain 55989 / EAEC)          |
| 84425  | 4953314 | 4952397 TY-2482_chromosome | B7LCA1        | Putative uncharacterized protein ybiS                                                                            | Escherichia coli (strain 55989 / EAEC)          |
| 106362 | 4953533 | 4955122 TY-2482_chromosome | B7LCA2        | Putative transporter fused subunits of ABC superfamily: ATP-binding components                                   | Escherichia coli (strain 55989 / EAEC)          |
| 115756 | 4955404 | 4956381 TY-2482_chromosome | B7L7F8        | Transposase, IS110 family                                                                                        | Escherichia coli (strain 55989 / EAEC)          |
| 83173  | 4957905 | 4956643 TY-2482_chromosome | B7LCA4        | Putative uncharacterized protein ybiU                                                                            | Escherichia coli (strain 55989 / EAEC)          |
| 97172  | 4958872 | 4958060 TY-2482_chromosome | B7LCA5        | Type II HAD phosphatase                                                                                          | Escherichia coli (strain 55989 / EAEC)          |
| 68816  | 4961450 | 4959021 TY-2482_chromosome | B7LCA6        | Putative glycyl radical cofactor protein                                                                         | Escherichia coli (strain 55989 / EAEC)          |
| 113977 | 4962382 | 4961459 TY-2482_chromosome | B7LCA7        | Putative AdoMet-dependent glycyl radical activating enzyme                                                       | Escherichia coli (strain 55989 / EAEC)          |
| 58202  | 4962486 | 4963145 TY-2482_chromosome | B7LCA8        | Probable fructose-6-phosphate aldolase 1 (EC 4.1.2.-.)                                                           | Escherichia coli (strain 55989 / EAEC)          |
| 69392  | 4963985 | 4963239 TY-2482_chromosome | B7LCA9        | Molybdopterin synthase sulfurylase                                                                               | Escherichia coli (strain 55989 / EAEC)          |
| 73139  | 4965220 | 4963988 TY-2482_chromosome | B7LCB0        | Molybdopterin biosynthesis protein                                                                               | Escherichia coli (strain 55989 / EAEC)          |
| 88507  | 4965424 | 4966386 TY-2482_chromosome | B7LCB1        | Isoaspartyl dipeptidase with L-asparaginase activity (EC 3.5.1.-.)                                               | Escherichia coli (strain 55989 / EAEC)          |
| 77539  | 4966409 | 4968244 TY-2482_chromosome | B7LCB2        | Putative peptide transport fused subunits of ABC superfamily: ATP-binding components                             | Escherichia coli (strain 55989 / EAEC)          |
| 113979 | 4968267 | 4969802 TY-2482_chromosome | B7LCB3        | Putative peptide transporter subunit: periplasmic-binding component of ABC superfamily                           | Escherichia coli (strain 55989 / EAEC)          |
| 93997  | 4969823 | 4970740 TY-2482_chromosome | B7LCB4        | Putative peptide transporter permease subunit: membrane component of ABC superfamily                             | Escherichia coli (strain 55989 / EAEC)          |
| 112486 | 4970746 | 4971654 TY-2482_chromosome | B7LCB5        | Putative peptide transporter permease subunit: membrane component of ABC superfamily                             | Escherichia coli (strain 55989 / EAEC)          |
| 62621  | 4971835 | 4974180 TY-2482_chromosome | B7LCB6        | Putative uncharacterized protein yliE                                                                            | Escherichia coli (strain 55989 / EAEC)          |
| 109514 | 4974191 | 4975516 TY-2482_chromosome | B7LCB7        | Putative diguanylate cyclase                                                                                     | Escherichia coli (strain 55989 / EAEC)          |
| 33438  | 4976891 | 4975569 TY-2482_chromosome | B7LCB8        | Ribosomal protein S12 methylthiotransferase RimO (S12 MTTase) (S12 methylthiotransferase) (EC 2.-.-.-) (Ribosome | Escherichia coli (strain 55989 / EAEC)          |
| 116000 | 4977104 | 4977484 TY-2482_chromosome | B7LCB9        | Biofilm regulator                                                                                                | Escherichia coli (strain 55989 / EAEC)          |
| 83762  | 4977598 | 4978710 TY-2482_chromosome | B7LCC0        | PQQ-dependent aldose sugar dehydrogenase (Asd) (EC 1.1.5.-) (EC 1.1.5.2)                                         | Escherichia coli (strain 55989 / EAEC)          |
| 101201 | 4979336 | 4978713 TY-2482_chromosome | B7LCC1        | Putative glutathione S-transferase                                                                               | Escherichia coli (strain 55989 / EAEC)          |
| 59007  | 4979583 | 4980782 TY-2482_chromosome | B7LCC2        | D-alanyl-D-alanine carboxypeptidase (Penicillin-binding protein 6a) (EC 3.4.16.4                                 | Escherichia coli (strain 55989 / EAEC)          |
| 91853  | 4981590 | 4980835 TY-2482_chromosome | B7LCC3        | DNA-binding transcriptional repressor                                                                            | Escherichia coli (strain 55989 / EAEC)          |
| 99021  | 4982244 | 4981651 TY-2482_chromosome | B7LCC4        | Undecaprenyl pyrophosphate phosphatase                                                                           | Escherichia coli (strain 55989 / EAEC)          |
| 72897  | 4982529 | 4983758 TY-2482_chromosome | B7LCC5        | Multidrug efflux system protein                                                                                  | Escherichia coli (strain 55989 / EAEC)          |
| 102705 | 4984086 | 4983805 TY-2482_chromosome | B7LD36        | Putative uncharacterized protein ybjH                                                                            | Escherichia coli (strain 55989 / EAEC)          |
| 115997 | 4984987 | 4984175 TY-2482_chromosome | B7LD37        | Putative phosphatase (EC 3.1.3.-.)                                                                               | Escherichia coli (strain 55989 / EAEC)          |
| 76549  | 4986195 | 4984990 TY-2482_chromosome | B7LD38        | Putative transporter                                                                                             | Escherichia coli (strain 55989 / EAEC)          |
| 114153 | 4986279 | 4986812 TY-2482_chromosome | B7LD39        | Putative DNA-binding transcriptional regulator                                                                   | Escherichia coli (strain 55989 / EAEC)          |
| r418   | 4986910 | 4986832 TY-2482_chromosome | ref NC_010473 | :941127-941205 -  [gene=rybB] [locus_tag=ECDH10B_0916]                                                           |                                                 |
| 34771  | 4988675 | 4986993 TY-2482_chromosome | B7LD40        | Putative transport protein YbjL                                                                                  | Escherichia coli (strain 55989 / EAEC)          |
| 70097  | 4988945 | 4989319 TY-2482_chromosome | B7LD41        | Putative uncharacterized protein ybjM                                                                            | Escherichia coli (strain 55989 / EAEC)          |
| 94230  | 4989609 | 4989355 TY-2482_chromosome | B7LD42        | Glutaredoxin 1, redox coenzyme for ribonucleotide reductase (RNR1a)                                              | Escherichia coli (strain 55989 / EAEC)          |
| 101282 | 4989769 | 4990053 TY-2482_chromosome | B7LD43        | Putative uncharacterized protein ybjC                                                                            | Escherichia coli (strain 55989 / EAEC)          |
| 88505  | 4990040 | 4990759 TY-2482_chromosome | B7LD44        | Nitroreductase A, NADPH-dependent, FMN-dependent                                                                 | Escherichia coli (strain 55989 / EAEC)          |
| 33429  | 4990823 | 4991722 TY-2482_chromosome | B7LD45        | Ribosomal protein S6 modification protein                                                                        | Escherichia coli (strain 55989 / EAEC)          |
| 95391  | 4991813 | 4992286 TY-2482_chromosome | B7LD46        | Putative uncharacterized protein ybjN                                                                            | Escherichia coli (strain 55989 / EAEC)          |
| 97125  | 4992641 | 4993750 TY-2482_chromosome | B7LD47        | Putrescine transporter subunit: periplasmic-binding component of ABC superfamily                                 | Escherichia coli (strain 55989 / EAEC)          |
| 84541  | 4993848 | 4994978 TY-2482_chromosome | B7LD48        | Putrescine transporter subunit: ATP-binding component of ABC superfamily                                         | Escherichia coli (strain 55989 / EAEC)          |
| 111197 | 4994991 | 4995941 TY-2482_chromosome | C8UL80        | Putrescine transporter subunit Poth                                                                              | Escherichia coli O111:H- (strain 11128 / EHEC)  |
| 77532  | 4995941 | 4996783 TY-2482_chromosome | B7LD50        | Putrescine transporter subunit: membrane component of ABC superfamily                                            | Escherichia coli (strain 55989 / EAEC)          |
| 84405  | 4996846 | 4997331 TY-2482_chromosome | B7LD51        | Putative uncharacterized protein ybjO                                                                            | Escherichia coli (strain 55989 / EAEC)          |
| 33829  | 4997375 | 4998499 TY-2482_chromosome | B7LD52        | 23S rRNA (uracil-5-)-methyltransferase RumB (EC 2.1.1.189) (23S rRNA(M-5-U747)-methyltransferase                 | Escherichia coli (strain 55989 / EAEC)          |
| 100765 | 4999408 | 4998680 TY-2482_chromosome | B7LD53        | Arginine transporter subunit ; periplasmic-binding component of ABC superfamily                                  | Escherichia coli (strain 55989 / EAEC)          |
| 71411  | 5000368 | 4999703 TY-2482_chromosome | B7LD54        | Arginine transporter subunit ; membrane component of ABC superfamily                                             | Escherichia coli (strain 55989 / EAEC)          |
| 84406  | 5001084 | 5000371 TY-2482_chromosome | B7LD55        | Arginine transporter subunit ; membrane component of ABC superfamily                                             | Escherichia coli (strain 55989 / EAEC)          |

|        |         |                            |               |                                                                                                                            |                                                   |
|--------|---------|----------------------------|---------------|----------------------------------------------------------------------------------------------------------------------------|---------------------------------------------------|
| 84408  | 5001822 | 5001094 TY-2482_chromosome | B7LD56        | Arginine transporter subunit ; periplasmic-binding component of ABC superfamily                                            | Escherichia coli (strain 55989 / EAEC)            |
| 102708 | 5002568 | 5001843 TY-2482_chromosome | B7LD57        | Arginine transporter subunit ; ATP-binding component of ABC superfamily                                                    | Escherichia coli (strain 55989 / EAEC)            |
| 77307  | 5003301 | 5002789 TY-2482_chromosome | B7LD58        | Putative uncharacterized protein ybjP                                                                                      | Escherichia coli (strain 55989 / EAEC)            |
| 34777  | 5003427 | 5003747 TY-2482_chromosome | B7LD59        | UPF0145 protein ybjQ                                                                                                       | Escherichia coli (strain 55989 / EAEC)            |
| 110523 | 5003747 | 5004574 TY-2482_chromosome | B7LD60        | Putative cell wall amidase and lipoprotein                                                                                 | Escherichia coli (strain 55989 / EAEC)            |
| 62615  | 5005587 | 5004577 TY-2482_chromosome | B7LD61        | Putative NAD(P)H-binding oxidoreductase with NAD(P)-binding Rossmann-fold domain                                           | Escherichia coli (strain 55989 / EAEC)            |
| 73592  | 5007116 | 5005689 TY-2482_chromosome | B7LD62        | Putative uncharacterized protein ybjT                                                                                      | Escherichia coli (strain 55989 / EAEC)            |
| 108194 | 5008128 | 5007130 TY-2482_chromosome | B7LD63        | L-allo-threonine aldolase, PLP-dependent (EC 4.1.2.5)                                                                      | Escherichia coli (strain 55989 / EAEC)            |
| 115284 | 5009883 | 5008168 TY-2482_chromosome | B7LD64        | Pyruvate dehydrogenase (Pyruvate oxidase), thiamin-dependent, FAD-binding (EC 1.2.2.2)                                     | Escherichia coli (strain 55989 / EAEC)            |
| 100913 | 5010984 | 5010019 TY-2482_chromosome | B7LD65        | HCP oxidoreductase, NADH-dependent                                                                                         | Escherichia coli (strain 55989 / EAEC)            |
| 31328  | 5012648 | 5010999 TY-2482_chromosome | B7LD66        | Hydroxylamine reductase (EC 1.7.-.-) (Hybrid-cluster protein) (HCP)                                                        | Escherichia coli (strain 55989 / EAEC)            |
| 102722 | 5013691 | 5012795 TY-2482_chromosome | B7LD67        | Putative transporter                                                                                                       | Escherichia coli (strain 55989 / EAEC)            |
| 97354  | 5014126 | 5013842 TY-2482_chromosome | CGV2L9        | Putative uncharacterized protein                                                                                           | Escherichia coli O157:H7 (strain TW14359 / EHEC)  |
| 65654  | 5014881 | 5014189 TY-2482_chromosome | B7LD68        | Aquaporin Z                                                                                                                | Escherichia coli (strain 55989 / EAEC)            |
| 99020  | 5015307 | 5016962 TY-2482_chromosome | B7LD69        | Putative uncharacterized protein ybjD                                                                                      | Escherichia coli (strain 55989 / EAEC)            |
| 84412  | 5017954 | 5016965 TY-2482_chromosome | B7LD70        | Putative uncharacterized protein ybjX                                                                                      | Escherichia coli (strain 55989 / EAEC)            |
| 104323 | 5018069 | 5019181 TY-2482_chromosome | B7LD71        | Macrolide transporter subunit, membrane fusion protein (MFP) component                                                     | Escherichia coli (strain 55989 / EAEC)            |
| 95392  | 5019181 | 5021124 TY-2482_chromosome | B7LD72        | Fused macrolide transporter subunits of ABC superfamily: ATP-binding component ; membrane component                        | Escherichia coli (strain 55989 / EAEC)            |
| 27507  | 5021582 | 5021301 TY-2482_chromosome | Q1RE42        | Putative uncharacterized protein                                                                                           | Escherichia coli (strain UT189 / UPEC)            |
| 30337  | 5021747 | 5022064 TY-2482_chromosome | B7LD74        | ATP-dependent Clp protease adapter protein ClpS                                                                            | Escherichia coli (strain 55989 / EAEC)            |
| 84432  | 5022098 | 5024371 TY-2482_chromosome | B7LD75        | ATPase and specificity subunit of ClpA-ClpP ATP-dependent serine protease, chaperone activity                              | Escherichia coli (strain 55989 / EAEC)            |
| 26588  | 5024674 | 5024914 TY-2482_chromosome | C5W2A2        | Ybl54                                                                                                                      | Escherichia coli (strain B / BL21)                |
| 20819  | 5024692 | 5024456 TY-2482_chromosome | D8EA63        | Conserved domain protein                                                                                                   | Escherichia coli MS 119-7                         |
| r203   | 5024805 | 5024718 TY-2482_chromosome | ref NC_010473 | :1152233-1152320 Ser tRNA [gene=serX] [locus_tag=ECDH10B_1104                                                              |                                                   |
| 109504 | 5025277 | 5025062 TY-2482_chromosome | B7LD76        | Translation initiation factor IF-1                                                                                         | Escherichia coli (strain 55989 / EAEC)            |
| 31877  | 5026266 | 5025565 TY-2482_chromosome | B7LD77        | Leucyl/phenylalanyl-tRNA--protein transferase (EC 2.3.2.6) (L/F-transferase) (Leucyltransferase) (Phenylalanyltransferase) | Escherichia coli (strain 55989 / EAEC)            |
| 84414  | 5028029 | 5026311 TY-2482_chromosome | B7LD78        | Fused cysteine transporter subunits of ABC superfamily: membrane component ; ATP-binding component                         | Escherichia coli (strain 55989 / EAEC)            |
| 76056  | 5029796 | 5028033 TY-2482_chromosome | B7LD79        | Fused cysteine transporter subunits of ABC superfamily: membrane component ; ATP-binding component                         | Escherichia coli (strain 55989 / EAEC)            |
| 91773  | 5030884 | 5029922 TY-2482_chromosome | B7LD80        | Thioredoxin reductase (EC 1.8.1.9)                                                                                         | Escherichia coli (strain 55989 / EAEC)            |
| 20900  | 5031429 | 5031993 TY-2482_chromosome | E9VK05        | AsnC family protein                                                                                                        | Escherichia coli H263                             |
| 106948 | 5032058 | 5034307 TY-2482_chromosome | C8U4H0        | DNA-binding membrane protein FtsK                                                                                          | Escherichia coli O103:H2 (strain 12009 / EHEC)    |
| 102187 | 5034287 | 5036005 TY-2482_chromosome | B7LD82        | DNA-binding membrane protein required for chromosome resolution and partitioning                                           | Escherichia coli (strain 55989 / EAEC)            |
| 87336  | 5036160 | 5036771 TY-2482_chromosome | B7LD83        | Outer-membrane lipoprotein carrier protein                                                                                 | Escherichia coli (strain 55989 / EAEC)            |
| 114154 | 5036785 | 5038125 TY-2482_chromosome | B7LD84        | Recombination protein                                                                                                      | Escherichia coli (strain 55989 / EAEC)            |
| 34171  | 5038219 | 5039508 TY-2482_chromosome | B7LD85        | Seryl-tRNA synthetase (EC 6.1.1.11) (Serine--tRNA ligase) (SerRS) (Seryl-tRNA(Ser/Sec) synthetase)                         | Escherichia coli (strain 55989 / EAEC)            |
| 113984 | 5039750 | 5042191 TY-2482_chromosome | B7LD86        | Dimethyl sulfoxide reductase, anaerobic, subunit A (EC 1.8.99.-)                                                           | Escherichia coli (strain 55989 / EAEC)            |
| 27511  | 5043305 | 5042403 TY-2482_chromosome | A7ZJW5        | Putative uncharacterized protein                                                                                           | Escherichia coli O139:H28 (strain E24377A / ETEC) |
| 24823  | 5044508 | 5043726 TY-2482_chromosome | Q1RDV9        | Protein YcaC                                                                                                               | Escherichia coli (strain UT189 / UPEC)            |
| 34780  | 5044663 | 5045808 TY-2482_chromosome | B7LD90        | Uncharacterized MFS-type transporter ycaD                                                                                  | Escherichia coli (strain 55989 / EAEC)            |
| 62705  | 5046021 | 5047496 TY-2482_chromosome | B7LD91        | Putative transporter                                                                                                       | Escherichia coli (strain 55989 / EAEC)            |
| 61468  | 5048408 | 5047503 TY-2482_chromosome | B7LD92        | Putative DNA-binding transcriptional regulator                                                                             | Escherichia coli (strain 55989 / EAEC)            |
| 115659 | 5048508 | 5049095 TY-2482_chromosome | B7LD93        | Putative NAD(P)H oxidoreductase (EC 1.6.99.-)                                                                              | Escherichia coli (strain 55989 / EAEC)            |
| 109818 | 5049920 | 5049183 TY-2482_chromosome | B7LD94        | Pyruvate formate lyase activating enzyme 1 (EC 1.97.1.4)                                                                   | Escherichia coli (strain 55989 / EAEC)            |
| 94407  | 5052394 | 5050115 TY-2482_chromosome | B7LD95        | Pyruvate formate lyase I (EC 2.3.1.54)                                                                                     | Escherichia coli (strain 55989 / EAEC)            |
| 106357 | 5053306 | 5052452 TY-2482_chromosome | B7LD96        | Formate transporter                                                                                                        | Escherichia coli (strain 55989 / EAEC)            |
| 59112  | 5055471 | 5053714 TY-2482_chromosome | B7LD97        | Putative uncharacterized protein ycaO                                                                                      | Escherichia coli (strain 55989 / EAEC)            |
| 106359 | 5055601 | 5056290 TY-2482_chromosome | B7LD98        | Putative uncharacterized protein ycaP                                                                                      | Escherichia coli (strain 55989 / EAEC)            |
| 33927  | 5056492 | 5057577 TY-2482_chromosome | B7LD99        | Phosphoserine aminotransferase (EC 2.6.1.52) (Phosphohydroxythreonine aminotransferase) (PSAT)                             | Escherichia coli (strain 55989 / EAEC)            |
| 29891  | 5057651 | 5058931 TY-2482_chromosome | B7LDA0        | 3-phosphoshikimate 1-carboxyvinyltransferase (EC 2.5.1.19) (5-enolpyruvylshikimate-3-phosphate synthase)                   | Escherichia coli (strain 55989 / EAEC)            |
| 66117  | 5059079 | 5059864 TY-2482_chromosome | B5Y743        | Peptidase, M48B family (EC 3.4.24.-)                                                                                       | Escherichia coli O157:H7 (strain EC4115 / EHEC)   |
| 31732  | 5060040 | 5060720 TY-2482_chromosome | B7LDA2        | Cytidylate kinase (CK) (EC 2.7.4.14) (Cytidine monophosphate kinase) (CMP kinase)                                          | Escherichia coli (strain 55989 / EAEC)            |
| 62617  | 5060834 | 5062504 TY-2482_chromosome | B7LDA3        | 30S ribosomal subunit protein S1                                                                                           | Escherichia coli (strain 55989 / EAEC)            |
| 29034  | 5062984 | 5062679 TY-2482_chromosome | A1A9I9        | Putative uncharacterized protein                                                                                           | Escherichia coli O1:K1 / APEC                     |
| 68040  | 5063158 | 5065419 TY-2482_chromosome | B7LDA5        | Putative uncharacterized protein ycaI                                                                                      | Escherichia coli (strain 55989 / EAEC)            |
| 110524 | 5065459 | 5067204 TY-2482_chromosome | B7LDA6        | Fused lipid transporter subunits of ABC superfamily: membrane component ; ATP-binding component                            | Escherichia coli (strain 55989 / EAEC)            |
| 31982  | 5067204 | 5068187 TY-2482_chromosome | B7LE13        | Tetraacyldisaccharide 4'-kinase (EC 2.7.1.130) (Lipid A 4'-kinase)                                                         | Escherichia coli (strain 55989 / EAEC)            |
| 66338  | 5068227 | 5069456 TY-2482_chromosome | B7LE14        | Putative uncharacterized protein ycaQ                                                                                      | Escherichia coli (strain 55989 / EAEC)            |
| 21153  | 5069690 | 5070530 TY-2482_chromosome | E7H9E7        | 3-deoxy-D-manno-octulosonate cytidyltransferase (EC 2.7.7.38)                                                              | Escherichia coli EPECa14                          |
| 28193  | 5069785 | 5069519 TY-2482_chromosome | A1A9J4        | Putative uncharacterized protein                                                                                           | Escherichia coli O1:K1 / APEC                     |
| 88488  | 5070590 | 5071480 TY-2482_chromosome | B7LE17        | Putative uncharacterized protein ycbJ                                                                                      | Escherichia coli (strain 55989 / EAEC)            |
| 61038  | 5072239 | 5071463 TY-2482_chromosome | B7LE18        | Putative uncharacterized protein ycbC                                                                                      | Escherichia coli (strain 55989 / EAEC)            |
| 64366  | 5072375 | 5073157 TY-2482_chromosome | B7LE20        | Putative AdoMet-dependent methyltransferase                                                                                | Escherichia coli (strain 55989 / EAEC)            |
| 32531  | 5073157 | 5074476 TY-2482_chromosome | B7LE21        | Chromosome partition protein mukF                                                                                          | Escherichia coli (strain 55989 / EAEC)            |
| 108418 | 5074433 | 5075161 TY-2482_chromosome | B5YT57        | Chromosome partition protein mukE                                                                                          | Escherichia coli O157:H7 (strain EC4115 / EHEC)   |

|        |         |                            |               |                                                                                                                 |                                                  |
|--------|---------|----------------------------|---------------|-----------------------------------------------------------------------------------------------------------------|--------------------------------------------------|
| 32525  | 5075164 | 5079621 TY-2482_chromosome | B7LE23        | Chromosome partition protein mukB (Structural maintenance of chromosome-related protein)                        | Escherichia coli (strain 55989 / EAEC)           |
| 114151 | 5079885 | 5081729 TY-2482_chromosome | B7LE24        | Putative exported enzyme                                                                                        | Escherichia coli (strain 55989 / EAEC)           |
| 62845  | 5081913 | 5082458 TY-2482_chromosome | B7LE25        | Putative uncharacterized protein ycbK                                                                           | Escherichia coli (strain 55989 / EAEC)           |
| 86489  | 5082488 | 5083132 TY-2482_chromosome | B7LE26        | Putative metal-binding hydrolase                                                                                | Escherichia coli (strain 55989 / EAEC)           |
| 54167  | 5084357 | 5083380 TY-2482_chromosome | B7L511        | Transposase, IS110 family                                                                                       | Escherichia coli (strain 55989 / EAEC)           |
| 13282  | 5085813 | 5086011 TY-2482_chromosome | E7H9D3        | Putative uncharacterized protein                                                                                | Escherichia coli EPECa14                         |
| 83097  | 5085826 | 5084639 TY-2482_chromosome | B7LE28        | Aspartate aminotransferase, PLP-dependent (EC 2.6.1.1)                                                          | Escherichia coli (strain 55989 / EAEC)           |
| 106348 | 5087099 | 5086014 TY-2482_chromosome | B7LE29        | Outer membrane porin 1a (Ia; b; F)                                                                              | Escherichia coli (strain 55989 / EAEC)           |
| 105311 | 5089101 | 5087704 TY-2482_chromosome | B7LE30        | Asparaginyl-tRNA synthetase (EC 6.1.1.22) (Asparagine--tRNA ligase)                                             | Escherichia coli (strain 55989 / EAEC)           |
| 33022  | 5090472 | 5089273 TY-2482_chromosome | B7LE31        | Nicotinate phosphoribosyltransferase (NAPRTase) (EC 2.4.2.11)                                                   | Escherichia coli (strain 55989 / EAEC)           |
| 87777  | 5090738 | 5093347 TY-2482_chromosome | B7LE32        | Aminopeptidase N (EC 3.4.11.2)                                                                                  | Escherichia coli (strain 55989 / EAEC)           |
| 13921  | 5093564 | 5093334 TY-2482_chromosome | D8ESU4        | Conserved domain protein                                                                                        | Escherichia coli MS 107-1                        |
| 71869  | 5094324 | 5093560 TY-2482_chromosome | B7LE33        | Alkanesulfonate transporter subunit ; ATP-binding component of ABC superfamily                                  | Escherichia coli (strain 55989 / EAEC)           |
| 93930  | 5095112 | 5094324 TY-2482_chromosome | B7LE34        | Alkanesulfonate transporter subunit ; membrane component of ABC superfamily                                     | Escherichia coli (strain 55989 / EAEC)           |
| 34024  | 5096268 | 5095126 TY-2482_chromosome | B7LE35        | Alkanesulfonate monooxygenase (EC 1.14.14.5) (FMNH2-dependent aliphatic sulfonate monooxygenase)                | Escherichia coli (strain 55989 / EAEC)           |
| 113995 | 5097224 | 5096268 TY-2482_chromosome | B7LE36        | Alkanesulfonate transporter subunit ; periplasmic-binding component of ABC superfamily                          | Escherichia coli (strain 55989 / EAEC)           |
| 112384 | 5097792 | 5097220 TY-2482_chromosome | B7LE37        | NAD(P)H-dependent FMN reductase (EC 1.5.1.29)                                                                   | Escherichia coli (strain 55989 / EAEC)           |
| 107985 | 5098139 | 5098687 TY-2482_chromosome | B7LE38        | Putative fimbrial-like adhesin protein                                                                          | Escherichia coli (strain 55989 / EAEC)           |
| 98990  | 5098773 | 5099471 TY-2482_chromosome | B7LE39        | Putative periplasmic pilin chaperone                                                                            | Escherichia coli (strain 55989 / EAEC)           |
| 95379  | 5099499 | 5102096 TY-2482_chromosome | B7LE40        | Putative outer membrane export usher protein                                                                    | Escherichia coli (strain 55989 / EAEC)           |
| 59204  | 5102090 | 5103157 TY-2482_chromosome | B7LE41        | Putative fimbrial-like adhesin protein                                                                          | Escherichia coli (strain 55989 / EAEC)           |
| 66360  | 5103172 | 5103711 TY-2482_chromosome | B7LE42        | Putative fimbrial-like adhesin protein                                                                          | Escherichia coli (strain 55989 / EAEC)           |
| 82590  | 5103722 | 5104234 TY-2482_chromosome | B7LE43        | Putative exported fimbrial-like adhesin protein                                                                 | Escherichia coli (strain 55989 / EAEC)           |
| 91788  | 5104230 | 5104937 TY-2482_chromosome | B7LE44        | Putative periplasmic pilin chaperone                                                                            | Escherichia coli (strain 55989 / EAEC)           |
| 33201  | 5105051 | 5106058 TY-2482_chromosome | B7LE45        | Dihydroorotate dehydrogenase (quinone) (EC 1.3.5.2) (DHODase) (DHODase) (Dihydroorotate oxidase)                | Escherichia coli (strain 55989 / EAEC)           |
| 86830  | 5106235 | 5106774 TY-2482_chromosome | B7LE46        | Putative uncharacterized protein ycbW                                                                           | Escherichia coli (strain 55989 / EAEC)           |
| 64297  | 5107883 | 5106777 TY-2482_chromosome | B7LE47        | Putative 2Fe-2S cluster-containing protein                                                                      | Escherichia coli (strain 55989 / EAEC)           |
| 75438  | 5108127 | 5110232 TY-2482_chromosome | B7LE48        | Ribosomal RNA large subunit methyltransferase L (EC 2.1.1.173) (23S rRNA m2G2445 methyltransferase) (rRNA (guan | Escherichia coli (strain 55989 / EAEC)           |
| 73604  | 5110246 | 5112150 TY-2482_chromosome | B7LE49        | Fused ATP-binding subunits of ABC superfamily protein involved in precise excision of transposon:               | Escherichia coli (strain 55989 / EAEC)           |
| 69892  | 5112283 | 5113533 TY-2482_chromosome | B7LE50        | Paraquat-inducible membrane protein A                                                                           | Escherichia coli (strain 55989 / EAEC)           |
| 90018  | 5113541 | 5115178 TY-2482_chromosome | B7LE51        | Paraquat-inducible protein B                                                                                    | Escherichia coli (strain 55989 / EAEC)           |
| 93507  | 5115178 | 5115738 TY-2482_chromosome | C8ULH5        | Conserved predicted protein                                                                                     | Escherichia coli O111:H- (strain 11128 / EHEC)   |
| 115609 | 5115981 | 5116175 TY-2482_chromosome | CGUNL9        | Ribosome modulation factor                                                                                      | Escherichia coli O157:H7 (strain TW14359 / EHEC) |
| 73608  | 5118581 | 5116824 TY-2482_chromosome | B7LE55        | Putative ATP-dependent protease                                                                                 | Escherichia coli (strain 55989 / EAEC)           |
| 34785  | 5118767 | 5119216 TY-2482_chromosome | B7LE56        | UPF0268 protein ycbG                                                                                            | Escherichia coli (strain 55989 / EAEC)           |
| 84443  | 5120335 | 5119298 TY-2482_chromosome | B7LE57        | Outer membrane protein A (3a; II*; G; d)                                                                        | Escherichia coli (strain 55989 / EAEC)           |
| 82881  | 5120490 | 5120705 TY-2482_chromosome | D3H010        | Putative uncharacterized protein                                                                                | Escherichia coli O44:H18 (strain 042 / EAEC)     |
| 34070  | 5121201 | 5120695 TY-2482_chromosome | B7LE58        | Cell division inhibitor sulA                                                                                    | Escherichia coli (strain 55989 / EAEC)           |
| 104625 | 5121420 | 5122046 TY-2482_chromosome | B7LE59        | Putative uncharacterized protein yccR                                                                           | Escherichia coli (strain 55989 / EAEC)           |
| 106463 | 5124165 | 5122015 TY-2482_chromosome | B7LE60        | Putative uncharacterized protein yccS                                                                           | Escherichia coli (strain 55989 / EAEC)           |
| 82658  | 5124630 | 5124187 TY-2482_chromosome | C8U5C5        | Conserved predicted inner membrane protein                                                                      | Escherichia coli O103:H2 (strain 12009 / EHEC)   |
| 82504  | 5124753 | 5126804 TY-2482_chromosome | B7LE62        | DNA helicase IV (EC 3.6.1.-)                                                                                    | Escherichia coli (strain 55989 / EAEC)           |
| 32379  | 5127297 | 5126842 TY-2482_chromosome | B7LE63        | Methylglyoxal synthase (MGS) (EC 4.2.3.3)                                                                       | Escherichia coli (strain 55989 / EAEC)           |
| 34790  | 5128055 | 5127396 TY-2482_chromosome | B7LE64        | UPF0319 protein yccT                                                                                            | Escherichia coli (strain 55989 / EAEC)           |
| 60532  | 5128228 | 5128638 TY-2482_chromosome | B7LE65        | Putative CoA-binding protein                                                                                    | Escherichia coli (strain 55989 / EAEC)           |
| 29160  | 5128610 | 5129002 TY-2482_chromosome | Q1RDP7        | Putative uncharacterized protein                                                                                | Escherichia coli (strain UT189 / UPEC)           |
| 66361  | 5130133 | 5130621 TY-2482_chromosome | B7LE68        | Acyolphosphatase (EC 3.6.1.7)                                                                                   | Escherichia coli (strain 55989 / EAEC)           |
| 68041  | 5130164 | 5129064 TY-2482_chromosome | B7LE67        | Putative AdoMet-dependent methyltransferase, UPF0064 family                                                     | Escherichia coli (strain 55989 / EAEC)           |
| 84444  | 5130950 | 5130624 TY-2482_chromosome | B7LE69        | Subunit of enzyme for 2-thio modification of mnm5S2U of tRNA anticodon L                                        | Escherichia coli (strain 55989 / EAEC)           |
| 60813  | 5131700 | 5131044 TY-2482_chromosome | B7LE70        | Putative uncharacterized protein yccA                                                                           | Escherichia coli (strain 55989 / EAEC)           |
| r205   | 5131994 | 5131907 TY-2482_chromosome | ref NC_010473 | 1084776-1084863 Ser tRNA [gene=serT] [locus_tag=ECDH10B_1041                                                    |                                                  |
| 113938 | 5132421 | 5133536 TY-2482_chromosome | B7LEU9        | Hydrogenase 1, small subunit (EC 1.12.99.6)                                                                     | Escherichia coli (strain 55989 / EAEC)           |
| 113940 | 5133536 | 5135326 TY-2482_chromosome | B7LEV1        | Hydrogenase 1, large subunit (EC 1.12.99.6)                                                                     | Escherichia coli (strain 55989 / EAEC)           |
| 66220  | 5135348 | 5136052 TY-2482_chromosome | B7LEV2        | Hydrogenase 1, b-type cytochrome subunit                                                                        | Escherichia coli (strain 55989 / EAEC)           |
| 110606 | 5136052 | 5136636 TY-2482_chromosome | B7LEV3        | Protein involved in processing of HyaA and HyaB proteins                                                        | Escherichia coli (strain 55989 / EAEC)           |
| 99078  | 5136636 | 5137031 TY-2482_chromosome | B7LEV4        | Protein involved in processing of HyaA and HyaB proteins                                                        | Escherichia coli (strain 55989 / EAEC)           |
| 59092  | 5137031 | 5137885 TY-2482_chromosome | B7LEV5        | Protein involved in nickel incorporation into hydrogenase-1 protein:                                            | Escherichia coli (strain 55989 / EAEC)           |
| 110607 | 5138022 | 5139563 TY-2482_chromosome | B7LEV6        | Cytochrome bd-II oxidase, subunit I (EC 1.10.3.-)                                                               | Escherichia coli (strain 55989 / EAEC)           |
| 113038 | 5139578 | 5140711 TY-2482_chromosome | B7LEV7        | Cytochrome bd-II oxidase, subunit II (EC 1.10.3.-)                                                              | Escherichia coli (strain 55989 / EAEC)           |
| 94057  | 5140899 | 5142194 TY-2482_chromosome | B7LEV8        | Phosphoanhydride phosphorylase (EC 3.1.3.2) (EC 3.1.3.26)                                                       | Escherichia coli (strain 55989 / EAEC)           |
| 90953  | 5144492 | 5142315 TY-2482_chromosome | B7LEV9        | Cryptic autophosphorylating protein tyrosine kinase Etk (EC 2.7.10.2)                                           | Escherichia coli (strain 55989 / EAEC)           |
| 66378  | 5144958 | 5144515 TY-2482_chromosome | B7LEW0        | Phosphotyrosine-protein phosphatase                                                                             | Escherichia coli (strain 55989 / EAEC)           |
| 73680  | 5146085 | 5144949 TY-2482_chromosome | B7LEW1        | Putative exopolysaccharide export protein                                                                       | Escherichia coli (strain 55989 / EAEC)           |
| 84508  | 5148227 | 5146134 TY-2482_chromosome | B7LEW2        | Putative uncharacterized protein ymcA                                                                           | Escherichia coli (strain 55989 / EAEC)           |

|        |         |                            |                                                                              |                                                                                       |                                                  |
|--------|---------|----------------------------|------------------------------------------------------------------------------|---------------------------------------------------------------------------------------|--------------------------------------------------|
| 112021 | 5148973 | 5148230 TY-2482_chromosome | B7LEW3                                                                       | Putative uncharacterized protein ymcB                                                 | Escherichia coli (strain 55989 / EAEC)           |
| 88281  | 5149614 | 5148973 TY-2482_chromosome | B7LEW4                                                                       | Putative outer membrane lipoprotein                                                   | Escherichia coli (strain 55989 / EAEC)           |
| 100722 | 5150026 | 5149724 TY-2482_chromosome | B7LF95                                                                       | Putative uncharacterized protein ymcD                                                 | Escherichia coli (strain 55989 / EAEC)           |
| 95591  | 5150680 | 5150471 TY-2482_chromosome | B7LF96                                                                       | Stress protein, member of the CspA-family                                             | Escherichia coli (strain 55989 / EAEC)           |
| 61255  | 5150966 | 5151175 TY-2482_chromosome | B7LF99                                                                       | DNA-binding transcriptional regulator                                                 | Escherichia coli (strain 55989 / EAEC)           |
| 21555  | 5151117 | 5151374 TY-2482_chromosome | D6I8Q5                                                                       | Cold shock protein                                                                    | Escherichia coli B185                            |
| 100638 | 5151352 | 5151579 TY-2482_chromosome | C8TPT1                                                                       | Sfa protein                                                                           | Escherichia coli O26:H11 (strain 11368 / EHEC)   |
| 71943  | 5152867 | 5151797 TY-2482_chromosome | B7LFA1                                                                       | Putative 4Fe-4S membrane protein                                                      | Escherichia coli (strain 55989 / EAEC)           |
| 112157 | 5155683 | 5152942 TY-2482_chromosome | B7LFA2                                                                       | Hybrid sensory histidine kinase in two-component regulatory system with TorR          | Escherichia coli (strain 55989 / EAEC)           |
| 95592  | 5155766 | 5156791 TY-2482_chromosome | B7LFA3                                                                       | Periplasmic sensory protein associated with the TorRS two-component regulatory system | Escherichia coli (strain 55989 / EAEC)           |
| 93661  | 5157459 | 5156770 TY-2482_chromosome | B7LFA4                                                                       | DNA-binding response regulator in two-component regulatory system with TorS           | Escherichia coli (strain 55989 / EAEC)           |
| 61463  | 5157589 | 5158758 TY-2482_chromosome | B7LFA5                                                                       | Trimethylamine N-oxide (TMAO) reductase I, cytochrome c-type subunit                  | Escherichia coli (strain 55989 / EAEC)           |
| 79799  | 5158761 | 5161304 TY-2482_chromosome | B7LFA6                                                                       | Trimethylamine N-oxide (TMAO) reductase I, catalytic subunit (EC 1.6.6.9)             | Escherichia coli (strain 55989 / EAEC)           |
| 34301  | 5161304 | 5161900 TY-2482_chromosome | B7LFA7                                                                       | Chaperone protein torD                                                                | Escherichia coli (strain 55989 / EAEC)           |
| 30252  | 5162301 | 5161999 TY-2482_chromosome | B7LFA8                                                                       | Chaperone modulatory protein CbpM                                                     | Escherichia coli (strain 55989 / EAEC)           |
| 30249  | 5163221 | 5162304 TY-2482_chromosome | B7LFA9                                                                       | Curved DNA-binding protein                                                            | Escherichia coli (strain 55989 / EAEC)           |
| 93938  | 5163554 | 5164738 TY-2482_chromosome | B7LFB0                                                                       | Putative uncharacterized protein yccE                                                 | Escherichia coli (strain 55989 / EAEC)           |
| 116012 | 5165030 | 5166268 TY-2482_chromosome | B7LFB1                                                                       | Glucose-1-phosphatase/inositol phosphatase (EC 3.1.3.10)                              | Escherichia coli (strain 55989 / EAEC)           |
| 62763  | 5166536 | 5166312 TY-2482_chromosome | B7LFB2                                                                       | Putative uncharacterized protein yccJ                                                 | Escherichia coli (strain 55989 / EAEC)           |
| 34580  | 5167150 | 5166560 TY-2482_chromosome | B7LFB3                                                                       | Flavoprotein wrbA (Trp repressor-binding protein)                                     | Escherichia coli (strain 55989 / EAEC)           |
| 24980  | 5168466 | 5167135 TY-2482_chromosome | B7MPT9                                                                       | Phage integrase                                                                       | Escherichia coli O81 (strain ED1a)               |
| 104812 | 5168779 | 5168498 TY-2482_chromosome | C8TPU6                                                                       | Excisionase                                                                           | Escherichia coli O26:H11 (strain 11368 / EHEC)   |
| 94121  | 5169076 | 5168828 TY-2482_chromosome | C8TPU7                                                                       | Putative uncharacterized protein                                                      | Escherichia coli O26:H11 (strain 11368 / EHEC)   |
| 105066 | 5169444 | 5169067 TY-2482_chromosome | C8TPU8                                                                       | Putative uncharacterized protein                                                      | Escherichia coli O26:H11 (strain 11368 / EHEC)   |
| 75817  | 5169794 | 5169444 TY-2482_chromosome | C8TPU9                                                                       | Putative uncharacterized protein                                                      | Escherichia coli O26:H11 (strain 11368 / EHEC)   |
| 72342  | 5170042 | 5169833 TY-2482_chromosome | C8U7P4                                                                       | Putative uncharacterized protein                                                      | Escherichia coli O103:H2 (strain 12009 / EHEC)   |
| 81824  | 5170628 | 5170005 TY-2482_chromosome | C6UPU4                                                                       | Adenine methylase                                                                     | Escherichia coli O157:H7 (strain TW14359 / EHEC) |
| 68249  | 5171056 | 5170628 TY-2482_chromosome | C8U7P2                                                                       | Probable regulatory protein                                                           | Escherichia coli O103:H2 (strain 12009 / EHEC)   |
| 84994  | 5171750 | 5171115 TY-2482_chromosome | C8U7P1                                                                       | Probable antirepressor                                                                | Escherichia coli O103:H2 (strain 12009 / EHEC)   |
| 11545  | 5171752 | 5172138 TY-2482_chromosome | E1J6T9                                                                       | Putative uncharacterized protein                                                      | Escherichia coli MS 124-1                        |
| 71346  | 5173002 | 5172109 TY-2482_chromosome | C8TPV1                                                                       | Putative uncharacterized protein                                                      | Escherichia coli O26:H11 (strain 11368 / EHEC)   |
| 25386  | 5173238 | 5173008 TY-2482_chromosome | B7MXC9                                                                       | Putative uncharacterized protein                                                      | Escherichia coli O81 (strain ED1a)               |
| 92887  | 5173605 | 5173201 TY-2482_chromosome | C8TPV5                                                                       | Putative uncharacterized protein                                                      | Escherichia coli O26:H11 (strain 11368 / EHEC)   |
| 107384 | 5174135 | 5173605 TY-2482_chromosome | C8TPV6                                                                       | Putative uncharacterized protein                                                      | Escherichia coli O26:H11 (strain 11368 / EHEC)   |
| 82307  | 5174873 | 5174433 TY-2482_chromosome | C8U7N0                                                                       | Putative uncharacterized protein                                                      | Escherichia coli O103:H2 (strain 12009 / EHEC)   |
| 108764 | 5175771 | 5174953 TY-2482_chromosome | C8U7M9                                                                       | Putative uncharacterized protein                                                      | Escherichia coli O103:H2 (strain 12009 / EHEC)   |
| 108168 | 5176182 | 5175838 TY-2482_chromosome | C8U7M8                                                                       | Putative uncharacterized protein                                                      | Escherichia coli O103:H2 (strain 12009 / EHEC)   |
| 93557  | 5176844 | 5176260 TY-2482_chromosome | C8U7M7                                                                       | Putative uncharacterized protein                                                      | Escherichia coli O103:H2 (strain 12009 / EHEC)   |
| 72117  | 5177533 | 5176847 TY-2482_chromosome | C8U7M6                                                                       | Putative exonuclease                                                                  | Escherichia coli O103:H2 (strain 12009 / EHEC)   |
| 69096  | 5178480 | 5177533 TY-2482_chromosome | C8U7M5                                                                       | Predicted DNA recombination protein Bet                                               | Escherichia coli O103:H2 (strain 12009 / EHEC)   |
| 107846 | 5178778 | 5178500 TY-2482_chromosome | C8U7M4                                                                       | Putative uncharacterized protein                                                      | Escherichia coli O103:H2 (strain 12009 / EHEC)   |
| 70440  | 5179080 | 5178802 TY-2482_chromosome | C8U7M3                                                                       | Putative uncharacterized protein                                                      | Escherichia coli O103:H2 (strain 12009 / EHEC)   |
| 67094  | 5179304 | 5179095 TY-2482_chromosome | C8U7M2                                                                       | Putative host killing protein                                                         | Escherichia coli O103:H2 (strain 12009 / EHEC)   |
| 8210   | 5180049 | 5179378 TY-2482_chromosome | E7DYP2                                                                       | Putative uncharacterized protein                                                      | Enterobacteria phage VT2phi_272                  |
| 14195  | 5180205 | 5180396 TY-2482_chromosome | B3AW45                                                                       | Putative uncharacterized protein                                                      | Escherichia coli O157:H7 str. EC4486             |
| 9389   | 5181078 | 5180308 TY-2482_chromosome | B6ZXE1                                                                       | Phage regulatory protein, Rha family                                                  | Escherichia coli O157:H7 str. TW14588            |
| 24477  | 5182660 | 5181710 TY-2482_chromosome | Q32F72                                                                       | Type II site-specific deoxyribonuclease                                               | Shigella dysenteriae serotype 1 (strain Sd197)   |
| 25819  | 5184126 | 5182660 TY-2482_chromosome | Q32F73                                                                       | Site-specific DNA-methyltransferase                                                   | Shigella dysenteriae serotype 1 (strain Sd197)   |
| 24189  | 5184934 | 5184224 TY-2482_chromosome | Q32F74                                                                       | Repressor protein Ci                                                                  | Shigella dysenteriae serotype 1 (strain Sd197)   |
| 8203   | 5185030 | 5185230 TY-2482_chromosome | E7DYP8                                                                       | Cro antirepressor                                                                     | Enterobacteria phage VT2phi_272                  |
| 112477 | 5185264 | 5185554 TY-2482_chromosome | C8U7L4                                                                       | Putative uncharacterized protein                                                      | Escherichia coli O103:H2 (strain 12009 / EHEC)   |
| 97437  | 5185765 | 5186139 TY-2482_chromosome | C8U7L3                                                                       | Putative uncharacterized protein                                                      | Escherichia coli O103:H2 (strain 12009 / EHEC)   |
| 63386  | 5186136 | 5187653 TY-2482_chromosome | C8U7L2                                                                       | Predicted helicase                                                                    | Escherichia coli O103:H2 (strain 12009 / EHEC)   |
| 79355  | 5187646 | 5188614 TY-2482_chromosome | C8U7L1                                                                       | Predicted DNA primase                                                                 | Escherichia coli O103:H2 (strain 12009 / EHEC)   |
| 67184  | 5188617 | 5189063 TY-2482_chromosome | C8U7L0                                                                       | Putative uncharacterized protein                                                      | Escherichia coli O103:H2 (strain 12009 / EHEC)   |
| 79511  | 5189074 | 5189634 TY-2482_chromosome | C8U7K9                                                                       | Putative uncharacterized protein                                                      | Escherichia coli O103:H2 (strain 12009 / EHEC)   |
| 3587   | 5189634 | 5189825 TY-2482_chromosome | O48428                                                                       | Protein ninH                                                                          | Enterobacteria phage H19B (Bacteriophage H19B)   |
| 107087 | 5189821 | 5190252 TY-2482_chromosome | C8U7K8                                                                       | Putative late gene regulator Q                                                        | Escherichia coli O103:H2 (strain 12009 / EHEC)   |
| r353   | 5190697 | 5190772 TY-2482_chromosome | ref NC_010473 :2875549-2875624 Ile tRNA [gene=ileY] [locus_tag=ECDH10B_2820] |                                                                                       |                                                  |
| 45329  | 5190956 | 5191995 TY-2482_chromosome | B3BQ93                                                                       | Shiga toxin subunit A (EC 3.2.2.22)                                                   | Escherichia coli O157:H7 str. EC869              |
| 112258 | 5192010 | 5192276 TY-2482_chromosome | C6UP08                                                                       | Shiga toxin II subunit B                                                              | Escherichia coli O157:H7 (strain TW14359 / EHEC) |
| 29255  | 5192732 | 5194699 TY-2482_chromosome | B7MRX3                                                                       | Putative uncharacterized protein                                                      | Escherichia coli O81 (strain ED1a)               |
| 92049  | 5194885 | 5195301 TY-2482_chromosome | C6V1Q5                                                                       | Putative uncharacterized protein                                                      | Escherichia coli O157:H7 (strain TW14359 / EHEC) |
| 11417  | 5195382 | 5196132 TY-2482_chromosome | B6ZXG1                                                                       | Lysozyme (EC 3.2.1.17)                                                                | Escherichia coli O157:H7 str. TW14588            |



|        |         |                            |        |                                                                                                                           |                                                   |
|--------|---------|----------------------------|--------|---------------------------------------------------------------------------------------------------------------------------|---------------------------------------------------|
| 115832 | 5196409 | 5196975 TY-2482_chromosome | C6UP04 | Putative antirepressor protein Ant                                                                                        | Escherichia coli O157:H7 (strain TW14359 / EHEC   |
| 20564  | 5197139 | 5197753 TY-2482_chromosome | D8ACV6 | Bacteriophage lysis protein                                                                                               | Escherichia coli MS 21-1                          |
| 98132  | 5197770 | 5198318 TY-2482_chromosome | C8U7J7 | Putative uncharacterized protein                                                                                          | Escherichia coli O103:H2 (strain 12009 / EHEC)    |
| 114926 | 5198340 | 5198555 TY-2482_chromosome | C8UMI7 | Conserved predicted protein                                                                                               | Escherichia coli O111:H- (strain 11128 / EHEC)    |
| 74717  | 5198614 | 5199417 TY-2482_chromosome | C8UMI8 | Putative small subunit terminase                                                                                          | Escherichia coli O111:H- (strain 11128 / EHEC)    |
| 115152 | 5199401 | 5201104 TY-2482_chromosome | C8UMI9 | Putative terminase large subunit                                                                                          | Escherichia coli O111:H- (strain 11128 / EHEC)    |
| 113734 | 5201107 | 5203248 TY-2482_chromosome | B5YYP6 | Putative uncharacterized protein                                                                                          | Escherichia coli O157:H7 (strain EC4115 / EHEC)   |
| 115696 | 5203409 | 5204413 TY-2482_chromosome | C8UMJ1 | Putative uncharacterized protein                                                                                          | Escherichia coli O111:H- (strain 11128 / EHEC)    |
| 111067 | 5204440 | 5205651 TY-2482_chromosome | C8U7J2 | Putative uncharacterized protein                                                                                          | Escherichia coli O103:H2 (strain 12009 / EHEC)    |
| 107336 | 5205710 | 5206096 TY-2482_chromosome | C8UMJ3 | Putative uncharacterized protein                                                                                          | Escherichia coli O111:H- (strain 11128 / EHEC)    |
| 114404 | 5206149 | 5206607 TY-2482_chromosome | C8UMJ4 | Putative uncharacterized protein                                                                                          | Escherichia coli O111:H- (strain 11128 / EHEC)    |
| 95298  | 5206594 | 5207154 TY-2482_chromosome | B5YYN8 | Putative uncharacterized protein                                                                                          | Escherichia coli O157:H7 (strain EC4115 / EHEC)   |
| 96207  | 5207157 | 5207804 TY-2482_chromosome | C8U7I8 | Putative uncharacterized protein                                                                                          | Escherichia coli O103:H2 (strain 12009 / EHEC)    |
| 104816 | 5207804 | 5209993 TY-2482_chromosome | C8U7I7 | Predicted tail fiber protein                                                                                              | Escherichia coli O103:H2 (strain 12009 / EHEC)    |
| 111000 | 5210763 | 5212451 TY-2482_chromosome | C6UNY7 | Putative uncharacterized protein                                                                                          | Escherichia coli O157:H7 (strain TW14359 / EHEC)  |
| 96491  | 5212451 | 5213716 TY-2482_chromosome | C8UMK2 | Predicted tail tip fiber protein                                                                                          | Escherichia coli O111:H- (strain 11128 / EHEC)    |
| 61137  | 5213734 | 5214009 TY-2482_chromosome | C8UMK3 | Predicted outer membrane protein                                                                                          | Escherichia coli O111:H- (strain 11128 / EHEC)    |
| 97449  | 5214018 | 5214632 TY-2482_chromosome | C6UNY5 | Putative uncharacterized protein                                                                                          | Escherichia coli O157:H7 (strain TW14359 / EHEC)  |
| 96493  | 5214726 | 5215457 TY-2482_chromosome | C8UMK5 | Putative outer membrane protein Lom                                                                                       | Escherichia coli O111:H- (strain 11128 / EHEC)    |
| 63484  | 5215890 | 5216288 TY-2482_chromosome | C6UNY3 | Putative uncharacterized protein                                                                                          | Escherichia coli O157:H7 (strain TW14359 / EHEC)  |
| 75856  | 5216385 | 5217038 TY-2482_chromosome | C8UMK7 | Putative uncharacterized protein                                                                                          | Escherichia coli O111:H- (strain 11128 / EHEC)    |
| 71004  | 5217044 | 5217487 TY-2482_chromosome | C8UMK8 | Putative uncharacterized protein                                                                                          | Escherichia coli O111:H- (strain 11128 / EHEC)    |
| 114330 | 5217500 | 5217748 TY-2482_chromosome | C8U7H6 | Putative uncharacterized protein                                                                                          | Escherichia coli O103:H2 (strain 12009 / EHEC)    |
| 108405 | 5217762 | 5219024 TY-2482_chromosome | C8UML0 | Putative uncharacterized protein                                                                                          | Escherichia coli O111:H- (strain 11128 / EHEC)    |
| 114927 | 5219097 | 5227475 TY-2482_chromosome | C8UML1 | Putative uncharacterized protein                                                                                          | Escherichia coli O111:H- (strain 11128 / EHEC)    |
| 114653 | 5227816 | 5228184 TY-2482_chromosome | C8TNB3 | Putative uncharacterized protein                                                                                          | Escherichia coli O26:H11 (strain 11368 / EHEC)    |
| 110399 | 5228391 | 5228618 TY-2482_chromosome | B7LFB4 | Putative uncharacterized protein                                                                                          | Escherichia coli (strain 55989 / EAEC)            |
| 91004  | 5230138 | 5228813 TY-2482_chromosome | B7LFB6 | Pyrimidine transporter                                                                                                    | Escherichia coli (strain 55989 / EAEC)            |
| 4944   | 5230734 | 5230162 TY-2482_chromosome | A1A9R2 | NAD(P)H-flavin reductase RutF (EC 1.5.1.29) (FMN reductase) (NAD(P)H:flavin oxidoreductase)                               | Escherichia coli O1:K1 / APEC                     |
| 33859  | 5231254 | 5230667 TY-2482_chromosome | B7LFB8 | Probable malonic semialdehyde reductase RutE (EC 1.1.1.298)                                                               | Escherichia coli (strain 55989 / EAEC)            |
| 33856  | 5232064 | 5231267 TY-2482_chromosome | B7LFB9 | Putative aminoacylate hydrolase RutD (EC 3.5.1.-) (Aminohydrolase)                                                        | Escherichia coli (strain 55989 / EAEC)            |
| 17218  | 5232486 | 5232075 TY-2482_chromosome | E1J245 | Pyrimidine utilization protein                                                                                            | Escherichia coli MS 124-1                         |
| 4940   | 5233204 | 5232473 TY-2482_chromosome | D3QP4K | Peroxyureidoacylate/ureidoacylate amidohydrolase RutB (EC 3.5.1.n4) (Ureidoacylate amidohydrolase)                        | Escherichia coli O55:H7 (strain CB9615 / EPEC)    |
| 33837  | 5234310 | 5233165 TY-2482_chromosome | B7LFC2 | Pyrimidine monoxygenase RutA (EC 1.14.14.n1)                                                                              | Escherichia coli (strain 55989 / EAEC)            |
| 91965  | 5234541 | 5235176 TY-2482_chromosome | B7LFC3 | DNA-binding transcriptional regulator of the alternative pyrimidine degradation pathway                                   | Escherichia coli (strain 55989 / EAEC)            |
| 88451  | 5239181 | 5235222 TY-2482_chromosome | B7LFC4 | Fused DNA-binding transcriptional regulator ; proline dehydrogenase ; pyrroline-5-carboxylate dehydrogenase (EC 1.1.1.11) | Escherichia coli (strain 55989 / EAEC)            |
| 9440   | 5239236 | 5239442 TY-2482_chromosome | D6IM82 | Predicted protein                                                                                                         | Escherichia coli FVEEC1412                        |
| 77483  | 5239604 | 5241109 TY-2482_chromosome | B7LFC5 | Proline:sodium symporter                                                                                                  | Escherichia coli (strain 55989 / EAEC)            |
| 9789   | 5241618 | 5241301 TY-2482_chromosome | D8EB88 | Conserved domain protein                                                                                                  | Escherichia coli MS 119-7                         |
| 113182 | 5241645 | 5242481 TY-2482_chromosome | B7LFC6 | Ferrous iron permease                                                                                                     | Escherichia coli (strain 55989 / EAEC)            |
| 111837 | 5242542 | 5243666 TY-2482_chromosome | B7LFC7 | Ferrous iron transport binding protein                                                                                    | Escherichia coli (strain 55989 / EAEC)            |
| 58493  | 5243675 | 5244943 TY-2482_chromosome | B7LFC8 | Heme-binding periplasmic protein involved in iron transport; Tat-dependent exported                                       | Escherichia coli (strain 55989 / EAEC)            |
| 17881  | 5245210 | 5244867 TY-2482_chromosome | E6ANA4 | Conserved domain protein                                                                                                  | Escherichia coli MS 16-3                          |
| 62816  | 5245430 | 5246350 TY-2482_chromosome | B7LFD0 | Putative phosphate starvation-inducible protein with ATPase activity                                                      | Escherichia coli (strain 55989 / EAEC)            |
| 97425  | 5246816 | 5246406 TY-2482_chromosome | B7LFD1 | Putative inner membrane protein associated with biofilm formation                                                         | Escherichia coli (strain 55989 / EAEC)            |
| 84628  | 5248143 | 5246821 TY-2482_chromosome | B7LFD2 | Putative glycosyl transferase associated with biofilm formation                                                           | Escherichia coli (strain 55989 / EAEC)            |
| 104389 | 5250154 | 5248139 TY-2482_chromosome | B7LFD3 | Putative polysaccharide deacetylase associated with biofilm formation; putative lipoprotein                               | Escherichia coli (strain 55989 / EAEC)            |
| 62709  | 5252586 | 5250166 TY-2482_chromosome | B7LFD4 | Putative outer membrane protein associated with biofilm formation                                                         | Escherichia coli (strain 55989 / EAEC)            |
| 79946  | 5253101 | 5254528 TY-2482_chromosome | B5YU69 | Diguanylate cyclase (GGDEF) domain protein                                                                                | Escherichia coli O157:H7 (strain EC4115 / EHEC)   |
| 56371  | 5255438 | 5254575 TY-2482_chromosome | B7L9A9 | IS3 element protein InsF (Transposase ORF B, IS3)                                                                         | Escherichia coli (strain 55989 / EAEC)            |
| 115259 | 5255743 | 5255438 TY-2482_chromosome | B7LFE0 | IS3 element protein InsE                                                                                                  | Escherichia coli (strain 55989 / EAEC)            |
| 91989  | 5255801 | 5256325 TY-2482_chromosome | C6UQ95 | Acyl transferase                                                                                                          | Escherichia coli O157:H7 (strain TW14359 / EHEC)  |
| 107984 | 5256325 | 5257308 TY-2482_chromosome | B7LFE2 | Putative uncharacterized protein ycdU                                                                                     | Escherichia coli (strain 55989 / EAEC)            |
| 107350 | 5257678 | 5258892 TY-2482_chromosome | C8UMN7 | Putative integrase                                                                                                        | Escherichia coli O111:H- (strain 11128 / EHEC)    |
| 25590  | 5260594 | 5259068 TY-2482_chromosome | B7UP05 | Predicted protein                                                                                                         | Escherichia coli O127:H6 (strain E2348/69 / EPEC) |
| 11356  | 5260865 | 5260569 TY-2482_chromosome | E6B380 | Prophage CP4-57 regulatory protein alpA                                                                                   | Escherichia coli 3431                             |
| 28660  | 5260954 | 5262786 TY-2482_chromosome | B1LKM5 | Putative uncharacterized protein                                                                                          | Escherichia coli (strain SMS-3-5 / SECEC)         |
| 68234  | 5264125 | 5264685 TY-2482_chromosome | C8TX59 | Conserved predicted protein                                                                                               | Escherichia coli O103:H2 (strain 12009 / EHEC)    |
| 96441  | 5264843 | 5267200 TY-2482_chromosome | C8UMP3 | Putative helicase                                                                                                         | Escherichia coli O111:H- (strain 11128 / EHEC)    |
| 26933  | 5267460 | 5267224 TY-2482_chromosome | B7MQ88 | Putative uncharacterized protein                                                                                          | Escherichia coli O81 (strain ED1a)                |
| 111612 | 5268912 | 5267479 TY-2482_chromosome | D3GX28 | Transposase                                                                                                               | Escherichia coli O44:H18 (strain 042 / EAEC)      |
| 14010  | 5269130 | 5268912 TY-2482_chromosome | E5ZNV7 | IS66 family element, transposase                                                                                          | Escherichia coli MS 110-3                         |
| 56255  | 5269900 | 5269499 TY-2482_chromosome | C8TKW2 | Putative uncharacterized protein                                                                                          | Escherichia coli O26:H11 (strain 11368 / EHEC)    |
| 107367 | 5270362 | 5270141 TY-2482_chromosome | C8UMT3 | Conserved predicted protein                                                                                               | Escherichia coli O111:H- (strain 11128 / EHEC)    |

|        |         |                            |        |                                                                                                               |                                                   |
|--------|---------|----------------------------|--------|---------------------------------------------------------------------------------------------------------------|---------------------------------------------------|
| 69955  | 5272686 | 5270599 TY-2482_chromosome | B7LXB4 | Putative Iha adhesin ( receptor)                                                                              | Escherichia coli (strain 55989 / EAEC)            |
| 23433  | 5272843 | 5273025 TY-2482_chromosome | D7ZBG8 | Putative uncharacterized protein                                                                              | Escherichia coli MS 69-1                          |
| 9573   | 5273466 | 5273735 TY-2482_chromosome | E6B156 | Putative uncharacterized protein                                                                              | Escherichia coli 3431                             |
| 9741   | 5273660 | 5274354 TY-2482_chromosome | Q5I3M9 | Aec34                                                                                                         | Escherichia coli                                  |
| 85489  | 5274991 | 5275324 TY-2482_chromosome | C6UQF6 | Predicted protein                                                                                             | Escherichia coli O157:H7 (strain TW14359 / EHEC)  |
| 26935  | 5276307 | 5277093 TY-2482_chromosome | B7N312 | Putative uncharacterized protein                                                                              | Escherichia coli O81 (strain ED1a)                |
| 107273 | 5276320 | 5276129 TY-2482_chromosome | C8UMT8 | Conserved predicted protein                                                                                   | Escherichia coli O111:H- (strain 11128 / EHEC)    |
| 90480  | 5277222 | 5277413 TY-2482_chromosome | C8UMU1 | Conserved predicted protein                                                                                   | Escherichia coli O111:H- (strain 11128 / EHEC)    |
| 23688  | 5277833 | 5277374 TY-2482_chromosome | Q8VR34 | Putative uncharacterized protein                                                                              | Escherichia coli                                  |
| 18468  | 5278409 | 5278900 TY-2482_chromosome | Q712Q2 | MchA protein                                                                                                  | Escherichia coli                                  |
| 5108   | 1145    | 21 TY-2482_pTY1            | P09748 | Shufflon protein B'                                                                                           | Escherichia coli                                  |
| 8462   | 1801    | 1148 TY-2482_pTY1          | Q6JB05 | PilU (Prepilin peptidase)                                                                                     | Escherichia coli                                  |
| 8474   | 2346    | 1789 TY-2482_pTY1          | Q6JB04 | Incl1 conjugal transfer transglycosylase protein PilT (PilT) (Putative transglycosylase PilT)                 | Escherichia coli                                  |
| 15758  | 2970    | 2359 TY-2482_pTY1          | D9Z518 | PilS                                                                                                          | Escherichia coli                                  |
| 8472   | 4072    | 2990 TY-2482_pTY1          | Q6JB02 | Incl1 conjugal transfer protein PilR (Integral membrane protein) (PilR)                                       | Escherichia coli                                  |
| 8491   | 5638    | 4088 TY-2482_pTY1          | Q6JB01 | Incl1 conjugal transfer protein PilQ (Nucleotide-binding protein) (PilQ)                                      | Escherichia coli                                  |
| 8727   | 6101    | 5652 TY-2482_pTY1          | Q6JB00 | Incl1 conjugal transfer pilus biogenesis protein PilP (PilP) (PiP protein)                                    | Escherichia coli                                  |
| 8480   | 7383    | 6091 TY-2482_pTY1          | Q6JAZ9 | Incl1 conjugal transfer protein PilO (PilO) (PiO protein)                                                     | Escherichia coli                                  |
| 8729   | 9058    | 7379 TY-2482_pTY1          | C7SA78 | Incl1 conjugal transfer protein PilN (Lipoprotein)                                                            | Escherichia coli                                  |
| 8903   | 9509    | 9075 TY-2482_pTY1          | Q6JAZ7 | Incl1 conjugal transfer protein PilM (PilM) (PiM protein)                                                     | Escherichia coli                                  |
| 22434  | 10576   | 9512 TY-2482_pTY1          | C7SA80 | Lipoprotein                                                                                                   | Escherichia coli                                  |
| 11548  | 11498   | 10908 TY-2482_pTY1         | C7SA81 | PilK                                                                                                          | Escherichia coli                                  |
| 20190  | 11922   | 11626 TY-2482_pTY1         | E9LMM5 | Incl1 conjugal transfer protein TraC                                                                          | Escherichia coli                                  |
| 8946   | 12732   | 12052 TY-2482_pTY1         | Q6JAZ2 | Incl1 conjugal transfer protein TraC (TraC) (TraC protein)                                                    | Escherichia coli                                  |
| 19421  | 13519   | 12929 TY-2482_pTY1         | Q6JAZ1 | TraB                                                                                                          | Escherichia coli                                  |
| 8340   | 14248   | 13964 TY-2482_pTY1         | E2E9F3 | Incl1 conjugal transfer protein TraA (TraA)                                                                   | Escherichia coli                                  |
| 13423  | 14429   | 14169 TY-2482_pTY1         | Q2VNV1 | Putative uncharacterized protein                                                                              | Escherichia coli                                  |
| 13919  | 14903   | 15106 TY-2482_pTY1         | D7XWR3 | Putative uncharacterized protein                                                                              | Escherichia coli MS 84-1                          |
| 63642  | 15402   | 16430 TY-2482_pTY1         | C8TW44 | Putative replication initiation protein                                                                       | Escherichia coli O26:H11 (strain 11368 / EHEC)    |
| 12244  | 15426   | 15109 TY-2482_pTY1         | E1JE00 | Putative uncharacterized protein                                                                              | Escherichia coli MS 124-1                         |
| 11329  | 17278   | 16994 TY-2482_pTY1         | E9LLT7 | Putative replication protein RepA4                                                                            | Escherichia coli                                  |
| 9434   | 18012   | 17506 TY-2482_pTY1         | C7S9Z5 | YafA                                                                                                          | Escherichia coli                                  |
| 36692  | 18670   | 18071 TY-2482_pTY1         | Q68JD7 | YafB                                                                                                          | Escherichia coli                                  |
| 14954  | 18849   | 18628 TY-2482_pTY1         | E6AXF5 | Conserved domain protein                                                                                      | Escherichia coli MS 16-3                          |
| 14773  | 18933   | 20366 TY-2482_pTY1         | C7S9Z7 | YagA                                                                                                          | Escherichia coli                                  |
| 27424  | 20378   | 20599 TY-2482_pTY1         | D3QYQ9 | Putative uncharacterized protein                                                                              | Escherichia coli O55:H7 (strain CB9615 / EPEC)    |
| 5486   | 23652   | 20860 TY-2482_pTY1         | P03008 | Transposase for transposon Tn3                                                                                | Escherichia coli                                  |
| 8409   | 23666   | 23995 TY-2482_pTY1         | ASJTS3 | ORF477 (Putative uncharacterized protein) (Fragment)                                                          | Proteus mirabilis                                 |
| 36068  | 24920   | 24048 TY-2482_pTY1         | Q6BBP7 | Beta-lactamase (Beta-lactamase CTX-M-3) (CTX-M-3 extended-spectrum beta-lactamase) (Extended-spectrum class A | Escherichia coli                                  |
| 8615   | 26441   | 25179 TY-2482_pTY1         | D9Z5B6 | TnpA                                                                                                          | Escherichia coli                                  |
| 28725  | 26915   | 27556 TY-2482_pTY1         | B7LWU0 | Transposon Tn3 resolvase                                                                                      | Escherichia coli (strain 55989 / EAEC)            |
| 8888   | 26997   | 26623 TY-2482_pTY1         | C7S9E2 | Transposase for transposon Tn3 (Truncated TnpA)                                                               | Escherichia coli                                  |
| 105700 | 27742   | 28599 TY-2482_pTY1         | C8UQP5 | TEM-1 beta-lactamase                                                                                          | Escherichia coli O111:H- (strain 11128 / EHEC)    |
| 36929  | 29796   | 29173 TY-2482_pTY1         | C1J8J6 | Cobyrinic acid a,c-diamide synthase (Putative partition-related protein)                                      | Escherichia coli                                  |
| 50805  | 31271   | 30003 TY-2482_pTY1         | Q8Z1G9 | UV protection protein                                                                                         | Salmonella typhi                                  |
| 35141  | 31708   | 31274 TY-2482_pTY1         | Q6EMF3 | ImpA (ImpA UV protection protein) (UV protection and mutation protein) (UV protection protein UmuD            | Escherichia coli                                  |
| 40799  | 32115   | 31708 TY-2482_pTY1         | C1J8J3 | Putative uncharacterized protein                                                                              | Escherichia coli                                  |
| 9032   | 32183   | 33271 TY-2482_pTY1         | D9Z555 | YccB                                                                                                          | Escherichia coli                                  |
| 107813 | 33659   | 34339 TY-2482_pTY1         | C8TW60 | Putative adenine DNA methyltransferase                                                                        | Escherichia coli O26:H11 (strain 11368 / EHEC)    |
| 9358   | 34452   | 35009 TY-2482_pTY1         | Q0E851 | W0054                                                                                                         | Escherichia coli                                  |
| 108627 | 35058   | 35831 TY-2482_pTY1         | C6V3G9 | Putative uncharacterized protein                                                                              | Escherichia coli O157:H7 (strain TW14359 / EHEC)  |
| 28859  | 36606   | 37139 TY-2482_pTY1         | A7ZH45 | Putative DNA methylase                                                                                        | Escherichia coli O139:H28 (strain E24377A / ETEC) |
| 21958  | 36637   | 36140 TY-2482_pTY1         | C7S9L2 | Putative uncharacterized protein                                                                              | Escherichia coli                                  |
| 16306  | 37896   | 38099 TY-2482_pTY1         | E1JFK5 | Putative uncharacterized protein                                                                              | Escherichia coli MS 124-1                         |
| 15080  | 37978   | 37230 TY-2482_pTY1         | E9LLW4 | Putative uncharacterized protein                                                                              | Escherichia coli                                  |
| 35325  | 38099   | 38623 TY-2482_pTY1         | C1J8I1 | Single-stranded DNA-binding protein                                                                           | Escherichia coli                                  |
| 101989 | 38970   | 40931 TY-2482_pTY1         | D3H5D8 | ParB-like nuclease                                                                                            | Escherichia coli O44:H18 (strain 042 / EAEC)      |
| 18727  | 40986   | 41420 TY-2482_pTY1         | E0WGX5 | Plasmid SOS inhibition protein                                                                                | Escherichia coli                                  |
| 36030  | 41420   | 42136 TY-2482_pTY1         | C1J8T1 | Plasmid SOS inhibition protein PsiA (PsiA) (PsiA protein)                                                     | Escherichia coli                                  |
| 36653  | 42136   | 42729 TY-2482_pTY1         | C1J8T0 | Putative uncharacterized protein (YgaA)                                                                       | Escherichia coli                                  |
| 18581  | 42804   | 43691 TY-2482_pTY1         | C7SA25 | YgbA-ard                                                                                                      | Escherichia coli                                  |
| 41714  | 44084   | 44854 TY-2482_pTY1         | C1J8S7 | Putative uncharacterized protein                                                                              | Escherichia coli                                  |
| 49483  | 44858   | 45214 TY-2482_pTY1         | C1J8H1 | Putative uncharacterized protein                                                                              | Escherichia coli                                  |
| 36932  | 45319   | 45780 TY-2482_pTY1         | C1J8S5 | Conserved hypothetical plasmid protein (Putative uncharacterized protein)                                     | Escherichia coli                                  |

|       |       |                    |        |                                                                                                                          |                                                |
|-------|-------|--------------------|--------|--------------------------------------------------------------------------------------------------------------------------|------------------------------------------------|
| 19423 | 45780 | 46691 TY-2482_pTY1 | Q68J76 | YdgA                                                                                                                     | Escherichia coli                               |
| 85997 | 46723 | 46959 TY-2482_pTY1 | C8TW70 | Putative uncharacterized protein                                                                                         | Escherichia coli O26:H11 (strain 11368 / EHEC) |
| 35255 | 47244 | 46996 TY-2482_pTY1 | C1J8S2 | Putative uncharacterized protein ygeA (YgeA)                                                                             | Escherichia coli                               |
| 24542 | 47819 | 47306 TY-2482_pTY1 | B6IC38 | Putative uncharacterized protein                                                                                         | Escherichia coli (strain SE11)                 |
| 19743 | 47821 | 48669 TY-2482_pTY1 | Q68J80 | YdiA                                                                                                                     | Escherichia coli                               |
| 8574  | 49100 | 48762 TY-2482_pTY1 | D9Z504 | YggA                                                                                                                     | Escherichia coli                               |
| 8415  | 49328 | 49657 TY-2482_pTY1 | C7SA35 | Plasmid mobilization protein (Plasmid relaxome component protein Nika)                                                   | Escherichia coli                               |
| 97151 | 49671 | 52367 TY-2482_pTY1 | C8TW76 | Putative plasmid conjugation system NikB protein                                                                         | Escherichia coli O26:H11 (strain 11368 / EHEC) |
| 35836 | 54698 | 52410 TY-2482_pTY1 | Q68J84 | Conjugal transfer protein (TrbC)                                                                                         | Escherichia coli                               |
| 9474  | 55767 | 54694 TY-2482_pTY1 | D9Z502 | TrbB                                                                                                                     | Escherichia coli                               |
| 16955 | 56988 | 55783 TY-2482_pTY1 | C7SA39 | TrbA protein                                                                                                             | Escherichia coli                               |
| 23795 | 58272 | 57346 TY-2482_pTY1 | C7SA40 | FinQ                                                                                                                     | Escherichia coli                               |
| 11048 | 58610 | 58891 TY-2482_pTY1 | C7SA41 | Post-segregation killing protein                                                                                         | Escherichia coli                               |
| 17705 | 59524 | 59817 TY-2482_pTY1 | D8EU26 | Putative uncharacterized protein                                                                                         | Escherichia coli MS 107-1                      |
| 28586 | 60127 | 59888 TY-2482_pTY1 | B6IC49 | Putative uncharacterized protein                                                                                         | Escherichia coli (strain SE11)                 |
| 11328 | 61165 | 60554 TY-2482_pTY1 | E9LLN8 | Surface exclusion protein ExcA                                                                                           | Escherichia coli                               |
| 18849 | 63478 | 61244 TY-2482_pTY1 | B3AEC6 | Integral membrane protein                                                                                                | Escherichia coli O157:H7 str. EC4401           |
| 12474 | 64090 | 63509 TY-2482_pTY1 | C7SA45 | TraX protein                                                                                                             | Escherichia coli                               |
| 14774 | 65321 | 64122 TY-2482_pTY1 | C7SA46 | TraW protein                                                                                                             | Escherichia coli                               |
| 20548 | 65914 | 65291 TY-2482_pTY1 | D9Z526 | TraV                                                                                                                     | Escherichia coli                               |
| 36778 | 68946 | 65905 TY-2482_pTY1 | Q68JA2 | TraU                                                                                                                     | Escherichia coli                               |
| 8633  | 69836 | 69039 TY-2482_pTY1 | C7SA49 | Incl1 conjugal transfer protein TraT (TraT protein)                                                                      | Escherichia coli                               |
| 23932 | 70008 | 69823 TY-2482_pTY1 | C7SA50 | TraS protein                                                                                                             | Escherichia coli                               |
| 8628  | 70476 | 70075 TY-2482_pTY1 | C7SA51 | TraR (TraR protein)                                                                                                      | Escherichia coli                               |
| 8493  | 71054 | 70530 TY-2482_pTY1 | C7SA52 | Incl1 conjugal transfer protein TraQ (TraQ protein)                                                                      | Escherichia coli                               |
| 16313 | 71758 | 71057 TY-2482_pTY1 | C7SA53 | TraP protein                                                                                                             | Escherichia coli                               |
| 14775 | 73047 | 71761 TY-2482_pTY1 | C7SA54 | TraO protein                                                                                                             | Escherichia coli                               |
| 9436  | 74033 | 73053 TY-2482_pTY1 | C7SA55 | TraN protein                                                                                                             | Escherichia coli                               |
| 9039  | 74736 | 74047 TY-2482_pTY1 | C7SA56 | Incl1 conjugal transfer protein TraM (TraM protein)                                                                      | Escherichia coli                               |
| 8614  | 75080 | 74736 TY-2482_pTY1 | C7SA57 | Incl1 conjugal transfer protein TraL (TraL) (TraL protein)                                                               | Escherichia coli                               |
| 17670 | 78862 | 75101 TY-2482_pTY1 | C7SA58 | SogL protein                                                                                                             | Escherichia coli                               |
| 8673  | 79863 | 78955 TY-2482_pTY1 | E9LLQ3 | Putative uncharacterized protein                                                                                         | Escherichia coli                               |
| 16751 | 80953 | 79808 TY-2482_pTY1 | C7SA62 | TraJ protein                                                                                                             | Escherichia coli                               |
| 12436 | 81768 | 80953 TY-2482_pTY1 | Q68JB5 | TraI                                                                                                                     | Escherichia coli                               |
| 8414  | 82223 | 81768 TY-2482_pTY1 | Q68JB6 | Incl1 conjugal transfer protein TraH (TraH) (TraH protein)                                                               | Escherichia coli                               |
| 15456 | 83202 | 82621 TY-2482_pTY1 | E9LM08 | Incl1 conjugal transfer protein TraG                                                                                     | Escherichia coli                               |
| 13732 | 84464 | 83265 TY-2482_pTY1 | Q68JB8 | TraF                                                                                                                     | Escherichia coli                               |
| 10587 | 85374 | 84553 TY-2482_pTY1 | Q68JB9 | TraE                                                                                                                     | Escherichia coli                               |
| 5107  | 86678 | 86986 TY-2482_pTY1 | P09747 | Shufflon protein B                                                                                                       | Escherichia coli                               |
| 4552  | 86679 | 85528 TY-2482_pTY1 | P10487 | Shufflon-specific DNA recombinase                                                                                        | Escherichia coli                               |
| 10369 | 87223 | 87527 TY-2482_pTY1 | E6BU42 | Shufflon protein C                                                                                                       | Escherichia coli MS 85-1                       |
| 12944 | 87302 | 86994 TY-2482_pTY1 | D8EU43 | Putative uncharacterized protein                                                                                         | Escherichia coli MS 107-1                      |
| 5113  | 87790 | 87530 TY-2482_pTY1 | P09750 | Shufflon protein C'                                                                                                      | Escherichia coli                               |
| 9705  | 88058 | 88447 TY-2482_pTY1 | E9Y7H3 | Shufflon protein A (Fragment)                                                                                            | Escherichia coli H489                          |
| 5115  | 88134 | 87790 TY-2482_pTY1 | P09751 | Shufflon protein D'                                                                                                      | Escherichia coli                               |
| 5105  | 88695 | 88450 TY-2482_pTY1 | P09746 | Shufflon protein A'                                                                                                      | Escherichia coli                               |
| 14295 | 2     | 328 TY-2482_pTY2   | Q4E6D2 | Transposase (IS4 family)                                                                                                 | Wolbachia endosymbiont of Drosophila simulans  |
| 14394 | 606   | 1514 TY-2482_pTY2  | E9Z073 | Transposase                                                                                                              | Escherichia coli M863                          |
| 26934 | 2164  | 1763 TY-2482_pTY2  | B7LWW4 | Transposase ORF A, IS1                                                                                                   | Escherichia coli (strain 55989 / EAEC)         |
| 83458 | 3062  | 2268 TY-2482_pTY2  | B7LWW2 | Putative transcriptional activator aggR (AAF-III) regulatory protein                                                     | Escherichia coli (strain 55989 / EAEC)         |
| 18305 | 3600  | 3233 TY-2482_pTY2  | E7J5W2 | Integrase core domain protein                                                                                            | Escherichia coli RN587/1                       |
| 27677 | 4028  | 4598 TY-2482_pTY2  | B7LFP9 | Transposase ORF B, IS629                                                                                                 | Escherichia coli (strain 55989 / EAEC)         |
| 16059 | 4899  | 4531 TY-2482_pTY2  | Q9S110 | Orf57 protein                                                                                                            | Escherichia coli                               |
| 8444  | 5122  | 4817 TY-2482_pTY2  | P71290 | Orf58 protein                                                                                                            | Escherichia coli                               |
| 52540 | 5193  | 5498 TY-2482_pTY2  | B7LBU5 | Putative reverse transcriptase-like protein from putative prophage or plasmid (EC 2.7.7.49)                              | Escherichia coli (strain 55989 / EAEC)         |
| 16058 | 6008  | 5574 TY-2482_pTY2  | Q9S110 | Orf57 protein                                                                                                            | Escherichia coli                               |
| 8443  | 6231  | 5926 TY-2482_pTY2  | P71290 | Orf58 protein                                                                                                            | Escherichia coli                               |
| 52527 | 6302  | 7822 TY-2482_pTY2  | B7LB68 | Putative reverse transcriptase-like protein from putative prophage or plasmid (EC 2.7.7.49) (Reverse transcriptase-like) | Escherichia coli (strain 55989 / EAEC)         |
| 26332 | 7900  | 8397 TY-2482_pTY2  | Q327G0 | IS629 ORF2                                                                                                               | Shigella dysenteriae serotype 1 (strain Sd197) |
| 26240 | 8942  | 8595 TY-2482_pTY2  | B7LWW0 | 14 kDa aggregative adherence fimbriae I protein (Modular protein)                                                        | Escherichia coli (strain 55989 / EAEC)         |
| 2658  | 9296  | 10276 TY-2482_pTY2 | P0CE57 | Transposase insH for insertion sequence element ISSR                                                                     | Escherichia coli (strain K12)                  |
| 83352 | 10498 | 10737 TY-2482_pTY2 | E1PC79 | Putative secreted autotransporter toxin sat                                                                              | Escherichia coli OR:K5:H- (strain ABU 83972)   |
| 26069 | 10854 | 11069 TY-2482_pTY2 | B7LWV8 | Putative uncharacterized protein                                                                                         | Escherichia coli (strain 55989 / EAEC)         |
| 7600  | 11255 | 12280 TY-2482_pTY2 | P16943 | Insertion element IS630 uncharacterized 39 kDa protein (ISO-IS200 39 kDa protein)                                        | Shigella sonnei                                |

|        |       |                    |        |                                                                                                             |                                                   |
|--------|-------|--------------------|--------|-------------------------------------------------------------------------------------------------------------|---------------------------------------------------|
| 20460  | 12594 | 14385 TY-2482_pTY2 | B3HJU4 | Serine protease eata (EC 3.4.21.-)                                                                          | Escherichia coli B7A                              |
| 26239  | 14596 | 14363 TY-2482_pTY2 | B7LWV1 | Putative uncharacterized protein                                                                            | Escherichia coli (strain 55989 / EAEC)            |
| 25401  | 14987 | 14742 TY-2482_pTY2 | B7LWV0 | Transposase ORF A, IS629                                                                                    | Escherichia coli (strain 55989 / EAEC)            |
| 88207  | 15334 | 16494 TY-2482_pTY2 | B7LWU9 | AatP permease                                                                                               | Escherichia coli (strain 55989 / EAEC)            |
| 81125  | 16494 | 17729 TY-2482_pTY2 | B7LWU8 | AatA outermembrane protein                                                                                  | Escherichia coli (strain 55989 / EAEC)            |
| 73706  | 17629 | 18447 TY-2482_pTY2 | B7LWU7 | AatB                                                                                                        | Escherichia coli (strain 55989 / EAEC)            |
| 72382  | 18443 | 19069 TY-2482_pTY2 | B7LWU6 | AatC ATB binding protein of ABC transporter (EC 3.6.3.28)                                                   | Escherichia coli (strain 55989 / EAEC)            |
| 67969  | 19089 | 20297 TY-2482_pTY2 | B7LWU5 | AatD                                                                                                        | Escherichia coli (strain 55989 / EAEC)            |
| 28478  | 21275 | 22405 TY-2482_pTY2 | B7LBV5 | Transposase, IS110 family                                                                                   | Escherichia coli (strain 55989 / EAEC)            |
| 73796  | 24086 | 22521 TY-2482_pTY2 | B7LFP0 | Putative uncharacterized protein                                                                            | Escherichia coli (strain 55989 / EAEC)            |
| 56541  | 24467 | 24120 TY-2482_pTY2 | B7LA97 | Putative uncharacterized protein                                                                            | Escherichia coli (strain 55989 / EAEC)            |
| 57887  | 24901 | 24467 TY-2482_pTY2 | B7LA98 | Putative uncharacterized protein                                                                            | Escherichia coli (strain 55989 / EAEC)            |
| 93542  | 24997 | 25194 TY-2482_pTY2 | C6UQD7 | Putative uncharacterized protein                                                                            | Escherichia coli O157:H7 (strain TW14359 / EHEC)  |
| 55302  | 29586 | 25495 TY-2482_pTY2 | B7LBW0 | Serine protease pic (ShMu)                                                                                  | Escherichia coli (strain 55989 / EAEC)            |
| 24349  | 30533 | 29898 TY-2482_pTY2 | A7ZH69 | Resolvase domain protein                                                                                    | Escherichia coli O139:H28 (strain E24377A / ETEC) |
| 90454  | 31115 | 31978 TY-2482_pTY2 | B7LX00 | Putative uncharacterized protein                                                                            | Escherichia coli (strain 55989 / EAEC)            |
| 15087  | 32294 | 32145 TY-2482_pTY2 | D6IDD7 | X polypeptide                                                                                               | Escherichia coli B185                             |
| 73678  | 32880 | 32281 TY-2482_pTY2 | B7LWZ9 | Putative uncharacterized protein                                                                            | Escherichia coli (strain 55989 / EAEC)            |
| 69599  | 33211 | 33591 TY-2482_pTY2 | D3H5C8 | Conjugative transfer protein                                                                                | Escherichia coli O44:H18 (strain 042 / EAEC)      |
| 26017  | 33728 | 34255 TY-2482_pTY2 | B7LWZ7 | Protein traj                                                                                                | Escherichia coli (strain 55989 / EAEC)            |
| 14377  | 34938 | 34255 TY-2482_pTY2 | E1U309 | Transposase InsAB'                                                                                          | Escherichia coli                                  |
| 113449 | 34979 | 39662 TY-2482_pTY2 | D3H556 | DNA helicase I (EC 3.6.1.-)                                                                                 | Escherichia coli O44:H18 (strain 042 / EAEC)      |
| 84453  | 40486 | 41043 TY-2482_pTY2 | B7LWY8 | Fertility inhibition protein (Conjugal transfer repressor)                                                  | Escherichia coli (strain 55989 / EAEC)            |
| 57886  | 41272 | 41706 TY-2482_pTY2 | B7LA98 | Putative uncharacterized protein                                                                            | Escherichia coli (strain 55989 / EAEC)            |
| 92994  | 41706 | 41999 TY-2482_pTY2 | D3GV17 | Transposase                                                                                                 | Escherichia coli O44:H18 (strain 042 / EAEC)      |
| 108668 | 41950 | 42261 TY-2482_pTY2 | B7LBX6 | Putative uncharacterized protein                                                                            | Escherichia coli (strain 55989 / EAEC)            |
| 104768 | 43889 | 42321 TY-2482_pTY2 | D3H551 | Transposase                                                                                                 | Escherichia coli O44:H18 (strain 042 / EAEC)      |
| 82235  | 44256 | 43912 TY-2482_pTY2 | D3H552 | Transposase                                                                                                 | Escherichia coli O44:H18 (strain 042 / EAEC)      |
| 86545  | 44933 | 44259 TY-2482_pTY2 | D3H553 | Transposase                                                                                                 | Escherichia coli O44:H18 (strain 042 / EAEC)      |
| 9931   | 45002 | 45250 TY-2482_pTY2 | Q84A18 | Putative uncharacterized protein orf7                                                                       | Escherichia coli                                  |
| 2659   | 46644 | 45664 TY-2482_pTY2 | P0CE57 | Transposase insH for insertion sequence element IS5R                                                        | Escherichia coli (strain K12)                     |
| 35456  | 46922 | 47173 TY-2482_pTY2 | Q79R15 | Negative regulator of repA1 expression (RepA2) (Replication protein) (Replication regulatory protein RepA2) | Escherichia coli                                  |
| 78128  | 47481 | 47666 TY-2482_pTY2 | C8URD0 | Replication initiation protein RepA1                                                                        | Escherichia coli O111:H- (strain 11128 / EHEC)    |
| 78129  | 47629 | 48306 TY-2482_pTY2 | C8URD0 | Replication initiation protein RepA1                                                                        | Escherichia coli O111:H- (strain 11128 / EHEC)    |
| 7991   | 48672 | 49052 TY-2482_pTY2 | P03848 | Uncharacterized protein repA4                                                                               | Escherichia coli                                  |
| 62626  | 49217 | 49498 TY-2482_pTY2 | B7LWY0 | Putative uncharacterized protein                                                                            | Escherichia coli (strain 55989 / EAEC)            |
| 77292  | 49501 | 49773 TY-2482_pTY2 | B7LWX9 | Putative uncharacterized protein                                                                            | Escherichia coli (strain 55989 / EAEC)            |
| 8675   | 49782 | 50024 TY-2482_pTY2 | D9Z536 | IPF_393                                                                                                     | Escherichia coli                                  |
| 14303  | 50270 | 49986 TY-2482_pTY2 | B1VCJ6 | ORF 153 Hypothetical protein                                                                                | Escherichia coli                                  |
| 73622  | 50759 | 51496 TY-2482_pTY2 | B7LWX4 | Site-specific recombinase                                                                                   | Escherichia coli (strain 55989 / EAEC)            |
| 101487 | 52755 | 51781 TY-2482_pTY2 | B7LWX3 | RepFIB replication protein A                                                                                | Escherichia coli (strain 55989 / EAEC)            |
| 15680  | 53553 | 53068 TY-2482_pTY2 | C8CGL3 | Putative uncharacterized protein                                                                            | Escherichia coli                                  |
| 8629   | 54052 | 54810 TY-2482_pTY2 | D9Z540 | VagD                                                                                                        | Escherichia coli                                  |
| 15238  | 54804 | 55199 TY-2482_pTY2 | D8EV54 | Putative uncharacterized protein                                                                            | Escherichia coli MS 107-1                         |
| 107875 | 55269 | 55544 TY-2482_pTY2 | B7LX17 | Protein ccdA (Protein letA) (Protein H) (LynA) (Modular protein)                                            | Escherichia coli (strain 55989 / EAEC)            |
| 77373  | 55522 | 55851 TY-2482_pTY2 | B7LX16 | Cytotoxic protein ccdB (Protein letB) (Protein G) (LynB)                                                    | Escherichia coli (strain 55989 / EAEC)            |
| 116015 | 55855 | 56658 TY-2482_pTY2 | B7LX15 | Putative resolvase (Protein D)                                                                              | Escherichia coli (strain 55989 / EAEC)            |
| 104191 | 56807 | 57481 TY-2482_pTY2 | D3H584 | Putative uncharacterized protein                                                                            | Escherichia coli O44:H18 (strain 042 / EAEC)      |
| 13306  | 57571 | 57876 TY-2482_pTY2 | Q9Z4E6 | YegA protein                                                                                                | Salmonella typhimurium                            |
| 15380  | 58239 | 59270 TY-2482_pTY2 | E9LLV1 | Plasmid partitioning and stability protein StbA                                                             | Escherichia coli                                  |
| 22906  | 59266 | 59679 TY-2482_pTY2 | Q3ZU22 | Plasmid stability protein                                                                                   | Escherichia coli                                  |
| 36047  | 60958 | 59687 TY-2482_pTY2 | C1J8J5 | DNA polymerase V subunit UmuC (UV protection protein)                                                       | Escherichia coli                                  |
| 10165  | 61398 | 60961 TY-2482_pTY2 | A1YLB7 | ImpA                                                                                                        | Escherichia coli                                  |
| 20443  | 61422 | 62030 TY-2482_pTY2 | A1YLB6 | Putative resolvase                                                                                          | Escherichia coli                                  |
| 13396  | 62440 | 62219 TY-2482_pTY2 | Q3L7G2 | Putative uncharacterized protein                                                                            | Escherichia coli                                  |
| 178    | 62882 | 63637 TY-2482_pTY2 | P46004 | Chaperone protein AggD                                                                                      | Escherichia coli                                  |
| 25242  | 63654 | 66179 TY-2482_pTY2 | B7LX07 | Outer membrane usher protein Agg3C                                                                          | Escherichia coli (strain 55989 / EAEC)            |
| 14674  | 66734 | 67234 TY-2482_pTY2 | O87745 | AggA457 protein                                                                                             | Escherichia coli                                  |
| 14185  | 67374 | 67691 TY-2482_pTY2 | E9XTW5 | Integrase core domain-containing protein                                                                    | Escherichia coli TW10509                          |
| 37864  | 67968 | 67666 TY-2482_pTY2 | F2W481 | ISL3 family transposase                                                                                     | Escherichia coli                                  |
| 26474  | 68195 | 68752 TY-2482_pTY2 | Q8XC14 | Putative IS encoded protein encoded within prophage CP-933C                                                 | Escherichia coli O157:H7                          |
| 104870 | 68805 | 70340 TY-2482_pTY2 | B7L938 | Putative transposase ORF 1, IS66 family                                                                     | Escherichia coli (strain 55989 / EAEC)            |
| 16883  | 70481 | 70994 TY-2482_pTY2 | E3Y4T4 | Integrase core domain protein                                                                               | Shigella flexneri 2a str. 2457T                   |
| 15950  | 71380 | 70931 TY-2482_pTY2 | E9Z010 | Putative uncharacterized protein                                                                            | Escherichia coli M863                             |

|       |       |                    |        |                                                                                                                                                      |                                           |
|-------|-------|--------------------|--------|------------------------------------------------------------------------------------------------------------------------------------------------------|-------------------------------------------|
| 14071 | 71859 | 71362 TY-2482_pTY2 | E9Z008 | Transposase                                                                                                                                          | Escherichia coli M863                     |
| 24986 | 72172 | 71990 TY-2482_pTY2 | B7LWX0 | Putative tail fiber protein                                                                                                                          | Escherichia coli (strain 55989 / EAEC)    |
| 77291 | 72295 | 73320 TY-2482_pTY2 | B7LWW9 | Putative uncharacterized protein                                                                                                                     | Escherichia coli (strain 55989 / EAEC)    |
| 29189 | 73327 | 73863 TY-2482_pTY2 | B7LWW8 | Isopentenyl-diphosphate Delta-isomerase 2 (IPP isomerase 2) (EC 5.3.3.2) (IPP:DMAPP isomerase 2) (Isopentenyl pyruvate 3-methylcrotonyl transferase) | Escherichia coli (strain 55989 / EAEC)    |
| 24071 | 74681 | 75328 TY-2482_pTY2 | B1LJZ9 | IS5 transposase                                                                                                                                      | Escherichia coli (strain SMS-3-5 / SECEC) |
| 36208 | 523   | 996 TY-2482_pTY3   | O07102 | Plasmid replication protein (RepA)                                                                                                                   | Escherichia coli                          |
| 18920 | 1549  | 1029 TY-2482_pTY3  | A0A1K7 | Probable replication protein                                                                                                                         | Escherichia coli                          |



















































8666 / NRRL B-766 / W





'iophage SfVI'
