# Supplementary material
Source: PubMed Central journal article supplement (PMC3879109)
Supplement: NIHMS504424-supplement-Supplementary_Table_4.pdf [file NIHMS504424-supplement-Supplementary_Table_4.pdf]

Supplementary Table 4. C227-11 versus C227-11-delRM gene expression signature.

| Gene name | reference name     | strand | start position | end position | C227_sample1 | C227_sample2 | C227_sample3 | C227-RM_sample1 | C227-RM_sample2 | C227-RM_sample3 | log2 fold change | log10 p value | log10 FDR |
|-----------|--------------------|--------|----------------|--------------|--------------|--------------|--------------|-----------------|-----------------|-----------------|------------------|---------------|-----------|
| C8TNI9    | TY-2482_chromosome | +      | 1              | 630          | 108.2657936  | 127.9040707  | 117.4933172  | 460.7073411     | 331.2249858     | 236.2846695     | -1.674208981     | 9.672567575   | 8.7621848 |
| Q4E6D2    | TY-2482_chromosome | +      | 2              | 328          | 62.74442853  | 55.60244922  | 74.27754428  | 44.00719616     | 43.67960503     | 42.17717556     | 0.622720807      | 1.914936166   | 1.5974206 |
| P09748    | TY-2482_chromosome | -      | 21             | 1145         | 75.3249493   | 94.12343034  | 83.81769793  | 35.97952038     | 26.3518352      | 21.45279859     | 1.479827099      | 9.751988159   | 8.8361523 |
| O07102    | TY-2482_chromosome | +      | 523            | 996          | 856.1151583  | 927.2572209  | 964.0698405  | 757.4306533     | 882.043154      | 452.1580588     | 0.328134212      | 1.085777626   | 0.8772967 |
| E9Z073    | TY-2482_chromosome | +      | 606            | 1514         | 159.8562806  | 180.0163125  | 182.3293323  | 89.82984095     | 103.8086942     | 88.31066936     | 0.877592379      | 5.13761463    | 4.5048023 |
| D3GUR0    | TY-2482_chromosome | -      | 778            | 2049         | 88.95562947  | 103.9808205  | 78.22410551  | 91.45740633     | 105.7257785     | 55.99222846     | -0.028452947     | 0.141242426   | 0.1034206 |
| A0A1K7    | TY-2482_chromosome | -      | 1029           | 1549         | 207.3308183  | 166.4085529  | 191.4767895  | 158.6026273     | 211.2613245     | 164.6649765     | 0.136748542      | 0.166250392   | 0.1223287 |
| B7LWV4    | TY-2482_chromosome | -      | 1763           | 2164         | 641.6926831  | 641.1045919  | 584.1045239  | 403.1557006     | 411.5154066     | 185.25889       | 0.786776151      | 3.522242792   | 3.0254616 |
| Q6JB04    | TY-2482_chromosome | -      | 1789           | 2346         | 117.7884515  | 168.1246272  | 148.6081519  | 29.77154391     | 27.31154623     | 21.36793121     | 2.361240492      | 23.11185797   | 21.751365 |
| B7LWV2    | TY-2482_chromosome | -      | 2268           | 3062         | 909.9610335  | 1032.202167  | 976.4707587  | 751.2132707     | 528.8370309     | 113.4047735     | 0.838905144      | 2.487150925   | 2.1047264 |
| D9Z518    | TY-2482_chromosome | -      | 2359           | 2970         | 221.0402272  | 279.8986533  | 278.8007777  | 70.14173734     | 69.29063082     | 29.84375314     | 2.079660373      | 18.08690845   | 16.852444 |
| P0CE57    | TY-2482_chromosome | -      | 2658           | 3638         | 229.7615191  | 196.6675748  | 202.5677524  | 118.7706717     | 114.6181413     | 132.6900832     | 0.819356183      | 4.107908203   | 3.558478  |
| Q6JB02    | TY-2482_chromosome | -      | 2990           | 4072         | 179.9368812  | 223.3318916  | 222.6629074  | 95.58001841     | 81.88700005     | 71.37998304     | 1.263261538      | 9.581190787   | 8.67772   |
| E7JSW2    | TY-2482_chromosome | -      | 3233           | 3600         | 218.0803165  | 301.5006197  | 237.5033364  | 61.01576623     | 85.78846784     | 37.61787157     | 1.900987845      | 15.73654071   | 14.567154 |
| B7LFP9    | TY-2482_chromosome | +      | 4028           | 4598         | 535.2454405  | 589.9298697  | 636.0222137  | 646.2376835     | 578.7176416     | 682.630921      | -0.103142392     | 0.240922561   | 0.1788332 |
| Q6JB01    | TY-2482_chromosome | -      | 4088           | 5638         | 214.538571   | 214.3622573  | 237.1849845  | 135.5837284     | 100.8976769     | 126.22091       | 0.881089574      | 4.810245264   | 4.2012794 |
| Q9S110    | TY-2482_chromosome | -      | 4531           | 4899         | 553.2636565  | 557.1392527  | 644.6588878  | 756.6440053     | 635.1144642     | 786.5371375     | -0.279756105     | 0.898346342   | 0.1717115 |
| P71290    | TY-2482_chromosome | -      | 4817           | 5122         | 281.0841756  | 271.5034046  | 324.4576422  | 427.001524      | 322.9138381     | 465.3520203     | -0.421705046     | 1.558333357   | 1.2870889 |
| D3GUQ6    | TY-2482_chromosome | +      | 5035           | 5241         | 155.3612341  | 189.3347264  | 166.2951298  | 8.339870043     | 5.464775752     | 0.265243807     | 4.932829737      | 60.89564763   | 58.816086 |
| B7LBU5    | TY-2482_chromosome | +      | 5193           | 5498         | 150.842041   | 186.7940045  | 167.6672955  | 291.565198      | 241.0331723     | 340.3180357     | -0.809732618     | 3.691806202   | 3.1751628 |
| D3GUQ5    | TY-2482_chromosome | +      | 5272           | 5496         | 161.2840197  | 209.4962376  | 178.1736257  | 8.913554309     | 3.555936009     | 5.366868489     | 4.802334655      | 60.12129475   | 58.053014 |
| Q9S110    | TY-2482_chromosome | -      | 5574           | 6008         | 362.693308   | 338.3514846  | 379.759366   | 449.8859907     | 391.2307623     | 482.604905      | -0.253604106     | 0.801574852   | 0.6372182 |
| Q6JB00    | TY-2482_chromosome | -      | 5652           | 6101         | 53.59841748  | 66.36995518  | 66.16406033  | 34.82026979     | 26.26915235     | 41.71890367     | 0.856740431      | 3.159225073   | 2.6990859 |
| D3GUQ4    | TY-2482_chromosome | +      | 5771           | 7318         | 218.9012842  | 271.6169025  | 237.6044927  | 48.22882268     | 45.53952956     | 32.03744164     | 2.42796498       | 28.919569     | 27.444915 |
| P71290    | TY-2482_chromosome | -      | 5926           | 6231         | 281.8891234  | 288.4859266  | 285.8585207  | 386.2861416     | 311.1204827     | 401.0348379     | -0.35986772      | 1.095279507   | 0.8847947 |
| Q6JAZ9    | TY-2482_chromosome | -      | 6091           | 7383         | 237.8124964  | 237.0265702  | 231.6696975  | 130.6753714     | 103.6031227     | 156.0851834     | 0.878196536      | 4.355437098   | 3.7877584 |
| B7LB68    | TY-2482_chromosome | +      | 6302           | 7822         | 1089.633527  | 1058.853147  | 1042.4243    | 1829.126616     | 1587.969907     | 1769.464117     | -0.707487707     | 3.221360505   | 2.7566401 |
| Q83Z99    | TY-2482_chromosome | +      | 7347           | 7296         | 71.94466925  | 53.44512155  | 69.43761057  | 10.23296379     | 19.28843616     | 8.272823066     | 2.416412364      | 14.72697983   | 13.599113 |
| C7SA78    | TY-2482_chromosome | -      | 7379           | 9058         | 431.6084386  | 402.1324306  | 388.7192617  | 178.4685756     | 194.7715185     | 189.4493884     | 1.13070094       | 7.349947624   | 6.5753974 |
| Q3Z7G0    | TY-2482_chromosome | +      | 7900           | 8397         | 154.311224   | 129.4509689  | 122.5243438  | 131.5332969     | 117.3647        | 115.9134595     | 0.14563432       | 0.35364052    | 0.2672826 |
| C3VUZ6    | TY-2482_chromosome | +      | 7952           | 9223         | 81.39679021  | 89.80598901  | 87.15860878  | 17.74032958     | 12.63216909     | 22.02290457     | 2.307204321      | 17.64493304   | 16.423338 |
| B7LWV0    | TY-2482_chromosome | -      | 8595           | 8942         | 12967.80272  | 18052.69759  | 18461.15927  | 6558.949899     | 8096.090309     | 3476.940578     | 1.342810901      | 3.088022968   | 2.6381923 |
| Q6JAZ7    | TY-2482_chromosome | -      | 9075           | 9509         | 54.79424402  | 42.45037176  | 46.77603275  | 15.03071821     | 13.59824435     | 18.22485718     | 1.678345808      | 7.865699644   | 7.0551587 |
| D3GUQ7    | TY-2482_chromosome | +      | 9219           | 11318        | 139.5225441  | 196.1540463  | 162.3433289  | 24.42106639     | 30.89936801     | 45.39195604     | 2.311859746      | 21.05008742   | 19.739047 |
| P0CE57    | TY-2482_chromosome | +      | 9296           | 10276        | 248.3762144  | 219.890696   | 237.0153303  | 158.7794432     | 138.2044105     | 202.0773227     | 0.563383605      | 1.776653705   | 1.4777121 |
| C7SA80    | TY-2482_chromosome | -      | 9512           | 10576        | 155.5948277  | 154.3917197  | 142.4373782  | 62.42369807     | 54.53349352     | 65.63890432     | 1.300036471      | 9.764391381   | 8.8461973 |
| B7LWV8    | TY-2482_chromosome | +      | 10854          | 11069        | 194.7759507  | 283.8377698  | 250.2946961  | 18.69551105     | 33.88958307     | 16.23162681     | 3.32474174       | 38.7638639    | 37.053908 |
| P16943    | TY-2482_chromosome | +      | 11255          | 12280        | 668.6441886  | 644.0018092  | 607.2411824  | 153.1112499     | 169.3745036     | 116.284324      | 2.086550052      | 21.43182326   | 20.112922 |
| E9LMM5    | TY-2482_chromosome | -      | 11626          | 11922        | 36.03785738  | 27.15419573  | 33.01647542  | 16.67003701     | 33.00068515     | 14.92154969     | 0.62500995       | 1.181257595   | 0.9593454 |
| Q6JAZ2    | TY-2482_chromosome | -      | 12052          | 12732        | 62.84433041  | 64.07124049  | 57.26278115  | 10.75796207     | 22.95526141     | 10.85910746     | 2.027024501      | 11.63802689   | 10.631894 |
| B3HJU4    | TY-2482_chromosome | +      | 12594          | 14385        | 1998.117558  | 2094.187021  | 2152.438157  | 644.725667      | 631.5143415     | 764.0600975     | 1.641021298      | 13.84117073   | 12.742291 |
| Q6JAZ1    | TY-2482_chromosome | -      | 12929          | 13519        | 83.32401943  | 78.75968641  | 50.83284875  | 11.62099237     | 16.4556283      | 11.98234027     | 2.344666993      | 15.03268174   | 13.894474 |
| C8UMU7    | TY-2482_chromosome | +      | 14018          | 14524        | 31.7689477   | 45.71891784  | 49.208013    | 40.06075172     | 43.73408505     | 34.46577177     | 0.061606088      | 0.128567998   | 0.0938138 |
| Q2VNV1    | TY-2482_chromosome | -      | 14169          | 14429        | 2050.281273  | 1700.111786  | 1328.417035  | 285.8220322     | 1002.799378     | 221.0206095     | 1.72849245       | 5.805921395   | 5.1247563 |
| B7LWV1    | TY-2482_chromosome | -      | 14363          | 14596        | 119.0332512  | 108.5339238  | 104.1388627  | 42.06475883     | 81.25295413     | 48.99911229     | 0.971186759      | 4.17505372    | 3.6205365 |
| B7LG70    | TY-2482_chromosome | +      | 14580          | 15236        | 113.6282442  | 113.6078911  | 117.5525441  | 97.2438516      | 93.722842       | 92.17436183     | 0.281981395      | 0.818533178   | 0.6509693 |
| B7LWV0    | TY-2482_chromosome | -      | 14742          | 14987        | 150.3213708  | 142.2849998  | 151.8904161  | 118.4078554     | 196.850786      | 109.7479767     | 0.079600866      | 0.108783183   | 0.0798654 |
| E1JE00    | TY-2482_chromosome | -      | 15109          | 15426        | 630.2806831  | 657.220432   | 722.498202   | 263.556811      | 274.744335      | 393.982281      | 1.188002825      | 6.562029929   | 5.8336333 |
| B7LG74    | TY-2482_chromosome | +      | 15260          | 15565        | 71.03050258  | 78.80243362  | 63.78009826  | 29.18601203     | 41.03536912     | 35.52941123     | 0.990692067      | 4.489250036   | 3.9094474 |
| B7LWU9    | TY-2482_chromosome | +      | 15334          | 16494        | 381.4322315  | 356.1340489  | 377.0063996  | 208.4895916     | 231.5208991     | 19.91284731     | 1.123036865      | 2.592960752   | 2.200082  |
| C8TW44    | TY-2482_chromosome | +      | 15402          | 16430        | 585.8810814  | 454.786229   | 476.4940501  | 331.6959693     | 287.4885028     | 349.7605784     | 0.690559032      | 2.691992814   | 2.2886429 |
| E3PN47    | TY-2482_chromosome | +      | 15519          | 15794        | 27.28728259  | 38.33988673  | 43.98912564  | 9.465975302     | 19.27201266     | 10.74882931     | 1.479571431      | 5.230977455   | 4.5890825 |
| B7LWU8    | TY-2482_chromosome | +      | 16494          | 17729        | 640.1712953  | 658.881743   | 585.4064668  | 402.9463051     | 261.2893488     | 12.00011781     | 1.204778487      | 2.316742076   | 1.9545001 |
| E9LLT7    | TY-2482_chromosome | -      | 16994          | 17278        | 69.43945915  | 83.61316646  | 67.80280027  | 30.16749504     | 41.13101778     | 19.0256296      | 1.184714719      | 5.874146202   | 5.1879284 |

|               |                    |   |       |       |             |             |             |              |             |             |              |             |           |
|---------------|--------------------|---|-------|-------|-------------|-------------|-------------|--------------|-------------|-------------|--------------|-------------|-----------|
| <b>C8UMV2</b> | TY-2482_chromosome | + | 17360 | 20038 | 34.82492317 | 60.74813824 | 38.00426578 | 129.2830578  | 130.2907868 | 56.25936776 | -1.487813267 | 4.475867362 | 3.8975088 |
| <b>C7S9Z5</b> | TY-2482_chromosome | - | 17506 | 18012 | 584.0393441 | 594.9112565 | 574.9891414 | 367.6339855  | 307.5856659 | 251.7755587 | 0.852923481  | 4.932398607 | 4.3156285 |
| <b>B7LWU7</b> | TY-2482_chromosome | + | 17629 | 18447 | 593.0288232 | 655.4544825 | 521.2302228 | 322.6092478  | 226.7484019 | 9.333900256 | 1.368119103  | 2.822085103 | 2.4020138 |
| <b>Q68JD7</b> | TY-2482_chromosome | - | 18071 | 18670 | 821.6447022 | 980.4872651 | 932.9530926 | 475.3111957  | 371.2339754 | 363.3936867 | 1.101524349  | 7.768581202 | 6.9665681 |
| <b>B7LWU6</b> | TY-2482_chromosome | + | 18443 | 19069 | 356.1016759 | 337.3741686 | 304.102373  | 154.8345443  | 110.235693  | 9.261221004 | 1.629870504  | 4.650441861 | 4.0566759 |
| <b>E6AXF5</b> | TY-2482_chromosome | - | 18628 | 18849 | 120.9387534 | 148.286552  | 134.6695495 | 66.26707035  | 49.09695402 | 41.22808388 | 1.257101451  | 9.184060256 | 8.2977693 |
| <b>C7S9Z7</b> | TY-2482_chromosome | + | 18933 | 20366 | 663.1534718 | 756.6713746 | 730.9097417 | 792.9129315  | 687.9513622 | 697.4082239 | -0.062069179 | 0.033241828 | 0.0226989 |
| <b>B7LWU5</b> | TY-2482_chromosome | + | 19089 | 20297 | 245.9718064 | 259.877864  | 249.5172868 | 96.71170493  | 103.1121234 | 14.46899043 | 1.647537221  | 6.547850643 | 5.8209788 |
| <b>D3QYQ9</b> | TY-2482_chromosome | + | 20378 | 20599 | 47.24219683 | 35.20509723 | 45.64921478 | 26.03826344  | 38.37796064 | 22.74286879 | 0.610988485  | 1.397926401 | 1.1469125 |
| <b>B7LFS5</b> | TY-2482_chromosome | + | 20550 | 21779 | 33.52408396 | 46.57317383 | 30.70265586 | 106.7741303  | 83.65676633 | 85.70122585 | -1.45925463  | 7.235471022 | 6.467105  |
| <b>P03008</b> | TY-2482_chromosome | - | 20860 | 23652 | 477.2504162 | 415.7174546 | 444.2983076 | 283.4189607  | 332.2097929 | 320.9624237 | 0.561413686  | 1.950449382 | 1.6281635 |
| <b>B7LBV5</b> | TY-2482_chromosome | + | 21275 | 22405 | 218.2180978 | 271.0856091 | 212.3237688 | 106.9689137  | 128.4339727 | 91.1765091  | 1.010044274  | 6.635597427 | 5.9015639 |
| <b>E1U309</b> | TY-2482_chromosome | + | 21915 | 22609 | 67.40730306 | 66.55127505 | 55.82719483 | 64.25626504  | 77.45436767 | 56.89454942 | 0.115958027  | 0.605598027 | 0.0850013 |
| <b>B7LFP0</b> | TY-2482_chromosome | - | 22521 | 24086 | 203.5242245 | 188.3473498 | 181.398241  | 171.5001577  | 166.5423115 | 154.1031975 | 0.205900266  | 0.583144302 | 0.4527154 |
| <b>Q9LA20</b> | TY-2482_chromosome | + | 22628 | 23468 | 69.62384192 | 51.23073986 | 74.90436309 | 54.1525325   | 51.00046227 | 35.99688692 | 0.508516065  | 1.299397229 | 1.0598422 |
| <b>A5JTS3</b> | TY-2482_chromosome | + | 23666 | 23995 | 1978.654583 | 2094.1806   | 2168.969189 | 3909.429897  | 3879.528495 | 4058.621795 | -0.918113478 | 2.012293531 | 1.6823458 |
| <b>Q6BBP7</b> | TY-2482_chromosome | - | 24048 | 24920 | 93030.98405 | 100199.3625 | 108173.0822 | 199027.4565  | 172937.0253 | 194105.7606 | -0.907862529 | 1.446923212 | 1.1893227 |
| <b>B7LA97</b> | TY-2482_chromosome | - | 24120 | 24467 | 130.2068734 | 116.6907841 | 123.4309486 | 75.83528235  | 115.7970227 | 68.88985341 | 0.522105795  | 1.676306324 | 1.3904244 |
| <b>B7LA98</b> | TY-2482_chromosome | - | 24467 | 24901 | 175.7757797 | 184.6324994 | 154.2027425 | 119.4635077  | 131.0985155 | 112.0271677 | 0.457966588  | 1.929078374 | 1.6095815 |
| <b>C6UQD7</b> | TY-2482_chromosome | + | 24997 | 25194 | 311.9406018 | 293.8724053 | 282.4233359 | 148.3758295  | 162.0429397 | 137.0475439 | 0.978065487  | 5.975359378 | 5.2844967 |
| <b>D9Z5B6</b> | TY-2482_chromosome | - | 25179 | 26441 | 5758.182153 | 6590.783538 | 6270.913179 | 6257.051624  | 6248.695818 | 1360.612363 | 0.242922121  | 0.449628216 | 0.3434634 |
| <b>B7LBW0</b> | TY-2482_chromosome | - | 25495 | 29586 | 10307.35998 | 10921.32163 | 10917.67142 | 3948.586252  | 3773.873609 | 5357.875001 | 1.341526177  | 3.005669391 | 2.5653841 |
| <b>D8AHZ6</b> | TY-2482_chromosome | + | 26082 | 27023 | 124.7591889 | 148.1050842 | 125.2794692 | 69.10542859  | 72.87996829 | 50.46113462 | 0.95698702   | 6.131136169 | 5.4308319 |
| <b>C7S9E2</b> | TY-2482_chromosome | - | 26623 | 26997 | 83.44524944 | 114.323063  | 101.7123831 | 87.55571667  | 128.4666182 | 98.83145828 | -0.108637865 | 0.14245597  | 0.1400788 |
| <b>B7LWU0</b> | TY-2482_chromosome | + | 26915 | 27556 | 247.210492  | 313.3776488 | 312.4766725 | 301.4833236  | 312.1871336 | 267.3259529 | -0.056376639 | 0.022669143 | 0.0152692 |
| <b>P59697</b> | TY-2482_chromosome | - | 27147 | 27603 | 56.54582703 | 93.73459517 | 55.01615565 | 5.330666949  | 18.42129182 | 9.372752444 | 2.512736431  | 13.72490327 | 12.630224 |
| <b>Q8FEA4</b> | TY-2482_chromosome | + | 27522 | 27758 | 49.97902318 | 38.17660717 | 19.60797233 | 8.579234231  | 26.68257857 | 10.88530711 | 1.192592463  | 2.954604167 | 2.5192733 |
| <b>C8UQP5</b> | TY-2482_chromosome | + | 27742 | 28599 | 6336.204581 | 7320.032055 | 7440.992343 | 28599.522103 | 3441.813063 | 3248.41394  | 1.013770168  | 2.231533211 | 1.8779687 |
| <b>D3GX03</b> | TY-2482_chromosome | - | 28757 | 29109 | 123.5658404 | 106.3522037 | 106.8010453 | 84.31449353  | 69.10050841 | 73.76099538 | 0.56245693   | 2.313789708 | 1.9524233 |
| <b>Q513K9</b> | TY-2482_chromosome | - | 29017 | 29682 | 165.2551907 | 160.1817437 | 169.0596671 | 128.4938699  | 121.8561858 | 166.6071376 | 0.299660083  | 0.656961788 | 0.5138887 |
| <b>C1J8J6</b> | TY-2482_chromosome | - | 29173 | 29796 | 1895.408986 | 2374.331739 | 2507.874243 | 865.056737   | 903.9395001 | 265.8446687 | 1.592910295  | 7.861147493 | 7.0512213 |
| <b>C1MF88</b> | TY-2482_chromosome | - | 29773 | 31311 | 567.5055224 | 605.1227271 | 599.5087368 | 783.1688531  | 619.530713  | 1196.149703 | -0.487868565 | 1.776954811 | 1.4777121 |
| <b>A7ZH69</b> | TY-2482_chromosome | - | 29898 | 30533 | 147.9232792 | 176.4612447 | 151.7165827 | 66.72226537  | 72.05554833 | 29.83933491 | 1.359498172  | 8.813757793 | 7.9446973 |
| <b>Q8Z1G9</b> | TY-2482_chromosome | - | 30003 | 31271 | 183.7810919 | 237.3538051 | 182.6168506 | 81.02259523  | 72.79456663 | 64.73519702 | 1.350338531  | 11.41763041 | 10.422927 |
| <b>B7LX00</b> | TY-2482_chromosome | + | 31115 | 31978 | 64.16515233 | 71.86989975 | 72.03650749 | 93.5131068   | 72.83898707 | 36.44386204 | -0.091479012 | 0.028365016 | 0.0190323 |
| <b>Q6EMF3</b> | TY-2482_chromosome | - | 31274 | 31708 | 95.74721818 | 79.05071064 | 103.9151892 | 57.8658092   | 55.50627724 | 52.75052099 | 0.797857998  | 3.305198342 | 2.8305441 |
| <b>A7MPV8</b> | TY-2482_chromosome | - | 31298 | 32932 | 559.3844617 | 538.8313331 | 562.5378924 | 1074.203071  | 843.4185474 | 1506.810497 | -0.974021923 | 5.784011023 | 5.1051233 |
| <b>C1J8J3</b> | TY-2482_chromosome | - | 31708 | 32115 | 89.05447921 | 87.44320292 | 79.69905129 | 38.79300237  | 35.45578076 | 38.14713735 | 1.169457375  | 6.732476052 | 5.9922085 |
| <b>B7LWZ9</b> | TY-2482_chromosome | - | 32281 | 32880 | 41.00566042 | 52.44616908 | 40.05886133 | 33.04309403  | 30.95831916 | 24.01007484 | 0.486293819  | 1.491732962 | 1.2285867 |
| <b>Q19NM8</b> | TY-2482_chromosome | - | 32935 | 33972 | 426.4185598 | 396.7467445 | 361.5433656 | 638.9250662  | 432.0292204 | 873.928043  | -0.670370816 | 2.608821921 | 2.213349  |
| <b>D3H5C8</b> | TY-2482_chromosome | + | 33211 | 33591 | 64.12249319 | 58.5443976  | 88.39648401 | 84.11323552  | 99.54193363 | 7.856671645 | 0.061656207  | 0.125704821 | 0.0925136 |
| <b>Q19NM7</b> | TY-2482_chromosome | - | 34060 | 34698 | 860.8949316 | 801.2636937 | 751.1282749 | 838.6920769  | 921.3824666 | 988.7797644 | 0.000874518  | 0.034822351 | 0.0237391 |
| <b>E1U309</b> | TY-2482_chromosome | - | 34255 | 34938 | 186.9110888 | 207.5934903 | 175.3931167 | 87.60744991  | 83.76019834 | 63.58425809 | 1.189792463  | 9.184915199 | 8.2978913 |
| <b>P75012</b> | TY-2482_chromosome | - | 34698 | 35333 | 1208.602373 | 1100.558684 | 1134.220032 | 1124.416167  | 836.1640857 | 1271.722957 | 0.125632737  | 0.17182911  | 0.1269588 |
| <b>D3H556</b> | TY-2482_chromosome | + | 34979 | 39662 | 422.389986  | 473.3220681 | 447.6118004 | 469.7623471  | 351.1314785 | 485.1798896 | 0.018886076  | 0.069201334 | 0.0496409 |
| <b>Q19NM5</b> | TY-2482_chromosome | - | 35359 | 36075 | 1020.016599 | 1088.883272 | 973.0055803 | 769.1138842  | 613.2398773 | 837.7101539 | 0.455491298  | 1.781872484 | 1.4812229 |
| <b>P75010</b> | TY-2482_chromosome | - | 36461 | 36925 | 274.514543  | 243.2605501 | 274.7379568 | 359.8984856  | 292.1904685 | 254.0618609 | 0.022763492  | 0.016105866 | 0.0104508 |
| <b>C6UQE2</b> | TY-2482_chromosome | - | 36946 | 38151 | 362.692681  | 353.2839836 | 365.7821767 | 267.5801442  | 316.7213323 | 328.7179587 | 0.286911872  | 0.643371041 | 0.5026709 |
| <b>C6UQE3</b> | TY-2482_chromosome | - | 38165 | 40233 | 483.2337238 | 385.780772  | 483.468473  | 295.1831663  | 325.7758467 | 377.2493972 | 0.541384088  | 1.453085325 | 1.1939322 |
| <b>D3H5D8</b> | TY-2482_chromosome | + | 38970 | 40931 | 62.73702326 | 62.36371097 | 69.46215534 | 64.57268638  | 39.85275528 | 71.89835228 | 0.174165318  | 0.249742223 | 0.1854517 |
| <b>C6UQE4</b> | TY-2482_chromosome | - | 40202 | 40972 | 118.9903236 | 94.63807441 | 123.0119532 | 70.30608173  | 89.15146753 | 120.3541178 | 0.415889259  | 0.671277888 | 0.5255493 |
| <b>B7LWY8</b> | TY-2482_chromosome | + | 40486 | 41043 | 443.2118249 | 537.4688423 | 519.0293533 | 429.6862108  | 370.3281868 | 399.9739672 | 0.279982511  | 0.940095693 | 0.7526283 |
| <b>C6UQE5</b> | TY-2482_chromosome | - | 40968 | 42107 | 106.5599715 | 83.21610867 | 75.53799871 | 55.73063352  | 59.89946758 | 127.5416234 | 0.270609553  | 0.182092792 | 0.1345766 |
| <b>B7LA98</b> | TY-2482_chromosome | + | 41272 | 41706 | 159.3545212 | 149.7695161 | 149.1203194 | 108.0227155  | 153.9743635 | 105.5983338 | 0.325155695  | 0.908564945 | 0.7259061 |
| <b>C1J8T1</b> | TY-2482_chromosome | + | 41420 | 42136 | 37.88043768 | 54.72262655 | 43.48920606 | 16.09074021  | 12.59208833 | 31.9790735  | 1.177453673  | 3.691185734 | 3.1748549 |
| <b>D3GV17</b> | TY-2482_chromosome | + | 41706 | 41999 | 85.23984496 | 85.11634058 | 84.46897459 | 58.36074372  | 76.61444594 | 43.9678942  | 0.478003175  | 1.556135902 | 1.2850691 |
| <b>B7LBX6</b> | TY-2482_chromosome | + | 41950 | 42261 | 93.32446007 | 100.5922115 | 107.7759603 | 45.97248039  | 58.40642911 | 30.86440134 | 1.118980705  | 6.087524314 | 5.3900742 |

|               |                    |   |       |       |             |             |             |             |             |             |              |             |           |
|---------------|--------------------|---|-------|-------|-------------|-------------|-------------|-------------|-------------|-------------|--------------|-------------|-----------|
| <b>C8UMS5</b> | TY-2482_chromosome | - | 42120 | 43184 | 90.86255395 | 65.77944064 | 67.06281608 | 55.63800425 | 62.81919683 | 60.51333947 | 0.371642037  | 0.803093708 | 0.6383201 |
| <b>C1J8T0</b> | TY-2482_chromosome | + | 42136 | 42729 | 47.74217379 | 53.69559654 | 51.50221227 | 22.38691669 | 29.99083937 | 45.31828701 | 0.722539405  | 1.815786212 | 1.510549  |
| <b>D3H551</b> | TY-2482_chromosome | - | 42321 | 43889 | 1656.5778   | 1494.672917 | 1529.677879 | 187.1612206 | 170.1129042 | 199.8065035 | 3.095468858  | 47.83293444 | 45.993133 |
| <b>C7SA25</b> | TY-2482_chromosome | + | 42804 | 43691 | 107.8925947 | 83.96320845 | 96.36067659 | 28.53850981 | 53.08428852 | 20.41011477 | 1.520222866  | 7.500555782 | 6.1791571 |
| <b>C8TNH3</b> | TY-2482_chromosome | + | 43498 | 44076 | 925.1610767 | 843.0193219 | 878.7317072 | 515.7656568 | 594.2512281 | 685.0641377 | 0.624363825  | 2.226629508 | 1.8737089 |
| <b>C8TX27</b> | TY-2482_chromosome | + | 44079 | 45233 | 1661.170694 | 1430.317752 | 1402.12436  | 919.1015698 | 919.9804238 | 1220.367321 | 0.615047518  | 2.041611921 | 1.7079871 |
| <b>C1J8S7</b> | TY-2482_chromosome | + | 44084 | 44854 | 145.0073168 | 159.0286877 | 143.8108455 | 60.28297149 | 111.1908566 | 95.88359898 | 0.780004296  | 3.028577734 | 2.585398  |
| <b>D3H553</b> | TY-2482_chromosome | - | 44259 | 44933 | 37.53722932 | 35.74266294 | 28.72836265 | 22.22227984 | 27.37595331 | 19.97001223 | 0.511435747  | 1.21992434  | 0.9909763 |
| <b>C1J8H1</b> | TY-2482_chromosome | + | 44858 | 45214 | 46.28457022 | 51.0800309  | 47.48175148 | 10.92770673 | 32.93011345 | 29.90351304 | 1.059233946  | 2.999198476 | 2.5596992 |
| <b>C8TX26</b> | TY-2482_chromosome | + | 45259 | 45711 | 735.5021579 | 540.200313  | 592.058722  | 606.6791501 | 534.0796594 | 749.4035434 | 0.067247621  | 0.024637419 | 0.0164728 |
| <b>C1J8S5</b> | TY-2482_chromosome | + | 45319 | 45780 | 92.37628862 | 136.7280813 | 111.5251063 | 61.68319059 | 65.5493446  | 59.32717825 | 0.77868478   | 4.000198118 | 3.4591172 |
| <b>POCE57</b> | TY-2482_chromosome | - | 45664 | 46644 | 248.1492672 | 297.2261732 | 244.0645788 | 187.5545286 | 127.2495259 | 174.8260013 | 0.613327262  | 2.832998587 | 2.4116991 |
| <b>C8TX25</b> | TY-2482_chromosome | + | 45737 | 46774 | 1996.188608 | 1621.710922 | 1812.319044 | 2326.574149 | 2045.657363 | 3052.906226 | -0.363059559 | 0.856931968 | 0.6823131 |
| <b>Q68J76</b> | TY-2482_chromosome | + | 45780 | 46691 | 1084.247912 | 1136.061673 | 1186.545945 | 1007.392908 | 1048.404714 | 961.8586668 | 0.17181646   | 0.41338806  | 0.3146663 |
| <b>C8TW70</b> | TY-2482_chromosome | + | 46723 | 46959 | 410.3887183 | 448.1690711 | 470.2377482 | 377.7950594 | 383.1898425 | 296.445014  | 0.294651958  | 0.934921451 | 0.748186  |
| <b>Q79RI5</b> | TY-2482_chromosome | + | 46922 | 47173 | 307.2991395 | 334.1424868 | 300.2596589 | 190.4896825 | 227.6723199 | 138.7690948 | 0.688350041  | 0.328851793 | 2.8513238 |
| <b>C1J8S2</b> | TY-2482_chromosome | - | 46996 | 47244 | 141.0981248 | 171.7613878 | 165.8033262 | 139.0613212 | 178.5214408 | 121.466848  | 0.081737227  | 0.243932588 | 1.808541  |
| <b>Q19NL2</b> | TY-2482_chromosome | + | 47268 | 48045 | 4053.273585 | 4005.638317 | 4059.109959 | 6703.692125 | 6734.341744 | 7638.242794 | -0.773542537 | 1.460898437 | 1.2007071 |
| <b>C8URD0</b> | TY-2482_chromosome | + | 47481 | 47666 | 389.8138239 | 360.5412341 | 314.5879317 | 116.2943609 | 205.0309198 | 126.6862252 | 1.250681055  | 7.292725502 | 6.5209972 |
| <b>C8URD0</b> | TY-2482_chromosome | + | 47629 | 48306 | 175.5884345 | 190.5820774 | 198.1909835 | 117.8461595 | 141.0810941 | 147.1582969 | 0.507643111  | 1.7444806   | 1.4511842 |
| <b>C8TX21</b> | TY-2482_chromosome | + | 48479 | 49717 | 585.6484253 | 518.7635701 | 565.1758741 | 329.2001998 | 382.1955729 | 465.2473833 | 0.58970073   | 1.828435692 | 1.5224292 |
| <b>D9Z504</b> | TY-2482_chromosome | - | 48762 | 49100 | 194.399393  | 195.9105722 | 198.0696375 | 98.76457838 | 175.0994721 | 71.8913662  | 0.741235146  | 2.682941471 | 2.2810344 |
| <b>B7LWY0</b> | TY-2482_chromosome | + | 49217 | 49498 | 478.0019945 | 430.7404963 | 429.0155188 | 282.3542536 | 294.879741  | 272.4568883 | 0.660981286  | 9.27287178  | 2.4947991 |
| <b>C7SA35</b> | TY-2482_chromosome | + | 49328 | 49657 | 421.6643407 | 468.1442561 | 436.3520515 | 243.0683446 | 233.8750651 | 225.094059  | 0.879671106  | 5.253836851 | 4.61027   |
| <b>B7LWX9</b> | TY-2482_chromosome | + | 49501 | 49773 | 406.0585876 | 374.6020034 | 434.6138953 | 329.5927854 | 327.5922695 | 351.177409  | 0.315289026  | 0.743815158 | 0.5877153 |
| <b>C8TW76</b> | TY-2482_chromosome | + | 49671 | 52367 | 1901.744028 | 1826.853948 | 1948.412054 | 1258.53601  | 964.5249246 | 1232.565278 | 0.72637393   | 3.256014256 | 2.7865903 |
| <b>D9Z536</b> | TY-2482_chromosome | + | 49782 | 50024 | 470.2352338 | 512.4524974 | 524.325645  | 362.4647601 | 370.3947667 | 361.8426272 | 0.456070672  | 1.634503896 | 1.3545239 |
| <b>B1VCJ6</b> | TY-2482_chromosome | - | 49986 | 50270 | 524.9362016 | 535.7923829 | 533.4529138 | 396.7318889 | 383.1230005 | 371.1157728 | 0.456114655  | 1.755990726 | 1.4608207 |
| <b>B7LWX4</b> | TY-2482_chromosome | + | 50759 | 51496 | 124.1304559 | 140.213303  | 107.9268009 | 95.71245593 | 101.9224835 | 106.4716763 | 0.245123536  | 0.781256873 | 0.61967   |
| <b>B7LWX3</b> | TY-2482_chromosome | - | 51781 | 52755 | 2752.670037 | 2877.382076 | 3043.150715 | 4062.829266 | 3247.883582 | 3612.726274 | -0.348508688 | 0.450412681 | 0.3438569 |
| <b>C8TPC9</b> | TY-2482_chromosome | + | 52317 | 53099 | 56.05077918 | 54.5762442  | 58.82471667 | 38.10974026 | 30.84465377 | 43.14695273 | 0.626279868  | 1.875326208 | 1.5638958 |
| <b>Q68J84</b> | TY-2482_chromosome | - | 52410 | 52958 | 396.3178132 | 429.3076814 | 373.4821224 | 229.2958785 | 232.0982488 | 196.3150513 | 0.807643316  | 4.609547673 | 4.0198701 |
| <b>C8CGL3</b> | TY-2482_chromosome | - | 53068 | 53553 | 67.35745447 | 69.01145101 | 58.50949459 | 18.84637629 | 46.60606682 | 37.97623789 | 0.965228253  | 3.095708327 | 2.6442662 |
| <b>B7L682</b> | TY-2482_chromosome | + | 53074 | 53435 | 200.3943002 | 234.9731395 | 169.8995906 | 106.9373904 | 107.3602475 | 116.9737895 | 0.801377444  | 4.572857353 | 3.9868634 |
| <b>D9Z540</b> | TY-2482_chromosome | + | 54052 | 54810 | 843.3186907 | 1016.503547 | 967.2945683 | 342.4158219 | 385.8394225 | 453.5040052 | 1.272244102  | 8.922184343 | 8.0450274 |
| <b>C6UQI7</b> | TY-2482_chromosome | + | 54456 | 56852 | 82.59635231 | 51.53231868 | 70.66895822 | 84.6483458  | 68.11527085 | 106.0475817 | -0.210252095 | 0.737988357 | 0.582161  |
| <b>D9Z502</b> | TY-2482_chromosome | - | 54694 | 55767 | 188.4622609 | 195.279367  | 174.7719731 | 60.72427818 | 75.5752281  | 74.87245209 | 1.408437197  | 11.32324508 | 10.331352 |
| <b>D8EV54</b> | TY-2482_chromosome | + | 54804 | 55199 | 89.9979987  | 82.05739723 | 63.56731642 | 49.94091163 | 50.98284377 | 44.90984455 | 0.645881973  | 2.472794741 | 2.0919741 |
| <b>B7LX17</b> | TY-2482_chromosome | + | 55269 | 55544 | 254.2865794 | 254.855052  | 238.8618852 | 204.534904  | 241.1821173 | 253.7098332 | 0.118626188  | 0.195988347 | 0.1447407 |
| <b>B7LX16</b> | TY-2482_chromosome | + | 55522 | 55851 | 361.3266441 | 320.2310981 | 334.0108292 | 316.1563207 | 420.5602357 | 350.0674204 | -0.058820629 | 0.192086111 | 0.1416595 |
| <b>C7SA39</b> | TY-2482_chromosome | - | 55783 | 56988 | 92.76791947 | 83.35811062 | 93.15274507 | 34.11493628 | 35.50407104 | 32.98174225 | 1.416073945  | 8.746574932 | 7.8824139 |
| <b>B7LX15</b> | TY-2482_chromosome | + | 55855 | 56658 | 453.5709401 | 339.0154052 | 354.3082859 | 450.965516  | 480.4997174 | 510.3186338 | -0.269641763 | 0.921618297 | 0.7364889 |
| <b>D3H584</b> | TY-2482_chromosome | + | 56807 | 57481 | 973.6584787 | 925.5474779 | 1030.099127 | 553.8228652 | 500.5017393 | 485.6310923 | 0.931915411  | 5.48387356  | 4.8262616 |
| <b>C6UZH6</b> | TY-2482_chromosome | + | 56852 | 57754 | 66.87435071 | 52.29750324 | 48.52646883 | 54.99276322 | 38.13142082 | 40.97755409 | 0.291585702  | 0.705910927 | 0.554556  |
| <b>C7SA40</b> | TY-2482_chromosome | - | 57346 | 58272 | 133.749861  | 151.1941447 | 137.2413858 | 87.74171508 | 81.19490657 | 11.78984138 | 1.022599657  | 3.290355222 | 2.817118  |
| <b>Q9Z4E6</b> | TY-2482_chromosome | + | 57571 | 57876 | 496.4996821 | 520.108853  | 505.0398144 | 216.6103241 | 230.259169  | 222.3734196 | 1.178398968  | 8.26086987  | 7.4184281 |
| <b>C6UZH7</b> | TY-2482_chromosome | + | 57754 | 58821 | 38.7875533  | 49.71220868 | 36.03844885 | 32.0053156  | 37.34837907 | 34.24638995 | 0.192028121  | 0.467523283 | 0.3576714 |
| <b>E9LLV1</b> | TY-2482_chromosome | + | 58239 | 59270 | 1912.826517 | 2063.133946 | 2112.844932 | 1438.412487 | 1382.383322 | 1209.343359 | 0.564781381  | 2.437242726 | 2.0609721 |
| <b>C7SA41</b> | TY-2482_chromosome | + | 58610 | 58891 | 18236.53084 | 14770.02476 | 11862.48199 | 4412.733247 | 14036.51052 | 3571.848219 | 1.013649374  | 1.483200083 | 1.2207509 |
| <b>B7L946</b> | TY-2482_chromosome | + | 58850 | 59638 | 53.01380943 | 58.73557266 | 54.07115789 | 56.80386856 | 64.79796674 | 24.58264772 | 0.069841187  | 0.245108052 | 0.1816993 |
| <b>Q3ZU22</b> | TY-2482_chromosome | + | 59266 | 59679 | 1060.367882 | 1099.805676 | 1091.360388 | 726.3278243 | 843.7432019 | 595.1409858 | 0.554957256  | 2.489571066 | 2.1067102 |
| <b>D8EU26</b> | TY-2482_chromosome | + | 59524 | 59817 | 28911.74535 | 25670.5484  | 21581.95634 | 12694.92086 | 32367.53686 | 10203.72727 | 0.437856533  | 0.495454254 | 0.3806727 |
| <b>C8TX14</b> | TY-2482_chromosome | - | 59657 | 60064 | 66.5087968  | 62.68456761 | 72.78473941 | 84.84471491 | 72.88341909 | 32.52490803 | 0.004633969  | 0.104255523 | 0.0768607 |
| <b>C1J8J5</b> | TY-2482_chromosome | + | 59687 | 60958 | 314.4879226 | 405.2178112 | 345.2019895 | 175.7918244 | 226.7467328 | 162.1862708 | 0.845445334  | 4.76414984  | 4.1590341 |
| <b>D8EDM2</b> | TY-2482_chromosome | - | 60067 | 60297 | 22.48531726 | 18.88988804 | 21.80177861 | 31.03812773 | 39.32927078 | 12.64239206 | -0.43703625  | 0.594372617 | 0.4620069 |
| <b>E9LLN8</b> | TY-2482_chromosome | - | 60554 | 61165 | 411.8184961 | 491.2247172 | 478.7580181 | 299.5577467 | 355.3050658 | 51.52979705 | 0.793927124  | 2.047029868 | 1.7125837 |
| <b>A1YLB7</b> | TY-2482_chromosome | - | 60961 | 61398 | 87.76033952 | 77.25585603 | 63.62493544 | 47.20985813 | 58.36165105 | 38.55967284 | 0.625350185  | 2.192726791 | 1.8436495 |

|        |                    |   |       |       |             |             |             |             |             |             |              |             |           |
|--------|--------------------|---|-------|-------|-------------|-------------|-------------|-------------|-------------|-------------|--------------|-------------|-----------|
| B3AEC6 | TY-2482_chromosome | - | 61244 | 63478 | 153.9036626 | 176.9657541 | 164.364211  | 67.51604896 | 62.87662788 | 32.36119905 | 1.486598343  | 11.16483932 | 10.180355 |
| Q5K5L6 | TY-2482_chromosome | - | 61445 | 62401 | 154.5826677 | 182.2836998 | 179.6793383 | 44.196443   | 62.87628906 | 57.8006003  | 1.663769824  | 13.89769766 | 12.793446 |
| P46004 | TY-2482_chromosome | + | 62882 | 63637 | 3062.014644 | 4243.006271 | 3787.812035 | 1468.412788 | 1401.76143  | 226.6043014 | 1.60268296   | 3.896562226 | 3.3646454 |
| E9TQB2 | TY-2482_chromosome | + | 63009 | 63588 | 43.71363985 | 33.98024169 | 28.6416408  | 26.17188009 | 34.71312143 | 20.1573397  | 0.367161623  | 0.727612107 | 0.5728732 |
| C7SA45 | TY-2482_chromosome | - | 63509 | 64090 | 84.4825661  | 89.64691251 | 80.3980492  | 52.86739029 | 39.04406077 | 44.79542082 | 0.842877159  | 4.089325017 | 3.5415995 |
| B7LX07 | TY-2482_chromosome | + | 63654 | 66179 | 7133.073563 | 11524.11361 | 10227.19628 | 5133.970206 | 4292.79428  | 2160.042582 | 1.119369736  | 2.755812684 | 2.3454207 |
| C7SA46 | TY-2482_chromosome | - | 64122 | 65321 | 129.4389326 | 119.0893753 | 123.4207394 | 113.0735818 | 85.40511436 | 123.3325294 | 0.235049138  | 0.521197972 | 0.4010539 |
| C8TNM7 | TY-2482_chromosome | + | 64373 | 65212 | 55.37275396 | 51.96114802 | 53.44109172 | 40.0503689  | 50.19560221 | 28.16365675 | 0.414228232  | 1.058808291 | 0.8533922 |
| D9Z526 | TY-2482_chromosome | - | 65291 | 65914 | 78.73681945 | 71.93929579 | 59.03309168 | 61.22311229 | 71.84673189 | 98.05486096 | -0.091479012 | 0.23180431  | 0.1719051 |
| B7LFE3 | TY-2482_chromosome | + | 65686 | 66621 | 1142.525458 | 1302.679214 | 1243.227463 | 1836.981709 | 1480.529754 | 1933.689571 | -0.52775017  | 1.833429194 | 1.5266519 |
| Q68JA2 | TY-2482_chromosome | - | 65905 | 68946 | 285.7555189 | 263.2914773 | 267.9809184 | 150.1292168 | 168.3696054 | 174.8434907 | 0.763707877  | 3.537670441 | 3.0399922 |
| B7LFE4 | TY-2482_chromosome | + | 66679 | 67413 | 1257.610273 | 1462.708007 | 1516.751125 | 2213.9675   | 1948.35959  | 2116.819682 | -0.585418802 | 2.253334691 | 1.8961034 |
| O87745 | TY-2482_chromosome | + | 66734 | 67234 | 14384.4294  | 16765.55071 | 17193.34848 | 11152.697   | 9816.05426  | 1680.383503 | 0.896107747  | 1.243646413 | 1.2346413 |
| E9XTW5 | TY-2482_chromosome | + | 67374 | 67691 | 437.4762507 | 467.9364308 | 401.1741234 | 99.81444437 | 93.85147362 | 41.74445443 | 2.331082616  | 21.77040461 | 20.445513 |
| B7LFE5 | TY-2482_chromosome | + | 67440 | 67991 | 938.3513667 | 1070.952058 | 1042.556208 | 1859.226653 | 1728.141492 | 1872.067599 | -0.859081389 | 4.390176342 | 3.8210888 |
| F2W481 | TY-2482_chromosome | - | 67666 | 67968 | 74.5349294  | 101.1223316 | 82.41694031 | 28.78656529 | 21.83398542 | 13.68495157 | 1.841337135  | 12.94861281 | 11.878099 |
| D3H139 | TY-2482_chromosome | + | 68048 | 68584 | 535.574462  | 452.1874327 | 517.684286  | 944.1933783 | 992.8570033 | 1048.425071 | -0.927806966 | 6.143018201 | 5.4408008 |
| Q8XC14 | TY-2482_chromosome | + | 68195 | 68752 | 39.54924519 | 41.34443088 | 42.97588847 | 32.12767887 | 29.0606262  | 36.63933115 | 0.358880899  | 0.749236049 | 0.5925906 |
| B7LFE7 | TY-2482_chromosome | - | 68654 | 69484 | 53.09990834 | 51.76432508 | 52.12089278 | 58.06166691 | 59.23664688 | 36.1117456  | -0.020712409 | 0.027332126 | 0.0182471 |
| B7L938 | TY-2482_chromosome | + | 68805 | 70340 | 302.1236093 | 298.9560579 | 297.7200689 | 154.6081962 | 168.3141113 | 211.3565598 | 0.799902925  | 3.608241951 | 3.101482  |
| C7SA49 | TY-2482_chromosome | - | 69039 | 69836 | 88.91056129 | 101.9626322 | 86.30938705 | 50.19600547 | 50.12487255 | 30.82735672 | 0.973669149  | 5.191456913 | 4.553714  |
| C7SA50 | TY-2482_chromosome | - | 69823 | 70008 | 24.45103447 | 30.59242696 | 31.86767728 | 18.24735188 | 26.5389407  | 13.58387444 | 0.53309219   | 1.1442861   | 0.927577  |
| C7SA51 | TY-2482_chromosome | - | 70075 | 70476 | 63.02007089 | 104.0136972 | 104.7109043 | 27.66322927 | 30.09735014 | 20.11199183 | 1.716769061  | 10.41346608 | 9.4650836 |
| E3Y4T4 | TY-2482_chromosome | + | 70481 | 70994 | 79.74502631 | 102.0373904 | 97.15236017 | 55.15297103 | 68.40064609 | 40.01606221 | 0.698402296  | 2.968673081 | 2.5315235 |
| C7SA52 | TY-2482_chromosome | - | 70530 | 71054 | 78.98701308 | 99.71116537 | 99.19766465 | 34.74479443 | 20.82871576 | 22.61141168 | 1.739926656  | 12.09719407 | 11.068276 |
| E9Z010 | TY-2482_chromosome | - | 70931 | 71380 | 112.1320827 | 113.4748809 | 114.8849746 | 48.27567206 | 49.2421238  | 25.68193562 | 1.393895366  | 9.285067005 | 8.3943595 |
| C7SA53 | TY-2482_chromosome | - | 71057 | 71758 | 153.222394  | 145.3434325 | 175.2271756 | 54.32952849 | 53.63970371 | 66.80421867 | 1.506945496  | 11.15432501 | 10.171673 |
| E9Z008 | TY-2482_chromosome | - | 71362 | 71859 | 55.14031076 | 72.95774597 | 58.6199728  | 24.41832826 | 14.51315201 | 8.45555015  | 1.784201254  | 10.54136814 | 9.5850133 |
| C7SA54 | TY-2482_chromosome | - | 71761 | 73047 | 162.2776173 | 159.9084943 | 160.4010435 | 85.66289009 | 56.25702178 | 86.54809199 | 1.077647754  | 6.449439456 | 5.7291136 |
| B7LFF2 | TY-2482_chromosome | + | 72246 | 72698 | 37.38625739 | 32.12605374 | 40.44038993 | 31.34878532 | 33.66214406 | 36.71086499 | 0.183666052  | 0.198371382 | 0.1462425 |
| B7LWW9 | TY-2482_chromosome | + | 72295 | 73320 | 1213.580743 | 1303.444048 | 1378.724885 | 1187.972366 | 969.4537285 | 42.36887835 | 0.600846418  | 0.943648495 | 0.7551542 |
| C7SA55 | TY-2482_chromosome | - | 73053 | 74033 | 72.38622113 | 79.77652627 | 82.64289012 | 60.57766456 | 65.4562722  | 0.481917906 | 1.427317204  | 1.1733179   |           |
| B7LWW8 | TY-2482_chromosome | + | 73327 | 73863 | 851.6002152 | 886.7498756 | 1032.929557 | 986.7712777 | 843.8677534 | 80.57952226 | 0.354670865  | 0.663935871 | 0.5195362 |
| B7LFF5 | TY-2482_chromosome | + | 73618 | 74148 | 310.3953737 | 266.8684663 | 325.0318794 | 255.6652367 | 308.5145813 | 344.3514974 | 0.089096224  | 0.008059962 | 0.0052916 |
| C7SA56 | TY-2482_chromosome | - | 74047 | 74736 | 77.33186616 | 53.43925339 | 63.95748198 | 34.82206979 | 26.26915235 | 41.71890367 | 1.008565471  | 3.608120431 | 3.101482  |
| B7LFF6 | TY-2482_chromosome | + | 74153 | 75571 | 426.0086914 | 539.4299901 | 479.2922141 | 464.2140718 | 459.5447982 | 499.8171293 | -0.01839544  | 0.033123291 | 0.0226989 |
| B1LJZ9 | TY-2482_chromosome | + | 74681 | 75328 | 175.3623633 | 125.4731604 | 139.1349059 | 112.3800181 | 90.89374844 | 120.7787919 | 0.503039535  | 1.506836418 | 1.241066  |
| C7SA57 | TY-2482_chromosome | - | 74736 | 75080 | 33.77376101 | 22.65703318 | 33.84133444 | 28.42312668 | 21.76644259 | 26.29254879 | 0.3183781    | 0.401588921 | 0.3048353 |
| C7SA58 | TY-2482_chromosome | - | 75101 | 78862 | 355.83546   | 413.5476056 | 361.6688782 | 131.755152  | 116.3508699 | 183.5059597 | 1.398459952  | 9.604728345 | 8.6989658 |
| B7LFF7 | TY-2482_chromosome | - | 75585 | 76739 | 87.10104632 | 72.29268461 | 58.27338348 | 116.2157071 | 107.3277883 | 124.828721  | -0.680854233 | 2.908740805 | 2.4784674 |
| B7LFG0 | TY-2482_chromosome | + | 77133 | 78665 | 1599.6697   | 1563.575275 | 1501.245065 | 4456.592922 | 3774.786706 | 4789.890868 | -1.475971424 | 4.338386419 | 3.7710593 |
| B7LFG1 | TY-2482_chromosome | + | 78661 | 81201 | 3120.947806 | 2666.839571 | 2674.430963 | 6981.431877 | 6813.481191 | 8597.141639 | -1.351091593 | 3.614864056 | 3.1075008 |
| E9LLQ3 | TY-2482_chromosome | - | 78955 | 79863 | 115.3575486 | 98.59403254 | 97.5283841  | 62.9880442  | 73.74938733 | 71.01024878 | 0.618805924  | 2.61277999  | 1.9933012 |
| C7SA62 | TY-2482_chromosome | - | 79808 | 80953 | 130.3235223 | 106.7442591 | 113.4496015 | 95.1696644  | 83.63226662 | 110.1952712 | 0.331245009  | 0.774401991 | 0.6136426 |
| Q68JB5 | TY-2482_chromosome | - | 80953 | 81768 | 80.92504851 | 63.36943996 | 75.29170704 | 64.39456479 | 50.84269749 | 73.33388359 | 0.289670066  | 0.504575052 | 0.3880548 |
| Q0TJ23 | TY-2482_chromosome | + | 81213 | 81435 | 336.0899148 | 296.1275345 | 241.1510991 | 286.4902646 | 460.7423322 | 287.2538224 | -0.258282985 | 0.537373369 | 0.4150909 |
| B7LFG2 | TY-2482_chromosome | + | 81377 | 81601 | 265.3200951 | 313.1095665 | 277.8610654 | 169.1927119 | 187.4781787 | 194.5871342 | 0.614695131  | 2.75660451  | 2.3457226 |
| B7LFG3 | TY-2482_chromosome | - | 81608 | 81979 | 380.4754844 | 444.6573976 | 407.9785118 | 219.2412795 | 225.6860799 | 231.5059836 | 0.83974759   | 4.690297424 | 4.0920271 |
| Q68JB6 | TY-2482_chromosome | - | 81768 | 82223 | 64.64131054 | 49.7894884  | 46.54604895 | 31.30239064 | 29.03215443 | 44.24147358 | 0.687037965  | 1.81306589  | 1.5082129 |
| B7LFG4 | TY-2482_chromosome | - | 82065 | 83288 | 180.6818579 | 242.8258632 | 207.2557873 | 92.6364099  | 83.66945628 | 94.64043037 | 1.154903213  | 8.39810947  | 7.5489964 |
| Q68JB8 | TY-2482_chromosome | - | 83265 | 84464 | 469.5315921 | 492.0705639 | 509.7871386 | 110.0290363 | 92.79569595 | 84.49560846 | 2.317175895  | 26.4122535  | 24.988436 |
| B7LFG5 | TY-2482_chromosome | - | 83463 | 84380 | 910.2389889 | 822.3319379 | 833.1123911 | 317.4501215 | 348.505319  | 434.9923146 | 1.285306883  | 8.182514769 | 7.3453372 |
| Q68JB9 | TY-2482_chromosome | - | 84553 | 85374 | 192.2386447 | 180.7998079 | 185.4860358 | 42.00531963 | 46.46611649 | 37.07958012 | 2.147782902  | 23.55325346 | 22.172661 |
| B7LFG6 | TY-2482_chromosome | + | 84605 | 85654 | 143.4863698 | 159.0614416 | 146.4923453 | 1004.789031 | 996.4996182 | 985.4495528 | -2.763074197 | 34.0392333  | 35.459069 |
| P10487 | TY-2482_chromosome | - | 85528 | 86679 | 87.99999428 | 116.7349302 | 97.62314832 | 22.63051464 | 33.77750527 | 26.4062385  | 1.820692591  | 12.95919848 | 11.885314 |
| B7L646 | TY-2482_chromosome | - | 85702 | 86274 | 220.5670484 | 241.2465924 | 209.092712  | 417.0085695 | 442.3284329 | 384.3762007 | -0.939062054 | 4.876728578 | 4.2623145 |
| B7LFF2 | TY-2482_chromosome | - | 86281 | 86844 | 63.50469959 | 62.36718012 | 68.77521325 | 106.6865171 | 135.6665846 | 124.9586584 | -0.871703916 | 5.044478622 | 4.4177517 |

|               |                    |   |        |        |             |             |             |             |             |             |              |             |           |
|---------------|--------------------|---|--------|--------|-------------|-------------|-------------|-------------|-------------|-------------|--------------|-------------|-----------|
| <b>B7LFZ3</b> | TY-2482_chromosome | - | 87269  | 88384  | 625.2175121 | 595.5091691 | 615.987911  | 1259.402142 | 1308.630504 | 1441.723358 | -1.092639712 | 8.109381548 | 7.2767584 |
| <b>B5YV70</b> | TY-2482_chromosome | - | 88502  | 88756  | 1277.228465 | 1344.385828 | 1318.472342 | 447.4021437 | 770.254899  | 382.2671514 | 1.278882948  | 7.730717047 | 6.9317094 |
| <b>B7LFZ5</b> | TY-2482_chromosome | - | 89046  | 89420  | 242.1889767 | 269.7684217 | 248.8315017 | 192.3141329 | 378.9100373 | 224.0676555 | -0.064984241 | 0.099849952 | 0.0731161 |
| <b>B7LFZ6</b> | TY-2482_chromosome | - | 89365  | 90408  | 482.4731478 | 440.9534216 | 436.2796692 | 963.8387528 | 977.3437625 | 1170.567786 | -1.154527955 | 8.409605857 | 7.5591461 |
| <b>B7LFZ7</b> | TY-2482_chromosome | - | 90517  | 91074  | 358.9495314 | 358.1530772 | 355.8240624 | 494.9588157 | 489.5445559 | 602.1997708 | -0.533905235 | 2.234438619 | 1.8800141 |
| <b>B7LFZ8</b> | TY-2482_chromosome | - | 91211  | 91855  | 1010.38163  | 1024.660182 | 899.6411035 | 891.6083095 | 749.7151196 | 1228.008835 | 0.059862178  | 0.056586533 | 0.0399032 |
| <b>B7LFZ9</b> | TY-2482_chromosome | - | 91922  | 93127  | 246.8486141 | 202.8152811 | 260.3778993 | 150.1682916 | 168.3812017 | 167.029217  | 0.629453054  | 2.170671146 | 1.822671  |
| <b>B7LG00</b> | TY-2482_chromosome | + | 93363  | 93944  | 577.2536938 | 585.022299  | 616.7471859 | 827.7373264 | 693.3907955 | 740.7649398 | -0.357562404 | 1.102639282 | 0.8912265 |
| <b>B7LG02</b> | TY-2482_chromosome | + | 94607  | 95527  | 644.7261772 | 605.6199845 | 590.1119109 | 1100.290147 | 854.4217885 | 1043.18937  | -0.713219426 | 3.391408147 | 2.9087471 |
| <b>B7LG03</b> | TY-2482_chromosome | + | 95640  | 97172  | 219.9289165 | 228.3647791 | 186.502534  | 283.048293  | 283.9382522 | 273.7345125 | -0.452060452 | 1.369788759 | 1.1227502 |
| <b>B7LG04</b> | TY-2482_chromosome | - | 97218  | 97631  | 293.1527805 | 310.8938158 | 267.8125762 | 273.8979896 | 247.4728473 | 280.1262941 | 0.088633248  | 0.261786632 | 0.1949508 |
| <b>B7LG05</b> | TY-2482_chromosome | - | 97639  | 97929  | 300.5914018 | 316.406383  | 293.6870786 | 252.1571819 | 239.2995971 | 264.337311  | 0.255570115  | 0.76801873  | 0.6086839 |
| <b>B7LG06</b> | TY-2482_chromosome | - | 98008  | 98664  | 80.58808662 | 106.0598949 | 80.29941671 | 175.8075101 | 164.6268713 | 221.8881917 | -1.121578941 | 6.35319134  | 5.6373402 |
| <b>B7LG07</b> | TY-2482_chromosome | + | 98819  | 99232  | 126.2872463 | 129.1336637 | 138.7694659 | 524.4502848 | 566.0348823 | 629.9380501 | -2.084601069 | 22.18932696 | 20.856317 |
| <b>B7LG08</b> | TY-2482_chromosome | + | 99239  | 99640  | 152.8786192 | 107.7147794 | 129.3503205 | 727.5955687 | 653.3261982 | 823.2705507 | -2.412738353 | 26.9736832  | 25.539602 |
| <b>B7LG09</b> | TY-2482_chromosome | + | 99655  | 100347 | 225.0279947 | 234.3387252 | 233.0628822 | 1386.108774 | 1340.420232 | 1754.567425 | -2.660640458 | 36.45636721 | 34.805622 |
| <b>B7LG10</b> | TY-2482_chromosome | + | 100375 | 101577 | 379.9435827 | 358.5391491 | 368.3773679 | 2563.598013 | 2123.876437 | 3659.162778 | -2.842122089 | 33.76889497 | 32.195909 |
| <b>B7LG11</b> | TY-2482_chromosome | + | 101600 | 102352 | 188.5583349 | 163.3762901 | 180.2544465 | 1286.325599 | 1023.615299 | 1789.696255 | -2.85605793  | 34.85303073 | 33.231112 |
| <b>B7LG12</b> | TY-2482_chromosome | + | 102527 | 103306 | 165.5141279 | 149.3055453 | 125.0351868 | 1265.230106 | 1097.359893 | 1792.373073 | -3.198591603 | 40.8144194  | 39.074152 |
| <b>B7LG13</b> | TY-2482_chromosome | + | 103362 | 104057 | 57.55850094 | 59.14300158 | 56.71259071 | 463.2542525 | 410.2595704 | 722.6075928 | -3.134687783 | 33.48293048 | 31.917007 |
| <b>B7LG14</b> | TY-2482_chromosome | + | 104072 | 105166 | 75.05079407 | 46.55596717 | 69.47418433 | 538.2680968 | 519.5510829 | 690.2156318 | -3.046349046 | 37.74141303 | 36.055195 |
| <b>B7LG15</b> | TY-2482_chromosome | + | 105169 | 106107 | 58.34103123 | 56.88484048 | 56.72822399 | 383.188822  | 432.2704444 | 475.9936879 | -2.870174707 | 36.56430186 | 34.904956 |
| <b>B7LG16</b> | TY-2482_chromosome | + | 106176 | 107816 | 765.8583572 | 703.8837754 | 733.4881264 | 1552.458135 | 1384.095305 | 1741.575862 | -1.051375038 | 6.646817242 | 5.9112336 |
| <b>B7LG17</b> | TY-2482_chromosome | + | 107831 | 108781 | 525.7524464 | 525.3471851 | 495.6982824 | 1151.080121 | 1171.207185 | 1293.075021 | -1.216986275 | 9.689261252 | 8.7781036 |
| <b>B7LG18</b> | TY-2482_chromosome | - | 108984 | 112166 | 7454.610332 | 6453.458589 | 6844.595041 | 10704.94172 | 10713.94704 | 14576.42755 | -0.71587085  | 1.350654483 | 1.1062822 |
| <b>C8TPF5</b> | TY-2482_chromosome | + | 112301 | 112618 | 1252.624143 | 1330.875568 | 1149.881738 | 520.0335287 | 978.6175178 | 606.8791959 | 0.817938026  | 3.598058645 | 3.0923186 |
| <b>B7LG19</b> | TY-2482_chromosome | + | 112739 | 113695 | 400.8651804 | 374.2293803 | 402.1239946 | 675.8403254 | 666.1646418 | 619.8200159 | -0.729137258 | 3.666453608 | 3.1541656 |
| <b>B5YVV6</b> | TY-2482_chromosome | - | 113813 | 114433 | 526.4594779 | 513.0431138 | 538.1298203 | 495.312841  | 740.0521322 | 559.3344345 | -0.152470913 | 0.409024807 | 0.3107806 |
| <b>sraB</b>   | TY-2482_chromosome | + | 114388 | 114556 | 2584.663041 | 2628.832624 | 2041.632102 | 1042.247204 | 1835.883424 | 1092.446193 | 0.833042916  | 2.690707485 | 2.2878391 |
| <b>B7LG21</b> | TY-2482_chromosome | + | 114593 | 115111 | 14327.16822 | 13379.29666 | 13586.24627 | 10566.90466 | 15726.80791 | 11067.27899 | 0.166447648  | 0.14191211  | 0.1037428 |
| <b>B7LG23</b> | TY-2482_chromosome | + | 115420 | 116487 | 3325.592433 | 3320.541804 | 3451.755014 | 4833.992384 | 5737.062941 | 4635.169087 | -0.586896533 | 0.964545253 | 0.7723636 |
| <b>B7LG24</b> | TY-2482_chromosome | + | 116558 | 117508 | 3627.534897 | 4192.966992 | 4241.484412 | 8037.189017 | 6281.953028 | 8246.031167 | -0.915900048 | 1.728220912 | 1.4377198 |
| <b>B7LG25</b> | TY-2482_chromosome | + | 117527 | 118453 | 5737.235465 | 6218.122611 | 6663.282554 | 12298.19341 | 8909.255831 | 11653.56492 | -0.827524002 | 1.434815979 | 1.1794483 |
| <b>B7LG26</b> | TY-2482_chromosome | + | 118469 | 119200 | 13731.10283 | 12998.11359 | 13501.13439 | 18865.30805 | 17254.5578  | 16462.48063 | -0.395243204 | 0.469652887 | 0.3594332 |
| <b>Q1RD63</b> | TY-2482_chromosome | - | 119363 | 119735 | 22826.3686  | 21395.12258 | 21268.70147 | 18966.44652 | 29893.65322 | 17666.64141 | -0.019494753 | 0.019064876 | 0.0127387 |
| <b>B7LG28</b> | TY-2482_chromosome | + | 119738 | 120976 | 9609.776071 | 8835.895752 | 9539.7724   | 18522.23112 | 17970.74864 | 19720.9471  | -0.972673492 | 1.89301618  | 1.5782593 |
| <b>B7LG29</b> | TY-2482_chromosome | + | 121099 | 121905 | 212.1901152 | 239.3064861 | 245.7417407 | 310.1173789 | 288.4682446 | 279.0561981 | -0.356581002 | 1.023018732 | 0.8220087 |
| <b>B7LG30</b> | TY-2482_chromosome | + | 121911 | 122930 | 323.9147774 | 316.5305763 | 279.0037516 | 302.576737  | 344.9636756 | 309.2745061 | -0.073217898 | 0.108551121 | 0.0798367 |
| <b>B7LG31</b> | TY-2482_chromosome | + | 122923 | 123561 | 424.1478706 | 361.8869981 | 404.7488888 | 459.5376757 | 495.9905392 | 494.6353763 | -0.234585878 | 0.785290071 | 0.6231806 |
| <b>B7LG32</b> | TY-2482_chromosome | + | 123561 | 124562 | 596.8690945 | 516.4496863 | 585.6968542 | 644.5342665 | 698.8780151 | 852.0904914 | -0.285513359 | 1.134781884 | 0.9191685 |
| <b>B7LG33</b> | TY-2482_chromosome | + | 124576 | 125370 | 872.1443244 | 803.7927293 | 736.5527106 | 691.9562702 | 702.5095428 | 839.0394699 | 0.135882941  | 0.243661816 | 0.1806933 |
| <b>B7LG34</b> | TY-2482_chromosome | + | 125668 | 127098 | 20171.54891 | 17972.47443 | 19515.89963 | 10580.07368 | 8697.270363 | 10048.61529 | 0.992936925  | 1.783300702 | 1.4824547 |
| <b>B7LG35</b> | TY-2482_chromosome | - | 127164 | 129350 | 162.4571    | 158.9496657 | 123.6692118 | 113.0139421 | 62.64471041 | 66.20413498 | 0.748575667  | 3.732535627 | 3.2124392 |
| <b>B7LG36</b> | TY-2482_chromosome | + | 129684 | 130040 | 1021.600242 | 925.6927633 | 1016.817827 | 1129.419345 | 1198.544173 | 1205.066165 | -0.214129896 | 0.669608708 | 0.5242793 |
| <b>B7LG37</b> | TY-2482_chromosome | + | 130046 | 130420 | 1010.678516 | 766.6606738 | 820.490127  | 1249.046498 | 1232.187401 | 1287.944812 | -0.489038105 | 2.016811823 | 1.6860496 |
| <b>B7LG38</b> | TY-2482_chromosome | + | 130437 | 131075 | 1267.840461 | 1041.778485 | 1073.372799 | 1671.955539 | 1445.953272 | 1966.422032 | -0.534145021 | 2.252408303 | 1.89561   |
| <b>B7LG39</b> | TY-2482_chromosome | + | 131059 | 131880 | 637.8595009 | 659.2622882 | 640.3755623 | 900.3031455 | 781.6190097 | 1056.029515 | -0.483087275 | 1.930110106 | 1.6102159 |
| <b>B7LG40</b> | TY-2482_chromosome | + | 131894 | 132916 | 1194.836509 | 1369.848865 | 1367.44645  | 2320.20047  | 2082.115665 | 2519.173595 | -0.819098457 | 3.574867691 | 3.0735828 |
| <b>B7LG41</b> | TY-2482_chromosome | + | 132942 | 133481 | 1724.335754 | 1964.725007 | 1898.864965 | 1450.064853 | 1410.562175 | 1427.472213 | 0.357479269  | 1.22666359  | 0.9969088 |
| <b>B7LG42</b> | TY-2482_chromosome | + | 133892 | 135193 | 2543.157013 | 2997.595951 | 2968.526422 | 11001.55646 | 9286.063552 | 11507.46996 | -1.916554328 | 5.816505874 | 5.1348838 |
| <b>B7LG43</b> | TY-2482_chromosome | + | 135406 | 135942 | 89.65002333 | 111.2775755 | 80.85465926 | 234.539277  | 221.1217835 | 219.7951907 | -1.3557066   | 8.810296794 | 7.9419396 |
| <b>D3H1S7</b> | TY-2482_chromosome | - | 136010 | 136717 | 312.5720702 | 344.0122154 | 284.2770955 | 185.9990001 | 250.3355196 | 243.2228656 | 0.463472911  | 1.618491643 | 1.3409828 |
| <b>B7LG45</b> | TY-2482_chromosome | + | 136880 | 137134 | 118.816209  | 116.6569559 | 133.5623297 | 19.83664069 | 28.2189415  | 35.0718974  | 2.24805848   | 18.84043223 | 17.58592  |
| <b>B7LG47</b> | TY-2482_chromosome | - | 137223 | 138182 | 206.519306  | 183.642902  | 190.069292  | 142.6172232 | 175.6250037 | 215.2397044 | 0.204829995  | 0.255542747 | 0.1901474 |
| <b>B7LG48</b> | TY-2482_chromosome | - | 138329 | 141772 | 1524.077885 | 1593.915003 | 1448.386208 | 2851.543211 | 2530.775011 | 2981.017556 | -0.89093565  | 2.335024701 | 1.9709032 |
| <b>B7LG50</b> | TY-2482_chromosome | + | 143235 | 144431 | 662.6161248 | 626.475935  | 651.6439964 | 1108.38147  | 1193.999376 | 1193.223458 | -0.822928963 | 5.037817261 | 4.4114931 |
| <b>B7LG51</b> | TY-2482_chromosome | + | 144427 | 145125 | 530.9086079 | 530.9714923 | 557.9664393 | 1153.803092 | 1079.255656 | 1270.667906 | -1.08857834  | 8.03615461  | 7.2131331 |

|               |                    |   |        |        |             |             |             |             |             |             |              |             |            |
|---------------|--------------------|---|--------|--------|-------------|-------------|-------------|-------------|-------------|-------------|--------------|-------------|------------|
| <b>B7LG52</b> | TY-2482_chromosome | + | 145128 | 146369 | 1149.36117  | 1195.072868 | 1179.162882 | 1570.001028 | 1598.913322 | 1888.914311 | -0.498496135 | 1.956453683 | 1.6331673  |
| <b>B7LG53</b> | TY-2482_chromosome | + | 146401 | 147309 | 1331.09661  | 1316.737764 | 1411.681206 | 1836.809915 | 1783.665205 | 1933.857762 | -0.429815594 | 1.616600581 | 1.3395984  |
| <b>B7LG54</b> | TY-2482_chromosome | + | 147328 | 148146 | 1087.189169 | 1103.315088 | 1310.904808 | 1878.838612 | 1904.73443  | 1901.080967 | -0.664877842 | 3.206944961 | 2.7440519  |
| <b>D6HVG4</b> | TY-2482_chromosome | - | 148291 | 149534 | 145.8865972 | 172.4989634 | 105.6425953 | 86.46643972 | 63.61583158 | 68.57168759 | 0.806023905  | 4.431098457 | 3.8584685  |
| <b>B7LG57</b> | TY-2482_chromosome | - | 149595 | 150638 | 3251.782023 | 2688.038775 | 3011.329626 | 2643.454431 | 2439.819426 | 2441.87994  | 0.278751246  | 0.320814173 | 0.2411378  |
| <b>B7LG58</b> | TY-2482_chromosome | - | 150638 | 151429 | 543.6255031 | 553.8883507 | 558.564752  | 615.131661  | 664.3365999 | 697.1446443 | -0.235438254 | 0.687750889 | 0.5396531  |
| <b>D3H1U1</b> | TY-2482_chromosome | - | 151429 | 152283 | 252.0401341 | 267.0095915 | 224.1950487 | 441.6089128 | 504.1653373 | 558.8522527 | -1.018870192 | 5.927004817 | 5.2380061  |
| <b>B7LG60</b> | TY-2482_chromosome | - | 152270 | 153403 | 349.1785707 | 350.6442751 | 368.481532  | 842.6638072 | 778.9658645 | 813.0715644 | -1.18584077  | 8.136731899 | 7.3026274  |
| <b>B7LG61</b> | TY-2482_chromosome | - | 153385 | 153633 | 91.96790634 | 74.25336648 | 106.6916067 | 109.6702788 | 111.9497765 | 104.0579879 | -0.180221788 | 0.624770628 | 0.4875578  |
| <b>B7LGW6</b> | TY-2482_chromosome | + | 153611 | 154879 | 2411.658327 | 2503.961832 | 2672.77096  | 783.5109861 | 770.8105577 | 744.7402164 | 1.72330402   | 16.01441175 | 14.83794   |
| <b>B7LQG6</b> | TY-2482_chromosome | - | 155031 | 156149 | 1613.055801 | 1579.459389 | 1672.438808 | 2899.597252 | 2619.088058 | 2685.24575  | -0.753939473 | 1.712410489 | 1.4231126  |
| <b>B7LQG7</b> | TY-2482_chromosome | - | 156228 | 157685 | 1654.858735 | 1769.363971 | 1750.297986 | 1165.674666 | 1125.703611 | 1187.960417 | 0.565425032  | 2.322692527 | 1.9597927  |
| <b>B7LQG8</b> | TY-2482_chromosome | - | 157688 | 158356 | 1535.945951 | 1717.24859  | 1565.314659 | 1310.656542 | 1383.275013 | 1433.931035 | 0.56427501   | 0.564279162 | 0.4367955  |
| <b>B7LQG9</b> | TY-2482_chromosome | - | 158527 | 159894 | 1445.054153 | 1285.596552 | 1164.328721 | 2914.40517  | 2365.961958 | 3817.203386 | -1.18280781  | 3.668722643 | 3.1548842  |
| <b>D3H1U9</b> | TY-2482_chromosome | - | 159901 | 160545 | 486.4252731 | 372.4612227 | 395.9580881 | 878.4868768 | 802.5497661 | 1132.191297 | -1.082314351 | 7.229978307 | 6.4621701  |
| <b>B7LGR1</b> | TY-2482_chromosome | - | 160578 | 161681 | 960.5257183 | 763.7485837 | 790.1060892 | 2209.132392 | 2114.903338 | 2450.780343 | -1.381342074 | 10.08326752 | 10.10335   |
| <b>B7LGR2</b> | TY-2482_chromosome | - | 161738 | 162196 | 273.1193445 | 230.4233176 | 250.1848334 | 314.8793291 | 345.7919376 | 406.1687946 | -0.42705781  | 1.766308223 | 1.4688792  |
| <b>B7LGR3</b> | TY-2482_chromosome | - | 162209 | 162859 | 312.6132798 | 319.0367806 | 290.3223112 | 245.398852  | 253.8711335 | 290.5049947 | 0.229747851  | 0.564387099 | 0.4367955  |
| <b>Q1RD17</b> | TY-2482_chromosome | - | 162950 | 164128 | 25378.53484 | 26523.37935 | 28150.57    | 33949.62971 | 28155.08211 | 32902.12998 | -0.247590362 | 0.259620736 | 0.1932287  |
| <b>B7LGR5</b> | TY-2482_chromosome | - | 164387 | 164707 | 112.2396224 | 110.5763972 | 100.1530394 | 30.11737523 | 50.38301288 | 11.44126557 | 1.721635342  | 9.043040309 | 8.1647343  |
| <b>B7LGR7</b> | TY-2482_chromosome | - | 166031 | 166759 | 396.8981573 | 450.4372418 | 458.3292935 | 375.6304016 | 385.8781488 | 360.5990328 | 0.202280539  | 0.545408515 | 0.420977   |
| <b>B7LGR8</b> | TY-2482_chromosome | - | 166967 | 168175 | 112.1508325 | 127.3838425 | 99.37270317 | 272.7932425 | 290.4264667 | 180.92425   | -1.248899185 | 6.37136277  | 5.6545212  |
| <b>D3H1W3</b> | TY-2482_chromosome | + | 171647 | 171898 | 102.022001  | 92.17748699 | 66.76558071 | 13.12477898 | 32.06057881 | 21.12982017 | 1.986007395  | 11.48787225 | 10.490339  |
| <b>B7LGS8</b> | TY-2482_chromosome | + | 172627 | 174945 | 29.40473777 | 27.62874927 | 17.996676   | 25.68568379 | 24.56832413 | 22.50722989 | -0.027830603 | 0.023577365 | 0.10157036 |
| <b>B7LGS9</b> | TY-2482_chromosome | - | 175008 | 175334 | 752.2150454 | 765.4829285 | 837.3449939 | 456.8610333 | 448.7533134 | 277.0427926 | 0.940559198  | 4.987659564 | 4.3657404  |
| <b>B7LGT0</b> | TY-2482_chromosome | - | 175347 | 175688 | 714.0060246 | 762.7284186 | 838.0634495 | 350.2837784 | 365.0313169 | 242.6971688 | 1.23403429   | 8.359181231 | 7.5134166  |
| <b>B7LGT2</b> | TY-2482_chromosome | - | 176983 | 177246 | 989.3759939 | 940.9220521 | 1028.743263 | 2327.564897 | 2161.347233 | 2145.875218 | -1.156033548 | 8.087462581 | 7.2574207  |
| <b>B7LGT3</b> | TY-2482_chromosome | - | 177253 | 178062 | 3364.453089 | 3361.912544 | 3618.866019 | 6913.593319 | 6017.212691 | 6117.735272 | -0.887459042 | 1.732800413 | 1.4413695  |
| <b>B7LGT4</b> | TY-2482_chromosome | - | 178089 | 178781 | 1939.827767 | 2021.86615  | 1981.997955 | 1804.624814 | 1857.422716 | 1805.075913 | 0.112333675  | 0.193684387 | 0.1429626  |
| <b>B7LGT5</b> | TY-2482_chromosome | + | 179301 | 179666 | 176.2057918 | 223.0048577 | 211.3599735 | 235.977989  | 266.8088491 | 148.1305303 | -0.186967025 | 0.167396625 | 0.1230536  |
| <b>B7LGT6</b> | TY-2482_chromosome | - | 179792 | 180190 | 830.2908334 | 742.2345691 | 699.6015163 | 538.4022749 | 548.010249  | 266.7678608 | 0.660458699  | 2.66337351  | 2.2626652  |
| <b>D3QQU1</b> | TY-2482_chromosome | + | 180219 | 180417 | 19.88919706 | 29.81342582 | 27.87519332 | 40.68423442 | 45.56111203 | 35.77378774 | -0.715667791 | 1.762908021 | 1.4664217  |
| <b>B7LGT7</b> | TY-2482_chromosome | + | 180399 | 180722 | 345.2086171 | 416.7830516 | 431.3510646 | 471.5681923 | 475.0628896 | 435.6385107 | -0.237162602 | 0.514730766 | 0.3959648  |
| <b>B7LGT8</b> | TY-2482_chromosome | + | 180797 | 181453 | 814.3476364 | 796.5190692 | 863.6963846 | 1292.601138 | 1154.810365 | 1194.648123 | -0.553448549 | 2.232357051 | 1.8785777  |
| <b>D8BP59</b> | TY-2482_chromosome | + | 181470 | 181991 | 293.2036136 | 283.4750824 | 273.8744337 | 354.6979678 | 338.5210124 | 336.8735549 | -0.287256989 | 0.777662653 | 0.6166276  |
| <b>B7LGU3</b> | TY-2482_chromosome | + | 183484 | 183900 | 86.99297731 | 74.99280082 | 66.34839373 | 65.75714921 | 61.86674088 | 60.61864492 | 0.262481347  | 0.682733409 | 0.5355383  |
| <b>B7LGU4</b> | TY-2482_chromosome | + | 183903 | 185168 | 136.6377348 | 166.4100389 | 153.8414714 | 122.0174581 | 132.8919845 | 126.3394325 | 0.230019409  | 0.708335301 | 0.5567106  |
| <b>B5YXK9</b> | TY-2482_chromosome | - | 185220 | 185753 | 260.9094343 | 287.7576345 | 260.6739009 | 205.1626977 | 238.4318007 | 266.7636977 | 0.199499647  | 0.444022695 | 0.3390451  |
| <b>B7LGU6</b> | TY-2482_chromosome | - | 185896 | 187434 | 811.7078759 | 612.35039   | 697.1362315 | 926.3680704 | 950.9509784 | 1156.054312 | -0.426179928 | 1.994629114 | 1.6672529  |
| <b>B7LGU7</b> | TY-2482_chromosome | + | 187656 | 188372 | 980.2410832 | 1091.826029 | 1098.057897 | 1701.571528 | 1790.111368 | 1572.370964 | -0.697868625 | 2.989779819 | 2.5508038  |
| <b>B7LGU8</b> | TY-2482_chromosome | - | 188430 | 189959 | 1437.302532 | 1401.845732 | 1517.984809 | 899.782089  | 798.9545855 | 915.5564781 | 0.756367644  | 3.513157357 | 3.017867   |
| <b>B7LGU9</b> | TY-2482_chromosome | + | 190289 | 191584 | 700.529408  | 757.5220088 | 831.4711488 | 317.3334705 | 358.5005547 | 482.1737688 | 1.061566037  | 5.093061271 | 4.4639104  |
| <b>B7LGV0</b> | TY-2482_chromosome | + | 191597 | 192664 | 803.2282983 | 793.2220371 | 737.9657952 | 235.558134  | 219.2224194 | 300.7858098 | 1.653901114  | 0.762882755 | 1.5365508  |
| <b>B7LGV1</b> | TY-2482_chromosome | - | 193056 | 194789 | 1919.098969 | 1705.923018 | 1731.017961 | 1175.998595 | 1225.818338 | 1341.746358 | 0.554238762  | 1.959794963 | 1.6361078  |
| <b>B7LGV2</b> | TY-2482_chromosome | - | 194887 | 195798 | 256.4047334 | 240.9029172 | 302.7400286 | 280.0894426 | 312.1352667 | 350.9854612 | -0.152309446 | 0.583516263 | 0.4529588  |
| <b>A1YN12</b> | TY-2482_chromosome | + | 195784 | 196506 | 176.403334  | 178.1470112 | 192.2493372 | 284.1813982 | 315.8188632 | 301.2945759 | -0.697594745 | 3.507916336 | 3.0135181  |
| <b>B7LGV4</b> | TY-2482_chromosome | - | 196514 | 197245 | 84.71833208 | 68.078083   | 71.82902451 | 136.4153042 | 148.3480554 | 149.9204401 | -0.905261309 | 5.443704873 | 4.7886806  |
| <b>A7ZKW7</b> | TY-2482_chromosome | - | 197503 | 197769 | 46.92065564 | 56.13320745 | 54.87926649 | 16.27564817 | 23.80102395 | 12.24235203 | 1.543119641  | 7.716435044 | 6.918026   |
| <b>B7LGV7</b> | TY-2482_chromosome | - | 198400 | 200094 | 326.7222689 | 364.815694  | 320.0461263 | 697.2309122 | 643.2973388 | 892.7752382 | -1.140204037 | 7.121841344 | 6.3595727  |
| <b>B7LGV8</b> | TY-2482_chromosome | - | 200417 | 201832 | 1733.669046 | 1479.583138 | 1556.743495 | 2876.80117  | 3161.505249 | 3524.263812 | -0.942911623 | 2.369735381 | 2.0008696  |
| <b>B7LGV9</b> | TY-2482_chromosome | - | 201846 | 202475 | 1448.517221 | 1373.882358 | 1574.191175 | 1120.178291 | 1085.618242 | 1358.657573 | 0.36560997   | 0.839461334 | 0.6674738  |
| <b>B7LW0</b>  | TY-2482_chromosome | - | 202489 | 203556 | 2618.865259 | 2699.460253 | 2706.309088 | 1074.958839 | 1046.513046 | 1185.188546 | 1.291355762  | 6.13939992  | 5.4376616  |
| <b>B7LW1</b>  | TY-2482_chromosome | + | 203784 | 205700 | 312.6140145 | 279.4481366 | 327.6399479 | 189.7273571 | 171.0036551 | 216.7779794 | 0.732241772  | 3.055100196 | 2.6092723  |
| <b>B7LW2</b>  | TY-2482_chromosome | - | 205806 | 208670 | 152.6005206 | 154.1857952 | 137.7786441 | 152.8526427 | 124.6946673 | 106.9805089 | 0.133562954  | 0.494264734 | 0.379731   |
| <b>B7LW3</b>  | TY-2482_chromosome | - | 209442 | 210530 | 1554.812678 | 1445.672361 | 1505.97442  | 3406.24453  | 3664.783005 | 3745.474627 | -1.231564771 | 3.43165343  | 2.9440342  |
| <b>B7LW4</b>  | TY-2482_chromosome | - | 210650 | 211231 | 175.6679016 | 199.7301689 | 167.4779125 | 334.7758995 | 368.6029949 | 347.370205  | -0.994112976 | 5.565656889 | 4.9045706  |
| <b>B7LW5</b>  | TY-2482_chromosome | + | 211509 | 211784 | 799.1531761 | 975.4527761 | 968.0506048 | 702.2946618 | 1072.298143 | 646.509569  | 0.151058397  | 0.391509859 | 0.2966714  |

|               |                    |   |        |        |             |             |             |             |             |             |              |             |           |
|---------------|--------------------|---|--------|--------|-------------|-------------|-------------|-------------|-------------|-------------|--------------|-------------|-----------|
| <b>B7LGW7</b> | TY-2482_chromosome | - | 211845 | 213521 | 587.9056098 | 579.1314661 | 500.8098783 | 916.5038761 | 949.1335167 | 1150.788519 | -0.843015844 | 4.767582828 | 4.1620836 |
| <b>B7LGW8</b> | TY-2482_chromosome | - | 213649 | 214593 | 5750.350299 | 4936.076667 | 4905.351814 | 7703.212228 | 7633.458346 | 9026.147564 | -0.601607706 | 1.031224056 | 0.8291546 |
| <b>B7LGW9</b> | TY-2482_chromosome | - | 214747 | 215595 | 2757.359939 | 2468.634514 | 2690.486216 | 2374.435847 | 2832.143265 | 2597.054469 | 0.064699418  | 0.020684049 | 0.0138748 |
| <b>B7LGX0</b> | TY-2482_chromosome | - | 215598 | 216218 | 659.6206161 | 636.5400008 | 639.7139873 | 512.2463153 | 406.6403822 | 603.3748246 | 0.377080043  | 0.97466492  | 0.7809995 |
| <b>B7LGX1</b> | TY-2482_chromosome | + | 216432 | 217685 | 2117.157303 | 2027.598041 | 2075.092172 | 848.4298912 | 953.8146095 | 769.9317249 | 1.270446444  | 9.069848193 | 8.1872037 |
| <b>B7LGX2</b> | TY-2482_chromosome | + | 217730 | 218809 | 1209.210711 | 1215.990267 | 1242.58161  | 1354.831882 | 1181.149869 | 1481.114995 | -0.114521884 | 0.279501957 | 0.2087641 |
| <b>B7LGX3</b> | TY-2482_chromosome | + | 218812 | 219642 | 517.6677947 | 456.6076847 | 456.0690509 | 480.5915503 | 409.3845023 | 605.9324685 | -0.013064256 | 0.115234919 | 0.0844825 |
| <b>B7LGX4</b> | TY-2482_chromosome | + | 219642 | 220031 | 230.3240705 | 195.1155996 | 259.8234361 | 135.5096598 | 138.2265625 | 207.1330061 | 0.647354929  | 1.697250015 | 1.409157  |
| <b>B7LGX5</b> | TY-2482_chromosome | + | 220038 | 220844 | 756.7478452 | 765.2762486 | 795.6418337 | 646.7209147 | 576.8558921 | 804.6562322 | 0.23398957   | 0.458040989 | 0.3497792 |
| <b>Q8FHZ9</b> | TY-2482_chromosome | - | 220847 | 221806 | 3374.245017 | 3266.599098 | 3404.852456 | 3442.353848 | 3828.616225 | 3702.133175 | -0.10337251  | 0.140815746 | 0.1032693 |
| <b>Q1RCM2</b> | TY-2482_chromosome | + | 221748 | 222008 | 234.2133421 | 194.5927085 | 221.8681303 | 200.2854511 | 222.1291276 | 175.3007271 | 0.147885489  | 0.265006911 | 0.1976158 |
| <b>C1NCG3</b> | TY-2482_chromosome | + | 222842 | 223078 | 47.81327931 | 46.84434598 | 50.91575006 | 19.74062717 | 52.29236746 | 15.20576271 | 0.743748362  | 1.630715187 | 1.3513998 |
| <b>rdIA</b>   | TY-2482_chromosome | + | 223116 | 223178 | 42.97450675 | 33.83398763 | 27.28560756 | 16.02665587 | 37.69213781 | 7.355369402 | 0.717296699  | 1.414288276 | 1.1619935 |
| <b>C1NCG3</b> | TY-2482_chromosome | + | 223378 | 223614 | 51.17364755 | 50.01436999 | 27.66797285 | 33.88256955 | 54.84351436 | 25.59094051 | 0.061602612  | 0.224593178 | 0.1661116 |
| <b>rdIC</b>   | TY-2482_chromosome | + | 223647 | 223714 | 49.88943042 | 36.36509836 | 25.09448121 | 23.9657914  | 40.24442581 | 21.47032846 | 0.355795262  | 0.621157703 | 0.4849079 |
| <b>B7LGX9</b> | TY-2482_chromosome | - | 224007 | 225104 | 435.4500027 | 346.8002127 | 396.7968081 | 552.6824288 | 606.0872528 | 658.9113891 | -0.547417441 | 2.607883458 | 2.2128833 |
| <b>A1AAE4</b> | TY-2482_chromosome | - | 225371 | 225667 | 144.1882183 | 168.954642  | 149.7740876 | 193.7832729 | 210.2991854 | 160.8886898 | -0.353159658 | 0.818338527 | 0.6509146 |
| <b>B7LHL5</b> | TY-2482_chromosome | + | 225741 | 226454 | 417.0716387 | 486.2556887 | 482.0717792 | 667.9434697 | 667.9918277 | 613.2523366 | -0.524145992 | 1.807404052 | 1.5034038 |
| <b>B7LHG5</b> | TY-2482_chromosome | - | 226504 | 226854 | 670.4957897 | 833.7614278 | 836.0414799 | 556.2861808 | 835.5684508 | 718.294343  | 0.166967852  | 0.312502774 | 0.23431   |
| <b>B7LHG6</b> | TY-2482_chromosome | + | 227180 | 228430 | 313.2852044 | 331.8995211 | 312.8676976 | 246.1115524 | 231.0693817 | 298.2637083 | 0.317347676  | 0.855242499 | 0.6809081 |
| <b>B7LHG8</b> | TY-2482_chromosome | - | 229080 | 230873 | 2413.282554 | 2357.153587 | 2380.113984 | 392.4446716 | 453.2393572 | 444.6140644 | 2.495101559  | 29.96374397 | 28.462761 |
| <b>D3H2K9</b> | TY-2482_chromosome | + | 230899 | 231114 | 53.05544278 | 49.76881975 | 57.57923478 | 19.25439454 | 31.97213349 | 25.04052399 | 1.134622116  | 4.474236174 | 3.8965978 |
| <b>B7LHG9</b> | TY-2482_chromosome | + | 231212 | 232600 | 18141.20459 | 16140.88215 | 16740.84029 | 42.2799195  | 36.37961207 | 33.1229538  | 8.817690722  | 56.63502049 | 54.598924 |
| <b>B7LHH0</b> | TY-2482_chromosome | + | 233119 | 236859 | 53198.43423 | 45904.62788 | 48378.63409 | 421.6991913 | 254.5473309 | 543.7556848 | 6.985441218  | 34.79229889 | 33.178276 |
| <b>B7LHH1</b> | TY-2482_chromosome | + | 236859 | 238394 | 3074.229422 | 3409.818565 | 3256.919436 | 250.2976886 | 162.6696928 | 309.74578   | 3.764516857  | 49.18288327 | 47.29439  |
| <b>B7LHH2</b> | TY-2482_chromosome | + | 238394 | 239101 | 631.0261496 | 657.2505767 | 726.4695934 | 142.8849935 | 89.90663732 | 140.4816161 | 2.439128062  | 25.23274488 | 23.823819 |
| <b>B7LHH3</b> | TY-2482_chromosome | + | 239104 | 239778 | 429.2116368 | 402.9025606 | 470.9610026 | 124.6340819 | 70.77639017 | 115.5291362 | 2.084107768  | 18.67996701 | 17.427233 |
| <b>B7LHH4</b> | TY-2482_chromosome | + | 239961 | 240407 | 103.698669  | 127.9570131 | 123.558532  | 75.5331616  | 131.2651183 | 96.17347916 | 0.236763213  | 0.500641897 | 0.3849919 |
| <b>tyrT</b>   | TY-2482_chromosome | - | 240143 | 240227 | 39.38645521 | 54.99121921 | 45.50299332 | 35.99823412 | 71.158126   | 59.08067329 | -0.251778154 | 0.434538867 | 0.3313751 |
| <b>tyrT</b>   | TY-2482_chromosome | - | 240262 | 240346 | 58.12388614 | 66.85378055 | 70.82624459 | 38.65811027 | 84.93554764 | 49.00053794 | 0.212697983  | 0.292922861 | 0.2189251 |
| <b>B7LHH5</b> | TY-2482_chromosome | - | 240509 | 241348 | 822.49761   | 842.7594901 | 927.8176973 | 1155.070228 | 1245.891096 | 1163.08678  | -0.440747376 | 1.621472951 | 1.3434229 |
| <b>B5YYD8</b> | TY-2482_chromosome | - | 241401 | 241877 | 516.4666616 | 640.4288903 | 622.0579029 | 650.6016181 | 752.6697101 | 681.5664264 | -0.250023649 | 0.584742178 | 0.453799  |
| <b>B7LHH7</b> | TY-2482_chromosome | + | 241930 | 242871 | 679.0129391 | 659.9357375 | 701.2311901 | 410.2277089 | 386.6738014 | 525.7462588 | 0.680025364  | 2.559068539 | 2.1685348 |
| <b>B7LHH8</b> | TY-2482_chromosome | + | 242966 | 243976 | 540.6264153 | 498.4997338 | 612.3363492 | 650.5989867 | 711.6705734 | 724.8167258 | -0.272800846 | 1.008611785 | 0.8100137 |
| <b>B7LHH9</b> | TY-2482_chromosome | + | 244181 | 245086 | 1867.252858 | 1947.386657 | 2001.239122 | 4850.722419 | 5060.871693 | 3844.683667 | -1.274703024 | 3.172657098 | 2.7116936 |
| <b>B7LHI0</b> | TY-2482_chromosome | - | 245236 | 245646 | 17011.15158 | 16343.73914 | 15900.31466 | 14582.21716 | 22235.56469 | 12863.38162 | -0.023610415 | 0.010416722 | 0.0067856 |
| <b>B7LHI1</b> | TY-2482_chromosome | + | 246252 | 246866 | 108.9002456 | 152.2463589 | 120.6762569 | 243.2813568 | 346.9169656 | 239.8044129 | -1.201419537 | 6.135711447 | 5.4349297 |
| <b>P30192</b> | TY-2482_chromosome | - | 247154 | 248051 | 36.58033811 | 48.99201565 | 29.93285072 | 62.88521963 | 78.37070989 | 58.17767284 | -0.911531912 | 2.784269668 | 2.3689536 |
| <b>B7LHI5</b> | TY-2482_chromosome | - | 248178 | 250850 | 30722.14958 | 25499.42393 | 28421.78375 | 55947.50757 | 37182.69446 | 54934.52239 | -0.773901652 | 1.227041435 | 0.9971251 |
| <b>B7LHI6</b> | TY-2482_chromosome | + | 251327 | 251971 | 314.8160462 | 321.8446272 | 309.5707912 | 101.5509036 | 110.1051274 | 120.8441565 | 1.524769208  | 12.58315748 | 11.531267 |
| <b>D6J9L4</b> | TY-2482_chromosome | - | 252135 | 252446 | 558.0132683 | 548.1335065 | 462.4717665 | 245.2408407 | 467.3861356 | 126.2390879 | 0.818945987  | 2.544571817 | 2.1556721 |
| <b>B7LHI8</b> | TY-2482_chromosome | + | 252712 | 254340 | 2737.792404 | 2758.881393 | 2811.296461 | 3873.829991 | 3018.559652 | 3124.785887 | -0.304759913 | 0.345060013 | 0.2600929 |
| <b>B7LHI9</b> | TY-2482_chromosome | + | 254429 | 255346 | 488.9711221 | 532.7846312 | 514.308732  | 621.928268  | 524.9842517 | 695.6237417 | -0.262281881 | 0.679067469 | 0.5328062 |
| <b>B7LHI0</b> | TY-2482_chromosome | + | 255364 | 256269 | 560.8372882 | 561.7680308 | 576.4080268 | 862.0317414 | 824.4114258 | 1112.499958 | -0.673605769 | 3.385923855 | 2.9044032 |
| <b>B7LHI1</b> | TY-2482_chromosome | + | 256284 | 257294 | 956.4671906 | 940.5148927 | 969.2385506 | 1660.605671 | 1530.586304 | 2205.6735   | -0.858164605 | 4.70011691  | 4.0999559 |
| <b>B7LHI2</b> | TY-2482_chromosome | + | 257294 | 258295 | 1059.036405 | 943.6926828 | 1011.470138 | 1901.039913 | 1743.552109 | 2370.251998 | -0.934960347 | 5.644362262 | 4.9772546 |
| <b>B7LHI3</b> | TY-2482_chromosome | - | 258354 | 258680 | 429.365688  | 399.5673097 | 386.7397962 | 326.7206214 | 430.5838521 | 339.639351  | 0.159266711  | 0.321730612 | 0.2419399 |
| <b>B7LHI4</b> | TY-2482_chromosome | - | 258718 | 260175 | 1002.063242 | 997.1612369 | 1034.627176 | 932.5978351 | 959.2295738 | 835.6575368 | 0.145098757  | 0.376817238 | 0.286234  |
| <b>B7LHI5</b> | TY-2482_chromosome | + | 260207 | 260488 | 439.9168675 | 524.0094914 | 243.8930444 | 52.58351955 | 263.1026634 | 25.09681981 | 1.646036715  | 3.93833943  | 3.4031719 |
| <b>B7LHI6</b> | TY-2482_chromosome | - | 260549 | 261799 | 443.4551482 | 435.6298879 | 446.3194245 | 181.7754778 | 247.7591495 | 137.4986768 | 1.20031033   | 7.225937895 | 6.4592433 |
| <b>D3H2N2</b> | TY-2482_chromosome | - | 262102 | 262401 | 725.3452345 | 749.4911224 | 740.102322  | 259.1744418 | 533.6015452 | 350.1884218 | 0.994128653  | 4.20616181  | 3.6502778 |
| <b>B7LHI8</b> | TY-2482_chromosome | + | 262619 | 263335 | 910.0688494 | 973.0554879 | 886.5528017 | 108.8084843 | 110.9846226 | 131.2895022 | 2.981596985  | 40.82219007 | 39.076658 |
| <b>B7LHI9</b> | TY-2482_chromosome | - | 263381 | 263776 | 134.2340028 | 96.9283996  | 103.4317878 | 90.19795005 | 137.6104699 | 93.7229092  | 0.112821907  | 0.099471524 | 0.0731715 |
| <b>B7LHK0</b> | TY-2482_chromosome | - | 263884 | 264420 | 442.0200223 | 420.2366258 | 422.4830825 | 528.1740229 | 635.2138733 | 729.7620151 | -0.50021808  | 2.720296148 | 1.822671  |
| <b>B7LHK1</b> | TY-2482_chromosome | - | 264453 | 265193 | 428.2886287 | 496.6368064 | 497.9346834 | 609.7211975 | 706.2059884 | 766.7438394 | -0.52822438  | 2.071972811 | 1.7344327 |
| <b>B7LHK2</b> | TY-2482_chromosome | + | 265550 | 266185 | 475.7432024 | 478.3066582 | 387.8199531 | 54.87450087 | 70.15102342 | 60.58714718 | 2.828184397  | 36.03761467 | 34.391106 |
| <b>B7LHK3</b> | TY-2482_chromosome | - | 266237 | 267364 | 79.77927222 | 101.8049255 | 91.77629966 | 75.71417792 | 83.85082926 | 48.01579596 | 0.296497385  | 0.998593244 | 0.8010462 |

|               |                    |   |        |        |             |             |             |             |              |             |              |             |           |
|---------------|--------------------|---|--------|--------|-------------|-------------|-------------|-------------|--------------|-------------|--------------|-------------|-----------|
| <b>E8IY14</b> | TY-2482_chromosome | - | 267268 | 267590 | 34.49306121 | 31.24797979 | 30.23344839 | 15.45113942 | 28.42656843  | 12.30592639 | 0.75980513   | 1.880634678 | 1.5678376 |
| <b>B7LHK5</b> | TY-2482_chromosome | - | 267658 | 270126 | 45.5767851  | 44.29609635 | 48.27047359 | 51.68780846 | 43.69201287  | 30.77807408 | 0.080821682  | 0.178795177 | 0.1320215 |
| <b>E11YN5</b> | TY-2482_chromosome | + | 270824 | 271157 | 178.1553921 | 186.3981932 | 126.1537115 | 101.14125   | 139.5117431  | 57.48702231 | 0.584573021  | 2.293144879 | 1.9328705 |
| <b>B7LHK9</b> | TY-2482_chromosome | + | 271090 | 271353 | 379.2802281 | 363.0244463 | 322.5726348 | 264.173828  | 317.8203254  | 157.4417417 | 0.44775213   | 1.574682708 | 1.3025489 |
| <b>B7LHL0</b> | TY-2482_chromosome | - | 271348 | 271695 | 137.7279538 | 135.9505691 | 111.8833284 | 98.67519453 | 116.6659620  | 58.67344775 | 0.399411617  | 1.436325687 | 1.1806152 |
| <b>C8TR54</b> | TY-2482_chromosome | - | 272147 | 272563 | 506.1659193 | 560.918312  | 527.4790184 | 291.7546766 | 293.2570732  | 89.47064121 | 1.087264235  | 4.599483656 | 4.0101759 |
| <b>D3GYH7</b> | TY-2482_chromosome | + | 273327 | 274301 | 25.84913121 | 37.6279934  | 36.50235518 | 34.27943463 | 23.52813036  | 37.84186147 | 0.034417527  | 0.059466679 | 0.0422887 |
| <b>D3H4E4</b> | TY-2482_chromosome | + | 274924 | 275607 | 750.0658974 | 752.2050118 | 743.3761804 | 908.7135389 | 1092.159619  | 889.5869087 | -0.367515943 | 1.225614424 | 0.9960211 |
| <b>E11YP7</b> | TY-2482_chromosome | + | 275791 | 276000 | 20627.93548 | 16244.6024  | 17418.83739 | 7524.545008 | 19505.82842  | 5259.779052 | 0.770013284  | 0.957898481 | 0.7669002 |
| <b>E7IAU7</b> | TY-2482_chromosome | - | 276048 | 276518 | 1323.921307 | 1190.059083 | 1030.2322   | 1144.345129 | 3460.855545  | 644.8029576 | -0.608262231 | 0.943248489 | 0.755076  |
| <b>C8UNL5</b> | TY-2482_chromosome | + | 278818 | 279117 | 473.208311  | 527.7220732 | 530.2540422 | 314.7320998 | 531.7856428  | 287.4310843 | 0.41782688   | 1.190365479 | 0.9660675 |
| <b>B7LER9</b> | TY-2482_chromosome | + | 279271 | 280317 | 94.90865384 | 81.69670675 | 113.3017887 | 137.2422757 | 91.79865842  | 100.2192215 | -0.164934812 | 0.37186989  | 0.281664  |
| <b>ileY</b>   | TY-2482_chromosome | + | 280370 | 280445 | 43.3940894  | 39.38299088 | 43.61350888 | 7.595178187 | 10.94259352  | 11.69650993 | 2.127683864  | 10.45311782 | 9.50049   |
| <b>B7L8R4</b> | TY-2482_chromosome | + | 280730 | 281080 | 62.47775517 | 88.58528509 | 79.97485271 | 59.60897222 | 56.35243495  | 73.34154922 | 0.260959992  | 0.642894988 | 0.5023264 |
| <b>B7MV04</b> | TY-2482_chromosome | + | 281211 | 281522 | 2677.769523 | 2926.440894 | 918.2188879 | 219.6823816 | 630.4441254  | 174.8203289 | 2.458744048  | 11.02805313 | 10.054449 |
| <b>B7UQ15</b> | TY-2482_chromosome | - | 281534 | 281866 | 247.6462859 | 207.5255925 | 241.7248394 | 94.16172576 | 59.159889125 | 16.97361157 | 1.894071945  | 9.913441134 | 8.9864893 |
| <b>B7LES0</b> | TY-2482_chromosome | + | 282127 | 283977 | 319.8170544 | 370.7137894 | 393.7305652 | 420.9234535 | 379.4087137  | 466.7866951 | -0.212959565 | 0.553559149 | 0.4281126 |
| <b>B7LES2</b> | TY-2482_chromosome | + | 284351 | 285154 | 39.23437153 | 58.1524411  | 58.37974799 | 34.97075809 | 33.69269501  | 26.61767651 | 0.636717941  | 2.103984142 | 1.7633278 |
| <b>D8EE44</b> | TY-2482_chromosome | + | 287803 | 288204 | 469.2768477 | 609.4921336 | 610.9391131 | 681.8069121 | 828.3614344  | 432.3786524 | -0.284785492 | 0.404986885 | 0.3071004 |
| <b>A1AAK5</b> | TY-2482_chromosome | + | 288353 | 289153 | 32.1351483  | 29.19352257 | 34.44660953 | 9.917193753 | 26.6300604   | 13.41769676 | 1.004924415  | 2.446983581 | 2.0695799 |
| <b>B7L465</b> | TY-2482_chromosome | + | 289086 | 291053 | 40.44573664 | 45.0044227  | 31.28939892 | 38.0962469  | 32.68703245  | 41.90703382 | -0.008651586 | 0.035543044 | 0.0241669 |
| <b>B7L467</b> | TY-2482_chromosome | + | 291243 | 292832 | 70.39578184 | 55.74202873 | 70.10849765 | 66.85572531 | 50.7929235   | 92.68970924 | 0.010407364  | 0.140280941 | 0.1032424 |
| <b>C8U3B6</b> | TY-2482_chromosome | + | 292825 | 294327 | 51.64712611 | 49.17267327 | 48.09979306 | 62.33876309 | 38.90820275  | 88.57384637 | -0.293460041 | 0.687079492 | 0.539296  |
| <b>D3H3D9</b> | TY-2482_chromosome | + | 294367 | 294711 | 31.68565192 | 29.96712382 | 17.91691013 | 36.12653958 | 29.02051169  | 41.80103827 | -0.47434     | 0.82215242  | 0.6540284 |
| <b>B7L470</b> | TY-2482_chromosome | + | 294772 | 295797 | 72.25797621 | 94.20245432 | 88.56186123 | 132.792588  | 106.3673755  | 136.6291216 | -0.596258723 | 2.094952278 | 1.7557529 |
| <b>D3H3E3</b> | TY-2482_chromosome | + | 296581 | 297153 | 26.78682271 | 32.70489026 | 29.01024095 | 37.82120774 | 32.62901388  | 58.48132031 | -0.51691966  | 1.196052989 | 0.9709568 |
| <b>A1AAL5</b> | TY-2482_chromosome | - | 297652 | 298983 | 72.71181281 | 60.20664071 | 63.26827312 | 104.5095499 | 79.03218036  | 116.7175703 | -0.570875724 | 2.193843189 | 1.8441277 |
| <b>B7LEU0</b> | TY-2482_chromosome | + | 299174 | 301744 | 94.8868346  | 109.6203061 | 92.24583859 | 59.30484499 | 41.60989842  | 118.2465576 | 0.504477847  | 0.911101212 | 0.7278623 |
| <b>Q1RCC4</b> | TY-2482_chromosome | - | 301980 | 302777 | 38.88903451 | 44.99355041 | 32.68354971 | 36.51343977 | 35.41000474  | 52.12397598 | -0.107992727 | 0.108897097 | 0.0798776 |
| <b>B7LEU3</b> | TY-2482_chromosome | + | 302734 | 303516 | 31.12649934 | 19.21069793 | 17.40107208 | 30.01768023 | 27.21010667  | 41.63185831 | -0.463057153 | 1.106510867 | 0.8941681 |
| <b>B7ML65</b> | TY-2482_chromosome | + | 304120 | 304467 | 414.1444677 | 493.187647  | 423.7180518 | 216.2369758 | 377.110314   | 183.6023106 | 0.714079513  | 2.848671966 | 2.426317  |
| <b>B7LBD5</b> | TY-2482_chromosome | + | 304537 | 308013 | 154.5478331 | 204.1606454 | 169.562956  | 133.1236966 | 113.6148121  | 179.5915147 | 0.287952755  | 0.795732477 | 0.6320699 |
| <b>E6AYR0</b> | TY-2482_chromosome | + | 308835 | 311666 | 216.7674002 | 243.8539413 | 219.083174  | 169.0102019 | 146.4746395  | 147.4852067 | 0.497498201  | 2.178512433 | 1.8300724 |
| <b>B2U0E5</b> | TY-2482_chromosome | + | 311669 | 312250 | 130.6690762 | 168.1260706 | 135.8276792 | 119.1337043 | 111.9589417  | 89.85630437 | 0.32649182   | 1.390771597 | 1.1408518 |
| <b>D3H3F8</b> | TY-2482_chromosome | - | 312631 | 312976 | 633.1769631 | 786.8094577 | 703.7673658 | 358.166998  | 442.5560376  | 177.3870523 | 0.991142745  | 4.85232147  | 4.202507  |
| <b>B7L492</b> | TY-2482_chromosome | - | 315777 | 316580 | 224.4767339 | 213.6903806 | 191.2008492 | 573.2652707 | 526.8449333  | 636.5132758 | -1.462346295 | 11.42608218 | 10.430437 |
| <b>B7L493</b> | TY-2482_chromosome | - | 316583 | 317773 | 358.3694025 | 295.1398421 | 338.0722594 | 905.7849128 | 689.6701527  | 960.0751808 | -1.31358448  | 9.460862459 | 8.5626926 |
| <b>B7L494</b> | TY-2482_chromosome | - | 317788 | 319143 | 275.9477804 | 265.8112847 | 279.3075256 | 452.7027338 | 369.3882903  | 430.1518621 | -0.606106447 | 2.57496957  | 2.1837337 |
| <b>B7L495</b> | TY-2482_chromosome | - | 319150 | 320778 | 92.68884855 | 97.57745522 | 91.68756524 | 109.1227642 | 88.16885217  | 114.246411  | -0.155751283 | 0.315030053 | 0.2363814 |
| <b>B7L496</b> | TY-2482_chromosome | - | 320781 | 322340 | 45.67714307 | 41.72121439 | 42.85434474 | 54.11100708 | 31.66062277  | 58.77448525 | -0.12817144  | 0.204504407 | 0.1511099 |
| <b>B7L498</b> | TY-2482_chromosome | + | 322614 | 323492 | 611.7573541 | 567.5000521 | 616.7173754 | 696.6186444 | 729.8521169  | 768.209409  | -0.249605958 | 0.845123635 | 0.6726334 |
| <b>B5YZP6</b> | TY-2482_chromosome | + | 323456 | 324109 | 681.0728814 | 749.6478965 | 810.3296149 | 1439.596293 | 1305.864342  | 1457.617003 | -0.901214275 | 4.925260508 | 4.3092772 |
| <b>B7L4A0</b> | TY-2482_chromosome | + | 324186 | 325082 | 990.7784957 | 1043.198076 | 1063.698772 | 1817.094521 | 1863.788128  | 1839.257179 | -0.833243566 | 4.380068774 | 3.8113338 |
| <b>B7L4A1</b> | TY-2482_chromosome | - | 325128 | 325715 | 346.8654596 | 398.2427868 | 355.0915706 | 628.57164   | 565.9956209  | 620.9267612 | -0.764093041 | 3.486122535 | 2.993207  |
| <b>B7L4A2</b> | TY-2482_chromosome | - | 325715 | 326470 | 406.6314397 | 480.6852577 | 442.9891953 | 830.8846654 | 714.3108659  | 823.4847963 | -0.870757535 | 4.304753658 | 3.7419705 |
| <b>B7L4A4</b> | TY-2482_chromosome | + | 326690 | 327736 | 1167.049442 | 1426.508742 | 1498.99995  | 1336.021713 | 1141.144233  | 1199.924322 | 0.123900452  | 0.335701193 | 0.2523512 |
| <b>B7L4A5</b> | TY-2482_chromosome | - | 327778 | 328076 | 919.6021847 | 1157.472444 | 999.4951884 | 512.3035101 | 849.3285616  | 566.0529396 | 0.636718254  | 2.3125582   | 1.096638  |
| <b>B7L4A6</b> | TY-2482_chromosome | + | 328071 | 328280 | 94.0163542  | 112.615989  | 108.3409225 | 119.3743914 | 131.072993   | 125.0123143 | -0.27207036  | 0.710898016 | 0.5590034 |
| <b>B7L4A7</b> | TY-2482_chromosome | + | 328406 | 331048 | 1990.681423 | 2022.215475 | 2084.408669 | 6124.109098 | 5362.86824   | 5907.08522  | -1.515614442 | 4.318795447 | 3.752693  |
| <b>B7L4A8</b> | TY-2482_chromosome | + | 331261 | 332232 | 1327.368945 | 1265.622082 | 1432.881537 | 998.8208222 | 1102.137122  | 926.438189  | 0.43022184   | 1.354872053 | 1.1096638 |
| <b>B7L4B0</b> | TY-2482_chromosome | + | 332675 | 332860 | 527.1111017 | 576.5160261 | 551.9296709 | 145.2989843 | 218.5837818  | 164.6388671 | 1.649528454  | 13.27105639 | 12.188052 |
| <b>B7L4B2</b> | TY-2482_chromosome | + | 333236 | 335908 | 2784.165584 | 2884.664924 | 2752.43358  | 1396.107961 | 1195.67841   | 1687.447429 | 0.993825103  | 3.145102835 | 2.6866077 |
| <b>B7L4B3</b> | TY-2482_chromosome | - | 335978 | 336565 | 1507.60385  | 1558.16284  | 1496.0167   | 802.8917822 | 982.9396951  | 855.2526781 | 0.788435382  | 3.947449539 | 3.4109748 |
| <b>E6BMY3</b> | TY-2482_chromosome | + | 336735 | 336735 | 655.7429336 | 680.2375023 | 718.4507013 | 572.1347297 | 515.9535137  | 542.0665106 | 0.330550727  | 1.014189773 | 0.8145381 |
| <b>B7L4B5</b> | TY-2482_chromosome | + | 337648 | 337953 | 688.8916845 | 636.5047773 | 605.2362451 | 613.9138775 | 739.9943968  | 550.30158   | 0.006733505  | 0.033099367 | 0.0226989 |
| <b>B7L4B6</b> | TY-2482_chromosome | + | 337963 | 339129 | 749.9877253 | 800.794384  | 779.7204647 | 1107.465393 | 993.748421   | 960.5832461 | -0.429852326 | 1.401436711 | 1.1501614 |
| <b>B5YZR3</b> | TY-2482_chromosome | + | 339265 | 340059 | 318.0241245 | 286.1697794 | 262.4922653 | 493.7376154 | 567.0413945  | 468.597536  | -0.828226064 | 4.061600539 | 3.5165322 |



|               |                    |   |        |        |             |             |              |             |             |             |              |             |           |
|---------------|--------------------|---|--------|--------|-------------|-------------|--------------|-------------|-------------|-------------|--------------|-------------|-----------|
| <b>B7L4B8</b> | TY-2482_chromosome | + | 340062 | 340385 | 91.83967588 | 91.09586092 | 111.2321434  | 152.2899457 | 156.5298078 | 155.2600479 | -0.617080944 | 3.022043702 | 2.5793882 |
| <b>B7L4B9</b> | TY-2482_chromosome | - | 340517 | 340732 | 288.5701773 | 318.702826  | 291.7242023  | 267.6724446 | 353.2496113 | 258.1889724 | 0.002341007  | 0.051265266 | 0.0361612 |
| <b>B7L4C0</b> | TY-2482_chromosome | - | 341004 | 341750 | 262.5188523 | 242.9227588 | 263.4813045  | 303.2441071 | 325.8084177 | 326.2344871 | -0.27780334  | 0.913150195 | 0.7294726 |
| <b>B7L4C1</b> | TY-2482_chromosome | - | 341843 | 342055 | 143.5139094 | 158.8916412 | 140.4795597  | 80.57266375 | 100.2028877 | 79.15697229 | 0.733740898  | 3.831591494 | 3.3036434 |
| <b>B7L4C2</b> | TY-2482_chromosome | - | 342163 | 344145 | 456.8639848 | 451.3289001 | 491.339452   | 382.8638724 | 397.7202487 | 359.3311804 | 0.304475327  | 0.367482595 | 0.6659821 |
| <b>B7L4C3</b> | TY-2482_chromosome | - | 344384 | 346315 | 1873.402377 | 1826.203469 | 1707.185233  | 2783.684156 | 2558.050451 | 3449.069661 | -0.676018422 | 1.343578204 | 1.1003736 |
| <b>B7L4C4</b> | TY-2482_chromosome | - | 346386 | 347510 | 258.1375207 | 232.3728124 | 230.2775019  | 91.20153741 | 72.65646475 | 116.5215957 | 1.408898025  | 9.799389621 | 8.8804067 |
| <b>B7L4C5</b> | TY-2482_chromosome | - | 347658 | 348443 | 7872.568865 | 7061.347516 | 7767.053031  | 7746.363533 | 9777.677114 | 8817.265536 | -0.162546765 | 0.237896212 | 0.1761361 |
| <b>B7L5A7</b> | TY-2482_chromosome | - | 348816 | 349166 | 41.31159129 | 29.92311063 | 36.96852274  | 31.49461461 | 29.07561654 | 34.08997413 | 0.263956081  | 0.346677653 | 0.2613973 |
| <b>B7L554</b> | TY-2482_chromosome | - | 349237 | 350040 | 470.4201543 | 443.624276  | 464.1454804  | 244.1120949 | 217.3797346 | 316.5004497 | 0.881401734  | 4.041434826 | 3.4990288 |
| <b>B7L555</b> | TY-2482_chromosome | - | 350045 | 351034 | 770.997422  | 785.5261977 | 760.5181467  | 535.8847495 | 454.9116487 | 603.5238477 | 0.548821947  | 2.097083953 | 1.7576768 |
| <b>B7L556</b> | TY-2482_chromosome | - | 351037 | 351924 | 455.4948118 | 423.0297482 | 437.036429   | 320.7319958 | 343.026528  | 449.3917809 | 0.310091458  | 0.598008856 | 0.4648732 |
| <b>B7L557</b> | TY-2482_chromosome | - | 351914 | 352876 | 377.0540007 | 365.334877  | 308.6326326  | 304.9353474 | 343.9629311 | 425.774432  | -0.005334003 | 0.052846992 | 0.0373438 |
| <b>B7L558</b> | TY-2482_chromosome | - | 352876 | 354516 | 638.8091931 | 559.7767855 | 573.63129    | 613.8953361 | 601.4919749 | 702.2956614 | -0.073067637 | 0.235599038 | 0.1747156 |
| <b>B7L559</b> | TY-2482_chromosome | - | 354831 | 355073 | 64.29086282 | 60.04947456 | 68.11528568  | 52.71355875 | 60.00460172 | 84.88031356 | 0.06164747   | 0.034263077 | 0.023375  |
| <b>B7L560</b> | TY-2482_chromosome | - | 355210 | 356592 | 77.62788092 | 64.53946856 | 56.71337297  | 48.19293861 | 67.44059633 | 57.90808039 | 0.127646887  | 0.022465209 | 0.0152692 |
| <b>B7L561</b> | TY-2482_chromosome | - | 356898 | 358313 | 48.0078284  | 35.24315605 | 45.63389895  | 43.1180942  | 56.53047641 | 42.33154401 | -0.070268457 | 0.196286132 | 0.1449314 |
| <b>D3H3K5</b> | TY-2482_chromosome | + | 358513 | 359286 | 81.28581968 | 97.34241571 | 97.17897803  | 64.40560637 | 68.30486942 | 54.23837892 | 0.519405148  | 1.981185009 | 1.6554881 |
| <b>B7L563</b> | TY-2482_chromosome | + | 359316 | 359870 | 113.506452  | 130.7457041 | 124.8005751  | 165.5865437 | 151.027306  | 159.2072049 | -0.397494639 | 1.217648918 | 0.9890232 |
| <b>B7L564</b> | TY-2482_chromosome | + | 360148 | 361632 | 33.406643   | 34.61548948 | 48.69225216  | 38.50761022 | 24.45345926 | 31.60377571 | 0.32627492   | 0.538342721 | 0.4156388 |
| <b>B7L565</b> | TY-2482_chromosome | + | 361637 | 362914 | 33.62678451 | 37.7961562  | 30.83232944  | 39.55403847 | 21.73038192 | 21.43999384 | 0.173409151  | 0.457336382 | 0.3493187 |
| <b>B7L566</b> | TY-2482_chromosome | + | 362955 | 364217 | 112.3819536 | 86.6316042  | 100.9994956  | 64.50848989 | 72.01186996 | 42.69541657 | 0.745966996  | 2.94679781  | 2.5122441 |
| <b>B7L567</b> | TY-2482_chromosome | + | 364343 | 365317 | 430.7333748 | 417.8095341 | 443.735185   | 250.0110494 | 294.0167269 | 255.3623769 | 0.7124681    | 3.255884515 | 2.7865903 |
| <b>B7L568</b> | TY-2482_chromosome | + | 365484 | 366149 | 442.595036  | 486.3766527 | 468.7574464  | 468.145844  | 248.4615796 | 162.6183877 | 0.848707592  | 4.553768571 | 3.9681413 |
| <b>Q8FHS4</b> | TY-2482_chromosome | - | 366228 | 366482 | 75.32754429 | 84.99281331 | 91.30991232  | 61.06934306 | 35.34610506 | 44.85839235 | 0.78192692   | 3.268604235 | 2.7971926 |
| <b>B7L570</b> | TY-2482_chromosome | + | 366430 | 366786 | 101.5291921 | 106.1986153 | 123.74779932 | 77.25449176 | 62.76062386 | 55.59528566 | 0.735979295  | 3.469364362 | 2.9777617 |
| <b>B7L571</b> | TY-2482_chromosome | + | 366798 | 367016 | 34.00262552 | 59.02879129 | 44.8589197   | 38.63907968 | 44.64780236 | 37.00823221 | 0.082630995  | 0.29323782  | 0.2191272 |
| <b>B7L572</b> | TY-2482_chromosome | + | 367094 | 367405 | 613.0545131 | 684.8071996 | 684.07927    | 743.4269036 | 126.818269  | 820.0149904 | -0.516832766 | 1.758337941 | 1.4626043 |
| <b>C8TR14</b> | TY-2482_chromosome | + | 374236 | 375288 | 19.11560399 | 33.68930694 | 25.04953414  | 41.61359891 | 34.53972254 | 34.35967692 | -0.639942044 | 1.126682239 | 0.9115376 |
| <b>B7L581</b> | TY-2482_chromosome | + | 375288 | 377552 | 36.60407639 | 34.25587617 | 39.73664978  | 75.58721062 | 48.12625531 | 49.01358548 | -0.678882324 | 1.862965553 | 1.5528974 |
| <b>B7L585</b> | TY-2482_chromosome | - | 380371 | 381366 | 95.60856151 | 102.9198216 | 103.7070672  | 126.7647068 | 124.6696386 | 122.4215846 | -0.318282797 | 0.927266693 | 0.741408  |
| <b>B7L586</b> | TY-2482_chromosome | + | 381521 | 382915 | 267.78733   | 284.7065352 | 222.0947894  | 924.3903592 | 680.5883864 | 837.9946399 | -1.730421131 | 13.53677843 | 12.449142 |
| <b>B7L587</b> | TY-2482_chromosome | + | 382915 | 383973 | 209.2732413 | 262.9597853 | 191.0828997  | 425.7402284 | 317.4550976 | 448.304583  | -0.929430489 | 3.914763701 | 3.3821986 |
| <b>B7L588</b> | TY-2482_chromosome | + | 384124 | 385662 | 3113.919621 | 3168.531166 | 3326.349329  | 1635.343636 | 1528.858961 | 1544.601675 | 1.026708919  | 2.494693422 | 2.111544  |
| <b>B7L589</b> | TY-2482_chromosome | - | 385712 | 386215 | 8353.302932 | 8292.009706 | 8845.260328  | 8338.658454 | 11424.01009 | 9425.176746 | -0.160581916 | 0.209586077 | 0.1551142 |
| <b>B7L590</b> | TY-2482_chromosome | + | 386334 | 387296 | 357.3646305 | 383.520853  | 375.0097325  | 367.2601791 | 304.7726755 | 365.6167672 | 0.089739248  | 0.214850305 | 0.1588675 |
| <b>B7L591</b> | TY-2482_chromosome | - | 387277 | 388062 | 343.3698593 | 297.3584366 | 327.4865778  | 330.2517763 | 344.920897  | 334.2101532 | -0.024626299 | 0.110619824 | 0.0810891 |
| <b>B7L593</b> | TY-2482_chromosome | - | 388341 | 389270 | 70.99010637 | 74.52811132 | 71.92314771  | 80.89315499 | 53.6114807  | 47.82782098 | 0.164172482  | 0.512195321 | 0.3943041 |
| <b>B7L594</b> | TY-2482_chromosome | + | 389396 | 390292 | 389.6511245 | 388.8162129 | 364.962407   | 188.3153234 | 226.7019282 | 179.1868028 | 0.927708777  | 5.285200562 | 4.6403755 |
| <b>B7L595</b> | TY-2482_chromosome | + | 390632 | 392242 | 741.1725827 | 683.2772793 | 714.3507098  | 1528.522047 | 1232.125619 | 1348.573822 | -0.947433554 | 5.33212184  | 4.6847693 |
| <b>B7L596</b> | TY-2482_chromosome | - | 392299 | 393327 | 190.4399136 | 248.1123228 | 211.8529101  | 131.234436  | 158.4633148 | 116.1358582 | 0.604161016  | 2.92516041  | 2.492991  |
| <b>B7L597</b> | TY-2482_chromosome | + | 393571 | 393825 | 852.4922616 | 944.1555166 | 790.0338521  | 168.6317162 | 396.3921782 | 149.5672105 | 1.807637106  | 10.20222938 | 9.2663394 |
| <b>B7L598</b> | TY-2482_chromosome | - | 393881 | 393881 | 4126.323498 | 4816.323884 | 4922.217141  | 3700.272587 | 2880.197033 | 3496.817505 | 0.435265168  | 0.674780082 | 0.5287852 |
| <b>B7L599</b> | TY-2482_chromosome | - | 394983 | 395732 | 1961.949214 | 1475.062791 | 1577.107437  | 3201.227472 | 3842.297516 | 3581.099286 | -1.019984933 | 2.61043621  | 2.2144899 |
| <b>B7L5A0</b> | TY-2482_chromosome | - | 395930 | 396442 | 409.1984623 | 373.9035646 | 362.9594004  | 251.2945713 | 324.1202685 | 237.1513715 | 0.49613192   | 1.761570656 | 1.4654608 |
| <b>B7L5A1</b> | TY-2482_chromosome | - | 396456 | 397979 | 200.9082808 | 282.9423387 | 203.6936843  | 69.49860055 | 79.23127635 | 67.26609221 | 1.558346183  | 13.58981509 | 12.501012 |
| <b>B7L5A2</b> | TY-2482_chromosome | - | 397912 | 398103 | 45.21316525 | 72.50916816 | 61.47333646  | 14.52846129 | 13.64765262 | 11.99110366 | 2.047799212  | 12.02705679 | 11.002188 |
| <b>B7L5A3</b> | TY-2482_chromosome | - | 398019 | 399461 | 566.4724062 | 816.6889038 | 684.6196396  | 105.6975465 | 88.15732993 | 124.5880859 | 2.642396653  | 29.50578523 | 28.013757 |
| <b>B7L5A4</b> | TY-2482_chromosome | - | 399464 | 400771 | 1252.33584  | 1542.042427 | 1517.357331  | 132.8277519 | 118.2689902 | 119.8226429 | 3.495022559  | 57.01715475 | 50.970593 |
| <b>B7L5A5</b> | TY-2482_chromosome | + | 401852 | 401852 | 103.8400299 | 122.3595644 | 102.1490517  | 120.2725306 | 102.7566143 | 122.2298579 | -0.123968698 | 0.14751782  | 0.1474743 |
| <b>B7L5A6</b> | TY-2482_chromosome | + | 402185 | 402745 | 177.1305014 | 219.3363498 | 161.3875435  | 181.9095221 | 200.2848771 | 158.1990445 | -0.057635068 | 0.061517412 | 0.0433654 |
| <b>B7L5A8</b> | TY-2482_chromosome | - | 402772 | 404001 | 449.3238005 | 521.659379  | 450.1131136  | 283.230278  | 366.8092168 | 362.9366628 | 0.481201415  | 1.691792322 | 1.404622  |
| <b>B7L5A9</b> | TY-2482_chromosome | + | 404256 | 405236 | 535.2937418 | 609.7350875 | 573.7215262  | 180.9316383 | 191.0611949 | 237.709728  | 1.511125957  | 11.72213611 | 10.711129 |
| <b>C6UTJ2</b> | TY-2482_chromosome | - | 405472 | 405472 | 22.25816785 | 29.76364543 | 25.04389593  | 32.21087814 | 30.00368148 | 31.585271   | -0.343338113 | 0.481902796 | 0.368853  |
| <b>B7L5B1</b> | TY-2482_chromosome | + | 405717 | 407087 | 285.7481286 | 268.2560713 | 265.9706437  | 553.5385065 | 482.2123835 | 656.0700526 | -1.012404754 | 6.041416102 | 5.3468014 |
| <b>B7L5B2</b> | TY-2482_chromosome | - | 407222 | 408154 | 290.1293019 | 281.3463969 | 303.1305377  | 568.8686012 | 554.2379945 | 488.3583645 | -0.887430262 | 4.751305612 | 4.1469558 |
| <b>D3H4I5</b> | TY-2482_chromosome | - | 408333 | 408836 | 807.5298089 | 832.448727  | 919.9087     | 323.6583702 | 317.5663789 | 357.6769453 | 1.389130865  | 10.26162494 | 9.323265  |

|               |                    |   |        |        |             |             |             |             |              |             |              |             |           |
|---------------|--------------------|---|--------|--------|-------------|-------------|-------------|-------------|--------------|-------------|--------------|-------------|-----------|
| <b>B7L5B5</b> | TY-2482_chromosome | - | 410408 | 413929 | 3757.081979 | 3712.288464 | 4010.381149 | 6074.717409 | 4720.26859   | 7234.014537 | -0.607223851 | 1.068640655 | 0.8620012 |
| <b>D3H4I8</b> | TY-2482_chromosome | - | 414003 | 414440 | 309.5600292 | 301.960197  | 327.5788439 | 265.1529291 | 314.968984   | 255.4669833 | 0.183251024  | 0.382630702 | 0.2904291 |
| <b>B7L5B7</b> | TY-2482_chromosome | - | 414469 | 414888 | 405.2595884 | 419.8306498 | 419.2522162 | 758.3211621 | 916.5234941  | 739.6173769 | -0.961645399 | 5.476602238 | 4.8194227 |
| <b>B7L5B8</b> | TY-2482_chromosome | - | 415002 | 415988 | 744.36062   | 1110.724739 | 1027.504567 | 4455.127244 | 4801.4653591 | 4438.986523 | -2.308978003 | 8.70716045  | 7.8436948 |
| <b>B7L5B9</b> | TY-2482_chromosome | + | 416196 | 418832 | 894.3031311 | 983.3770646 | 924.9326233 | 539.2394199 | 539.6788512  | 486.9807704 | 0.801344662  | 4.586376975 | 3.9996488 |
| <b>B7L6A3</b> | TY-2482_chromosome | + | 419025 | 419348 | 242.8841808 | 289.7900857 | 252.0859997 | 81.25516072 | 71.00878569  | 49.25511605 | 1.84526585   | 17.90608163 | 16.674871 |
| <b>B7L6A4</b> | TY-2482_chromosome | - | 419526 | 420428 | 50.7670897  | 60.54550435 | 48.65194499 | 59.94415907 | 50.91121271  | 54.005108   | -0.117662744 | 0.073251076 | 0.0527939 |
| <b>B7L6A5</b> | TY-2482_chromosome | + | 420664 | 422160 | 53.51587986 | 80.19165199 | 64.65021578 | 104.265208  | 102.7866714  | 122.1052429 | -0.791083674 | 3.15227619  | 2.6929598 |
| <b>B7L6A6</b> | TY-2482_chromosome | - | 424494 | 424494 | 37.93804939 | 50.13247707 | 42.19063708 | 58.84464969 | 50.96942329  | 38.60719756 | -0.303911209 | 0.343372304 | 0.2586366 |
| <b>B7L6A7</b> | TY-2482_chromosome | - | 424745 | 426787 | 41.70890626 | 48.57651734 | 48.27832777 | 68.45956717 | 49.00012855  | 73.36428478 | -0.469630981 | 1.248432471 | 1.0164106 |
| <b>B7L6B2</b> | TY-2482_chromosome | + | 429575 | 430642 | 47.86683949 | 46.60764547 | 46.83551839 | 45.46418269 | 23.51856174  | 27.89896188 | 0.472723213  | 1.336180996 | 1.0939748 |
| <b>B7L6B3</b> | TY-2482_chromosome | + | 430642 | 431406 | 33.72330063 | 31.19278894 | 30.2512788  | 26.27112228 | 22.6873644   | 28.78737279 | 0.304471781  | 0.522266637 | 0.4022316 |
| <b>B7L6B4</b> | TY-2482_chromosome | + | 431409 | 432194 | 31.33877857 | 31.32860373 | 34.42648233 | 27.41606975 | 18.13216551  | 17.38336443 | 0.578543577  | 1.425015821 | 1.171358  |
| <b>B7L6B5</b> | TY-2482_chromosome | + | 432199 | 433623 | 47.56156882 | 56.86659408 | 67.06589131 | 50.22307292 | 26.17806156  | 54.77171536 | 0.40832466   | 0.799994841 | 0.6359159 |
| <b>B7L6B7</b> | TY-2482_chromosome | + | 434038 | 435240 | 72.94712728 | 92.41963564 | 101.3522903 | 77.78400342 | 62.73041359  | 65.9017743  | 0.337559594  | 1.006248806 | 0.807801  |
| <b>B7L6B8</b> | TY-2482_chromosome | + | 435270 | 436580 | 121.1604459 | 109.2623766 | 126.2318706 | 82.15813835 | 66.32487148  | 89.20007876 | 0.631655605  | 2.509078918 | 2.1241221 |
| <b>B7L6B9</b> | TY-2482_chromosome | + | 436684 | 437631 | 475.3815039 | 525.7528781 | 594.528413  | 322.3610589 | 313.0129197  | 353.7337815 | 0.71793648   | 3.048466268 | 2.6031693 |
| <b>B7L6C0</b> | TY-2482_chromosome | + | 437616 | 438203 | 457.5825816 | 459.0425735 | 505.2419127 | 310.7828024 | 266.5729314  | 299.9202681 | 0.707173382  | 3.219980986 | 2.7557043 |
| <b>B7L6C1</b> | TY-2482_chromosome | + | 438436 | 439293 | 240.5519051 | 302.5999638 | 272.6619499 | 667.8711139 | 587.7980139  | 741.7212639 | -1.322515438 | 9.123954631 | 8.2398553 |
| <b>B7L6C2</b> | TY-2482_chromosome | + | 439360 | 441663 | 58.26698024 | 70.45820921 | 52.51241463 | 199.7469509 | 137.3262997  | 130.6630277 | -1.509026324 | 8.589588032 | 7.7323317 |
| <b>B7L6C5</b> | TY-2482_chromosome | + | 443354 | 445108 | 47.95863074 | 44.06490978 | 42.10044364 | 55.1864486  | 60.12430132  | 46.35526707 | -0.289309971 | 0.553594718 | 0.4281126 |
| <b>B7L6C6</b> | TY-2482_chromosome | + | 445125 | 446414 | 36.25415004 | 55.26636787 | 52.36289983 | 58.5603188  | 51.82860636  | 55.28211161 | -0.263657035 | 0.411498031 | 0.3130151 |
| <b>B7L6C7</b> | TY-2482_chromosome | - | 446471 | 447073 | 216.7623863 | 258.5116926 | 207.0481298 | 444.9026746 | 546.0894563  | 518.2974092 | -1.183879274 | 7.218182526 | 6.4520436 |
| <b>B7L6C8</b> | TY-2482_chromosome | + | 447331 | 451173 | 2622.669918 | 2573.505887 | 2601.299313 | 1971.997354 | 1674.347491  | 2524.048404 | 0.382525698  | 4.073391493 | 3.3620666 |
| <b>B7L6C9</b> | TY-2482_chromosome | + | 451448 | 452245 | 113.6332139 | 106.5407473 | 122.9661277 | 217.922071  | 225.6889406  | 230.1950971 | -0.932115496 | 5.981346597 | 5.2895489 |
| <b>B7L6D0</b> | TY-2482_chromosome | + | 452445 | 453881 | 197.4232959 | 195.9037447 | 194.7232332 | 135.3584475 | 115.4911141  | 140.6073614 | 0.590691958  | 2.49760229  | 2.113568  |
| <b>B7L6D1</b> | TY-2482_chromosome | - | 453929 | 454927 | 309.6697419 | 284.0479062 | 298.4057387 | 598.4557598 | 540.537832   | 538.2122959 | -0.909748484 | 5.019177505 | 4.3943694 |
| <b>B7L6D2</b> | TY-2482_chromosome | + | 455116 | 455643 | 521.7951048 | 594.551729  | 591.6572825 | 288.0902801 | 247.3850891  | 390.0462636 | 0.917948953  | 4.273132353 | 3.7138124 |
| <b>Q0THZ6</b> | TY-2482_chromosome | + | 456130 | 456357 | 508.1061954 | 430.5355973 | 377.2351125 | 196.2931777 | 433.6860862  | 164.0626508 | 0.717420413  | 2.066567288 | 1.7300609 |
| <b>B7L6D5</b> | TY-2482_chromosome | + | 456684 | 458321 | 136.6547369 | 154.3731916 | 160.5922062 | 391.7566355 | 290.179877   | 359.0982158 | -1.227370446 | 7.991012587 | 7.170516  |
| <b>B7L6D6</b> | TY-2482_chromosome | - | 458365 | 459285 | 129.3259346 | 140.9426772 | 124.6230436 | 158.5021836 | 223.1031772  | 176.445979  | -0.512572645 | 1.776843585 | 1.4777121 |
| <b>B7L6D7</b> | TY-2482_chromosome | + | 459502 | 460842 | 69.85155837 | 54.91085637 | 51.85198279 | 113.0590317 | 94.55691218  | 115.6265058 | -0.852801496 | 4.172032105 | 3.6178559 |
| <b>D7XGD6</b> | TY-2482_chromosome | - | 460845 | 461039 | 22.38698844 | 17.17281625 | 27.39561191 | 28.21201002 | 26.35239297  | 30.17027991 | -0.240644846 | 0.530018656 | 0.4088822 |
| <b>B7L6D8</b> | TY-2482_chromosome | + | 461100 | 462722 | 483.7204698 | 522.7038463 | 524.9412197 | 1060.559344 | 969.1261103  | 1178.535902 | -1.05842746  | 7.318395862 | 6.545541  |
| <b>B7L6D9</b> | TY-2482_chromosome | - | 462649 | 462849 | 40.80453493 | 55.79995717 | 55.6694091  | 162.2249433 | 179.3613992  | 137.1896161 | -1.703876499 | 12.8293647  | 11.677714 |
| <b>B7L6E0</b> | TY-2482_chromosome | + | 462865 | 463086 | 294.4611838 | 364.1082565 | 304.1995663 | 626.1323267 | 744.6620965  | 332.5685916 | -0.958938864 | 2.994428385 | 2.5551908 |
| <b>B7L6E1</b> | TY-2482_chromosome | + | 463137 | 463685 | 270.5882484 | 283.5641793 | 302.5276174 | 736.4641262 | 592.4804133  | 349.5873856 | -1.068516233 | 4.123977372 | 3.5735214 |
| <b>B7L6E2</b> | TY-2482_chromosome | - | 463686 | 464663 | 243.7151361 | 230.3948916 | 277.5713252 | 230.0999255 | 229.3945206  | 168.8995237 | 0.255517982  | 0.660986762 | 0.516985  |
| <b>B7L6E3</b> | TY-2482_chromosome | + | 464787 | 465776 | 184.0106229 | 192.3648171 | 160.1344306 | 414.818968  | 481.4697341  | 443.407178  | -1.347170619 | 5.981545195 | 8.67772   |
| <b>B7L6E4</b> | TY-2482_chromosome | + | 465776 | 466366 | 216.8011496 | 216.8125402 | 233.1702166 | 1311.024738 | 1301.419832  | 1041.061983 | -2.474071531 | 29.11531369 | 27.632059 |
| <b>B7L6E5</b> | TY-2482_chromosome | + | 466672 | 467337 | 569.7987171 | 584.7099226 | 582.3159828 | 660.6327548 | 740.8678649  | 583.1552863 | -0.212681013 | 0.461823059 | 0.3529504 |
| <b>B3IA33</b> | TY-2482_chromosome | - | 467361 | 467844 | 85.77663853 | 100.167569  | 103.8261194 | 85.29802807 | 101.1177961  | 74.02806604 | 0.128066449  | 0.31118848  | 0.2332235 |
| <b>B7L6E8</b> | TY-2482_chromosome | + | 467867 | 469072 | 223.8535322 | 205.7219516 | 165.2498673 | 116.7595235 | 140.2470853  | 108.1688615 | 0.667111811  | 3.063690499 | 2.6165325 |
| <b>B7L6E9</b> | TY-2482_chromosome | - | 469118 | 470290 | 89.82027141 | 94.28358303 | 72.90645924 | 59.23457225 | 55.50552866  | 51.48311392 | 0.557332572  | 2.279497435 | 1.9203123 |
| <b>B7L6F0</b> | TY-2482_chromosome | + | 470382 | 470915 | 90.63143982 | 73.48968749 | 84.51811215 | 66.24488746 | 59.06683413  | 78.61233856 | 0.354927907  | 0.747966069 | 0.5914571 |
| <b>B7L6F1</b> | TY-2482_chromosome | + | 470991 | 472949 | 385.9659198 | 343.5733877 | 374.3719903 | 358.5801271 | 314.7887663  | 389.1848892 | 0.095308725  | 0.104275826 | 0.0772297 |
| <b>D7XGF3</b> | TY-2482_chromosome | + | 473456 | 473647 | 43.18551837 | 46.78136566 | 54.40217763 | 50.20672747 | 51.97250008  | 28.28478573 | 0.098556413  | 0.203396895 | 0.1503251 |
| <b>B7L6F3</b> | TY-2482_chromosome | + | 473675 | 474109 | 101.5484903 | 103.7526808 | 122.4276445 | 147.0806919 | 166.6281877  | 126.654142  | -0.416594205 | 1.426459387 | 1.1726309 |
| <b>B7L6F4</b> | TY-2482_chromosome | + | 474191 | 475594 | 128.0119084 | 109.2263856 | 118.1399992 | 223.7724112 | 239.3469376  | 244.6352335 | -0.948844954 | 6.128146103 | 5.4283188 |
| <b>B7L6F5</b> | TY-2482_chromosome | + | 475842 | 476984 | 153.2550741 | 133.1749186 | 178.6412154 | 270.2397151 | 206.4729777  | 244.6867169 | -0.585637515 | 2.547708227 | 2.1583423 |
| <b>B7L6F6</b> | TY-2482_chromosome | + | 477005 | 478015 | 79.98824725 | 80.03965384 | 81.20529492 | 150.9185001 | 110.0257033  | 114.6871954 | -0.68135436  | 2.74520109  | 2.3357872 |
| <b>B7L6F7</b> | TY-2482_chromosome | + | 478019 | 478957 | 50.00035142 | 58.34709712 | 50.72720337 | 69.54396359 | 65.46986124  | 77.4386204  | -0.442760356 | 1.164684518 | 0.9467198 |
| <b>B7L6F8</b> | TY-2482_chromosome | + | 478950 | 479741 | 51.63385758 | 47.05229385 | 50.84755052 | 124.1727948 | 120.1168542  | 117.1825304 | -1.258955575 | 8.824117954 | 7.9536474 |
| <b>B7L6F9</b> | TY-2482_chromosome | + | 479766 | 481187 | 155.9753813 | 212.0500941 | 186.8565223 | 501.4446547 | 370.2632675  | 456.4627568 | -1.337496175 | 8.079936725 | 7.2511798 |
| <b>B7L6G0</b> | TY-2482_chromosome | + | 481400 | 482206 | 373.5783515 | 515.6451085 | 439.6721357 | 289.0765341 | 365.4060996  | 21.26824693 | 0.738564453  | 1.440831188 | 1.1844344 |
| <b>C8TRH0</b> | TY-2482_chromosome | + | 482551 | 482739 | 100.6623545 | 102.7068946 | 41.82314891 | 9.66622433  | 41.4063329   | 12.406779   | 1.835544547  | 6.315343154 | 5.6029408 |
| <b>B7L6G1</b> | TY-2482_chromosome | + | 482826 | 483071 | 48.69801883 | 42.05461124 | 45.5223774  | 17.53249913 | 22.81372702  | 18.52278935 | 1.242925016  | 4.982643885 | 4.361123  |

|        |                    |   |        |        |             |             |             |             |             |             |              |              |           |
|--------|--------------------|---|--------|--------|-------------|-------------|-------------|-------------|-------------|-------------|--------------|--------------|-----------|
| B7L6G2 | TY-2482_chromosome | + | 483160 | 483390 | 644.0165166 | 686.0088419 | 480.7193548 | 325.2057367 | 511.6694815 | 352.8954791 | 0.547525461  | 2.108169409  | 1.7668871 |
| B7L6G3 | TY-2482_chromosome | - | 483397 | 483843 | 212.2491623 | 255.9744538 | 209.0712683 | 136.2603551 | 163.8462522 | 163.021759  | 0.514774884  | 2.069582722  | 1.7326631 |
| B7L6G4 | TY-2482_chromosome | - | 483843 | 484592 | 335.5486706 | 403.4809871 | 382.3160863 | 212.5463501 | 232.9768407 | 243.2608702 | 0.692891916  | 3.192344808  | 2.7305554 |
| B7L6G5 | TY-2482_chromosome | + | 484539 | 485573 | 352.5155857 | 518.431158  | 482.8112968 | 239.9555668 | 170.8202655 | 424.822115  | 0.739829122  | 2.015741717  | 1.6851833 |
| D3GRI3 | TY-2482_chromosome | + | 485717 | 486436 | 101.5671138 | 115.3164048 | 108.9249088 | 53.68120848 | 63.7668208  | 54.07858745 | 0.903003619  | 4.868137269  | 4.2545057 |
| B7L6G7 | TY-2482_chromosome | - | 486478 | 488577 | 207.1208871 | 201.4407841 | 215.3044113 | 344.4598733 | 393.1522987 | 415.543715  | -0.840556713 | 4.748889106  | 4.1449218 |
| B7L6G8 | TY-2482_chromosome | + | 488819 | 489877 | 1034.183194 | 1020.678068 | 1131.145786 | 249.6921016 | 223.8278037 | 234.2248643 | 2.180149261  | 24.46703432  | 23.07014  |
| B7L6G9 | TY-2482_chromosome | - | 489996 | 491492 | 560.8587365 | 531.4336969 | 589.0482577 | 168.4801559 | 137.3611741 | 137.0263517 | 1.915759964  | 19.13975765  | 17.878352 |
| B7L6H0 | TY-2482_chromosome | + | 491759 | 492373 | 40.98550351 | 44.02636656 | 48.36159989 | 29.94105196 | 47.53335208 | 24.18847979 | 0.382908141  | 0.77964068   | 0.6183402 |
| B7L7F9 | TY-2482_chromosome | + | 495660 | 499898 | 85.94478707 | 80.81669969 | 95.26698181 | 79.3573774  | 66.30688215 | 100.7950443 | 0.159338071  | 0.172777634  | 0.1275907 |
| B7L7G3 | TY-2482_chromosome | - | 501681 | 502247 | 77.06191668 | 74.83212192 | 72.52455948 | 68.00858744 | 99.39136816 | 60.96996752 | -0.036188764 | 0.040833111  | 0.0278912 |
| B7L7G4 | TY-2482_chromosome | + | 502420 | 503262 | 115.5088918 | 182.4072135 | 139.8506038 | 205.4220831 | 129.3349702 | 215.7602427 | -0.647751947 | 2.0701517253 | 1.7341841 |
| B7L7G5 | TY-2482_chromosome | - | 503364 | 504254 | 301.2594736 | 329.3081792 | 318.8885605 | 594.697832  | 688.0298072 | 684.0285805 | -1.043694069 | 6.662018547  | 5.9259169 |
| B7L7G6 | TY-2482_chromosome | - | 504336 | 505013 | 36.47121698 | 36.94517417 | 47.21116864 | 68.97991453 | 73.76527059 | 59.48043814 | -0.722901938 | 2.742374535  | 2.3334489 |
| B7L7G7 | TY-2482_chromosome | - | 505013 | 505705 | 31.27884805 | 25.24063687 | 42.78051105 | 65.39208402 | 61.78086567 | 92.81770458 | -0.992131192 | 4.794289246  | 4.1860961 |
| B7L7G8 | TY-2482_chromosome | - | 505708 | 507249 | 71.04042136 | 74.26912751 | 66.52436924 | 183.3047033 | 122.6443082 | 224.2947619 | -1.315853194 | 7.779496606  | 6.9762754 |
| B7L7G9 | TY-2482_chromosome | - | 507249 | 510986 | 140.3846522 | 166.6815938 | 159.8274172 | 535.3390521 | 375.6522336 | 624.3374309 | -1.720361275 | 12.92575833  | 11.857477 |
| B7L7H0 | TY-2482_chromosome | - | 511071 | 512456 | 59.69364892 | 71.1057059  | 61.96457318 | 150.5665518 | 127.3372599 | 142.0775538 | -1.176939643 | 7.467096789  | 6.6862729 |
| C6UU60 | TY-2482_chromosome | - | 514687 | 515565 | 79.61876895 | 66.990799   | 52.30926638 | 83.99210845 | 100.2149982 | 71.42672244 | -0.399781053 | 0.913147016  | 0.7294726 |
| B7L7H4 | TY-2482_chromosome | + | 515797 | 518841 | 1425.427104 | 1393.545089 | 1330.23357  | 122.4984801 | 82.65820452 | 116.9051081 | 3.668568045  | 55.33934434  | 53.36124  |
| B7L7H5 | TY-2482_chromosome | + | 518857 | 519738 | 207.2362294 | 195.9661534 | 188.013607  | 49.11863838 | 28.97776945 | 39.48799526 | 2.289516858  | 24.8287529   | 23.42226  |
| B7L7H6 | TY-2482_chromosome | + | 519734 | 520384 | 110.9885668 | 81.48299813 | 90.30518405 | 43.89494699 | 53.79234479 | 38.47110077 | 1.08811829   | 5.430730059  | 4.7769399 |
| B7L7H7 | TY-2482_chromosome | - | 520441 | 520809 | 142.877628  | 124.9096012 | 146.701294  | 187.7096752 | 197.4877885 | 196.0231818 | -0.438184522 | 1.855447569  | 1.5464873 |
| B7L7H8 | TY-2482_chromosome | - | 520872 | 521879 | 755.4840974 | 662.741174  | 668.0148861 | 1354.350812 | 1142.943524 | 1298.466727 | -0.85582286  | 4.962646874  | 4.3431118 |
| B7L7H9 | TY-2482_chromosome | - | 522016 | 523710 | 4924.440007 | 4940.865137 | 5313.031015 | 7450.825318 | 5908.858637 | 6985.858113 | -0.422330764 | 0.573402248  | 0.4442563 |
| B7L7I0 | TY-2482_chromosome | - | 524109 | 524321 | 11.80605164 | 13.2282294  | 16.05083182 | 91.47042484 | 145.8255722 | 95.07640766 | -2.978753199 | 22.75081869  | 21.398969 |
| B7L7I1 | TY-2482_chromosome | + | 524667 | 525095 | 893.7562014 | 834.9474275 | 823.8525091 | 1129.858193 | 1534.499158 | 1172.46227  | -0.573580837 | 2.290329299  | 1.930273  |
| B7L7I2 | TY-2482_chromosome | - | 525157 | 526080 | 100.3040067 | 93.04662014 | 90.31026103 | 74.476425   | 80.9399714  | 107.3675336 | 0.168854132  | 0.215334068  | 0.1590245 |
| B7L7I3 | TY-2482_chromosome | - | 526076 | 527059 | 43.43807978 | 43.46273835 | 37.410015   | 50.57537631 | 46.36540807 | 52.54058922 | -0.285722802 | 0.575657602  | 0.4459989 |
| B7L7I4 | TY-2482_chromosome | - | 527059 | 527952 | 46.19306544 | 68.79285523 | 41.14886627 | 43.88275285 | 59.32259311 | 33.41295611 | 0.024447823  | 0.258644078  | 0.1925845 |
| B7L7I6 | TY-2482_chromosome | - | 528976 | 530523 | 30.98275325 | 39.3983202  | 56.1605087  | 47.3104867  | 28.09704237 | 30.53462506 | 0.235044222  | 0.426731783  | 0.3257347 |
| B7L7I8 | TY-2482_chromosome | - | 531379 | 533775 | 222.033735  | 261.0229788 | 203.0263241 | 366.4455348 | 304.7416005 | 420.6035916 | -0.716881792 | 2.745673711  | 2.3360155 |
| B7L7I9 | TY-2482_chromosome | - | 533803 | 535182 | 168.9228233 | 160.793097  | 193.7191331 | 306.1789363 | 266.5814222 | 293.3670776 | -0.69523242  | 3.445877583  | 2.9565001 |
| B7L7J0 | TY-2482_chromosome | - | 535557 | 536873 | 111.5888473 | 110.0089831 | 85.39810512 | 164.3640611 | 171.1696017 | 121.5431493 | -0.656810686 | 2.22060289   | 1.8687786 |
| B7L7J1 | TY-2482_chromosome | - | 537007 | 538539 | 57.48350458 | 63.93309306 | 60.04481696 | 648.0035523 | 408.4145548 | 608.8937305 | -3.234453514 | 36.512672    | 34.857648 |
| B7L7J2 | TY-2482_chromosome | - | 538698 | 540095 | 204.3139062 | 171.2251996 | 188.1365675 | 1276.611475 | 849.8328373 | 1053.850312 | -2.497118016 | 26.92647766  | 25.495019 |
| B7L7J3 | TY-2482_chromosome | - | 540460 | 543252 | 299.0592904 | 299.2578839 | 322.9724928 | 104.8531622 | 80.01121946 | 81.77831052 | 1.762396375  | 16.39274015  | 15.201742 |
| B7L7J4 | TY-2482_chromosome | - | 543300 | 545669 | 172.0516879 | 157.8647089 | 168.3653429 | 60.37873059 | 49.15834243 | 30.91515132 | 1.760615057  | 15.0276593   | 13.890758 |
| B7L7J6 | TY-2482_chromosome | - | 547686 | 548840 | 48.56406543 | 57.75282253 | 43.28006525 | 75.93754909 | 60.93303583 | 55.566627   | -0.478201747 | 0.95033966   | 0.7611104 |
| B7L7J7 | TY-2482_chromosome | - | 548895 | 550574 | 593.7468073 | 648.1215133 | 554.3593329 | 472.1456141 | 335.7024955 | 355.4598741 | 0.5365448    | 2.535623224  | 2.1474219 |
| B7L7K0 | TY-2482_chromosome | - | 552260 | 554536 | 205.3822323 | 263.8705276 | 237.0219072 | 111.6571114 | 64.43807014 | 88.1750818  | 1.324425494  | 9.560171061  | 8.6582215 |
| B7L7K1 | TY-2482_chromosome | - | 554873 | 555784 | 118.8620803 | 130.5188613 | 112.7082404 | 27.44265621 | 16.28099328 | 18.60607512 | 2.441431291  | 23.58973507  | 22.206851 |
| B7L7K2 | TY-2482_chromosome | - | 555846 | 556346 | 97.29954505 | 88.20100965 | 91.0492297  | 21.23690549 | 15.39873932 | 18.44505972 | 2.318177636  | 19.50871441  | 18.234975 |
| B7L7K3 | TY-2482_chromosome | - | 556362 | 556889 | 93.27488114 | 124.060152  | 95.5108797  | 19.31818182 | 16.37831394 | 12.16453831 | 2.566320483  | 22.4487048   | 21.10533  |
| B7L7K4 | TY-2482_chromosome | - | 556906 | 559554 | 283.4741247 | 251.0724673 | 289.3014131 | 61.75231102 | 70.16634491 | 49.08642451 | 2.195946904  | 23.45246224  | 22.076418 |
| B7L7K5 | TY-2482_chromosome | - | 559599 | 560315 | 162.2213795 | 165.0183691 | 169.0514265 | 42.98388494 | 10.47075749 | 28.08410262 | 2.105956781  | 23.15060806  | 21.785729 |
| B7L7K6 | TY-2482_chromosome | - | 560643 | 561251 | 3620.139762 | 3730.321183 | 4186.786691 | 1235.349371 | 1390.674178 | 985.8975983 | 1.664552483  | 5.403563277  | 4.7511906 |
| B7L7K8 | TY-2482_chromosome | - | 562159 | 563478 | 296.6881081 | 327.1972324 | 352.7771471 | 266.9395635 | 217.4302472 | 231.650801  | 0.427490592  | 1.554639413  | 1.2837502 |
| D7YR1T | TY-2482_chromosome | - | 563481 | 563771 | 92.46813136 | 122.0761988 | 106.2680685 | 83.78249481 | 81.98583851 | 49.34765183 | 0.45202377   | 1.864622391  | 1.5541655 |
| B7L7L0 | TY-2482_chromosome | - | 563956 | 569374 | 102.8044527 | 150.1120165 | 134.7891582 | 180.4323977 | 105.354636  | 170.7514207 | -0.313017564 | 0.860137918  | 0.4088822 |
| B7L7L1 | TY-2482_chromosome | - | 569908 | 571497 | 61.36847635 | 52.69355729 | 62.15578598 | 115.5210148 | 83.64836354 | 80.58836338 | -0.680445008 | 2.494498029  | 2.1111544 |
| B7L7L2 | TY-2482_chromosome | - | 571579 | 572529 | 99.36329131 | 107.8678527 | 104.304826  | 184.3281722 | 139.1491151 | 148.826927  | -0.651273612 | 2.574974511  | 2.1837337 |
| B7L7L3 | TY-2482_chromosome | + | 572778 | 574310 | 21.3960903  | 36.14123132 | 25.63207138 | 90.05924965 | 55.38585831 | 60.79752514 | -1.485321845 | 5.661995196  | 4.9912085 |
| B7L7L4 | TY-2482_chromosome | + | 574307 | 575332 | 25.4547808  | 21.57543432 | 25.81485705 | 58.26468729 | 31.66193712 | 53.722819   | -0.953875402 | 3.116446692  | 2.6617636 |
| B7L7L5 | TY-2482_chromosome | + | 575335 | 576324 | 19.4458542  | 16.42684916 | 20.56667497 | 57.92380876 | 34.4707259  | 34.58110336 | -1.196250564 | 4.051385657  | 3.5076505 |
| B7L7L6 | TY-2482_chromosome | + | 576339 | 577358 | 49.363815   | 57.6139559  | 40.54963906 | 110.034592  | 87.29913513 | 89.63534278 | -1.069339445 | 4.69747059   | 4.0980668 |
| B7L7L7 | TY-2482_chromosome | + | 577388 | 578260 | 52.30924941 | 45.25464928 | 59.69127817 | 209.2267838 | 177.4334452 | 159.5209306 | -1.777601513 | 15.39500679  | 14.238088 |

|               |                    |   |        |        |             |             |             |             |             |             |              |             |           |
|---------------|--------------------|---|--------|--------|-------------|-------------|-------------|-------------|-------------|-------------|--------------|-------------|-----------|
| <b>B7L7L8</b> | TY-2482_chromosome | + | 578287 | 578574 | 19.00108946 | 30.43851851 | 35.47594311 | 103.6639433 | 79.12507826 | 70.12726633 | -1.642170678 | 8.468512308 | 7.6160247 |
| <b>B7L7L9</b> | TY-2482_chromosome | + | 578634 | 579389 | 175.8211164 | 155.5350543 | 170.358058  | 160.8484565 | 154.6689792 | 170.9208468 | 0.082705747  | 0.092364464 | 0.067821  |
| <b>B7L7M0</b> | TY-2482_chromosome | - | 579399 | 580310 | 85.89682654 | 90.2590328  | 93.8340385  | 85.24603158 | 89.18063285 | 92.03561006 | 0.032348784  | 0.029554864 | 0.0197388 |
| <b>B7L7M1</b> | TY-2482_chromosome | - | 580520 | 581968 | 352.7947248 | 401.3357879 | 395.5463662 | 665.7559713 | 457.6064658 | 577.5320261 | -0.610213992 | 2.139061845 | 1.7942154 |
| <b>E1HZE7</b> | TY-2482_chromosome | - | 582116 | 582277 | 35.63534167 | 37.21775869 | 52.68235863 | 51.50115814 | 37.20543322 | 47.30629152 | -0.074726543 | 0.15792629  | 0.1154761 |
| <b>B7L7M2</b> | TY-2482_chromosome | - | 582198 | 583613 | 302.0457679 | 319.1987295 | 312.2741051 | 307.2055591 | 311.2096953 | 341.906231  | -0.034440349 | 0.073736285 | 0.0530795 |
| <b>B7L7M3</b> | TY-2482_chromosome | - | 583755 | 584111 | 54.63606869 | 47.42082151 | 54.86943519 | 59.73152894 | 59.13921744 | 60.51964758 | -0.1533433   | 0.380016985 | 0.2883199 |
| <b>B7L7M4</b> | TY-2482_chromosome | - | 584114 | 585037 | 192.8017787 | 225.5498159 | 197.9486854 | 233.1081599 | 228.400453  | 238.0989348 | -0.223031056 | 0.447794131 | 0.3422102 |
| <b>B7L7M5</b> | TY-2482_chromosome | - | 585104 | 586489 | 288.3806156 | 357.1476232 | 348.7283931 | 348.7283931 | 97.22328375 | 153.377236  | 1.414950638  | 9.804995237 | 8.8852219 |
| <b>B7L7M6</b> | TY-2482_chromosome | + | 586590 | 587468 | 61.95838052 | 64.65002302 | 69.44608212 | 70.27112955 | 68.23560274 | 69.74450599 | -0.079997788 | 0.148270806 | 0.1080185 |
| <b>B7L8K7</b> | TY-2482_chromosome | + | 588812 | 589999 | 207.9710253 | 203.3537294 | 185.9807514 | 183.6974069 | 220.3212952 | 180.4493013 | 0.017250977  | 0.048862744 | 0.0340542 |
| <b>B7L8K8</b> | TY-2482_chromosome | - | 590030 | 590692 | 320.1637761 | 274.4012351 | 317.0027293 | 173.826075  | 243.2078174 | 140.0689363 | 0.729920229  | 2.877374683 | 2.4505169 |
| <b>B7L8K9</b> | TY-2482_chromosome | + | 590904 | 591335 | 120.3066317 | 130.9623159 | 124.7483069 | 118.1559665 | 140.2641115 | 99.08850874 | 0.033201058  | 0.121725664 | 0.0892864 |
| <b>B7L8L0</b> | TY-2482_chromosome | + | 591358 | 591738 | 266.9266903 | 265.6884412 | 280.0054441 | 324.8618898 | 375.9045186 | 343.4365198 | -0.341352375 | 1.126120927 | 0.9111324 |
| <b>B7L8L1</b> | TY-2482_chromosome | + | 591773 | 591988 | 106.7075598 | 135.1915535 | 120.134273  | 130.5566872 | 140.1628387 | 136.8325893 | -0.211960195 | 0.429434214 | 0.3275958 |
| <b>B7L8L2</b> | TY-2482_chromosome | - | 592051 | 593493 | 52.34875278 | 53.84417832 | 49.38911305 | 37.28193647 | 26.33216457 | 24.00738244 | 0.748811607  | 2.852905916 | 2.4300975 |
| <b>B7L8L8</b> | TY-2482_chromosome | - | 598273 | 599169 | 68.35324669 | 101.7232899 | 101.3114486 | 99.56010857 | 107.3653401 | 122.1035112 | -0.287064033 | 0.730651646 | 0.5754867 |
| <b>B7L8L9</b> | TY-2482_chromosome | + | 599364 | 600548 | 63.33609984 | 81.20582225 | 72.62162788 | 90.52853675 | 99.23198683 | 89.57552254 | -0.410554334 | 1.103467771 | 0.8919001 |
| <b>B7L8M0</b> | TY-2482_chromosome | - | 600996 | 601883 | 129.4885815 | 114.1381072 | 119.4354319 | 180.7607766 | 197.5966705 | 128.2129329 | -0.503517796 | 1.628343841 | 1.349752  |
| <b>B7L8M1</b> | TY-2482_chromosome | - | 602141 | 602530 | 51.76417093 | 57.22851172 | 33.03814647 | 70.49858544 | 79.32348555 | 40.21614227 | -0.584940938 | 0.916645589 | 0.7325352 |
| <b>B7L8M2</b> | TY-2482_chromosome | + | 602806 | 603321 | 24.35769874 | 39.23453548 | 31.70025368 | 29.54017965 | 32.81464254 | 25.24905748 | 0.017731809  | 0.110617548 | 0.0810891 |
| <b>B7L8M3</b> | TY-2482_chromosome | - | 603372 | 605414 | 1345.158881 | 1542.373142 | 1523.24045  | 2127.238209 | 1829.117833 | 2156.158462 | -0.488148729 | 1.669160123 | 1.3836456 |
| <b>D3GSH5</b> | TY-2482_chromosome | + | 605536 | 606294 | 3041.271182 | 3338.223753 | 3516.57981  | 3218.688371 | 3271.668558 | 2841.987894 | 0.066179508  | 0.0899256   | 0.0658626 |
| <b>B7L8M5</b> | TY-2482_chromosome | + | 606386 | 607069 | 766.3950845 | 831.7847231 | 836.5798288 | 531.9133658 | 515.9675235 | 551.177696  | 0.60367362   | 2.71119229  | 2.0371192 |
| <b>A1ABC3</b> | TY-2482_chromosome | - | 607211 | 607480 | 89.10012664 | 84.93867167 | 76.35323174 | 30.47927172 | 25.45777989 | 22.61384751 | 1.617288574  | 11.24904459 | 10.261797 |
| <b>B7L8M7</b> | TY-2482_chromosome | - | 607492 | 608949 | 115.9807595 | 113.2453737 | 104.1301521 | 116.6726645 | 79.950774   | 101.2850229 | 0.123559495  | 0.344661226 | 0.2598099 |
| <b>B7L8M8</b> | TY-2482_chromosome | - | 609041 | 610321 | 38.401162   | 69.46394971 | 57.5531385  | 52.83668349 | 41.80134328 | 43.55291692 | 0.132338434  | 0.438125842 | 0.3342374 |
| <b>D3GTE7</b> | TY-2482_chromosome | - | 610466 | 611482 | 80.37288785 | 119.152103  | 105.7290405 | 159.704371  | 97.22631145 | 113.3663582 | -0.403669963 | 0.688906419 | 0.5237099 |
| <b>B7L5D3</b> | TY-2482_chromosome | - | 611497 | 612708 | 85.21221614 | 80.66753857 | 91.91307802 | 67.93122091 | 75.49855849 | 94.30648382 | 0.194479624  | 0.236486263 | 0.1752743 |
| <b>D3GTE9</b> | TY-2482_chromosome | - | 612917 | 613249 | 44.55177869 | 69.50597804 | 52.02867517 | 22.1614558  | 21.79146882 | 28.66656314 | 1.121010828  | 4.714252287 | 4.1137121 |
| <b>B7L5D5</b> | TY-2482_chromosome | + | 613375 | 613713 | 842.0573896 | 847.4170651 | 823.2350473 | 582.96601   | 645.2489034 | 635.4067594 | 0.439117827  | 1.536362888 | 1.2665377 |
| <b>B7L5D6</b> | TY-2482_chromosome | + | 614308 | 614380 | 904.9248406 | 868.3638082 | 867.4778317 | 822.1097878 | 838.1429529 | 877.440167  | 0.07234238   | 0.118559209 | 0.0871936 |
| <b>B5Z420</b> | TY-2482_chromosome | - | 614317 | 615060 | 301.3406593 | 294.1817208 | 315.6741569 | 198.2488754 | 231.2521229 | 176.6301022 | 0.589641213  | 2.446231678 | 2.0690548 |
| <b>Q6EWW5</b> | TY-2482_chromosome | + | 615129 | 615434 | 436.0498487 | 447.4700605 | 378.0045123 | 138.4248444 | 211.1787705 | 241.5047249 | 1.143988811  | 5.840586732 | 5.1575911 |
| <b>B7L5D9</b> | TY-2482_chromosome | + | 615636 | 618059 | 209.2474476 | 226.6140119 | 233.8284582 | 118.9184615 | 112.8238773 | 114.5045456 | 0.942414662  | 5.844241625 | 5.1607871 |
| <b>B7L5E0</b> | TY-2482_chromosome | + | 618123 | 620543 | 107.497048  | 141.9948005 | 107.3562644 | 115.7244885 | 103.7071186 | 106.6371128 | 0.030249914  | 0.234561706 | 0.1740066 |
| <b>Q8KU25</b> | TY-2482_chromosome | + | 621078 | 621710 | 244.5274573 | 247.2426439 | 240.2554655 | 105.2583368 | 132.8908202 | 144.4140351 | 0.977601673  | 5.329416937 | 4.6824867 |
| <b>D7JRD8</b> | TY-2482_chromosome | + | 622250 | 623083 | 43.96191986 | 44.59499302 | 55.10121767 | 40.23201412 | 27.16146386 | 43.11949496 | 0.419657155  | 0.866145363 | 0.6902444 |
| <b>C8TPV2</b> | TY-2482_chromosome | + | 623061 | 623600 | 24.52828897 | 22.06059062 | 33.43006555 | 26.78016224 | 25.42132903 | 33.91313307 | -0.000339898 | 0.09230547  | 0.067821  |
| <b>B3IP95</b> | TY-2482_chromosome | + | 623600 | 624100 | 56.39532794 | 83.82522073 | 84.82464071 | 44.91581067 | 59.20662058 | 57.7621434  | 0.474150378  | 1.290103749 | 1.0518682 |
| <b>C8UML1</b> | TY-2482_chromosome | - | 624507 | 632855 | 936.8413483 | 1096.451403 | 1036.579498 | 1085.64741  | 879.8922456 | 1177.159632 | -0.051804958 | 0.059644861 | 0.0423679 |
| <b>C8UML0</b> | TY-2482_chromosome | - | 632927 | 634189 | 54.94499897 | 83.20493186 | 74.73174499 | 74.92555927 | 74.63668859 | 67.27501185 | -0.105174568 | 0.056275905 | 0.0397725 |
| <b>C6UNY2</b> | TY-2482_chromosome | - | 634913 | 635566 | 41.2317979  | 28.01503742 | 43.16093569 | 27.34099709 | 13.48798478 | 24.82419786 | 0.853078311  | 0.076670264 | 1.7387159 |
| <b>C8U7H9</b> | TY-2482_chromosome | - | 635661 | 636059 | 173.9932581 | 132.0772602 | 110.3649493 | 60.64511487 | 124.2462252 | 32.64213609 | 0.895037265  | 2.602637457 | 2.2083456 |
| <b>C8UMK2</b> | TY-2482_chromosome | - | 638227 | 639492 | 54.45705026 | 45.91137258 | 72.52078368 | 49.27105721 | 32.57817436 | 63.82589208 | 0.375888673  | 0.476277333 | 0.3643372 |
| <b>C6UNY7</b> | TY-2482_chromosome | - | 639492 | 641192 | 48.36405463 | 63.24956668 | 57.47649713 | 50.66615464 | 32.58076367 | 61.2901593  | 0.207089771  | 0.400395036 | 0.3038179 |
| <b>C8UMJ7</b> | TY-2482_chromosome | - | 642326 | 644230 | 51.92212451 | 89.53852664 | 66.5970715  | 41.39488548 | 27.23632212 | 22.81231975 | 0.985351152  | 4.540159714 | 3.9559959 |
| <b>B7MPZ1</b> | TY-2482_chromosome | - | 644880 | 645500 | 28.529309   | 29.94398965 | 20.7415479  | 29.48150851 | 27.24674078 | 34.01223959 | -0.238284141 | 0.295370269 | 0.2210339 |
| <b>C8U7J1</b> | TY-2482_chromosome | - | 645939 | 646325 | 22.55787177 | 18.65730265 | 19.02339481 | 31.28624104 | 34.56954855 | 39.26750187 | -0.749700995 | 2.151973889 | 1.8060736 |
| <b>C8U7J2</b> | TY-2482_chromosome | - | 646383 | 647594 | 64.28319903 | 66.78157353 | 63.30512157 | 107.5568276 | 72.67877967 | 86.9154996  | -0.508798929 | 1.418369255 | 1.1653935 |
| <b>B7MPY7</b> | TY-2482_chromosome | - | 647620 | 648624 | 34.94659739 | 36.81270035 | 46.56577182 | 46.94380928 | 51.83680029 | 65.38517365 | -0.388037347 | 1.183776202 | 0.9613879 |
| <b>B5YYP6</b> | TY-2482_chromosome | - | 648785 | 650926 | 200.2972488 | 230.7821841 | 203.2232953 | 130.6301012 | 106.3378376 | 160.005792  | 0.666000513  | 2.885918559 | 2.458552  |
| <b>C8UMI9</b> | TY-2482_chromosome | - | 650929 | 652632 | 132.1888698 | 172.8376393 | 129.1095822 | 93.82910635 | 79.05395074 | 115.3188937 | 0.5331142    | 2.14456747  | 1.7992998 |
| <b>C8U7J6</b> | TY-2482_chromosome | - | 652616 | 653428 | 54.72986261 | 53.56740667 | 42.56145573 | 26.68541606 | 30.94989446 | 32.76086428 | 0.729285908  | 2.343367189 | 1.9776051 |
| <b>Q07682</b> | TY-2482_chromosome | + | 654031 | 654609 | 55.62468257 | 26.7849467  | 54.46842694 | 6.931889065 | 11.90375848 | 9.241049652 | 2.46414883   | 10.43996601 | 9.4898903 |
| <b>C6USU0</b> | TY-2482_chromosome | - | 656320 | 656724 | 41.27564222 | 36.40774343 | 34.13058632 | 32.4950671  | 23.58512314 | 26.41036899 | 0.409769302  | 0.977254144 | 0.7832914 |
| <b>B7MPX6</b> | TY-2482_chromosome | - | 656912 | 658849 | 223.6316487 | 245.8287759 | 187.7600174 | 178.9240634 | 160.1610791 | 141.0860317 | 0.354622487  | 1.498830557 | 1.2346413 |

|               |                    |   |        |        |              |             |             |             |             |             |               |              |           |
|---------------|--------------------|---|--------|--------|--------------|-------------|-------------|-------------|-------------|-------------|---------------|--------------|-----------|
| <b>Q9FBI1</b> | TY-2482_chromosome | + | 658955 | 659266 | 6702.274578  | 5600.227978 | 2137.708641 | 685.6338953 | 2795.730574 | 489.5530556 | 1.74118036    | 3.347177614  | 2.8673838 |
| <b>C6UP10</b> | TY-2482_chromosome | - | 659588 | 660019 | 53.02605573  | 56.48609264 | 54.7774345  | 34.31454042 | 33.7035527  | 25.33842833 | 0.764861364   | 2.935551325  | 2.5020317 |
| <b>B7MPW6</b> | TY-2482_chromosome | - | 661535 | 662203 | 59.77354145  | 75.04037209 | 50.41759024 | 29.01597751 | 40.05282534 | 48.23603498 | 0.630300192   | 1.874965417  | 1.5637298 |
| <b>C8TS13</b> | TY-2482_chromosome | + | 662589 | 662914 | 200.992852   | 223.8765906 | 228.5523934 | 87.49250114 | 98.41398839 | 58.5135485  | 1.361439962   | 10.35028219  | 9.4054089 |
| <b>C8TS14</b> | TY-2482_chromosome | + | 662910 | 663244 | 204.8333382  | 228.3153754 | 199.2178047 | 129.2447224 | 161.2149811 | 112.2396577 | 0.596308648   | 2.757439303  | 2.3459122 |
| <b>D6I789</b> | TY-2482_chromosome | - | 663281 | 663763 | 1450.683963  | 1642.424677 | 1476.82857  | 766.7535958 | 1110.506382 | 662.3437386 | 0.797633228   | 3.831370376  | 3.3036434 |
| <b>Q8X288</b> | TY-2482_chromosome | - | 664174 | 664383 | 11677.03022  | 9292.446612 | 10007.06027 | 3974.915425 | 10621.92921 | 2725.935076 | 0.857988483   | 1.171724622  | 0.9521852 |
| <b>C6UV05</b> | TY-2482_chromosome | - | 664795 | 665436 | 213.879836   | 223.54793   | 199.1986918 | 134.3124654 | 170.2660363 | 147.4272163 | 0.482975991   | 1.865262849  | 1.5546114 |
| <b>C6USS4</b> | TY-2482_chromosome | - | 665436 | 665828 | 34.88284558  | 49.84834727 | 41.56953798 | 45.21262256 | 41.79508672 | 53.67051545 | -0.200961254  | 0.271398139  | 0.2030057 |
| <b>C8U729</b> | TY-2482_chromosome | - | 665847 | 666614 | 63.61846681  | 55.16757161 | 63.44679399 | 58.32250579 | 63.72525591 | 60.55539904 | 0.040401914   | 0            | 0         |
| <b>B7MPV9</b> | TY-2482_chromosome | - | 666643 | 667380 | 25.981666572 | 30.77219214 | 32.51102001 | 31.39479504 | 29.05309994 | 39.16230018 | -0.134350165  | 0.215967629  | 0.1594413 |
| <b>B7MPV8</b> | TY-2482_chromosome | - | 667390 | 668469 | 50.95278518  | 37.95415452 | 51.66812765 | 41.26090297 | 41.8405807  | 45.93861519 | 0.213371582   | 0.224259062  | 0.1659191 |
| <b>P03034</b> | TY-2482_chromosome | + | 669459 | 670169 | 2277.01618   | 2536.678414 | 2462.693318 | 1528.206587 | 1606.283135 | 1397.411073 | 0.652058281   | 2.06349227   | 1.7277681 |
| <b>B7MPV3</b> | TY-2482_chromosome | + | 670219 | 670758 | 1116.34157   | 1274.398439 | 1230.707503 | 856.5954572 | 799.0271366 | 712.0334707 | 0.562087223   | 2.770366345  | 2.357273  |
| <b>B7MPV2</b> | TY-2482_chromosome | + | 670749 | 671522 | 1461.132347  | 1688.637365 | 1501.915069 | 1123.932199 | 1135.825452 | 801.7932009 | 0.514932111   | 2.295797588  | 1.935305  |
| <b>C8U8P7</b> | TY-2482_chromosome | + | 674945 | 677014 | 145.8084444  | 161.1445193 | 131.766601  | 76.20248791 | 72.78047068 | 75.00717393 | 0.917245475   | 5.732117244  | 5.0668486 |
| <b>Q9LA41</b> | TY-2482_chromosome | + | 677316 | 678098 | 50.43770202  | 75.84790792 | 72.85529483 | 62.87136147 | 56.3192829  | 82.39750524 | -0.02571271   | 0.021714374  | 0.0147118 |
| <b>C6V295</b> | TY-2482_chromosome | + | 678098 | 678775 | 58.15645974  | 68.89176985 | 65.39213104 | 57.2755259  | 38.05353045 | 65.33781031 | 0.250002315   | 0.517427549  | 0.3979105 |
| <b>C8TPU7</b> | TY-2482_chromosome | + | 678826 | 679074 | 22.3724663   | 21.28673567 | 25.22150155 | 25.30526522 | 29.10462338 | 35.22524022 | -0.304179593  | 0.64646837   | 0.5048463 |
| <b>C8U2L7</b> | TY-2482_chromosome | + | 679339 | 680499 | 400.6851088  | 465.2191252 | 420.4888983 | 510.4384056 | 373.9785194 | 308.4473912 | -0.007957226  | 0.198192534  | 0.1462425 |
| <b>A1ABD5</b> | TY-2482_chromosome | + | 680851 | 681942 | 149.8826039  | 219.7073927 | 202.849197  | 193.071585  | 208.4590695 | 172.6151521 | -0.077076636  | 0.00836676   | 0.0054068 |
| <b>B7L5E3</b> | TY-2482_chromosome | + | 681988 | 682599 | 255.523976   | 298.3628092 | 303.8602699 | 445.8892183 | 441.3600768 | 449.94173   | -0.652295711  | 2.791576162  | 2.3755848 |
| <b>B7L5E4</b> | TY-2482_chromosome | + | 682797 | 684050 | 302.703335   | 344.573819  | 332.7855575 | 80.66423208 | 74.54826146 | 95.72969164 | 1.968316367   | 19.33141122  | 18.064763 |
| <b>B7L5E5</b> | TY-2482_chromosome | - | 684009 | 684707 | 1600.93813   | 1764.318303 | 1833.616498 | 182.9729708 | 145.5438353 | 146.2468396 | 3.412433728   | 55.79974764  | 53.783855 |
| <b>B7L5E6</b> | TY-2482_chromosome | - | 684829 | 686046 | 1023.14711   | 976.2525667 | 904.9654367 | 797.4791749 | 639.6594158 | 774.785815  | 0.376920871   | 1.360932782  | 1.1152221 |
| <b>B7L5E7</b> | TY-2482_chromosome | - | 686184 | 687074 | 106.8822803  | 122.3717329 | 99.44312198 | 78.40938797 | 56.29476764 | 76.14888781 | 0.578196993   | 2.545166561  | 2.1560338 |
| <b>B7L5E8</b> | TY-2482_chromosome | + | 687181 | 688431 | 441.28448    | 430.144495  | 404.5576486 | 245.4057584 | 262.0862047 | 280.0774281 | 0.708377786   | 3.281747365  | 2.8090756 |
| <b>B7L5F0</b> | TY-2482_chromosome | + | 689442 | 690260 | 900.160817   | 1060.573681 | 1045.912919 | 343.1844001 | 413.2290644 | 374.9912934 | 1.403898568   | 11.11623988  | 10.135413 |
| <b>B7L5F1</b> | TY-2482_chromosome | - | 690305 | 690631 | 150.1401962  | 174.4327378 | 165.0667385 | 55.0092637  | 98.40557661 | 95.70393452 | 1.025324114   | 4.857070117  | 4.2442196 |
| <b>B7L5F2</b> | TY-2482_chromosome | - | 690621 | 690983 | 133.7851851  | 139.1190942 | 140.6572027 | 62.22803457 | 96.48347499 | 121.6387433 | 0.657591853   | 1.929888305  | 1.6101928 |
| <b>B7L5F3</b> | TY-2482_chromosome | + | 691395 | 692426 | 404.4254426  | 472.8354977 | 420.4646169 | 61.18923026 | 56.40182973 | 55.36700987 | 2.849569673   | 38.22804514  | 36.527741 |
| <b>B7L5F4</b> | TY-2482_chromosome | - | 692457 | 693842 | 2607.678563  | 2622.32771  | 2646.216327 | 2637.256272 | 2245.860476 | 0.072702293 | -0.027166747  | 0.072702293  | 0.0524445 |
| <b>B7L5F5</b> | TY-2482_chromosome | - | 693856 | 695385 | 2452.74706   | 2645.398521 | 2783.038506 | 3209.410791 | 2390.511974 | 3963.281939 | -0.243103818  | 0.353792302  | 0.2673183 |
| <b>B7L5F6</b> | TY-2482_chromosome | + | 695909 | 696850 | 1272.058072  | 1315.872776 | 1219.972898 | 2683.87233  | 2489.805276 | 3270.189941 | -1.135378954  | 4.688741542  | 4.0908484 |
| <b>B7L5F7</b> | TY-2482_chromosome | + | 697039 | 698418 | 267.1508921  | 220.9288034 | 244.9228355 | 395.9504117 | 400.4166204 | 402.5852482 | -0.668681911  | 3.328947168  | 2.8513238 |
| <b>B7L5F8</b> | TY-2482_chromosome | + | 698458 | 699177 | 322.1778625  | 347.6501298 | 355.956216  | 250.543797  | 287.5876905 | 303.7164021 | 0.311938922   | 0.793935065  | 0.6304112 |
| <b>B7L5F9</b> | TY-2482_chromosome | - | 699180 | 699512 | 125.4550028  | 141.4126517 | 144.0444895 | 94.26830006 | 118.3833409 | 103.9934705 | 0.382587555   | 1.189162475  | 0.9653427 |
| <b>D3GTJ4</b> | TY-2482_chromosome | + | 699605 | 700357 | 217.8307712  | 186.2000274 | 183.3420822 | 329.3786297 | 380.4280254 | 382.7348293 | -0.855836082  | 4.996157051  | 4.373041  |
| <b>B7L5G1</b> | TY-2482_chromosome | + | 700364 | 701662 | 299.1264162  | 308.745591  | 285.0769314 | 353.6605306 | 411.3704099 | 415.6109832 | -0.3954416628 | 1.347041959  | 1.1031705 |
| <b>B7L5G2</b> | TY-2482_chromosome | + | 701741 | 702667 | 189.9986044  | 178.2338978 | 182.8425251 | 106.8625275 | 100.9333641 | 133.7890242 | 0.73555872    | 3.253656316  | 2.7846424 |
| <b>B7L5G3</b> | TY-2482_chromosome | - | 702670 | 704070 | 477.477592   | 655.2537638 | 613.4905712 | 379.0243772 | 280.1235377 | 432.3540684 | 0.64815648    | 2.668508714  | 2.2673213 |
| <b>B7L5G4</b> | TY-2482_chromosome | - | 704216 | 705859 | 3060.854292  | 3039.869085 | 3206.832073 | 2940.367144 | 2441.580183 | 2803.526035 | 0.186443734   | 0.220666064  | 0.1632718 |
| <b>B7L5G5</b> | TY-2482_chromosome | + | 706058 | 707230 | 1415.570505  | 1424.892305 | 1542.445249 | 1397.559755 | 1129.273471 | 1424.541881 | 0.209962164   | 0.4231546    | 0.3225175 |
| <b>B7L5G6</b> | TY-2482_chromosome | + | 707334 | 708839 | 5390.316415  | 5366.147043 | 6074.380398 | 5626.123706 | 4871.392122 | 6480.337049 | 0.034284596   | 0.011579738  | 0.007653  |
| <b>B7L5G9</b> | TY-2482_chromosome | - | 711564 | 713372 | 25.27449435  | 24.27876213 | 33.35702398 | 46.55396303 | 26.24456034 | 35.58393499 | -0.375531424  | 0.696397438  | 0.5469619 |
| <b>B7L5H0</b> | TY-2482_chromosome | - | 713764 | 714351 | 441.9055712  | 503.470035  | 411.7079912 | 185.5995533 | 176.4522623 | 245.4894587 | 1.14887843    | 7.176734946  | 6.4111511 |
| <b>B7L5H1</b> | TY-2482_chromosome | - | 714583 | 715347 | 669.5629196  | 585.0937326 | 534.4670687 | 415.0240585 | 443.2400386 | 385.6841237 | 0.513996967   | 1.9786187307 | 1.6600874 |
| <b>B7L5H2</b> | TY-2482_chromosome | - | 715462 | 716487 | 384.9498283  | 492.3189008 | 380.0100802 | 426.5738232 | 333.8974419 | 369.7636102 | 0.046053923   | 0.316505009  | 0.237514  |
| <b>B7L5H3</b> | TY-2482_chromosome | + | 716662 | 718251 | 360.7431992  | 279.7453965 | 304.9045201 | 320.1413675 | 235.5692058 | 302.4684363 | 0.169859885   | 0.292039787  | 0.2182677 |
| <b>B7L5H4</b> | TY-2482_chromosome | + | 718264 | 719433 | 457.1198794  | 367.3931917 | 422.5653471 | 368.1835752 | 342.0692115 | 483.5850148 | 0.155836704   | 0.116773651  | 0.0857147 |
| <b>B7L5H5</b> | TY-2482_chromosome | + | 719540 | 720538 | 1692.436944  | 1617.761668 | 1549.415911 | 2198.290811 | 2512.634182 | 2932.108592 | -0.608941955  | 1.751925597  | 1.4578807 |
| <b>B7L5H6</b> | TY-2482_chromosome | - | 720579 | 721616 | 952.7182919  | 884.6265022 | 1029.505071 | 2319.470949 | 2330.623547 | 2441.717018 | -1.261777523  | 9.642532004  | 8.7336948 |
| <b>B7L5H7</b> | TY-2482_chromosome | + | 721784 | 721981 | 340.4293507  | 289.5801509 | 308.9220502 | 30.52294215 | 56.74106612 | 20.46547576 | 3.120312069   | 32.39507612  | 30.849674 |
| <b>D6JA38</b> | TY-2482_chromosome | + | 722073 | 722333 | 192.132704   | 191.05913   | 204.7668196 | 23.56790938 | 55.79670735 | 31.84666023 | 2.452697485   | 22.68850525  | 21.340913 |
| <b>B7L5H8</b> | TY-2482_chromosome | + | 722257 | 722469 | 105.2354248  | 123.1586667 | 122.9114698 | 27.9541294  | 38.31484966 | 30.38255204 | 1.855113388   | 15.30879055  | 14.158254 |
| <b>B7L5H9</b> | TY-2482_chromosome | + | 722558 | 722995 | 212.1825338  | 268.654654  | 221.0062424 | 145.7751534 | 240.4298837 | 193.4169087 | 0.253133508   | 0.659434345  | 0.5158301 |
| <b>B7L5I0</b> | TY-2482_chromosome | + | 723075 | 723653 | 105.3203934  | 127.2797894 | 103.4455296 | 468.2844039 | 471.4220832 | 433.0050893 | -2.101888892  | 20.12109864  | 18.830969 |

|               |                    |   |        |        |             |             |             |             |             |             |              |             |           |
|---------------|--------------------|---|--------|--------|-------------|-------------|-------------|-------------|-------------|-------------|--------------|-------------|-----------|
| <b>B7L5I1</b> | TY-2482_chromosome | + | 723656 | 724231 | 124.9699059 | 97.42145892 | 131.6467563 | 508.2153847 | 535.1261436 | 514.4565207 | -2.058588663 | 21.96385259 | 20.634921 |
| <b>B7L5I2</b> | TY-2482_chromosome | + | 724227 | 726446 | 570.7314709 | 495.6103633 | 532.7779231 | 1561.278871 | 1761.835385 | 2080.894651 | -1.68066462  | 15.47996522 | 14.320307 |
| <b>B7L5I3</b> | TY-2482_chromosome | + | 726450 | 727505 | 513.2237737 | 441.2455161 | 438.2070831 | 1001.098331 | 1138.457446 | 1319.187118 | -1.25112965  | 9.922299165 | 8.9945423 |
| <b>B7L5I4</b> | TY-2482_chromosome | + | 727512 | 728129 | 602.1147829 | 521.5344595 | 582.366439  | 854.8543378 | 922.7964412 | 949.7784504 | -0.623713429 | 3.134133992 | 2.6775524 |
| <b>A7ZM93</b> | TY-2482_chromosome | - | 728423 | 729130 | 542.8951091 | 541.1874906 | 555.9382211 | 693.6297288 | 610.5816707 | 672.2509237 | -0.270200651 | 0.741077834 | 0.5851143 |
| <b>B7L5I7</b> | TY-2482_chromosome | + | 730077 | 731576 | 2886.730526 | 2615.337427 | 2806.008579 | 3160.142245 | 3127.833359 | 3171.95761  | -0.162586696 | 0.224024804 | 0.1658697 |
| <b>B7L5I8</b> | TY-2482_chromosome | + | 731685 | 732287 | 541.9564771 | 630.5420244 | 629.9784603 | 506.6132709 | 549.6270788 | 677.0951331 | 0.086668233  | 0.10173543  | 0.0746446 |
| <b>B7L5I9</b> | TY-2482_chromosome | - | 732337 | 733197 | 667.7097665 | 720.8992957 | 702.4850615 | 1386.938969 | 1352.300359 | 1474.693732 | -1.015116048 | 6.197451177 | 5.4923481 |
| <b>B7L5J0</b> | TY-2482_chromosome | - | 733259 | 734530 | 2834.136935 | 3065.272166 | 3243.236916 | 6394.028898 | 5607.674369 | 6128.1217   | -0.993487497 | 2.101012124 | 1.7609808 |
| <b>B7L5J1</b> | TY-2482_chromosome | - | 734662 | 735315 | 631.097131  | 639.1295095 | 675.512727  | 849.1714228 | 771.6593653 | 881.3339577 | -0.348669806 | 1.166919695 | 0.9481711 |
| <b>B7L5J2</b> | TY-2482_chromosome | - | 735377 | 735703 | 102.5499133 | 86.2908272  | 99.75059006 | 205.6651742 | 235.847548  | 145.3600648 | -1.024919198 | 5.486304979 | 4.8278271 |
| <b>B7L5J3</b> | TY-2482_chromosome | - | 735804 | 736910 | 465.9411291 | 415.9070933 | 477.4742489 | 1163.383293 | 928.16223   | 1034.120166 | -1.185219335 | 8.515283463 | 7.6614387 |
| <b>E7URP8</b> | TY-2482_chromosome | + | 737184 | 737896 | 6464.958354 | 6568.801812 | 7178.240873 | 3272.749572 | 3892.322261 | 3958.523798 | 0.908461388  | 1.650668925 | 1.3686295 |
| <b>B7L5J6</b> | TY-2482_chromosome | + | 738333 | 738566 | 58.86662524 | 82.54868323 | 59.82702558 | 68.57477024 | 65.5633651  | 47.82176757 | -0.000863341 | 0.215711659 | 0.1592937 |
| <b>B7L5J7</b> | TY-2482_chromosome | + | 738572 | 739426 | 111.5108109 | 110.4076878 | 96.13444116 | 159.6004779 | 173.8896742 | 137.1547249 | -0.608503461 | 2.348686877 | 1.9820402 |
| <b>B7L5J8</b> | TY-2482_chromosome | + | 739429 | 741438 | 294.7480083 | 268.4830148 | 272.5868173 | 306.6417406 | 318.5339263 | 301.3652496 | -0.13760449  | 0.331863488 | 0.2494348 |
| <b>B7L5J9</b> | TY-2482_chromosome | - | 741445 | 741963 | 329.7756519 | 292.6169726 | 365.3921566 | 517.6174955 | 488.6835108 | 472.4422029 | -0.543416693 | 2.326272682 | 1.9629337 |
| <b>B7L5K0</b> | TY-2482_chromosome | - | 742047 | 742940 | 780.5878329 | 842.2783747 | 876.9176821 | 1651.816857 | 1608.989113 | 1413.246086 | -0.927218161 | 4.963909502 | 4.343978  |
| <b>B7L5K1</b> | TY-2482_chromosome | - | 742992 | 743399 | 119.4783848 | 152.6018619 | 119.9343107 | 43.98668663 | 51.97514976 | 34.61585138 | 1.48237707   | 11.52790773 | 10.529428 |
| <b>C8UB70</b> | TY-2482_chromosome | + | 743331 | 743927 | 44.55669352 | 62.96837893 | 56.86202476 | 71.40631668 | 79.19396901 | 77.60186538 | -0.514162083 | 1.44473749  | 1.1874812 |
| <b>B7L5K3</b> | TY-2482_chromosome | + | 743967 | 745061 | 378.289526  | 376.8375903 | 433.3556933 | 1207.002717 | 1034.606767 | 1417.806626 | -1.569728546 | 14.28917547 | 13.173898 |
| <b>B7L5K4</b> | TY-2482_chromosome | + | 745145 | 745549 | 1194.801293 | 1393.055485 | 1417.679519 | 1103.138    | 1210.398254 | 1152.511679 | 0.203053659  | 0.516954452 | 0.3975627 |
| <b>B7L5K5</b> | TY-2482_chromosome | + | 745655 | 746299 | 229.0181507 | 199.046366  | 197.8991425 | 414.6063416 | 516.950434  | 527.3596549 | -1.167009062 | 8.222367427 | 7.3812477 |
| <b>B7L5K6</b> | TY-2482_chromosome | + | 746395 | 747085 | 636.5292821 | 559.9192233 | 596.8179363 | 571.2748594 | 516.8192742 | 654.8553562 | 0.088289459  | 0.074858095 | 0.0541017 |
| <b>B7L5K7</b> | TY-2482_chromosome | - | 751065 | 751409 | 2102.131346 | 2396.436481 | 1876.682861 | 967.8716759 | 1642.821262 | 1393.141873 | 0.663509711  | 2.557014502 | 2.1667146 |
| <b>B7L5K8</b> | TY-2482_chromosome | + | 751743 | 752555 | 162.2013465 | 184.3354649 | 156.2736627 | 191.7803334 | 174.6694508 | 199.8508443 | -0.212152049 | 0.417921235 | 0.3184822 |
| <b>B7L5K9</b> | TY-2482_chromosome | + | 752686 | 753264 | 10842.23932 | 10146.61676 | 10250.73187 | 5424.375273 | 6143.809986 | 5578.299102 | 0.880741923  | 1.598767981 | 1.3232377 |
| <b>B7L5L0</b> | TY-2482_chromosome | - | 753416 | 754582 | 144.9580667 | 154.5529106 | 159.2008698 | 282.3240894 | 266.5871338 | 310.2919821 | -0.892053346 | 5.077654685 | 4.4497175 |
| <b>D6JAZ2</b> | TY-2482_chromosome | + | 754924 | 755145 | 162.3973345 | 171.1876635 | 124.2828042 | 117.9456037 | 158.5012847 | 112.1696236 | 0.169246515  | 0.538895924 | 0.4159365 |
| <b>B7L5L1</b> | TY-2482_chromosome | + | 755136 | 756158 | 543.6871088 | 488.1274891 | 575.9115427 | 1086.268813 | 1042.898989 | 1051.225551 | -0.947434173 | 6.329522899 | 5.6156458 |
| <b>B7L5L2</b> | TY-2482_chromosome | - | 756161 | 757090 | 159.9099762 | 153.2112794 | 192.4857337 | 140.2247528 | 165.6610377 | 165.6580982 | 0.173285641  | 0.217590839 | 0.1606308 |
| <b>B7L5L3</b> | TY-2482_chromosome | + | 757203 | 758411 | 223.8237954 | 164.5363849 | 210.7276914 | 145.6764806 | 134.6066183 | 172.0160541 | 0.504347437  | 1.330629261 | 1.0889214 |
| <b>B7L5L4</b> | TY-2482_chromosome | + | 758705 | 759850 | 1177.698307 | 1272.359377 | 1304.721234 | 1876.332904 | 1684.441452 | 1893.082597 | -0.541995299 | 2.103583676 | 1.7633246 |
| <b>B7L5L5</b> | TY-2482_chromosome | - | 759896 | 760534 | 1110.385493 | 1251.209814 | 1192.37563  | 961.9863476 | 1200.51836  | 812.234195  | 0.212987067  | 0.634908171 | 0.495128  |
| <b>B7L5L6</b> | TY-2482_chromosome | + | 760749 | 762119 | 386.6359909 | 401.3103669 | 359.6328194 | 365.6619759 | 362.1585519 | 411.5902393 | 0.003678804  | 0.014894255 | 0.0097252 |
| <b>B7L5L7</b> | TY-2482_chromosome | - | 762166 | 763419 | 1032.548812 | 1176.800811 | 1201.106449 | 1081.538371 | 960.9088649 | 1270.492099 | 0.056989989  | 0.074002283 | 0.0532457 |
| <b>valV</b>   | TY-2482_chromosome | + | 763727 | 763803 | 80.43915701 | 66.79243039 | 47.57044416 | 18.48189164 | 46.80245606 | 13.8600282  | 1.253992568  | 4.106897357 | 3.558478  |
| <b>valW</b>   | TY-2482_chromosome | + | 763808 | 763884 | 97.57615549 | 80.14053171 | 66.21144739 | 23.77095257 | 52.20801135 | 20.34744171 | 1.324929629  | 5.408764567 | 4.7554569 |
| <b>Q1RBD0</b> | TY-2482_chromosome | + | 763840 | 764265 | 487.5245575 | 527.3977299 | 480.5213887 | 278.0984761 | 378.730474  | 287.0550793 | 0.644737889  | 2.777354669 | 2.3632749 |
| <b>B7L5L9</b> | TY-2482_chromosome | + | 764423 | 766024 | 346.9156581 | 338.2446484 | 385.778758  | 298.9881047 | 270.2549146 | 267.2040241 | 0.365624883  | 1.115268083 | 0.9018379 |
| <b>B7L5M0</b> | TY-2482_chromosome | - | 766042 | 766851 | 81.50352768 | 89.20928827 | 73.6967435  | 59.57809056 | 74.72583202 | 56.82495685 | 0.306506254  | 0.920251251 | 0.7354133 |
| <b>B7L5M1</b> | TY-2482_chromosome | - | 766858 | 767640 | 65.10628494 | 64.29578731 | 59.26218191 | 43.88945504 | 44.57210824 | 48.57683115 | 0.46188431   | 1.382297069 | 1.1337287 |
| <b>E6AKY5</b> | TY-2482_chromosome | - | 767640 | 769016 | 65.71037191 | 71.81106247 | 69.315602   | 54.21165146 | 37.19585038 | 47.34628093 | 0.536020936  | 1.831355264 | 1.5251562 |
| <b>B7L5M5</b> | TY-2482_chromosome | - | 769023 | 771122 | 102.9087192 | 135.2011205 | 124.1821977 | 48.06384541 | 40.89357706 | 46.02998281 | 1.368911589  | 9.805737787 | 8.8852219 |
| <b>B7L5M6</b> | TY-2482_chromosome | - | 771146 | 771769 | 64.87282761 | 81.17835371 | 70.57845951 | 12.15856841 | 9.089630253 | 5.606073472 | 2.871993619  | 22.51410437 | 21.168626 |
| <b>B7L5M7</b> | TY-2482_chromosome | + | 772228 | 772434 | 233.770708  | 312.4360555 | 270.6586376 | 56.89316457 | 103.2622544 | 26.07015078 | 2.008477116  | 12.24437153 | 11.20724  |
| <b>B7L5M8</b> | TY-2482_chromosome | + | 772991 | 774400 | 3748.887096 | 3622.237802 | 3918.588207 | 10549.78159 | 8760.963951 | 10679.99749 | -1.390691279 | 3.543244965 | 3.0446679 |
| <b>B7L5M9</b> | TY-2482_chromosome | + | 774714 | 774947 | 131948.9959 | 106812.5083 | 108978.1624 | 61130.27048 | 177442.5648 | 52096.88567 | 0.286727263  | 0.224738553 | 0.1661481 |
| <b>B7L5N0</b> | TY-2482_chromosome | - | 775017 | 776018 | 884.6592185 | 853.2778311 | 931.70041   | 981.9314783 | 823.5002664 | 994.4521426 | -0.047936481 | 0.139378257 | 0.1025575 |
| <b>B7L5N1</b> | TY-2482_chromosome | - | 776170 | 776583 | 100.5154393 | 173.730291  | 119.2636641 | 413.6639194 | 358.4448174 | 488.9919011 | -1.795995811 | 12.30616614 | 11.263821 |
| <b>B7L5N2</b> | TY-2482_chromosome | - | 776599 | 777816 | 367.8746526 | 376.1696499 | 381.6364179 | 1586.248431 | 1103.708224 | 1658.614846 | -1.945461135 | 19.48633411 | 18.214378 |
| <b>B7L5N3</b> | TY-2482_chromosome | - | 777816 | 779084 | 515.9794273 | 502.8016373 | 534.85601   | 1676.065752 | 1172.850228 | 1970.178209 | -1.593424896 | 12.30466223 | 11.263365 |
| <b>B7L5N4</b> | TY-2482_chromosome | - | 779062 | 779805 | 333.3058409 | 398.4097861 | 381.6716339 | 989.939294  | 669.6001658 | 1054.689742 | -1.306979989 | 8.169593455 | 7.333722  |
| <b>B7L5N5</b> | TY-2482_chromosome | - | 779818 | 781306 | 695.2897487 | 787.8299176 | 795.6946697 | 1220.126663 | 916.2233641 | 1576.673085 | -0.673654006 | 2.862993238 | 2.4384179 |
| <b>B7L5N6</b> | TY-2482_chromosome | - | 781314 | 781679 | 233.7748909 | 287.8289612 | 292.0166376 | 241.5557997 | 185.4634343 | 322.882759  | 0.145608072  | 0.221112576 | 0.1636097 |
| <b>B7L5N8</b> | TY-2482_chromosome | - | 782519 | 782926 | 234.7704306 | 229.8215742 | 249.6749848 | 293.5468124 | 255.6274328 | 325.9878747 | -0.259763978 | 0.820962031 | 0.6531182 |
| <b>B7L5N9</b> | TY-2482_chromosome | - | 782926 | 785979 | 1074.485256 | 1207.489828 | 1164.005593 | 2041.802578 | 1698.035964 | 2244.116623 | -0.802915939 | 3.927732965 | 3.3935432 |

|               |                    |   |        |        |             |             |             |             |             |              |              |             |           |
|---------------|--------------------|---|--------|--------|-------------|-------------|-------------|-------------|-------------|--------------|--------------|-------------|-----------|
| <b>B7L5P0</b> | TY-2482_chromosome | + | 786368 | 787477 | 477.0109892 | 512.3406429 | 505.0924481 | 619.678438  | 691.6490284 | 718.1846672  | -0.428274109 | 1.512907362 | 1.2460828 |
| <b>B7L5P4</b> | TY-2482_chromosome | + | 791083 | 791946 | 34.21665814 | 42.90795126 | 38.95893365 | 48.68041275 | 45.48391946 | 44.82357744  | -0.310762723 | 0.522729213 | 0.4022316 |
| <b>B7L5P5</b> | TY-2482_chromosome | + | 791980 | 792735 | 174.3258157 | 172.2661276 | 152.2641264 | 252.9743067 | 290.2562516 | 382.2224308  | -0.84541899  | 4.431238761 | 3.8584685 |
| <b>B7L5P7</b> | TY-2482_chromosome | + | 794491 | 795639 | 16.44712974 | 17.67510477 | 15.05203064 | 49.70927716 | 36.3349602  | 35.77588391  | -1.383407422 | 4.991497427 | 4.3687807 |
| <b>B7L5P8</b> | TY-2482_chromosome | - | 795688 | 796596 | 29.03623437 | 35.24099114 | 30.97471742 | 28.18926184 | 36.53789785 | 20.21269433  | 0.090637622  | 0.21622953  | 0.1595948 |
| <b>B7L6H2</b> | TY-2482_chromosome | + | 798690 | 799976 | 29.28797758 | 26.04190321 | 24.24370159 | 32.51720648 | 12.57808131 | 16.12189503  | 0.277660262  | 0.565752877 | 0.4378464 |
| <b>B7L6H4</b> | TY-2482_chromosome | + | 800272 | 801969 | 50.69434718 | 73.9821096  | 44.43399344 | 61.25473497 | 54.57711233 | 52.77947829  | -0.155480233 | 0.0125489   | 0.0081495 |
| <b>B7L6H5</b> | TY-2482_chromosome | - | 802032 | 804407 | 10171.54117 | 8851.312864 | 8928.86509  | 14476.61576 | 14183.98443 | 18240.55478  | -0.691016055 | 1.198147713 | 0.9725719 |
| <b>B7L6H6</b> | TY-2482_chromosome | + | 805570 | 805570 | 856.0857939 | 950.3075397 | 982.5691798 | 1109.828418 | 998.2404389 | 1232.46253   | -0.249190289 | 0.687025572 | 0.539296  |
| <b>B7L6H7</b> | TY-2482_chromosome | + | 805730 | 806773 | 351.4834456 | 360.2968275 | 333.269873  | 686.7557201 | 666.0893725 | 820.6051846  | -1.045309123 | 6.553972941 | 5.8265934 |
| <b>B5YPZ3</b> | TY-2482_chromosome | + | 806881 | 807096 | 224.4288471 | 206.6361645 | 211.2080332 | 890.1118544 | 787.1613523 | 765.8736352  | -1.938937299 | 19.34210693 | 18.073696 |
| <b>B7L6H9</b> | TY-2482_chromosome | - | 807106 | 808539 | 1637.809211 | 1543.457323 | 1594.443195 | 6215.877674 | 6055.45457  | 6396.468598  | -1.949620153 | 6.755133234 | 6.0138179 |
| <b>B7L6I0</b> | TY-2482_chromosome | - | 808605 | 809315 | 200.839009  | 264.0198925 | 249.0170159 | 242.2735595 | 310.5249082 | 180.8997196  | -0.115639797 | 0.066635023 | 0.0474726 |
| <b>B7L6I1</b> | TY-2482_chromosome | - | 809565 | 810026 | 496.6873362 | 446.2900465 | 453.4782113 | 340.3424165 | 551.7603018 | 334.6554369  | 0.205925068  | 0.38720401  | 0.2937062 |
| <b>B7L6I2</b> | TY-2482_chromosome | - | 810107 | 810853 | 669.2316536 | 700.5424696 | 699.2009964 | 781.4036728 | 813.5907816 | 807.7908042  | -0.21569458  | 0.565475375 | 0.4377364 |
| <b>B7L6I3</b> | TY-2482_chromosome | - | 810856 | 811404 | 749.1708176 | 786.0356315 | 873.0602181 | 1140.7492   | 1103.871441 | 1126.186573  | -0.472003802 | 1.958204708 | 1.634718  |
| <b>B7L6I4</b> | TY-2482_chromosome | - | 811470 | 812447 | 528.022181  | 500.1347669 | 506.3423026 | 402.9354405 | 496.0602324 | 434.2395019  | 0.22459484   | 0.502782846 | 0.3865114 |
| <b>D3QUK6</b> | TY-2482_chromosome | - | 812640 | 813032 | 213.3591808 | 367.270651  | 280.5206642 | 94.33852488 | 140.4032482 | 71.72379629  | 1.34143573   | 8.218298796 | 7.3784971 |
| <b>B2U362</b> | TY-2482_chromosome | - | 813046 | 814167 | 307.0720297 | 429.9776755 | 325.910886  | 146.8711751 | 137.4736617 | 92.72012685  | 1.334238096  | 10.23871576 | 9.3011807 |
| <b>C8T5I7</b> | TY-2482_chromosome | - | 814070 | 814378 | 158.4259627 | 196.2526272 | 146.893863  | 41.20031888 | 53.81328917 | 37.15998452  | 1.831136846  | 16.96360467 | 15.760625 |
| <b>B3Y106</b> | TY-2482_chromosome | + | 816915 | 817529 | 400.0169212 | 323.8402554 | 189.138681  | 68.48921366 | 239.1104864 | 70.70348241  | 1.23228449   | 3.538366035 | 3.0403884 |
| <b>B7L7X3</b> | TY-2482_chromosome | + | 820832 | 821788 | 1701.962417 | 1117.377769 | 379.3603377 | 210.9117004 | 819.0683653 | 133.0113489  | 1.374720159  | 2.810197809 | 2.3921496 |
| <b>B7L7X4</b> | TY-2482_chromosome | + | 821796 | 822107 | 195.6502286 | 123.7200547 | 50.80799515 | 51.18010163 | 135.2934101 | 28.75944832  | 0.703140685  | 1.287301898 | 1.0506977 |
| <b>B7L7X5</b> | TY-2482_chromosome | + | 822130 | 822558 | 20.01884026 | 23.20961328 | 25.25210279 | 29.34350594 | 29.06355028 | 39.11798025  | -0.468970377 | 1.018516212 | 0.8181418 |
| <b>B7L7Y0</b> | TY-2482_chromosome | + | 826257 | 827123 | 55.07753125 | 64.48566844 | 72.9292867  | 23.01787887 | 19.04144426 | 24.84755553  | 1.537044921  | 8.340820436 | 7.4957224 |
| <b>B7L7Y2</b> | TY-2482_chromosome | + | 827150 | 828199 | 75.56141782 | 63.34948301 | 80.08135916 | 22.84557303 | 20.85913306 | 29.92134875  | 1.6612779    | 9.297922613 | 8.4057328 |
| <b>B7L7Y9</b> | TY-2482_chromosome | + | 831102 | 832979 | 115.2263422 | 96.81803262 | 118.336298  | 94.60200584 | 75.40927463 | 107.5223143  | 0.321400518  | 0.687787871 | 0.5396531 |
| <b>C8TT11</b> | TY-2482_chromosome | + | 836452 | 838581 | 91.19745643 | 92.78591079 | 92.41383467 | 90.03752281 | 77.27621786 | 93.26536426  | 0.086059017  | 0.1657653   | 0.1220541 |
| <b>C8UR26</b> | TY-2482_chromosome | + | 838584 | 839159 | 41.00946922 | 35.28014731 | 53.27535172 | 44.31620184 | 59.23566    | 51.34411225  | -0.154848538 | 0.462349747 | 0.3533548 |
| <b>E7HLF3</b> | TY-2482_chromosome | - | 839209 | 839811 | 40.98822237 | 37.53869383 | 53.23668347 | 8.576748814 | 13.83842706 | 0.375467099  | 2.462803599  | 12.28396767 | 11.244758 |
| <b>B7L800</b> | TY-2482_chromosome | - | 840439 | 843252 | 47.72211959 | 55.97027943 | 51.47231346 | 59.20325854 | 49.06072612 | 60.3893634   | -0.150370437 | 0.214392074 | 0.1587116 |
| <b>C8U9X1</b> | TY-2482_chromosome | - | 843397 | 843759 | 26.15043762 | 29.99201315 | 23.55775519 | 29.08690565 | 42.7410266  | -0.192067055 | 0.305573982  | 0.2287462   |           |
| <b>C8UBG3</b> | TY-2482_chromosome | - | 843817 | 844326 | 31.32860381 | 39.60846775 | 28.7910416  | 27.54159932 | 29.13890932 | 26.41647253  | 0.17909919   | 0.385412806 | 0.2923868 |
| <b>B7L804</b> | TY-2482_chromosome | - | 844329 | 845510 | 51.56473156 | 51.71835156 | 52.82507714 | 21.43918117 | 20.86116918 | 31.14365768  | 1.138160996  | 4.424961029 | 3.8530419 |
| <b>POCE57</b> | TY-2482_chromosome | + | 849273 | 849273 | 257.3517814 | 264.3703835 | 210.880362  | 146.2644429 | 139.1581082 | 181.1618828  | 0.638921954  | 2.704114791 | 2.3005239 |
| <b>Q1RE18</b> | TY-2482_chromosome | - | 849730 | 849989 | 4695.349049 | 3658.736184 | 3448.020825 | 1742.007504 | 4397.952548 | 1642.84088   | 0.626708588  | 0.847061243 | 0.6744294 |
| <b>B7L6I5</b> | TY-2482_chromosome | - | 850366 | 850662 | 4570.791949 | 4356.347422 | 4652.729322 | 4290.161212 | 5250.19286  | 4262.8179    | -0.003989014 | 0.022554348 | 0.0152692 |
| <b>B7L6I6</b> | TY-2482_chromosome | - | 850670 | 853054 | 12865.03885 | 12912.72576 | 13057.46223 | 15785.97526 | 12099.91499 | 15401.74167  | -0.162089071 | 0.157041844 | 0.1149545 |
| <b>B7L6I7</b> | TY-2482_chromosome | - | 853072 | 854057 | 2532.1336   | 2516.958019 | 2645.625908 | 4417.397131 | 3336.110364 | 4349.23201   | -0.648930306 | 1.147538302 | 0.9305156 |
| <b>B7L6I9</b> | TY-2482_chromosome | - | 854505 | 854858 | 26047.32851 | 22794.57645 | 25333.25652 | 22450.70732 | 24783.48205 | 22260.33647  | 0.128474793  | 0.086849615 | 0.0635905 |
| <b>A1ABQ1</b> | TY-2482_chromosome | + | 854980 | 855588 | 44049.20401 | 41309.23449 | 45899.64611 | 39304.98191 | 39835.68242 | 39893.40031  | 0.170728439  | 0.133316209 | 0.0972348 |
| <b>B7L6J2</b> | TY-2482_chromosome | - | 855754 | 857679 | 22786.42604 | 25485.07623 | 27269.24143 | 33373.0832  | 26479.65972 | 31906.19777  | -0.289356043 | 0.302459603 | 0.2261993 |
| <b>B7L6J5</b> | TY-2482_chromosome | - | 860440 | 861195 | 117.568347  | 98.91655063 | 105.5594035 | 250.7129974 | 285.8145992 | 251.4183342  | -1.258816292 | 5.908605601 | 6.0689278 |
| <b>B7L6J6</b> | TY-2482_chromosome | + | 861482 | 862408 | 1065.743126 | 959.1527543 | 1039.893119 | 1245.034241 | 1127.45392  | 1479.668619  | -0.275510542 | 0.945234445 | 0.7564463 |
| <b>Q1RB71</b> | TY-2482_chromosome | - | 862443 | 862817 | 190.542095  | 223.0840384 | 200.6337169 | 311.2086513 | 309.3925076 | 330.1360723  | -0.659326793 | 2.795217265 | 2.3789097 |
| <b>B7L6J8</b> | TY-2482_chromosome | + | 862908 | 863765 | 815.8952904 | 740.4760648 | 863.1035964 | 1015.149372 | 1089.346888 | 1070.904953  | -0.343990843 | 1.386526225 | 1.1373106 |
| <b>B7L6J9</b> | TY-2482_chromosome | - | 863812 | 864345 | 609.2948638 | 740.3969004 | 642.2884569 | 247.1945859 | 354.1912782 | 251.6006335  | 1.17872089   | 7.783641531 | 6.9798151 |
| <b>B7L6K0</b> | TY-2482_chromosome | + | 864492 | 865157 | 309.0302621 | 280.9915573 | 259.2107051 | 241.2773557 | 298.5435716 | 295.8761812  | 0.052276509  | 0.040338004 | 0.0276192 |
| <b>D3GVE1</b> | TY-2482_chromosome | + | 865311 | 865910 | 139.2129929 | 126.6706972 | 124.643103  | 71.35028203 | 84.68459229 | 77.65365455  | 0.76115607   | 3.766294342 | 3.2430348 |
| <b>B7L6K2</b> | TY-2482_chromosome | + | 866046 | 867434 | 6244.555271 | 5521.019092 | 5996.922776 | 815.6470284 | 788.0768205 | 824.8657361  | 2.901076767  | 13.17651871 | 12.095812 |
| <b>D8E437</b> | TY-2482_chromosome | - | 867444 | 867668 | 220.4995575 | 266.075289  | 208.3394143 | 42.91809427 | 33.59929849 | 38.18579627  | 2.50778077   | 30.51447099 | 29.004344 |
| <b>POCE57</b> | TY-2482_chromosome | + | 867700 | 868680 | 268.4645008 | 267.974033  | 264.7017491 | 160.9853556 | 141.9039671 | 160.4356246  | 0.78564478   | 4.075704645 | 3.528964  |
| <b>B7L6K5</b> | TY-2482_chromosome | - | 869735 | 869995 | 39.53589885 | 43.53257825 | 42.25952853 | 18.11583387 | 34.87551522 | 9.903513793  | 0.935578815  | 2.816649901 | 2.3971041 |
| <b>B7L6K6</b> | TY-2482_chromosome | + | 870178 | 872436 | 548.9740526 | 540.7602135 | 497.6196879 | 1082.714474 | 922.6317815 | 1479.319139  | -1.095769111 | 7.125863137 | 6.3630437 |
| <b>B7L6K7</b> | TY-2482_chromosome | - | 872489 | 873244 | 121.9008701 | 106.9942863 | 130.9303902 | 197.3532193 | 162.8438449 | 163.3225665  | -0.522975397 | 2.120464246 | 1.7781367 |
| <b>B7L6K8</b> | TY-2482_chromosome | - | 873260 | 874609 | 76.91270451 | 91.48243012 | 76.41742901 | 165.18801   | 131.8862968 | 138.2824491  | -0.911944825 | 4.307688587 | 3.7437227 |
| <b>B7L6K9</b> | TY-2482_chromosome | - | 874717 | 875556 | 87.41214205 | 85.71466559 | 97.89391715 | 93.93685319 | 97.40714667 | 84.41217645  | -0.013720861 | 0.028722958 | 0.0191988 |

|               |                    |   |        |        |             |             |             |             |             |             |              |             |           |
|---------------|--------------------|---|--------|--------|-------------|-------------|-------------|-------------|-------------|-------------|--------------|-------------|-----------|
| <b>B7L6L0</b> | TY-2482_chromosome | - | 875567 | 875914 | 53.89856557 | 47.27919508 | 52.84587498 | 44.56420975 | 51.94196352 | 41.01495328 | 0.185424087  | 0.3012471   | 0.225327  |
| <b>B7L6L1</b> | TY-2482_chromosome | - | 875968 | 877323 | 57.32421424 | 78.17202425 | 65.97519366 | 85.12071196 | 115.7327062 | 79.30121837 | -0.545644869 | 1.451707187 | 1.1932448 |
| <b>B7L6L2</b> | TY-2482_chromosome | - | 877411 | 877728 | 90.05832037 | 132.3949542 | 126.3201104 | 147.0543531 | 211.4417538 | 85.16822185 | -0.452591936 | 0.750244378 | 0.5933259 |
| <b>Q1RB56</b> | TY-2482_chromosome | - | 877752 | 878009 | 120.3214596 | 147.318966  | 107.2408755 | 167.9189202 | 225.878249  | 143.9034208 | -0.62027143  | 1.773943807 | 1.4751916 |
| <b>B7L6L3</b> | TY-2482_chromosome | - | 878030 | 878365 | 3349.345957 | 4196.826879 | 3551.258051 | 2395.849401 | 3969.024371 | 2381.773944 | 0.288046091  | 0.448562572 | 0.3427952 |
| <b>B7L6L4</b> | TY-2482_chromosome | + | 878567 | 879391 | 883.100881  | 942.4817769 | 921.0172765 | 2194.9447   | 2050.334665 | 1936.774283 | -1.202512666 | 7.903314387 | 7.0909241 |
| <b>D8AB29</b> | TY-2482_chromosome | - | 879481 | 879702 | 94.25657165 | 115.6748413 | 68.69063967 | 79.2347089  | 111.2127259 | 67.58969095 | -0.024188837 | 0.15725802  | 0.1150176 |
| <b>B7L6L5</b> | TY-2482_chromosome | + | 879624 | 880508 | 364.0613149 | 418.8469101 | 374.2436817 | 240.8201759 | 253.8896964 | 274.8034517 | 0.570912196  | 2.416160264 | 2.0430465 |
| <b>D3GVF5</b> | TY-2482_chromosome | - | 880474 | 881109 | 92.61544242 | 121.0271857 | 82.10798925 | 49.71342737 | 52.76505501 | 59.02483223 | 0.791354863  | 3.711906696 | 3.1940108 |
| <b>B7L6L7</b> | TY-2482_chromosome | - | 881252 | 881734 | 175.0110178 | 167.8411421 | 172.3009948 | 124.985995  | 121.0669306 | 97.72442573 | 0.557710494  | 2.438287401 | 2.0617904 |
| <b>B7L6L8</b> | TY-2482_chromosome | - | 882067 | 883032 | 77.84825149 | 65.67824516 | 77.32916466 | 41.45147702 | 30.0205719  | 17.76102074 | 1.247374272  | 6.232320793 | 5.5257676 |
| <b>B7L6L9</b> | TY-2482_chromosome | - | 883028 | 884368 | 112.6932162 | 135.8022822 | 132.1355857 | 64.72983701 | 47.22869405 | 54.01989353 | 1.141448767  | 7.742395497 | 6.9427884 |
| <b>B7L6M0</b> | TY-2482_chromosome | - | 884368 | 885843 | 117.3292247 | 123.5476339 | 122.8119937 | 70.69879451 | 55.46489009 | 51.60586264 | 0.978381871  | 6.120239545 | 5.4213647 |
| <b>B7L6M1</b> | TY-2482_chromosome | - | 885843 | 886874 | 55.69325722 | 78.86401029 | 80.1714006  | 38.0222369  | 15.25371237 | 33.94856519 | 1.242287325  | 5.346361293 | 4.698163  |
| <b>B7L6M2</b> | TY-2482_chromosome | - | 886874 | 888091 | 73.295667   | 65.47326057 | 76.71401139 | 39.11913666 | 31.82948557 | 26.65314211 | 1.127945158  | 5.654573544 | 4.9855668 |
| <b>B7L6M3</b> | TY-2482_chromosome | + | 888537 | 889340 | 494.2929663 | 494.7249579 | 499.1270981 | 760.240327  | 869.1358804 | 838.0217401 | -0.71146174  | 3.607928075 | 3.101482  |
| <b>D3GVG3</b> | TY-2482_chromosome | + | 889462 | 890217 | 84.53564862 | 98.43623725 | 66.18761976 | 27.98216912 | 17.18099247 | 22.40827419 | 1.755990732  | 11.67642292 | 10.667385 |
| <b>B7L6M5</b> | TY-2482_chromosome | + | 890225 | 890899 | 142.8723576 | 143.9568617 | 130.5392105 | 27.17599217 | 16.24110075 | 27.40156691 | 2.533649026  | 25.98402757 | 24.565231 |
| <b>B7L6M6</b> | TY-2482_chromosome | + | 890916 | 891620 | 145.1246811 | 148.8335747 | 128.4929228 | 41.39878679 | 43.72079355 | 35.75937171 | 1.755449115  | 16.41935115 | 15.226873 |
| <b>B7L6M7</b> | TY-2482_chromosome | + | 891623 | 892168 | 119.6964243 | 116.0385773 | 112.1269101 | 58.89422512 | 68.29007155 | 64.47073208 | 0.870220463  | 4.65999127  | 4.0651036 |
| <b>B7L6M8</b> | TY-2482_chromosome | + | 892181 | 893344 | 272.9829991 | 290.1191587 | 240.6817521 | 150.6432062 | 128.2678614 | 130.3810564 | 0.907298238  | 5.581895238 | 4.9203727 |
| <b>B7L6M9</b> | TY-2482_chromosome | + | 893365 | 894852 | 149.7717286 | 124.629432  | 128.5999707 | 94.93708953 | 111.9695048 | 110.4322743 | 0.393201779  | 1.063104691 | 0.8572303 |
| <b>B7L6N0</b> | TY-2482_chromosome | + | 894855 | 895505 | 62.05324205 | 70.8082811  | 54.49456727 | 76.54291244 | 96.54211628 | 84.26467536 | -0.502738704 | 1.481036575 | 1.2189355 |
| <b>B7L6N1</b> | TY-2482_chromosome | + | 895575 | 896879 | 709.0463908 | 662.328271  | 647.5529635 | 119.1019312 | 112.8672792 | 92.45462799 | 2.604230478  | 3.214775397 | 3.608982  |
| <b>C8TSS4</b> | TY-2482_chromosome | - | 896894 | 897511 | 195.2838808 | 209.6594648 | 150.6814513 | 106.9570442 | 131.1783392 | 89.89505857 | 0.670479606  | 3.328825856 | 2.8513238 |
| <b>B7L6N3</b> | TY-2482_chromosome | + | 897598 | 898002 | 80.70591384 | 89.39148668 | 78.41801007 | 73.7512252  | 62.74216812 | 65.86073439 | 0.243146792  | 0.759946406 | 0.6020708 |
| <b>C8TSS6</b> | TY-2482_chromosome | - | 897974 | 898243 | 65.69030567 | 78.63174297 | 65.86797754 | 57.85624448 | 57.34402614 | 51.48772421 | 0.266324816  | 0.782621081 | 0.6208371 |
| <b>B7L6N4</b> | TY-2482_chromosome | + | 898479 | 898919 | 687.1616018 | 695.9438563 | 759.4270464 | 1130.431683 | 981.8898292 | 1031.511088 | -0.553910509 | 2.419931797 | 2.0456932 |
| <b>B7L6N5</b> | TY-2482_chromosome | - | 899942 | 900979 | 61.11597935 | 87.34839988 | 59.7558255  | 58.4494928  | 66.52053672 | 47.73615744 | 0.132639835  | 0.495629736 | 0.3807242 |
| <b>B7L6N6</b> | TY-2482_chromosome | - | 901110 | 903116 | 1604.8846   | 1568.845893 | 1547.513243 | 1961.116005 | 1518.730194 | 2103.331571 | -0.232834409 | 0.606517792 | 0.4724762 |
| <b>B7L6N7</b> | TY-2482_chromosome | - | 903124 | 904164 | 2084.109281 | 2256.077065 | 2204.527114 | 2380.712383 | 1792.630033 | 2716.256611 | -0.067854858 | 0.082036228 | 0.0599801 |
| <b>D3GVH9</b> | TY-2482_chromosome | - | 904284 | 904847 | 1146.50018  | 1077.149449 | 1087.996356 | 1242.524855 | 1054.634178 | 1395.52239  | -0.130515524 | 0.34659586  | 0.2613973 |
| <b>B7L6P1</b> | TY-2482_chromosome | + | 904993 | 906846 | 1481.354353 | 1586.498134 | 1577.328033 | 2344.448653 | 2271.448524 | 2498.231281 | -0.614046785 | 1.754519674 | 1.4595374 |
| <b>B7L6P2</b> | TY-2482_chromosome | + | 907016 | 908029 | 232.5458811 | 229.6057674 | 239.0392498 | 397.2376388 | 349.3517607 | 467.9631406 | -0.757833854 | 3.832552573 | 3.3041836 |
| <b>B7L6P3</b> | TY-2482_chromosome | + | 908043 | 908681 | 201.8396202 | 211.1388811 | 209.9584852 | 287.6043231 | 294.864487  | 284.2411849 | -0.483803129 | 1.807106361 | 1.5034038 |
| <b>B7L6P4</b> | TY-2482_chromosome | - | 908780 | 910135 | 30.09134161 | 28.01203132 | 21.42944537 | 28.94367502 | 29.13684906 | 25.17781149 | -0.115494795 | 0.070270839 | 0.0504117 |
| <b>B7L6P5</b> | TY-2482_chromosome | - | 910255 | 911010 | 75.53134921 | 88.3332819  | 62.30138719 | 119.9176433 | 127.5618947 | 61.40694675 | -0.609566308 | 1.133053809 | 0.917753  |
| <b>B7L6P6</b> | TY-2482_chromosome | - | 911150 | 912127 | 39.32206986 | 53.25725639 | 53.01594961 | 75.19538934 | 72.86593883 | 47.9346401  | -0.516294022 | 1.079735438 | 0.8717156 |
| <b>B7L6P7</b> | TY-2482_chromosome | - | 912140 | 913084 | 30.50183208 | 31.56364698 | 38.56051363 | 55.01352957 | 45.50688898 | 32.11064024 | -0.437652918 | 0.876970594 | 0.7000698 |
| <b>B7L6Q2</b> | TY-2482_chromosome | - | 917861 | 918130 | 402.0255477 | 526.4922732 | 476.0533189 | 105.2065832 | 135.8510272 | 54.89445723 | 2.125397803  | 17.63798093 | 16.417968 |
| <b>B7L6Q3</b> | TY-2482_chromosome | - | 918175 | 918585 | 735.5351278 | 946.768856  | 917.8735132 | 247.0246213 | 291.3844909 | 170.4151512 | 1.794164959  | 15.06880701 | 13.929289 |
| <b>B7L6Q4</b> | TY-2482_chromosome | + | 918927 | 919919 | 64080.26876 | 55491.61167 | 55939.56172 | 37082.98482 | 42149.03995 | 45693.68861 | 0.542923983  | 0.306246378 | 0.4723343 |
| <b>D3GVJ4</b> | TY-2482_chromosome | + | 919985 | 920887 | 1369.132575 | 1690.296393 | 1334.711135 | 994.6969327 | 831.6128232 | 1395.045561 | 0.431593261  | 1.317928967 | 1.0773816 |
| <b>B7L6Q6</b> | TY-2482_chromosome | - | 920944 | 921795 | 615.3731884 | 593.4929127 | 705.4112973 | 734.8629263 | 649.6855366 | 808.8384909 | -0.145122856 | 0.470536917 | 0.3600718 |
| <b>B7L6Q7</b> | TY-2482_chromosome | - | 921888 | 922631 | 2986.070059 | 2944.659708 | 3150.733585 | 3354.975167 | 3487.283653 | 3987.36311  | -0.211273401 | 0.320551471 | 0.2409894 |
| <b>B7L6Q8</b> | TY-2482_chromosome | + | 923067 | 924998 | 1990.617397 | 2081.483672 | 2215.229022 | 4320.85663  | 3244.19134  | 4279.488002 | -0.911264649 | 1.939108973 | 1.6186181 |
| <b>B7L6Q9</b> | TY-2482_chromosome | + | 925114 | 926394 | 476.3521385 | 466.6240053 | 485.9623495 | 969.6025795 | 739.7449401 | 931.3235744 | -0.885708226 | 4.846428496 | 4.2347471 |
| <b>B7L6R1</b> | TY-2482_chromosome | + | 928200 | 929687 | 101.8129444 | 83.85969597 | 99.10662375 | 114.2462371 | 124.7344403 | 102.872301  | -0.228860425 | 0.681619925 | 0.5349285 |
| <b>B7L6R2</b> | TY-2482_chromosome | + | 929733 | 930233 | 397.0050291 | 392.2734121 | 445.8686027 | 418.2215084 | 459.6195872 | 414.5443522 | -0.039790171 | 0.121676089 | 0.0892864 |
| <b>D8B8Y4</b> | TY-2482_chromosome | + | 930330 | 930515 | 29.24884423 | 15.73099133 | 33.42379231 | 35.38811728 | 31.78060463 | 41.83888998 | -0.301845533 | 0.927562241 | 0.7415576 |
| <b>B7L6R5</b> | TY-2482_chromosome | - | 930921 | 931739 | 150.4978166 | 129.5278335 | 129.2358586 | 76.82140398 | 81.02604543 | 71.21865914 | 0.842856588  | 4.475018397 | 3.8970201 |
| <b>B7L6R6</b> | TY-2482_chromosome | + | 931836 | 933014 | 99.30565578 | 110.5292956 | 111.6642141 | 172.9320184 | 134.5741539 | 169.5756602 | -0.584302218 | 2.337423342 | 1.9729846 |
| <b>B7L6R7</b> | TY-2482_chromosome | + | 933072 | 933416 | 305.7616118 | 312.0671227 | 337.5217522 | 212.5605781 | 267.6774048 | 204.2096363 | 0.491012434  | 1.757373998 | 1.4618283 |
| <b>B7L6R8</b> | TY-2482_chromosome | + | 933444 | 933695 | 275.7407621 | 306.5472909 | 329.6708422 | 148.6730546 | 245.1122938 | 124.3527897 | 0.8037886    | 3.266299448 | 2.7653197 |
| <b>B7L6R9</b> | TY-2482_chromosome | + | 933878 | 934900 | 1195.802526 | 1169.670787 | 1174.515747 | 1020.3337   | 1215.91154  | 1036.864456 | 0.120888187  | 0.23148283  | 0.1716928 |
| <b>B7L6S0</b> | TY-2482_chromosome | - | 935173 | 935418 | 1242.746012 | 1517.910129 | 1231.755837 | 694.8840475 | 1276.274097 | 625.6509521 | 0.54977226   | 1.90602998  | 1.5902899 |
| <b>B7L6S1</b> | TY-2482_chromosome | - | 935433 | 935615 | 640.4052486 | 675.0264476 | 393.2967992 | 203.2184273 | 580.3313342 | 195.6914086 | 0.708391503  | 1.965192525 | 1.6409034 |



|               |                    |   |        |        |              |             |             |             |             |             |               |             |           |
|---------------|--------------------|---|--------|--------|--------------|-------------|-------------|-------------|-------------|-------------|---------------|-------------|-----------|
| <b>B7L6S2</b> | TY-2482_chromosome | - | 935648 | 936853 | 1304.413949  | 1416.815515 | 864.113714  | 382.6444834 | 895.9847996 | 391.5086314 | 1.012444177   | 4.291782704 | 3.7300414 |
| <b>A7ZMR8</b> | TY-2482_chromosome | + | 936876 | 937820 | 121.3257222  | 103.8164293 | 104.8240723 | 76.10817247 | 102.1323753 | 53.29716928 | 0.491089463   | 1.584479383 | 1.31074   |
| <b>B7L6S6</b> | TY-2482_chromosome | - | 938035 | 938670 | 261.6585557  | 290.2447912 | 259.3337523 | 186.7747847 | 268.6437416 | 191.0723819 | 0.301254204   | 0.910530254 | 0.7274364 |
| <b>B7L6S7</b> | TY-2482_chromosome | - | 938800 | 939720 | 124.2799695  | 113.6008744 | 106.7477342 | 176.1125122 | 183.892818  | 142.4751111 | -0.573735418  | 2.120501307 | 1.7781367 |
| <b>B7L6S8</b> | TY-2482_chromosome | + | 940905 | 940905 | 114.2832739  | 130.6378615 | 120.7777013 | 96.71127377 | 82.7567683  | 89.49410134 | 0.400230043   | 1.504528754 | 1.2389338 |
| <b>B7L6T0</b> | TY-2482_chromosome | + | 942801 | 943922 | 77.8904275   | 70.03182576 | 69.18774026 | 40.90223263 | 25.31372763 | 45.64309738 | 0.977129644   | 4.0482242   | 3.5048217 |
| <b>B7L6T1</b> | TY-2482_chromosome | + | 943981 | 944943 | 73.437134    | 62.62535701 | 64.58623686 | 54.20427993 | 39.95662152 | 44.82614729 | 0.520454659   | 1.660397443 | 1.3772637 |
| <b>B7L6T2</b> | TY-2482_chromosome | - | 945003 | 946127 | 190.6621901  | 227.0953487 | 161.3022695 | 368.7989756 | 388.554265  | 457.5098984 | -1.120616149  | 6.1076614   | 5.409262  |
| <b>B7L6T3</b> | TY-2482_chromosome | - | 946200 | 947882 | 399.4517696  | 353.8081672 | 376.9653233 | 947.565194  | 1029.310402 | 926.3343119 | -1.338258744  | 10.99912852 | 10.026419 |
| <b>B7L6T4</b> | TY-2482_chromosome | - | 948090 | 948668 | 275.0272188  | 298.8760859 | 319.0703911 | 822.0306732 | 971.1085881 | 817.1858348 | -1.542268542  | 12.50730379 | 11.457553 |
| <b>B7L6T5</b> | TY-2482_chromosome | - | 948711 | 949403 | 275.297614   | 225.8843635 | 280.1176707 | 529.7354656 | 537.7875722 | 649.5712592 | -1.0404050066 | 7.026499253 | 6.271328  |
| <b>B7L6T6</b> | TY-2482_chromosome | - | 949464 | 951371 | 438.8211065  | 504.0319712 | 468.0668086 | 718.9072815 | 753.5026365 | 826.0190604 | -0.71200306   | 3.268810525 | 2.7971926 |
| <b>A7ZMT0</b> | TY-2482_chromosome | - | 951407 | 951790 | 505.2570489  | 652.6270493 | 575.6889384 | 549.3845022 | 742.7738596 | 923.9922634 | -0.124992069  | 6.12188457  | 0.0892898 |
| <b>B7L6T8</b> | TY-2482_chromosome | + | 952210 | 952566 | 232.2306299  | 322.551427  | 278.6070048 | 48.10500463 | 56.57908111 | 27.02497536 | 2.530146171   | 26.54571242 | 25.119363 |
| <b>B7L6U0</b> | TY-2482_chromosome | + | 952942 | 954300 | 186.7499624  | 232.9019894 | 200.6095479 | 356.9104456 | 410.4407729 | 440.5044989 | -0.98206486   | 5.311160667 | 4.6654947 |
| <b>B7L6U1</b> | TY-2482_chromosome | + | 954307 | 954882 | 170.5547181  | 152.9621156 | 170.4022455 | 109.3047424 | 125.5785651 | 143.0913674 | 0.458103555   | 1.291627665 | 1.0530626 |
| <b>B7L6U2</b> | TY-2482_chromosome | + | 955069 | 956430 | 1377.688643  | 1114.486298 | 1310.636361 | 2477.09813  | 2380.64651  | 2682.378898 | -0.922745082  | 3.738858459 | 3.2184468 |
| <b>B7L6U3</b> | TY-2482_chromosome | + | 956564 | 958159 | 111.7740258  | 69.76279663 | 97.11350257 | 64.83945151 | 80.18051908 | 62.07614416 | 0.521794599   | 1.268537724 | 1.0339104 |
| <b>B7L6U4</b> | TY-2482_chromosome | - | 958169 | 959722 | 682.7439479  | 634.772936  | 740.9881227 | 633.5298397 | 578.6778491 | 816.4477345 | 0.099516735   | 0.037474215 | 0.0254137 |
| <b>C8UBR5</b> | TY-2482_chromosome | - | 959713 | 959919 | 82.68037882  | 102.7965613 | 113.2339753 | 62.53365732 | 79.17379273 | 94.28514197 | 0.397935395   | 0.902487507 | 0.0892738 |
| <b>D7X960</b> | TY-2482_chromosome | - | 960023 | 960214 | 2205.349706  | 2246.030797 | 2183.991652 | 2749.503055 | 2014.730837 | 2368.144029 | -0.140199448  | 0.118044724 | 0.0868836 |
| <b>B7L6U5</b> | TY-2482_chromosome | + | 960185 | 961153 | 12766.43394  | 11496.81409 | 12441.48745 | 23263.85188 | 14096.49688 | 19828.86192 | -0.646845335  | 0.91166636  | 0.7281371 |
| <b>B7L6U6</b> | TY-2482_chromosome | + | 961219 | 962016 | 9531.985538  | 8797.296217 | 9616.388595 | 17572.67142 | 10259.70157 | 15305.71018 | -0.631045321  | 0.905555537 | 0.7231864 |
| <b>B7L6U7</b> | TY-2482_chromosome | + | 962023 | 962880 | 9555.196498  | 8684.000584 | 9434.135054 | 14873.96353 | 10064.99691 | 13794.05757 | -0.476268286  | 0.646054608 | 0.5048408 |
| <b>B7L6U8</b> | TY-2482_chromosome | + | 962938 | 963393 | 308.7845501  | 326.849624  | 314.8878804 | 671.5567555 | 483.0959813 | 615.6180613 | -0.928864737  | 4.77146522  | 4.1655822 |
| <b>B7L6U9</b> | TY-2482_chromosome | + | 963583 | 963825 | 150.3771505  | 144.3837749 | 138.5130825 | 82.72164439 | 165.0539057 | 88.64717004 | 0.378025683   | 0.90174988  | 0.7203932 |
| <b>B7L6V0</b> | TY-2482_chromosome | + | 963825 | 964388 | 94.1805298   | 106.9784991 | 86.89718046 | 136.5621557 | 160.2834373 | 113.5701171 | -0.585585637  | 1.855391121 | 1.5464873 |
| <b>B7L6V1</b> | TY-2482_chromosome | - | 964391 | 965197 | 232.7429889  | 187.0907943 | 219.2431125 | 457.6164318 | 528.8239672 | 431.7748081 | -1.105472388  | 7.451633928 | 6.6713842 |
| <b>A1ABZ1</b> | TY-2482_chromosome | + | 965690 | 965936 | 3377.03449   | 3819.595592 | 3884.287324 | 3541.462819 | 5450.638197 | 2533.454372 | -0.101685488  | 0.054019097 | 0.0382319 |
| <b>Q1RAW4</b> | TY-2482_chromosome | - | 966346 | 966651 | 360.9863577  | 459.2040715 | 379.4673209 | 303.7005862 | 465.3035067 | 265.0430027 | 0.135876719   | 0.443671374 | 0.338936  |
| <b>B7L6V6</b> | TY-2482_chromosome | + | 967062 | 967298 | 80.41914789  | 64.63870892 | 50.96880785 | 56.66214133 | 110.5036854 | 41.60792659 | -0.124761899  | 0.114261962 | 0.0836117 |
| <b>C8UBS7</b> | TY-2482_chromosome | - | 967447 | 968235 | 618.9917076  | 793.8427426 | 638.2313703 | 1192.692407 | 1266.863261 | 993.6778553 | -0.851663314  | 3.761687271 | 3.2387451 |
| <b>B7L7N0</b> | TY-2482_chromosome | + | 968412 | 969782 | 32.35999509  | 26.33061685 | 24.85673463 | 61.35413557 | 50.91868961 | 50.17318195 | -0.975474831  | 3.714267005 | 3.1957435 |
| <b>B7L7N1</b> | TY-2482_chromosome | - | 969834 | 970712 | 2598.071349  | 2283.396987 | 2573.672374 | 2268.142053 | 2584.600325 | 2341.884886 | 0.094226103   | 0.053927512 | 0.0382319 |
| <b>B7L7N2</b> | TY-2482_chromosome | - | 970907 | 972952 | 3254.788195  | 2905.940817 | 2746.329915 | 9436.556812 | 8258.634871 | 9769.595389 | -1.617355595  | 4.510005501 | 3.9283991 |
| <b>B7L7N3</b> | TY-2482_chromosome | - | 972975 | 973670 | 4087.927489  | 3401.165364 | 3491.818474 | 6807.518651 | 6682.468246 | 7439.643743 | -0.890530482  | 1.860788272 | 1.5509144 |
| <b>B7L7N4</b> | TY-2482_chromosome | - | 973770 | 974318 | 1160.628658  | 1156.696402 | 1158.683832 | 1724.488124 | 1874.754278 | 1653.90433  | -0.600242178  | 2.463250168 | 2.0833433 |
| <b>B7L7N5</b> | TY-2482_chromosome | + | 974394 | 975674 | 772.5698776  | 802.7851393 | 667.8260104 | 348.7567448 | 561.7043961 | 419.8464878 | 0.744718765   | 3.181447846 | 2.7202092 |
| <b>B7L7N6</b> | TY-2482_chromosome | + | 975646 | 978276 | 1345.27902   | 1472.633496 | 1338.168959 | 1487.459475 | 1391.412709 | 1577.27832  | -0.121332673  | 0.206679663 | 0.1526391 |
| <b>B7L7N7</b> | TY-2482_chromosome | + | 978359 | 979795 | 205.1616967  | 197.3625537 | 142.0186259 | 273.7420483 | 238.3141957 | 335.0098626 | -0.658125654  | 2.427169289 | 2.0520287 |
| <b>B7L7N8</b> | TY-2482_chromosome | + | 979916 | 980149 | 72.41706593  | 88.63643219 | 71.09751271 | 78.84465327 | 139.4763133 | 92.36550254 | -0.457254583  | 1.164789943 | 0.9467198 |
| <b>B7L7N9</b> | TY-2482_chromosome | + | 980173 | 980445 | 99.29690346  | 133.8106854 | 92.71646515 | 39.68399317 | 65.75416325 | 35.99414847 | 1.091717284   | 5.645226569 | 4.9775499 |
| <b>B7L7P0</b> | TY-2482_chromosome | - | 980452 | 981105 | 109.8504058  | 122.8283022 | 108.804536  | 59.81125686 | 67.288596   | 43.91918197 | 0.908856411   | 0.905870296 | 4.4663141 |
| <b>ryeA</b>   | TY-2482_chromosome | + | 981202 | 981450 | 609.2086956  | 771.3822274 | 705.1463162 | 332.8147518 | 798.7048714 | 258.9422598 | 0.527123605   | 1.321807505 | 1.0807632 |
| <b>B7L7P2</b> | TY-2482_chromosome | - | 981504 | 981842 | 756.7317207  | 767.9081257 | 810.8615461 | 965.8008552 | 1197.738356 | 963.2592325 | -0.409718907  | 1.509966017 | 1.2434931 |
| <b>B7L7P3</b> | TY-2482_chromosome | - | 981858 | 982727 | 1716.241876  | 1697.907365 | 1799.876964 | 2249.237752 | 2270.573381 | 2272.08347  | -0.367268822  | 0.838026002 | 0.6662429 |
| <b>B7L7P4</b> | TY-2482_chromosome | - | 982734 | 983105 | 1115.77258   | 1097.540437 | 1106.524924 | 1118.979502 | 1120.253044 | 1178.722875 | -0.030408413  | 0.07683168  | 0.0557756 |
| <b>B7L7P5</b> | TY-2482_chromosome | + | 983244 | 983471 | 145.2055131  | 146.0201719 | 115.8008931 | 80.55982927 | 110.2898255 | 70.17858964 | 0.585079833   | 2.442949813 | 2.0661181 |
| <b>B7L7P6</b> | TY-2482_chromosome | + | 983576 | 984229 | 204.3890386  | 178.1410926 | 164.1031663 | 161.7859606 | 202.9847902 | 205.0576856 | -0.021275628  | 0.10360691  | 0.0763134 |
| <b>B7L7P7</b> | TY-2482_chromosome | + | 984256 | 984915 | 253.5072259  | 245.1843743 | 257.5225778 | 293.5072259 | 287.5512869 | 302.5469546 | -0.207371875  | 0.59436746  | 0.4620069 |
| <b>B7L7P8</b> | TY-2482_chromosome | - | 984918 | 986975 | 505.3212114  | 594.2659183 | 573.8007813 | 731.7020935 | 637.8725549 | 727.4514619 | -0.353274179  | 0.962719964 | 0.7711304 |
| <b>B7L7P9</b> | TY-2482_chromosome | - | 987187 | 987843 | 319.1083498  | 348.0437606 | 391.1443856 | 267.6970831 | 304.8973315 | 298.596917  | 0.312232822   | 0.772503204 | 0.6118815 |
| <b>D6JAC7</b> | TY-2482_chromosome | + | 988050 | 988253 | 664.894045   | 606.1330835 | 646.3732793 | 485.6163039 | 692.7480645 | 470.0763689 | 0.240388074   | 0.506551029 | 0.3894082 |
| <b>B7L7Q0</b> | TY-2482_chromosome | - | 988173 | 988538 | 1623.5225056 | 1579.561124 | 1700.195141 | 1358.406278 | 1495.482245 | 1442.099645 | 0.121909805   | 0.186072482 | 0.1372806 |
| <b>B7L7Q1</b> | TY-2482_chromosome | - | 988596 | 988883 | 1177.877574  | 1115.862025 | 1156.719445 | 814.5293589 | 1246.091554 | 823.9783113 | 0.278221243   | 0.626073417 | 0.4882581 |
| <b>B7L7Q2</b> | TY-2482_chromosome | + | 989017 | 990192 | 118.0671283  | 140.1192897 | 111.3149521 | 315.2382987 | 348.6339689 | 268.7565405 | -1.419617008  | 9.42012325  | 8.5234562 |
| <b>B7L7Q3</b> | TY-2482_chromosome | - | 990254 | 990892 | 1479.282217  | 1383.767063 | 1422.104275 | 2081.256842 | 1841.876009 | 2077.276222 | -0.474727032  | 1.78017781  | 1.4802882 |

|        |                    |   |         |         |             |             |             |             |              |             |              |             |           |
|--------|--------------------|---|---------|---------|-------------|-------------|-------------|-------------|--------------|-------------|--------------|-------------|-----------|
| B7L7Q4 | TY-2482_chromosome | - | 990932  | 992740  | 718.7123988 | 657.747088  | 720.3760356 | 727.0643985 | 633.3129067  | 751.0600752 | 0.020416045  | 0.015120126 | 0.0098455 |
| B7L7Q5 | TY-2482_chromosome | - | 992978  | 994450  | 2982.268892 | 3180.966475 | 3177.74309  | 6036.663394 | 5163.529166  | 6505.455954 | -0.919380599 | 1.878707799 | 1.5666922 |
| B7L7Q6 | TY-2482_chromosome | + | 994788  | 995654  | 646.1526302 | 694.3250341 | 563.4960395 | 640.2749291 | 678.9364769  | 604.0471923 | -0.071281663 | 0.026388947 | 0.0176422 |
| B7L7Q7 | TY-2482_chromosome | + | 995785  | 997224  | 2130.68983  | 1970.977053 | 1966.068917 | 3227.079696 | 2768.252049  | 3825.359723 | -0.659027447 | 1.294830923 | 1.0559361 |
| B7L7Q8 | TY-2482_chromosome | - | 997361  | 998329  | 624.4757352 | 600.5028461 | 604.7219658 | 908.43055   | 845.4268916  | 793.5172707 | -0.493312181 | 1.793469523 | 1.4914869 |
| B7L7Q9 | TY-2482_chromosome | - | 998452  | 999771  | 616.2082192 | 595.5294318 | 627.9239822 | 2118.035374 | 1895.577351  | 2089.148755 | -1.719595491 | 15.85061676 | 14.676177 |
| B7L7R0 | TY-2482_chromosome | - | 999790  | 1000719 | 684.2264565 | 703.1225276 | 689.9069444 | 1163.059131 | 1176.705275  | 1118.379611 | -0.74787641  | 3.939951877 | 3.4044579 |
| B7L7R1 | TY-2482_chromosome | + | 1000798 | 1001550 | 588.6753733 | 485.9137118 | 577.1539224 | 431.2419291 | 472.3240255  | 486.6692966 | 0.319877676  | 0.658005492 | 0.5146661 |
| B7L7R2 | TY-2482_chromosome | + | 1001550 | 1002332 | 377.7493642 | 338.2976393 | 359.8070198 | 455.7669479 | 479.6374516  | 418.5821204 | -0.320204625 | 0.984967378 | 0.7898131 |
| B7L7R3 | TY-2482_chromosome | - | 1002485 | 1003492 | 954.9287631 | 999.1882424 | 965.8733216 | 1445.45396  | 1392.350266  | 1456.364446 | -0.567413409 | 2.252674546 | 1.8956598 |
| B7L7R4 | TY-2482_chromosome | - | 1003504 | 1004112 | 653.4346636 | 748.8588521 | 713.7214649 | 965.4338529 | 912.7508132  | 945.9404822 | -0.445340831 | 1.515705922 | 1.2487054 |
| B3Y0L8 | TY-2482_chromosome | + | 1004288 | 1004986 | 74.24951549 | 69.15204859 | 54.3736812  | 55.59766445 | 86.75279006  | 38.8750131  | 0.061646427  | 0.167885444 | 0.1303237 |
| B7L7R6 | TY-2482_chromosome | - | 1004994 | 1005512 | 1341.531811 | 1470.098267 | 1348.75195  | 1829.073843 | 1729.988164  | 1714.339885 | -0.380452191 | 1.060974102 | 0.8552525 |
| B7L7R7 | TY-2482_chromosome | - | 1005550 | 1006287 | 2470.734654 | 2596.546452 | 2718.299596 | 4397.598757 | 3683.797374  | 4324.32593  | -0.673448672 | 1.20860627  | 0.9811067 |
| B7L7R8 | TY-2482_chromosome | - | 1006319 | 1006759 | 939.9239319 | 938.3001712 | 1061.875793 | 1706.333466 | 1365.866956  | 1744.29266  | -0.686774139 | 3.157984256 | 2.6983295 |
| B7L7R9 | TY-2482_chromosome | - | 1006764 | 1008533 | 3385.37389  | 3451.914766 | 3665.075015 | 8941.572448 | 6822.522198  | 8801.281249 | -1.222140885 | 2.822059908 | 2.6020138 |
| B7L7S0 | TY-2482_chromosome | + | 1008843 | 1009406 | 111.4602838 | 115.3294164 | 99.45589086 | 125.2633808 | 142.9266089  | 129.0181994 | -0.308530227 | 0.811625996 | 0.6458778 |
| C6V226 | TY-2482_chromosome | + | 1009764 | 1010009 | 48.5468263  | 57.84684441 | 44.6392253  | 9.918639721 | 21.0319492   | 19.52460435 | 1.58768975   | 7.02165805  | 6.267028  |
| B7LEU8 | TY-2482_chromosome | - | 1010554 | 1011246 | 39.9783052  | 62.66839115 | 56.94259877 | 28.28823658 | 15.27295499  | 38.76171195 | 0.934239441  | 2.871008389 | 2.4451665 |
| B7LEU7 | TY-2482_chromosome | - | 1011171 | 1012706 | 52.00105702 | 82.24807191 | 61.94230713 | 18.03185762 | 13.48160733  | 37.11318326 | 1.510530094  | 6.146092222 | 5.4433952 |
| B7L8N6 | TY-2482_chromosome | - | 1013528 | 1016920 | 105.3125685 | 127.3311471 | 104.7861673 | 80.89579432 | 68.17860018  | 80.16981736 | 0.495709439  | 2.11642639  | 1.7745173 |
| Q1RCC4 | TY-2482_chromosome | + | 1018292 | 1019095 | 24.54879099 | 32.11264458 | 24.93908097 | 34.78867256 | 20.73129809  | 49.22311762 | -0.377884495 | 0.563166562 | 0.435938  |
| C8UEI9 | TY-2482_chromosome | - | 1019325 | 1021934 | 149.3667166 | 179.3364539 | 165.7125043 | 73.00173944 | 48.96170895  | 86.30380128 | 1.234194113  | 7.857352207 | 7.0040398 |
| A1AAL5 | TY-2482_chromosome | + | 1022113 | 1023447 | 121.7928166 | 131.1539413 | 129.4216165 | 126.7229261 | 112.7649084  | 140.5282198 | 0.013271845  | 0.06827873  | 0.040251  |
| D3H3E3 | TY-2482_chromosome | - | 1023946 | 1024518 | 31.42839024 | 28.90024877 | 31.032222   | 28.56633161 | 28.1205407   | 45.42879403 | -0.075603176 | 0.202214255 | 0.1493575 |
| B7L470 | TY-2482_chromosome | - | 1025317 | 1026342 | 96.29517111 | 101.0140191 | 117.13721   | 161.5144779 | 132.7352878  | 192.9402626 | -0.581629349 | 2.555830332 | 2.1657641 |
| D3H3D9 | TY-2482_chromosome | - | 1026403 | 1026747 | 25.39517196 | 21.77869879 | 28.57824472 | 42.85989733 | 28.05757733  | 47.00832719 | -0.571924641 | 1.501752442 | 1.2367007 |
| B7L468 | TY-2482_chromosome | - | 1026787 | 1028289 | 57.43187108 | 59.76577138 | 68.89599681 | 80.97002623 | 49.84892359  | 92.86906119 | -0.225605985 | 0.515327405 | 0.3964364 |
| C8TUI5 | TY-2482_chromosome | - | 1028282 | 1029871 | 150.4328476 | 134.5844785 | 136.5627589 | 82.20924953 | 99.16135438  | 129.6548399 | 0.523170479  | 1.431110465 | 1.1764275 |
| B7L465 | TY-2482_chromosome | - | 1030061 | 1032028 | 70.71499615 | 96.59292771 | 90.57476156 | 61.70752336 | 63.71715553  | 59.3079923  | 0.430721744  | 1.503932992 | 1.2385134 |
| A1AAK5 | TY-2482_chromosome | - | 1031961 | 1032746 | 32.59335182 | 43.30023411 | 45.82058108 | 11.30972899 | 21.95181957  | 18.34281038 | 1.272882174  | 4.307068623 | 3.7435894 |
| B7LES3 | TY-2482_chromosome | + | 1035327 | 1035638 | 97.28878352 | 85.93920151 | 94.42931741 | 83.10974461 | 121.2400249  | 74.14634406 | 0.015314941  | 0           | 0         |
| B7LES2 | TY-2482_chromosome | - | 1035654 | 1036457 | 68.09479888 | 66.93568458 | 62.57921744 | 47.31938892 | 56.5510805   | 33.4208551  | 0.476106556  | 1.530080176 | 1.260786  |
| B7MPX6 | TY-2482_chromosome | - | 1036831 | 1038711 | 164.4124139 | 158.2298378 | 193.0945942 | 104.244633  | 95.45772613  | 132.4219157 | 0.711965757  | 2.738527886 | 2.33009   |
| B7MV04 | TY-2482_chromosome | - | 1038847 | 1039137 | 3194.616307 | 3341.406818 | 1010.611862 | 181.3314678 | 194.3067076  | 153.8863188 | 2.680738295  | 10.34590107 | 9.4025588 |
| C6USM2 | TY-2482_chromosome | - | 1039467 | 1040522 | 60.29400887 | 87.75366032 | 67.19069157 | 48.31538202 | 64.72260815  | 50.176861   | 0.313811173  | 0.933685266 | 0.7472065 |
| B7NVG6 | TY-2482_chromosome | - | 1040677 | 1040910 | 74.89531279 | 65.19819479 | 68.59578473 | 29.52130082 | 67.67206978  | 33.34398072 | 0.720016971  | 1.889715028 | 1.5761351 |
| B3HVA3 | TY-2482_chromosome | + | 1041142 | 1042065 | 109.0854847 | 129.8570727 | 104.0713219 | 229.4596464 | 202.2973113  | 6.649095227 | -0.628644815 | 0.285663566 | 0.213334  |
| B3IDN1 | TY-2482_chromosome | + | 1042055 | 1042600 | 142.094075  | 141.6886615 | 137.243343  | 65.61564213 | 121.600202   | 9.185354133 | 0.983458991  | 2.183270809 | 1.8346185 |
| B3WIT4 | TY-2482_chromosome | - | 1047848 | 1049038 | 607.2313144 | 488.5225001 | 266.951024  | 114.2627044 | 274.5477959  | 64.38148865 | 1.486251747  | 5.1084236   | 4.4772424 |
| C8UKW2 | TY-2482_chromosome | + | 1049943 | 1050632 | 766.5512266 | 775.0702269 | 719.4973295 | 383.3597627 | 487.9441343  | 337.2406953 | 0.873738527  | 4.595547084 | 4.0069779 |
| Q1R2C0 | TY-2482_chromosome | - | 1050735 | 1051064 | 591.9141681 | 590.1884266 | 325.8524408 | 87.6593176  | 285.6068314  | 57.83177992 | 1.687677699  | 5.848112934 | 5.1637393 |
| P76513 | TY-2482_chromosome | + | 1051766 | 1052587 | 86.74854026 | 96.63694086 | 75.60779715 | 70.25996079 | 72.82479272  | 65.92466044 | 0.244197251  | 0.764828804 | 0.6059941 |
| B3WUG8 | TY-2482_chromosome | + | 1055098 | 1055853 | 48.39973919 | 58.66987    | 57.53576206 | 35.10478576 | 27.24614753  | 27.78765363 | 0.810969208  | 3.159339316 | 2.6990859 |
| B6M1E3 | TY-2482_chromosome | + | 1056342 | 1056575 | 32.86872861 | 29.37978594 | 36.48478573 | 31.06309374 | 33.77132342  | 17.67786894 | 0.24257937   | 0.399392922 | 0.3031282 |
| B7MPT9 | TY-2482_chromosome | + | 1056622 | 1057941 | 64.9276377  | 681.5695056 | 552.9110432 | 367.6447926 | 463.3792723  | 308.357956  | 0.659438903  | 3.105937494 | 2.6526077 |
| E1RYP9 | TY-2482_chromosome | + | 1057926 | 1059141 | 459.2339286 | 440.6468665 | 427.0453895 | 310.5140913 | 346.79808076 | 307.9912311 | 0.457980999  | 1.643811433 | 1.3628637 |
| B7L7S3 | TY-2482_chromosome | + | 1059185 | 1059925 | 219.8246044 | 219.2281612 | 226.4899173 | 405.821539  | 367.5819757  | 447.0699126 | -0.853717474 | 4.7164646   | 4.115545  |
| B7L7S4 | TY-2482_chromosome | + | 1059925 | 1060893 | 315.2343285 | 188.9605966 | 283.4215492 | 450.2827694 | 447.6809404  | 556.1298856 | -0.734261807 | 4.028348048 | 3.4862737 |
| B7L7S5 | TY-2482_chromosome | - | 1061065 | 1063491 | 226.4622202 | 259.2532464 | 234.2937317 | 230.0011201 | 213.8456277  | 205.3916119 | 0.096314393  | 0.331012479 | 0.2488138 |
| B7L7S7 | TY-2482_chromosome | - | 1065007 | 1065750 | 838.4539822 | 806.0100457 | 712.0981299 | 1037.55348  | 1165.852435  | 956.7232465 | -0.452011285 | 1.535339042 | 1.265691  |
| B7L7S8 | TY-2482_chromosome | - | 1065767 | 1066330 | 227.2772745 | 227.0881156 | 242.3988743 | 545.1049162 | 527.8111604  | 534.1738077 | -1.19661014  | 8.473842663 | 7.620677  |
| B7L7S9 | TY-2482_chromosome | + | 1066546 | 1068276 | 1092.654472 | 1007.845652 | 1057.019585 | 1774.363459 | 1692.632897  | 2006.062583 | -0.75611918  | 3.941023204 | 3.4048756 |
| B7L7T1 | TY-2482_chromosome | - | 1069067 | 1069456 | 24.5650679  | 26.01220585 | 28.51203363 | 60.40308736 | 83.84224374  | 67.21809464 | -1.386000433 | 7.400901363 | 6.6246491 |
| B7L7T2 | TY-2482_chromosome | - | 1069459 | 1071534 | 137.8194886 | 118.9993117 | 111.9797368 | 383.2897057 | 414.9783276  | 443.1984391 | -1.721121873 | 16.15248584 | 14.973147 |
| B7L7T3 | TY-2482_chromosome | - | 1071530 | 1072675 | 40.55620954 | 29.84065523 | 36.30089489 | 108.1527433 | 132.045886   | 108.0693223 | -1.644100213 | 12.64209916 | 11.589135 |
| B7L7T4 | TY-2482_chromosome | - | 1072880 | 1073521 | 331.4306048 | 277.0162021 | 314.9651126 | 494.305324  | 412.086349   | 676.78188   | -0.682961159 | 3.24308223  | 2.774908  |

|               |                    |   |         |         |             |             |             |              |             |             |              |             |           |
|---------------|--------------------|---|---------|---------|-------------|-------------|-------------|--------------|-------------|-------------|--------------|-------------|-----------|
| <b>B7L7T5</b> | TY-2482_chromosome | - | 1073535 | 1073921 | 212.2400122 | 236.5369379 | 230.4461383 | 347.9576558  | 253.6913112 | 472.7661211 | -0.627330211 | 2.340568707 | 1.9754688 |
| <b>B7L7T6</b> | TY-2482_chromosome | - | 1073939 | 1074985 | 195.6518206 | 255.9637066 | 225.1141134 | 349.2946545  | 281.0466507 | 438.8122441 | -0.679155504 | 2.525153722 | 2.1378819 |
| <b>B7L7T7</b> | TY-2482_chromosome | - | 1074991 | 1075848 | 210.8684419 | 213.7654208 | 208.5744936 | 387.5190679  | 309.2792549 | 435.0818466 | -0.826895323 | 4.074645785 | 3.5282401 |
| <b>B7L7T8</b> | TY-2482_chromosome | - | 1075870 | 1077468 | 483.0497815 | 537.215855  | 453.3370366 | 956.7826774  | 841.6908838 | 1110.003733 | -1.003108827 | 5.665818596 | 4.9954858 |
| <b>B7L7T9</b> | TY-2482_chromosome | - | 1077517 | 1079175 | 694.6580041 | 738.9588558 | 714.33981   | 1253.5178003 | 1087.445065 | 1194.567508 | -0.741801267 | 3.756680803 | 3.2350057 |
| <b>B7L7U0</b> | TY-2482_chromosome | - | 1079323 | 1079823 | 331.288665  | 339.7072293 | 315.4512738 | 475.7622215  | 584.3102417 | 557.7547462 | -0.704410263 | 3.279681835 | 2.8072925 |
| <b>B7L7U1</b> | TY-2482_chromosome | - | 1079847 | 1081808 | 740.3251146 | 777.4498324 | 718.8649139 | 1580.529906  | 1594.361833 | 1877.089994 | -1.168445511 | 7.945198673 | 7.1290858 |
| <b>B7L7U2</b> | TY-2482_chromosome | - | 1081816 | 1082739 | 278.8438222 | 301.0155126 | 290.480565  | 327.5922536  | 335.7972845 | 349.8853138 | -0.224343206 | 0.561520678 | 0.434802  |
| <b>B7L7U3</b> | TY-2482_chromosome | - | 1082739 | 1083623 | 483.1185453 | 449.0390488 | 492.6128039 | 348.5689453  | 408.6986684 | 335.7117395 | 0.40422044   | 1.203008169 | 0.9763112 |
| <b>B7L7U4</b> | TY-2482_chromosome | - | 1083753 | 1084328 | 177.1651439 | 190.18485   | 178.8507266 | 232.2445234  | 243.8655159 | 277.3474591 | -0.455413028 | 1.655590222 | 1.373004  |
| <b>B7L7U5</b> | TY-2482_chromosome | - | 1084334 | 1084690 | 124.7151879 | 129.4383149 | 151.4866169 | 201.9957363  | 233.9154891 | 230.1642884 | -0.668467967 | 3.404257046 | 2.9201332 |
| <b>B7L7U6</b> | TY-2482_chromosome | + | 1085460 | 1085885 | 340.9097391 | 363.0364993 | 361.8341232 | 342.8243881  | 402.3823145 | 267.6176656 | 0.034255786  | 0.133067463 | 0.0972348 |
| <b>B7L7U7</b> | TY-2482_chromosome | - | 1085898 | 1087319 | 847.9959341 | 847.7797178 | 886.7549673 | 1840.948846  | 1656.249388 | 1720.879709 | -1.017976536 | 6.094885215 | 5.3969607 |
| <b>A1AC54</b> | TY-2482_chromosome | - | 1087297 | 1088151 | 561.7233126 | 513.2004934 | 522.8241529 | 602.8593835  | 566.0016289 | 631.3807195 | -0.151870268 | 0.397282985 | 0.3014184 |
| <b>B7L7U9</b> | TY-2482_chromosome | - | 1088264 | 1089250 | 82.29793962 | 75.41734978 | 81.22387032 | 73.86434623  | 57.25418055 | 63.23082054 | 0.293938787  | 0.785181812 | 0.6231806 |
| <b>B7L7V0</b> | TY-2482_chromosome | - | 1089265 | 1090776 | 98.86035499 | 64.86587582 | 105.3616762 | 95.08310307  | 70.9115393  | 68.70892788 | 0.26267231   | 0.419103894 | 0.3193058 |
| <b>B7L7V1</b> | TY-2482_chromosome | - | 1090849 | 1091835 | 36.46441398 | 41.23642225 | 44.40645996 | 77.38640115  | 50.84281627 | 59.34220887 | -0.661087448 | 1.923002108 | 1.6039416 |
| <b>B7L7V2</b> | TY-2482_chromosome | + | 1092632 | 1093132 | 363.5642376 | 332.7514791 | 328.660692  | 345.210599   | 438.7780765 | 329.2206061 | -0.11493389  | 0.24465772  | 0.1814692 |
| <b>C3T592</b> | TY-2482_chromosome | + | 1093217 | 1093486 | 166.1769861 | 144.9787318 | 146.4341644 | 71.70533291  | 106.5901891 | 93.35994866 | 0.807805997  | 3.48843506  | 2.9952234 |
| <b>B7L7V6</b> | TY-2482_chromosome | + | 1094424 | 1094918 | 1034.786335 | 1288.855602 | 1106.432847 | 3341.795397  | 4935.489511 | 2692.460676 | -1.75646244  | 5.185944177 | 4.5494392 |
| <b>B7L7V7</b> | TY-2482_chromosome | - | 1094962 | 1095198 | 136.6324296 | 175.9769185 | 146.4408636 | 78.67610997  | 176.0348506 | 86.08666475 | 0.384182144  | 1.01761698  | 0.8175935 |
| <b>B7L7V8</b> | TY-2482_chromosome | + | 1095388 | 1096596 | 137.5633572 | 136.8249363 | 141.9828202 | 203.2311782  | 249.4072351 | 239.3703457 | -0.699001634 | 3.55924902  | 3.0585674 |
| <b>B7L7V9</b> | TY-2482_chromosome | - | 1096664 | 1097326 | 814.8984536 | 939.884354  | 979.9823103 | 984.3850421  | 984.6637036 | 1002.492156 | -0.124087942 | 0.274251932 | 0.2050791 |
| <b>leuZ</b>   | TY-2482_chromosome | - | 1097522 | 1097608 | 497.4512338 | 503.8286241 | 389.7286324 | 303.9826677  | 669.3396227 | 256.1663046 | 0.121544984  | 0.281251698 | 0.2099536 |
| <b>cysT</b>   | TY-2482_chromosome | - | 1097621 | 1097694 | 831.7343533 | 777.9852839 | 716.7694903 | 532.5665108  | 1124.410491 | 439.0462796 | 0.132673078  | 0.242661765 | 0.1799132 |
| <b>glyY</b>   | TY-2482_chromosome | - | 1097749 | 1097824 | 874.9801774 | 896.0036824 | 819.1758363 | 608.0998991  | 1313.74407  | 457.5794703 | 0.083843392  | 0.185503004 | 0.1368175 |
| <b>B7L807</b> | TY-2482_chromosome | - | 1097979 | 1098524 | 1110.515826 | 1092.519811 | 1134.312584 | 972.9946897  | 1222.311194 | 990.8640113 | 0.08133787   | 0.126440799 | 0.0928189 |
| <b>B7L8S5</b> | TY-2482_chromosome | - | 1098584 | 1100413 | 3159.585535 | 3306.9219   | 3069.302652 | 2766.758436  | 2477.98315  | 3051.964312 | 0.195870713  | 0.24201204  | 0.1796661 |
| <b>B7L8S6</b> | TY-2482_chromosome | - | 1100413 | 1101066 | 2137.888888 | 2397.70014  | 2397.395567 | 1314.221282  | 1407.938806 | 1041.125653 | 0.835933839  | 4.552085766 | 3.9670935 |
| <b>B7L8S8</b> | TY-2482_chromosome | + | 1101525 | 1101746 | 408.4627694 | 353.8804503 | 374.9516856 | 122.273465   | 236.1186794 | 95.58459251 | 1.333349059  | 6.464875262 | 5.7435487 |
| <b>B7L8S9</b> | TY-2482_chromosome | - | 1101820 | 1102539 | 567.5033309 | 590.0214815 | 616.0932856 | 350.5588294  | 476.1917801 | 263.8305016 | 0.673483712  | 2.757055852 | 2.3459122 |
| <b>B7L8T0</b> | TY-2482_chromosome | - | 1102772 | 1103521 | 476.5350529 | 423.0459125 | 417.7612856 | 513.0182775  | 442.2061596 | 511.676351  | -0.145913816 | 0.35259367  | 0.2665839 |
| <b>B7L8T1</b> | TY-2482_chromosome | - | 1103521 | 1104186 | 448.0662317 | 377.5499389 | 439.1440635 | 530.0413875  | 435.7948851 | 575.9379709 | -0.228307817 | 0.770946943 | 0.6108759 |
| <b>B7L8T2</b> | TY-2482_chromosome | - | 1104204 | 1105187 | 855.6205265 | 821.6771689 | 762.3630528 | 888.0535456  | 655.9812397 | 961.3231434 | -0.037297655 | 0.06891592  | 0.049455  |
| <b>B7L8T3</b> | TY-2482_chromosome | - | 1105295 | 1106092 | 2899.38323  | 2892.601006 | 2778.819828 | 1135.704376  | 980.9799508 | 1023.634715 | 1.422727113  | 7.407201169 | 6.6303801 |
| <b>D3GXH3</b> | TY-2482_chromosome | - | 1106183 | 1106767 | 110.6405868 | 108.6340821 | 115.6035226 | 177.2667041  | 178.3615729 | 180.243089  | -0.662185488 | 3.241233192 | 2.7736179 |
| <b>B7L8T5</b> | TY-2482_chromosome | - | 1106780 | 1107496 | 329.7784688 | 319.9024808 | 338.087083  | 271.7708514  | 269.3391946 | 299.8040614 | 0.261013582  | 0.607431775 | 0.4732606 |
| <b>B7L8T6</b> | TY-2482_chromosome | - | 1107663 | 1107950 | 2128.380676 | 2035.311224 | 2073.100645 | 2934.731376  | 2961.268219 | 3370.377913 | -0.540299587 | 0.983263935 | 0.7884952 |
| <b>B7L8T6</b> | TY-2482_chromosome | - | 1107926 | 1108675 | 4982.807974 | 4976.75916  | 5139.302466 | 8469.616861  | 8121.224141 | 10141.71264 | -0.788604848 | 1.493723269 | 1.230228  |
| <b>B7L8T7</b> | TY-2482_chromosome | + | 1108923 | 1110335 | 786.6856532 | 798.5587775 | 796.8856876 | 1520.326121  | 1367.731203 | 1620.647654 | -0.913291902 | 5.060592052 | 4.4330587 |
| <b>B7L8T8</b> | TY-2482_chromosome | + | 1110354 | 1110761 | 180.9417937 | 175.7222946 | 189.5698233 | 432.5272525  | 439.4991638 | 537.7202385 | -1.315322089 | 10.16833887 | 9.2332691 |
| <b>B7L8T9</b> | TY-2482_chromosome | + | 1110764 | 1111126 | 122.6905561 | 118.6295306 | 114.7672356 | 226.9464057  | 237.4804126 | 285.1422464 | -1.039346    | 6.749012389 | 6.0082213 |
| <b>B7L8U0</b> | TY-2482_chromosome | + | 1111207 | 1112691 | 955.4298707 | 1227.283166 | 1134.99424  | 1934.681932  | 1902.896604 | 1973.397198 | -0.850265543 | 4.053514191 | 3.5094461 |
| <b>B7L8U1</b> | TY-2482_chromosome | - | 1112731 | 1113141 | 780.0366996 | 759.9712788 | 735.3853687 | 530.1930067  | 744.5729453 | 585.6224084 | 0.305317654  | 0.793557188 | 0.6303105 |
| <b>B7L8U2</b> | TY-2482_chromosome | + | 1113328 | 1114530 | 1821.053936 | 1559.956797 | 1871.941898 | 83.41441993  | 72.72357125 | 90.57095921 | 4.472294792  | 80.12320301 | 77.639949 |
| <b>B7L8U3</b> | TY-2482_chromosome | + | 1114530 | 1114760 | 471.8521588 | 426.4514001 | 524.5038966 | 21.04897085  | 25.58857215 | 13.61728022 | 4.562217055  | 66.85518895 | 64.658241 |
| <b>E6BEB6</b> | TY-2482_chromosome | + | 1114872 | 1115366 | 85.6120555  | 60.81313057 | 65.13824678 | 103.3162421  | 21.34389614 | 1.482246244 | 1.82246244   | 7.856618198 | 7.0479188 |
| <b>B7L8U6</b> | TY-2482_chromosome | - | 1116287 | 1117081 | 20.62603117 | 32.08253894 | 28.49549278 | 33.48130493  | 35.52080829 | 30.43090175 | -0.365201977 | 0.529886835 | 0.4088822 |
| <b>B7L8U7</b> | TY-2482_chromosome | - | 1117094 | 1117642 | 55.24923503 | 59.13105032 | 58.77979105 | 66.97148826  | 50.01994028 | 38.67774362 | 0.069403982  | 0.253770304 | 0.1887067 |
| <b>B7L8U8</b> | TY-2482_chromosome | - | 1117814 | 1118323 | 114.2202289 | 154.5418442 | 111.9247752 | 52.74007562  | 94.02810512 | 46.6320407  | 0.871133316  | 4.041970945 | 3.4992331 |
| <b>E9UHF9</b> | TY-2482_chromosome | + | 1118243 | 1118557 | 63.4031775  | 78.5466051  | 66.57142366 | 40.69239002  | 81.24772041 | 51.55339452 | 0.245540745  | 0.495170903 | 0.3805133 |
| <b>B7L8U9</b> | TY-2482_chromosome | - | 1118490 | 1118801 | 42.22973607 | 78.24384161 | 48.56652838 | 60.031055    | 91.18834949 | 60.84067986 | -0.483752696 | 0.654575021 | 0.511983  |
| <b>B7L8V0</b> | TY-2482_chromosome | + | 1119016 | 1120671 | 161.6032051 | 142.707636  | 158.4963596 | 466.5223811  | 516.8710656 | 633.6703553 | -1.722798175 | 16.0703545  | 14.892451 |
| <b>B7L8V1</b> | TY-2482_chromosome | + | 1120667 | 1121659 | 162.4758384 | 135.0102335 | 141.8330213 | 369.261306   | 432.2552759 | 516.5833893 | -1.501752902 | 12.14061968 | 11.109663 |
| <b>B7L8V2</b> | TY-2482_chromosome | + | 1121655 | 1122338 | 73.65480435 | 104.2738184 | 99.88386776 | 226.8519825  | 231.9791538 | 320.4104702 | -1.475435517 | 10.39347838 | 9.4467824 |
| <b>B7L8V3</b> | TY-2482_chromosome | + | 1122341 | 1123711 | 104.9484424 | 92.76245659 | 78.1733766  | 310.0754364  | 407.745263  | 431.2085959 | -2.019365399 | 19.09968517 | 17.840013 |
| <b>B7L8V4</b> | TY-2482_chromosome | + | 1123733 | 1124173 | 23.36709777 | 12.54304181 | 21.91566204 | 90.75606498  | 108.2594995 | 141.4981085 | -2.362341742 | 19.41985857 | 18.149679 |

|               |                    |   |         |         |             |             |             |             |             |             |              |             |           |
|---------------|--------------------|---|---------|---------|-------------|-------------|-------------|-------------|-------------|-------------|--------------|-------------|-----------|
| <b>B7L8V5</b> | TY-2482_chromosome | + | 1124173 | 1125297 | 66.61971061 | 55.47696782 | 67.4600792  | 258.8116846 | 278.3620706 | 442.4096424 | -2.22864103  | 20.49115721 | 19.189746 |
| <b>B7L8V6</b> | TY-2482_chromosome | + | 1125405 | 1125866 | 66.48973949 | 71.74780993 | 67.27985645 | 253.582944  | 333.1127262 | 361.4354535 | -2.167864853 | 21.26301226 | 19.95002  |
| <b>B7L8V7</b> | TY-2482_chromosome | + | 1125874 | 1126875 | 124.8750615 | 119.1137263 | 128.8106545 | 588.6916444 | 632.4314524 | 802.0273027 | -2.369755704 | 26.18246435 | 24.761165 |
| <b>B7L8V8</b> | TY-2482_chromosome | + | 1126875 | 1127285 | 64.45972253 | 61.5164719  | 51.17318316 | 308.5059724 | 327.6219423 | 332.7969683 | -2.462972409 | 27.41076137 | 25.971524 |
| <b>B7L8V9</b> | TY-2482_chromosome | + | 1127291 | 1127653 | 38.35640874 | 29.36486061 | 30.86842169 | 146.137093  | 177.5144529 | 167.0554236 | -2.257649185 | 24.29087827 | 22.89635  |
| <b>B7L8W0</b> | TY-2482_chromosome | + | 1127656 | 1128390 | 34.47707716 | 33.37847499 | 29.51195246 | 129.6224213 | 171.1759673 | 153.9137148 | -2.209597051 | 21.44936741 | 20.128478 |
| <b>B7L8W1</b> | TY-2482_chromosome | + | 1128403 | 1128669 | 11.28481834 | 13.98440781 | 6.880746561 | 51.04641892 | 60.11694677 | 52.72226414 | -2.452854472 | 12.94897803 | 11.878099 |
| <b>B7L8W2</b> | TY-2482_chromosome | + | 1128681 | 1129463 | 18.09987042 | 11.72456722 | 15.83676484 | 53.41566686 | 48.22590622 | 42.35961568 | -1.608325282 | 7.775404322 | 6.9727876 |
| <b>B7L8W3</b> | TY-2482_chromosome | + | 1129756 | 1130376 | 17.85980832 | 20.31668251 | 19.13400182 | 94.91619255 | 97.48662358 | 54.67353484 | -2.19285346  | 12.38995905 | 11.344455 |
| <b>A1ACA1</b> | TY-2482_chromosome | + | 1130502 | 1130774 | 129.0581732 | 195.0157282 | 137.0333349 | 61.17369491 | 104.873929  | 69.99346466 | 0.866866017  | 4.299727398 | 3.7372918 |
| <b>Q1RAI7</b> | TY-2482_chromosome | - | 1130757 | 1131104 | 565.2137051 | 615.4682988 | 627.3144349 | 260.9379646 | 391.5305321 | 266.1128258 | 0.978669819  | 5.220503329 | 4.580274  |
| <b>dsrA</b>   | TY-2482_chromosome | - | 1131061 | 1131147 | 100.912088  | 100.7601681 | 105.0183248 | 28.94933461 | 30.06478175 | 23.92837303 | 1.868429903  | 14.9321816  | 13.797881 |
| <b>Q8Z5R0</b> | TY-2482_chromosome | - | 1132026 | 1133852 | 645.3355607 | 697.2905    | 620.4450586 | 386.4432662 | 460.5157587 | 470.8233276 | 0.575018007  | 2.288854966 | 1.9292345 |
| <b>B7L8X1</b> | TY-2482_chromosome | - | 1134287 | 1135201 | 350.3869747 | 457.3478179 | 444.5008059 | 368.9158299 | 312.9108957 | 480.8826207 | 0.1151372    | 0.198133091 | 0.1462425 |
| <b>B7L8X2</b> | TY-2482_chromosome | + | 1135374 | 1136291 | 61.3543978  | 72.61022633 | 47.03669021 | 129.9521192 | 108.1652729 | 160.0144295 | -1.199568588 | 6.263286898 | 5.5552788 |
| <b>B7L8X3</b> | TY-2482_chromosome | - | 1136286 | 1136753 | 119.5335091 | 131.0435658 | 128.1004518 | 168.5496584 | 179.2620719 | 198.4545189 | -0.517030612 | 2.132030991 | 1.7880258 |
| <b>B7L8X4</b> | TY-2482_chromosome | - | 1136737 | 1138152 | 474.166665  | 431.1491875 | 478.7486806 | 973.9015086 | 940.9612703 | 1001.127803 | -1.041221835 | 7.089090888 | 6.3301124 |
| <b>D3GXL0</b> | TY-2482_chromosome | - | 1138222 | 1138950 | 376.2265476 | 343.3686159 | 365.1075848 | 305.7562491 | 361.3414176 | 339.4240615 | 0.14665083   | 0.230077445 | 0.1706149 |
| <b>B7L8X6</b> | TY-2482_chromosome | - | 1138957 | 1139319 | 183.4000315 | 141.0387249 | 174.3951284 | 41.33912811 | 68.34585933 | 68.1063413  | 1.619981788  | 10.60856599 | 9.6499241 |
| <b>B7MWF2</b> | TY-2482_chromosome | + | 1139815 | 1140941 | 105.3179803 | 113.2977966 | 116.2838266 | 40.7856635  | 68.40242516 | 55.25976144 | 1.064654336  | 5.323858078 | 4.6773497 |
| <b>E9XVB1</b> | TY-2482_chromosome | + | 1140996 | 1141343 | 118.9579755 | 111.2363091 | 113.5059463 | 92.86913897 | 91.97798946 | 63.67737549 | 0.428379217  | 1.620162561 | 1.3424734 |
| <b>D3GUS1</b> | TY-2482_chromosome | - | 1141269 | 1142417 | 300.7607251 | 261.1623989 | 279.2364397 | 218.4956024 | 181.0729077 | 158.2656618 | 0.569890153  | 2.380411257 | 2.0099852 |
| <b>B7LDT8</b> | TY-2482_chromosome | + | 1142491 | 1143372 | 124.7823099 | 119.5843251 | 146.2065901 | 107.515741  | 91.00244582 | 71.52520831 | 0.514583763  | 1.945164454 | 1.6234777 |
| <b>E1U309</b> | TY-2482_chromosome | - | 1143884 | 1144578 | 187.6817085 | 207.5004193 | 170.7235792 | 78.03459543 | 85.57531766 | 79.01494516 | 1.175225662  | 8.815685344 | 7.9459204 |
| <b>B7L8Y4</b> | TY-2482_chromosome | + | 1144664 | 1145512 | 202.5369802 | 228.5193223 | 211.2141757 | 237.3150424 | 187.3661557 | 226.2038394 | -0.058298905 | 0.036058526 | 0.0242914 |
| <b>B7L8Y5</b> | TY-2482_chromosome | - | 1145616 | 1146971 | 407.5282685 | 422.2427925 | 406.6392968 | 233.4337427 | 268.6716358 | 124.6277959 | 0.89410929   | 4.287880035 | 3.7264855 |
| <b>D3GXL6</b> | TY-2482_chromosome | - | 1146974 | 1147690 | 320.1811796 | 296.5806631 | 289.0345514 | 87.95535838 | 105.6894398 | 71.49132838 | 1.751050427  | 15.59928306 | 14.438248 |
| <b>B7L8Y7</b> | TY-2482_chromosome | + | 1147775 | 1148185 | 45.92497423 | 38.65059411 | 29.91407994 | 28.36043382 | 41.23491668 | 7.493419163 | 0.452233171  | 0.954022354 | 0.7643515 |
| <b>B7L8Y8</b> | TY-2482_chromosome | + | 1148297 | 1149298 | 78.60024821 | 63.46097555 | 80.04120169 | 60.28612966 | 57.26997839 | 72.07586157 | 0.312916911  | 0.538299755 | 0.4156388 |
| <b>B7L8Y9</b> | TY-2482_chromosome | + | 1149302 | 1149934 | 28.8487357  | 52.74404574 | 30.69881094 | 31.90889803 | 23.60709056 | 22.6079909  | 0.308034923  | 0.999453586 | 0.8017565 |
| <b>B7L8Z0</b> | TY-2482_chromosome | + | 1150194 | 1150841 | 124.792298  | 136.0948484 | 129.3677813 | 151.1176274 | 155.8373716 | 45.97900749 | 0.000608284  | 0.201406487 | 0.1486572 |
| <b>serU</b>   | TY-2482_chromosome | - | 1151514 | 1151603 | 75.33877397 | 109.8867323 | 68.20116062 | 119.8075417 | 117.5317385 | 73.08177851 | -0.536258636 | 0.82840966  | 0.6591535 |
| <b>D3GYI6</b> | TY-2482_chromosome | + | 1151658 | 1152491 | 441.2265706 | 435.4794316 | 433.0626847 | 1349.233698 | 1167.561739 | 1111.937471 | -1.501509519 | 12.92140032 | 11.854231 |
| <b>asnV</b>   | TY-2482_chromosome | + | 1152595 | 1152670 | 186.474682  | 181.6829397 | 124.802376  | 157.3601497 | 182.9602655 | 174.9559412 | -0.108783069 | 0.11808758  | 0.0868836 |
| <b>B7L8Z2</b> | TY-2482_chromosome | + | 1152832 | 1154091 | 923.6024042 | 957.5643721 | 837.5924907 | 974.3520825 | 997.3727399 | 1169.28518  | -0.208719478 | 0.54211617  | 0.4184335 |
| <b>B7L8Z3</b> | TY-2482_chromosome | - | 1154291 | 1155592 | 59.87741394 | 48.04419242 | 62.91588793 | 63.53655741 | 76.52330526 | 62.02973224 | -0.178500002 | 0.490253182 | 0.3764621 |
| <b>B7L8Z4</b> | TY-2482_chromosome | - | 1155623 | 1157023 | 26.12401462 | 26.07762575 | 27.77682675 | 28.05086563 | 30.01490898 | 34.03766325 | -0.167317503 | 0.299086726 | 0.2238461 |
| <b>B7L8Z8</b> | TY-2482_chromosome | + | 1161783 | 1167905 | 96.73499654 | 71.26011834 | 82.45440679 | 60.67237323 | 67.2953654  | 88.95595735 | 0.319318312  | 0.479742672 | 0.3673097 |
| <b>B7L8Z9</b> | TY-2482_chromosome | + | 1167996 | 1177484 | 160.8174754 | 181.1114431 | 130.2584259 | 102.8253469 | 122.9250091 | 106.6790138 | 0.437293348  | 1.79866573  | 1.4957284 |
| <b>B7L903</b> | TY-2482_chromosome | + | 1181096 | 1183114 | 61.77319771 | 90.37775558 | 70.52271999 | 53.95078281 | 52.79483261 | 46.26113166 | 0.430145394  | 1.541233979 | 1.2710544 |
| <b>F1ZIR7</b> | TY-2482_chromosome | + | 1184444 | 1186950 | 179.5199015 | 163.1796701 | 179.6379104 | 106.4550828 | 116.5715047 | 84.62288073 | 0.761106197  | 3.862070206 | 3.3320922 |
| <b>B7L909</b> | TY-2482_chromosome | + | 1188103 | 1189416 | 388.6453209 | 452.848065  | 455.6910429 | 426.8498494 | 414.0450728 | 436.7428683 | 0.009585654  | 0.035570564 | 0.0241669 |
| <b>B7L910</b> | TY-2482_chromosome | + | 1189521 | 1190972 | 990.9987163 | 917.3628961 | 893.8045594 | 1334.922024 | 1130.124707 | 1791.150269 | -0.549738205 | 2.243171674 | 1.8876698 |
| <b>B7L911</b> | TY-2482_chromosome | + | 1191318 | 1192031 | 991.298923  | 1304.418886 | 1199.707303 | 2056.215569 | 2317.296276 | 657.9203514 | -0.696785475 | 1.090750245 | 0.8814102 |
| <b>B7L912</b> | TY-2482_chromosome | - | 1192665 | 1194302 | 141.1558535 | 164.2008032 | 157.8333351 | 87.09097162 | 68.19388898 | 67.32835748 | 0.992297473  | 6.525462188 | 5.8001097 |
| <b>B7L913</b> | TY-2482_chromosome | - | 1194426 | 1195373 | 163.1262206 | 157.0313177 | 142.8314885 | 49.33545308 | 49.1611994  | 42.32052677 | 1.680514558  | 16.34804242 | 15.158519 |
| <b>B7L914</b> | TY-2482_chromosome | - | 1195478 | 1196392 | 51.59511257 | 45.02141938 | 55.63323426 | 42.12853469 | 73.91749306 | 50.20755014 | -0.05237684  | 0.179111682 | 0.1322372 |
| <b>B7L915</b> | TY-2482_chromosome | - | 1196853 | 1197782 | 958.7147179 | 910.0349603 | 998.3772659 | 472.1267371 | 496.0007574 | 463.200046  | 1.023154345  | 6.272172157 | 5.5631914 |
| <b>B7L916</b> | TY-2482_chromosome | - | 1197850 | 1198926 | 381.8398824 | 488.1751247 | 459.6052834 | 497.9837675 | 407.6053396 | 486.674017  | -0.112196454 | 0.127613034 | 0.0934769 |
| <b>B7L917</b> | TY-2482_chromosome | - | 1198941 | 1199681 | 247.1282456 | 333.7928084 | 336.9866675 | 318.8314408 | 233.7476856 | 301.1505534 | 0.061704272  | 0.19028628  | 0.1404283 |
| <b>B7L918</b> | TY-2482_chromosome | - | 1199681 | 1200223 | 205.2585839 | 294.2463566 | 261.5203242 | 178.0550265 | 165.5987097 | 169.7614865 | 0.495046474  | 2.121599934 | 1.778644  |
| <b>B7L922</b> | TY-2482_chromosome | + | 1202286 | 1203497 | 30.36794984 | 50.96080045 | 33.43557184 | 119.0172821 | 97.41832263 | 53.49939624 | -1.469253672 | 4.593158331 | 4.0053265 |
| <b>B7L923</b> | TY-2482_chromosome | + | 1203514 | 1204269 | 41.92517866 | 32.61112974 | 44.4340756  | 100.5446043 | 81.0124715  | 50.73614847 | -0.984293189 | 3.459138891 | 2.9682907 |
| <b>C2DPG0</b> | TY-2482_chromosome | + | 1204329 | 1205291 | 23.90642966 | 33.7925537  | 24.43530972 | 25.47484672 | 28.2247436  | 27.62201697 | -0.160196766 | 0.226351228 | 0.1673249 |
| <b>B7L926</b> | TY-2482_chromosome | + | 1205297 | 1206328 | 77.0657593  | 70.28568264 | 75.94209101 | 36.08512148 | 34.55034295 | 38.08529164 | 1.066044276  | 5.302291721 | 4.6570464 |
| <b>D3GYL6</b> | TY-2482_chromosome | - | 1206374 | 1206699 | 25.28690388 | 24.23039834 | 32.66859221 | 27.99792346 | 24.45592098 | 42.78892417 | -0.100959139 | 0.271410017 | 0.2030057 |
| <b>B7L930</b> | TY-2482_chromosome | - | 1206986 | 1208362 | 161.6083414 | 176.1376153 | 126.9369085 | 128.9055366 | 156.5291908 | 179.8583316 | -0.020396245 | 0           | 0         |

|               |                    |   |         |         |             |             |             |             |             |             |              |             |           |
|---------------|--------------------|---|---------|---------|-------------|-------------|-------------|-------------|-------------|-------------|--------------|-------------|-----------|
| <b>E9TFH8</b> | TY-2482_chromosome | - | 1210432 | 1210748 | 42.08566434 | 40.48643818 | 28.58408981 | 20.2576604  | 43.84666104 | 36.68258699 | 0.164446232  | 0.199555592 | 0.1472358 |
| <b>C8TTS1</b> | TY-2482_chromosome | + | 1211947 | 1212700 | 46.70933001 | 36.52991582 | 30.6121707  | 21.60251438 | 29.26283196 | 14.94545297 | 0.75433481   | 2.105729925 | 1.764865  |
| <b>B7L938</b> | TY-2482_chromosome | - | 1213665 | 1215197 | 367.0691963 | 411.3747314 | 378.2348331 | 196.5984068 | 150.0367675 | 191.9319606 | 1.066127116  | 7.096465469 | 6.336393  |
| <b>Q0TGA2</b> | TY-2482_chromosome | - | 1216568 | 1216960 | 108.1251301 | 159.4217846 | 118.629523  | 205.4678818 | 135.6594528 | 25.12208982 | -0.236075148 | 0.079230763 | 0.0575749 |
| <b>B7L940</b> | TY-2482_chromosome | + | 1217530 | 1218690 | 410.4744803 | 440.1056064 | 422.5108717 | 633.6543809 | 496.0504968 | 215.6785417 | -0.235345862 | 0.111973735 | 0.0820132 |
| <b>C8TV65</b> | TY-2482_chromosome | + | 1218660 | 1219645 | 27.13817671 | 21.25902528 | 20.23388221 | 27.59268308 | 28.22512432 | 25.13674431 | -0.232323303 | 0.335366119 | 0.2521314 |
| <b>B7L943</b> | TY-2482_chromosome | + | 1219866 | 1222259 | 56.72649782 | 68.2680338  | 55.94218622 | 87.42134274 | 76.37903066 | 88.06166099 | -0.532858443 | 1.574688648 | 1.3025489 |
| <b>B7L944</b> | TY-2482_chromosome | + | 1222259 | 1223161 | 49.43401597 | 46.53458969 | 44.0870524  | 54.56070214 | 47.25490676 | 56.45331063 | -0.175341055 | 0.319823168 | 0.2403754 |
| <b>B7L945</b> | TY-2482_chromosome | + | 1223161 | 1224228 | 31.08761178 | 47.21021958 | 40.32083323 | 24.74050837 | 29.14310087 | 28.88847577 | 0.467787088  | 1.180931702 | 0.9591781 |
| <b>B7L946</b> | TY-2482_chromosome | + | 1224259 | 1225047 | 79.27105972 | 97.86936564 | 60.84599994 | 35.16815548 | 51.10884148 | 34.49529844 | 0.867851149  | 3.76013822  | 3.23783   |
| <b>B7L947</b> | TY-2482_chromosome | + | 1225066 | 1225473 | 53.04503758 | 58.57407313 | 51.35822241 | 40.62305631 | 58.46812729 | 25.69318178 | 0.307588085  | 0.771372519 | 0.6109197 |
| <b>D8EDM2</b> | TY-2482_chromosome | - | 1225476 | 1225709 | 27.08471896 | 25.43113754 | 19.46743704 | 23.38957282 | 38.43819797 | 17.63360948 | -0.197552767 | 0.176439446 | 0.1300111 |
| <b>Q5K5L6</b> | TY-2482_chromosome | - | 1226588 | 1227559 | 38.39373273 | 22.90375637 | 33.72249906 | 27.68355204 | 23.61289502 | 26.31410411 | 0.382673253  | 0.538849958 | 0.4159365 |
| <b>E9TQB2</b> | TY-2482_chromosome | + | 1228180 | 1228756 | 50.81960305 | 66.70880959 | 39.07447018 | 18.71193679 | 32.0356946  | 17.46441089 | 1.068557047  | 4.169789343 | 3.6159539 |
| <b>D7YLU2</b> | TY-2482_chromosome | + | 1228759 | 1229073 | 30.66884373 | 30.85757224 | 28.9508577  | 16.72555707 | 28.36763209 | 17.36171506 | 0.530731057  | 1.105934626 | 0.8939021 |
| <b>Q1RA65</b> | TY-2482_chromosome | - | 1229391 | 1229744 | 65.09892966 | 64.33040717 | 59.93861384 | 36.21929751 | 57.44166347 | 51.20633587 | 0.422683312  | 0.971956571 | 0.7790337 |
| <b>B7L9N3</b> | TY-2482_chromosome | - | 1229851 | 1230243 | 2677.87407  | 2997.56027  | 2813.215626 | 1640.024314 | 2749.602051 | 1432.094578 | 0.508594724  | 0.864177886 | 0.6888472 |
| <b>C8U552</b> | TY-2482_chromosome | - | 1230352 | 1230882 | 38.59352155 | 44.37734195 | 56.57424961 | 37.95875381 | 44.65153827 | 36.99836589 | 0.251255009  | 0.432420218 | 0.3299799 |
| <b>B7LF78</b> | TY-2482_chromosome | - | 1230965 | 1231942 | 493.3127687 | 584.1952566 | 594.3785415 | 589.5453391 | 531.3507621 | 755.927968  | -0.14126358  | 0.357307805 | 0.2700027 |
| <b>B3WJP5</b> | TY-2482_chromosome | - | 1232009 | 1232686 | 243.1430079 | 222.0928251 | 225.0495753 | 145.7185394 | 162.9171621 | 162.9171621 | 0.661839457  | 2.805373265 | 2.3883205 |
| <b>D8B6I8</b> | TY-2482_chromosome | - | 1232887 | 1233384 | 352.7643835 | 436.4186347 | 380.2014124 | 60.40648072 | 51.78388385 | 68.14838165 | 2.659425029  | 32.0578218  | 30.525581 |
| <b>B7L9N6</b> | TY-2482_chromosome | - | 1233479 | 1234642 | 49.41854919 | 35.70248888 | 53.77289713 | 106.5759385 | 76.29258603 | 112.8250278 | -0.990296041 | 5.212097137 | 4.5726982 |
| <b>B7L9N7</b> | TY-2482_chromosome | + | 1234851 | 1236275 | 1176.460738 | 1051.766314 | 1101.220036 | 1148.52726  | 1051.934531 | 1313.988675 | -0.03572938  | 0.148813202 | 0.1082476 |
| <b>B7L9N8</b> | TY-2482_chromosome | - | 1236324 | 1236548 | 914.4606848 | 1098.211682 | 902.97026   | 98.76097809 | 76.34050581 | 92.04409484 | 3.372075387  | 49.46779476 | 47.571877 |
| <b>B7L9N9</b> | TY-2482_chromosome | - | 1236565 | 1237620 | 2099.945644 | 2073.619559 | 2027.496727 | 99.89082802 | 92.79373524 | 96.07171663 | 4.413996026  | 74.86685207 | 72.569234 |
| <b>B7L9P0</b> | TY-2482_chromosome | - | 1237802 | 1239157 | 1399.450167 | 1139.816687 | 1210.088489 | 2322.886455 | 2098.514658 | 2374.578227 | -0.821605288 | 4.481334903 | 3.9022549 |
| <b>B7L9P1</b> | TY-2482_chromosome | - | 1239427 | 1240353 | 383.7096974 | 361.0004884 | 359.7343831 | 201.8213404 | 158.23642   | 198.5168579 | 0.984063421  | 5.976579674 | 5.2852498 |
| <b>B7L9P2</b> | TY-2482_chromosome | - | 1240402 | 1241223 | 1593.124636 | 1332.759614 | 1370.493066 | 899.594422  | 868.1320717 | 1018.047479 | 0.670042371  | 2.620701559 | 2.2333321 |
| <b>B7L9P3</b> | TY-2482_chromosome | - | 1241309 | 1241560 | 239.2194688 | 269.4616886 | 234.8753585 | 195.5212583 | 200.1796204 | 226.0777586 | 0.240364409  | 0.690789369 | 0.5418547 |
| <b>A1ACN0</b> | TY-2482_chromosome | - | 1241560 | 1241835 | 275.1839724 | 270.7950255 | 279.2934114 | 171.6983018 | 201.1331434 | 215.5318224 | 0.531277785  | 1.822656609 | 1.5170349 |
| <b>B7L9P6</b> | TY-2482_chromosome | + | 1242288 | 1243184 | 570.7976512 | 480.2000163 | 504.3111023 | 687.0332687 | 520.3874863 | 769.1996694 | -0.301185366 | 0.956533173 | 0.7659778 |
| <b>B7L9P7</b> | TY-2482_chromosome | + | 1243193 | 1244494 | 712.0624628 | 642.0375775 | 651.5492687 | 1039.931583 | 691.4448058 | 1052.148268 | -0.460765275 | 1.616566731 | 1.3395984 |
| <b>B7L9P8</b> | TY-2482_chromosome | + | 1244494 | 1245561 | 601.3220147 | 592.2821192 | 545.8188847 | 911.0403389 | 649.5919536 | 1008.609596 | -0.562185606 | 2.064271544 | 1.728178  |
| <b>B7L9P9</b> | TY-2482_chromosome | + | 1245564 | 1246628 | 674.4821989 | 637.355819  | 756.2245316 | 1011.570349 | 707.8332976 | 1088.902508 | -0.393896362 | 1.455227644 | 1.1958021 |
| <b>B7L9Q0</b> | TY-2482_chromosome | + | 1246631 | 1247218 | 379.115594  | 391.3512027 | 376.9256314 | 573.4577572 | 409.3370305 | 646.7846204 | -0.4995071   | 1.729533386 | 1.4384746 |
| <b>B7L9Q1</b> | TY-2482_chromosome | + | 1247221 | 1247955 | 540.6683391 | 561.1470557 | 519.4665128 | 720.1203633 | 478.4964847 | 719.3256063 | -0.266172267 | 0.574937781 | 0.4456024 |
| <b>B7L9Q2</b> | TY-2482_chromosome | + | 1247940 | 1248713 | 535.4210818 | 503.2597526 | 574.5736908 | 877.5780656 | 663.2803564 | 910.1187744 | -0.568627041 | 2.481890649 | 2.099925  |
| <b>B7L9Q3</b> | TY-2482_chromosome | + | 1248710 | 1249318 | 617.0163907 | 559.9086512 | 614.733942  | 798.5023549 | 769.8568063 | 866.8313614 | -0.401982341 | 1.576519739 | 1.3038514 |
| <b>B7L9Q4</b> | TY-2482_chromosome | - | 1249422 | 1250399 | 523.4060151 | 483.142375  | 607.7652481 | 1714.178487 | 1689.986541 | 1488.221749 | -1.569465314 | 13.25308504 | 12.171231 |
| <b>B7L9Q5</b> | TY-2482_chromosome | - | 1250546 | 1251709 | 237.7503313 | 244.7297963 | 245.6132843 | 319.5283207 | 246.5258554 | 278.9627042 | -0.242014418 | 0.541000891 | 0.4174615 |
| <b>B7L9Q6</b> | TY-2482_chromosome | - | 1251960 | 1253363 | 13144.73519 | 12640.23261 | 13810.90302 | 24410.51022 | 19426.71675 | 28404.95767 | -0.82246111  | 1.439425755 | 1.1833723 |
| <b>B7L9Q7</b> | TY-2482_chromosome | - | 1253487 | 1254302 | 973.5004948 | 1117.230125 | 1074.228133 | 1179.049236 | 1023.899448 | 523.3660015 | 0.082018788  | 0.432008191 | 0.3298087 |
| <b>B7L9Q8</b> | TY-2482_chromosome | - | 1254318 | 1255610 | 990.0299201 | 982.1633498 | 1123.293187 | 796.7850592 | 917.7138159 | 145.0045369 | 0.610033411  | 1.386385227 | 1.1373106 |
| <b>B7L9Q9</b> | TY-2482_chromosome | - | 1255595 | 1256815 | 728.547028  | 596.6553926 | 697.939119  | 691.0342876 | 648.2641188 | 51.61079327 | 0.391273564  | 0.63155358  | 0.4925604 |
| <b>Q93NP8</b> | TY-2482_chromosome | - | 1256824 | 1257933 | 415.6069822 | 418.3844147 | 522.0090713 | 301.3757845 | 312.5172062 | 11.99798388 | 0.961707573  | 1.549035466 | 1.2783238 |
| <b>B7L9R0</b> | TY-2482_chromosome | - | 1257933 | 1258880 | 475.4948064 | 542.5148434 | 487.8069299 | 463.0480559 | 352.3897607 | 12.00255022 | 0.593436157  | 0.973304527 | 0.7799363 |
| <b>B7L9R1</b> | TY-2482_chromosome | - | 1258968 | 1260128 | 1894.199338 | 2036.945747 | 1901.383797 | 2748.853876 | 1859.377867 | 83.16960869 | 0.042545376  | 0.255923286 | 0.1904173 |
| <b>B7L9R2</b> | TY-2482_chromosome | - | 1260128 | 1261390 | 2279.965042 | 2647.146266 | 2516.829636 | 4427.567983 | 2885.898603 | 108.1533809 | -0.27891422  | 0.002790503 | 0.0010743 |
| <b>B7L9R3</b> | TY-2482_chromosome | - | 1261399 | 1262436 | 3043.526712 | 3412.535314 | 3387.733249 | 5935.332474 | 3984.34671  | 164.7412601 | -0.301117701 | 0.019726689 | 0.0131107 |
| <b>B7L9R4</b> | TY-2482_chromosome | - | 1262444 | 1263001 | 1263.531525 | 1639.310352 | 1501.413869 | 2268.499175 | 1672.855035 | 121.3711819 | -0.163930321 | 0.093009978 | 0.0680408 |
| <b>B7L9R5</b> | TY-2482_chromosome | - | 1263425 | 1264315 | 1835.005394 | 1981.011862 | 2161.173187 | 3134.06315  | 2690.949133 | 3002.203663 | -0.562224863 | 0.967640888 | 0.7753111 |
| <b>B7L9R6</b> | TY-2482_chromosome | - | 1264561 | 1265553 | 2228.471836 | 2272.162106 | 2397.410929 | 3429.470848 | 3441.830673 | 3157.652737 | -0.54418963  | 0.89624562  | 0.7161873 |
| <b>B7L9R7</b> | TY-2482_chromosome | - | 1265714 | 1267105 | 61.60678378 | 42.97348967 | 50.74155146 | 32.76274335 | 33.66667979 | 34.19754475 | 0.691511421  | 1.955809405 | 1.6327233 |
| <b>B7L9R8</b> | TY-2482_chromosome | - | 1267119 | 1268336 | 29.37076428 | 23.7361352  | 22.20989594 | 41.19647988 | 22.58976357 | 35.42699508 | -0.412547729 | 0.922572698 | 0.5693436 |
| <b>B7L9R9</b> | TY-2482_chromosome | - | 1268336 | 1269613 | 67.59230854 | 48.0465449  | 55.34450638 | 58.27215369 | 70.14688184 | 58.05246454 | -0.067478859 | 0.204792639 | 0.1512905 |
| <b>B7L9T3</b> | TY-2482_chromosome | - | 1284132 | 1284968 | 30.12577781 | 25.87672416 | 21.46404678 | 29.96388124 | 25.49773316 | 16.28474258 | 0.02728745   | 0.099419755 | 0.0731715 |
| <b>B7L9T4</b> | TY-2482_chromosome | - | 1285149 | 1287308 | 33.20159011 | 19.97216354 | 26.32799396 | 41.36679726 | 23.53600986 | 27.83381278 | -0.198171803 | 0.304127479 | 0.2275268 |

|               |                    |   |         |         |             |             |             |             |             |             |              |             |            |
|---------------|--------------------|---|---------|---------|-------------|-------------|-------------|-------------|-------------|-------------|--------------|-------------|------------|
| <b>B7L9T7</b> | TY-2482_chromosome | + | 1289558 | 1291138 | 1845.65582  | 1782.993306 | 1881.712986 | 677.5009444 | 638.7541254 | 876.9871714 | 1.385355048  | 9.288346271 | 8.3968983  |
| <b>B7L9T8</b> | TY-2482_chromosome | - | 1291418 | 1293268 | 1166.716719 | 1105.231616 | 1062.160874 | 1173.437475 | 1291.40425  | 1182.837731 | -0.128458522 | 0.281064133 | 0.2098781  |
| <b>B7L9T9</b> | TY-2482_chromosome | - | 1293293 | 1293871 | 1182.589027 | 946.7691544 | 1022.596323 | 1308.735137 | 1386.932233 | 1355.099949 | -0.317057139 | 1.115965185 | 0.9023794  |
| <b>B7L9U0</b> | TY-2482_chromosome | - | 1293966 | 1294604 | 278.1245071 | 266.2700281 | 309.8697662 | 573.29963   | 537.7877866 | 605.0535306 | -0.965347486 | 5.893031414 | 5.2054254  |
| <b>B7L9U1</b> | TY-2482_chromosome | + | 1294922 | 1298236 | 1166.58348  | 1233.330495 | 1140.099323 | 766.3332468 | 844.5891107 | 717.2381587 | 0.574169412  | 2.73436766  | 2.3266602  |
| <b>B7L9U2</b> | TY-2482_chromosome | - | 1298281 | 1299135 | 201.9385463 | 188.7261261 | 202.063455  | 136.1840862 | 166.5640638 | 176.0570441 | 0.367463441  | 0.917681944 | 0.7332806  |
| <b>B7L9U3</b> | TY-2482_chromosome | + | 1299269 | 1300618 | 226.7217208 | 177.2331658 | 228.6377026 | 355.8747069 | 310.2169149 | 417.9697418 | -0.682285483 | 3.518567755 | 3.0223835  |
| <b>B7L9U4</b> | TY-2482_chromosome | - | 1300636 | 1302582 | 148.1566214 | 127.4380201 | 145.3113411 | 146.0002863 | 136.5114805 | 120.0005475 | 0.074090683  | 0.128351911 | 0.0937008  |
| <b>ryeC</b>   | TY-2482_chromosome | + | 1304134 | 1304282 | 58.7339354  | 50.88915262 | 32.33646707 | 31.45518641 | 86.05957142 | 23.26367397 | -0.050672265 | 0           | 0          |
| <b>ryeD</b>   | TY-2482_chromosome | + | 1304469 | 1304611 | 73.70773173 | 50.46798675 | 51.84973925 | 18.9481837  | 59.64930654 | 15.26750457 | 0.946838063  | 2.054816642 | 1.7193416  |
| <b>B7L9U7</b> | TY-2482_chromosome | + | 1305203 | 1306447 | 89.22134345 | 73.00953403 | 73.08523525 | 80.68672276 | 80.97319757 | 86.74805292 | -0.045950775 | 0.124780654 | 0.0919807  |
| <b>B7L9U8</b> | TY-2482_chromosome | + | 1306450 | 1309569 | 181.5406407 | 227.4856292 | 185.9979764 | 232.89944   | 220.1343505 | 303.3923435 | -0.369542061 | 0.989426513 | 0.7936753  |
| <b>B7L9U9</b> | TY-2482_chromosome | + | 1309573 | 1312647 | 266.4572116 | 242.0668671 | 206.927432  | 234.9709647 | 229.2840282 | 269.4612713 | -0.031497288 | 0.062116157 | 0.0438478  |
| <b>B7L9V0</b> | TY-2482_chromosome | + | 1312651 | 1314063 | 83.56023424 | 106.609159  | 89.01006143 | 69.25758611 | 67.23625202 | 104.5597009 | 0.214082643  | 0.437870048 | 0.3342233  |
| <b>B7L9V1</b> | TY-2482_chromosome | + | 1314063 | 1315463 | 123.4521014 | 109.2129115 | 122.1948761 | 139.8896545 | 120.9446106 | 153.6745509 | -0.17833369  | 0.549883581 | 0.424818   |
| <b>B7L9V2</b> | TY-2482_chromosome | + | 1315463 | 1316182 | 402.3661502 | 399.1854333 | 378.1784064 | 312.9238812 | 359.4880565 | 381.326187  | 0.18534927   | 0.372277104 | 0.2819541  |
| <b>B7L9V3</b> | TY-2482_chromosome | + | 1316376 | 1316705 | 83.10952877 | 70.65771079 | 79.2392446  | 51.39074823 | 93.113586   | 47.90212465 | 0.311066952  | 0.567673726 | 0.4394236  |
| <b>B7L9V4</b> | TY-2482_chromosome | + | 1316917 | 1317210 | 157.6858628 | 169.7845479 | 167.7175108 | 76.72624371 | 94.76669357 | 66.16565392 | 1.031444996  | 6.438333023 | 5.7185066  |
| <b>B7L9V5</b> | TY-2482_chromosome | + | 1317215 | 1317508 | 131.62753   | 140.802138  | 117.9173928 | 74.70720071 | 85.59279719 | 76.40244422 | 0.68539419   | 3.443503824 | 2.9547132  |
| <b>B7L9V6</b> | TY-2482_chromosome | + | 1317614 | 1318972 | 297.6662589 | 286.259836  | 289.1358212 | 430.2421973 | 344.7800057 | 466.7256289 | -0.49078264  | 1.852616945 | 1.5442942  |
| <b>B7L9V9</b> | TY-2482_chromosome | + | 1320037 | 1320933 | 144.3486288 | 139.4215483 | 141.2532465 | 239.4508953 | 283.0832184 | 259.2157017 | -0.859151228 | 4.771801621 | 4.1655822  |
| <b>B7L9W0</b> | TY-2482_chromosome | - | 1321021 | 1321797 | 337.2160234 | 337.7792792 | 355.275889  | 297.5570607 | 296.690238  | 271.1973956 | 0.246964418  | 0.678647878 | 0.5325198  |
| <b>B7L9W8</b> | TY-2482_chromosome | - | 1327574 | 1328623 | 443.3153948 | 499.1112973 | 477.3480975 | 1055.171796 | 991.8647109 | 1299.394513 | -1.22526215  | 9.203597283 | 8.3158391  |
| <b>B7L9W9</b> | TY-2482_chromosome | + | 1328880 | 1330154 | 34.23938977 | 40.69431692 | 38.99478893 | 56.71950749 | 45.43407031 | 50.05063675 | -0.461561642 | 1.067367544 | 0.8608812  |
| <b>B7L9X0</b> | TY-2482_chromosome | + | 1330154 | 1331155 | 103.9906971 | 84.31025519 | 111.8393802 | 152.7985106 | 139.1241526 | 202.0447324 | -0.605348799 | 3.059263616 | 2.6129042  |
| <b>B7L9X1</b> | TY-2482_chromosome | + | 1331155 | 1332117 | 136.088222  | 134.2248143 | 137.3283186 | 169.0716976 | 110.8395264 | 174.6190685 | -0.150298281 | 0.325645123 | 0.2449387  |
| <b>B7L9X2</b> | TY-2482_chromosome | - | 1332097 | 1332840 | 226.6091485 | 207.0666706 | 233.8328002 | 209.7334625 | 176.4865066 | 188.2034065 | 0.229606338  | 0.561620741 | 0.434802   |
| <b>B7L9X4</b> | TY-2482_chromosome | - | 1333778 | 1334575 | 62.78379665 | 68.80589386 | 59.24368682 | 50.75488829 | 49.17057175 | 38.49971002 | 0.390298117  | 1.288603267 | 1.051026   |
| <b>B7L9X5</b> | TY-2482_chromosome | - | 1334575 | 1335360 | 35.79466029 | 40.70428196 | 37.59396406 | 60.20005882 | 43.59994783 | 46.22916169 | -0.461561642 | 0.967904573 | 0.7754118  |
| <b>E11695</b> | TY-2482_chromosome | + | 1335391 | 1335594 | 64.92103033 | 74.1723356  | 70.6510508  | 33.14359261 | 54.8245659  | 29.41147193 | 0.806152357  | 3.002957066 | 2.5629339  |
| <b>B7L9X6</b> | TY-2482_chromosome | - | 1335586 | 1335855 | 93.50624444 | 92.691197   | 87.68646775 | 33.80349455 | 50.19216419 | 35.73978422 | 1.19375681   | 6.505583273 | 5.7817449  |
| <b>B7L9X7</b> | TY-2482_chromosome | + | 1335976 | 1336797 | 26.66052894 | 35.39689611 | 35.1520628  | 35.01531835 | 27.22920398 | 31.58825084 | 0.006737655  | 0.040525225 | 0.0276813  |
| <b>B7L9X8</b> | TY-2482_chromosome | + | 1336839 | 1337354 | 291.42874   | 351.9052585 | 330.1423317 | 351.0358503 | 465.1778744 | 354.1655632 | -0.294842938 | 0.688575587 | 0.539909   |
| <b>B7L9Y0</b> | TY-2482_chromosome | - | 1338492 | 1340969 | 36.43062824 | 45.65140938 | 43.6525193  | 23.2423348  | 20.94580258 | 14.83817444 | 1.005800435  | 3.885057748 | 3.3537881  |
| <b>B7L9Y3</b> | TY-2482_chromosome | - | 1341743 | 1342282 | 57.34328791 | 80.25596265 | 61.89667977 | 14.83348325 | 16.67506251 | 4.256668178 | 3.014254397  | 20.10536182 | 18.1817084 |
| <b>B7L9Y4</b> | TY-2482_chromosome | - | 1342578 | 1342856 | 54.42854825 | 57.17754486 | 66.26942397 | 51.68770281 | 67.46722077 | 47.67685653 | 0.106669137  | 0.143334477 | 0.1045413  |
| <b>B7L9Y5</b> | TY-2482_chromosome | - | 1343122 | 1344228 | 5142.939663 | 4663.218843 | 5132.728644 | 6680.863567 | 5825.138906 | 7398.721765 | -0.369652714 | 0.558769552 | 0.4321783  |
| <b>B7L9Y6</b> | TY-2482_chromosome | + | 1344360 | 1346390 | 1584.065485 | 1445.432108 | 1394.228937 | 1478.361324 | 1574.274014 | 2452.683116 | -0.225638955 | 0.796511648 | 0.6325716  |
| <b>D3GZY0</b> | TY-2482_chromosome | + | 1346534 | 1350325 | 109.4018596 | 90.99986371 | 90.91847326 | 94.88789954 | 55.30046265 | 100.8495818 | 0.239381703  | 0.445587925 | 0.3403679  |
| <b>C8U658</b> | TY-2482_chromosome | + | 1350332 | 1353967 | 146.7469118 | 129.3223393 | 125.2474617 | 152.4197277 | 129.1335229 | 161.6126627 | -0.127129279 | 0.313455961 | 0.2350353  |
| <b>C8U663</b> | TY-2482_chromosome | + | 1356687 | 1358963 | 54.73160401 | 36.04265891 | 56.38604344 | 59.71185443 | 50.86270516 | 70.69749696 | -0.171248013 | 0.58559691  | 0.4545251  |
| <b>C6V1M4</b> | TY-2482_chromosome | + | 1358959 | 1360092 | 30.48076393 | 48.14388025 | 27.30841398 | 30.42712392 | 27.29995121 | 22.64355013 | 0.208528875  | 0.687762125 | 0.5396531  |
| <b>C8TU47</b> | TY-2482_chromosome | + | 1360092 | 1362089 | 86.4936126  | 114.3078963 | 98.32711061 | 61.44986659 | 51.85703414 | 43.77121201 | 0.82127121   | 4.287496425 | 3.7244483  |
| <b>D3GZY8</b> | TY-2482_chromosome | + | 1362205 | 1362675 | 36.58602474 | 32.20314304 | 42.51002961 | 28.78116907 | 38.35657106 | 22.78362392 | 0.34025268   | 0.570482234 | 0.4417205  |
| <b>D6BS4</b>  | TY-2482_chromosome | - | 1362722 | 1363246 | 545.7633429 | 625.1099431 | 581.62784   | 513.576185  | 578.8977808 | 424.070815  | 0.153252757  | 0.496938871 | 0.3819094  |
| <b>B7L9Z1</b> | TY-2482_chromosome | - | 1363239 | 1363955 | 371.4558236 | 444.6609092 | 417.2859397 | 519.4403232 | 351.1439982 | 406.6701291 | -0.127990313 | 0.089587559 | 0.0656251  |
| <b>B7L9Z2</b> | TY-2482_chromosome | - | 1363955 | 1365967 | 565.3851478 | 586.661     | 514.084348  | 832.9640677 | 749.8597107 | 711.9587008 | -0.516894605 | 1.680886884 | 1.3946372  |
| <b>B7L9Z3</b> | TY-2482_chromosome | + | 1365859 | 1366587 | 195.8463971 | 237.5007903 | 176.570767  | 144.8600109 | 171.1339645 | 163.1087861 | 0.286692231  | 1.01206171  | 0.8130124  |
| <b>D7YJB0</b> | TY-2482_chromosome | - | 1366590 | 1366778 | 142.2088541 | 145.8007393 | 111.8050383 | 86.18019965 | 135.7840882 | 97.57467831 | 0.293757355  | 0.819768791 | 0.6520649  |
| <b>B7L9Z5</b> | TY-2482_chromosome | - | 1366741 | 1367469 | 259.419902  | 292.5548981 | 250.6909953 | 217.591031  | 289.4866966 | 261.7773585 | 0.04804719   | 0.112272459 | 0.0820132  |
| <b>B7L9Z6</b> | TY-2482_chromosome | - | 1367477 | 1368400 | 245.0829541 | 324.6145347 | 242.6612698 | 258.7014845 | 217.3763874 | 306.1028723 | -0.011750959 | 0.08708571  | 0.0636258  |
| <b>B7L9Z7</b> | TY-2482_chromosome | - | 1368396 | 1369550 | 340.2347167 | 337.7270709 | 347.9648841 | 441.1855674 | 420.3750106 | 512.7931148 | -0.391613768 | 1.395271929 | 1.1446749  |
| <b>B7L9Z8</b> | TY-2482_chromosome | - | 1369560 | 1370474 | 404.3941304 | 438.0543927 | 474.917015  | 528.5138901 | 562.4191725 | 564.3638994 | -0.311300891 | 1.001655534 | 0.8036583  |
| <b>B7L9Z9</b> | TY-2482_chromosome | - | 1370688 | 1372982 | 1320.693882 | 1270.336305 | 1314.527545 | 1639.281357 | 1720.279545 | 1815.148871 | -0.249154201 | 0.71177864  | 0.5597483  |
| <b>B7LA00</b> | TY-2482_chromosome | + | 1373178 | 1374890 | 2805.81292  | 2772.226083 | 3067.614837 | 8422.613346 | 6574.064914 | 9198.410019 | -1.45135914  | 3.905943284 | 3.3737024  |
| <b>B7LA01</b> | TY-2482_chromosome | - | 1374934 | 1375863 | 723.8245642 | 749.6219924 | 763.2725573 | 929.0062452 | 1042.026578 | 1057.650514 | -0.416397719 | 1.663700996 | 1.37947    |
| <b>B5YW61</b> | TY-2482_chromosome | - | 1376040 | 1376648 | 132.3801519 | 136.1194904 | 122.6242669 | 85.0713092  | 109.2971665 | 92.19850914 | 0.439929239  | 1.5789707   | 1.3057672  |

|         |                    |   |         |         |             |             |             |             |             |             |              |             |           |
|---------|--------------------|---|---------|---------|-------------|-------------|-------------|-------------|-------------|-------------|--------------|-------------|-----------|
| D3H001  | TY-2482_chromosome | + | 1376758 | 1377369 | 376.3159592 | 332.9631453 | 333.9372651 | 185.3675969 | 257.6533749 | 226.2745011 | 0.686339033  | 2.63630325  | 2.237029  |
| B7LA04  | TY-2482_chromosome | - | 1377505 | 1378263 | 225.9123756 | 201.8926145 | 221.8747472 | 82.35845964 | 95.54325488 | 111.4794032 | 1.241082749  | 8.085603757 | 7.2562048 |
| C6V2L9  | TY-2482_chromosome | + | 1380069 | 1380398 | 153.2093766 | 169.3817422 | 156.3973893 | 97.94440548 | 145.7249921 | 128.8624036 | 0.377771508  | 1.091558574 | 0.8819998 |
| B7LA06  | TY-2482_chromosome | - | 1380435 | 1381379 | 146.3525288 | 200.7660031 | 145.5976231 | 195.6784266 | 188.3469254 | 202.540085  | -0.348065653 | 0.682810094 | 0.5355383 |
| B7LA07  | TY-2482_chromosome | + | 1381618 | 1382013 | 1093.247138 | 1072.3655   | 1226.93938  | 260.5031977 | 442.4057364 | 436.4062844 | 1.680862936  | 11.72231609 | 10.711129 |
| B7LA08  | TY-2482_chromosome | + | 1382013 | 1382705 | 1833.637836 | 1770.433271 | 2004.659362 | 704.5030694 | 1182.309778 | 1066.760026 | 1.01726042   | 4.459386262 | 3.8831848 |
| B7LA09  | TY-2482_chromosome | + | 1382838 | 1383719 | 1300.282411 | 1439.876492 | 1536.569744 | 4088.728157 | 3742.05493  | 4509.685462 | -1.511814435 | 4.631683539 | 4.0397807 |
| B7LA10  | TY-2482_chromosome | + | 1383872 | 1384588 | 136.2866171 | 102.4979463 | 130.176664  | 141.6041739 | 161.1030788 | 160.4331785 | -0.239220318 | 0.940212822 | 0.7526283 |
| B7LAG5  | TY-2482_chromosome | + | 1384594 | 1384830 | 75.59386068 | 74.51778854 | 67.14576054 | 31.71358853 | 28.19865281 | 25.21123837 | 1.302757716  | 7.509270508 | 6.7267198 |
| B7LAG6  | TY-2482_chromosome | + | 1385152 | 1386387 | 76.89621883 | 89.31258558 | 80.47849076 | 720.9132989 | 512.2271231 | 613.113587  | -2.96865428  | 34.75132655 | 33.141199 |
| B7LAG7  | TY-2482_chromosome | + | 1386413 | 1387616 | 98.94830698 | 73.85936225 | 87.12019252 | 515.1054878 | 396.6560101 | 507.6579721 | -2.396732566 | 26.88398223 | 25.455086 |
| B7LAG8  | TY-2482_chromosome | - | 1387693 | 1388700 | 548.9274061 | 525.9455267 | 545.3532312 | 110.7865172 | 122.8744293 | 122.3039265 | 2.212632251  | 24.51782894 | 23.116162 |
| B7LAG9  | TY-2482_chromosome | - | 1388719 | 1390236 | 261.0036726 | 274.8841983 | 237.4423306 | 89.52278308 | 49.89920298 | 58.16742523 | 1.862639815  | 17.22666908 | 16.014481 |
| B7LAH0  | TY-2482_chromosome | - | 1390300 | 1391295 | 439.7528152 | 452.8040797 | 400.5359547 | 214.4261101 | 183.7993558 | 171.2993818 | 1.120486911  | 7.905619961 | 7.0923331 |
| B7LAH1  | TY-2482_chromosome | - | 1391578 | 1392615 | 53.67049243 | 32.48182298 | 30.55236868 | 56.49536297 | 43.55178512 | 66.69239044 | -0.446570878 | 1.200518013 | 0.9744621 |
| B7LAH3  | TY-2482_chromosome | - | 1392760 | 1393914 | 328.357836  | 316.9497204 | 304.8955415 | 663.2896162 | 645.2046002 | 664.3843926 | -1.057041903 | 6.847755586 | 6.1101633 |
| B7LAH4  | TY-2482_chromosome | - | 1393934 | 1394599 | 1379.266523 | 1093.727724 | 1210.138934 | 2251.664602 | 2431.649743 | 2616.575509 | -0.918403274 | 4.233007278 | 3.6754087 |
| B7LAH6  | TY-2482_chromosome | + | 1394857 | 1395690 | 713.5733777 | 609.1386118 | 673.4445005 | 548.0685155 | 578.7527937 | 687.7175032 | 0.210076081  | 0.300623203 | 0.2249297 |
| B7LAH7  | TY-2482_chromosome | - | 1395728 | 1397716 | 214.0385208 | 215.3495056 | 163.2538493 | 102.5497154 | 95.53313889 | 94.81875322 | 0.953269991  | 6.076170812 | 5.3796679 |
| B7LAH9  | TY-2482_chromosome | - | 1398012 | 1399478 | 859.2381418 | 895.9902697 | 832.4273028 | 1288.340905 | 1278.57628  | 1471.941456 | -0.640041154 | 2.735442415 | 2.3274916 |
| D7JPX3  | TY-2482_chromosome | - | 1399465 | 1399644 | 105.2848342 | 104.1059251 | 130.4314353 | 118.9324556 | 107.3342274 | 118.3598749 | 0.020322988  | 0.022762347 | 0.0152692 |
| B7LAI0  | TY-2482_chromosome | - | 1399686 | 1400564 | 943.6782625 | 999.2414789 | 988.3773774 | 862.2655929 | 856.3491588 | 856.4976686 | 0.177144518  | 0.490656273 | 0.3767415 |
| B7LAI1  | TY-2482_chromosome | + | 1400663 | 1401709 | 195.1826389 | 186.0614625 | 198.7775342 | 206.7672213 | 212.0334469 | 218.3466938 | -0.109680323 | 0.295824281 | 0.221375  |
| B7LAI2  | TY-2482_chromosome | + | 1401786 | 1402640 | 510.7789793 | 477.3622712 | 524.9751167 | 1008.859954 | 859.0027725 | 1006.334384 | -0.902611447 | 5.344087693 | 4.6963125 |
| B7LAI3  | TY-2482_chromosome | + | 1402647 | 1403732 | 479.4011962 | 458.852255  | 462.1069419 | 830.7197836 | 738.8687077 | 931.159675  | -0.812735227 | 4.427898118 | 3.8556237 |
| B7LAI4  | TY-2482_chromosome | - | 1403794 | 1405041 | 83.6700354  | 105.8754524 | 73.54548283 | 39.86555624 | 46.44781313 | 43.43222937 | 0.935881439  | 4.616871686 | 4.0268241 |
| B5YVW4  | TY-2482_chromosome | + | 1406212 | 1406907 | 23.72795649 | 28.26429673 | 30.55844851 | 32.10367288 | 33.67678301 | 32.91621241 | -0.256316874 | 0.425139071 | 0.324382  |
| B7LAI7  | TY-2482_chromosome | - | 1406981 | 1408228 | 52.90966854 | 68.08053902 | 56.67327877 | 43.19152931 | 32.72737579 | 26.72234676 | 0.665294543  | 2.621962198 | 2.2241173 |
| B7LAJ0  | TY-2482_chromosome | - | 1410616 | 1412304 | 6444.432792 | 9101.231459 | 8607.000534 | 1084.215511 | 652.3018982 | 945.7961847 | 3.090541405  | 13.73102949 | 12.635165 |
| B7LAJ1  | TY-2482_chromosome | - | 1412324 | 1413259 | 6788.43877  | 9773.203237 | 8878.950747 | 593.8194853 | 324.6645833 | 480.1472241 | 4.079209562  | 20.92663225 | 19.617535 |
| B7LAJ2  | TY-2482_chromosome | - | 1413262 | 1414389 | 12374.26846 | 14593.73185 | 13968.63115 | 579.4146282 | 304.6311592 | 465.661895  | 4.849354651  | 25.32122082 | 23.909848 |
| B7LAJ3  | TY-2482_chromosome | + | 1414757 | 1415935 | 120.4436459 | 118.4526731 | 111.4350736 | 87.03789822 | 74.607365   | 64.80100196 | 0.576928402  | 2.714482938 | 2.309927  |
| D7YNX5  | TY-2482_chromosome | + | 1416089 | 1416913 | 728.3320368 | 747.0442594 | 753.3406896 | 674.9569768 | 713.480911  | 730.1009631 | 0.084688471  | 0.147648031 | 0.1075001 |
| B7LAJ6  | TY-2482_chromosome | + | 1417139 | 1418602 | 1281.794997 | 1190.991005 | 1336.441516 | 330.3544052 | 327.4477755 | 613.1572978 | 1.7194062    | 11.04579008 | 10.07129  |
| B7LAJ7  | TY-2482_chromosome | + | 1418723 | 1419706 | 346.1861757 | 310.7479158 | 401.1269423 | 731.6526776 | 653.3488653 | 745.844362  | -0.949608404 | 5.957455579 | 5.2675259 |
| B7LAJ8  | TY-2482_chromosome | + | 1419748 | 1420458 | 388.8010928 | 421.8201602 | 387.4469504 | 878.5269382 | 1016.598782 | 876.3636674 | -1.234164525 | 8.640527142 | 7.7805221 |
| B7LAJ9  | TY-2482_chromosome | + | 1420873 | 1421436 | 1410.564758 | 1255.156628 | 1276.121085 | 2281.718712 | 3549.485443 | 2024.036784 | -0.987801994 | 3.405207319 | 2.9207933 |
| B7LAK0  | TY-2482_chromosome | + | 1421620 | 1423173 | 502.7257299 | 466.1886403 | 412.3249466 | 264.9763354 | 330.4223933 | 299.9728313 | 0.632466593  | 2.599043963 | 2.2054214 |
| B7LAK1  | TY-2482_chromosome | + | 1423258 | 1425069 | 642.2667999 | 690.1677296 | 695.2830128 | 324.8653759 | 382.2901252 | 335.5979401 | 0.959386833  | 5.622994808 | 4.9584061 |
| B7LAK2  | TY-2482_chromosome | + | 1425073 | 1426164 | 288.9658705 | 215.6436959 | 246.1869583 | 163.9472094 | 179.2802789 | 189.3059931 | 0.572178196  | 1.806841223 | 1.5033301 |
| B7LAK3  | TY-2482_chromosome | + | 1426167 | 1427189 | 268.9086394 | 209.4355083 | 185.0578636 | 178.2943062 | 202.941264  | 222.0954364 | 0.180470939  | 0.279750122 | 0.2089003 |
| B7LAK4  | TY-2482_chromosome | + | 1427194 | 1428780 | 590.1783828 | 538.7670543 | 523.395285  | 571.1889077 | 621.5868871 | 603.871238  | -0.106130835 | 0.253184062 | 0.188231  |
| B7LAK5  | TY-2482_chromosome | - | 1428790 | 1429131 | 528.6411928 | 571.296124  | 532.7218813 | 141.7077929 | 162.9633452 | 139.6208339 | 1.854072782  | 18.6783882  | 17.427233 |
| B7LAK6  | TY-2482_chromosome | - | 1429467 | 1430654 | 525.7741092 | 490.0597104 | 514.980391  | 505.9021167 | 683.5656134 | 580.2558725 | -0.168879266 | 0.498611306 | 0.3833337 |
| B7LAK7  | TY-2482_chromosome | - | 1430685 | 1431377 | 591.6441256 | 556.575894  | 529.9898845 | 605.1467734 | 759.9740542 | 682.8295739 | -0.26875756  | 0.796020576 | 0.6322193 |
| B7LAK8  | TY-2482_chromosome | + | 1431526 | 1433283 | 617.0859758 | 574.6535477 | 547.1459541 | 340.4189983 | 396.7768488 | 450.9076903 | 0.593762671  | 2.137947214 | 1.7935216 |
| Q1R9N3  | TY-2482_chromosome | - | 1433399 | 1433827 | 6480.174032 | 5886.169921 | 5689.715224 | 2881.102462 | 4862.682326 | 3093.420825 | 0.75734472   | 1.256978638 | 1.0233302 |
| B7LAL0  | TY-2482_chromosome | - | 1433837 | 1434841 | 580.3060627 | 546.9347753 | 609.5209684 | 1032.346573 | 992.8298954 | 1069.520976 | -0.801301437 | 4.728180538 | 4.1245954 |
| B7LAL1  | TY-2482_chromosome | + | 1435023 | 1435247 | 325.2579501 | 324.8903787 | 340.0782988 | 363.2888661 | 517.9411065 | 451.2391934 | -0.384410143 | 1.373840951 | 1.1264516 |
| B7LAL2  | TY-2482_chromosome | + | 1435270 | 1437027 | 822.8536011 | 693.819571  | 697.0191809 | 890.015549  | 1157.644432 | 1154.910881 | -0.470080619 | 2.111406562 | 1.6797065 |
| B5YVWY3 | TY-2482_chromosome | - | 1437287 | 1439875 | 239.847587  | 289.9504709 | 264.0648141 | 155.004908  | 148.3119326 | 153.9292988 | 0.754105872  | 4.073076369 | 3.5270054 |
| B7LAL6  | TY-2482_chromosome | + | 1440195 | 1440839 | 197.8605411 | 138.3711276 | 148.9653884 | 79.21055945 | 96.53049803 | 85.58031484 | 0.956092807  | 4.638920209 | 4.0466454 |
| B7LAL7  | TY-2482_chromosome | - | 1440880 | 1441929 | 444.3997693 | 362.1183166 | 409.3421946 | 326.4555028 | 309.3936062 | 313.1692292 | 0.394529245  | 1.109926036 | 0.8972729 |
| Q0TFP6  | TY-2482_chromosome | - | 1441856 | 1442483 | 236.6286852 | 181.7625118 | 192.6064027 | 211.6132563 | 179.2015919 | 206.4842897 | 0.06595783   | 0.060363164 | 0.0426374 |
| B7LAL9  | TY-2482_chromosome | - | 1442483 | 1444423 | 349.3721322 | 327.2139039 | 301.4893318 | 267.1584943 | 237.4128828 | 327.1344499 | 0.258423304  | 0.575487025 | 0.4459566 |
| B7LAM0  | TY-2482_chromosome | - | 1444423 | 1444899 | 115.851995  | 97.3980393  | 139.7649536 | 47.23785866 | 36.26320545 | 60.01213829 | 1.411121317  | 7.625240553 | 6.8333624 |
| B7LAM1  | TY-2482_chromosome | - | 1444899 | 1445105 | 74.18244952 | 44.54951116 | 80.998272   | 26.32771739 | 17.14474793 | 32.44194658 | 1.555255582  | 6.074653718 | 5.3786236 |

|        |                    |   |         |         |             |             |             |             |             |             |              |             |           |
|--------|--------------------|---|---------|---------|-------------|-------------|-------------|-------------|-------------|-------------|--------------|-------------|-----------|
| B7LAM2 | TY-2482_chromosome | - | 1445105 | 1445839 | 281.2025383 | 258.5254211 | 288.6191157 | 90.40705587 | 112.0280916 | 90.96400138 | 1.529139639  | 12.56260964 | 11.51179  |
| B7LAM3 | TY-2482_chromosome | - | 1445884 | 1446543 | 221.4463111 | 208.8730116 | 201.22251   | 43.45140887 | 41.86798751 | 37.03881473 | 2.343953569  | 27.55019641 | 26.105695 |
| B7LAM4 | TY-2482_chromosome | - | 1446543 | 1447163 | 511.5043542 | 502.6234735 | 517.6352396 | 84.92429113 | 72.75625842 | 75.09042165 | 2.70483815   | 34.01966818 | 32.443108 |
| B7LAM5 | TY-2482_chromosome | - | 1447179 | 1447778 | 634.9157774 | 631.1542632 | 619.8920991 | 63.69943315 | 68.29859248 | 56.80386116 | 3.301382997  | 47.91079427 | 46.064362 |
| B7LAM7 | TY-2482_chromosome | - | 1448237 | 1449097 | 659.5191761 | 743.2114362 | 628.3112575 | 27.61827252 | 18.04886648 | 35.02410455 | 4.633908367  | 69.04901956 | 66.804647 |
| B7LAM8 | TY-2482_chromosome | - | 1449087 | 1449779 | 1044.815277 | 974.0952812 | 971.1021759 | 41.65943596 | 29.01124383 | 38.09003218 | 4.76911205   | 78.24834233 | 75.793117 |
| B7LAM9 | TY-2482_chromosome | - | 1449789 | 1452272 | 7246.592418 | 6731.394137 | 7241.498216 | 118.5680795 | 65.28653593 | 127.0921025 | 6.119842518  | 37.32726616 | 35.659147 |
| B7LAN0 | TY-2482_chromosome | - | 1452272 | 1452532 | 985.0573719 | 812.9476538 | 937.5859459 | 5.817588654 | 3.550087397 | 10.10812766 | 7.227621152  | 109.7363976 | 106.55417 |
| B7LAN1 | TY-2482_chromosome | - | 1452525 | 1453016 | 2523.593824 | 1792.455001 | 2093.516056 | 10.53218435 | 8.129085202 | 11.71072986 | 7.785285601  | 124.9349871 | 121.57667 |
| B7LAN3 | TY-2482_chromosome | + | 1453424 | 1453909 | 1662.382393 | 1710.35446  | 1713.97337  | 2151.388986 | 2300.652955 | 2036.756207 | -0.361436871 | 0.759336404 | 0.6015977 |
| B7LAN4 | TY-2482_chromosome | - | 1454064 | 1455707 | 1302.617542 | 1304.082048 | 1483.781372 | 1235.892813 | 1173.911531 | 1344.380271 | 0.161705097  | 0.26242986  | 0.195261  |
| B7LAN5 | TY-2482_chromosome | - | 1455928 | 1457568 | 135.2454709 | 144.1960172 | 146.6325076 | 101.6389463 | 71.79192099 | 79.10257512 | 0.708825668  | 3.595700645 | 3.0904745 |
| B7LAN6 | TY-2482_chromosome | - | 1457647 | 1458294 | 115.0721226 | 106.9392481 | 135.6769883 | 100.4729424 | 94.6044411  | 103.8609186 | 0.313045078  | 0.720631997 | 0.5675207 |
| B7LAN7 | TY-2482_chromosome | - | 1458297 | 1459358 | 322.4844854 | 261.7436988 | 303.0840028 | 267.2041362 | 283.0473704 | 267.1466635 | 0.167360247  | 0.26054363  | 0.1938188 |
| B7LAN8 | TY-2482_chromosome | - | 1459435 | 1460487 | 153.2626946 | 176.209441  | 137.6647894 | 236.2917927 | 227.4530646 | 272.0725354 | -0.696312985 | 2.80221826  | 2.3854176 |
| B7LAN9 | TY-2482_chromosome | - | 1460602 | 1461702 | 42822.56301 | 48522.71515 | 48040.74251 | 140874.1864 | 132184.9248 | 154584.5342 | -1.619068486 | 3.65348923  | 3.1421289 |
| B7LAP0 | TY-2482_chromosome | + | 1462441 | 1465110 | 2273.316276 | 2472.352143 | 2380.124572 | 2467.167169 | 2572.707816 | 2682.448982 | -0.119517786 | 0.131271395 | 0.0958983 |
| B7LAP1 | TY-2482_chromosome | + | 1465130 | 1465777 | 2339.901762 | 2336.819784 | 2559.223558 | 3497.599904 | 3587.410698 | 3746.79332  | -0.553064791 | 0.992803164 | 0.7967531 |
| B7LAP2 | TY-2482_chromosome | - | 1465983 | 1468781 | 1090.37392  | 1046.186467 | 1066.908386 | 1537.944209 | 1560.721371 | 1641.80665  | -0.546513307 | 2.266921411 | 1.9083886 |
| B7LAP4 | TY-2482_chromosome | - | 1469888 | 1471534 | 40.93624494 | 52.84714667 | 45.50626138 | 76.0873383  | 70.0873383  | 63.11477253 | -0.485595685 | 0.962773876 | 0.7711304 |
| B7LAP5 | TY-2482_chromosome | - | 1471538 | 1476154 | 231.6214014 | 311.5096475 | 225.4538569 | 188.3557598 | 207.5305104 | 189.5470145 | 0.293672304  | 1.177505081 | 0.9566927 |
| B7LAP7 | TY-2482_chromosome | - | 1476696 | 1478381 | 89.29009786 | 72.73897664 | 66.34481536 | 124.6781592 | 99.16758004 | 82.03787108 | -0.475537042 | 1.254558792 | 1.021399  |
| B7LAP8 | TY-2482_chromosome | - | 1478533 | 1481157 | 9278.632642 | 7895.910985 | 8207.923118 | 18150.71807 | 14661.71879 | 18914.34961 | -0.996985219 | 1.951475549 | 1.6289897 |
| B7LAP9 | TY-2482_chromosome | + | 1481304 | 1482023 | 385.2320006 | 343.4805991 | 366.4105509 | 785.1916863 | 951.0889962 | 815.8175162 | -1.187998085 | 8.424168931 | 7.5730343 |
| B7LAQ0 | TY-2482_chromosome | - | 1482157 | 1485888 | 189.8833278 | 224.8403323 | 170.6450925 | 149.1338744 | 141.0333516 | 143.4476286 | 0.353199205  | 1.451741125 | 1.1932448 |
| B3HLS5 | TY-2482_chromosome | - | 1486316 | 1486585 | 82.22191648 | 84.90959534 | 82.48275688 | 130.4310603 | 135.5551971 | 162.8127995 | -0.75429756  | 3.876192957 | 3.3452466 |
| B7LAQ1 | TY-2482_chromosome | + | 1486584 | 1488866 | 2566.709995 | 2316.29483  | 2334.474795 | 6111.784265 | 6131.834555 | 8449.58025  | -1.452237594 | 4.164310671 | 3.6108157 |
| B7LAQ2 | TY-2482_chromosome | + | 1488958 | 1490085 | 1947.460479 | 1711.514758 | 1906.81137  | 4726.213576 | 4896.949784 | 5659.491    | -1.3934941   | 4.134810588 | 3.5830141 |
| B7LAQ3 | TY-2482_chromosome | + | 1490088 | 1490339 | 369.5178806 | 318.1705558 | 366.5211048 | 856.9558473 | 848.1416085 | 903.7470717 | -1.257075439 | 9.719486153 | 8.8067747 |
| B7LAQ4 | TY-2482_chromosome | - | 1490399 | 1491046 | 293.9158913 | 325.6163489 | 249.1631263 | 336.2148374 | 333.0643118 | 339.430293  | -0.27738658  | 0.540457815 | 0.4172917 |
| P0CE57 | TY-2482_chromosome | + | 1491303 | 1492283 | 212.3549857 | 240.6523657 | 189.15145   | 138.8202903 | 114.5983556 | 123.733866  | 0.687062822  | 3.723358855 | 3.2038923 |
| B5YX24 | TY-2482_chromosome | + | 1492425 | 1492664 | 12.87781081 | 8.64329895  | 9.780580546 | 138.9601402 | 118.2875475 | 102.9787967 | -3.510632713 | 32.70023554 | 31.1481   |
| B7LAQ7 | TY-2482_chromosome | - | 1492712 | 1493785 | 483.8034003 | 477.0081638 | 509.1250267 | 34336.7971  | 24871.59375 | 27633.32474 | -5.910033518 | 31.06997822 | 29.553647 |
| B7LAQ8 | TY-2482_chromosome | - | 1493793 | 1495148 | 442.676827  | 428.2751571 | 470.8702103 | 42755.27129 | 32112.88096 | 36047.94173 | -6.378876689 | 34.11282899 | 32.525365 |
| A7ZP61 | TY-2482_chromosome | + | 1495199 | 1495393 | 9.723031704 | 11.95321851 | 7.696904307 | 550.7598809 | 448.6008809 | 435.7286743 | -5.718597935 | 76.90778191 | 74.549466 |
| B7LAQ9 | TY-2482_chromosome | + | 1495421 | 1497046 | 502.0246315 | 423.3549345 | 426.3289701 | 3376.6702   | 2207.594921 | 3191.454971 | -2.692424617 | 30.38958905 | 28.882532 |
| B7LAR0 | TY-2482_chromosome | + | 1497039 | 1498295 | 95.58307204 | 100.7411721 | 109.7663273 | 2659.686327 | 1607.853403 | 2349.5344   | -4.450053695 | 63.15170131 | 61.01087  |
| B7LAR1 | TY-2482_chromosome | + | 1498295 | 1499482 | 74.91278683 | 69.62120522 | 63.14817425 | 1459.704427 | 1091.838680 | 2094.790005 | -4.428193105 | 61.09563522 | 59.004491 |
| B7LAR2 | TY-2482_chromosome | + | 1499679 | 1500578 | 67.91848678 | 81.29954646 | 69.86669225 | 80.89712933 | 105.5847726 | 119.3318898 | -0.4693355   | 1.568365743 | 1.2967658 |
| A7ZP66 | TY-2482_chromosome | - | 1500625 | 1501134 | 90.696905   | 82.35714215 | 69.62369241 | 203.3166072 | 137.2560827 | 190.598236  | -1.161509529 | 6.70338946  | 5.9662501 |
| B7LAR4 | TY-2482_chromosome | - | 1501150 | 1502349 | 822.1927803 | 645.324108  | 669.2746472 | 1320.491881 | 1296.762432 | 1565.267211 | -0.907355751 | 5.360078175 | 4.7106082 |
| B7LAR5 | TY-2482_chromosome | - | 1502452 | 1502991 | 92.83942676 | 85.33335593 | 82.37235846 | 51.89328996 | 50.95487315 | 50.05733015 | 0.765766531  | 3.43999938  | 2.951677  |
| B7LAR6 | TY-2482_chromosome | + | 1503270 | 1503692 | 255.5867127 | 305.3005276 | 269.2774944 | 266.1241048 | 494.5804108 | 203.5135767 | -0.28221239  | 0.387085059 | 0.2937052 |
| Q31YK5 | TY-2482_chromosome | - | 1503737 | 1504357 | 101.6641076 | 117.0465012 | 91.46687552 | 15.90085892 | 26.46259706 | 26.10047338 | 2.174825781  | 16.31921748 | 15.131164 |
| B7LAR8 | TY-2482_chromosome | + | 1504644 | 1505780 | 209.6214036 | 166.31652   | 184.133003  | 74.88192699 | 81.97100722 | 63.46976222 | 1.366633908  | 10.34958719 | 9.4054089 |
| B7LAR9 | TY-2482_chromosome | + | 1505787 | 1506752 | 167.7478071 | 137.5585808 | 141.11976   | 42.78420303 | 48.33586276 | 29.4513483  | 1.87010609   | 16.75687268 | 15.555409 |
| B7LAS0 | TY-2482_chromosome | + | 1506755 | 1508734 | 551.9759829 | 515.6364745 | 520.1868502 | 177.8220468 | 161.8902149 | 219.2759075 | 1.547756938  | 12.04845755 | 11.021569 |
| B7LAS1 | TY-2482_chromosome | + | 1508734 | 1509621 | 212.4720545 | 198.6737478 | 194.6418258 | 78.59519532 | 78.20647019 | 98.33088972 | 1.284073396  | 9.124368489 | 8.2398553 |
| B7LAS2 | TY-2482_chromosome | + | 1509624 | 1511273 | 264.6175917 | 302.9085843 | 266.5962677 | 99.46261268 | 84.59956051 | 80.47820636 | 1.583037326  | 14.83381278 | 13.703384 |
| D6I9J9 | TY-2482_chromosome | + | 1511326 | 1511991 | 328.7725181 | 413.4997809 | 384.9627099 | 231.5748206 | 282.199843  | 240.8919284 | 0.546522365  | 2.259528367 | 1.9016468 |
| B7LAS5 | TY-2482_chromosome | - | 1511991 | 1512254 | 369.2627464 | 461.6347882 | 364.1853847 | 254.3938216 | 427.157462  | 204.6942572 | 0.338393738  | 1.103540791 | 0.8919001 |
| B7LAS6 | TY-2482_chromosome | - | 1512367 | 1513719 | 960.9516504 | 935.5094385 | 986.4398444 | 688.4055371 | 560.4835381 | 694.4755683 | 0.58109982   | 2.430783533 | 2.0551913 |
| B7LAS7 | TY-2482_chromosome | - | 1513719 | 1514678 | 1744.724263 | 1526.482137 | 1873.993666 | 1385.211292 | 1162.049398 | 1341.857698 | 0.449048317  | 1.303707824 | 1.0639875 |
| B7LAS8 | TY-2482_chromosome | - | 1514681 | 1515535 | 2066.270757 | 1909.756399 | 2185.53928  | 2006.401849 | 1660.10962  | 2150.723796 | 0.139799737  | 0.146342981 | 0.1067166 |
| B7LAS9 | TY-2482_chromosome | - | 1515553 | 1516308 | 583.8906143 | 653.8520449 | 648.4144664 | 329.3583472 | 359.4474571 | 412.7957312 | 0.797603188  | 3.828698284 | 3.3016123 |
| B7LAT0 | TY-2482_chromosome | - | 1516308 | 1517975 | 1016.298344 | 933.6209064 | 1088.919488 | 426.656789  | 415.8198402 | 527.1669307 | 1.221692783  | 7.643329051 | 6.8490874 |
| B7LAT1 | TY-2482_chromosome | - | 1518067 | 1519359 | 758.199936  | 813.6972531 | 800.2119519 | 402.309813  | 485.1320782 | 427.6654575 | 0.850775373  | 4.530655259 | 3.9472214 |



|        |                    |   |         |         |             |             |             |             |             |             |              |             |           |
|--------|--------------------|---|---------|---------|-------------|-------------|-------------|-------------|-------------|-------------|--------------|-------------|-----------|
| B7LAT2 | TY-2482_chromosome | - | 1519441 | 1519743 | 2176.990343 | 2091.914103 | 2110.059586 | 1897.879003 | 3094.3591   | 2515.4677   | -0.183861828 | 0.296187931 | 0.2216257 |
| B7LAT3 | TY-2482_chromosome | - | 1519801 | 1520259 | 222.7050642 | 254.269922  | 237.6537461 | 260.1758737 | 253.9148719 | 229.1345305 | -0.103718754 | 0.113151736 | 0.0827057 |
| B7LAT4 | TY-2482_chromosome | + | 1520324 | 1521238 | 213.1231044 | 216.260294  | 207.2224548 | 233.0875935 | 234.7854616 | 236.8162719 | -0.15366292  | 0.336508822 | 0.2530435 |
| B7LAT8 | TY-2482_chromosome | - | 1524344 | 1525798 | 8092.43123  | 7419.120879 | 7846.885956 | 9703.67552  | 5905.111752 | 8886.75802  | -0.069330043 | 0.064753104 | 0.0457895 |
| B7LAT9 | TY-2482_chromosome | - | 1525808 | 1527334 | 7318.269807 | 7668.077222 | 7599.302763 | 10723.64309 | 6018.838584 | 9818.154869 | -0.26323358  | 0.255113413 | 0.1898287 |
| B7LAU0 | TY-2482_chromosome | - | 1527501 | 1529339 | 9045.604503 | 11218.90672 | 10181.46313 | 14095.26066 | 8442.335238 | 12491.59492 | -0.274358285 | 0.210115646 | 0.1555359 |
| B7LAU1 | TY-2482_chromosome | - | 1529339 | 1529638 | 1756.262347 | 2401.775234 | 2307.043396 | 3006.356196 | 1848.104265 | 2790.181571 | -0.30365247  | 0.300036964 | 0.2245699 |
| B7LAU2 | TY-2482_chromosome | - | 1529638 | 1530189 | 3418.008863 | 4616.695845 | 4181.979792 | 5209.155945 | 3297.850657 | 4259.984626 | -0.158590326 | 0.062437469 | 0.0440239 |
| B7LAU3 | TY-2482_chromosome | - | 1530204 | 1530743 | 3470.456216 | 4172.037004 | 4098.190245 | 4625.036603 | 2963.827008 | 4670.057975 | -0.089829882 | 0.061336118 | 0.0433654 |
| B7LAU4 | TY-2482_chromosome | - | 1530761 | 1531735 | 6349.710355 | 7057.522867 | 7253.470898 | 7026.825218 | 4430.841631 | 6450.261581 | -0.179800488 | 0.225143918 | 0.1663635 |
| B7LAU5 | TY-2482_chromosome | - | 1531735 | 1534464 | 21723.89566 | 22113.61912 | 23075.2832  | 16989.16203 | 10972.27651 | 17747.20487 | 0.55915204   | 0.726777985 | 0.5724466 |
| B7LAU6 | TY-2482_chromosome | - | 1534514 | 1535848 | 9699.450976 | 9574.606837 | 9813.078267 | 5440.31477  | 3843.83812  | 6891.736076 | 0.891775423  | 1.482206005 | 1.2199309 |
| B7LAU7 | TY-2482_chromosome | - | 1535848 | 1536345 | 3844.563647 | 3856.431001 | 4131.862991 | 1644.976725 | 1279.34218  | 2171.314967 | 1.274929293  | 3.016989092 | 2.5751274 |
| B7LAU8 | TY-2482_chromosome | - | 1536351 | 1538150 | 9768.863815 | 10627.66444 | 10853.69774 | 4026.320104 | 2860.975027 | 5344.476793 | 1.395823657  | 3.110653603 | 2.6562415 |
| B7LBP8 | TY-2482_chromosome | - | 1538247 | 1538906 | 4480.845096 | 4809.429191 | 5407.60723  | 2131.029296 | 1780.835579 | 2518.936724 | 1.234832654  | 2.896375877 | 2.4682449 |
| B7LBE2 | TY-2482_chromosome | - | 1538925 | 1539365 | 3427.962805 | 3349.666534 | 4052.2018   | 1520.848469 | 1479.699183 | 1721.906318 | 1.256572178  | 3.110315761 | 2.6561745 |
| A1ADD7 | TY-2482_chromosome | - | 1539515 | 1539820 | 1161.306317 | 1287.026669 | 1147.336434 | 315.938176  | 560.9085629 | 318.9119313 | 1.561883824  | 11.58956239 | 10.587273 |
| B7LBE3 | TY-2482_chromosome | - | 1539999 | 1540934 | 545.2697706 | 570.5887257 | 437.9378977 | 466.9520285 | 490.5624721 | 419.9310293 | 0.103392731  | 0.392503534 | 0.2973504 |
| B7LBE4 | TY-2482_chromosome | + | 1541854 | 1543068 | 1212.265413 | 1169.788447 | 1189.712474 | 1459.99903  | 1279.458737 | 1462.868616 | -0.228517166 | 0.600511634 | 0.466988  |
| B7LBE5 | TY-2482_chromosome | + | 1543155 | 1543751 | 376.8338679 | 418.9136246 | 366.9147861 | 278.1757117 | 282.9652603 | 354.8084236 | 0.344871123  | 1.024179848 | 0.8230186 |
| B7LBE6 | TY-2482_chromosome | - | 1543816 | 1545645 | 3087.76336  | 3337.562368 | 3023.069553 | 330.019379  | 278.4327417 | 268.620679  | 3.366687231  | 50.88799004 | 48.976832 |
| B5YXT3 | TY-2482_chromosome | - | 1545735 | 1546382 | 2611.423628 | 2599.248059 | 2655.473848 | 3412.463788 | 3034.051846 | 3319.268615 | -0.313276522 | 0.421961853 | 0.3214447 |
| B7LBE8 | TY-2482_chromosome | - | 1546396 | 1546935 | 2472.287272 | 2473.203654 | 2635.096056 | 3001.943131 | 2785.623215 | 2989.043666 | -0.200667903 | 0.262264283 | 0.1952065 |
| B7LBE9 | TY-2482_chromosome | - | 1547021 | 1547473 | 524.103078  | 561.4598736 | 573.824837  | 434.0421519 | 456.8715015 | 422.4312368 | 0.330524974  | 1.049024647 | 0.8446762 |
| B7LBF0 | TY-2482_chromosome | + | 1547811 | 1549010 | 4245.462423 | 4219.389734 | 4261.140712 | 10979.17285 | 8628.041297 | 12688.62588 | -1.318572346 | 3.188938858 | 2.7274249 |
| B7LBF1 | TY-2482_chromosome | + | 1549088 | 1551229 | 5486.411368 | 4537.056486 | 4572.581799 | 22985.40821 | 17398.18227 | 27798.33208 | -2.169771659 | 6.72755897  | 5.9883336 |
| B7LBF2 | TY-2482_chromosome | + | 1551422 | 1552939 | 257.9026448 | 277.8755034 | 270.0245754 | 66.52692652 | 60.04814093 | 55.46467952 | 2.104552947  | 23.64988312 | 22.262379 |
| B7LBF3 | TY-2482_chromosome | - | 1552978 | 1553517 | 480.6277823 | 553.4636571 | 569.9475816 | 587.3381505 | 515.0456183 | 519.7973358 | -0.046445436 | 0.028361995 | 0.0190323 |
| B7LBF4 | TY-2482_chromosome | - | 1553578 | 1554129 | 528.5842916 | 541.4748431 | 607.6401083 | 633.693289  | 627.0051799 | 652.509058  | -0.165244084 | 0.45592977  | 0.3481561 |
| B7LBF5 | TY-2482_chromosome | - | 1554185 | 1554826 | 130.6568995 | 170.5884447 | 136.4826816 | 164.6002745 | 186.5863822 | 184.1315493 | -0.346708809 | 0.824181982 | 0.6557776 |
| B7LBF6 | TY-2482_chromosome | + | 1554962 | 1555606 | 153.3563652 | 170.8555862 | 122.3237832 | 145.7384041 | 154.7377445 | 140.9006841 | -0.061939675 | 0.005681926 | 0.0033921 |
| B7LBF7 | TY-2482_chromosome | + | 1555666 | 1556025 | 510.5487173 | 622.1347323 | 565.1312108 | 566.4461958 | 614.2612502 | 702.2395799 | -0.156595946 | 0.327209435 | 0.2461591 |
| B7LBF8 | TY-2482_chromosome | + | 1556049 | 1556939 | 952.0370908 | 960.4223731 | 868.6595274 | 1062.431467 | 1087.489418 | 1176.019436 | -0.261940534 | 0.696569866 | 0.5469642 |
| B7LBF9 | TY-2482_chromosome | - | 1556993 | 1557892 | 94.04824591 | 112.4110997 | 102.9739547 | 60.6549077  | 46.31760566 | 56.52352287 | 0.870392572  | 4.551988444 | 3.9670935 |
| B7LBG0 | TY-2482_chromosome | - | 1558092 | 1558862 | 191.2282969 | 225.9880059 | 219.9328682 | 126.787404  | 122.845101  | 121.111675  | 0.750131808  | 4.057421873 | 3.126872  |
| B7LBG1 | TY-2482_chromosome | - | 1558873 | 1559586 | 193.6975497 | 176.2246105 | 202.1645643 | 93.85417326 | 93.7192729  | 97.32429858 | 1.045260489  | 6.462163095 | 5.7413372 |
| B7LBG2 | TY-2482_chromosome | - | 1559586 | 1560269 | 271.5028268 | 230.9281587 | 288.0919182 | 124.5553098 | 148.4045814 | 130.3453996 | 1.035539696  | 5.64404674  | 4.9772546 |
| B7LBG3 | TY-2482_chromosome | - | 1560362 | 1561141 | 1353.757199 | 1149.977384 | 1234.582811 | 1036.895605 | 1133.066013 | 989.5309688 | 0.26809977   | 0.621460517 | 0.4850805 |
| B7LBG4 | TY-2482_chromosome | - | 1561365 | 1562144 | 110.5431537 | 137.2784715 | 107.3645809 | 105.69363   | 107.3865614 | 105.2944216 | 0.085573681  | 0.325133127 | 0.244729  |
| B7LBG5 | TY-2482_chromosome | - | 1562413 | 1562979 | 100.1685379 | 100.6644224 | 103.0121949 | 117.9991983 | 107.2749185 | 156.0131507 | -0.280050369 | 0.899109424 | 0.7181873 |
| B7LBG6 | TY-2482_chromosome | - | 1563077 | 1564591 | 562.489404  | 518.1475841 | 506.9112236 | 1526.213636 | 1294.883719 | 1740.181778 | -1.496886077 | 12.01153008 | 10.987668 |
| B7LBG7 | TY-2482_chromosome | - | 1564631 | 1565116 | 422.230153  | 288.1636458 | 328.6185836 | 824.1923954 | 824.5073876 | 798.6611991 | -1.176752983 | 7.99777625  | 7.1766498 |
| B7LBG8 | TY-2482_chromosome | - | 1565378 | 1566037 | 1013.289387 | 1012.508425 | 1029.97066  | 1144.534429 | 1023.69548  | 1399.346983 | -0.187570923 | 0.537999982 | 0.4155536 |
| B7LBG9 | TY-2482_chromosome | - | 1566030 | 1567295 | 916.8257207 | 912.0640202 | 926.3062143 | 1393.217636 | 1394.106577 | 1920.192848 | -0.715921741 | 3.588513023 | 3.0851104 |
| B7LBH0 | TY-2482_chromosome | - | 1567368 | 1568279 | 2873.971397 | 2669.368784 | 2895.848702 | 6052.285778 | 6455.020804 | 6088.74057  | -1.1144512   | 2.661273465 | 2.2608045 |
| B7LBH1 | TY-2482_chromosome | - | 1568438 | 1569094 | 376.7364496 | 427.0585723 | 416.6510927 | 1215.597592 | 1135.692868 | 1262.884469 | -1.579602704 | 14.44936344 | 13.330347 |
| B7LBH2 | TY-2482_chromosome | - | 1569180 | 1569989 | 491.3024485 | 499.6599867 | 487.8561323 | 1453.359112 | 1253.951094 | 1575.845668 | -1.528832465 | 14.11646699 | 13.004896 |
| B7LBH3 | TY-2482_chromosome | - | 1569992 | 1571002 | 682.8430474 | 624.1275834 | 661.5496868 | 1970.949604 | 1524.186464 | 2146.714599 | -1.486331101 | 11.63114531 | 10.625976 |
| B7LBH4 | TY-2482_chromosome | - | 1571071 | 1572204 | 1049.875873 | 1132.885938 | 1071.497761 | 1433.707339 | 1257.613192 | 1465.462985 | -0.370769164 | 1.092038507 | 0.8821713 |
| B7LBH5 | TY-2482_chromosome | + | 1572303 | 1573295 | 219.8792728 | 206.7342965 | 221.2157105 | 432.6631316 | 436.8005082 | 470.8721817 | -0.106244854 | 6.574301948 | 5.8448859 |
| B7LBH6 | TY-2482_chromosome | - | 1573298 | 1574473 | 131.6031686 | 136.2181998 | 126.6436368 | 182.5763121 | 172.8729863 | 185.4564106 | -0.470668477 | 1.712074559 | 1.4230569 |
| B7LBH7 | TY-2482_chromosome | - | 1574760 | 1575977 | 9556.567338 | 9826.770404 | 9894.952726 | 10104.73986 | 10827.76476 | 12454.61784 | -0.157044599 | 0.200933975 | 0.1482921 |
| B7LBH8 | TY-2482_chromosome | + | 1576136 | 1578139 | 1015.520516 | 1078.712842 | 986.9100055 | 750.1186687 | 633.3068843 | 747.1546458 | 0.505211027  | 2.245780546 | 1.889631  |
| B7LBH9 | TY-2482_chromosome | - | 1578266 | 1578541 | 551.8825773 | 579.0472724 | 526.7065605 | 360.0140893 | 535.2758259 | 419.8182278 | 0.336052136  | 0.946847642 | 0.7579125 |
| B7LBI0 | TY-2482_chromosome | - | 1578578 | 1579123 | 667.8900988 | 611.2114606 | 643.0499396 | 536.1683651 | 668.0435427 | 627.4997261 | 0.114783316  | 0.135792841 | 0.0995931 |
| B7LBI1 | TY-2482_chromosome | - | 1579126 | 1579932 | 587.9574957 | 485.7598992 | 555.2917801 | 489.930759  | 469.5581063 | 489.3997889 | 0.213250742  | 0.397943933 | 0.301842  |
| B7LBI2 | TY-2482_chromosome | - | 1579935 | 1580756 | 818.9599524 | 808.5165471 | 724.692779  | 613.1837331 | 578.7016295 | 762.6126025 | 0.283314942  | 0.712817579 | 0.5606529 |

|                |                    |   |         |         |             |             |             |             |             |             |              |             |           |
|----------------|--------------------|---|---------|---------|-------------|-------------|-------------|-------------|-------------|-------------|--------------|-------------|-----------|
| <b>B7LBI3</b>  | TY-2482_chromosome | - | 1580763 | 1581845 | 1744.684844 | 1667.296058 | 1826.97796  | 1152.956893 | 1008.185454 | 1587.208239 | 0.559116911  | 1.587550642 | 1.3134537 |
| <b>B7LBI4</b>  | TY-2482_chromosome | - | 1581883 | 1582812 | 1271.354013 | 1137.203863 | 1320.624957 | 1407.954853 | 1391.442794 | 1477.362381 | -0.150123877 | 0.475929025 | 0.364112  |
| <b>B7LBI5</b>  | TY-2482_chromosome | + | 1582978 | 1583526 | 675.1111457 | 807.5493289 | 716.2625392 | 228.9372115 | 273.0776481 | 247.3864373 | 1.521021719  | 13.12968403 | 12.050122 |
| <b>B7LF78</b>  | TY-2482_chromosome | - | 1583726 | 1584703 | 524.8467015 | 548.9260696 | 591.0713863 | 596.8691617 | 514.0541385 | 721.798518  | -0.098773562 | 0.287484925 | 0.2148972 |
| <b>B7LBI7</b>  | TY-2482_chromosome | - | 1584933 | 1585802 | 253.48211   | 289.4791052 | 274.7855956 | 135.0775524 | 171.2138329 | 127.9196525 | 0.753012938  | 3.934599763 | 3.997584  |
| <b>B7LBJ2</b>  | TY-2482_chromosome | - | 1588075 | 1590714 | 171.4106293 | 176.4197291 | 126.8903992 | 77.72962226 | 69.14654127 | 63.38455242 | 1.081633353  | 7.382739916 | 6.607623  |
| <b>B7LBJ4</b>  | TY-2482_chromosome | - | 1592037 | 1592519 | 390.3212586 | 379.3172805 | 417.3965753 | 980.9655102 | 1138.545169 | 986.8637411 | -1.363785464 | 10.95010861 | 9.9791828 |
| <b>B7LBJ5</b>  | TY-2482_chromosome | - | 1592725 | 1594866 | 245.7738597 | 320.2100138 | 273.9156547 | 394.9437908 | 357.6371592 | 327.8469322 | -0.454568287 | 1.10771785  | 0.8952199 |
| <b>B7LBJ6</b>  | TY-2482_chromosome | - | 1594869 | 1596176 | 110.5465168 | 139.5912692 | 104.6701547 | 93.47667512 | 51.71565195 | 60.7959881  | 0.630294408  | 3.035077818 | 2.5911053 |
| <b>B7LBJ7</b>  | TY-2482_chromosome | - | 1596359 | 1596640 | 5413.676299 | 5401.080217 | 4783.800139 | 147.5505623 | 355.4120614 | 149.4343297 | 4.568791597  | 23.40829293 | 22.036749 |
| <b>B7LBJ8</b>  | TY-2482_chromosome | + | 1597006 | 1598349 | 2048.396102 | 1904.118817 | 1960.192647 | 1879.534103 | 1613.409327 | 2120.42579  | 0.107180387  | 0.110646171 | 0.0810891 |
| <b>B7LBK0</b>  | TY-2482_chromosome | - | 1599961 | 1600713 | 1241.517471 | 1126.309345 | 1154.012065 | 1436.734703 | 1813.883021 | 1294.977074 | -0.364044123 | 1.086437404 | 0.8778026 |
| <b>B7LBK2</b>  | TY-2482_chromosome | + | 1601007 | 1601936 | 172.5779345 | 183.2481972 | 204.2438201 | 119.0105761 | 115.5924516 | 100.2517458 | 0.731404761  | 3.760328157 | 3.23783   |
| <b>argW</b>    | TY-2482_chromosome | + | 1602015 | 1602089 | 33.77235128 | 47.18248172 | 15.61875224 | 11.72199721 | 40.44326531 | 13.68977186 | 0.362627549  | 0.760998776 | 0.6027124 |
| <b>B7LBK3</b>  | TY-2482_chromosome | + | 1602251 | 1603405 | 136.048305  | 132.0590172 | 147.372375  | 106.0422467 | 91.8935478  | 83.16709928 | 0.549955034  | 2.349522965 | 1.9824334 |
| <b>B7LBK4</b>  | TY-2482_chromosome | + | 1603625 | 1605544 | 807.6008938 | 839.6026627 | 826.5930996 | 497.6621691 | 505.4042975 | 60.80389272 | 1.032565221  | 2.59871193  | 2.2053627 |
| <b>B7LBK5</b>  | TY-2482_chromosome | - | 1605621 | 1607597 | 79.93581943 | 87.14632501 | 81.81308384 | 70.73392784 | 88.59660847 | 14.38379883 | 0.369712618  | 0.862340613 | 0.6872596 |
| <b>A5VVW59</b> | TY-2482_chromosome | + | 1609055 | 1609303 | 496.4959678 | 497.5348195 | 529.6034284 | 106.7875389 | 153.3627127 | 11.90615255 | 2.356062137  | 8.4057078   | 7.5559219 |
| <b>D7X4T9</b>  | TY-2482_chromosome | + | 1609303 | 1609614 | 556.3893229 | 526.2040753 | 571.8409838 | 168.0766383 | 204.2129546 | 34.31946177 | 1.908862793  | 8.073318084 | 7.2458422 |
| <b>C8TUZ6</b>  | TY-2482_chromosome | + | 1609607 | 1610125 | 677.3798129 | 736.6111667 | 762.6931673 | 267.6066846 | 270.5514712 | 55.4028866  | 1.718818792  | 7.414232646 | 6.6357006 |
| <b>B7LTY2</b>  | TY-2482_chromosome | - | 1610146 | 1611990 | 334.0992113 | 390.6498904 | 364.4351752 | 115.9306303 | 139.4950408 | 47.15366156 | 1.721892557  | 11.05672245 | 10.078618 |
| <b>C8TV01</b>  | TY-2482_chromosome | - | 1614616 | 1615461 | 45.64285535 | 44.01017089 | 43.50428204 | 37.2737397  | 43.7307342  | 38.24980245 | 0.165258452  | 0.271069912 | 0.2027889 |
| <b>B7LBL8</b>  | TY-2482_chromosome | - | 1615464 | 1616879 | 68.61915664 | 74.91371912 | 82.74130404 | 76.70275534 | 80.99412949 | 82.83468962 | -0.067162439 | 0.143016459 | 0.1043787 |
| <b>B7LBL9</b>  | TY-2482_chromosome | - | 1616891 | 1617370 | 20.69930088 | 27.69664238 | 27.20649419 | 37.55382811 | 35.49113543 | 31.76637219 | -0.521903713 | 1.005509091 | 0.8072115 |
| <b>B7LBM1</b>  | TY-2482_chromosome | - | 1617576 | 1618844 | 118.9900197 | 129.7688785 | 91.93866272 | 83.85547599 | 101.0893499 | 85.6556114  | 0.264800566  | 0.917114623 | 0.7328588 |
| <b>B7LBM3</b>  | TY-2482_chromosome | - | 1619757 | 1621952 | 37.1951391  | 52.04314987 | 38.76472735 | 17.26890403 | 29.23452992 | 23.68060775 | 0.815237614  | 2.455496966 | 2.0771847 |
| <b>E1U309</b>  | TY-2482_chromosome | - | 1624100 | 1624794 | 205.5917386 | 230.7229762 | 195.2091072 | 77.70614057 | 112.9828965 | 89.58045864 | 1.148805687  | 7.64043105  | 6.8467815 |
| <b>B7LBQ9</b>  | TY-2482_chromosome | + | 1627319 | 1627987 | 34.30135887 | 40.38113651 | 34.89109873 | 44.62955689 | 61.18474502 | 27.03331611 | -0.368222981 | 0.490965076 | 0.3769266 |
| <b>B7LBR1</b>  | TY-2482_chromosome | + | 1628353 | 1628559 | 25.48621572 | 23.48534877 | 23.00610917 | 29.53481422 | 27.25871972 | 31.48115711 | -0.281432496 | 0.473130254 | 0.3620512 |
| <b>B7LBR2</b>  | TY-2482_chromosome | + | 1628559 | 1629185 | 45.94375883 | 81.56064479 | 57.9686619  | 63.45154919 | 56.4471762  | 39.98628865 | 0.022800418  | 0.327921749 | 0.246642  |
| <b>E9U5T6</b>  | TY-2482_chromosome | + | 1629244 | 1629480 | 123.3830822 | 137.7901441 | 108.6151644 | 92.46305866 | 180.8263685 | 13.23640184 | 0.203599838  | 0.417701294 | 0.3183819 |
| <b>B7LBR4</b>  | TY-2482_chromosome | - | 1630329 | 1631573 | 36.4701973  | 43.32444046 | 42.32342095 | 24.34933066 | 26.44557892 | 18.73278157 | 0.760274887  | 2.457312231 | 2.0787725 |
| <b>B7LBR6</b>  | TY-2482_chromosome | + | 1632766 | 1634205 | 161.4570449 | 189.0452666 | 149.5813254 | 79.69509838 | 106.5525349 | 98.60525326 | 0.780629692  | 4.070251745 | 3.5245153 |
| <b>B7LBR7</b>  | TY-2482_chromosome | - | 1634219 | 1635397 | 1259.392662 | 1284.852622 | 1145.280543 | 775.3337281 | 998.4659867 | 752.8391605 | 0.520836465  | 2.046193049 | 1.7119524 |
| <b>E6A6E9</b>  | TY-2482_chromosome | + | 1635442 | 1635657 | 51.4014188  | 70.06753007 | 53.28250273 | 37.42500797 | 34.53817122 | 39.38123342 | 0.570706767  | 1.919879837 | 1.6011929 |
| <b>B7LBR9</b>  | TY-2482_chromosome | + | 1635678 | 1637003 | 249.0096595 | 232.7649666 | 264.2383734 | 258.7002848 | 222.8510138 | 300.8956774 | -0.015077997 | 0.124790752 | 0.0919807 |
| <b>B7LBS2</b>  | TY-2482_chromosome | + | 1640231 | 1640842 | 1306.32754  | 1408.893382 | 1447.334048 | 646.6072652 | 682.691446  | 370.5726304 | 1.216265805  | 8.066901158 | 7.2407026 |
| <b>B7LBS3</b>  | TY-2482_chromosome | + | 1640850 | 1644440 | 1473.023037 | 1791.470027 | 1606.953749 | 1142.473613 | 1078.471307 | 755.805337  | 0.60565101   | 2.920118052 | 2.4884021 |
| <b>B7LBS4</b>  | TY-2482_chromosome | - | 1644502 | 1645644 | 29.83694471 | 28.98963654 | 33.82102002 | 31.44437896 | 19.01648617 | 19.99515731 | 0.358130723  | 0.701327468 | 0.5506462 |
| <b>B7LBS6</b>  | TY-2482_chromosome | - | 1646735 | 1648426 | 29.99288486 | 34.42964237 | 21.33089836 | 45.45591182 | 16.20708715 | 15.10753244 | -0.080079809 | 0.143774016 | 0.1047727 |
| <b>B7LBS7</b>  | TY-2482_chromosome | - | 1648483 | 1649730 | 26.76784737 | 26.64973966 | 34.63907146 | 27.69538635 | 25.46873194 | 23.82542114 | 0.216415364  | 0.272767594 | 0.2038176 |
| <b>B7LCC7</b>  | TY-2482_chromosome | + | 1651171 | 1651443 | 72.33918644 | 109.4343172 | 63.51510898 | 25.28254239 | 20.92170492 | 16.13425095 | 1.763158023  | 11.15250488 | 10.170766 |
| <b>B7LCC8</b>  | TY-2482_chromosome | - | 1651526 | 1651765 | 460.304882  | 649.4056749 | 547.2846621 | 167.5912292 | 277.8233445 | 172.7681792 | 1.356388271  | 8.749727867 | 7.8848703 |
| <b>B7LCD0</b>  | TY-2482_chromosome | + | 1652118 | 1653035 | 1445.74909  | 1268.030408 | 1266.830143 | 1127.064767 | 1491.638348 | 1485.118817 | 0.015635389  | 0.077157844 | 0.0559019 |
| <b>B7LCD1</b>  | TY-2482_chromosome | - | 1653533 | 1654768 | 712.6837733 | 804.5084047 | 608.9726755 | 804.4068987 | 754.3649967 | 899.6386741 | -0.261103643 | 0.536820329 | 0.4146639 |
| <b>E1J8V4</b>  | TY-2482_chromosome | + | 1654888 | 1655193 | 111.0598983 | 76.59282529 | 86.30953115 | 35.25059066 | 39.1311836  | 41.96710538 | 1.315572065  | 6.802939275 | 6.0600476 |
| <b>B7LCD2</b>  | TY-2482_chromosome | + | 1655145 | 1656839 | 923.5496325 | 981.8834955 | 968.0026053 | 961.2424064 | 995.568509  | 1111.482382 | -0.097689911 | 0.328098268 | 0.2466732 |
| <b>B7LCD3</b>  | TY-2482_chromosome | + | 1656857 | 1657588 | 542.8292152 | 571.7879046 | 578.4100658 | 532.888027  | 643.4467431 | 641.88624   | -0.076204775 | 0.207920841 | 0.1535568 |
| <b>B7LCD4</b>  | TY-2482_chromosome | + | 1657604 | 1658458 | 385.2819    | 323.320932  | 362.4804326 | 316.1518211 | 394.1102793 | 378.807756  | 0.04822861   | 0.035873204 | 0.0242166 |
| <b>B7LCD5</b>  | TY-2482_chromosome | - | 1658467 | 1660959 | 113.9385747 | 95.81526753 | 87.48864722 | 185.323065  | 154.6178381 | 186.6839453 | -0.821206402 | 1.317772211 | 3.7521984 |
| <b>B7LCD6</b>  | TY-2482_chromosome | - | 1660987 | 1662021 | 13.94077548 | 21.96675999 | 19.22879524 | 41.85092289 | 31.81494762 | 26.69200271 | -0.984972407 | 2.343441494 | 1.9776051 |
| <b>B7LCD7</b>  | TY-2482_chromosome | - | 1662024 | 1663106 | 33.62678451 | 37.7961562  | 30.83232944 | 38.21748896 | 41.02791067 | 26.76142611 | -0.139024354 | 0.078348092 | 0.0567923 |
| <b>B7LCD8</b>  | TY-2482_chromosome | - | 1663124 | 1664368 | 36.37630511 | 48.08209753 | 46.34370858 | 38.83653236 | 34.54226281 | 36.8604136  | 0.204071649  | 0.450130765 | 0.3436966 |
| <b>B7LCE0</b>  | TY-2482_chromosome | - | 1664938 | 1665900 | 2148.372622 | 2323.412895 | 2445.662191 | 3060.022739 | 2697.375628 | 2435.520332 | -0.279399823 | 0.312709911 | 0.2344032 |
| <b>B7LCE1</b>  | TY-2482_chromosome | + | 1666104 | 1667357 | 215.3940646 | 211.3623592 | 207.8984894 | 192.8767905 | 229.4104698 | 194.8697085 | 0.042872939  | 0.069778351 | 0.0500188 |
| <b>B7LCE2</b>  | TY-2482_chromosome | + | 1667475 | 1667798 | 99.38061044 | 103.1255214 | 105.6843843 | 167.8137022 | 209.3917291 | 184.250711  | -0.848449132 | 4.753804866 | 4.1490723 |
| <b>B7LCE3</b>  | TY-2482_chromosome | - | 1667945 | 1669180 | 417.8898623 | 460.7603413 | 458.9204671 | 197.7970744 | 289.533536  | 242.1092548 | 0.895279526  | 4.473163778 | 3.8958851 |

|               |                    |   |          |         |             |             |             |             |              |             |              |             |            |
|---------------|--------------------|---|----------|---------|-------------|-------------|-------------|-------------|--------------|-------------|--------------|-------------|------------|
| <b>B7LCE4</b> | TY-2482_chromosome | + | 1669516  | 1670715 | 2643.979075 | 2028.633167 | 2086.097682 | 3600.70471  | 3018.491375  | 4536.957582 | -0.649430847 | 1.319585622 | 1.078707   |
| <b>B7LCE5</b> | TY-2482_chromosome | - | 1670771  | 1672957 | 477.0872362 | 481.7631803 | 481.2905323 | 288.7297192 | 319.4410878  | 324.8659202 | 0.64377247   | 2.725023457 | 2.3187734  |
| <b>alaW</b>   | TY-2482_chromosome | - | 1673165  | 1673240 | 1802.879452 | 1085.206123 | 535.3830616 | 530.680862  | 2196.0838    | 268.6571907 | 0.150732492  | 0.16991197  | 0.1253581  |
| <b>alaW</b>   | TY-2482_chromosome | - | 1673280  | 1673355 | 1793.083786 | 1113.389017 | 564.4717639 | 566.1050213 | 2422.69076   | 312.0589994 | 0.032266303  | 0.058584468 | 0.0415055  |
| <b>C8UDX7</b> | TY-2482_chromosome | + | 1673576  | 1673932 | 794.1121149 | 867.4290598 | 804.0759038 | 227.309592  | 289.6365303  | 137.7158235 | 1.830111138  | 14.69654878 | 13.569958  |
| <b>B7LCE7</b> | TY-2482_chromosome | + | 1673937  | 1674326 | 575.0325484 | 592.3914303 | 586.2690523 | 260.8796384 | 304.1346062  | 167.8615763 | 1.19852277   | 7.426460647 | 6.6473568  |
| <b>B7LCE8</b> | TY-2482_chromosome | - | 1674384  | 1675796 | 2804.648861 | 2268.084649 | 2420.301121 | 4120.38118  | 3771.206891  | 4024.455941 | -0.63827622  | 1.202406965 | 0.9758703  |
| <b>valY</b>   | TY-2482_chromosome | + | 1676055  | 1676130 | 457.1458689 | 449.6880358 | 330.2039949 | 186.1586513 | 572.2687107  | 131.5194765 | 0.40843317   | 0.780959321 | 0.6195104  |
| <b>valY</b>   | TY-2482_chromosome | + | 1676175  | 1676250 | 866.1508414 | 889.8781308 | 652.4193185 | 360.1093598 | 1127.387395  | 302.4705303 | 0.367350899  | 0.718169267 | 0.5653287  |
| <b>valY</b>   | TY-2482_chromosome | + | 1676295  | 1676371 | 396.6185658 | 387.6794399 | 268.0513001 | 141.5220536 | 418.3986952  | 114.2774072 | 0.575376818  | 1.292942108 | 1.0542122  |
| <b>valY</b>   | TY-2482_chromosome | + | 1676416  | 1676491 | 542.3699225 | 504.7317297 | 438.0440037 | 441.744753  | 1144.580953  | 343.2045082 | -0.405331944 | 0.654528902 | 0.511983   |
| <b>valY</b>   | TY-2482_chromosome | + | 1676538  | 1676613 | 709.8437868 | 679.7414762 | 589.9210158 | 712.8088294 | 1206.201567  | 531.0939744 | -0.355675257 | 0.669812539 | 0.5243501  |
| <b>lysV</b>   | TY-2482_chromosome | + | 1676618  | 1676691 | 483.9321318 | 451.2079229 | 450.8425357 | 456.3752322 | 594.4881053  | 327.0190056 | -0.022973304 | 0.010997224 | 0.0072702  |
| <b>B7LCE9</b> | TY-2482_chromosome | - | 1676803  | 1677684 | 197.104539  | 251.5260258 | 249.7501895 | 101.8612001 | 127.6089166  | 63.92240741 | 1.170440128  | 7.036908482 | 6.2811954  |
| <b>B7LCF0</b> | TY-2482_chromosome | - | 1677939  | 1679192 | 157.2768272 | 122.6061362 | 137.9257137 | 49.63195697 | 60.1032274   | 57.83700466 | 1.385525495  | 8.856239964 | 8.9332908  |
| <b>B7LCF3</b> | TY-2482_chromosome | - | 1681140  | 1682063 | 163.4002378 | 117.6454321 | 127.8848074 | 66.80570807 | 52.74931673  | 45.11836666 | 1.304178126  | 9.622469597 | 7.763841   |
| <b>B7LCF4</b> | TY-2482_chromosome | + | 1682153  | 1683148 | 820.6019771 | 673.5749207 | 720.2159718 | 806.3241033 | 897.3597285  | 806.5950673 | -0.145345141 | 0.451230151 | 0.3441876  |
| <b>B7LCF5</b> | TY-2482_chromosome | - | 1683151  | 1683366 | 236.1267691 | 277.3407817 | 260.132995  | 292.6718734 | 362.3077886  | 289.6674544 | -0.317520007 | 0.78767145  | 0.6251171  |
| <b>B7LCF6</b> | TY-2482_chromosome | - | 1683371  | 1685383 | 1096.192384 | 1212.724153 | 1171.918545 | 1933.375236 | 1780.903526  | 2079.800818 | -0.742483902 | 3.547836717 | 3.0480583  |
| <b>B7LCF7</b> | TY-2482_chromosome | - | 1685457  | 1686440 | 3310.508311 | 3631.766957 | 3747.618956 | 2795.367359 | 3364.521572  | 3131.159425 | 0.217580189  | 0.241819684 | 0.1796205  |
| <b>B7LCF8</b> | TY-2482_chromosome | + | 1686670  | 1687428 | 281.1484809 | 276.0812712 | 293.2117997 | 211.7646681 | 260.3283833  | 249.8933331 | 0.276013709  | 0.627813382 | 0.4897366  |
| <b>B7LCF9</b> | TY-2482_chromosome | + | 1687616  | 1688584 | 15031.5817  | 14571.69611 | 14692.82363 | 3439.209132 | 3421.773225  | 3579.735601 | 2.096334701  | 6.642309458 | 5.9077598  |
| <b>Q83QP3</b> | TY-2482_chromosome | + | 1688971  | 1689225 | 8764.008572 | 7795.475489 | 8542.812656 | 9705.181887 | 9249.748676  | 9073.900912 | -0.140021279 | 0.167189171 | 0.1229515  |
| <b>B7LCG1</b> | TY-2482_chromosome | + | 1689273  | 1690997 | 25473.69225 | 23808.84878 | 24634.65423 | 31112.71368 | 25188.32567  | 27247.78479 | -0.186660734 | 0.175317116 | 0.1292846  |
| <b>B7LCG2</b> | TY-2482_chromosome | + | 1691041  | 1691547 | 9731.667072 | 9080.447063 | 9612.373998 | 12785.82748 | 13261.31012  | 11538.1833  | -0.399483227 | 0.513100716 | 0.3948348  |
| <b>B7LCG3</b> | TY-2482_chromosome | - | 1691595  | 1692443 | 618.2745752 | 667.3448737 | 727.7984619 | 682.1277237 | 731.678162   | 769.5051322 | -0.088425937 | 0.24935081  | 0.1853625  |
| <b>B7LCG4</b> | TY-2482_chromosome | + | 1692548  | 1692913 | 120.2013216 | 124.4786149 | 152.2273823 | 82.58546454 | 87.35840107  | 91.99504355 | 0.649515462  | 2.538747924 | 2.1503139  |
| <b>B7LCG5</b> | TY-2482_chromosome | - | 1692922  | 1693830 | 920.5130288 | 975.9233929 | 938.8067916 | 324.2620299 | 304.7835985  | 391.673585  | 1.489291963  | 0.217580189 | 0.10953028 |
| <b>B7LCG6</b> | TY-2482_chromosome | - | 1693967  | 1695061 | 4276.077274 | 4466.277226 | 4354.212909 | 182.7632899 | 153.7269311  | 171.0300181 | 4.66665389   | 31.69069574 | 30.168071  |
| <b>B7LCG7</b> | TY-2482_chromosome | - | 1695054  | 1695926 | 2453.50057  | 2924.644025 | 2484.944397 | 106.6668008 | 87.30112622  | 92.19886954 | 4.701150084  | 80.62612282 | 78.112905  |
| <b>B7LCG8</b> | TY-2482_chromosome | - | 1695929  | 1696759 | 2737.837186 | 2771.415355 | 2630.918377 | 104.5860226 | 87.28999134  | 99.95041527 | 4.780403967  | 84.14422462 | 81.526272  |
| <b>B7LCG9</b> | TY-2482_chromosome | - | 1696762  | 1697775 | 3991.255343 | 3940.933408 | 3724.895221 | 161.6222604 | 127.2733676  | 179.8827533 | 4.641055875  | 48.43585964 | 46.575855  |
| <b>B7LCH0</b> | TY-2482_chromosome | - | 1697949  | 1698737 | 2889.607615 | 2862.121384 | 3000.823644 | 5308.017974 | 4278.984676  | 4536.365916 | -0.708072755 | 1.227988001 | 0.9977484  |
| <b>B7LCH1</b> | TY-2482_chromosome | + | 1698869  | 1699723 | 72.27545324 | 34.41997782 | 58.14941798 | 54.20968568 | 40.87847024  | 43.55933222 | 0.354001011  | 0.473858868 | 0.362411   |
| <b>B7LCH2</b> | TY-2482_chromosome | + | 1699887  | 1700780 | 355.8701734 | 380.9704553 | 373.6929305 | 532.9806187 | 410.3330994  | 463.1555584 | -0.377890502 | 0.995777971 | 0.9788303  |
| <b>B7LCH3</b> | TY-2482_chromosome | + | 1700787  | 1702208 | 347.1051477 | 317.3434985 | 316.7949238 | 476.1149923 | 331.1434835  | 356.768359  | -0.287205412 | 0.612883909 | 0.4780642  |
| <b>B7LCH4</b> | TY-2482_chromosome | + | 1702216  | 1703517 | 296.2399818 | 283.3517222 | 262.5663852 | 293.3323873 | 222.8694246  | 242.2079725 | 0.108729348  | 0.328067679 | 0.2466732  |
| <b>D3H2T1</b> | TY-2482_chromosome | - | 1703579  | 1704502 | 3592.455682 | 3853.5144   | 4083.711138 | 1683.90351  | 1511.1529682 | 1712.828047 | 1.237309079  | 3.259861478 | 2.7894443  |
| <b>B7LCH6</b> | TY-2482_chromosome | - | 1704574  | 1705146 | 386.6247734 | 383.9408922 | 382.2327158 | 1313.129701 | 1680.067543  | 1386.819793 | -1.914707556 | 20.78156255 | 19.476325  |
| <b>B7LCH7</b> | TY-2482_chromosome | - | 1705210  | 1705656 | 269.1740473 | 297.7515091 | 252.63786   | 183.2310212 | 178.3518661  | 181.5744171 | 0.548301218  | 2.484573321 | 2.1023783  |
| <b>D3QM21</b> | TY-2482_chromosome | - | 1705646  | 1706179 | 259.2710155 | 328.0643191 | 280.4928223 | 246.8224608 | 255.7232695  | 259.149055  | 0.137369909  | 0.443820671 | 0.3389642  |
| <b>B7LCH9</b> | TY-2482_chromosome | + | 1706282  | 1707148 | 570.4888163 | 648.067313  | 570.9539944 | 684.4454861 | 627.9043598  | 631.5894085 | -0.172877366 | 0.259126536 | 0.1929562  |
| <b>C8UE11</b> | TY-2482_chromosome | + | 1707155  | 1708051 | 342.5332357 | 337.4908463 | 326.7138753 | 398.8364597 | 305.6444071  | 403.6727603 | -0.14381229  | 0.297652569 | 0.2227512  |
| <b>B7LCI1</b> | TY-2482_chromosome | - | 1708063  | 1709112 | 91.96489262 | 90.46141093 | 93.09846412 | 96.7793231  | 65.35750384  | 100.9755413 | 0.076204434  | 0.118711642 | 0.0872437  |
| <b>B7LCI2</b> | TY-2482_chromosome | - | 1709161  | 1709658 | 57.13260187 | 26.87839412 | 55.79760713 | 90.08786413 | 83.70548667  | 81.68821123 | -0.721454122 | 3.15791994  | 2.6983295  |
| <b>B7LCI3</b> | TY-2482_chromosome | - | 1709674  | 1710330 | 46.75227202 | 70.30325536 | 61.47796645 | 125.5703986 | 98.16501508  | 131.3216648 | -1.05396882  | 5.078180766 | 4.4498394  |
| <b>B7LCI4</b> | TY-2482_chromosome | - | 17110343 | 1711227 | 49.9871089  | 64.92121517 | 46.5751815  | 167.0902496 | 121.8108697  | 161.6579334 | -1.576477464 | 10.62170299 | 9.6613274  |
| <b>B7LCI5</b> | TY-2482_chromosome | - | 1711251  | 1712609 | 64.16066043 | 74.13470712 | 70.66108374 | 230.1713769 | 161.8346838  | 223.4525562 | -1.589885849 | 12.13480428 | 11.104868  |
| <b>B7LCI6</b> | TY-2482_chromosome | - | 1712624  | 1714024 | 50.4751564  | 36.97790009 | 33.96355041 | 65.90990857 | 49.0328621   | 63.04489689 | -0.540380045 | 1.525650853 | 1.2575933  |
| <b>B7LCI7</b> | TY-2482_chromosome | - | 1714024  | 1715247 | 51.10859987 | 37.44279457 | 41.45461534 | 44.70008389 | 38.14918021  | 47.21372862 | 0.051715843  | 0           | 0          |
| <b>Q8Z4T7</b> | TY-2482_chromosome | - | 1719006  | 1719690 | 40.52641332 | 25.63297193 | 41.16655    | 46.16967339 | 41.85487429  | 37.07597768 | -0.142155623 | 0.350949497 | 0.2651716  |
| <b>B7LCJ3</b> | TY-2482_chromosome | - | 1719732  | 1720745 | 28.40982652 | 30.44359585 | 26.25590371 | 51.65883999 | 39.07622432  | 37.11303907 | -0.664149096 | 1.533274848 | 1.2638038  |
| <b>B7LCJ8</b> | TY-2482_chromosome | - | 1723341  | 1725617 | 2953.703521 | 3918.009303 | 3102.220566 | 2757.677987 | 2176.699624  | 3033.436068 | 0.254784126  | 0.430260728 | 0.3281816  |
| <b>B7LCJ9</b> | TY-2482_chromosome | + | 1725906  | 1726835 | 1113.280159 | 1290.162139 | 1342.452497 | 2034.434053 | 1634.283099  | 2591.102042 | -0.709023595 | 3.135644436 | 2.6787871  |
| <b>B7LCK0</b> | TY-2482_chromosome | + | 1726876  | 1728876 | 1941.237624 | 2040.350008 | 2217.918851 | 4389.553717 | 3184.974239  | 5476.19225  | -1.026684238 | 2.415894514 | 2.0430053  |
| <b>B7LCK1</b> | TY-2482_chromosome | - | 1728978  | 1730018 | 149.567676  | 139.8744136 | 153.9139833 | 307.9272327 | 330.3822527  | 301.4002407 | -1.061333407 | 7.055012016 | 6.2976693  |
| <b>Q1R8R2</b> | TY-2482_chromosome | + | 1729918  | 1730175 | 66.56112213 | 69.14837451 | 61.89898941 | 112.6215734 | 126.4834243  | 144.4218656 | -0.940905731 | 5.465286156 | 4.80897    |

|        |                    |   |         |         |             |             |              |             |             |             |              |             |           |
|--------|--------------------|---|---------|---------|-------------|-------------|--------------|-------------|-------------|-------------|--------------|-------------|-----------|
| B7LCK2 | TY-2482_chromosome | - | 1730147 | 1730719 | 308.7258501 | 347.0371781 | 323.4641119  | 470.7346155 | 520.5911478 | 476.3486892 | -0.607696635 | 2.394041421 | 2.0222736 |
| B7LCK3 | TY-2482_chromosome | - | 1730790 | 1732766 | 436.5198631 | 474.2880682 | 534.4207773  | 81.78012894 | 59.04165778 | 72.34851199 | 2.752664567  | 34.31116257 | 32.712515 |
| B7LCK4 | TY-2482_chromosome | + | 1732972 | 1734669 | 456.8862622 | 478.7502529 | 450.1803586  | 86.51941779 | 74.64171929 | 53.1873765  | 2.607916203  | 31.7445638  | 30.215552 |
| B7LCK5 | TY-2482_chromosome | + | 1734836 | 1737946 | 235.7118321 | 228.7942118 | 191.7692657  | 178.2546385 | 148.2782947 | 154.0492902 | 0.396520156  | 1.517296939 | 1.2501205 |
| D7Z185 | TY-2482_chromosome | + | 1737953 | 1738246 | 1051.505633 | 1149.790825 | 863.781602   | 1099.844293 | 2787.263511 | 728.817226  | -0.680940897 | 1.197837018 | 0.9724211 |
| B7LCK6 | TY-2482_chromosome | + | 1738488 | 1738841 | 431.2960598 | 481.5808139 | 507.2404798  | 295.2835407 | 319.4201462 | 344.5121309 | 0.588878717  | 2.253409981 | 1.8961034 |
| B7LCK7 | TY-2482_chromosome | + | 1738848 | 1739972 | 1372.948867 | 1432.108097 | 1436.0290989 | 940.859446  | 960.0589244 | 1129.812532 | 0.510065617  | 1.767438018 | 1.4698202 |
| B7LCK8 | TY-2482_chromosome | + | 1740003 | 1740200 | 385.9562496 | 373.5004669 | 350.4079978  | 162.2253906 | 242.176958  | 228.725235  | 0.854384651  | 3.795219415 | 3.2697319 |
| B7LCK9 | TY-2482_chromosome | - | 1740316 | 1741011 | 453.6656534 | 573.0531334 | 522.2537669  | 502.9831113 | 538.786241  | 488.2324913 | -0.031328945 | 0.026656598 | 0.0178128 |
| B7LCL0 | TY-2482_chromosome | - | 1741088 | 1743100 | 1187.58162  | 1141.53535  | 1177.852548  | 1107.898058 | 1033.767095 | 1148.429225 | 0.107431304  | 0.186394312 | 0.1374092 |
| B7LCL1 | TY-2482_chromosome | - | 1743118 | 1743978 | 1111.81176  | 1325.600853 | 1250.508141  | 1094.730173 | 1051.070616 | 1141.865497 | 0.140083779  | 0.377953824 | 0.2866925 |
| B7LCL2 | TY-2482_chromosome | - | 1744128 | 1744523 | 710.9281492 | 902.5797737 | 801.4863397  | 576.7485285 | 546.9363074 | 510.6507325 | 0.492073128  | 2.298155476 | 1.9372262 |
| B7LCL3 | TY-2482_chromosome | - | 1744526 | 1744789 | 445.3205772 | 634.0754779 | 550.65096    | 343.163919  | 303.9511736 | 262.1773834 | 0.370221161  | 3.920291206 | 3.864268  |
| B7LCL4 | TY-2482_chromosome | - | 1744908 | 1745618 | 690.4108951 | 649.0214897 | 576.7411635  | 1277.75076  | 1337.746825 | 1512.70866  | -1.094199148 | 7.306555862 | 6.5342646 |
| Q32D89 | TY-2482_chromosome | + | 1745669 | 1745917 | 507.2612513 | 488.5699056 | 371.1726169  | 900.1045894 | 1056.623313 | 984.0956582 | -1.134817664 | 6.852773647 | 6.1051182 |
| B7LCL5 | TY-2482_chromosome | - | 1745834 | 1746865 | 5679.064415 | 5517.935548 | 5866.912109  | 10458.92216 | 10405.50129 | 11201.0381  | -0.884201749 | 1.728453721 | 1.4377668 |
| B7LCL6 | TY-2482_chromosome | - | 1746885 | 1747760 | 6588.442634 | 6339.711765 | 6813.700792  | 8384.47487  | 7393.179415 | 8681.588475 | -0.28675374  | 0.377000493 | 0.286234  |
| C3T0C3 | TY-2482_chromosome | + | 1747840 | 1748475 | 1563.03291  | 1468.752151 | 1510.581805  | 1321.081724 | 1507.080432 | 1460.299903 | 0.112153036  | 0.166108086 | 0.1222917 |
| B7LCL8 | TY-2482_chromosome | + | 1748478 | 1748945 | 1643.876412 | 1476.634739 | 1501.270611  | 1642.08352  | 2082.278894 | 1895.794567 | -0.242646907 | 0.768371472 | 0.608704  |
| B7LCM0 | TY-2482_chromosome | + | 1749818 | 1751833 | 36.02918381 | 33.44085549 | 28.79226926  | 39.30987354 | 42.7956415  | 39.54224216 | -0.321395254 | 0.633929588 | 0.4946838 |
| B7LCM6 | TY-2482_chromosome | + | 1754916 | 1756493 | 54.9055894  | 39.9001224  | 41.36017006  | 45.42340354 | 38.15559284 | 44.67178308 | 0.120013027  | 0.14145185  | 0.1034206 |
| B7LCM7 | TY-2482_chromosome | + | 1756534 | 1758198 | 76.2899523  | 74.85851951 | 73.88210102  | 70.83495884 | 77.38815528 | 69.84017353 | 0.0439732    | 0.071017639 | 0.0510589 |
| B7LCM9 | TY-2482_chromosome | + | 1758747 | 1759502 | 15.98551751 | 21.67612147 | 36.49891214  | 38.57247416 | 43.70601213 | 42.0954167  | -0.663355537 | 1.946874226 | 1.6249879 |
| B7LCN1 | TY-2482_chromosome | + | 1759941 | 1761950 | 80.75362764 | 66.3194932  | 92.11281836  | 82.78908637 | 84.66063723 | 73.88298827 | 0.045853283  | 4.34E-16    | 0         |
| B7LCN2 | TY-2482_chromosome | + | 1761975 | 1762703 | 63.94853178 | 98.04396508 | 79.18935503  | 53.54909017 | 31.6787605  | 52.36801897 | 0.712036282  | 2.723811192 | 2.318288  |
| B7LCN3 | TY-2482_chromosome | - | 1762863 | 1763921 | 363.3947044 | 375.9713302 | 369.0404915  | 312.2798635 | 375.9032776 | 357.8041089 | 0.098504655  | 0.166414879 | 0.1223879 |
| B7LCN4 | TY-2482_chromosome | + | 1764134 | 1765594 | 782.1747812 | 834.094887  | 779.6409229  | 1903.955421 | 1688.992327 | 1870.756211 | -1.214044558 | 8.040611971 | 7.2163224 |
| B7LCN5 | TY-2482_chromosome | + | 1765618 | 1765974 | 623.0775862 | 622.5744175 | 504.6723212  | 858.1257863 | 1079.454465 | 812.0627952 | -0.695415293 | 2.799536374 | 2.3829805 |
| C8U815 | TY-2482_chromosome | - | 1766118 | 1766861 | 1734.984405 | 1792.324043 | 1633.245638  | 762.0458216 | 990.2275194 | 886.7288543 | 0.971014741  | 5.403674581 | 4.7511906 |
| B7LCN7 | TY-2482_chromosome | - | 1766914 | 1768200 | 964.7934458 | 891.7960623 | 907.750816   | 352.4471223 | 361.2515701 | 418.101546  | 1.327551311  | 9.623062217 | 8.7152041 |
| B7LCN8 | TY-2482_chromosome | - | 1768289 | 1768912 | 2946.770256 | 2332.587271 | 2496.210812  | 1524.168934 | 1592.600395 | 1555.087041 | 0.777241078  | 2.153427278 | 1.8073159 |
| B7LCN9 | TY-2482_chromosome | + | 1769237 | 1770271 | 386.8826765 | 300.4997089 | 341.295015   | 1025.683765 | 849.8333668 | 1303.154984 | -1.5384311   | 12.72212058 | 11.664835 |
| B7LCP0 | TY-2482_chromosome | + | 1770274 | 1770909 | 248.2540674 | 237.6825578 | 260.8969788  | 272.8223374 | 220.0188709 | 443.5373364 | -0.220501054 | 0.765294312 | 0.6063224 |
| B7LCP1 | TY-2482_chromosome | + | 1771083 | 1773146 | 2096.130315 | 2207.152749 | 2106.740085  | 1987.254651 | 1688.940923 | 2224.365775 | 0.12147823   | 0.184114965 | 0.1359614 |
| B7LCP2 | TY-2482_chromosome | + | 1773154 | 1774692 | 1239.08256  | 1293.029694 | 1301.348841  | 1361.304259 | 1245.747303 | 1561.317715 | -0.102832745 | 0.052910226 | 0.1880676 |
| B7LCP3 | TY-2482_chromosome | - | 1774737 | 1776977 | 159.8726284 | 175.0999738 | 182.3554774  | 153.8306241 | 141.0358485 | 136.9692806 | 0.240282994  | 0.725843665 | 0.5719194 |
| B7LCP4 | TY-2482_chromosome | - | 1777197 | 1777484 | 327.0951867 | 308.2094117 | 222.5371552  | 33.39498016 | 73.07024027 | 46.24866894 | 2.481949821  | 21.79175897 | 20.464852 |
| B7LCP6 | TY-2482_chromosome | + | 1778365 | 1778901 | 38.15485734 | 38.50695869 | 35.52810054  | 54.55968267 | 50.93520144 | 52.65497612 | -0.514323252 | 1.374498653 | 1.126941  |
| B7LCP7 | TY-2482_chromosome | - | 1779000 | 1780574 | 8045.348325 | 7321.16502  | 7550.383073  | 15815.04564 | 14781.8623  | 20213.89936 | -1.091686572 | 2.341825828 | 1.9765053 |
| B7LCP8 | TY-2482_chromosome | - | 1780646 | 1782109 | 3176.712539 | 3430.606272 | 3316.33902   | 8172.62939  | 7291.176601 | 11781.81843 | -1.410240504 | 3.627429432 | 3.1185332 |
| B7LCP9 | TY-2482_chromosome | + | 1782271 | 1783638 | 1035.826136 | 948.6496853 | 998.9193801  | 1055.130658 | 1049.225892 | 1292.882195 | -0.134940451 | 0.439925567 | 0.3356744 |
| B7LCQ0 | TY-2482_chromosome | - | 1783641 | 1783853 | 184.0413912 | 153.6040908 | 188.3332384  | 325.6583082 | 308.448918  | 360.2741113 | -0.848486379 | 5.176018828 | 4.5403371 |
| B7LCQ1 | TY-2482_chromosome | - | 1783925 | 1785394 | 1448.519949 | 1447.889282 | 1495.466894  | 3651.426644 | 3182.357631 | 3905.833313 | -1.274147935 | 3.545323644 | 3.0461463 |
| B7LCQ2 | TY-2482_chromosome | - | 1785515 | 1786690 | 4305.443166 | 3638.471005 | 4125.854576  | 9293.956896 | 8680.923638 | 9886.692378 | -1.155919139 | 2.749572091 | 2.3394248 |
| B7LCQ3 | TY-2482_chromosome | - | 1786704 | 1787321 | 1985.63402  | 1729.479742 | 1879.022021  | 4298.970266 | 3662.852436 | 4633.332614 | -1.129417584 | 2.906608797 | 2.476945  |
| B7LCQ4 | TY-2482_chromosome | - | 1787342 | 1788613 | 3416.057734 | 3505.774901 | 3563.977669  | 6423.550189 | 5567.617038 | 6401.685941 | -0.812654488 | 1.528736862 | 1.2599731 |
| B7LDA7 | TY-2482_chromosome | - | 1788727 | 1789842 | 3953.878775 | 3596.772247 | 3918.53938   | 6438.57222  | 6192.878832 | 6297.879892 | -0.700126942 | 1.27706325  | 1.0412911 |
| B7LDA8 | TY-2482_chromosome | - | 1789872 | 1790882 | 3648.934584 | 2907.180922 | 3288.607204  | 3412.834057 | 3566.480785 | 3771.74889  | -0.063338788 | 0.140213498 | 0.1032424 |
| B7LDA9 | TY-2482_chromosome | - | 1791170 | 1792321 | 925.9459167 | 814.9193002 | 866.1892373  | 1815.011436 | 1840.99793  | 2081.0845   | -1.090242797 | 7.407810811 | 6.6304201 |
| D3H3M8 | TY-2482_chromosome | + | 1792438 | 1792962 | 2133.114282 | 1773.067004 | 1736.826484  | 766.5399368 | 1074.892447 | 931.4604166 | 0.175044593  | 5.72252717  | 5.048608  |
| B7LDB1 | TY-2482_chromosome | - | 1793054 | 1795363 | 362.8086519 | 337.7338042 | 325.9944222  | 450.932177  | 514.2152046 | 494.653261  | -0.490729185 | 1.893670484 | 1.5787171 |
| B7LDB2 | TY-2482_chromosome | - | 1795367 | 1800325 | 2921.798702 | 2785.145547 | 3006.124748  | 3432.903908 | 2854.742912 | 3291.609765 | -0.125885316 | 0.153789205 | 0.1124438 |
| C8TVL6 | TY-2482_chromosome | + | 1800532 | 1801374 | 1002.823937 | 1017.427279 | 998.2239165  | 1410.656567 | 1332.274499 | 1435.278672 | -0.472279206 | 1.711183838 | 1.4225363 |
| ryfA   | TY-2482_chromosome | + | 1801567 | 1801871 | 2178.567502 | 2022.357143 | 1961.397328  | 1284.275613 | 3198.486089 | 1241.536343 | -0.117961742 | 0.130870057 | 0.0956002 |
| B7LDB4 | TY-2482_chromosome | - | 1801873 | 1802646 | 1022.990327 | 1086.49968  | 1006.74086   | 2737.916031 | 2352.380279 | 2975.649694 | -1.381692878 | 6.9201764   | 6.1693158 |
| B7LDB5 | TY-2482_chromosome | - | 1802791 | 1804071 | 2965.953183 | 2733.874345 | 3018.680088  | 6848.289212 | 5497.46138  | 8328.591824 | -1.186337033 | 2.952516888 | 2.5174453 |
| B7LDB6 | TY-2482_chromosome | - | 1804252 | 1804449 | 805.4605123 | 813.58536   | 733.9687831  | 1771.58221  | 1975.734584 | 2031.185331 | -1.294385195 | 9.309987019 | 8.4170542 |

|        |                    |   |         |         |             |             |             |             |             |             |              |             |           |
|--------|--------------------|---|---------|---------|-------------|-------------|-------------|-------------|-------------|-------------|--------------|-------------|-----------|
| B7LDB7 | TY-2482_chromosome | - | 1804464 | 1804796 | 1058.19578  | 1017.942412 | 1062.334466 | 2711.419308 | 2701.887759 | 3226.893102 | -1.420292553 | 7.4434918   | 6.6638154 |
| B7LDB8 | TY-2482_chromosome | - | 1804801 | 1806648 | 2574.758966 | 2624.80973  | 2630.370395 | 7446.59862  | 6579.578828 | 8213.10777  | -1.492950779 | 4.118307221 | 3.5685401 |
| B7LDB9 | TY-2482_chromosome | - | 1806668 | 1807180 | 615.5019237 | 582.6713409 | 604.7643261 | 2580.172092 | 2343.287491 | 3017.654709 | -2.100788392 | 22.69709725 | 21.347382 |
| B5Z102 | TY-2482_chromosome | - | 1807279 | 1807605 | 2090.252302 | 1940.326874 | 2063.25168  | 8947.296599 | 8022.038361 | 9067.119868 | -2.074258361 | 7.141489415 | 6.3775663 |
| Q8FF43 | TY-2482_chromosome | + | 1807535 | 1808014 | 2464.851746 | 2396.044948 | 2547.911759 | 12567.23044 | 10503.71426 | 12798.13148 | -2.259495166 | 7.845552205 | 7.0386866 |
| B7LDC2 | TY-2482_chromosome | - | 1808033 | 1809244 | 4375.676661 | 3921.422105 | 4304.115716 | 23984.31375 | 21243.25132 | 25324.0821  | -2.447919558 | 8.365201422 | 7.5187691 |
| B7LDC3 | TY-2482_chromosome | - | 1809359 | 1809844 | 620.6563735 | 641.2550817 | 625.8591955 | 3876.023565 | 3345.249648 | 4191.291373 | -2.592797106 | 13.00703019 | 11.930883 |
| B7LDC4 | TY-2482_chromosome | - | 1810117 | 1810854 | 1774.536522 | 1877.535883 | 1834.112946 | 1623.227705 | 1823.781956 | 1720.853419 | 0.085465095  | 0.173790138 | 0.1281288 |
| B7LDC5 | TY-2482_chromosome | + | 1810973 | 1811773 | 1063.648354 | 953.2545743 | 857.9769648 | 1217.203367 | 1354.13616  | 1561.290095 | -0.488899253 | 1.899096431 | 1.5837499 |
| B7LDC6 | TY-2482_chromosome | + | 1811894 | 1812772 | 33.54402499 | 40.26710736 | 34.22329471 | 38.63125861 | 28.17114122 | 22.78586044 | 0.153627651  | 0.410262697 | 0.3118991 |
| B7LDC7 | TY-2482_chromosome | + | 1812966 | 1814243 | 457.0626819 | 432.6798226 | 389.9291576 | 555.1173569 | 424.8546535 | 573.3436783 | -0.289762256 | 0.747363044 | 0.5909905 |
| B7LDC8 | TY-2482_chromosome | - | 1814241 | 1815377 | 229.1050849 | 201.0642113 | 173.9087262 | 242.0507238 | 263.901077  | 293.1437588 | -0.382937711 | 1.295170327 | 1.0561106 |
| B7LDC9 | TY-2482_chromosome | - | 1815540 | 1816427 | 94.33167368 | 78.59078096 | 91.16183074 | 118.5368446 | 139.2581024 | 144.5508599 | -0.532652784 | 2.473384602 | 2.0923352 |
| B7LDD0 | TY-2482_chromosome | + | 1816563 | 1817921 | 30.64910007 | 37.05224387 | 25.40823161 | 40.25429718 | 23.57882749 | 18.94028378 | -0.012249015 | 0.180855642 | 0.1335518 |
| B7LDD4 | TY-2482_chromosome | + | 1819578 | 1820777 | 76.9896545  | 75.17811074 | 80.61328972 | 50.84444389 | 40.89629729 | 42.23576669 | 0.782617093  | 3.414665487 | 2.9288516 |
| C8UEB1 | TY-2482_chromosome | + | 1820832 | 1821296 | 158.5769624 | 133.0903555 | 169.2575196 | 22.77148276 | 27.30119926 | 26.28395953 | 2.66827239   | 28.37903995 | 26.910026 |
| B7LDD6 | TY-2482_chromosome | - | 1821350 | 1822219 | 45.33470259 | 69.41249908 | 49.98246682 | 65.83923471 | 28.90076202 | 49.95648854 | 0.027122337  | 0.249568475 | 0.1853883 |
| B7LDD7 | TY-2482_chromosome | - | 1822234 | 1823292 | 43.19734433 | 44.5538172  | 55.11686145 | 64.82804441 | 41.72853198 | 53.95456156 | -0.165638272 | 0.272005165 | 0.2033899 |
| B7LDD9 | TY-2482_chromosome | - | 1824384 | 1825892 | 26.55456716 | 10.43553281 | 20.46470265 | 32.22172132 | 19.95255957 | 16.23807746 | -0.18668663  | 0.302308725 | 0.2261619 |
| B7LDE1 | TY-2482_chromosome | - | 1826998 | 1830276 | 42.99802484 | 56.54770775 | 65.7925733  | 73.80248083 | 55.40615482 | 69.64585222 | -0.274301646 | 0.55215614  | 0.4269636 |
| B7LDE2 | TY-2482_chromosome | + | 1830394 | 1831584 | 166.8752993 | 162.0213174 | 142.3367702 | 107.832596  | 98.25548615 | 98.7643709  | 0.594113548  | 2.862511901 | 2.4381894 |
| B7LDE3 | TY-2482_chromosome | - | 1831654 | 1832904 | 6974.591247 | 5655.297166 | 6069.433003 | 14640.15783 | 13995.59137 | 18493.12257 | -1.258637055 | 3.012203934 | 2.5711312 |
| B7LDE4 | TY-2482_chromosome | + | 1833232 | 1834419 | 510.572886  | 589.2554634 | 575.7875889 | 5378.49562  | 5526.741004 | 5561.094076 | -3.311659638 | 16.63524374 | 15.436796 |
| B7LDE5 | TY-2482_chromosome | - | 1834470 | 1834805 | 910.0801496 | 960.2899341 | 884.5805826 | 413.8257131 | 690.0884841 | 433.2629338 | 0.831796831  | 3.788486384 | 3.2633179 |
| B7LDE6 | TY-2482_chromosome | - | 1834869 | 1836200 | 396.6700266 | 302.9745012 | 327.9845065 | 592.1563653 | 583.2775286 | 720.59871   | -0.808253522 | 4.592735982 | 4.0052724 |
| B7LDE7 | TY-2482_chromosome | - | 1836193 | 1836903 | 235.0015338 | 209.0747089 | 198.5018749 | 367.0418183 | 357.6136162 | 391.9388633 | -0.782836371 | 3.97184159  | 3.4330699 |
| B7LDE8 | TY-2482_chromosome | - | 1837071 | 1838495 | 424.7631743 | 407.5678786 | 434.4881997 | 355.8315206 | 436.9651991 | 306.9792508 | 0.202838235  | 0.477656945 | 0.3654704 |
| sroF   | TY-2482_chromosome | - | 1838589 | 1838737 | 10282.90549 | 6305.271299 | 1724.79246  | 892.8407724 | 6079.520497 | 488.4454419 | -1.222922426 | 1.34763268  | 1.1035943 |
| B7LDE9 | TY-2482_chromosome | - | 1839074 | 1842958 | 1702.904241 | 1615.303654 | 1576.513726 | 4824.365462 | 3864.84822  | 5379.16198  | -1.505461238 | 4.462121473 | 3.8855612 |
| B7LDF0 | TY-2482_chromosome | + | 1843354 | 1844769 | 158.6605479 | 149.4453591 | 137.1005487 | 112.7432727 | 136.5885163 | 114.6157933 | 0.28646773   | 0.837488292 | 0.6659821 |
| B7LDF1 | TY-2482_chromosome | - | 1844772 | 1845305 | 548.8723156 | 571.5484993 | 542.6248075 | 166.6129273 | 175.6248833 | 190.604583  | 1.647882758  | 14.57844999 | 13.458117 |
| B7LDF2 | TY-2482_chromosome | - | 1845333 | 1845965 | 978.9288729 | 963.5238054 | 955.9609886 | 446.1577792 | 602.5764509 | 501.3540348 | 0.923319899  | 4.975591773 | 4.3544688 |
| D3H3S1 | TY-2482_chromosome | + | 1846102 | 1847019 | 357.6022445 | 282.7802425 | 356.7014563 | 272.8166564 | 272.1752539 | 193.9464751 | 0.450007883  | 1.350795298 | 1.1062822 |
| B5Z135 | TY-2482_chromosome | + | 1847054 | 1847335 | 50.84784504 | 49.28474845 | 50.83060624 | 19.77740153 | 16.32483054 | 19.68147658 | 1.438307224  | 6.844262324 | 6.0982006 |
| B7LDF6 | TY-2482_chromosome | - | 1848035 | 1848412 | 430.5954622 | 483.7366919 | 469.4513898 | 532.0891514 | 464.9721635 | 511.7541046 | -0.151537355 | 0.273540951 | 0.2044797 |
| B7LDF7 | TY-2482_chromosome | - | 1848415 | 1849143 | 1295.198081 | 1313.842985 | 1345.59137  | 1725.793781 | 1693.570426 | 1852.263107 | -0.400630246 | 1.418572583 | 1.1654264 |
| B7LDF8 | TY-2482_chromosome | - | 1849158 | 1849883 | 495.0750933 | 492.0315488 | 479.9094075 | 725.3949961 | 789.9108869 | 874.6417537 | -0.677716115 | 3.315281455 | 2.8392057 |
| B7LDF9 | TY-2482_chromosome | - | 1849898 | 1850800 | 1191.339552 | 1192.3925   | 1105.721988 | 2096.653275 | 2159.501972 | 2603.240571 | -0.95419261  | 5.632344782 | 4.9673163 |
| B7LDG0 | TY-2482_chromosome | - | 1850800 | 1851477 | 910.0993909 | 858.6273776 | 960.1155746 | 1438.787179 | 1454.244544 | 1528.668985 | -0.659071893 | 3.222167498 | 2.7570586 |
| B7LDG1 | TY-2482_chromosome | - | 1851753 | 1852724 | 2513.547582 | 2418.847838 | 2337.759636 | 3269.452927 | 3842.255298 | 4058.447505 | -0.586170538 | 1.075706162 | 0.8684772 |
| B7LDG2 | TY-2482_chromosome | - | 1852743 | 1854539 | 2319.161918 | 2107.634913 | 2131.135849 | 4995.572029 | 4588.383247 | 5992.218079 | -1.205586215 | 3.136784295 | 2.6796544 |
| B7LDG3 | TY-2482_chromosome | - | 1854740 | 1855216 | 536.4845936 | 398.7480934 | 474.0418196 | 1467.64929  | 1527.061907 | 1569.468322 | -1.622204293 | 16.18643988 | 15.004809 |
| B7LDG4 | TY-2482_chromosome | - | 1855216 | 1856169 | 1707.437346 | 1502.68007  | 1601.035623 | 5773.326508 | 4996.089552 | 6108.18714  | -1.776837346 | 5.890968912 | 5.2038261 |
| B7LDG5 | TY-2482_chromosome | - | 1856172 | 1856819 | 3814.710736 | 3491.473769 | 4108.851921 | 12146.78672 | 11533.04024 | 12577.19156 | -1.62187648  | 4.630893929 | 4.0393628 |
| B7LDG6 | TY-2482_chromosome | - | 1856855 | 1857427 | 3165.498503 | 3343.319279 | 3362.612826 | 5635.978633 | 5837.997793 | 5509.894608 | -0.790917536 | 1.468651486 | 1.2077667 |
| B7LDG7 | TY-2482_chromosome | + | 1857835 | 1859454 | 179.3860909 | 195.3022562 | 184.8163358 | 110.8421571 | 120.1439338 | 117.0938913 | 0.673206181  | 3.333772325 | 2.8548393 |
| B7LDG8 | TY-2482_chromosome | - | 1859445 | 1860179 | 112.2048049 | 101.4037964 | 113.6338955 | 180.1455188 | 125.5908628 | 114.655522  | -0.166831903 | 0.316702435 | 0.3176222 |
| B7LDG9 | TY-2482_chromosome | + | 1860311 | 1861642 | 864.6841379 | 757.9799443 | 750.5101689 | 958.3071293 | 867.9994233 | 1634.136133 | -0.437624719 | 1.760543918 | 1.4646222 |
| B5Z151 | TY-2482_chromosome | - | 1861857 | 1862780 | 127.064712  | 152.6302187 | 113.1950942 | 111.3936774 | 116.4495504 | 137.8432943 | 0.058099738  | 0.187664928 | 0.1383403 |
| B7LDH1 | TY-2482_chromosome | + | 1862838 | 1863422 | 617.8776451 | 587.0151138 | 504.7288118 | 33.06719738 | 30.03787505 | 23.99655743 | 4.228989729  | 62.92903445 | 60.801168 |
| B7LDH2 | TY-2482_chromosome | - | 1863483 | 1863863 | 37065.28425 | 33473.26638 | 33072.33138 | 584.9500473 | 848.4571718 | 425.7552958 | 5.775605064  | 28.27136817 | 26.81068  |
| B7LDH3 | TY-2482_chromosome | + | 1864168 | 1864854 | 935.4660491 | 887.2417471 | 1061.937865 | 578.9081409 | 695.3320852 | 661.7119664 | 0.637417251  | 2.462112731 | 2.082434  |
| B7LDH4 | TY-2482_chromosome | - | 1864908 | 1865942 | 1323.567546 | 1380.748034 | 1431.474102 | 2244.203593 | 1780.846925 | 2287.638944 | -0.607145652 | 2.500095841 | 2.1158311 |
| B7LDH6 | TY-2482_chromosome | - | 1866149 | 1866565 | 184.8301053 | 167.9380824 | 166.911147  | 127.7449422 | 156.5870692 | 146.0146486 | 0.302814498  | 0.767930354 | 0.6086839 |
| D3H3U5 | TY-2482_chromosome | + | 1866586 | 1867332 | 173.0927205 | 123.0548954 | 142.5028169 | 219.6917572 | 236.5815665 | 278.575156  | -0.646079577 | 3.257021592 | 2.7871663 |
| B7LDH8 | TY-2482_chromosome | + | 1867367 | 1870024 | 1915.975437 | 1941.902435 | 1804.925964 | 3304.743367 | 2079.301828 | 2524.806527 | -0.548438213 | 0.791468589 | 0.6285966 |
| B7LDH9 | TY-2482_chromosome | + | 1870141 | 1871493 | 1426.059116 | 1470.810815 | 1479.599955 | 2192.811465 | 2124.947072 | 2189.18405  | -0.575160985 | 1.892393626 | 1.5780185 |

|               |                    |   |         |         |             |             |             |             |             |             |               |             |           |
|---------------|--------------------|---|---------|---------|-------------|-------------|-------------|-------------|-------------|-------------|---------------|-------------|-----------|
| <b>B5Z160</b> | TY-2482_chromosome | + | 1871521 | 1871862 | 778.8597346 | 659.6366828 | 554.7653105 | 236.0723275 | 700.5494682 | 182.7605277 | 0.815301846   | 1.953201607 | 1.6305158 |
| <b>B7LDI1</b> | TY-2482_chromosome | - | 1871865 | 1873160 | 968.7820207 | 832.1829893 | 707.3074027 | 408.8974822 | 1065.402554 | 324.7675111 | 0.460707812   | 0.94077523  | 0.7530146 |
| <b>Q1RFY5</b> | TY-2482_chromosome | + | 1873415 | 1873718 | 4973.57237  | 24311.60394 | 2990.455264 | 17716.73803 | 145291.0188 | 15863.98964 | -3.205946344  | 3.082740756 | 2.6337136 |
| <b>rrfC</b>   | TY-2482_chromosome | - | 1873484 | 1873603 | 3634.473357 | 13522.75686 | 181.8595279 | 14885.56402 | 141842.102  | 5743.031293 | -0.4705008558 | 3.133865124 | 2.6775524 |
| <b>rrfE</b>   | TY-2482_chromosome | - | 1873697 | 1876600 | 609203.2365 | 6227013.784 | 1699509.443 | 1497727.468 | 1266154.331 | 6431116.654 | -0.498325093  | 0.060466432 | 0.0426374 |
| <b>C1HUN0</b> | TY-2482_chromosome | + | 1873922 | 1874278 | 74612.80158 | 768398.5774 | 207061.7237 | 47886.1379  | 30835.71308 | 336148.2498 | 1.035778652   | 1.183482057 | 0.9612525 |
| <b>C1HUN1</b> | TY-2482_chromosome | + | 1874282 | 1874734 | 99139.66984 | 1106833.837 | 265142.467  | 88866.57121 | 50833.18689 | 532582.8863 | 0.755250994   | 0.924109013 | 0.7385422 |
| <b>C1HUN3</b> | TY-2482_chromosome | + | 1874811 | 1875014 | 51123.16566 | 630282.3218 | 155668.9634 | 126851.6975 | 103426.9367 | 612441.3708 | -0.431103573  | 0.004964863 | 0.0027707 |
| <b>Q1R3T8</b> | TY-2482_chromosome | + | 1876072 | 1876374 | 125635.6369 | 1030129.284 | 340746.3043 | 427454.9302 | 367651.3425 | 1694377.165 | -1.050096476  | 0.616534414 | 0.481455  |
| <b>gltV</b>   | TY-2482_chromosome | - | 1876794 | 1876869 | 1422.661461 | 1483.869429 | 867.3283654 | 284.5476802 | 975.5071479 | 200.0173474 | 1.256736955   | 3.769887849 | 3.2458615 |
| <b>rrsD</b>   | TY-2482_chromosome | - | 1877041 | 1878582 | 833689.7174 | 3695767.843 | 1808646.942 | 198145.9638 | 229378.1909 | 747924.2861 | 2.298295063   | 4.417750378 | 3.8461862 |
| <b>Q57H85</b> | TY-2482_chromosome | - | 1877144 | 1877461 | 212646.8639 | 948995.6734 | 431918.4818 | 14144.89361 | 17761.09105 | 87870.14377 | 3.660831578   | 7.539591043 | 6.7549637 |
| <b>E9WNY3</b> | TY-2482_chromosome | + | 1878436 | 1878669 | 92573.83156 | 428036.6297 | 185617.7984 | 36531.78848 | 55623.1457  | 102122.9154 | 1.61664485    | 3.204215713 | 2.7418748 |
| <b>B7LDI2</b> | TY-2482_chromosome | - | 1879029 | 1881599 | 5363.799096 | 4629.066713 | 4095.698977 | 3417.059046 | 3049.524979 | 3317.959503 | 0.515779563   | 0.815885165 | 0.6490205 |
| <b>B7LDI3</b> | TY-2482_chromosome | - | 1881732 | 1882460 | 832.3773163 | 788.7182577 | 815.3727278 | 915.9594546 | 889.9647482 | 1085.06051  | -0.207263615  | 0.700760737 | 0.5503486 |
| <b>B7LDI4</b> | TY-2482_chromosome | - | 1882460 | 1883437 | 1194.211713 | 1254.306911 | 1247.191961 | 1275.912217 | 1182.074867 | 1473.170232 | -0.073036435  | 0.176121222 | 0.1298771 |
| <b>B7LDI5</b> | TY-2482_chromosome | + | 1883572 | 1884306 | 2087.904537 | 2166.145509 | 2129.231193 | 2505.722107 | 2924.020677 | 2994.182002 | -0.378486214  | 0.599889446 | 0.4664952 |
| <b>Q1R8C8</b> | TY-2482_chromosome | - | 1884502 | 1885035 | 19853.61806 | 20912.3612  | 18511.45141 | 12607.80925 | 17885.59043 | 7125.157442 | 0.564098935   | 0.881567397 | 0.7038077 |
| <b>B7LDI8</b> | TY-2482_chromosome | + | 1885171 | 1886328 | 447.086086  | 451.4008553 | 509.2595816 | 513.5623039 | 467.6993812 | 543.1896477 | -0.084746447  | 0.242071943 | 0.1796661 |
| <b>B7LDI9</b> | TY-2482_chromosome | - | 1886377 | 1887495 | 355.8000693 | 411.3109195 | 384.2345024 | 448.2616562 | 513.294915  | 514.3096879 | -0.365636194  | 1.104981437 | 0.8931039 |
| <b>B7LDJ0</b> | TY-2482_chromosome | - | 1887509 | 1888576 | 291.3494951 | 377.2909713 | 349.324752  | 413.5137145 | 403.0770907 | 515.3100866 | -0.396893439  | 1.178730135 | 0.9576103 |
| <b>B7NRQ4</b> | TY-2482_chromosome | + | 1888657 | 1889148 | 116.7777616 | 113.0648798 | 98.08994474 | 32.59381025 | 44.7106273  | 31.82466303 | 1.564307952   | 11.36663722 | 10.372873 |
| <b>B7LDJ2</b> | TY-2482_chromosome | + | 1889301 | 1889816 | 529.4449883 | 596.0606803 | 467.7448313 | 148.5280115 | 207.5752739 | 198.4946209 | 1.505528113   | 11.54591523 | 10.545534 |
| <b>B7LDJ3</b> | TY-2482_chromosome | + | 1889809 | 1891032 | 465.1122386 | 516.5577025 | 430.2047806 | 259.2355582 | 290.3461143 | 269.7590458 | 0.744136817   | 3.873226285 | 3.3426029 |
| <b>B7LDJ4</b> | TY-2482_chromosome | + | 1891051 | 1891530 | 216.1056293 | 243.2434162 | 190.4599673 | 163.2620322 | 190.2400461 | 182.8391158 | 0.234503159   | 0.7264227   | 0.572227  |
| <b>B7LDJ5</b> | TY-2482_chromosome | - | 1891613 | 1891957 | 17219.71938 | 17463.95608 | 16959.38067 | 7562.230793 | 7294.043534 | 7371.430445 | 1.204434769   | 2.611010445 | 2.2148273 |
| <b>B7LDJ6</b> | TY-2482_chromosome | - | 1892002 | 1892766 | 37703.76052 | 37210.62367 | 38973.71496 | 15470.58026 | 12791.56972 | 16381.78014 | 1.368936038   | 2.889722669 | 2.4618466 |
| <b>Q31XD7</b> | TY-2482_chromosome | - | 1892800 | 1893354 | 26956.57194 | 26217.21008 | 28062.70266 | 12682.71119 | 11122.55944 | 13603.22978 | 1.145050048   | 1.8132896   | 1.8132896 |
| <b>B7LDJ8</b> | TY-2482_chromosome | - | 1893367 | 1893612 | 14078.13289 | 13373.94451 | 13209.87571 | 6050.39384  | 5700.512443 | 6352.984166 | 1.178126959   | 2.507602371 | 2.1228764 |
| <b>B7LDJ9</b> | TY-2482_chromosome | - | 1893752 | 1895110 | 3818.503367 | 3586.153218 | 3752.773152 | 4917.042517 | 4216.187747 | 4851.901143 | -0.314178017  | 0.427710195 | 0.3263527 |
| <b>B7LDK0</b> | TY-2482_chromosome | + | 1895202 | 1896065 | 335.1186339 | 304.6457454 | 316.2007506 | 353.1791618 | 354.8871132 | 394.515258  | -0.1710497    | 0.511035286 | 0.3933937 |
| <b>B7LDK1</b> | TY-2482_chromosome | + | 1896179 | 1897372 | 495.8639739 | 491.8088648 | 454.7199238 | 719.5179899 | 799.9475566 | 820.8279246 | -0.69041142   | 3.251730211 | 2.7832763 |
| <b>A1AEE4</b> | TY-2482_chromosome | + | 1897397 | 1898146 | 3559.604332 | 3840.186771 | 3728.9937   | 6198.420967 | 6100.125335 | 4768.24638  | -0.670736441  | 1.008832114 | 0.8100837 |
| <b>B7LDK3</b> | TY-2482_chromosome | + | 1898146 | 1899021 | 765.1065777 | 726.6664966 | 713.6007233 | 645.5634152 | 679.850584  | 590.9359209 | 0.192626872   | 0.508675321 | 0.3913624 |
| <b>B7LDK4</b> | TY-2482_chromosome | + | 1899110 | 1900768 | 782.310664  | 731.9911057 | 736.7407771 | 491.7795186 | 500.5131054 | 524.8552688 | 0.588235457   | 3.253722778 | 1.9864116 |
| <b>B7LDK5</b> | TY-2482_chromosome | + | 1900920 | 1901258 | 1052.238824 | 1091.445079 | 942.5465235 | 654.1556526 | 1152.448469 | 651.7862244 | 0.302501786   | 0.843279073 | 0.6710718 |
| <b>Q5CCH1</b> | TY-2482_chromosome | - | 1901326 | 1901631 | 606.4258623 | 653.6886204 | 604.0073217 | 268.9123281 | 354.1304016 | 286.9691634 | 1.022716974   | 6.284086352 | 5.5736425 |
| <b>B7LDK7</b> | TY-2482_chromosome | - | 1901606 | 1902079 | 1119.537591 | 1059.259013 | 1113.169483 | 519.7378675 | 732.7674281 | 531.8125728 | 0.906503512   | 4.927798811 | 4.3114222 |
| <b>B7LDK8</b> | TY-2482_chromosome | + | 1902211 | 1902690 | 1274.238729 | 1420.813046 | 1233.783383 | 447.9137277 | 597.933386  | 666.5815323 | 1.220816534   | 8.259398578 | 7.4176183 |
| <b>ssrA</b>   | TY-2482_chromosome | + | 1902908 | 1903270 | 422043.0633 | 364736.4543 | 389974.2791 | 187408.7999 | 576372.8788 | 121623.4248 | 0.420460504   | 0.368611926 | 0.2791082 |
| <b>B7LDK9</b> | TY-2482_chromosome | + | 1903476 | 1904714 | 605.803985  | 564.6993    | 584.9379001 | 683.075871  | 651.5812916 | 640.8028375 | -0.166345     | 0.403258775 | 0.3058489 |
| <b>B7LDL0</b> | TY-2482_chromosome | - | 1904859 | 1908602 | 248.8097625 | 260.9634612 | 316.6500737 | 399.5986104 | 367.8281066 | 128.9104423 | -0.21749686   | 0.162827642 | 0.1194321 |
| <b>B7LDL1</b> | TY-2482_chromosome | + | 1909070 | 1912918 | 1935.447143 | 1849.806976 | 1863.784461 | 1907.41312  | 1679.014827 | 1602.643393 | 0.100361935   | 0.252496148 | 0.187764  |
| <b>B7LDL2</b> | TY-2482_chromosome | + | 1912967 | 1913710 | 489.8055595 | 456.9658974 | 527.0486546 | 567.9062117 | 503.282967  | 376.8512251 | -0.001486092  | 0.041916601 | 0.0287268 |
| <b>B7LDL5</b> | TY-2482_chromosome | - | 1914150 | 1915028 | 79.2568381  | 77.59658335 | 79.88939684 | 44.29559154 | 65.93655722 | 2.341260665 | 0.936805477   | 1.867556948 | 1.5567109 |
| <b>B7LDL7</b> | TY-2482_chromosome | + | 1915867 | 1916211 | 46.03857023 | 69.89660643 | 56.071983   | 40.70130917 | 44.64278287 | 35.76195366 | 0.403755308   | 1.262945414 | 1.0289709 |
| <b>C8TWQ4</b> | TY-2482_chromosome | + | 1916334 | 1917077 | 79.20622344 | 93.75450912 | 72.3335876  | 41.1191915  | 48.25501616 | 48.58869201 | 0.786314557   | 3.293798219 | 2.9108333 |
| <b>B7LDM7</b> | TY-2482_chromosome | + | 1923779 | 1924753 | 48.56472903 | 44.76361751 | 53.65228052 | 73.07065765 | 57.23313633 | 72.23321704 | -0.428199486  | 1.29715735  | 1.0577675 |
| <b>B7LDM8</b> | TY-2482_chromosome | + | 1924776 | 1926041 | 152.3717888 | 162.6793986 | 183.8052016 | 250.5444158 | 180.0486015 | 236.6729945 | -0.41596129   | 1.318929168 | 1.0782162 |
| <b>B7LDM9</b> | TY-2482_chromosome | + | 1926067 | 1927512 | 451.4598927 | 545.085405  | 513.0331241 | 1037.193996 | 722.3934133 | 1109.960157 | -0.952142469  | 4.187064601 | 4.1174052 |
| <b>B7LDN0</b> | TY-2482_chromosome | + | 1927529 | 1928806 | 503.7928941 | 629.6852462 | 565.1301824 | 1078.799256 | 640.4436235 | 1070.518291 | -0.770303115  | 2.866041836 | 2.4412135 |
| <b>B7LE81</b> | TY-2482_chromosome | + | 1929120 | 1930517 | 63.56948244 | 57.60483576 | 66.12539952 | 168.4606764 | 117.2461266 | 160.3376825 | -1.22965713   | 7.838146675 | 7.0318906 |
| <b>D3H4S4</b> | TY-2482_chromosome | + | 1930523 | 1931200 | 414.3155039 | 387.1586524 | 421.2963455 | 289.5085494 | 356.8846156 | 246.478911  | 0.457437543   | 1.524858569 | 1.2569773 |
| <b>B7LE82</b> | TY-2482_chromosome | - | 1931207 | 1931653 | 1569.683469 | 1561.207443 | 1598.441222 | 1245.625037 | 1632.819319 | 1066.170811 | 0.249295082   | 0.649689323 | 0.5076716 |
| <b>Q1R837</b> | TY-2482_chromosome | + | 1931725 | 1931907 | 576.3989061 | 641.1611518 | 657.0563729 | 145.3675051 | 431.0489087 | 162.6558586 | 1.360290062   | 5.189045685 | 4.5517158 |
| <b>B7LE84</b> | TY-2482_chromosome | + | 1932078 | 1932374 | 79.36331812 | 81.59429761 | 64.34415175 | 36.63527317 | 43.74689814 | 35.69143117 | 0.90962564    | 4.276773694 | 3.7171087 |
| <b>B7LE85</b> | TY-2482_chromosome | + | 1932387 | 1932908 | 182.5154697 | 175.3976236 | 172.8911613 | 177.6876683 | 234.0194584 | 176.5653412 | -0.144001912  | 0.325110116 | 0.244729  |

|               |                    |   |         |         |             |             |             |             |             |             |              |              |           |
|---------------|--------------------|---|---------|---------|-------------|-------------|-------------|-------------|-------------|-------------|--------------|--------------|-----------|
| <b>B7LE86</b> | TY-2482_chromosome | - | 1932961 | 1933362 | 204.0292291 | 211.5879096 | 231.2554105 | 49.17847259 | 49.12231619 | 52.55858788 | 2.120642569  | 23.62176629  | 22.236579 |
| <b>B7LE87</b> | TY-2482_chromosome | + | 1934030 | 1934476 | 248.3135684 | 225.1037848 | 252.2979815 | 147.1912724 | 245.9542359 | 162.1501024 | 0.435760169  | 1.088569544  | 0.879627  |
| <b>B7LE88</b> | TY-2482_chromosome | - | 1934519 | 1934860 | 153.2830053 | 149.8190047 | 157.1719694 | 185.6731527 | 270.5647184 | 132.3536599 | -0.378841293 | 0.885838099  | 0.7077917 |
| <b>B7LE89</b> | TY-2482_chromosome | + | 1935000 | 1935338 | 1321.722781 | 1922.149585 | 1762.96739  | 1003.486564 | 1508.998488 | 1336.576423 | 0.364625114  | 1.043821691  | 0.8400822 |
| <b>B7LE90</b> | TY-2482_chromosome | + | 1935589 | 1935831 | 7.515535508 | 3.864658693 | 8.045492781 | 27.73531788 | 55.8090113  | 25.53164607 | -2.344959271 | 9.31551981   | 8.4218427 |
| <b>B7LE91</b> | TY-2482_chromosome | + | 1935831 | 1936238 | 14.3207962  | 14.76417513 | 9.576786198 | 48.38844716 | 62.90559753 | 46.30990002 | -2.085356168 | 10.28809802  | 9.3472541 |
| <b>B7LE92</b> | TY-2482_chromosome | + | 1936214 | 1938355 | 93.88394803 | 150.7761773 | 100.0240954 | 268.099426  | 212.8338085 | 274.7533393 | -1.26980467  | 6.330716273  | 5.6163465 |
| <b>B7LE93</b> | TY-2482_chromosome | + | 1938368 | 1939324 | 74.26533407 | 69.08207583 | 53.02175573 | 129.4286905 | 104.5362242 | 143.0870333 | -0.961639961 | 4.828132733  | 4.2176172 |
| <b>Q0TEJ8</b> | TY-2482_chromosome | + | 1939445 | 1939675 | 60.64263442 | 67.91391149 | 46.41116489 | 79.51541541 | 123.2650241 | 26.2149055  | -0.557120348 | 0.56571316   | 0.4378464 |
| <b>B7LE94</b> | TY-2482_chromosome | + | 1939682 | 1940881 | 1698.28882  | 1654.349517 | 1818.421161 | 3741.899219 | 4067.9641   | 3789.051862 | -1.141417375 | 2.961144395  | 2.5247752 |
| <b>B7LE95</b> | TY-2482_chromosome | + | 1940877 | 1941938 | 1591.584251 | 1406.990853 | 1372.430826 | 2325.957954 | 2277.800762 | 2711.196616 | -0.708402805 | 2.338808167  | 1.9739288 |
| <b>B7LE96</b> | TY-2482_chromosome | + | 1941998 | 1942987 | 2624.072815 | 2768.861693 | 2752.531567 | 3545.351441 | 3560.953247 | 4662.032744 | -0.492860533 | 0.848207743  | 0.6754343 |
| <b>B7LE97</b> | TY-2482_chromosome | + | 1943182 | 1944363 | 146.1747868 | 92.98203998 | 128.1573169 | 219.3502923 | 216.5893017 | 214.4990932 | -0.731628737 | 3.980511958  | 3.4410817 |
| <b>B7LE99</b> | TY-2482_chromosome | + | 1944490 | 1945224 | 1560.867604 | 1340.664726 | 1483.562487 | 732.5183282 | 897.3595837 | 881.3440199 | 0.869906831  | 3.960322571  | 3.4231928 |
| <b>B7LE98</b> | TY-2482_chromosome | + | 1945217 | 1945549 | 461.3883971 | 481.2895732 | 446.8514505 | 313.8451038 | 285.673313  | 356.2433665 | 0.540041992  | 2.086167372  | 1.747591  |
| <b>B7LEA0</b> | TY-2482_chromosome | + | 1945643 | 1946170 | 1054.386968 | 1059.013472 | 1116.537598 | 1218.648891 | 1353.264507 | 1360.268602 | -0.255913047 | 0.793591677  | 0.6303105 |
| <b>B7LEA2</b> | TY-2482_chromosome | + | 1946300 | 1947469 | 283.0223301 | 217.7286775 | 223.5835909 | 546.2592023 | 491.3205062 | 665.2548441 | -1.167358324 | 7.757107458  | 6.956299  |
| <b>B7LEA3</b> | TY-2482_chromosome | + | 1947489 | 1949024 | 448.7577043 | 422.8840329 | 428.4309577 | 680.6166407 | 773.5257628 | 899.5021967 | -0.801741494 | 4.453275709  | 3.8780856 |
| <b>B7LEA1</b> | TY-2482_chromosome | - | 1949094 | 1949606 | 2811.097689 | 2710.42186  | 2941.444623 | 4077.376914 | 4603.983442 | 4462.540865 | -0.600133397 | 1.099203468  | 0.8884096 |
| <b>sraD</b>   | TY-2482_chromosome | + | 1949674 | 1949748 | 454.5352411 | 451.7722132 | 545.6969561 | 474.3616328 | 383.029587  | 460.3636724 | 0.169642944  | 0.669722546  | 0.229771  |
| <b>B7LEA4</b> | TY-2482_chromosome | - | 1949759 | 1951312 | 3029.368013 | 3291.565479 | 3235.829524 | 5553.323584 | 4924.212065 | 5755.664469 | -0.772723302 | 1.417466141  | 1.1646607 |
| <b>B7LEA5</b> | TY-2482_chromosome | - | 1951388 | 1951813 | 724.579952  | 709.0957776 | 796.4237071 | 836.0384652 | 806.2846815 | 819.6578924 | -0.121608869 | 0.339130131  | 0.2552033 |
| <b>B7LEA6</b> | TY-2482_chromosome | - | 1951813 | 1952376 | 816.6478    | 735.3917308 | 864.4328168 | 742.0371393 | 773.5596803 | 736.8208159 | 0.142337338  | 0.225062891  | 0.1663635 |
| <b>D7Z1T1</b> | TY-2482_chromosome | - | 1952409 | 1952687 | 457.049948  | 430.2504094 | 399.2187865 | 334.4131565 | 585.5117006 | 295.4001796 | 0.067980439  | 0.131944559  | 0.0964682 |
| <b>argV</b>   | TY-2482_chromosome | - | 1952657 | 1952733 | 424.9339005 | 396.6426657 | 353.5853685 | 329.7961437 | 579.1338639 | 300.6239701 | -0.058150081 | 0.062648235  | 0.0440821 |
| <b>argV</b>   | TY-2482_chromosome | - | 1952797 | 1952873 | 56.72649782 | 68.2680338  | 55.94218622 | 75.72795427 | 134.0988421 | 63.82201984 | -0.663769577 | 1.62084336   | 1.3429738 |
| <b>argV</b>   | TY-2482_chromosome | - | 1952937 | 1953013 | 18.55684406 | 22.67431141 | 21.14535687 | 28.0192531  | 51.31142107 | 12.71662436 | -0.646842207 | 0.914828732  | 0.7308637 |
| <b>argV</b>   | TY-2482_chromosome | - | 1953079 | 1953155 | 288.8474423 | 243.217451  | 257.3988299 | 354.2449346 | 564.5357856 | 298.0185986 | -0.609979919 | 2.081205246  | 1.7430436 |
| <b>argV</b>   | TY-2482_chromosome | - | 1953220 | 1953296 | 131.2006359 | 92.17524395 | 108.8507633 | 210.6344789 | 296.9259615 | 158.5867661 | -0.970155123 | 4.617944581  | 4.0275266 |
| <b>Q83SY0</b> | TY-2482_chromosome | + | 1953359 | 1953726 | 3804.756431 | 3665.498418 | 1816.487036 | 1656.033507 | 4228.751455 | 1277.312213 | 0.248496699  | 0.412143299  | 0.313541  |
| <b>argV</b>   | TY-2482_chromosome | - | 1953360 | 1953436 | 956.6905157 | 875.7844018 | 770.8069855 | 757.9000021 | 1511.159663 | 600.8741751 | -0.169284579 | 0.234013849  | 0.1737286 |
| <b>serV</b>   | TY-2482_chromosome | - | 1953440 | 1953532 | 3771.108281 | 3631.990655 | 1786.76829  | 1608.078164 | 4169.609583 | 1233.911277 | 0.262999893  | 0.43219255   | 0.3298726 |
| <b>B7LEA8</b> | TY-2482_chromosome | - | 1954271 | 1956898 | 11217.54132 | 11179.35102 | 11594.42533 | 20660.01402 | 17249.00569 | 21966.56567 | -0.801143612 | 1.343739755  | 1.1003736 |
| <b>B7LEB0</b> | TY-2482_chromosome | - | 1957029 | 1957526 | 190.7855    | 168.4104302 | 183.5522704 | 198.1246018 | 216.6012864 | 220.9399012 | -0.181813834 | 0.566701835  | 0.4385796 |
| <b>B7LEB1</b> | TY-2482_chromosome | - | 1957772 | 1958830 | 8459.551699 | 8003.813914 | 8702.638816 | 11702.97077 | 10621.16637 | 11166.96443 | -0.398810408 | 0.536690658  | 0.4146603 |
| <b>B7LEA9</b> | TY-2482_chromosome | - | 1958913 | 1959407 | 250.6600004 | 183.0122629 | 263.10718   | 360.910488  | 268.3451423 | 323.6191856 | -0.379034532 | 1.455273577  | 1.1958021 |
| <b>B7LEB2</b> | TY-2482_chromosome | - | 1959555 | 1960637 | 183.1829301 | 192.7859601 | 178.8087404 | 370.9527001 | 332.0684883 | 437.7182107 | -1.033598993 | 6.23963474   | 5.5325971 |
| <b>B7LEB3</b> | TY-2482_chromosome | + | 1960893 | 1961453 | 173.5089628 | 177.4027681 | 162.2541609 | 462.1266077 | 318.3655582 | 413.0289552 | -1.259304689 | 7.697327271  | 6.9013045 |
| <b>B7LEB4</b> | TY-2482_chromosome | + | 1961453 | 1962409 | 242.3261866 | 234.652653  | 233.6569108 | 908.3299913 | 544.9309285 | 724.9351125 | -1.657188318 | 12.15689271  | 11.124913 |
| <b>B7LEB5</b> | TY-2482_chromosome | + | 1962423 | 1962791 | 98.01556934 | 86.10066887 | 98.45289111 | 403.1916228 | 267.4096649 | 321.1122427 | -1.816125911 | 15.08213357  | 13.941302 |
| <b>B7LEB6</b> | TY-2482_chromosome | + | 1962798 | 1963574 | 241.5346432 | 215.2418017 | 265.0062008 | 888.2430623 | 714.3115888 | 763.1698196 | -1.689352104 | 15.22430506  | 14.082155 |
| <b>B7LEB7</b> | TY-2482_chromosome | + | 1963682 | 1964038 | 50.5806805  | 76.97168566 | 53.89493348 | 108.5881195 | 85.44856093 | 102.5585354 | -0.834182724 | 2.775747496  | 2.3619145 |
| <b>B7LEB8</b> | TY-2482_chromosome | + | 1964108 | 1964878 | 511.4058012 | 533.3763352 | 561.3120407 | 583.2599582 | 488.5939454 | 611.5438478 | -0.056742057 | 0.127767574  | 0.0934769 |
| <b>B7LEB9</b> | TY-2482_chromosome | + | 1964874 | 1965836 | 770.2422509 | 770.3663135 | 781.7182979 | 928.8498226 | 727.0134273 | 901.0668511 | -0.143913433 | 0.318343701  | 0.2390102 |
| <b>B7LEC0</b> | TY-2482_chromosome | - | 1965839 | 1967350 | 393.3915133 | 391.4228385 | 368.9286075 | 229.3902137 | 192.8566622 | 215.7511426 | 0.832290032  | 4.549450536  | 3.9649213 |
| <b>B7LEC1</b> | TY-2482_chromosome | + | 1967537 | 1968973 | 30.1792807  | 21.65400894 | 22.22725727 | 37.99410387 | 25.40816823 | 24.00469728 | -0.266502538 | 0.330518951  | 0.2484497 |
| <b>B7LEC2</b> | TY-2482_chromosome | + | 1968973 | 1970103 | 39.06437261 | 33.81085322 | 30.78553989 | 39.06160557 | 36.44025174 | 24.16998892 | -0.001286832 | 0.0507854096 | 0.040973  |
| <b>B7LEC3</b> | TY-2482_chromosome | - | 1970335 | 1972584 | 403.82224   | 396.9677304 | 404.715825  | 151.3925729 | 113.6496501 | 134.2006527 | 1.57717738   | 13.74213341  | 12.645081 |
| <b>B7LEC4</b> | TY-2482_chromosome | - | 1972740 | 1973264 | 17.88263546 | 24.04572964 | 15.56572003 | 34.75813581 | 32.71895549 | 38.02910387 | -0.959987737 | 2.496977863  | 2.1131739 |
| <b>B7LEC5</b> | TY-2482_chromosome | - | 1973416 | 1974426 | 186.7646805 | 225.5202562 | 202.6389917 | 212.0518992 | 200.1532565 | 233.9829514 | -0.098943671 | 0.141915606  | 0.1037428 |
| <b>B7LEC6</b> | TY-2482_chromosome | + | 1974683 | 1976137 | 37.33635001 | 36.56634154 | 40.36573455 | 60.05173088 | 44.49367254 | 53.92731973 | -0.471554383 | 1.227319369  | 0.9972414 |
| <b>B7LEC7</b> | TY-2482_chromosome | + | 1976149 | 1977570 | 115.0988603 | 127.9521865 | 112.0817972 | 118.397309  | 98.20927612 | 111.8045267 | 0.065538934  | 0.220044136  | 0.1627585 |
| <b>B7LF78</b> | TY-2482_chromosome | - | 1977744 | 1978721 | 518.8324912 | 579.175659  | 575.1279101 | 581.748652  | 499.4881543 | 715.1843822 | -0.083080834 | 0.198317616  | 0.1462425 |
| <b>B7LEC9</b> | TY-2482_chromosome | - | 1978969 | 1979451 | 75.63208382 | 81.05222872 | 57.63605095 | 86.92502739 | 77.33595514 | 71.27520519 | -0.232288829 | 0.28877391   | 0.2157905 |
| <b>B7LED0</b> | TY-2482_chromosome | - | 1979459 | 1980229 | 97.62872677 | 123.2214    | 132.3543807 | 145.1261732 | 133.719895  | 153.7889078 | -0.293895113 | 0.832853612  | 0.662734  |
| <b>B7LED1</b> | TY-2482_chromosome | - | 1980257 | 1980724 | 179.4893244 | 156.0799659 | 193.681768  | 146.1845765 | 152.8483061 | 182.5477515 | 0.223660085  | 0.314749897  | 0.2362152 |
| <b>B7LED2</b> | TY-2482_chromosome | - | 1980720 | 1981127 | 69.85614767 | 70.31426804 | 38.84492661 | 59.82838185 | 46.29137432 | 66.78111748 | -0.030849739 | 0.046941406  | 0.0325265 |

|        |                    |   |         |         |             |              |             |             |             |             |              |             |            |
|--------|--------------------|---|---------|---------|-------------|--------------|-------------|-------------|-------------|-------------|--------------|-------------|------------|
| D3GRQ1 | TY-2482_chromosome | - | 1981127 | 1981891 | 50.36803658 | 41.62187545  | 36.63769513 | 50.24274449 | 33.54330599 | 45.95451331 | -0.02874205  | 0           | 0          |
| B7LED5 | TY-2482_chromosome | - | 1982446 | 1984152 | 59.86059262 | 59.19155013  | 55.32420418 | 96.08213277 | 61.6900191  | 107.3979929 | -0.600196513 | 1.912494951 | 1.595572   |
| B7LED7 | TY-2482_chromosome | - | 1985099 | 1986922 | 69.6118041  | 78.16314011  | 53.66661428 | 64.61825737 | 52.72428461 | 55.3653927  | 0.118717099  | 0.396010734 | 0.3002648  |
| B5Z389 | TY-2482_chromosome | + | 1988315 | 1988674 | 320.2761987 | 291.1471152  | 258.484805  | 37.70483107 | 29.05493864 | 31.66780876 | 3.104396332  | 40.6524347  | 38.917368  |
| B7LEE1 | TY-2482_chromosome | + | 1988681 | 1989550 | 1534.766724 | 1225.252443  | 1422.1755   | 166.1876934 | 120.8567091 | 200.7113284 | 3.179571841  | 40.86007244 | 39.109212  |
| B7LEE2 | TY-2482_chromosome | + | 1989544 | 1989813 | 451.8122369 | 407.6231722  | 413.2036636 | 52.06299137 | 32.58337723 | 58.75446821 | 3.176537598  | 39.57135603 | 37.85153   |
| B7LEE3 | TY-2482_chromosome | + | 1989816 | 1990934 | 1093.349471 | 1081.931781  | 1060.259508 | 207.7608594 | 145.4395896 | 216.7406584 | 2.50525053   | 28.18232257 | 26.729803  |
| B7LEE4 | TY-2482_chromosome | + | 1990976 | 1991941 | 582.6343366 | 506.2288238  | 588.3908468 | 181.2017464 | 171.9495461 | 195.8744039 | 1.664947867  | 13.89785942 | 12.793446  |
| B7LEE5 | TY-2482_chromosome | + | 1992018 | 1994093 | 240.7069738 | 274.4964319  | 236.1833686 | 329.5068097 | 319.3623533 | 391.732981  | -0.486603742 | 1.62703434  | 1.3486232  |
| B7LEE6 | TY-2482_chromosome | - | 1994136 | 1994486 | 48.45581875 | 51.81551045  | 57.62889232 | 478.49568   | 655.4356291 | 425.4372718 | -3.301335222 | 38.56780401 | 36.862701  |
| B7LEE7 | TY-2482_chromosome | + | 1994773 | 1997331 | 774.98351   | 589.420372   | 725.6878257 | 1486.631008 | 1283.935942 | 1959.605616 | -1.066350524 | 6.803015868 | 6.0600476  |
| B7LEE9 | TY-2482_chromosome | - | 1998150 | 1998944 | 269.0759456 | 298.3963865  | 292.5154912 | 261.1843841 | 292.1588909 | 278.92253   | 0.042992232  | 0.085175397 | 0.0623272  |
| B7LEF0 | TY-2482_chromosome | + | 1999110 | 2000015 | 97.26882667 | 92.96112891  | 91.01056085 | 157.8959726 | 139.2174171 | 127.8765347 | -0.6265813   | 2.522999354 | 2.1361915  |
| B7LEF1 | TY-2482_chromosome | + | 2000015 | 2001274 | 142.895959  | 122.4442403  | 145.3799529 | 204.9454239 | 165.5023257 | 228.5687422 | -0.482561272 | 2.025662319 | 1.6936756  |
| B7LEF2 | TY-2482_chromosome | + | 2001274 | 2001909 | 72.61629143 | 58.32164912  | 74.10229024 | 108.1009102 | 67.16225538 | 103.6915977 | -0.394504315 | 1.205716928 | 0.9785386  |
| B7LEF3 | TY-2482_chromosome | + | 2001917 | 2002690 | 117.0631233 | 79.27629812  | 90.26888528 | 114.4574857 | 89.98929477 | 113.0087464 | -0.090662966 | 0.283271109 | 0.2116364  |
| B7LEF4 | TY-2482_chromosome | + | 2002782 | 2004143 | 65.96092355 | 57.2651568   | 56.61886267 | 58.90527117 | 57.43211378 | 28.40319947 | 0.241473627  | 0.62477647  | 0.4875578  |
| B7LEF6 | TY-2482_chromosome | - | 2004436 | 2005860 | 30.10895532 | 25.93415772  | 22.15426674 | 39.22263619 | 25.2690231  | 63.46781366 | -0.642485165 | 1.584547273 | 1.31074    |
| C8TFY8 | TY-2482_chromosome | + | 2006600 | 2007004 | 107.5768003 | 132.1061023  | 101.3863222 | 54.77926071 | 73.79615459 | 65.77132815 | 0.764034109  | 3.712359761 | 3.1941502  |
| B7LEF8 | TY-2482_chromosome | - | 2007131 | 2008120 | 1997.087803 | 2854.184242  | 2406.513264 | 9976.016554 | 7407.686666 | 9228.952728 | -1.969240338 | 5.637192687 | 4.9712833  |
| B7LEG0 | TY-2482_chromosome | - | 2008186 | 2009322 | 2039.634748 | 3162.714459  | 2582.136993 | 8779.218082 | 7860.968088 | 8558.048854 | -1.795697684 | 4.801029382 | 4.1924501  |
| B7LEG1 | TY-2482_chromosome | - | 2009465 | 2010088 | 1103.614659 | 1335.448491  | 1167.183582 | 1356.19142  | 1220.31372  | 1383.920791 | -0.18278201  | 0.291488648 | 0.217942   |
| B7LEG2 | TY-2482_chromosome | - | 2010085 | 2010843 | 1399.229217 | 1362.827374  | 1353.413724 | 1884.232001 | 1637.10028  | 1923.290623 | -0.400342362 | 1.353086378 | 1.1082127  |
| B7LEG3 | TY-2482_chromosome | - | 2010827 | 2011873 | 1512.916648 | 1453.073672  | 1452.447659 | 2187.514608 | 1881.870683 | 2516.388093 | -0.549400758 | 1.731221985 | 1.43399772 |
| B7LEG4 | TY-2482_chromosome | - | 2011873 | 2012349 | 530.3577585 | 489.6420405  | 460.6260152 | 906.1716199 | 777.9628916 | 1112.497282 | -0.886212779 | 4.860296822 | 4.247056   |
| B7LEG5 | TY-2482_chromosome | - | 2012352 | 2013059 | 534.6422779 | 533.6076996  | 567.2303837 | 1066.418567 | 932.6840109 | 1284.897541 | -0.963874678 | 6.2135941   | 5.5079735  |
| B7LEG6 | TY-2482_chromosome | - | 2013081 | 2013389 | 488.989053  | 525.1352165  | 508.3584962 | 599.3875532 | 709.920805  | 604.0342095 | -0.340811606 | 0.958034188 | 0.7669002  |
| B7LEG7 | TY-2482_chromosome | - | 2013586 | 2013906 | 166.4775597 | 229.5495957  | 184.72479   | 50.06093125 | 64.61989306 | 75.89400263 | 1.585915829  | 12.30282006 | 11.262568  |
| B7LEG8 | TY-2482_chromosome | - | 2013959 | 2014561 | 868.680823  | 1144.464043  | 1004.18631  | 62.10825161 | 50.01193141 | 46.32389116 | 4.147295113  | 65.29731934 | 63.129335  |
| B7LEG9 | TY-2482_chromosome | - | 2014564 | 2015988 | 3695.776974 | 3814.614877  | 3689.989951 | 233.6424412 | 184.6888022 | 171.3741835 | 4.187138197  | 44.06841061 | 42.284126  |
| B7LEH0 | TY-2482_chromosome | - | 2015993 | 2016898 | 2311.596574 | 2233.538866  | 2242.763477 | 111.3937654 | 82.71975362 | 92.20066343 | 4.538839662  | 76.94829385 | 74.567702  |
| B7LEH1 | TY-2482_chromosome | + | 2017150 | 2018184 | 169.5283394 | 222.0788563  | 179.410617  | 278.6835665 | 256.630419  | 230.5054324 | -0.52633709  | 1.410933491 | 1.1593186  |
| B7LEH2 | TY-2482_chromosome | - | 2018458 | 2018748 | 29.8280107  | 37.23628102  | 28.17307198 | 29.39050037 | 24.45459227 | 41.55473413 | -0.023950422 | 0           | 0          |
| B7LEH3 | TY-2482_chromosome | - | 2018751 | 2019668 | 56.02439833 | 45.8074235   | 68.43150555 | 96.19562566 | 100.0393737 | 133.6874271 | -0.818006432 | 4.37825397  | 3.8098714  |
| B7LEH4 | TY-2482_chromosome | - | 2019668 | 2020453 | 74.16329959 | 704.01270987 | 58.38666762 | 91.2460162  | 96.24640162 | 169.2629758 | -1.08276085  | 4.947054732 | 4.3283114  |
| B7LEH6 | TY-2482_chromosome | - | 2021057 | 2022109 | 88.18582714 | 92.56381261  | 89.75586828 | 243.7136397 | 167.2416393 | 296.6683011 | -1.366804512 | 8.68901423  | 7.8276282  |
| B7LEH7 | TY-2482_chromosome | - | 2022124 | 2022657 | 42.58311368 | 37.36500981  | 48.43596202 | 103.7108686 | 76.2634783  | 134.8326585 | -1.197425759 | 6.560938688 | 5.8330509  |
| B7LEH8 | TY-2482_chromosome | - | 2022657 | 2024285 | 90.79635259 | 77.38767372  | 63.59602113 | 169.3893337 | 136.3616923 | 207.3452221 | -1.127969967 | 6.523907786 | 5.7990606  |
| B7LEH9 | TY-2482_chromosome | - | 2024317 | 2027015 | 131.4421482 | 141.8922947  | 155.3623713 | 211.1620499 | 160.9772143 | 185.5344376 | -0.393584986 | 1.222813814 | 0.9937045  |
| P11901 | TY-2482_chromosome | - | 2027370 | 2028479 | 228.8239963 | 246.4035313  | 210.3737511 | 163.9116395 | 214.9083047 | 160.7917647 | 0.307531777  | 1.001223805 | 0.8033767  |
| B7LEI1 | TY-2482_chromosome | - | 2028976 | 2029707 | 1876.216172 | 1850.308532  | 2146.683293 | 95.34716374 | 82.75430962 | 92.06930505 | 4.464516172  | 74.57375828 | 72.294624  |
| B7LEI2 | TY-2482_chromosome | - | 2029784 | 2031493 | 4937.257382 | 4724.493732  | 4848.743613 | 198.7186568 | 136.3546286 | 184.0534681 | 4.7974766    | 30.04753484 | 28.543525  |
| B7LEI3 | TY-2482_chromosome | - | 2031496 | 2033292 | 3577.049207 | 3261.438764  | 3184.807331 | 142.2064294 | 92.64926694 | 139.1975542 | 4.741426019  | 77.81218948 | 75.383293  |
| B7LEI4 | TY-2482_chromosome | + | 2033608 | 2033970 | 128.2167981 | 94.300796    | 101.4827335 | 101.5890307 | 127.5182617 | 97.62212546 | 0.030077579  | 0.007413236 | 0.0047406  |
| B7LEI5 | TY-2482_chromosome | + | 2034051 | 2035319 | 332.0522386 | 342.1190055  | 307.474241  | 417.6094746 | 304.7733366 | 313.3819129 | -0.150127697 | 0.149421187 | 0.1087511  |
| B7LEI6 | TY-2482_chromosome | + | 2035313 | 2035570 | 57.06158117 | 36.02366917  | 53.62550115 | 82.68540572 | 61.83538404 | 53.06000053 | -0.392580507 | 1.028557594 | 0.8269425  |
| B7LEI8 | TY-2482_chromosome | + | 2035590 | 2036162 | 76.88588687 | 89.37402568  | 81.82493884 | 120.8070365 | 87.29186635 | 81.94215643 | -0.318218136 | 0.557405742 | 0.4311964  |
| B7LEI7 | TY-2482_chromosome | - | 2036316 | 2037173 | 38.01753951 | 51.76484815  | 34.65788877 | 41.06728544 | 29.95270111 | 33.00906711 | 0.12036813   | 0.390526652 | 0.2958471  |
| B7LEI9 | TY-2482_chromosome | - | 2037173 | 2037949 | 18.7008255  | 25.83706018  | 12.72333377 | 42.49189992 | 34.57554765 | 25.46379481 | -1.046540349 | 2.137948419 | 1.7935216  |
| B7LEJ0 | TY-2482_chromosome | - | 2037930 | 2039264 | 18.69155493 | 20.17988438  | 17.01850984 | 47.67072949 | 36.34377215 | 35.74801703 | -1.171255704 | 3.766889172 | 3.2433121  |
| B7LEJ1 | TY-2482_chromosome | - | 2039361 | 2040812 | 34.485253   | 27.10316257  | 33.74089296 | 77.49117707 | 47.18472605 | 56.73365706 | -0.923175019 | 3.321674606 | 2.8450289  |
| B7LEJ3 | TY-2482_chromosome | + | 2041986 | 2043260 | 101.3972478 | 156.1799649  | 105.3013492 | 58.78700623 | 83.88071023 | 58.18926851 | 0.724713442  | 3.508767375 | 3.014072   |
| B7LEJ4 | TY-2482_chromosome | + | 2043290 | 2044765 | 121.1265546 | 144.6749255  | 100.5538198 | 97.34582205 | 63.6125751  | 58.34712242 | 0.572510719  | 2.827747146 | 2.4066986  |
| E7JX4  | TY-2482_chromosome | + | 2045408 | 2045986 | 97.85332479 | 123.9933547  | 89.4353275  | 50.43359205 | 126.9669268 | 48.12123431 | 0.382168516  | 0.941547501 | 0.7363403  |
| B7LEJ5 | TY-2482_chromosome | - | 2046327 | 2046995 | 822.400654  | 1000.736207  | 903.1566277 | 674.1623407 | 832.7847135 | 721.0611768 | 0.260051048  | 0.848220136 | 0.6754343  |
| Q8FEG8 | TY-2482_chromosome | + | 2048175 | 2049401 | 35950.90424 | 33002.23109  | 35903.62458 | 58362.63891 | 53922.33263 | 57021.37623 | -0.670389818 | 0.996310938 | 0.7992135  |
| B7LEK0 | TY-2482_chromosome | - | 2049609 | 2051243 | 10548.35663 | 9770.581721  | 9840.049341 | 10671.21045 | 8694.504861 | 11602.08566 | -0.01618501  | 0.03487487  | 0.0237391  |



|               |                    |   |         |         |             |             |             |             |             |             |              |             |           |
|---------------|--------------------|---|---------|---------|-------------|-------------|-------------|-------------|-------------|-------------|--------------|-------------|-----------|
| <b>B7LEK1</b> | TY-2482_chromosome | - | 2051474 | 2052262 | 670.5497682 | 792.8429664 | 807.6364622 | 1060.554342 | 995.5349524 | 1157.545959 | -0.502050622 | 2.006010482 | 1.6766725 |
| <b>B7LEJ9</b> | TY-2482_chromosome | - | 2052336 | 2052668 | 333.2585273 | 403.7403029 | 405.5450317 | 415.0803318 | 373.0518105 | 432.6949423 | -0.110157927 | 0.191777739 | 0.1414927 |
| <b>Q1R7R0</b> | TY-2482_chromosome | + | 2052585 | 2052944 | 454.5312069 | 499.4586421 | 502.5126369 | 501.854806  | 427.6380379 | 505.0719446 | 0.011824468  | 0.036951256 | 0.0250864 |
| <b>B7LEK2</b> | TY-2482_chromosome | - | 2052997 | 2055228 | 2782.514847 | 3188.243928 | 3103.152725 | 4682.201139 | 3276.026359 | 4349.282344 | -0.477352875 | 0.638073971 | 0.4980312 |
| <b>B7LEK4</b> | TY-2482_chromosome | - | 2055279 | 2056567 | 813.321145  | 1052.198283 | 991.1059996 | 1322.169547 | 1097.429555 | 1287.898164 | -0.423951651 | 1.134559753 | 0.9191027 |
| <b>C8UAB8</b> | TY-2482_chromosome | + | 2056634 | 2059387 | 859.2493166 | 832.5150232 | 881.4656332 | 669.2701819 | 624.2596431 | 651.2435894 | 0.413203994  | 1.424081597 | 1.1705944 |
| <b>B7LEW6</b> | TY-2482_chromosome | - | 2059625 | 2060962 | 145.0992098 | 141.8423084 | 139.8972834 | 164.1057584 | 164.7020597 | 172.2931794 | -0.223973132 | 0.620231358 | 0.4841118 |
| <b>C8TG35</b> | TY-2482_chromosome | - | 2060986 | 2062323 | 123.5336475 | 108.8415645 | 109.4657775 | 70.84834521 | 62.70368891 | 83.86856929 | 0.691280833  | 2.900441157 | 2.4717998 |
| <b>B7LEW9</b> | TY-2482_chromosome | - | 2062328 | 2063677 | 113.3836007 | 81.12283194 | 76.84239812 | 82.3563248  | 59.94101459 | 78.81048086 | 0.313891328  | 0.720354833 | 0.5673789 |
| <b>B7LEX0</b> | TY-2482_chromosome | - | 2064115 | 2064561 | 922.2214956 | 786.8831991 | 870.856828  | 954.7832238 | 999.2465933 | 977.5273282 | -0.144045534 | 0.473251877 | 0.3620512 |
| <b>B7LEX1</b> | TY-2482_chromosome | - | 2064582 | 2065361 | 211.085512  | 171.3741711 | 189.4356336 | 214.8782857 | 196.5391222 | 198.7426406 | -0.0664339   | 0.174473835 | 0.1285471 |
| <b>B7LEW7</b> | TY-2482_chromosome | - | 2065364 | 2065690 | 110.0312742 | 98.55427004 | 101.5994657 | 103.1255917 | 95.51018486 | 105.1851762 | 0.048973154  | 0.054043181 | 0.0382319 |
| <b>csrB</b>   | TY-2482_chromosome | - | 2065733 | 2066092 | 13504.48284 | 26776.81217 | 22306.21432 | 17720.84549 | 17120.71231 | 22478.12193 | 0.046915161  | 0.115377588 | 0.0845231 |
| <b>B7LEX3</b> | TY-2482_chromosome | - | 2066315 | 2066857 | 563.8760498 | 564.0687444 | 543.2741918 | 136.2240617 | 158.3491707 | 176.0089243 | 1.860547295  | 17.28500668 | 16.071265 |
| <b>B7LEX4</b> | TY-2482_chromosome | + | 2066925 | 2067770 | 667.1158817 | 641.635987  | 634.3978541 | 1035.881711 | 907.2757327 | 921.0519999 | -0.577516105 | 2.418126795 | 2.0443385 |
| <b>B7LEX5</b> | TY-2482_chromosome | + | 2067885 | 2069246 | 5108.424285 | 5326.607911 | 5194.030405 | 12519.15391 | 11049.75245 | 13754.48389 | -1.25139194  | 2.855003526 | 2.431691  |
| <b>B7LEX2</b> | TY-2482_chromosome | + | 2069806 | 2071092 | 3565.888529 | 3025.088106 | 3169.682989 | 1681.239859 | 1388.610297 | 1890.165201 | 1.021559203  | 2.232403908 | 1.8785777 |
| <b>B7LEX7</b> | TY-2482_chromosome | + | 2071153 | 2072517 | 1822.583023 | 1616.037988 | 1744.339976 | 807.8474114 | 608.6546884 | 925.7040832 | 1.19394493   | 6.991775691 | 6.2382259 |
| <b>C8UAD0</b> | TY-2482_chromosome | + | 2072542 | 2073384 | 237.9904691 | 211.6681396 | 201.8097442 | 141.4322906 | 131.05185   | 113.450277  | 0.72725526   | 3.741520427 | 3.2207932 |
| <b>B7LEX9</b> | TY-2482_chromosome | - | 2073445 | 2074593 | 80.63990905 | 96.60835765 | 81.04944015 | 175.3772346 | 110.8805892 | 131.7230105 | -0.796997992 | 2.857351343 | 2.4335342 |
| <b>B7LEX8</b> | TY-2482_chromosome | - | 2074621 | 2075265 | 20.12414833 | 20.79728298 | 21.83348538 | 58.09819346 | 46.35458705 | 47.51718799 | -1.29895038  | 5.613414099 | 4.9501421 |
| <b>B7LEY1</b> | TY-2482_chromosome | + | 2075812 | 2077125 | 73.51131802 | 60.08985911 | 59.87832921 | 151.7577617 | 140.1064263 | 149.9621728 | -1.172329512 | 7.979724901 | 7.1617387 |
| <b>B7LEY2</b> | TY-2482_chromosome | + | 2077161 | 2078933 | 285.6976372 | 263.5927911 | 289.2501617 | 764.0040023 | 507.6000497 | 836.2309512 | -1.292166464 | 8.557988959 | 7.7021004 |
| <b>B7LEY0</b> | TY-2482_chromosome | + | 2079015 | 2080460 | 196.0837176 | 153.8726009 | 190.931036  | 359.3632777 | 242.7741549 | 419.080398  | -0.831293157 | 4.21118667  | 3.6549603 |
| <b>B7LEY4</b> | TY-2482_chromosome | + | 2080465 | 2080884 | 147.2516836 | 140.0898618 | 165.2842418 | 161.6085169 | 134.5820621 | 174.7184866 | -0.011266722 | 0.09623383  | 0.0707605 |
| <b>B7LEY5</b> | TY-2482_chromosome | + | 2080945 | 2081673 | 248.1452889 | 262.8757079 | 278.0922774 | 375.2202546 | 337.6068977 | 319.9044727 | -0.409068661 | 1.24890516  | 1.0167066 |
| <b>B7LEY3</b> | TY-2482_chromosome | - | 2081723 | 2082820 | 456.8383199 | 501.6031296 | 460.0801507 | 525.4638657 | 509.6266338 | 482.9776869 | -0.138681395 | 0.207107582 | 0.1529592 |
| <b>B7LEY7</b> | TY-2482_chromosome | - | 2082816 | 2083208 | 155.2801495 | 213.9580515 | 166.845604  | 163.4959647 | 170.2014176 | 156.6871527 | 0.035472493  | 0.246884069 | 0.1832551 |
| <b>B7LEY8</b> | TY-2482_chromosome | - | 2083230 | 2084144 | 250.4219074 | 302.0475257 | 232.7379626 | 150.5812662 | 212.1660657 | 177.6673948 | 0.492176458  | 1.913307572 | 1.5961872 |
| <b>gcvB</b>   | TY-2482_chromosome | + | 2084273 | 2084478 | 16257.26029 | 22707.80251 | 9585.478765 | 4158.979837 | 15642.68203 | 5746.152274 | 0.754358347  | 1.236247618 | 1.0056845 |
| <b>B7N743</b> | TY-2482_chromosome | + | 2084439 | 2084752 | 314.3827382 | 466.727256  | 422.6818653 | 402.2925611 | 884.9417409 | 523.9855276 | -0.61276731  | 1.668973833 | 1.3836429 |
| <b>B7LEZ0</b> | TY-2482_chromosome | + | 2084914 | 2086116 | 1370.041955 | 1281.05575  | 1416.96782  | 1151.179563 | 1136.628848 | 1203.720425 | 0.253843536  | 0.55762871  | 0.4312921 |
| <b>B7LEY6</b> | TY-2482_chromosome | + | 2086119 | 2086559 | 566.1609657 | 553.8136327 | 526.7236958 | 485.9249654 | 496.8915075 | 486.8205997 | 0.157743803  | 0.389506747 | 0.2952537 |
| <b>B7LEZ2</b> | TY-2482_chromosome | - | 2086616 | 2087419 | 537.8584942 | 447.01776   | 501.1207415 | 731.5728862 | 677.9274251 | 778.6865072 | -0.508246731 | 2.200825725 | 1.8506843 |
| <b>B7LEZ1</b> | TY-2482_chromosome | - | 2087499 | 2088593 | 445.5136234 | 534.5892777 | 481.2512754 | 989.5847835 | 996.4852255 | 1057.664836 | -1.089878513 | 6.975842814 | 6.2333707 |
| <b>metV</b>   | TY-2482_chromosome | + | 2088802 | 2088878 | 676.5603807 | 498.3762611 | 459.0532716 | 357.0799832 | 861.4820235 | 299.6600178 | 0.123348036  | 0.14346363  | 0.1045664 |
| <b>metV</b>   | TY-2482_chromosome | + | 2088912 | 2088988 | 1327.38835  | 826.6494874 | 843.9686115 | 603.984298  | 1463.028243 | 521.9863872 | 0.26778782   | 0.332550395 | 0.2497764 |
| <b>metV</b>   | TY-2482_chromosome | + | 2089021 | 2089097 | 391.3320884 | 248.4413559 | 172.0078115 | 255.3770817 | 572.9441922 | 211.4599229 | -0.360179522 | 0.597361712 | 0.4643554 |
| <b>B7LEZ4</b> | TY-2482_chromosome | - | 2089174 | 2090424 | 370.1785414 | 395.7773219 | 335.7941594 | 600.5117352 | 515.9496084 | 522.4417102 | -0.635733031 | 2.342198437 | 1.9766572 |
| <b>B7LEZ5</b> | TY-2482_chromosome | + | 2090656 | 2091984 | 182.6906344 | 143.255896  | 163.0417674 | 169.7211159 | 167.5132303 | 118.946966  | 0.099148872  | 0.195868172 | 0.1447275 |
| <b>B7LEZ6</b> | TY-2482_chromosome | - | 2092052 | 2093875 | 931.834639  | 820.5562922 | 980.6443316 | 1216.864019 | 1105.63076  | 1353.504915 | -0.364485742 | 1.415826835 | 1.1633619 |
| <b>B7LEZ3</b> | TY-2482_chromosome | - | 2093878 | 2097417 | 1818.61986  | 1990.056928 | 1920.61159  | 2690.506513 | 2498.922438 | 3078.238568 | -0.525111224 | 0.894891838 | 0.7152729 |
| <b>B7LEZ8</b> | TY-2482_chromosome | - | 2097413 | 2100298 | 1083.489448 | 1169.214858 | 1169.983114 | 2963.053234 | 2779.226383 | 3345.343963 | -1.398044328 | 6.407982026 | 5.6896506 |
| <b>B7LEZ9</b> | TY-2482_chromosome | - | 2100477 | 2103842 | 1246.717831 | 1177.496599 | 1165.871075 | 1372.305225 | 1387.770601 | 1696.773302 | -0.272747195 | 0.880457074 | 0.7029838 |
| <b>B7LEZ7</b> | TY-2482_chromosome | - | 2103858 | 2104178 | 59.04791567 | 61.59907679 | 58.01820437 | 65.34710216 | 51.81325671 | 52.7955161  | 0.02440761   | 0.098388089 | 0.0723659 |
| <b>B7LF01</b> | TY-2482_chromosome | - | 2104166 | 2104570 | 47.82198041 | 51.13196754 | 46.77535787 | 37.62688595 | 55.6118151  | 48.64214053 | 0.052358179  | 0.04584857  | 0.0316303 |
| <b>A1AF37</b> | TY-2482_chromosome | - | 2104570 | 2105370 | 41.79465679 | 39.57319456 | 48.41631719 | 32.15837977 | 29.99176579 | 34.12031181 | 0.475799716  | 1.035984994 | 0.8327016 |
| <b>Q0TE06</b> | TY-2482_chromosome | + | 2105580 | 2105780 | 58.16418345 | 77.68920836 | 57.17865391 | 153.412214  | 194.8607113 | 155.450843  | -1.467079265 | 9.666775667 | 8.7571663 |
| <b>B7LF04</b> | TY-2482_chromosome | - | 2105779 | 2106570 | 1354.394232 | 1298.434216 | 1268.857298 | 2626.575547 | 2987.708543 | 3161.224674 | -1.131092449 | 4.264686824 | 3.7057117 |
| <b>B7LF05</b> | TY-2482_chromosome | - | 2106580 | 2107452 | 994.6697559 | 920.3261942 | 981.7892468 | 1911.535668 | 2011.201319 | 2150.884275 | -1.028090371 | 6.730195672 | 5.9904511 |
| <b>B7LF06</b> | TY-2482_chromosome | - | 2107606 | 2109849 | 4019.577524 | 4111.049609 | 4128.450708 | 5053.108708 | 4039.616075 | 4748.000008 | -0.18973677  | 0.197630753 | 0.1460617 |
| <b>B7LF07</b> | TY-2482_chromosome | - | 2109865 | 2110392 | 2503.75189  | 2603.67947  | 2376.678913 | 1564.260614 | 1703.670053 | 1475.011368 | 0.628018389  | 1.894084672 | 1.5789348 |
| <b>B7LF08</b> | TY-2482_chromosome | + | 2111077 | 2111763 | 233.9030388 | 267.2718653 | 256.8526416 | 137.3932332 | 135.623677  | 114.7520286 | 0.918304908  | 5.594858511 | 4.9324621 |
| <b>B7LF09</b> | TY-2482_chromosome | + | 2111835 | 2112545 | 184.9220084 | 153.0593337 | 160.310019  | 154.0630353 | 184.8004331 | 168.4342876 | 0.017716308  | 0.031283549 | 0.0211754 |
| <b>Q1R7H9</b> | TY-2482_chromosome | - | 2112623 | 2112907 | 584.1607724 | 563.9863395 | 512.7644841 | 174.4001121 | 493.0142872 | 135.3465244 | 1.027019235  | 3.000804776 | 2.5610437 |
| <b>B7LF11</b> | TY-2482_chromosome | + | 2113012 | 2114049 | 1470.934589 | 1504.378011 | 1527.80765  | 2031.601993 | 2104.893422 | 2600.553644 | -0.540219932 | 1.61155166  | 1.3354827 |
| <b>B7LF12</b> | TY-2482_chromosome | - | 2114087 | 2115277 | 372.4311197 | 368.442598  | 361.7358794 | 326.7305601 | 342.1268343 | 424.5246467 | 0.052034816  | 0.020240563 | 0.013528  |

|               |                    |   |         |         |             |             |             |             |             |             |              |             |           |
|---------------|--------------------|---|---------|---------|-------------|-------------|-------------|-------------|-------------|-------------|--------------|-------------|-----------|
| <b>B7LF13</b> | TY-2482_chromosome | - | 2115273 | 2117429 | 590.700293  | 590.4410121 | 651.8180247 | 887.8076727 | 828.9853447 | 999.607715  | -0.529885132 | 2.370077942 | 2.0008696 |
| <b>B7LF02</b> | TY-2482_chromosome | + | 2118015 | 2119043 | 756.0041269 | 775.3658355 | 779.7446358 | 670.9752267 | 725.3172409 | 741.9221637 | 0.126811079  | 0.243269275 | 0.1804108 |
| <b>B7LF15</b> | TY-2482_chromosome | - | 2119056 | 2120315 | 291.6458595 | 308.4307503 | 271.8112966 | 446.8612156 | 521.4729244 | 554.9639822 | -0.800300353 | 3.960532044 | 3.4231928 |
| <b>B7LF16</b> | TY-2482_chromosome | + | 2120437 | 2121369 | 220.8322469 | 176.5812828 | 194.6975518 | 135.6334113 | 146.4871181 | 173.3284822 | 0.457679371  | 1.213368344 | 0.9855473 |
| <b>B7LF17</b> | TY-2482_chromosome | - | 2121362 | 2122051 | 151.4615194 | 190.1970159 | 204.9956991 | 215.7268002 | 228.3722836 | 285.0574724 | -0.379360039 | 1.276647    | 1.0411189 |
| <b>B7LF18</b> | TY-2482_chromosome | - | 2122183 | 2123598 | 299.2357546 | 290.8452584 | 259.2120186 | 234.8803074 | 295.8874871 | 227.8776181 | 0.143579642  | 0.360122096 | 0.2720193 |
| <b>B7LF19</b> | TY-2482_chromosome | - | 2123964 | 2124722 | 113.3213618 | 176.8826308 | 124.5179272 | 48.7848005  | 55.45558045 | 78.31718667 | 1.128985118  | 6.216616599 | 5.5105473 |
| <b>B7LF20</b> | TY-2482_chromosome | - | 2124755 | 2125588 | 98.03693818 | 95.24376096 | 87.62495688 | 55.83749544 | 47.23470285 | 61.60168776 | 0.770949306  | 3.452638899 | 2.9623796 |
| <b>B7LF21</b> | TY-2482_chromosome | - | 2125878 | 2127056 | 254.1270037 | 304.9590115 | 251.3346348 | 338.7762065 | 356.7543957 | 344.7328227 | -0.416221838 | 1.123375286 | 0.9091666 |
| <b>B7LF14</b> | TY-2482_chromosome | + | 2127311 | 2128537 | 336.5385929 | 324.9393458 | 332.7408113 | 463.9308304 | 570.6570927 | 549.8426668 | -0.63613478  | 2.932584477 | 2.4995809 |
| <b>B7LF22</b> | TY-2482_chromosome | + | 2129966 | 2130772 | 143.4728162 | 154.3749266 | 153.8677928 | 116.2902696 | 127.6806025 | 26.30828767 | 0.595172131  | 1.664548785 | 1.3801347 |
| <b>B7LF50</b> | TY-2482_chromosome | - | 2145549 | 2147198 | 26.77985775 | 40.78138409 | 23.36399728 | 39.9260279  | 20.85406826 | 11.27675409 | 0.045473491  | 0.426793162 | 0.3257347 |
| <b>B7LF51</b> | TY-2482_chromosome | - | 2147545 | 2148297 | 600.5697377 | 592.2917274 | 547.8073626 | 263.5359576 | 332.2070237 | 344.4537143 | 0.917936332  | 4.771506573 | 4.1655822 |
| <b>E6BGA4</b> | TY-2482_chromosome | - | 2148297 | 2148485 | 79.93980321 | 82.56616834 | 85.22265147 | 53.50211813 | 78.42523376 | 54.22771168 | 0.420005084  | 1.168727741 | 0.9497834 |
| <b>B7LF45</b> | TY-2482_chromosome | + | 2148751 | 2151006 | 123.3245436 | 149.9020456 | 108.5472167 | 100.6695147 | 68.07882432 | 110.0999933 | 0.379671102  | 1.344369856 | 1.1006652 |
| <b>B7LF53</b> | TY-2482_chromosome | + | 2151020 | 2151895 | 47.33061499 | 34.91714293 | 40.19247836 | 67.30252786 | 38.93308053 | 70.64029273 | -0.476148337 | 1.273693377 | 1.0387393 |
| <b>B7LF54</b> | TY-2482_chromosome | + | 2151895 | 2152371 | 26.07041416 | 26.29287372 | 30.53365022 | 48.86913412 | 30.78310401 | 49.71828859 | -0.618957286 | 1.645142196 | 1.3638309 |
| <b>B7LF52</b> | TY-2482_chromosome | - | 2152417 | 2154192 | 511.4318262 | 573.4083903 | 502.2681476 | 1255.470129 | 785.2599678 | 704.4758345 | -0.926019557 | 3.283253171 | 2.8102988 |
| <b>B7LF57</b> | TY-2482_chromosome | + | 2155916 | 2157109 | 64.50229978 | 61.32724148 | 47.78587302 | 58.31004186 | 71.99801119 | 52.92779784 | -0.122862277 | 0.137826409 | 0.1012127 |
| <b>B7LF58</b> | TY-2482_chromosome | + | 2157170 | 2158378 | 40.14424019 | 63.58698404 | 39.2500362  | 65.27387285 | 49.04173287 | 60.46759416 | -0.444952513 | 0.621710438 | 0.4852001 |
| <b>B7LF59</b> | TY-2482_chromosome | + | 2158434 | 2159816 | 32.03176026 | 37.9513933  | 34.29344764 | 44.04296558 | 38.15657673 | 45.92627408 | -0.32619595  | 0.603287648 | 0.4695051 |
| <b>B7LF60</b> | TY-2482_chromosome | + | 2159867 | 2160796 | 63.51532254 | 66.77778416 | 63.99144897 | 75.63874134 | 70.05381682 | 68.52828551 | -0.168390534 | 0.298395216 | 0.2232677 |
| <b>B7LF61</b> | TY-2482_chromosome | - | 2160843 | 2162465 | 82.8649354  | 92.43343679 | 91.828448   | 214.478371  | 111.7389844 | 141.0305092 | -0.894182479 | 3.231257243 | 2.7650362 |
| <b>B7LF56</b> | TY-2482_chromosome | - | 2162516 | 2163283 | 48.73170819 | 35.41466064 | 48.34383782 | 203.7401977 | 137.3223332 | 129.3777315 | -1.822320867 | 1.37873071  | 1.2775688 |
| <b>B7LF63</b> | TY-2482_chromosome | + | 2163386 | 2163961 | 223.4031987 | 271.7812481 | 241.5781873 | 180.3431262 | 168.4076496 | 118.99111   | 0.55143173   | 2.600923414 | 2.2068674 |
| <b>B7LF64</b> | TY-2482_chromosome | + | 2164286 | 2167381 | 73.23457094 | 77.06841724 | 73.89548596 | 177.7485685 | 125.4585494 | 153.9302809 | -1.066794464 | 6.0114373   | 5.3182334 |
| <b>B7LF62</b> | TY-2482_chromosome | + | 2167387 | 2168712 | 15.49367493 | 20.22939527 | 20.61249135 | 85.97568491 | 71.77605331 | 103.5148573 | -2.201718361 | 15.32355459 | 14.170714 |
| <b>B7LF66</b> | TY-2482_chromosome | + | 2168766 | 2169542 | 24.31277909 | 35.43722002 | 37.95895458 | 116.3067784 | 97.27918346 | 123.4558546 | -1.797666932 | 12.95641606 | 11.883658 |
| <b>B7LF67</b> | TY-2482_chromosome | + | 2169542 | 2172409 | 153.966641  | 195.6536353 | 131.5633864 | 390.8995732 | 295.6162024 | 419.3379377 | -1.296927652 | 7.079346893 | 6.3209143 |
| <b>B7LF65</b> | TY-2482_chromosome | + | 2172577 | 2173974 | 47.0532004  | 44.61045235 | 52.32208788 | 50.07765845 | 37.19819809 | 51.11952334 | 0.089059532  | 0.080177842 | 0.0582929 |
| <b>B7LF69</b> | TY-2482_chromosome | + | 2173992 | 2175308 | 118.2015992 | 113.5595354 | 111.4850801 | 135.9037019 | 109.9783842 | 163.9740602 | -0.226233635 | 0.642313055 | 0.5020075 |
| <b>B7LF70</b> | TY-2482_chromosome | + | 2175347 | 2176711 | 104.0446582 | 100.3399153 | 90.22275569 | 95.89281385 | 82.72651231 | 105.0145264 | 0.052547579  | 0.097218947 | 0.1714428 |
| <b>B7LF68</b> | TY-2482_chromosome | - | 2176753 | 2177238 | 42.21029487 | 23.16426646 | 35.00349658 | 27.41606975 | 18.13216551 | 17.38336443 | 0.72067547   | 1.544038512 | 1.2735043 |
| <b>B7LF72</b> | TY-2482_chromosome | - | 2177241 | 2179157 | 65.10397628 | 62.08322331 | 61.31632361 | 72.61788157 | 32.56238158 | 44.96861289 | 0.250002315  | 0.657256469 | 0.5140494 |
| <b>B7LF71</b> | TY-2482_chromosome | + | 2181291 | 2181836 | 254.2156195 | 257.719732  | 261.4647199 | 187.6444216 | 202.9501738 | 205.177651  | 0.391737037  | 1.247645065 | 1.0158013 |
| <b>B7LF75</b> | TY-2482_chromosome | - | 2181885 | 2183399 | 5137.072868 | 4475.071871 | 4597.100132 | 8955.022836 | 8098.453473 | 10375.90154 | -0.904708002 | 1.854449731 | 1.5457397 |
| <b>B7LF76</b> | TY-2482_chromosome | - | 2183412 | 2184507 | 2541.940596 | 2465.254998 | 2425.612756 | 5287.342199 | 4372.67348  | 5833.099356 | -1.044723172 | 2.383273412 | 2.0124006 |
| <b>B7LF77</b> | TY-2482_chromosome | - | 2184601 | 2186331 | 1799.986621 | 1816.215078 | 1886.346621 | 2970.455201 | 2369.636463 | 3247.902704 | -0.623203006 | 1.179016995 | 0.9577388 |
| <b>B7LF74</b> | TY-2482_chromosome | - | 2186340 | 2187047 | 984.8262673 | 986.9919303 | 1061.776294 | 1300.923955 | 1149.294368 | 1481.047035 | -0.339931491 | 1.148938269 | 0.9317587 |
| <b>B7LF79</b> | TY-2482_chromosome | - | 2187075 | 2187968 | 800.1398342 | 776.0131197 | 853.8134012 | 910.2364474 | 847.2079723 | 934.0012049 | -0.122563646 | 0.355316479 | 0.2684373 |
| <b>B7LF80</b> | TY-2482_chromosome | + | 2188080 | 2188598 | 1396.234318 | 1388.326154 | 1328.93463  | 946.2378821 | 1009.270191 | 957.8310072 | 0.492591726  | 1.864395919 | 1.5541335 |
| <b>B7LF81</b> | TY-2482_chromosome | - | 2188644 | 2189048 | 1118.90545  | 1015.360395 | 994.8111483 | 711.733017  | 848.2697238 | 673.8727813 | 0.487943095  | 1.892245265 | 1.5780185 |
| <b>B7LF82</b> | TY-2482_chromosome | - | 2189032 | 2189285 | 917.615103  | 871.2119574 | 916.4246595 | 578.2781046 | 736.3453059 | 598.7933469 | 0.522871653  | 1.967244292 | 1.6426392 |
| <b>B7LF83</b> | TY-2482_chromosome | + | 2189538 | 2190515 | 1353.036633 | 1139.641476 | 1202.188654 | 1608.866912 | 1646.271601 | 1710.234358 | -0.387347255 | 1.427824489 | 1.1736544 |
| <b>D8A3I5</b> | TY-2482_chromosome | - | 2190599 | 2191285 | 956.6267112 | 792.3595428 | 921.7613692 | 312.996976  | 387.7790743 | 322.4932944 | 1.438675271  | 10.40164857 | 9.4541102 |
| <b>B7LF85</b> | TY-2482_chromosome | + | 2191422 | 2191730 | 397.041994  | 402.0431672 | 414.6705134 | 228.1502323 | 337.8421124 | 221.4408975 | 0.629630073  | 2.392973243 | 2.0214293 |
| <b>B7LF86</b> | TY-2482_chromosome | + | 2191769 | 2193205 | 1539.719775 | 1571.479258 | 1638.116953 | 2757.076403 | 2409.750025 | 2661.46052  | -0.72245186  | 2.050344656 | 1.7152815 |
| <b>B7LF88</b> | TY-2482_chromosome | - | 2193268 | 2194008 | 101.5580228 | 129.3237519 | 98.09516089 | 292.6193264 | 293.876214  | 378.4484268 | -1.591020469 | 11.72865176 | 10.714728 |
| <b>B7LF89</b> | TY-2482_chromosome | - | 2194272 | 2197142 | 7878.307253 | 8664.878831 | 8908.670211 | 31062.55822 | 23841.36938 | 34902.81886 | -1.806833605 | 4.720787374 | 4.1191078 |
| <b>B7LF90</b> | TY-2482_chromosome | - | 2197264 | 2197650 | 2965.795522 | 3173.337535 | 3245.137227 | 7193.823742 | 6229.209622 | 7611.935093 | -1.15991913  | 2.685325103 | 2.28861   |
| <b>B7LF91</b> | TY-2482_chromosome | - | 2197677 | 2198768 | 5569.855124 | 5553.804197 | 5804.181385 | 15259.90121 | 12096.289   | 14949.19072 | -1.318709233 | 3.042703038 | 2.598466  |
| <b>B7LF87</b> | TY-2482_chromosome | - | 2199219 | 2200418 | 1198.063059 | 1217.975432 | 1104.37433  | 2266.69895  | 1821.839842 | 1977.455697 | -0.830375613 | 3.928881509 | 3.394366  |
| <b>B7LF93</b> | TY-2482_chromosome | - | 2200444 | 2201619 | 2499.350614 | 2298.317408 | 2393.31817  | 3628.835647 | 2481.542226 | 3366.502778 | -0.398351327 | 0.574876433 | 0.4456024 |
| <b>B7LF92</b> | TY-2482_chromosome | - | 2201619 | 2202941 | 4309.043685 | 4160.442875 | 4359.560014 | 6227.965985 | 4681.159176 | 6279.188165 | -0.410965877 | 0.583754678 | 0.4530687 |
| <b>D3GTS3</b> | TY-2482_chromosome | - | 2202970 | 2203551 | 1953.351178 | 1842.506648 | 2018.432049 | 2480.67914  | 2002.920958 | 2379.862935 | -0.224878839 | 0.404036515 | 0.3063884 |
| <b>D6JEQ2</b> | TY-2482_chromosome | + | 2203576 | 2203761 | 631.9792087 | 620.680745  | 578.8494654 | 252.983486  | 389.7036979 | 277.8623126 | 0.998976856  | 5.403215283 | 4.7511906 |
| <b>B7LFG9</b> | TY-2482_chromosome | + | 2203713 | 2204039 | 3374.421258 | 3024.490976 | 2915.390346 | 1377.318788 | 2229.001947 | 1316.160846 | 0.926550001  | 1.954630753 | 1.6317449 |

|               |                    |   |         |         |             |             |              |             |             |             |              |             |           |
|---------------|--------------------|---|---------|---------|-------------|-------------|--------------|-------------|-------------|-------------|--------------|-------------|-----------|
| <b>ssrS</b>   | TY-2482_chromosome | + | 2204084 | 2204266 | 331018.2154 | 120170.9084 | 62850.77875  | 80644.29982 | 562786.3451 | 28696.57225 | -0.322851296 | 0.233143791 | 0.173026  |
| <b>A8A452</b> | TY-2482_chromosome | + | 2204144 | 2204887 | 330576.9944 | 119866.9657 | 62506.7943   | 80683.70368 | 562622.5352 | 28801.82153 | -0.325812451 | 0.235413518 | 0.1746395 |
| <b>rygC</b>   | TY-2482_chromosome | + | 2204916 | 2205066 | 100.9626458 | 121.2839083 | 79.35978713  | 36.0283072  | 77.62257724 | 48.89555486 | 0.833006714  | 3.139983411 | 2.6820349 |
| <b>E11F6</b>  | TY-2482_chromosome | - | 2205066 | 2205275 | 38.98126155 | 38.31267333 | 32.09147172  | 9.014231856 | 35.84607688 | 16.08748452 | 0.872775725  | 1.833052604 | 1.5264682 |
| <b>rygC</b>   | TY-2482_chromosome | + | 2205308 | 2205455 | 57.80741428 | 60.13030084 | 35.65989972  | 20.14623642 | 70.56202686 | 17.93143039 | 0.415629414  | 0.75516041  | 0.5979687 |
| <b>B7LFG7</b> | TY-2482_chromosome | - | 2205674 | 2206903 | 1195.605489 | 1362.055903 | 1334.39102   | 1342.21579  | 1469.770229 | 1360.431433 | -0.116020074 | 0.205665667 | 0.1520119 |
| <b>A1AFA2</b> | TY-2482_chromosome | - | 2207162 | 2207854 | 2696.320271 | 1998.156225 | 2216.928922  | 2787.634871 | 2921.257412 | 3061.331798 | -0.276440626 | 0.480633907 | 0.3677537 |
| <b>B7LFH3</b> | TY-2482_chromosome | + | 2208201 | 2209091 | 774.3356743 | 619.3186491 | 615.0765304  | 466.6074914 | 562.4664555 | 532.7875626 | 0.409650372  | 1.090660731 | 0.8814102 |
| <b>B5YQB0</b> | TY-2482_chromosome | + | 2209298 | 2211439 | 92.70305042 | 92.89360372 | 93.74264227  | 81.25049683 | 73.76402024 | 46.69677377 | 0.398885808  | 1.378579211 | 1.130348  |
| <b>B7LFH1</b> | TY-2482_chromosome | + | 2211435 | 2212427 | 27.97032145 | 23.13712796 | 16.71568747  | 33.59651166 | 32.77450651 | 27.85122222 | -0.521755404 | 0.969444155 | 0.7766696 |
| <b>B7LFH7</b> | TY-2482_chromosome | + | 2212441 | 2213223 | 30.31156266 | 19.25809311 | 18.80476213  | 44.36127006 | 38.22381205 | 29.35370903 | -0.721947964 | 1.82277177  | 1.5170349 |
| <b>B7LFH6</b> | TY-2482_chromosome | + | 2213250 | 2214725 | 46.93703976 | 47.31574241 | 60.43758967  | 103.6052884 | 80.03108133 | 74.01108501 | -0.744807492 | 2.782434744 | 2.3673662 |
| <b>E9WIW1</b> | TY-2482_chromosome | - | 2214673 | 2215621 | 72.58906099 | 67.46354861 | 69.27587142  | 126.2677673 | 118.3052391 | 106.7999603 | -0.759392442 | 3.672966156 | 3.1588469 |
| <b>B7LFI0</b> | TY-2482_chromosome | - | 2215791 | 2216528 | 971.3719034 | 953.728882  | 1057.194343  | 1203.034323 | 1208.529041 | 1270.813784 | -0.273714376 | 0.862305387 | 0.6872596 |
| <b>B7LFH8</b> | TY-2482_chromosome | - | 2216624 | 2217256 | 104.5554288 | 99.24965847 | 129.80973219 | 89.54368716 | 115.6291313 | 114.3071667 | 0.153181674  | 0.126203164 | 0.0927098 |
| <b>B7LFI2</b> | TY-2482_chromosome | - | 2217398 | 2218255 | 2015.996547 | 2209.950201 | 2293.792614  | 3258.55449  | 3447.288039 | 3375.881618 | -0.625440163 | 1.125112475 | 0.910592  |
| <b>B7LFI1</b> | TY-2482_chromosome | - | 2218616 | 2219692 | 19885.81931 | 18412.75322 | 19916.69497  | 44200.27695 | 39254.0775  | 47714.49007 | -1.137203989 | 2.267500196 | 1.90875   |
| <b>B7LFI4</b> | TY-2482_chromosome | - | 2219910 | 2221070 | 15537.13643 | 14409.912   | 15524.14598  | 26566.5838  | 21874.78445 | 29097.12622 | -0.734212425 | 1.199855158 | 0.9739593 |
| <b>B7LFI3</b> | TY-2482_chromosome | - | 2221123 | 2222139 | 8461.86738  | 7854.252472 | 8070.000847  | 2716.882791 | 2545.366761 | 2789.021754 | 1.615786529  | 4.516006186 | 3.933301  |
| <b>B7LFI6</b> | TY-2482_chromosome | + | 2222511 | 2222939 | 301.9618002 | 366.7736191 | 306.8279963  | 3.381864134 | 3.675746529 | 6.834775409 | 6.834775409  | 90.19218921 | 87.435934 |
| <b>B7LFI5</b> | TY-2482_chromosome | + | 2222866 | 2223540 | 436.6656008 | 468.3201872 | 438.3088743  | 11.95808837 | 9.988031647 | 9.34445228  | 5.363644522  | 82.13135318 | 79.551189 |
| <b>B7LFI8</b> | TY-2482_chromosome | + | 2223544 | 2224248 | 248.3661017 | 212.5880358 | 247.0246883  | 15.83461826 | 11.75132828 | 16.95208141 | 4.033014632  | 55.03731662 | 53.068167 |
| <b>B7LFI9</b> | TY-2482_chromosome | + | 2224233 | 2224913 | 138.2950851 | 148.8512048 | 135.888916   | 4.778837626 | 10.03801169 | 12.77676217 | 4.002449262  | 43.71434248 | 41.93581  |
| <b>B7LFI7</b> | TY-2482_chromosome | + | 2224877 | 2225584 | 135.3607058 | 136.4269412 | 129.9623149  | 55.19441862 | 46.32398247 | 60.29678193 | 1.312203172  | 9.749144868 | 8.8340922 |
| <b>B7LFI1</b> | TY-2482_chromosome | - | 2225562 | 2226272 | 364.1209468 | 415.9404199 | 343.7267737  | 249.6464942 | 238.4225292 | 230.3566084 | 0.579671514  | 2.78032142  | 2.3655003 |
| <b>B7LFI2</b> | TY-2482_chromosome | - | 2226272 | 2226778 | 389.7302161 | 390.8395979 | 323.814242   | 261.7837628 | 331.3773422 | 259.4248542 | 0.339624416  | 1.125198115 | 0.910592  |
| <b>B7LFI0</b> | TY-2482_chromosome | - | 2226803 | 2227765 | 25.53597333 | 21.3056723  | 22.35532414  | 42.83773178 | 32.66194963 | 43.2656202  | -0.754551316 | 2.220414282 | 1.8687786 |
| <b>B7LFI7</b> | TY-2482_chromosome | - | 2231230 | 2232318 | 9490.242492 | 8757.897707 | 8016.957348  | 24754.67814 | 21139.48636 | 26337.0573  | -1.457777955 | 3.349186896 | 2.8685305 |
| <b>D3GTU8</b> | TY-2482_chromosome | + | 2233370 | 2234251 | 669.0295768 | 866.3823988 | 762.5323888  | 1140.961602 | 1009.209362 | 1001.335443 | -0.533834968 | 1.696469558 | 1.4085612 |
| <b>Q47649</b> | TY-2482_chromosome | + | 2234307 | 2235320 | 1591.317338 | 1717.543434 | 1608.249119  | 2100.812487 | 1983.855907 | 2270.578874 | -0.380012099 | 0.833206877 | 0.662734  |
| <b>B7LFI0</b> | TY-2482_chromosome | - | 2236396 | 2238369 | 3179.249429 | 2659.524085 | 2885.174336  | 6953.582727 | 5705.009397 | 6916.047148 | -1.134170659 | 2.711856043 | 2.3075416 |
| <b>B7LFI3</b> | TY-2482_chromosome | + | 2238645 | 2238857 | 408.4065116 | 381.5940181 | 376.2137429  | 592.2348826 | 668.0385441 | 581.6679315 | -0.65537709  | 2.964983387 | 2.5283542 |
| <b>B7LFI1</b> | TY-2482_chromosome | - | 2238860 | 2239108 | 89.44350799 | 63.11535999 | 60.35114448  | 130.2717852 | 150.1391539 | 178.5244575 | -1.026782593 | 6.183911605 | 5.4797725 |
| <b>B7LFI4</b> | TY-2482_chromosome | + | 2239164 | 2240315 | 2255.918747 | 1673.271007 | 1694.515771  | 4481.177575 | 4526.519708 | 5911.865492 | -1.324642401 | 3.799717448 | 3.2739107 |
| <b>B7LFI6</b> | TY-2482_chromosome | + | 2240754 | 2242145 | 558.8431511 | 447.2335467 | 509.0322471  | 968.6331779 | 878.1192545 | 1068.032528 | -0.881635004 | 5.862444385 | 4.7118881 |
| <b>B5YQE2</b> | TY-2482_chromosome | + | 2242174 | 2242719 | 60.75501433 | 56.45005905 | 46.52545122  | 49.59230017 | 46.45644371 | 30.78419845 | 0.285051928  | 0.802594567 | 0.63796   |
| <b>B7LFI5</b> | TY-2482_chromosome | + | 2242817 | 2243521 | 213.0137549 | 231.5355275 | 227.8006032  | 164.9844486 | 137.3308365 | 163.0363034 | 0.514444215  | 2.034424316 | 1.7012096 |
| <b>B7LFI9</b> | TY-2482_chromosome | + | 2243604 | 2244332 | 640.1953044 | 633.5186334 | 590.078142   | 934.6310956 | 821.7084405 | 922.1832414 | -0.539001671 | 2.110916493 | 1.7694253 |
| <b>B7LFI0</b> | TY-2482_chromosome | + | 2244348 | 2245295 | 1234.656728 | 1269.652426 | 1207.471233  | 2006.219133 | 1815.461147 | 2299.366986 | -0.713126765 | 3.331868087 | 2.8532217 |
| <b>B7LFI1</b> | TY-2482_chromosome | + | 2245407 | 2245967 | 490.5943124 | 506.9184449 | 452.7138375  | 919.5401582 | 762.5191872 | 941.7965857 | -0.878851816 | 4.624156236 | 4.0333675 |
| <b>B7LFI2</b> | TY-2482_chromosome | + | 2245970 | 2246383 | 277.4036052 | 307.9762575 | 257.8996253  | 483.6242189 | 376.6498659 | 455.1283826 | -0.70038556  | 2.667319667 | 2.2663718 |
| <b>B7LFI8</b> | TY-2482_chromosome | - | 2246565 | 2247542 | 36.39437208 | 52.20194146 | 41.50627243  | 49.64235745 | 38.16673149 | 37.07491804 | -0.062793472 | 0.049633519 | 0.0347265 |
| <b>B7LFI4</b> | TY-2482_chromosome | + | 2247560 | 2248261 | 493.0134305 | 403.2800506 | 450.9206769  | 597.6049608 | 519.5373153 | 668.0239384 | -0.347235095 | 1.310691411 | 1.0708058 |
| <b>B7LFI5</b> | TY-2482_chromosome | + | 2248282 | 2248845 | 572.030613  | 567.199151  | 613.4748914  | 880.4039119 | 948.2580387 | 1047.002068 | -0.67019351  | 3.626265432 | 3.1176762 |
| <b>B7LFI6</b> | TY-2482_chromosome | + | 2248845 | 2249132 | 262.54257   | 257.5290531 | 241.4838393  | 430.1990467 | 379.4122635 | 449.7757404 | -0.729482531 | 3.436850646 | 2.9489389 |
| <b>B7LFI7</b> | TY-2482_chromosome | + | 2249143 | 2249733 | 583.4237838 | 465.7453349 | 599.0645305  | 921.3016981 | 823.4961728 | 1073.173624 | -0.680881247 | 3.68512152  | 3.169727  |
| <b>B7LFI8</b> | TY-2482_chromosome | + | 2249729 | 2250862 | 637.2935127 | 564.8916429 | 580.9120395  | 895.0419283 | 796.1936532 | 1037.657212 | -0.571895536 | 2.631668898 | 2.3228716 |
| <b>B7LFI3</b> | TY-2482_chromosome | - | 2251023 | 2252027 | 52.00330931 | 77.81950114 | 65.37326079  | 42.60923922 | 33.67407927 | 21.63515619 | 0.833830166  | 3.632173034 | 3.1226621 |
| <b>B7LFI0</b> | TY-2482_chromosome | - | 2252147 | 2253190 | 4896.832173 | 4678.395993 | 5089.184301  | 200.1674595 | 185.5659323 | 239.0831721 | 4.600929041  | 28.0036248  | 26.553794 |
| <b>B7LFI9</b> | TY-2482_chromosome | - | 2253369 | 2254085 | 410.2382391 | 546.9389694 | 487.2637695  | 1396.543226 | 1583.500588 | 1661.444001 | -1.71211269  | 14.32465346 | 13.208133 |
| <b>B7LFI2</b> | TY-2482_chromosome | - | 2254272 | 2254595 | 1022.865809 | 1186.557915 | 1102.561087  | 1216.194125 | 1271.360668 | 1202.55894  | -0.188948355 | 0.354381581 | 0.2676752 |
| <b>B7LFI3</b> | TY-2482_chromosome | - | 2254598 | 2255314 | 683.4482273 | 761.4240172 | 661.3620728  | 860.291067  | 892.784807  | 819.7728701 | -0.335896193 | 0.878000924 | 0.700814  |
| <b>B7LFI4</b> | TY-2482_chromosome | + | 2255475 | 2256524 | 537.7543986 | 465.1114045 | 551.4519159  | 857.4753966 | 959.2254781 | 924.8709192 | -0.75903804  | 4.278103357 | 3.718093  |
| <b>E7HG43</b> | TY-2482_chromosome | + | 2256555 | 2256864 | 574.3124097 | 559.465854  | 594.2743407  | 720.7296801 | 997.5900355 | 719.9693396 | -0.478364807 | 1.752371742 | 1.4581395 |
| <b>B7LFI1</b> | TY-2482_chromosome | + | 2256895 | 2257971 | 353.0502582 | 320.2202616 | 341.3373449  | 452.4173733 | 431.3125287 | 491.8710626 | -0.403865986 | 1.498590933 | 1.2346413 |
| <b>B7LFI7</b> | TY-2482_chromosome | + | 2258176 | 2259429 | 479.3885338 | 466.4424077 | 462.7549149  | 2330.994865 | 1962.006823 | 2061.667714 | -2.193535025 | 23.49732054 | 22.119008 |
| <b>B7LFI6</b> | TY-2482_chromosome | - | 2259485 | 2261617 | 311.8143914 | 294.5532248 | 334.2361495  | 359.7239956 | 349.3973625 | 423.3280296 | -0.212354712 | 0.721242429 | 0.5679958 |

|               |                    |   |         |         |             |             |             |             |             |             |              |              |           |
|---------------|--------------------|---|---------|---------|-------------|-------------|-------------|-------------|-------------|-------------|--------------|--------------|-----------|
| <b>B7LFM9</b> | TY-2482_chromosome | + | 2262015 | 2262719 | 867.3938092 | 904.1839915 | 929.0160573 | 89.34568608 | 99.28005822 | 72.75112481 | 3.342559151  | 48.57165921  | 46.697643 |
| <b>B7LBZ3</b> | TY-2482_chromosome | + | 2262789 | 2263034 | 107.850727  | 100.3793093 | 87.50489281 | 21.30988218 | 20.06608    | 11.01284876 | 2.40649159   | 20.30412055  | 19.010263 |
| <b>B7LFN0</b> | TY-2482_chromosome | + | 2263101 | 2264360 | 154.9939881 | 134.5454338 | 130.5174186 | 91.87877923 | 89.14935643 | 98.56316178 | 0.607347321  | 2.553649854  | 2.1638172 |
| <b>E1U309</b> | TY-2482_chromosome | + | 2264776 | 2265470 | 306.5716522 | 321.6182893 | 301.6255144 | 107.413993  | 137.5170176 | 113.2900951 | 1.367895422  | 10.48708371  | 9.5336018 |
| <b>B7LFN2</b> | TY-2482_chromosome | - | 2266346 | 2266936 | 101.2273956 | 96.88555991 | 66.74098443 | 22.93586234 | 56.75817174 | 26.75723382 | 1.280529279  | 5.193661739  | 4.5555054 |
| <b>B7LFN4</b> | TY-2482_chromosome | + | 2267329 | 2270193 | 2131.354405 | 2086.61838  | 2077.040574 | 2273.645538 | 2043.000819 | 2306.176229 | -0.070645845 | 0.092607102  | 0.0678395 |
| <b>B7LFN3</b> | TY-2482_chromosome | + | 2270198 | 2271199 | 2725.851185 | 2735.603097 | 2718.810167 | 2590.325537 | 2174.941297 | 2460.167306 | 0.166984035  | 0.215006802  | 0.1588853 |
| <b>B7LFN6</b> | TY-2482_chromosome | + | 2271212 | 2273596 | 4947.666885 | 5020.28593  | 4974.177165 | 4846.188837 | 3961.356189 | 4671.66486  | 0.136761286  | 0.162233173  | 0.1190479 |
| <b>B7LFN7</b> | TY-2482_chromosome | + | 2273609 | 2275234 | 2726.454212 | 3123.646623 | 2919.526786 | 5701.827006 | 4389.149827 | 3444.926288 | -0.734943226 | 1.032539347  | 0.8300151 |
| <b>B7LFN5</b> | TY-2482_chromosome | + | 2275240 | 2278107 | 3385.322842 | 3832.006112 | 3549.361981 | 9197.423544 | 7152.04466  | 6362.766044 | -1.167153959 | 2.285816895  | 1.9264142 |
| <b>B7LFN8</b> | TY-2482_chromosome | + | 2278199 | 2278489 | 147.4772098 | 134.2030394 | 125.2152454 | 141.7116414 | 120.1311725 | 91.31864829 | 0.139276077  | 0.458183764  | 0.3497999 |
| <b>B7LFN9</b> | TY-2482_chromosome | + | 2278526 | 2278909 | 124.0078948 | 145.6954868 | 126.6370073 | 75.112519   | 73.76464281 | 53.09355697 | 0.881454235  | 5.526891183  | 4.8675455 |
| <b>B7LEP8</b> | TY-2482_chromosome | - | 2278835 | 2279983 | 289.285852  | 341.1763964 | 286.3428781 | 194.7613737 | 184.7936935 | 130.8234051 | 0.735317968  | 0.4089010903 | 3.5415995 |
| <b>Q6Q6S9</b> | TY-2482_chromosome | + | 2280048 | 2280536 | 96.57874999 | 83.39529259 | 90.42439089 | 104.6267097 | 88.21454488 | 94.77902645 | -0.076602081 | 0.158856852  | 0.1161967 |
| <b>P71290</b> | TY-2482_chromosome | - | 2280755 | 2281060 | 331.1678281 | 342.923257  | 371.2105319 | 524.2743321 | 399.3750381 | 532.5881838 | -0.467147624 | 1.634382756  | 1.3545239 |
| <b>B7LBU5</b> | TY-2482_chromosome | + | 2281131 | 2282651 | 1407.433917 | 1357.929226 | 1414.238842 | 2278.214632 | 2070.303893 | 2348.255549 | -0.664525891 | 2.582096017  | 2.1903914 |
| <b>Q327G0</b> | TY-2482_chromosome | + | 2282729 | 2283226 | 186.9969686 | 153.914098  | 202.3172592 | 234.4808642 | 232.0631032 | 222.4456859 | -0.282913787 | 1.011490592  | 0.8125917 |
| <b>B7LBW0</b> | TY-2482_chromosome | + | 2283382 | 2287497 | 6322.907272 | 6444.875177 | 6643.994712 | 7170.76068  | 5551.137579 | 8787.691302 | -0.111342112 | 0.153664639  | 0.1124438 |
| <b>B3IA48</b> | TY-2482_chromosome | - | 2287597 | 2287905 | 240.1401852 | 229.3410735 | 216.382205  | 196.1235799 | 201.9891233 | 239.1410084 | 0.131770542  | 0.216594236  | 0.1598511 |
| <b>Q5K5W0</b> | TY-2482_chromosome | - | 2287935 | 2288601 | 211.1481065 | 166.2582619 | 179.4590552 | 117.7246678 | 86.30938358 | 124.676823  | 0.805279202  | 3.579016392  | 3.0768252 |
| <b>D3GV17</b> | TY-2482_chromosome | + | 2288791 | 2289051 | 98.04025292 | 76.71448583 | 103.2404767 | 41.49817773 | 63.81070083 | 56.49352254 | 0.896932098  | 3.263164303  | 2.792466  |
| <b>B7LFP0</b> | TY-2482_chromosome | + | 2289085 | 2290695 | 239.4564656 | 224.0833688 | 201.0930913 | 170.2337603 | 143.7084468 | 167.0061719 | 0.449809367  | 1.638432793  | 1.3580299 |
| <b>B3I233</b> | TY-2482_chromosome | - | 2290887 | 2291489 | 144.1452422 | 193.1042803 | 138.2997458 | 119.6138594 | 99.23569026 | 57.39656012 | 0.58585447   | 2.866481928  | 2.4412135 |
| <b>B7LX19</b> | TY-2482_chromosome | - | 2291436 | 2292566 | 320.6979698 | 340.0463063 | 351.9991729 | 236.8890157 | 197.4581888 | 170.1248102 | 0.693393701  | 3.520764565  | 3.0242819 |
| <b>B7LBX6</b> | TY-2482_chromosome | + | 2292615 | 2292812 | 61.12591275 | 67.22748461 | 75.50849192 | 39.25437975 | 40.01364288 | 45.87614345 | 0.736136145  | 2.670970865  | 2.2695437 |
| <b>D3GV13</b> | TY-2482_chromosome | - | 2293092 | 2293496 | 297.685864  | 298.4856819 | 269.8281041 | 338.266126  | 272.102617  | 199.3262968 | -0.000982082 | 0.173464465  | 0.1280663 |
| <b>D3GV12</b> | TY-2482_chromosome | - | 2293884 | 2295035 | 555.3863027 | 668.923299  | 654.3972711 | 1045.1518   | 768.964248  | 558.5929902 | -0.4580769   | 0.852484122  | 0.678718  |
| <b>B7LWV5</b> | TY-2482_chromosome | - | 2295145 | 2295497 | 770.1166375 | 847.1751904 | 851.1157439 | 908.01091   | 821.7990568 | 642.5345546 | -0.004823893 | 0.10667913   | 0.0788787 |
| <b>D3GV09</b> | TY-2482_chromosome | - | 2295517 | 2296080 | 664.5418821 | 777.7250093 | 839.4371773 | 1124.939716 | 931.89008   | 720.2430203 | -0.353432682 | 0.76108783   | 0.6027124 |
| <b>D3GV08</b> | TY-2482_chromosome | - | 2296670 | 2296922 | 165.8747232 | 180.2175206 | 184.9620789 | 222.5271094 | 173.7701398 | 156.9501945 | -0.118209967 | 0.111949228  | 0.0820132 |
| <b>Q327G0</b> | TY-2482_chromosome | - | 2297829 | 2298326 | 284.8185215 | 288.9806246 | 317.7403889 | 413.4194877 | 339.3853059 | 348.7957564 | -0.317631081 | 0.866806702  | 0.6906203 |
| <b>B7LBU5</b> | TY-2482_chromosome | - | 2298404 | 2299924 | 1249.672187 | 1190.476946 | 1217.4402   | 2085.12754  | 1850.963112 | 2212.670222 | -0.73127735  | 3.597849406  | 3.0923186 |
| <b>P71290</b> | TY-2482_chromosome | + | 2299995 | 2300300 | 353.6806946 | 363.1431062 | 357.8165262 | 490.0160502 | 393.0148476 | 525.9479601 | -0.387163789 | 1.214147578  | 0.9860048 |
| <b>Q9S110</b> | TY-2482_chromosome | + | 2300218 | 2300586 | 744.8852266 | 688.5432722 | 741.4807575 | 958.9706936 | 774.3383393 | 979.9307267 | -0.295302963 | 0.976808578  | 0.7829945 |
| <b>B7LFP9</b> | TY-2482_chromosome | - | 2300519 | 2301089 | 3185.752269 | 3148.065453 | 3313.780658 | 3650.850425 | 3073.790469 | 3725.658693 | -0.104580108 | 0.128690856  | 0.0938336 |
| <b>B7LFP0</b> | TY-2482_chromosome | - | 2301520 | 2304066 | 3763.631283 | 4280.851253 | 4537.351067 | 6855.790704 | 4566.525377 | 4478.793433 | -0.413501296 | 0.427434869  | 0.3261975 |
| <b>B7LFP6</b> | TY-2482_chromosome | - | 2304073 | 2307483 | 2383.16779  | 2604.216137 | 2788.369869 | 4052.231123 | 3440.066174 | 1894.187132 | -0.373721207 | 0.327592007  | 0.246427  |
| <b>B7LFP2</b> | TY-2482_chromosome | - | 2307483 | 2308082 | 418.5055544 | 496.7786818 | 522.481547  | 637.5214947 | 508.7936131 | 230.1125432 | -0.078825973 | 0.087164705  | 0.0636258 |
| <b>B7LFP1</b> | TY-2482_chromosome | - | 2308070 | 2308381 | 275.6787402 | 336.6559386 | 332.2304399 | 493.9553492 | 337.6263532 | 172.1841642 | -0.256982611 | 0.125979761  | 0.0926664 |
| <b>B7LFP4</b> | TY-2482_chromosome | - | 2308412 | 2309839 | 947.2319393 | 1104.831157 | 1184.72474  | 1888.901595 | 1329.607822 | 619.598209  | -0.399564773 | 0.428373447  | 0.3268958 |
| <b>B7LFP5</b> | TY-2482_chromosome | - | 2309843 | 2310394 | 470.6983723 | 665.5612383 | 637.9925005 | 1178.182658 | 837.2553385 | 444.4973727 | -0.655127363 | 1.1140658    | 0.901071  |
| <b>B7LFP6</b> | TY-2482_chromosome | - | 2310402 | 2311475 | 1043.604716 | 1295.350582 | 1431.778064 | 2483.331329 | 1591.643735 | 882.6260539 | -0.54609026  | 0.83939827   | 0.6674738 |
| <b>B7LFP7</b> | TY-2482_chromosome | - | 2311482 | 2311784 | 390.6089768 | 525.3168004 | 627.1877491 | 921.3553424 | 659.7943816 | 358.9493752 | -0.455032387 | 0.650891074  | 0.5087413 |
| <b>B7LFP3</b> | TY-2482_chromosome | - | 2311791 | 2312255 | 490.1314123 | 663.7298488 | 704.8512203 | 1324.785838 | 926.4528045 | 428.8345453 | -0.699584733 | 1.224225283  | 0.9947933 |
| <b>B7LFP9</b> | TY-2482_chromosome | - | 2312269 | 2314248 | 1822.878651 | 2309.68417  | 2348.688025 | 3153.244634 | 2276.106493 | 803.9655231 | -0.137030197 | 0.057061718  | 0.0402795 |
| <b>B7LFR0</b> | TY-2482_chromosome | - | 2314264 | 2315220 | 775.3150517 | 880.4752001 | 876.2160342 | 967.092455  | 811.8626815 | 368.2433794 | 0.09624253   | 0.454904299  | 0.3473745 |
| <b>B7LFR1</b> | TY-2482_chromosome | - | 2315187 | 2316986 | 1735.570724 | 1875.200294 | 1963.678903 | 2292.157286 | 1908.422808 | 1166.54295  | -0.042007511 | 0.076858881  | 0.0557756 |
| <b>B7LFR2</b> | TY-2482_chromosome | - | 2316982 | 2317401 | 806.0946715 | 778.8019976 | 895.4941697 | 949.0864294 | 751.6953388 | 551.9459081 | 0.08671064   | 0.287430573  | 0.2148972 |
| <b>B7LFR3</b> | TY-2482_chromosome | - | 2317414 | 2317917 | 3165.976095 | 4074.055977 | 4148.506103 | 3427.022508 | 2664.627819 | 1855.814637 | 0.402270808  | 0.782562091  | 0.6208371 |
| <b>B7LFP8</b> | TY-2482_chromosome | - | 2317930 | 2319405 | 3694.132309 | 4038.914648 | 4300.296996 | 4246.704883 | 3149.66478  | 2250.501601 | 0.223960653  | 0.401531226  | 0.3048353 |
| <b>B7LFR5</b> | TY-2482_chromosome | - | 2319411 | 2319884 | 922.0091657 | 935.3081199 | 981.189176  | 798.5749218 | 578.8148577 | 291.9095393 | 0.635196115  | 2.518001407  | 2.1318886 |
| <b>P16943</b> | TY-2482_chromosome | + | 2320280 | 2321307 | 69.45130462 | 83.54176138 | 66.45356193 | 37.98207626 | 49.27612861 | 30.68178615 | 0.810280879  | 3.60023439   | 3.0940937 |
| <b>B7LFS0</b> | TY-2482_chromosome | + | 2321422 | 2321904 | 58.23845301 | 77.20720728 | 49.73702647 | 17.2478486  | 34.804003   | 18.74597782 | 1.286571885  | 5.693123524  | 5.0205496 |
| <b>D8EKF9</b> | TY-2482_chromosome | + | 2321982 | 2322591 | 110.5934627 | 132.2738319 | 102.7046577 | 112.6521992 | 124.8562081 | 56.17860314 | 0.086181443  | 0.437985068  | 0.3342233 |
| <b>B7LFS4</b> | TY-2482_chromosome | - | 2322628 | 2322948 | 78.92400808 | 109.3542969 | 101.7986825 | 59.38148897 | 61.06419418 | 36.13889916 | 0.780495879  | 3.641712581  | 3.1315861 |
| <b>B7LFS2</b> | TY-2482_chromosome | - | 2323017 | 2323658 | 100.8508399 | 122.0030958 | 96.13707512 | 92.91146308 | 77.31028758 | 75.1990634  | 0.278776979  | 1.081737586  | 0.8735641 |
| <b>B7LFS6</b> | TY-2482_chromosome | - | 2323682 | 2323987 | 102.500704  | 105.0601735 | 90.20122102 | 103.012491  | 65.3781271  | 82.93710001 | 0.175907523  | 0.54730192   | 0.4223632 |

|        |                    |   |         |         |             |             |             |             |             |             |              |             |           |
|--------|--------------------|---|---------|---------|-------------|-------------|-------------|-------------|-------------|-------------|--------------|-------------|-----------|
| D3GUYO | TY-2482_chromosome | - | 2324312 | 2324614 | 178.532948  | 200.7597567 | 209.454568  | 301.87619   | 341.3031815 | 327.5819429 | -0.711873044 | 3.448760163 | 2.9590739 |
| B7LFT1 | TY-2482_chromosome | - | 2324682 | 2326466 | 1206.149944 | 1287.747611 | 1288.154224 | 1691.072858 | 1534.275932 | 1793.011037 | -0.40695469  | 1.344142619 | 1.1006047 |
| B7LFT2 | TY-2482_chromosome | - | 2326663 | 2327826 | 717.0889735 | 757.1204629 | 747.3849417 | 922.0300645 | 772.5080895 | 1057.357651 | -0.296379647 | 0.919477438 | 0.7347851 |
| B7LG71 | TY-2482_chromosome | - | 2328009 | 2329367 | 1553.157164 | 1538.53251  | 1753.149731 | 1840.251068 | 1484.16758  | 1959.97929  | -0.09073906  | 0.260005004 | 0.1935021 |
| B7LG72 | TY-2482_chromosome | - | 2329392 | 2329910 | 648.9332228 | 698.3121785 | 768.7495788 | 594.5454285 | 468.558845  | 587.9221478 | 0.364468591  | 1.078753097 | 0.8708869 |
| E3PN47 | TY-2482_chromosome | - | 2330414 | 2330686 | 129.3307846 | 150.3489245 | 115.2014389 | 48.93133596 | 76.66720415 | 42.60073126 | 1.152115832  | 6.982738009 | 6.2297274 |
| B7LG74 | TY-2482_chromosome | - | 2330640 | 2330945 | 219.6231924 | 264.5141456 | 256.2545127 | 109.2694976 | 156.6836838 | 117.309532  | 0.936391112  | 5.151145258 | 4.517515  |
| B7LG70 | TY-2482_chromosome | - | 2330969 | 2331625 | 408.2466726 | 427.4441658 | 420.554452  | 261.195337  | 328.6656464 | 238.4965517 | 0.582747616  | 2.429045363 | 2.053679  |
| B7LG78 | TY-2482_chromosome | - | 2332861 | 2333427 | 61.72084344 | 38.21561602 | 46.72035312 | 14.64517979 | 27.45577238 | 18.55536175 | 1.375959372  | 4.934255504 | 4.3169371 |
| B7LG80 | TY-2482_chromosome | - | 2333677 | 2333877 | 98.72452424 | 104.8603812 | 88.89038043 | 27.92838924 | 42.00859227 | 27.90082999 | 1.544947405  | 10.16163453 | 9.2273834 |
| Q0TDJ8 | TY-2482_chromosome | - | 2334047 | 2334337 | 198.5930593 | 300.4662667 | 210.2983961 | 78.53947014 | 106.6225664 | 75.31087056 | 1.318678204  | 9.386354525 | 8.491185  |
| B7LG83 | TY-2482_chromosome | + | 2335220 | 2335816 | 44.93622919 | 39.43146691 | 42.90121622 | 30.76033956 | 33.69132832 | 31.6232248  | 0.435227642  | 0.920483667 | 0.7355    |
| B7LG85 | TY-2482_chromosome | + | 2337314 | 2338330 | 167.2517349 | 105.5361617 | 126.5915036 | 113.2716048 | 82.01368914 | 9.19762906  | 0.835551732  | 1.763921599 | 1.4669198 |
| B7LG82 | TY-2482_chromosome | + | 2339643 | 2342765 | 362.6728238 | 383.2445809 | 347.1239904 | 247.5017966 | 239.2980105 | 270.8541359 | 0.516984256  | 2.045777355 | 1.7117421 |
| B7LG88 | TY-2482_chromosome | + | 2342883 | 2345402 | 237.7488523 | 232.4867161 | 257.6349389 | 189.3912394 | 233.0109916 | 236.6365615 | 0.200062114  | 0.320591789 | 0.244729  |
| B7LG89 | TY-2482_chromosome | + | 2345481 | 2345933 | 94.85580436 | 112.120515  | 94.91355714 | 39.33829248 | 48.34275975 | 31.96344351 | 1.261329706  | 8.033297426 | 7.2113085 |
| Q5K5L6 | TY-2482_chromosome | - | 2347465 | 2348421 | 94.50795926 | 61.80493408 | 85.25926404 | 65.07906072 | 68.30231249 | 54.24487848 | 0.432025047  | 0.995408676 | 0.7986108 |
| B7LG96 | TY-2482_chromosome | + | 2349140 | 2349619 | 28.38081715 | 32.59391902 | 26.21868369 | 29.93221721 | 28.11420306 | 45.46116766 | -0.237252081 | 0.386581319 | 0.2933195 |
| B7LG97 | TY-2482_chromosome | + | 2349619 | 2350038 | 203.4666487 | 195.9172522 | 189.3637588 | 112.3961326 | 170.3195697 | 142.1019781 | 0.50482131   | 1.638767153 | 1.3581827 |
| B7LG90 | TY-2482_chromosome | + | 2350126 | 2350965 | 116.593611  | 105.5361617 | 106.6521824 | 35.12646575 | 58.48226803 | 29.47431901 | 1.469915512  | 9.4811391   | 8.5822159 |
| B7LG99 | TY-2482_chromosome | - | 2351252 | 2351785 | 81.28367831 | 117.9558731 | 79.53043533 | 16.51546493 | 19.93738785 | 37.27130983 | 1.905173103  | 10.49551297 | 9.5411753 |
| B7LGA0 | TY-2482_chromosome | - | 2351790 | 2352965 | 116.7943664 | 84.88177592 | 120.4300043 | 32.55747608 | 13.43101154 | 35.03838583 | 2.08221806   | 12.71242313 | 11.656222 |
| B7LGA1 | TY-2482_chromosome | - | 2352965 | 2353939 | 108.3683515 | 101.5517302 | 122.3822897 | 8.961818323 | 9.978824233 | 14.17975997 | 3.410031506  | 32.0603312  | 30.525581 |
| B7LGA8 | TY-2482_chromosome | - | 2353945 | 2354541 | 133.8308191 | 131.7510008 | 138.0284868 | 11.14300761 | 7.172616145 | 15.39826925 | 3.621225482  | 39.46625219 | 37.751389 |
| B7LGA2 | TY-2482_chromosome | - | 2354541 | 2354909 | 105.4089301 | 103.4655471 | 109.6533948 | 9.39932411  | 5.386922174 | 7.893235033 | 3.786989477  | 38.1176863  | 36.422128 |
| B7LGA4 | TY-2482_chromosome | - | 2354909 | 2355469 | 193.6457522 | 191.0492398 | 202.7602167 | 21.37337835 | 17.28478552 | 12.22354747 | 3.471182284  | 46.59189116 | 44.783804 |
| B7LGA5 | TY-2482_chromosome | - | 2355476 | 2355955 | 158.3793719 | 170.1667007 | 183.0583343 | 7.558262184 | 10.93169977 | 12.92616504 | 4.080442654  | 50.97891722 | 49.059934 |
| B7LGA3 | TY-2482_chromosome | - | 2355948 | 2357168 | 229.4173885 | 267.0122751 | 246.8940224 | 20.09296365 | 19.54157711 | 19.54157711 | 3.89067639   | 53.42269482 | 51.479353 |
| B7LGA7 | TY-2482_chromosome | - | 2357171 | 2358661 | 310.3167105 | 326.6842074 | 301.6000577 | 25.37332599 | 17.22323048 | 17.32498706 | 3.891878172  | 57.17770946 | 55.120424 |
| B7LGA8 | TY-2482_chromosome | - | 2358664 | 2360721 | 384.418177  | 383.6509563 | 359.0149651 | 30.9453457  | 24.48456747 | 32.72108567 | 3.666149598  | 52.36076109 | 50.425691 |
| B7LGA9 | TY-2482_chromosome | - | 2360754 | 2361710 | 86.17234517 | 72.94453066 | 74.46564827 | 19.20975348 | 12.63612796 | 19.57056546 | 2.198779682  | 15.69966143 | 14.533076 |
| B7LGB1 | TY-2482_chromosome | - | 2362207 | 2363013 | 274.4777009 | 263.1451802 | 269.3503994 | 23.45855634 | 31.96395989 | 21.33472342 | 3.391383961  | 46.79752369 | 44.977027 |
| B7LGB2 | TY-2482_chromosome | - | 2363156 | 2367784 | 2741.079264 | 2316.497967 | 2275.599621 | 300.4465926 | 235.6089422 | 267.1031893 | 3.18520899   | 43.21780135 | 41.45055  |
| B7LGB4 | TY-2482_chromosome | - | 2368255 | 2369934 | 43.98333235 | 63.78903263 | 37.83245409 | 35.02605448 | 19.8434488  | 39.04752094 | 0.506307923  | 1.452283007 | 1.1934754 |
| B7LGB5 | TY-2482_chromosome | - | 2370293 | 2372461 | 2877.508579 | 3144.998034 | 3274.245026 | 1341.206902 | 1046.426047 | 1382.461182 | 1.302545851  | 4.144584997 | 3.5921099 |
| B7LGB3 | TY-2482_chromosome | - | 2372486 | 2372887 | 612.1778604 | 703.393599  | 804.5482597 | 224.0100666 | 162.719142  | 263.8938805 | 1.741183782  | 13.38336478 | 12.29805  |
| B7LGB7 | TY-2482_chromosome | - | 2372895 | 2374115 | 413.3741834 | 463.3147795 | 466.2185244 | 232.0907914 | 199.2563138 | 198.8199655 | 1.05445502   | 7.041243934 | 6.2849883 |
| B7LGB8 | TY-2482_chromosome | - | 2374129 | 2375178 | 262.2673074 | 330.65172   | 282.4689317 | 29.90799476 | 22.70471793 | 21.29313664 | 3.458115329  | 48.25274652 | 46.399581 |
| B7LGB9 | TY-2482_chromosome | - | 2375181 | 2376677 | 467.1608022 | 528.0041294 | 568.7000809 | 43.08205129 | 38.24892583 | 25.51481494 | 3.805389138  | 55.61883205 | 53.631584 |
| C8UFR4 | TY-2482_chromosome | + | 2376928 | 2377689 | 76.32881122 | 65.61975611 | 77.34865991 | 88.69705639 | 112.1325073 | 57.30494025 | -0.240939711 | 0.476552239 | 0.3644889 |
| D3GVN3 | TY-2482_chromosome | - | 2377702 | 2378841 | 22.27205409 | 27.7078301  | 25.77734153 | 34.13041407 | 38.28183747 | 29.21214975 | -0.473099743 | 0.859584176 | 0.6848231 |
| B7LGC4 | TY-2482_chromosome | + | 2382124 | 2383293 | 50.95361628 | 50.97639238 | 41.28465843 | 40.29876384 | 62.03602345 | 44.92241998 | -0.057336037 | 0.04419683  | 0.0304699 |
| B7LGC5 | TY-2482_chromosome | - | 2383334 | 2384491 | 63.65182577 | 57.25436509 | 58.6819458  | 24.776356   | 31.00742416 | 25.13319814 | 1.166392506  | 5.485598141 | 4.8275534 |
| B7LGD2 | TY-2482_chromosome | - | 2390720 | 2392216 | 10.95737852 | 15.31144584 | 17.43215552 | 42.09985606 | 30.01045477 | 19.04152625 | -1.160905496 | 2.857943382 | 2.4338736 |
| B7LGD4 | TY-2482_chromosome | - | 2392511 | 2394367 | 1262.945613 | 1393.174336 | 1383.2446   | 3283.763092 | 2555.281408 | 3507.103859 | -1.21427388  | 3.403257276 | 2.9194235 |
| B7LGD5 | TY-2482_chromosome | + | 2394572 | 2395435 | 665.5372523 | 647.1373537 | 700.6084674 | 1193.981152 | 1020.978478 | 1270.65223  | -0.765091353 | 4.337524026 | 3.7050481 |
| D8EBP7 | TY-2482_chromosome | - | 2395432 | 2395821 | 240.1231711 | 222.0984279 | 228.3894356 | 305.2276679 | 314.857628  | 343.2137443 | -0.443695833 | 1.807474443 | 1.5034038 |
| B7LF78 | TY-2482_chromosome | + | 2395738 | 2396715 | 593.0791902 | 551.9055245 | 582.3307546 | 604.743977  | 524.9782597 | 731.0158865 | -0.059085826 | 0.212411234 | 0.1575077 |
| B7LGD3 | TY-2482_chromosome | - | 2396843 | 2397088 | 64.04847444 | 70.26009115 | 88.25008995 | 51.50525281 | 70.16483624 | 60.54866742 | 0.345634713  | 0.683804246 | 0.5362083 |
| B7LGD8 | TY-2482_chromosome | - | 2397104 | 2397442 | 105.5739418 | 91.05391699 | 96.32518722 | 85.636164   | 64.50635931 | 80.18159135 | 0.35890439   | 1.02640975  | 0.8250973 |
| B7LGD9 | TY-2482_chromosome | - | 2397438 | 2397923 | 260.3228163 | 225.392688  | 259.5647828 | 216.8845007 | 192.8879248 | 198.7361459 | 0.318390303  | 0.852548045 | 0.678718  |
| B7LGE0 | TY-2482_chromosome | - | 2397919 | 2398410 | 399.4798321 | 348.6845303 | 368.3513587 | 310.5536287 | 298.448382  | 339.2613342 | 0.274092626  | 0.624720107 | 0.4875578 |
| B7LGD7 | TY-2482_chromosome | - | 2398413 | 2400113 | 1084.371273 | 1025.877441 | 1103.973052 | 727.8078674 | 585.935297  | 741.8083063 | 0.665601547  | 3.045325675 | 2.6008239 |
| B7LGE2 | TY-2482_chromosome | - | 2400113 | 2401288 | 633.3220807 | 682.2076913 | 655.5793638 | 199.1239102 | 179.2975221 | 185.5611819 | 1.776737201  | 16.98262993 | 15.778129 |
| B7LGE3 | TY-2482_chromosome | - | 2401281 | 2402264 | 921.3211453 | 896.8434518 | 939.5501619 | 163.8606984 | 122.7457559 | 147.3313988 | 2.65908761   | 33.72022624 | 32.150786 |
| B7LGE4 | TY-2482_chromosome | - | 2402270 | 2403385 | 2230.845248 | 2112.652182 | 2162.892795 | 230.9757609 | 174.6424733 | 184.3703776 | 3.434818841  | 50.56699441 | 48.663524 |
| B7LGE5 | TY-2482_chromosome | - | 2403395 | 2403577 | 217.7292839 | 184.2349318 | 211.3339977 | 14.32870418 | 19.20115815 | 12.11232428 | 3.768358771  | 48.89896941 | 47.017775 |

|        |                    |   |         |         |             |             |             |             |             |             |              |             |           |
|--------|--------------------|---|---------|---------|-------------|-------------|-------------|-------------|-------------|-------------|--------------|-------------|-----------|
| B7LGE7 | TY-2482_chromosome | - | 2403983 | 2404906 | 66.25131709 | 91.19773929 | 81.25163333 | 90.25412791 | 79.15673513 | 71.31743812 | -0.10292661  | 0.030327319 | 0.0204139 |
| B7LGE1 | TY-2482_chromosome | + | 2405024 | 2406061 | 515.9634955 | 530.5336401 | 519.5634988 | 1986.29111  | 1586.135022 | 1720.917906 | -1.789980009 | 15.76124633 | 14.590451 |
| B7LGE9 | TY-2482_chromosome | - | 2406107 | 2406598 | 378.326339  | 423.9711821 | 366.9000544 | 437.6477896 | 588.0211868 | 477.7176514 | -0.388098897 | 1.091877473 | 0.8821645 |
| B7LGF0 | TY-2482_chromosome | + | 2406789 | 2407670 | 427.1018073 | 444.5251702 | 350.1690219 | 234.5089968 | 229.331285  | 218.5186883 | 0.779750732  | 4.307550254 | 3.7437227 |
| B7LGF1 | TY-2482_chromosome | - | 2407715 | 2408137 | 1885.354526 | 1729.205402 | 1857.265749 | 72.04889673 | 81.93728474 | 77.63457465 | 4.59549753   | 86.83740474 | 84.178059 |
| B7LGF2 | TY-2482_chromosome | - | 2408147 | 2408878 | 4915.467711 | 5154.043348 | 5069.268415 | 129.3579782 | 125.5622194 | 131.5370285 | 5.284353313  | 35.21642488 | 33.590503 |
| B7LGF4 | TY-2482_chromosome | + | 2409130 | 2410314 | 378.2477754 | 412.0342193 | 424.6432023 | 581.2621942 | 492.2352844 | 619.4159064 | -0.473458992 | 1.726619533 | 1.4363041 |
| B7LGF5 | TY-2482_chromosome | + | 2410457 | 2411113 | 1003.514073 | 1124.576255 | 976.9580256 | 481.7015027 | 604.3599058 | 532.8835496 | 0.915654106  | 5.722788328 | 5.048608  |
| B7LGE8 | TY-2482_chromosome | - | 2411159 | 2412112 | 183.8078374 | 241.9800216 | 169.9385391 | 107.3454922 | 90.05060423 | 88.34089377 | 0.925658418  | 6.0735818   | 5.378024  |
| B7LGF6 | TY-2482_chromosome | + | 2412249 | 2413409 | 1038.893243 | 907.6200263 | 950.0019316 | 947.492621  | 847.1400664 | 1184.856542 | 0.019250524  | 0.073353968 | 0.052797  |
| B7LGF8 | TY-2482_chromosome | + | 2413517 | 2414341 | 614.7077236 | 598.0487664 | 626.5978154 | 905.3672313 | 910.8983913 | 1132.348669 | -0.632493899 | 3.231302266 | 2.7650362 |
| B7LGF7 | TY-2482_chromosome | + | 2414544 | 2415467 | 79.4797782  | 78.77529889 | 54.91739932 | 48.59876704 | 57.4432458  | 37.28445513 | 0.482665795  | 1.632240067 | 1.352641  |
| B7LGG0 | TY-2482_chromosome | + | 2415521 | 2415775 | 23.76436701 | 30.10341819 | 27.06924536 | 35.65979037 | 29.99084417 | 30.37880472 | -0.309447213 | 0.394145407 | 0.2987552 |
| B7LGG1 | TY-2482_chromosome | - | 2415824 | 2418040 | 668.6476231 | 646.5053661 | 601.9397912 | 1284.105195 | 1462.42415  | 1765.094898 | -1.19189471  | 8.101774995 | 7.2704444 |
| B7LGF9 | TY-2482_chromosome | - | 2418154 | 2419563 | 953.7305383 | 827.3857092 | 780.7830946 | 1171.527554 | 1063.762849 | 1331.097085 | -0.451000778 | 1.661485234 | 1.3778032 |
| B7LGG3 | TY-2482_chromosome | - | 2419641 | 2420375 | 743.5600611 | 680.0103058 | 595.8379059 | 652.3425489 | 823.6512706 | 812.8977338 | -0.158269018 | 0.417350185 | 0.3181504 |
| B7LGG5 | TY-2482_chromosome | - | 2420611 | 2422866 | 1750.754361 | 1648.950482 | 1657.772345 | 2846.99207  | 2516.221531 | 2863.997591 | -0.694582003 | 1.491545882 | 1.228574  |
| D3GVS6 | TY-2482_chromosome | + | 2422962 | 2423171 | 66.53809459 | 58.05550781 | 73.5147842  | 46.57072535 | 58.37729568 | 35.99197817 | 0.515602846  | 1.388204434 | 1.1386229 |
| D7YH50 | TY-2482_chromosome | - | 2423197 | 2423412 | 106.9142299 | 94.19945108 | 119.1047119 | 109.7981172 | 111.0669892 | 89.79381849 | 0.069731237  | 0.084789416 | 0.0622325 |
| B7LGG6 | TY-2482_chromosome | - | 2423415 | 2423894 | 244.4877893 | 240.113908  | 260.9029704 | 330.937793  | 344.9273821 | 325.050495  | -0.409623607 | 1.451116192 | 1.1928263 |
| B7LGG7 | TY-2482_chromosome | - | 2423950 | 2424339 | 1277.120098 | 1495.589506 | 1384.482357 | 1670.496697 | 2147.878703 | 1529.148921 | -0.406099787 | 1.082835009 | 0.8745078 |
| B7LGG8 | TY-2482_chromosome | + | 2424491 | 2425147 | 216.8362583 | 219.0513658 | 219.8463923 | 194.485648  | 187.4679017 | 176.4491748 | 0.216362086  | 0.612524545 | 0.4778386 |
| B7LGG9 | TY-2482_chromosome | + | 2425147 | 2426493 | 342.422593  | 372.9200047 | 346.5378903 | 320.720062  | 235.5544655 | 324.7043837 | 0.244111777  | 0.696299026 | 0.5469619 |
| B7LGH1 | TY-2482_chromosome | + | 2427193 | 2427771 | 285.8857529 | 260.1622772 | 226.7660451 | 242.777901  | 254.7199458 | 354.6387441 | -0.132195309 | 0.36870962  | 0.2791082 |
| B7LGH2 | TY-2482_chromosome | + | 2427805 | 2428116 | 1415.806203 | 1257.718808 | 1272.148188 | 1008.109103 | 1583.678102 | 1228.905221 | 0.094912601  | 0.080148786 | 0.0582929 |
| B7LGH0 | TY-2482_chromosome | - | 2428170 | 2430059 | 1461.215686 | 1552.764432 | 1453.739474 | 3330.937988 | 2955.765544 | 3530.917301 | -1.147536841 | 2.919342325 | 2.4878834 |
| B7LGH4 | TY-2482_chromosome | - | 2430091 | 2430669 | 692.2230271 | 518.9557821 | 486.1673083 | 1155.447767 | 935.441975  | 1064.326553 | -0.886958185 | 4.785799613 | 4.1779924 |
| B7LGH3 | TY-2482_chromosome | - | 2430672 | 2431496 | 1600.799379 | 1135.462814 | 1268.797119 | 3010.61782  | 2683.699675 | 2735.262206 | -1.032510362 | 3.949861451 | 3.4130593 |
| B7LGH6 | TY-2482_chromosome | - | 2431524 | 2431943 | 515.5202975 | 415.9825985 | 436.9247023 | 734.1530077 | 738.0384098 | 759.0805458 | -0.667121694 | 3.234519707 | 2.7671837 |
| B7LGH7 | TY-2482_chromosome | - | 2431947 | 2432573 | 366.4852147 | 360.5657779 | 339.8683703 | 449.1326546 | 421.290514  | 495.7744892 | -0.350728623 | 1.095944791 | 0.8853055 |
| B7LGH5 | TY-2482_chromosome | + | 2432778 | 2434256 | 5785.291919 | 5577.07817  | 5753.283076 | 10231.09016 | 8948.430594 | 11640.2124  | -0.818331171 | 1.542126109 | 1.2717693 |
| C8TWX3 | TY-2482_chromosome | + | 2434407 | 2435075 | 2633.086298 | 2637.950991 | 2751.255744 | 3334.181188 | 2862.909754 | 3762.311413 | -0.28554516  | 0.41812131  | 0.3185626 |
| B7LGI0 | TY-2482_chromosome | + | 2435084 | 2436241 | 3886.553825 | 3796.859951 | 3687.963993 | 5031.971015 | 4061.439573 | 5212.232919 | -0.330563345 | 0.433001062 | 0.3303197 |
| B7LGH8 | TY-2482_chromosome | - | 2436285 | 2437097 | 177.7961531 | 224.8240349 | 182.0272793 | 156.8335465 | 153.7530971 | 177.4055858 | 0.210439367  | 0.687650206 | 0.5396531 |
| B7LGI2 | TY-2482_chromosome | + | 2437213 | 2437983 | 1039.325794 | 1143.474381 | 1168.723763 | 546.1885289 | 630.227693  | 569.7446745 | 0.941848202  | 5.944562294 | 5.2595983 |
| B7LGI3 | TY-2482_chromosome | - | 2438047 | 2438238 | 426.6781637 | 560.1589891 | 525.6454964 | 14.4347789  | 11.76239994 | 16.90799992 | 5.099593051  | 75.05272351 | 72.735801 |
| B7LGI1 | TY-2482_chromosome | - | 2438478 | 2439128 | 1037.460631 | 841.2281652 | 938.8228453 | 981.8945681 | 843.5294455 | 1007.604181 | 0.037531002  | 0.011572005 | 0.007653  |
| D3GVV8 | TY-2482_chromosome | + | 2439442 | 2439789 | 619.3455096 | 612.3784661 | 502.7039848 | 275.5173907 | 332.2259947 | 310.473494  | 0.901835667  | 4.989664365 | 4.3673466 |
| B7LGY2 | TY-2482_chromosome | + | 2443957 | 2445018 | 50.69690875 | 54.37169603 | 60.26937495 | 12.47022282 | 30.22375207 | 21.07522523 | 1.441679256  | 6.017460696 | 5.323787  |
| B7LGY3 | TY-2482_chromosome | - | 2445067 | 2445264 | 271.3459091 | 322.958293  | 262.527099  | 49.35563989 | 110.5994069 | 31.23915464 | 2.071875089  | 12.78414853 | 11.724686 |
| B7LGY5 | TY-2482_chromosome | + | 2445533 | 2446159 | 84.53417048 | 93.91226175 | 70.26249893 | 127.9470959 | 154.8232878 | 113.5018871 | -0.749082779 | 2.791396374 | 2.3755848 |
| B7LGY6 | TY-2482_chromosome | + | 2446189 | 2447847 | 149.4755128 | 161.8855055 | 154.4562767 | 231.1974083 | 212.9011917 | 235.4205728 | -0.560265206 | 2.172757979 | 1.8425302 |
| D3QRZ7 | TY-2482_chromosome | + | 2447869 | 2448198 | 88.50873276 | 70.52180811 | 70.41774128 | 22.73081595 | 72.33831919 | 29.48300491 | 0.939681494  | 2.348820901 | 1.9820402 |
| rygD   | TY-2482_chromosome | - | 2448074 | 2448223 | 75.85165977 | 53.24729142 | 60.59632797 | 21.52914503 | 65.07273234 | 21.73211129 | 0.876181359  | 1.879666971 | 1.5672608 |
| D3QRZ7 | TY-2482_chromosome | + | 2448185 | 2448574 | 161.1362782 | 117.5935803 | 127.8992058 | 198.6458526 | 236.6464799 | 237.9958747 | -0.650607992 | 3.309324345 | 2.8341021 |
| rygD   | TY-2482_chromosome | - | 2448451 | 2448599 | 160.3244743 | 129.7081282 | 126.4998685 | 210.5017438 | 250.3076847 | 242.0137838 | -0.712418531 | 3.57974473  | 3.077251  |
| B7LGY7 | TY-2482_chromosome | - | 2448647 | 2450077 | 1400.497433 | 1668.035564 | 1527.747638 | 2755.572623 | 2318.679425 | 3249.113623 | -0.868558534 | 2.230594742 | 1.877245  |
| B7LGY4 | TY-2482_chromosome | - | 2450128 | 2452965 | 1417.820257 | 1542.26596  | 1418.073946 | 1928.878193 | 1412.212389 | 2253.087364 | -0.355939468 | 0.984610775 | 0.7896056 |
| B7LGY8 | TY-2482_chromosome | - | 2452991 | 2454289 | 149.0865442 | 943.7510674 | 825.8802659 | 1019.822633 | 779.7249425 | 1307.008361 | 0.191917576  | 0.80670316  | 0.641372  |
| D8E4T8 | TY-2482_chromosome | - | 2454298 | 2454537 | 713.0433341 | 103.3806913 | 99.52612688 | 280.8264886 | 304.8591688 | 330.0308334 | -1.505600844 | 12.76354741 | 11.705175 |
| B7LGZ0 | TY-2482_chromosome | + | 2454531 | 2455148 | 377.2275178 | 297.4564943 | 302.1549312 | 1600.310119 | 1443.236014 | 1929.574239 | -2.287807156 | 27.42919358 | 25.987332 |
| B7LGZ2 | TY-2482_chromosome | + | 2455215 | 2456450 | 1437.310699 | 1412.005813 | 1491.532284 | 1894.515592 | 1824.589979 | 2183.641555 | -0.408221215 | 1.529334154 | 1.2603937 |
| B7LGZ1 | TY-2482_chromosome | - | 2456619 | 2457437 | 569.6869084 | 635.8315211 | 629.9227899 | 660.9690812 | 715.2623772 | 860.0139209 | -0.256204516 | 0.793293962 | 0.6301859 |
| B7LGZ4 | TY-2482_chromosome | - | 2457531 | 2457896 | 126.1192044 | 165.7764585 | 143.2211406 | 122.3136489 | 109.1693015 | 110.6105562 | 0.271211595  | 1.028771894 | 0.8270054 |
| B7LGZ5 | TY-2482_chromosome | + | 2458001 | 2458615 | 287.4884957 | 213.0609325 | 240.880143  | 215.0099275 | 306.859859  | 222.6244104 | 0.056504284  | 0.003159318 | 0.001252  |
| B7LGZ3 | TY-2482_chromosome | - | 2458634 | 2459563 | 305.4646354 | 428.4344918 | 394.9400366 | 32.93905773 | 28.15991682 | 31.56581808 | 3.541487753  | 46.91466337 | 45.085634 |
| B7LGZ6 | TY-2482_chromosome | + | 2461332 | 2462792 | 75.51177621 | 86.199512   | 66.36671    | 98.32491107 | 95.48973269 | 120.696683  | -0.493995074 | 1.572235319 | 1.3004575 |

|               |                    |   |         |         |             |             |             |             |              |             |              |             |           |
|---------------|--------------------|---|---------|---------|-------------|-------------|-------------|-------------|--------------|-------------|--------------|-------------|-----------|
| <b>B7LGG9</b> | TY-2482_chromosome | - | 2462841 | 2463851 | 628.8831841 | 641.4252211 | 641.7401171 | 1184.155164 | 1043.755417  | 1201.043772 | -0.843881385 | 4.999525865 | 4.3760101 |
| <b>Q1R6R6</b> | TY-2482_chromosome | - | 2463863 | 2464146 | 2265.048603 | 2600.644329 | 2380.736665 | 1645.657931 | 3027.12643   | 1964.539622 | 0.12320684   | 0.140166792 | 0.1032424 |
| <b>B7LH01</b> | TY-2482_chromosome | + | 2464088 | 2464300 | 3787.623676 | 4354.933815 | 4124.484703 | 3243.467891 | 5910.159104  | 3936.609974 | -0.08810505  | 0.093953709 | 0.0687829 |
| <b>B7LH02</b> | TY-2482_chromosome | + | 2464414 | 2466156 | 1602.574658 | 1668.847364 | 1588.439966 | 2352.886621 | 2381.571481  | 2657.350663 | -0.59971608  | 1.663053963 | 1.3790061 |
| <b>B7LH00</b> | TY-2482_chromosome | + | 2466354 | 2468192 | 4792.867396 | 4667.932478 | 4992.115084 | 8469.073744 | 7053.668217  | 10171.82887 | -0.784814169 | 1.494965968 | 1.2312961 |
| <b>B7LH04</b> | TY-2482_chromosome | - | 2468276 | 2468779 | 383.6157521 | 381.455417  | 388.2177437 | 209.2878103 | 238.4744501  | 223.6821562 | 0.79540094   | 3.940564582 | 3.4047439 |
| <b>B7LH05</b> | TY-2482_chromosome | - | 2469036 | 2469797 | 435.2796716 | 410.1026405 | 425.1731456 | 59.6196168  | 66.46423816  | 61.88626886 | 2.774801193  | 35.84569572 | 34.203383 |
| <b>B7LH06</b> | TY-2482_chromosome | + | 2470074 | 2470694 | 425.7420521 | 341.5031241 | 378.9193649 | 237.0526913 | 192.7920043  | 281.0764864 | 0.757590652  | 2.907222601 | 2.4773028 |
| <b>B7LH07</b> | TY-2482_chromosome | - | 2470854 | 2472371 | 305.015426  | 346.6765982 | 302.2243985 | 313.2238176 | 251.9351866  | 377.0678473 | 0.005190791  | 0.025752983 | 0.0173944 |
| <b>D6JEV2</b> | TY-2482_chromosome | + | 2472647 | 2472850 | 31.17937687 | 46.61745769 | 33.48570876 | 31.73767692 | 31.90937489  | 20.20064322 | 0.253759056  | 0.701013972 | 0.5504673 |
| <b>B7LH08</b> | TY-2482_chromosome | + | 2472789 | 2474165 | 341.9479998 | 282.0882327 | 309.603297  | 560.743533  | 594.2819992  | 569.7118346 | -0.844554623 | 4.841470971 | 4.2301785 |
| <b>A1AFZ4</b> | TY-2482_chromosome | + | 2474152 | 2474559 | 42.78194537 | 38.72615838 | 34.06990481 | 48.56435204 | 58.35466468  | 38.57423634 | -0.367148409 | 0.699394852 | 0.5493862 |
| <b>B7LH10</b> | TY-2482_chromosome | + | 2474761 | 2475741 | 459.9807289 | 393.1024511 | 474.8875894 | 126.4164046 | 147.4437236  | 155.0575109 | 1.712701065  | 13.85186811 | 12.751231 |
| <b>B7LH11</b> | TY-2482_chromosome | + | 2475928 | 2479017 | 121.4901198 | 72.71060343 | 109.7539977 | 214.2461615 | 107.1457313  | 174.8629428 | -0.63617514  | 2.332914078 | 1.9691355 |
| <b>B7LH09</b> | TY-2482_chromosome | + | 2479529 | 2480959 | 28.23430524 | 33.28507853 | 34.46623031 | 47.36782423 | 33.52571065  | 54.84964735 | -0.489198917 | 1.209109847 | 0.9814496 |
| <b>B7LH14</b> | TY-2482_chromosome | + | 2481096 | 2482163 | 27.31689054 | 42.30834313 | 38.43584336 | 26.02546225 | 17.21200327  | 18.5947429  | 0.697190624  | 2.005605041 | 1.6764702 |
| <b>B7LH15</b> | TY-2482_chromosome | + | 2482183 | 2484531 | 113.0526869 | 107.9912533 | 94.12598344 | 74.29914061 | 70.97702476  | 67.23512557 | 0.534702975  | 2.240022351 | 1.8849518 |
| <b>B7LH13</b> | TY-2482_chromosome | + | 2484860 | 2486875 | 78.33876763 | 89.82123784 | 90.55565725 | 200.7681466 | 175.6531003  | 134.7214426 | -1.052696556 | 5.451101364 | 4.7956469 |
| <b>E6ARB5</b> | TY-2482_chromosome | - | 2486926 | 2487348 | 110.5040669 | 111.7027893 | 137.6883899 | 87.21478787 | 98.33316701  | 86.95448397 | 0.439555126  | 1.31751572  | 1.0772102 |
| <b>B7LH19</b> | TY-2482_chromosome | - | 2487613 | 2488746 | 207.6822837 | 261.1436035 | 223.0479164 | 422.2947072 | 385.40013624 | 437.9810182 | -0.901422528 | 4.41069825  | 3.8401972 |
| <b>D3GWQ3</b> | TY-2482_chromosome | + | 2488795 | 2489331 | 168.2458977 | 182.0016552 | 154.9190832 | 94.95576221 | 111.9753091  | 107.83995   | 0.662689498  | 3.234034866 | 2.7670511 |
| <b>B7LH21</b> | TY-2482_chromosome | + | 2489411 | 2490091 | 42.58227604 | 48.0731083  | 40.09148971 | 49.83315381 | 29.90180231  | 36.96422611 | 0.072157257  | 0.235975475 | 0.1749825 |
| <b>B7LH22</b> | TY-2482_chromosome | + | 2490155 | 2491156 | 552.5826533 | 591.9522318 | 553.1850705 | 1713.624276 | 1355.861973  | 1669.385365 | -1.508941318 | 11.54184757 | 10.542418 |
| <b>sraF</b>   | TY-2482_chromosome | + | 2491236 | 2491423 | 175.2269712 | 132.6255885 | 48.1665125  | 94.43115177 | 134.0225503  | 66.5088981  | 0.139845523  | 0.388840464 | 0.2951676 |
| <b>B7LH23</b> | TY-2482_chromosome | + | 2491442 | 2492404 | 133.054566  | 148.4325127 | 127.2312069 | 91.68811187 | 110.1737166  | 100.0262298 | 0.409679004  | 1.501594685 | 1.2367007 |
| <b>B7LH24</b> | TY-2482_chromosome | + | 2492806 | 2494047 | 762.0420109 | 765.0037376 | 743.3448396 | 377.5712037 | 383.1306202  | 378.9301792 | 0.988995806  | 5.911031046 | 5.2229613 |
| <b>B7LH25</b> | TY-2482_chromosome | - | 2494058 | 2494606 | 28.78133729 | 51.20664661 | 37.56789502 | 34.74944042 | 35.48810629  | 35.53424371 | 0.037188336  | 0.180431115 | 0.1333394 |
| <b>B7LH26</b> | TY-2482_chromosome | - | 2494692 | 2496176 | 365.7795291 | 310.5926557 | 366.5532003 | 791.7619943 | 580.4860924  | 701.2104028 | -0.967575461 | 5.650979862 | 4.9824169 |
| <b>B7LH20</b> | TY-2482_chromosome | - | 2496194 | 2497603 | 482.267215  | 497.2898943 | 515.0526795 | 1093.317192 | 759.7526291  | 919.6550615 | -0.921135234 | 4.66679286  | 4.0700292 |
| <b>B7LH28</b> | TY-2482_chromosome | + | 2497966 | 2499381 | 256.1377394 | 170.0580972 | 217.2116736 | 297.5328204 | 285.7354249  | 289.4748615 | -0.361517868 | 1.430391009 | 1.1760142 |
| <b>B7LH29</b> | TY-2482_chromosome | - | 2499475 | 2500560 | 76.15146942 | 100.5063601 | 68.93912163 | 26.69033821 | 36.5076323   | 26.52711141 | 1.349661386  | 7.763576261 | 6.9621659 |
| <b>B7LH30</b> | TY-2482_chromosome | - | 2500560 | 2503259 | 64.32488495 | 73.21480031 | 53.76796937 | 43.42839245 | 50.16835522  | 29.4780045  | 0.523117362  | 1.858880132 | 1.5492005 |
| <b>B7LH27</b> | TY-2482_chromosome | - | 2503336 | 2503833 | 47.64148887 | 67.2865427  | 49.9748094  | 58.40226778 | 71.10706006  | 46.49291023 | -0.212497598 | 0.171109315 | 0.1265093 |
| <b>B7LH33</b> | TY-2482_chromosome | + | 2504875 | 2505648 | 1820.972651 | 1810.9684   | 1816.278015 | 875.8977624 | 1009.313982  | 880.2937055 | 0.981842332  | 5.687419489 | 5.0152931 |
| <b>B7LH34</b> | TY-2482_chromosome | + | 2505996 | 2506655 | 939.1257019 | 1088.557699 | 986.3105425 | 597.3078384 | 789.1577044  | 601.5059829 | 0.567884835  | 2.550677396 | 2.1610781 |
| <b>B7LH35</b> | TY-2482_chromosome | + | 2506662 | 2507042 | 473.4545059 | 448.4743327 | 438.9353387 | 368.7487611 | 497.0393762  | 372.5980091 | 0.143350358  | 0.28344869  | 0.2117018 |
| <b>D3GWR6</b> | TY-2482_chromosome | + | 2507177 | 2507557 | 2791.641924 | 2692.458259 | 2966.564805 | 4790.240669 | 3934.032344  | 5133.244296 | -0.681504242 | 1.290747694 | 1.0523475 |
| <b>B7LH37</b> | TY-2482_chromosome | + | 2507598 | 2507900 | 3125.213544 | 3027.047984 | 3156.60555  | 6653.410508 | 5504.793742  | 6855.467782 | -1.015920079 | 2.227351603 | 1.8742165 |
| <b>B7LH36</b> | TY-2482_chromosome | + | 2507906 | 2508307 | 3019.037714 | 2875.194597 | 3028.522766 | 7307.582525 | 6008.062876  | 7101.594929 | -1.185843992 | 2.818919623 | 2.3991237 |
| <b>B7LH39</b> | TY-2482_chromosome | + | 2508300 | 2508596 | 2057.316927 | 1999.149472 | 2023.586842 | 3623.191236 | 3386.258988  | 3633.68788  | -0.802503258 | 1.647670067 | 1.3659949 |
| <b>D3GWS0</b> | TY-2482_chromosome | + | 2508695 | 2509174 | 166.7526932 | 181.8756948 | 151.5902125 | 126.9617842 | 137.3488261  | 188.8311466 | 0.161372781  | 0.291160798 | 0.2177269 |
| <b>B7LH38</b> | TY-2482_chromosome | + | 2509247 | 2510230 | 192.969998  | 176.0830138 | 195.5039637 | 292.8226685 | 251.9654017  | 349.5186488 | -0.607140873 | 2.827219384 | 2.0642216 |
| <b>B7LH42</b> | TY-2482_chromosome | + | 2510526 | 2510886 | 955.4970258 | 1091.943738 | 1149.674325 | 664.7806636 | 881.0121226  | 826.1102368 | 0.461850712  | 1.518378757 | 1.2510262 |
| <b>E1U309</b> | TY-2482_chromosome | + | 2511001 | 2511695 | 250.4794495 | 259.9763869 | 250.8302958 | 114.5302524 | 146.5809321  | 139.3720941 | 0.945842207  | 5.222965585 | 4.5823204 |
| <b>B7LH41</b> | TY-2482_chromosome | - | 2511745 | 2512638 | 649.6776494 | 743.8527154 | 729.6226347 | 335.3675841 | 353.0790777  | 390.534965  | 0.981587329  | 5.790995082 | 5.1111978 |
| <b>B7LH45</b> | TY-2482_chromosome | + | 2512743 | 2513441 | 95.57025681 | 114.7336464 | 99.58714302 | 136.0377237 | 123.7260561  | 130.2684222 | -0.386076645 | 1.040903727 | 0.8373163 |
| <b>B7LH44</b> | TY-2482_chromosome | - | 2513695 | 2515002 | 464.9395562 | 572.9624325 | 501.6891353 | 474.668153  | 3228.720508  | 4083.586243 | -3.006656334 | 15.29573993 | 14.149612 |
| <b>B7LH48</b> | TY-2482_chromosome | - | 2515033 | 2516298 | 842.7694061 | 888.2201206 | 826.498035  | 2802.444286 | 2662.819562  | 2360.495677 | -1.660304165 | 14.08866912 | 12.978327 |
| <b>B7LH49</b> | TY-2482_chromosome | - | 2516639 | 2518000 | 67.93809462 | 74.45015972 | 73.31090627 | 2497.866723 | 1708.895596  | 2478.332422 | -4.970176709 | 77.07911622 | 74.675043 |
| <b>B7LH50</b> | TY-2482_chromosome | - | 2518075 | 2518461 | 37.35071255 | 40.71423454 | 36.19435113 | 2074.794868 | 1471.369301  | 2242.695064 | -5.678560086 | 95.27300444 | 92.458757 |
| <b>B7LH51</b> | TY-2482_chromosome | - | 2518478 | 2520769 | 170.8349316 | 238.2767046 | 235.2902158 | 11164.42181 | 8503.355931  | 12625.4931  | -5.665971064 | 32.22183658 | 30.679762 |
| <b>B7LH47</b> | TY-2482_chromosome | - | 2520806 | 2522023 | 119.9299512 | 169.2144954 | 183.3164952 | 3299.398648 | 2675.408665  | 3802.999304 | -4.366405815 | 63.98031791 | 61.826122 |
| <b>B7LH53</b> | TY-2482_chromosome | - | 2522040 | 2523368 | 423.2005872 | 407.9031479 | 471.6270188 | 4989.440436 | 3495.331902  | 5045.077205 | -3.346906423 | 17.40421449 | 16.188914 |
| <b>B7LH54</b> | TY-2482_chromosome | - | 2523393 | 2524379 | 521.0396876 | 582.0014982 | 608.9044814 | 4730.39116  | 2524.299116  | 2659.400245 | -2.638979965 | 16.1855884  | 15.004809 |
| <b>B7LH55</b> | TY-2482_chromosome | - | 2524481 | 2525416 | 332.6060389 | 407.9577321 | 343.1576257 | 1728.121383 | 1387.861957  | 838.9871867 | -2.030028603 | 14.34640737 | 13.228641 |
| <b>B7LH57</b> | TY-2482_chromosome | + | 2526766 | 2527950 | 7.365470148 | 6.187552276 | 10.83715164 | 48.56434319 | 35.58128483  | 2.264539906 | -1.929014317 | 3.335958266 | 2.8567385 |
| <b>B7LF78</b> | TY-2482_chromosome | + | 2528291 | 2529268 | 523.3521984 | 566.4920021 | 569.8421308 | 592.9447693 | 495.8389578  | 721.757907  | -0.101793988 | 0.252223451 | 0.1876018 |

|               |                    |   |         |         |             |             |             |             |             |             |              |             |           |
|---------------|--------------------|---|---------|---------|-------------|-------------|-------------|-------------|-------------|-------------|--------------|-------------|-----------|
| <b>A1AG32</b> | TY-2482_chromosome | + | 2529684 | 2530211 | 177432.3358 | 169213.2577 | 165745.2444 | 70623.33694 | 189992.1461 | 56191.0907  | 0.687523299  | 0.813616646 | 0.6474501 |
| <b>rrpB</b>   | TY-2482_chromosome | - | 2529733 | 2530109 | 177387.4656 | 169154.0144 | 165685.8232 | 70583.93317 | 189946.6438 | 56139.78225 | 0.687671576  | 0.814354602 | 0.6478336 |
| <b>B7LH60</b> | TY-2482_chromosome | - | 2530145 | 2531368 | 734.1422789 | 809.0640336 | 906.8009232 | 580.5030539 | 466.7020559 | 703.3132072 | 0.527865941  | 1.637036901 | 1.3568154 |
| <b>B7LH61</b> | TY-2482_chromosome | - | 2531387 | 2532274 | 1031.725864 | 1243.549093 | 1273.131653 | 770.5397151 | 544.9388579 | 831.0495729 | 0.718801587  | 3.309986677 | 2.8344801 |
| <b>B7LH62</b> | TY-2482_chromosome | - | 2532307 | 2533074 | 870.2014406 | 1037.577587 | 1071.767723 | 529.103431  | 359.3073617 | 482.7073704 | 1.08714697   | 6.791520948 | 6.0491554 |
| <b>B7LH59</b> | TY-2482_chromosome | - | 2533093 | 2534424 | 971.1906314 | 1239.775853 | 1059.568669 | 277.9659855 | 172.6719878 | 329.5283314 | 2.031876837  | 17.67847195 | 16.455289 |
| <b>B7LH63</b> | TY-2482_chromosome | + | 2534798 | 2536366 | 1898.636053 | 1934.98445  | 2154.55459  | 962.5827451 | 687.8681585 | 820.9798204 | 1.265371416  | 8.655723094 | 7.7950281 |
| <b>D7ZZI1</b> | TY-2482_chromosome | + | 2536464 | 2536850 | 194.9666796 | 223.7989797 | 230.5783241 | 197.6426922 | 213.913989  | 181.7830727 | 0.110090065  | 0.277670984 | 0.2078281 |
| <b>B7LH64</b> | TY-2482_chromosome | + | 2536853 | 2537314 | 245.0997761 | 265.5307245 | 291.3904981 | 233.5244158 | 202.9310091 | 174.0457326 | 0.358115218  | 1.25019037  | 1.0176812 |
| <b>B7LH66</b> | TY-2482_chromosome | - | 2537375 | 2538181 | 457.4388631 | 537.7686077 | 536.8931272 | 324.407913  | 313.9398115 | 330.1862731 | 0.645678067  | 2.916566308 | 2.485621  |
| <b>B7LH67</b> | TY-2482_chromosome | + | 2538430 | 2539707 | 80.21216318 | 60.89554269 | 72.62643334 | 43.98807064 | 39.98786455 | 47.23092377 | 0.76790446   | 2.611600834 | 2.2151807 |
| <b>B7LH71</b> | TY-2482_chromosome | + | 2540980 | 2541861 | 50.59885188 | 63.7062651  | 62.85809268 | 34.41070597 | 41.85662123 | 49.64979591 | 0.517466693  | 1.34766901  | 1.1035943 |
| <b>B7LH68</b> | TY-2482_chromosome | + | 2541882 | 2542313 | 39.99780195 | 58.20104903 | 58.36506553 | 43.85699832 | 41.80040164 | 53.64812369 | 0.16100325   | 0.28295099  | 0.2114285 |
| <b>B7LH73</b> | TY-2482_chromosome | + | 2542292 | 2543443 | 100.7989604 | 113.0301759 | 112.9726996 | 110.5394663 | 84.51910678 | 109.0444241 | 0.086604121  | 0.197707482 | 0.1460617 |
| <b>B7LH74</b> | TY-2482_chromosome | + | 2543796 | 2544947 | 49.01384675 | 21.4801473  | 41.73046265 | 48.12081081 | 39.06247629 | 44.72673957 | -0.090124615 | 0.333973436 | 0.2508539 |
| <b>B7LH72</b> | TY-2482_chromosome | + | 2544963 | 2545820 | 27.71343103 | 23.99319236 | 27.08492538 | 33.55029354 | 19.10172748 | 18.77094676 | 0.094996558  | 0.154419411 | 0.1129125 |
| <b>B7LH78</b> | TY-2482_chromosome | + | 2549245 | 2549826 | 39.69819361 | 46.92610096 | 28.54130915 | 25.17090224 | 31.1236437  | 8.668394823 | 0.632623282  | 1.80641344  | 1.5030937 |
| <b>B7LH82</b> | TY-2482_chromosome | + | 2550634 | 2553147 | 114.9590712 | 138.2335732 | 130.0941506 | 118.4155089 | 103.7066527 | 104.0624385 | 0.18035038   | 0.582402455 | 0.4522304 |
| <b>B7LH80</b> | TY-2482_chromosome | + | 2553161 | 2554249 | 137.5745732 | 158.0965778 | 120.4636853 | 139.234133  | 134.6664682 | 138.1522378 | -0.054502411 | 0.006296703 | 0.0038156 |
| <b>B7LH84</b> | TY-2482_chromosome | - | 2554298 | 2555155 | 344.9631921 | 304.3628517 | 284.2919569 | 485.2758976 | 496.8946118 | 481.5760499 | -0.647138361 | 2.805591628 | 2.3883205 |
| <b>B7LH85</b> | TY-2482_chromosome | + | 2555219 | 2557252 | 1202.707313 | 967.659674  | 1131.033845 | 1611.546182 | 1266.618837 | 2006.997711 | -0.477747471 | 1.971874706 | 1.6465805 |
| <b>B7LH86</b> | TY-2482_chromosome | + | 2557213 | 2557605 | 287.2184137 | 268.4520552 | 277.9297731 | 284.339186  | 242.8722031 | 324.6031017 | 0.002635315  | 0.050058898 | 0.0350534 |
| <b>B7LH87</b> | TY-2482_chromosome | + | 2557628 | 2558215 | 590.0925407 | 534.186647  | 590.315328  | 1046.813663 | 1104.844355 | 965.8766953 | -0.844375084 | 4.972235802 | 4.3515103 |
| <b>B7LH83</b> | TY-2482_chromosome | + | 2558228 | 2558800 | 561.64321   | 536.2781968 | 557.900629  | 1099.327783 | 1058.353148 | 1143.189261 | -0.976847146 | 6.601715174 | 5.868712  |
| <b>B7LH89</b> | TY-2482_chromosome | - | 2558920 | 2559957 | 394.8499368 | 399.1685926 | 384.1671623 | 147.8101469 | 123.6636522 | 160.248128  | 1.450278934  | 11.65213436 | 10.644337 |
| <b>D3GXP1</b> | TY-2482_chromosome | - | 2560033 | 2560710 | 181.4735088 | 223.1351826 | 211.9999008 | 108.8564235 | 101.8434972 | 133.8133244 | 0.837951245  | 4.252015057 | 3.6937288 |
| <b>B7LH91</b> | TY-2482_chromosome | + | 2560793 | 2561308 | 126.9114857 | 163.1488218 | 136.5470746 | 209.391561  | 238.5060512 | 197.5736838 | -0.667076316 | 2.500234973 | 2.1158311 |
| <b>B7LH88</b> | TY-2482_chromosome | - | 2561294 | 2561734 | 225.0936826 | 236.3844601 | 209.7585798 | 182.2847975 | 182.5852276 | 142.3709442 | 0.424120569  | 1.751015366 | 1.4571577 |
| <b>B7LH93</b> | TY-2482_chromosome | + | 2561785 | 2562084 | 738.6836712 | 813.8366428 | 843.9180503 | 245.2883206 | 197.4063086 | 210.6092976 | 1.84489225   | 18.1655455  | 16.927804 |
| <b>B7LH94</b> | TY-2482_chromosome | - | 2562077 | 2562577 | 3924.497661 | 4165.322135 | 4495.725116 | 1459.586273 | 1138.372551 | 1302.480473 | 1.677013047  | 5.492238586 | 4.833327  |
| <b>B7LH95</b> | TY-2482_chromosome | - | 2562574 | 2563095 | 5129.286301 | 5340.01922  | 5816.194333 | 1795.618002 | 1581.606257 | 1739.215179 | 1.676132214  | 5.182159017 | 4.5460658 |
| <b>B7LH96</b> | TY-2482_chromosome | + | 2563304 | 2564296 | 793.3323131 | 811.8632732 | 895.4685674 | 46.47355255 | 31.76625172 | 33.11948855 | 4.452392329  | 68.20574423 | 65.977762 |
| <b>D3GXP8</b> | TY-2482_chromosome | + | 2564290 | 2565183 | 493.6731204 | 428.7852529 | 478.7112952 | 47.36099532 | 36.28619581 | 52.33897238 | 3.410581596  | 46.66186628 | 44.847619 |
| <b>B7LH98</b> | TY-2482_chromosome | + | 2565392 | 2566396 | 528.2102933 | 418.8649031 | 468.0526277 | 672.8483646 | 708.889251  | 842.958932  | -0.570858511 | 2.72530695  | 2.3187734 |
| <b>B7LH97</b> | TY-2482_chromosome | - | 2566520 | 2567761 | 394.3431703 | 620.6853234 | 341.8865472 | 325.6426455 | 323.0380847 | 351.1539087 | 0.126047331  | 0.162420267 | 0.1191298 |
| <b>B7LHA0</b> | TY-2482_chromosome | - | 2567918 | 2569804 | 9060.008572 | 8604.266924 | 10010.04802 | 32224.29074 | 26733.55732 | 34666.16659 | -1.713470237 | 4.479548635 | 3.9008295 |
| <b>B7LHA1</b> | TY-2482_chromosome | - | 2569987 | 2570868 | 12944.3201  | 13128.88418 | 12817.73789 | 15712.17574 | 15432.64305 | 15374.32492 | -0.268297641 | 0.285106063 | 0.2130223 |
| <b>B7LH99</b> | TY-2482_chromosome | - | 2570980 | 2573112 | 24594.12    | 24414.04385 | 26095.22092 | 35314.93258 | 26576.07642 | 37849.87536 | -0.386773356 | 0.486765148 | 0.3734684 |
| <b>sraG</b>   | TY-2482_chromosome | + | 2573169 | 2573342 | 990.2303959 | 907.3060002 | 926.8957405 | 765.6463201 | 905.6164262 | 679.2338364 | 0.264010355  | 0.757238049 | 0.5996361 |
| <b>B7LGI7</b> | TY-2482_chromosome | - | 2573362 | 2573628 | 16363.44986 | 15929.29281 | 16646.53399 | 7017.129449 | 11641.62182 | 8109.723094 | 0.907611487  | 1.474968179 | 1.2135626 |
| <b>B7LHN1</b> | TY-2482_chromosome | - | 2573780 | 2574721 | 4458.503197 | 4621.239929 | 4881.894274 | 5396.764454 | 3763.81937  | 4846.64643  | -0.02036601  | 0.004292316 | 0.0021938 |
| <b>D3GXQ8</b> | TY-2482_chromosome | - | 2574724 | 2575149 | 2095.300205 | 2169.289826 | 2400.826002 | 2815.913643 | 1906.400614 | 2422.026752 | -0.114002539 | 0.111410266 | 0.0815762 |
| <b>B7LHN3</b> | TY-2482_chromosome | - | 2575289 | 2577958 | 24671.05181 | 26749.72734 | 27452.00898 | 46043.45193 | 29487.28305 | 45431.79721 | -0.628174288 | 0.832852294 | 0.662734  |
| <b>B7LHN0</b> | TY-2482_chromosome | - | 2577986 | 2579470 | 9092.094311 | 9703.046289 | 9938.599312 | 21042.42301 | 14621.61351 | 21792.79804 | -1.000193677 | 1.821029711 | 1.5156003 |
| <b>E6WIP2</b> | TY-2482_chromosome | - | 2579501 | 2580076 | 1964.571872 | 1983.25394  | 1892.78367  | 3472.132832 | 3171.467572 | 3594.138937 | -0.815234983 | 1.661830233 | 1.3779653 |
| <b>metV</b>   | TY-2482_chromosome | - | 2580157 | 2580233 | 1047.113898 | 848.3378968 | 353.1730884 | 65.29319761 | 216.3676815 | 56.32402841 | 2.636983333  | 11.21388718 | 10.228484 |
| <b>B7LHN6</b> | TY-2482_chromosome | + | 2580581 | 2581921 | 631.0793747 | 674.5817999 | 657.5803632 | 919.4478039 | 865.4212086 | 918.2738252 | -0.474806236 | 1.80531801  | 1.5021895 |
| <b>B7LHN7</b> | TY-2482_chromosome | - | 2581935 | 2583557 | 98.73442529 | 107.1104719 | 85.51501804 | 58.33324096 | 73.84516145 | 49.08779235 | 0.615542744  | 2.588341497 | 2.1959328 |
| <b>leuU</b>   | TY-2482_chromosome | - | 2584014 | 2584100 | 580.7394602 | 516.9774388 | 356.4390821 | 325.4638558 | 461.620421  | 280.7840682 | 0.381678297  | 1.201583092 | 0.9752067 |
| <b>B7LHN4</b> | TY-2482_chromosome | - | 2584118 | 2584447 | 3612.047207 | 3552.368575 | 3641.199115 | 3048.533848 | 5666.356174 | 2930.541486 | -0.097939222 | 0.108973769 | 0.0798776 |
| <b>B7LHN9</b> | TY-2482_chromosome | - | 2584678 | 2586012 | 2788.067276 | 2399.333614 | 2662.089608 | 4566.298851 | 3672.834984 | 4963.482879 | -0.702558292 | 1.39784858  | 1.1469125 |
| <b>B7LHN8</b> | TY-2482_chromosome | - | 2586008 | 2586853 | 711.1902052 | 688.2062154 | 717.6959395 | 957.3407299 | 879.0080688 | 1177.023405 | -0.464219592 | 2.009196357 | 1.679452  |
| <b>B7LHP1</b> | TY-2482_chromosome | - | 2586946 | 2588877 | 13476.10085 | 12544.9254  | 13270.07129 | 27687.62095 | 24871.64353 | 28089.59428 | -1.017651725 | 1.919499936 | 1.6011929 |
| <b>B7LHP2</b> | TY-2482_chromosome | - | 2588980 | 2589606 | 2789.290714 | 2967.45241  | 3133.617425 | 3896.335668 | 4128.946474 | 3623.411108 | -0.396121625 | 0.556537666 | 0.4305827 |
| <b>A1AG83</b> | TY-2482_chromosome | - | 2589665 | 2589964 | 1880.174744 | 1754.430406 | 1694.66004  | 1402.162725 | 2421.041219 | 1441.096302 | 0.029775986  | 0.027257457 | 0.0182471 |
| <b>B7LHP0</b> | TY-2482_chromosome | - | 2590184 | 2590657 | 578.0095726 | 592.548379  | 604.1483331 | 1677.370312 | 1711.848141 | 1446.162412 | -1.466882321 | 11.2182979  | 10.231973 |
| <b>B7LHP4</b> | TY-2482_chromosome | + | 2590905 | 2592335 | 414.8587558 | 480.9550653 | 460.2097171 | 638.2758311 | 622.4404856 | 676.1246516 | -0.530832788 | 1.943197654 | 1.6221328 |



|        |                    |   |         |         |              |             |             |             |             |             |              |             |           |
|--------|--------------------|---|---------|---------|--------------|-------------|-------------|-------------|-------------|-------------|--------------|-------------|-----------|
| B7LHP6 | TY-2482_chromosome | - | 2592381 | 2593550 | 1313.696611  | 1542.434295 | 1573.506741 | 2394.867096 | 2147.593663 | 3118.722549 | -0.76027256  | 2.417707382 | 2.044144  |
| B7LHP7 | TY-2482_chromosome | - | 2593569 | 2594531 | 657.2708676  | 697.7437413 | 672.7381046 | 835.7448038 | 959.2285043 | 936.6660935 | -0.424804961 | 1.607975902 | 1.3320866 |
| B7LHP5 | TY-2482_chromosome | - | 2594661 | 2594915 | 7869.497427  | 7648.055243 | 7992.173561 | 10470.51317 | 14246.12189 | 10183.22088 | -0.558224296 | 0.82627948  | 0.6574542 |
| D3GXS5 | TY-2482_chromosome | + | 2594885 | 2595451 | 10821.16527  | 10859.98947 | 11436.00686 | 11981.40111 | 17979.10939 | 14077.32969 | -0.461447103 | 0.625464445 | 0.4879105 |
| B7LHQ0 | TY-2482_chromosome | + | 2595506 | 2596474 | 2147.303249  | 1773.245224 | 1804.233952 | 1309.00266  | 1282.411861 | 1152.570117 | 0.724973409  | 3.145919208 | 2.6868768 |
| B7LHQ1 | TY-2482_chromosome | + | 2596705 | 2596980 | 82.85318215  | 108.5122652 | 79.58752591 | 112.8032106 | 119.2135818 | 123.5909296 | -0.467631943 | 1.278976976 | 1.0427133 |
| B7LHP8 | TY-2482_chromosome | - | 2597034 | 2598290 | 1702.921065  | 1487.470005 | 1667.812375 | 3791.898726 | 3415.337967 | 4196.547496 | -1.179323502 | 3.24277287  | 2.7748782 |
| A7ZS88 | TY-2482_chromosome | + | 2598411 | 2598749 | 396.4945119  | 331.1297189 | 377.0302341 | 544.4184176 | 566.0809509 | 510.6306665 | -0.519629549 | 2.215727056 | 1.8645188 |
| B7LHQ2 | TY-2482_chromosome | - | 2598762 | 2599052 | 782.9876588  | 709.5965683 | 832.0830228 | 1035.500329 | 1141.239444 | 1070.965922 | -0.435674027 | 1.91205908  | 1.5953335 |
| B7LHQ5 | TY-2482_chromosome | - | 2599055 | 2599687 | 1583.181633  | 1481.926109 | 1624.264522 | 2542.820328 | 2475.313783 | 2593.042651 | -0.671238089 | 2.089448331 | 1.7504567 |
| B7LHQ6 | TY-2482_chromosome | - | 2599709 | 2600257 | 707.5973318  | 629.2151795 | 637.6678924 | 1020.380379 | 1126.675599 | 1070.941241 | -0.680260517 | 3.650801545 | 3.1400586 |
| B7LHQ4 | TY-2482_chromosome | - | 2600265 | 2601044 | 710.5361494  | 654.8079167 | 662.7901726 | 738.540205  | 858.2198719 | 826.1702556 | -0.226336958 | 0.704088474 | 0.5528807 |
| B7LHQ8 | TY-2482_chromosome | - | 2601055 | 2601861 | 919.8447826  | 871.3211864 | 937.5947151 | 1061.275387 | 1066.586047 | 1018.390524 | -0.191772509 | 0.546241706 | 0.4214298 |
| B7LHQ7 | TY-2482_chromosome | + | 2602071 | 2603045 | 917.5854898  | 980.5324411 | 845.5163022 | 302.2815221 | 388.6473084 | 386.6131234 | 1.350870862  | 9.858229557 | 8.9336838 |
| B7LHR0 | TY-2482_chromosome | + | 2603062 | 2604045 | 1571.086425  | 1699.749511 | 1676.357017 | 740.5292388 | 716.1206224 | 955.9539395 | 1.066009215  | 6.120586524 | 5.4213647 |
| B7LHR1 | TY-2482_chromosome | + | 2604069 | 2604632 | 861.4204215  | 891.3437658 | 917.1273689 | 732.8623761 | 612.3316155 | 865.218725  | 0.300248877  | 0.760426    | 0.6022766 |
| B7LHR2 | TY-2482_chromosome | + | 2604632 | 2605204 | 887.6054621  | 970.3524252 | 879.9619119 | 1156.42843  | 1053.755934 | 1303.488329 | -0.370861149 | 1.106114397 | 0.8939268 |
| B7LHR3 | TY-2482_chromosome | + | 2605176 | 2605730 | 1229.4303    | 1182.914652 | 1268.381945 | 1840.027022 | 1609.758756 | 2243.952888 | -0.579695724 | 2.602870977 | 2.2083456 |
| B7LHR4 | TY-2482_chromosome | + | 2605740 | 2606462 | 1456.166741  | 1316.857069 | 1324.31374  | 1844.394487 | 1856.418312 | 2513.563382 | -0.536941492 | 2.347585291 | 1.98116   |
| B7LHR5 | TY-2482_chromosome | + | 2606513 | 2607943 | 4418.247749  | 4335.264002 | 4286.175282 | 5706.16957  | 5586.759179 | 6372.635605 | -0.420462454 | 0.619731438 | 0.483742  |
| B7LHR6 | TY-2482_chromosome | + | 2607969 | 2608253 | 1481.449988  | 1414.846779 | 1543.066486 | 2447.044977 | 2283.287271 | 2343.153553 | -0.658103015 | 2.021866144 | 1.6904777 |
| B7LHR7 | TY-2482_chromosome | + | 2608374 | 2608862 | 1350.591588  | 1273.262545 | 1398.475596 | 2208.708812 | 1868.246739 | 2196.963967 | -0.619829989 | 2.763371759 | 2.3505247 |
| B7LHQ9 | TY-2482_chromosome | + | 2608911 | 2609762 | 1169.738022  | 1074.558395 | 1055.56963  | 2142.314958 | 1824.555271 | 2244.232603 | -0.900053979 | 5.105715865 | 4.4753479 |
| B7LHR9 | TY-2482_chromosome | + | 2609762 | 2610031 | 188.5142571  | 214.2408559 | 144.0229883 | 201.389885  | 219.3233044 | 230.1023585 | -0.319661333 | 0.64241082  | 0.5020075 |
| B7LHS0 | TY-2482_chromosome | + | 2610247 | 2610876 | 2421.565085  | 2228.815709 | 2347.785519 | 3922.156524 | 5718.039786 | 4212.862266 | -0.95138332  | 2.127894886 | 1.7843097 |
| B7LHS1 | TY-2482_chromosome | - | 2610879 | 2611604 | 933.2602462  | 975.8914865 | 919.6075015 | 1086.715447 | 1314.22817  | 1018.595659 | -0.29716104  | 0.737718258 | 0.5820271 |
| B7LHR8 | TY-2482_chromosome | + | 2611604 | 2612254 | 1128.328693  | 1172.50635  | 1318.075548 | 911.0311443 | 837.2206846 | 827.6452765 | 0.493332279  | 1.79121101  | 1.4896097 |
| ryhA   | TY-2482_chromosome | + | 2612372 | 2612479 | 202.964987   | 247.9182189 | 323.5584356 | 136.9780629 | 106.3969838 | 113.2835531 | 1.121392721  | 6.273889156 | 5.5644212 |
| B7LHS3 | TY-2482_chromosome | - | 2612487 | 2614820 | 3300.884914  | 3405.282918 | 3453.058289 | 2355.924624 | 1880.061023 | 2236.471015 | 0.638334732  | 1.175549123 | 0.9552202 |
| B7LHS4 | TY-2482_chromosome | - | 2614919 | 2615845 | 184.5874422  | 188.5731512 | 211.4814142 | 32.99593696 | 28.17175051 | 29.0327695  | 2.694126966  | 32.84109165 | 31.28555  |
| D7Z4E7 | TY-2482_chromosome | - | 2616240 | 2616473 | 79.03930546  | 103.9340203 | 87.05798569 | 51.40691681 | 75.64603798 | 64.46666417 | 0.464261957  | 1.500159025 | 1.2356152 |
| B7LHS5 | TY-2482_chromosome | + | 2616427 | 2620977 | 1511.230798  | 1689.181634 | 1626.162235 | 2205.987197 | 1628.803885 | 2624.059312 | -0.413226463 | 0.937542191 | 0.7502213 |
| B7LHS6 | TY-2482_chromosome | + | 2620993 | 2622408 | 799.3754209  | 814.1180295 | 833.9131359 | 971.4934581 | 743.3724101 | 995.666621  | -0.143591684 | 0.341135967 | 0.2568627 |
| C5W9G1 | TY-2482_chromosome | + | 2622595 | 2623071 | 42.52317216  | 54.75503145 | 39.32273956 | 39.73580152 | 26.2720376  | 35.46576263 | 0.322045016  | 0.895436798 | 0.7155225 |
| B7LHS7 | TY-2482_chromosome | + | 2623055 | 2623393 | 227.2107348  | 220.1131694 | 272.3676051 | 40.66256839 | 62.17812528 | 19.31232906 | 2.535388187  | 20.15170784 | 20.684742 |
| B7LHS9 | TY-2482_chromosome | - | 2623475 | 2623936 | 157.7873512  | 157.2193488 | 155.1001577 | 99.83732563 | 87.28465737 | 107.6803002 | 0.68081999   | 3.229957265 | 2.7642927 |
| B7LHT0 | TY-2482_chromosome | - | 2623936 | 2624808 | 222.1802799  | 213.8538113 | 201.8657965 | 202.3362955 | 177.3857741 | 207.738684  | 0.115235677  | 0.251959614 | 0.1875587 |
| B7LHT1 | TY-2482_chromosome | - | 2624808 | 2625494 | 146.0121691  | 98.27477743 | 149.534131  | 181.5378154 | 150.0942332 | 157.9807058 | -0.23081908  | 0.823028742 | 0.6547645 |
| B7LHS8 | TY-2482_chromosome | - | 2625545 | 2627032 | 227.3268381  | 231.6896243 | 221.7491839 | 192.2608667 | 165.6381311 | 126.8381902 | 0.418491977  | 1.666089003 | 1.3813084 |
| B7LHT3 | TY-2482_chromosome | - | 2627144 | 2628034 | 584.6809629  | 577.9245957 | 684.3017233 | 471.7212954 | 399.4385559 | 444.6679985 | 0.511483985  | 1.81502341  | 1.5099783 |
| B7LHT2 | TY-2482_chromosome | - | 2628159 | 2628947 | 1067.9226234 | 1030.748715 | 1061.651809 | 510.6683315 | 534.1626179 | 624.6095121 | 0.96264695   | 5.584180626 | 4.9222214 |
| B7LHT5 | TY-2482_chromosome | + | 2629375 | 2630739 | 145.1481205  | 153.4433562 | 119.7762658 | 99.12477847 | 104.6828644 | 94.86038023 | 0.428744866  | 1.734848406 | 1.443045  |
| B7LHT6 | TY-2482_chromosome | - | 2630788 | 2631282 | 2746.877242  | 2568.606281 | 2615.790776 | 3326.220505 | 3274.277307 | 3648.026344 | -0.338525573 | 0.514135897 | 0.3956201 |
| B7LHT4 | TY-2482_chromosome | - | 2631291 | 2631926 | 4305.309063  | 4060.265065 | 4425.638703 | 6324.17975  | 6054.517247 | 6989.657702 | -0.559904025 | 0.955285783 | 0.7654676 |
| Q0TCN7 | TY-2482_chromosome | + | 2631868 | 2632074 | 1627.333443  | 1558.73361  | 1571.964659 | 1694.87573  | 1947.588616 | 1628.954249 | -0.145413394 | 0.330231521 | 0.2483777 |
| B7LHT8 | TY-2482_chromosome | - | 2632324 | 2632713 | 21735.96072  | 21266.0966  | 20972.94338 | 21453.03773 | 24693.3913  | 22747.03311 | -0.09642769  | 0.100180401 | 0.0732921 |
| B7LHT9 | TY-2482_chromosome | - | 2632732 | 2633157 | 23758.04797  | 23672.08539 | 24720.5684  | 20134.92795 | 23055.27478 | 22954.76011 | 0.155986351  | 0.119389276 | 0.0875119 |
| B7LHU0 | TY-2482_chromosome | - | 2633379 | 2634503 | 510.6952791  | 513.01802   | 550.750389  | 853.0364325 | 876.3874328 | 848.6316956 | -0.698682408 | 3.458750812 | 2.9681972 |
| B7LHU1 | TY-2482_chromosome | + | 2634697 | 2635092 | 3084.755052  | 3140.184167 | 3288.711509 | 2188.497225 | 2847.662933 | 2398.479852 | 0.379278056  | 0.498463662 | 0.3833101 |
| B7LHU2 | TY-2482_chromosome | + | 2635249 | 2636613 | 800.7017098  | 957.3058935 | 912.4909977 | 1019.875959 | 901.76801   | 1128.520626 | -0.206395463 | 0.487583435 | 0.3740396 |
| B7LHU3 | TY-2482_chromosome | + | 2636706 | 2637770 | 328.1026606  | 407.8860752 | 342.5054388 | 298.6003883 | 346.7878085 | 311.8856876 | 0.119671936  | 0.384591739 | 0.2919192 |
| B7LHU4 | TY-2482_chromosome | - | 2637839 | 2638774 | 13469.41745  | 11721.25619 | 13289.28638 | 7632.547156 | 7287.676949 | 7179.406254 | 0.828638149  | 1.375744756 | 1.1280188 |
| B7LHT7 | TY-2482_chromosome | + | 2639209 | 2639676 | 437.3388347  | 461.3121745 | 496.6649186 | 598.5495288 | 814.6402803 | 636.9641542 | -0.533915534 | 2.033586325 | 1.7005766 |
| B5YSW4 | TY-2482_chromosome | + | 2639993 | 2640305 | 502.277848   | 609.6704793 | 598.9528749 | 281.9009573 | 484.8984414 | 306.8035399 | 0.744754096  | 3.297776779 | 2.8239733 |
| B7LHU7 | TY-2482_chromosome | - | 2640366 | 2640635 | 83.60785104  | 85.65196117 | 99.95310336 | 48.44013356 | 120.5577947 | 51.942966   | 0.328354222  | 0.501118148 | 0.3852197 |
| B7LHU8 | TY-2482_chromosome | - | 2640730 | 2642694 | 116.5201429  | 140.3022439 | 118.0203985 | 126.6756621 | 138.3724394 | 121.203576  | -0.102377004 | 0.097114705 | 0.0714395 |
| B7LHU9 | TY-2482_chromosome | - | 2642703 | 2643632 | 106.2468419  | 114.6703179 | 87.4207602  | 75.44176201 | 74.59591728 | 81.46864872 | 0.366520896  | 1.289608793 | 1.0517025 |

|        |                    |   |         |         |             |             |              |             |              |             |              |             |           |
|--------|--------------------|---|---------|---------|-------------|-------------|--------------|-------------|--------------|-------------|--------------|-------------|-----------|
| B5YSW8 | TY-2482_chromosome | - | 2643643 | 2643912 | 43.99573928 | 57.32930523 | 41.99219203  | 49.9483456  | 33.60839608  | 28.09331107 | 0.195910614  | 0.653498144 | 0.5112148 |
| B7LHV1 | TY-2482_chromosome | + | 2644026 | 2644952 | 500.0797777 | 571.5353114 | 589.7516873  | 246.2956586 | 216.5093438  | 262.92335   | 1.195253298  | 7.905341671 | 7.0923331 |
| B7LHV2 | TY-2482_chromosome | - | 2645086 | 2646528 | 2452.696174 | 2822.579277 | 2813.36179   | 3120.140447 | 2802.887934  | 3238.902496 | -0.191336105 | 0.212869969 | 0.1576423 |
| B7LHU5 | TY-2482_chromosome | - | 2646687 | 2650484 | 2215.151857 | 2194.399104 | 2020.12285   | 1335.528822 | 1531.655997  | 1469.522869 | 0.569627675  | 2.278283691 | 1.9193161 |
| B7LHV4 | TY-2482_chromosome | - | 2650555 | 2652021 | 1185.161601 | 1305.678161 | 1316.590594  | 1384.213367 | 1526.189416  | 1443.270817 | -0.195052011 | 0.463882282 | 0.354765  |
| B7LHV5 | TY-2482_chromosome | - | 2652014 | 2652604 | 533.099548  | 594.2364986 | 542.6140752  | 504.8157464 | 581.5779404  | 527.6391597 | 0.027009314  | 0.088688834 | 0.0649275 |
| B7LHV6 | TY-2482_chromosome | - | 2652616 | 2653101 | 331.9115758 | 397.5968689 | 322.6072839  | 310.7001033 | 412.2908602  | 445.6301215 | -0.156845273 | 0.318061273 | 0.238842  |
| B7LHV8 | TY-2482_chromosome | - | 2653104 | 2654204 | 827.9959596 | 750.0672958 | 736.6627277  | 1178.870023 | 1430.56768   | 1832.006909 | -0.859496806 | 4.723962837 | 4.1219028 |
| B7LHV9 | TY-2482_chromosome | - | 2654273 | 2655313 | 1492.745306 | 1348.140199 | 1478.976925  | 3132.784101 | 3299.761793  | 4580.291686 | -1.257919723 | 3.709191812 | 3.1919226 |
| D7X6F8 | TY-2482_chromosome | + | 2655282 | 2655470 | 197.9894336 | 233.5082149 | 217.2064834  | 377.161086  | 395.7832812  | 562.3817701 | -1.007908606 | 5.600958929 | 4.938125  |
| B7LHW0 | TY-2482_chromosome | + | 2655421 | 2655606 | 156.1603045 | 184.2467634 | 158.97542823 | 194.4474835 | 258.4829744  | 287.7074419 | -0.554014438 | 2.103564199 | 1.7633246 |
| B7LHW1 | TY-2482_chromosome | - | 2655621 | 2657558 | 747.8541859 | 759.5600962 | 699.6802425  | 765.4371556 | 921.0336985  | 852.5248952 | -0.201294731 | 0.530246313 | 0.4088822 |
| B7LHV3 | TY-2482_chromosome | + | 2657710 | 2658681 | 1042.311297 | 1169.004141 | 1160.099899  | 628.8580528 | 631.5195907  | 765.3468457 | 0.752669105  | 3.776762661 | 3.2522314 |
| D3GXL9 | TY-2482_chromosome | + | 2658867 | 2659254 | 81.68330432 | 61.12334234 | 77.32949397  | 58.22487822 | 61.86024811  | 70.82029954 | 0.300294856  | 0.492932832 | 0.3786468 |
| Q53295 | TY-2482_chromosome | + | 2659501 | 2659686 | 1543.057172 | 1253.087742 | 1303.139528  | 2229.378527 | 2172.220902  | 2713.73604  | -0.732742218 | 2.638088971 | 2.238576  |
| B7LHW3 | TY-2482_chromosome | + | 2659662 | 2660129 | 2949.728911 | 2391.696524 | 2541.779292  | 4951.55808  | 4338.085854  | 6222.307963 | -0.904201422 | 2.052086103 | 1.716817  |
| B7LHW4 | TY-2482_chromosome | + | 2660143 | 2661489 | 8189.81292  | 6888.743603 | 7024.733531  | 12940.05465 | 11456.53412  | 14972.64203 | -0.786171543 | 1.442851948 | 1.1861116 |
| B7LHW5 | TY-2482_chromosome | + | 2661601 | 2661840 | 56.26612105 | 57.94175994 | 38.41663442  | 75.92150498 | 80.04872974  | 95.73636496 | -0.756484165 | 2.629930786 | 2.2313718 |
| B7LHW2 | TY-2482_chromosome | + | 2661833 | 2663281 | 316.4012317 | 311.4896872 | 284.3533546  | 494.3482413 | 464.0395905  | 599.5245224 | -0.756227588 | 3.656701717 | 3.1450324 |
| B7LHW6 | TY-2482_chromosome | + | 2663296 | 2664174 | 717.1723493 | 675.6686469 | 742.1999164  | 1041.383191 | 1016.462292  | 1241.609585 | -0.57535262  | 2.898966427 | 2.4705803 |
| B7LHW7 | TY-2482_chromosome | + | 2664506 | 2665468 | 2606.64624  | 1918.107585 | 1995.623139  | 4111.509308 | 5102.769855  | 4124.675169 | -0.987055909 | 2.313897021 | 1.9524233 |
| B7LHW8 | TY-2482_chromosome | + | 2665497 | 2665790 | 727.31455   | 557.5802659 | 536.411291   | 1276.224645 | 1657.28263   | 1549.719032 | -1.242843727 | 8.697505405 | 7.8354273 |
| B7LHW9 | TY-2482_chromosome | + | 2665879 | 2666760 | 54.8667788  | 37.84120891 | 45.47416619  | 60.86322419 | 77.45837358  | 59.43744161 | -0.453167751 | 1.433877806 | 1.1788526 |
| B7LHX4 | TY-2482_chromosome | + | 2669259 | 2672360 | 219.3958837 | 151.9577254 | 200.8147576  | 156.7204811 | 139.5895837  | 152.0625332 | 0.522018543  | 1.589591292 | 1.3153154 |
| B7LHX7 | TY-2482_chromosome | + | 2673376 | 2674290 | 53.67917067 | 74.63945694 | 50.49310277  | 77.2734199  | 59.08986741  | 58.1361367  | -0.274301646 | 0.236951319 | 0.1755202 |
| B7LHX8 | TY-2482_chromosome | + | 2674361 | 2675539 | 42.26309907 | 69.34117517 | 52.06469042  | 44.20587703 | 38.19107415  | 36.99907838 | 0.320704211  | 1.035220128 | 0.8320886 |
| B7LHX5 | TY-2482_chromosome | + | 2675552 | 2676652 | 28.27366544 | 39.19915791 | 27.48635588  | 43.0163101  | 28.08241139  | 39.37057416 | -0.329846031 | 0.389223787 | 0.2952537 |
| B7LHY0 | TY-2482_chromosome | + | 2676663 | 2677418 | 39.54621388 | 54.00700161 | 33.23949395  | 56.53996793 | 49.07748573  | 57.78722916 | -0.483764042 | 0.88062902  | 0.7030126 |
| Q8CLX4 | TY-2482_chromosome | + | 2677629 | 2678106 | 11195.11322 | 42142.48244 | 525.1876222  | 36097.80832 | 341734.9207  | 14549.76014 | -3.718451978 | 2.59767782  | 2.2045639 |
| rrfV   | TY-2482_chromosome | - | 2677650 | 2677769 | 7568.117801 | 27805.67178 | 315.9039086  | 20696.92739 | 198856.8303  | 8395.313355 | -3.520686326 | 2.334901665 | 1.9709032 |
| thrV   | TY-2482_chromosome | - | 2677807 | 2677882 | 40.79979368 | 329.4895002 | 10.260228    | 629.4302731 | 1758.865663  | 589.1099194 | -3.920819531 | 5.056093424 | 4.4289635 |
| rrfC   | TY-2482_chromosome | - | 2677895 | 2678014 | 3597.783224 | 14127.5786  | 166.6867984  | 15253.33614 | 142606.5383  | 5927.218754 | -4.064663493 | 3.04588037  | 2.6011137 |
| rrfE   | TY-2482_chromosome | - | 2678108 | 2681011 | 579282.199  | 5969947.426 | 1623912.548  | 1370125.629 | 1154855.021  | 6022881.317 | -0.453216752 | 0.035362172 | 0.0240837 |
| C1HUN0 | TY-2482_chromosome | + | 2678333 | 2678689 | 74969.52177 | 764818.2484 | 206916.4755  | 48041.78107 | 30642.7816   | 338161.1304 | 1.027301543  | 1.168692287 | 0.9497834 |
| C1HUN1 | TY-2482_chromosome | + | 2678693 | 2679145 | 101024.2229 | 1134807.387 | 280499.5623  | 81622.8154  | 48292.31944  | 557039.9751 | 0.797580411  | 0.7935621   | 0.733621  |
| C1HUN3 | TY-2482_chromosome | + | 2679222 | 2679425 | 47654.68722 | 599604.3979 | 149693.8507  | 121867.134  | 1011770.6441 | 599245.739  | -0.463232135 | 0.024160159 | 0.0161895 |
| Q1R3T8 | TY-2482_chromosome | + | 2680483 | 2680785 | 91833.31532 | 759694.3215 | 246570.3793  | 308443.0769 | 258144.8314  | 1237450.922 | -1.036531025 | 0.591741853 | 0.4598972 |
| gltV   | TY-2482_chromosome | - | 2681205 | 2681280 | 1663.6051   | 1633.396818 | 890.3069164  | 302.125645  | 1262.327822  | 183.0672703 | 1.145230418  | 2.622276563 | 2.2241173 |
| rrsD   | TY-2482_chromosome | - | 2681366 | 2682907 | 865398.0894 | 3841816.489 | 1869718.658  | 203393.2007 | 240744.7424  | 764829.9727 | 2.307411636  | 4.450766179 | 3.673541  |
| Q57H85 | TY-2482_chromosome | - | 2681469 | 2681786 | 212280.4223 | 948480.5008 | 431403.4979  | 14208.59886 | 17912.16168  | 87617.56464 | 3.658258576  | 7.57133169  | 6.783559  |
| E9WNY3 | TY-2482_chromosome | + | 2682761 | 2682994 | 125613.3644 | 573698.8838 | 245012.4994  | 42009.50646 | 65670.11596  | 121307.1724 | 1.799960321  | 3.68972158  | 3.1740152 |
| C6UV66 | TY-2482_chromosome | + | 2683088 | 2683930 | 2619.853458 | 2628.77448  | 1978.846828  | 1471.311858 | 2057.791447  | 1553.990274 | 0.466165849  | 1.183868191 | 0.9613879 |
| B7LHY2 | TY-2482_chromosome | - | 2683912 | 2684165 | 518.7342836 | 665.4706785 | 579.6203448  | 654.4355527 | 773.5848458  | 756.3995721 | -0.341806254 | 0.887377254 | 0.7089247 |
| B7LHX9 | TY-2482_chromosome | - | 2684166 | 2684981 | 732.4186316 | 1089.918111 | 971.9681768  | 1354.460001 | 1337.671993  | 1904.349659 | -0.730602815 | 2.87689378  | 2.4502902 |
| B7LHY4 | TY-2482_chromosome | - | 2684989 | 2685558 | 718.3843717 | 872.5171018 | 878.2827318  | 709.5331627 | 625.0293625  | 1098.872878 | 0.076046243  | 0.03370146  | 0.022929  |
| B7LHY5 | TY-2482_chromosome | - | 2685566 | 2686105 | 1497.74381  | 1648.373657 | 1699.571183  | 1150.437662 | 1168.479522  | 1275.994702 | 0.442753866  | 1.458131594 | 1.1982866 |
| B7LHY6 | TY-2482_chromosome | - | 2686137 | 2686607 | 3848.208778 | 4224.164884 | 4326.630362  | 2675.932593 | 3360.951208  | 2563.128891 | 5.118924821  | 0.834429362 | 0.6634934 |
| B7LHY7 | TY-2482_chromosome | - | 2686582 | 2687703 | 1942.872327 | 2029.214001 | 1836.59517   | 978.0824845 | 1427.155403  | 1015.971414 | 0.749139571  | 3.466746804 | 2.9756039 |
| B7LHY3 | TY-2482_chromosome | + | 2687833 | 2688339 | 2713.940872 | 2563.503098 | 2667.341524  | 3694.138093 | 3626.555182  | 3458.87983  | -0.436649743 | 0.665633282 | 0.5209682 |
| B7LHY8 | TY-2482_chromosome | + | 2688357 | 2689301 | 3237.437914 | 3127.251816 | 3072.636186  | 6341.416101 | 5523.928576  | 6543.710107 | -0.959749027 | 2.018369123 | 1.6874031 |
| B7LHZ0 | TY-2482_chromosome | + | 2689350 | 2690636 | 1373.044231 | 1324.382501 | 1360.071641  | 4202.480516 | 3282.406777  | 4635.838876 | -1.555538316 | 4.87196305  | 4.2579404 |
| B7LHY9 | TY-2482_chromosome | + | 2690661 | 2692034 | 1016.298243 | 999.7299837 | 1024.026555  | 2285.906099 | 2184.960598  | 2696.677199 | -1.204312547 | 8.590025069 | 7.7323317 |
| B7LHZ2 | TY-2482_chromosome | + | 2692167 | 2692574 | 1434.225187 | 1570.832604 | 1526.46612   | 904.1754325 | 1856.906581  | 967.5797204 | 0.282557554  | 0.596007237 | 0.4633885 |
| B7LHZ3 | TY-2482_chromosome | - | 2692577 | 2692792 | 183.3382856 | 175.0504268 | 156.877934   | 201.3479262 | 300.5585     | 158.5726794 | -0.396366946 | 0.904861691 | 0.7226373 |
| B7LHZ4 | TY-2482_chromosome | - | 2692851 | 2693273 | 171.8527206 | 190.3085429 | 189.5460523  | 346.4675603 | 303.9484465  | 262.1851537 | -0.780864466 | 3.401991485 | 2.9184475 |
| B7LHZ1 | TY-2482_chromosome | - | 2693287 | 2693652 | 194.9733107 | 245.6430451 | 207.8482945  | 333.7842245 | 333.1209512  | 270.0720162 | -0.621257804 | 2.00145045  | 1.673127  |
| B7LHZ6 | TY-2482_chromosome | - | 2693762 | 2694142 | 30493.35781 | 25182.43191 | 26772.41886  | 29145.75928 | 24782.46468  | 25733.53747 | 0.060596056  | 0.043639196 | 0.0300105 |

|        |                    |   |         |         |              |             |             |             |             |             |              |             |           |
|--------|--------------------|---|---------|---------|--------------|-------------|-------------|-------------|-------------|-------------|--------------|-------------|-----------|
| B7LHZ7 | TY-2482_chromosome | - | 2694186 | 2695172 | 113836.1346  | 101385.0903 | 110206.4225 | 119511.2528 | 94390.44249 | 110462.9355 | 0.017482613  | 0.003823584 | 0.0018207 |
| B7LHZ8 | TY-2482_chromosome | - | 2695201 | 2695818 | 65347.65636  | 62871.05486 | 66604.54099 | 86931.18185 | 64143.0331  | 78472.43407 | -0.241980475 | 0.236560201 | 0.1752743 |
| B7LHZ9 | TY-2482_chromosome | - | 2695855 | 2696241 | 39788.00683  | 38145.91232 | 41206.66216 | 50722.5174  | 38702.54706 | 47915.90498 | -0.19830573  | 0.203531597 | 0.1503523 |
| B7LHZ5 | TY-2482_chromosome | - | 2696261 | 2696614 | 41950.71159  | 42483.13252 | 43835.02007 | 51639.98004 | 40577.27517 | 46931.922   | -0.131437144 | 0.107858823 | 0.0793477 |
| B7LI01 | TY-2482_chromosome | - | 2696912 | 2698240 | 128112.2303  | 127717.047  | 135665.1497 | 15659.78663 | 116313.5588 | 134087.5828 | -0.115675668 | 0.076696626 | 0.0557404 |
| B7LI02 | TY-2482_chromosome | - | 2698251 | 2698682 | 65722.26612  | 64555.71171 | 70896.16276 | 85834.72455 | 55154.41575 | 69548.71418 | -0.0865325   | 0.056154574 | 0.0397678 |
| A8AQJ7 | TY-2482_chromosome | + | 2698839 | 2699387 | 63717.33605  | 62263.14555 | 66710.21756 | 91035.95729 | 57357.63463 | 76956.84878 | -0.244348226 | 0.221422587 | 0.1638111 |
| Q1R625 | TY-2482_chromosome | + | 2699441 | 2700061 | 68198.35283  | 66863.71513 | 74481.26563 | 81112.65213 | 53948.58504 | 75522.68451 | -0.001096486 | 0.00578795  | 0.0034025 |
| B7L4J6 | TY-2482_chromosome | - | 2700725 | 2701027 | 38355.86221  | 37491.59974 | 40752.45345 | 48229.63735 | 33841.92054 | 46610.7024  | -0.133524868 | 0.132917717 | 0.0972348 |
| B7L4J7 | TY-2482_chromosome | - | 2701045 | 2701581 | 67600.13549  | 65493.21263 | 69522.79036 | 89702.52476 | 65639.14588 | 84222.90516 | -0.24094993  | 0.24197508  | 0.1796661 |
| Q1R618 | TY-2482_chromosome | + | 2701792 | 2702343 | 63383.0505   | 61642.44608 | 66789.46374 | 79569.211   | 62308.39336 | 72758.74275 | -0.161324085 | 0.15320549  | 0.1121172 |
| B7L4K0 | TY-2482_chromosome | - | 2702460 | 2702711 | 32708.99095  | 32079.39937 | 31945.40794 | 22564.21484 | 17509.30123 | 18814.74787 | 0.684821463  | 1.074678086 | 0.8677323 |
| B7L4K2 | TY-2482_chromosome | - | 2702905 | 2703312 | 58196.83003  | 55092.2486  | 59455.53865 | 42584.59623 | 27056.54814 | 38643.38428 | 0.672365226  | 0.933649525 | 0.7472065 |
| B7L4K3 | TY-2482_chromosome | - | 2703328 | 2704026 | 81783.66969  | 78212.63495 | 82872.72223 | 67505.40229 | 42147.92844 | 60531.27841 | 0.504722416  | 0.627915372 | 0.4897366 |
| A8AQL1 | TY-2482_chromosome | + | 2704026 | 2704430 | 45198.5642   | 44497.87105 | 49278.1123  | 46406.07915 | 28874.81967 | 42863.82631 | 0.236458562  | 0.234163389 | 0.1737286 |
| A7MPI1 | TY-2482_chromosome | + | 2704539 | 2705576 | 88992.69307  | 94699.89466 | 99041.9559  | 89505.65125 | 56137.23428 | 83987.28991 | 0.285642606  | 0.310478403 | 0.2327105 |
| B7L4K8 | TY-2482_chromosome | - | 2705827 | 2706429 | 46967.10244  | 51881.8286  | 52803.70854 | 65659.35039 | 39561.54441 | 60120.73928 | -0.153612489 | 0.112012515 | 0.0820132 |
| Q1R603 | TY-2482_chromosome | + | 2706359 | 2707057 | 53916.75505  | 59835.98454 | 61642.96243 | 76509.10115 | 48268.93901 | 68711.77624 | -0.171297583 | 0.129473782 | 0.0944102 |
| B7L4L0 | TY-2482_chromosome | - | 2707105 | 2707413 | 24619.36822  | 27468.56766 | 30002.65493 | 35355.86391 | 24636.74873 | 33742.69267 | -0.197576322 | 0.188757127 | 0.1392193 |
| B7L4L2 | TY-2482_chromosome | + | 2707792 | 2708256 | 245.5610067  | 221.324975  | 180.4390551 | 311.0222117 | 434.3044868 | 272.8527843 | -0.689239784 | 2.492178765 | 2.1090651 |
| B7L4L3 | TY-2482_chromosome | - | 2708259 | 2708732 | 1146.494991  | 1097.538787 | 1075.412348 | 1327.607994 | 1962.345151 | 1086.069837 | -0.417868669 | 1.094367921 | 0.8840376 |
| B7L4L4 | TY-2482_chromosome | - | 2708808 | 2708999 | 115.8535798  | 135.0086425 | 106.0021478 | 30.43942775 | 29.1563126  | 20.14198555 | 2.047038836  | 18.37300998 | 17.130305 |
| C6UVB2 | TY-2482_chromosome | - | 2709185 | 2710366 | 121561.2399  | 113764.2185 | 123087.6476 | 136277.4186 | 102353.3541 | 136034.3514 | -0.04516776  | 0.054568178 | 0.0385627 |
| B7L4L1 | TY-2482_chromosome | - | 2710440 | 2712551 | 15642.179613 | 153142.9926 | 162635.7249 | 154974.4866 | 110334.4894 | 150348.2525 | 0.188877837  | 0.173260264 | 0.1279677 |
| C4ZUJ6 | TY-2482_chromosome | - | 2712582 | 2713118 | 33217.42433  | 33259.44338 | 36235.81647 | 35062.16942 | 26599.75618 | 35101.69919 | 0.099679553  | 0.077257256 | 0.0559019 |
| A7MKJ1 | TY-2482_chromosome | + | 2713131 | 2713589 | 30305.34521  | 31435.24954 | 31713.08646 | 29236.2924  | 24526.71096 | 28460.61576 | 0.175772982  | 0.18391875  | 0.1358715 |
| B7L4L8 | TY-2482_chromosome | - | 2713718 | 2714002 | 290.886242   | 303.5377105 | 279.8020991 | 382.7037045 | 381.2651611 | 443.1164997 | -0.462478758 | 1.683563146 | 1.3967613 |
| B7L4L9 | TY-2482_chromosome | - | 2714013 | 2714369 | 337.2600012  | 317.6655792 | 353.3416526 | 381.2568301 | 430.4626825 | 453.710521  | -0.273361506 | 0.379739499 | 0.771494  |
| B7L4M1 | TY-2482_chromosome | - | 2714372 | 2714755 | 479.1981182  | 557.9655155 | 508.3167401 | 636.3106635 | 642.4889107 | 648.5989463 | -0.351497022 | 0.931435394 | 0.7451386 |
| B7L4M2 | TY-2482_chromosome | - | 2714758 | 2715477 | 1005.092388  | 913.0838435 | 1071.092786 | 1505.055988 | 1529.766931 | 1690.389382 | -0.601574496 | 2.866275396 | 2.4412135 |
| B7L4M3 | TY-2482_chromosome | - | 2715647 | 2716456 | 4910.82878   | 5738.277281 | 5658.966992 | 11153.82032 | 11863.4802  | 10242.2949  | -1.060580829 | 2.076309438 | 1.7385622 |
| B7L4M4 | TY-2482_chromosome | + | 2716677 | 2716892 | 219.1187143  | 228.6917375 | 203.153176  | 179.0876248 | 254.147016  | 138.8135027 | 0.13237399   | 0.37974366  | 0.2882475 |
| B7L4M0 | TY-2482_chromosome | - | 2716947 | 2717534 | 7785.642497  | 8075.37255  | 8473.559032 | 10813.56562 | 11746.08118 | 10461.93092 | -0.43897403  | 0.587307311 | 0.4561068 |
| B7L4M6 | TY-2482_chromosome | - | 2717632 | 2717829 | 261.6298695  | 265.8170481 | 293.9837633 | 278.2819951 | 308.5398192 | 292.1005263 | -0.071669075 | 0.200792724 | 0.1482582 |
| B7L4M7 | TY-2482_chromosome | - | 2717842 | 2719644 | 447.6744168  | 537.7946346 | 549.5041613 | 414.8176254 | 452.2975094 | 473.487968  | 0.201040035  | 0.470640367 | 0.3600718 |
| B7L4M8 | TY-2482_chromosome | - | 2719647 | 2720198 | 224.8824435  | 274.4388211 | 248.8799849 | 138.6693816 | 193.9202356 | 187.9462961 | 0.528323017  | 1.851124593 | 1.5431602 |
| B7L4M9 | TY-2482_chromosome | + | 2720326 | 2722236 | 1058.275504  | 961.5511963 | 1009.469173 | 1266.856109 | 968.1237745 | 1490.057239 | -0.253127529 | 0.771128356 | 0.6109197 |
| B7L4M5 | TY-2482_chromosome | + | 2722239 | 2723258 | 553.3875134  | 548.8429228 | 551.9308051 | 468.4752034 | 517.7741715 | 649.4137973 | 0.071419849  | 0.027593501 | 0.018361  |
| B7L4N1 | TY-2482_chromosome | + | 2723255 | 2723470 | 299.9184415  | 310.978284  | 266.4633638 | 149.994525  | 186.606271  | 185.3614923 | 0.748910977  | 3.584020365 | 3.0812239 |
| B7L4N2 | TY-2482_chromosome | + | 2723527 | 2724393 | 864.6810797  | 773.1971872 | 738.5796336 | 672.4224752 | 614.2035618 | 756.2025732 | 0.241035409  | 0.55316487  | 0.4278453 |
| B7L4N3 | TY-2482_chromosome | - | 2724454 | 2724855 | 849.277512   | 1016.791136 | 1017.567399 | 746.9966766 | 993.9104688 | 788.2531016 | 0.180590874  | 0.461059831 | 0.3523094 |
| B7L4N4 | TY-2482_chromosome | + | 2724935 | 2725147 | 1659.282967  | 1843.955163 | 1848.736961 | 939.9379336 | 1292.386436 | 1132.743757 | 0.688890658  | 2.825496695 | 2.4049496 |
| B7L4N0 | TY-2482_chromosome | + | 2725157 | 2725786 | 5722.409567  | 5464.242678 | 6242.054902 | 5248.314875 | 5918.095569 | 5776.828108 | 0.087535508  | 0.038913752 | 0.0265085 |
| B7L4N6 | TY-2482_chromosome | + | 2725828 | 2727927 | 1526.434831  | 1460.516771 | 1361.860346 | 1235.588591 | 1388.725005 | 1575.784039 | 0.081932774  | 0.092286507 | 0.067821  |
| B7L4N7 | TY-2482_chromosome | - | 2728000 | 2729217 | 267.2270778  | 210.1531135 | 231.6533901 | 206.6099063 | 210.1655811 | 260.1171023 | 0.146395057  | 0.132370992 | 0.0967914 |
| B7L4N8 | TY-2482_chromosome | - | 2729306 | 2729866 | 223.4407501  | 276.3927528 | 222.9336376 | 175.8650109 | 185.6528321 | 188.0918415 | 0.338248985  | 1.245133756 | 1.0135987 |
| B7L4N5 | TY-2482_chromosome | - | 2729901 | 2730500 | 739.4073421  | 819.0845931 | 870.3825692 | 418.3347357 | 396.743419  | 427.5159379 | 0.970544186  | 5.708420482 | 5.0353986 |
| B7L4P1 | TY-2482_chromosome | - | 2730765 | 2731334 | 834.6092162  | 743.1809527 | 876.9730627 | 1269.691929 | 1701.006793 | 1426.225733 | -0.777217655 | 4.108007072 | 3.5589144 |
| B7L4N9 | TY-2482_chromosome | + | 2731605 | 2732783 | 132.3086302  | 153.0803143 | 121.189896  | 310.2391457 | 292.8998028 | 467.5317981 | -1.388757421 | 8.905881368 | 8.031153  |
| B7L4P3 | TY-2482_chromosome | + | 2733048 | 2735588 | 48503.18896  | 52064.93825 | 54087.21903 | 1181.999884 | 579.4681045 | 775.1459428 | 5.848777494  | 28.40924315 | 26.937418 |
| B7L4P4 | TY-2482_chromosome | + | 2735588 | 2735911 | 4437.542176  | 4595.634019 | 5008.722975 | 113.6948485 | 60.77456711 | 89.45466801 | 5.700070071  | 37.56050757 | 35.878886 |
| B7L4P5 | TY-2482_chromosome | + | 2736041 | 2736844 | 1899.253483  | 2268.561851 | 2236.989777 | 169.4373517 | 100.8374184 | 136.8332268 | 3.91157589   | 55.70493351 | 53.708346 |
| B7L4P2 | TY-2482_chromosome | + | 2736866 | 2738236 | 1226.960256  | 1503.067336 | 1379.884838 | 723.1299258 | 638.7839552 | 734.002397  | 0.931608448  | 5.546882714 | 4.8871026 |
| B7L4P9 | TY-2482_chromosome | + | 2740306 | 2741325 | 55.5289939   | 33.75012864 | 55.72538578 | 45.75430237 | 34.5307911  | 31.87340451 | 0.436953451  | 0.83336626  | 0.662734  |
| B7L4Q0 | TY-2482_chromosome | + | 2741378 | 2742205 | 39.50401961  | 45.81487359 | 42.90793658 | 57.30472187 | 39.89662763 | 61.51820315 | -0.326025582 | 0.663936927 | 0.5195362 |
| B7L4P6 | TY-2482_chromosome | + | 2742205 | 2742987 | 43.2483999   | 57.16934377 | 40.64380102 | 57.95467832 | 42.64831239 | 60.28516864 | -0.277822109 | 0.362566281 | 0.2741137 |
| B5YTT2 | TY-2482_chromosome | + | 2743024 | 2743818 | 253.7913262  | 177.6886328 | 233.1684875 | 166.0722672 | 152.8131542 | 189.1772092 | 0.489281187  | 1.18504109  | 0.9622385 |

|               |                    |   |         |         |             |             |              |             |             |             |              |              |           |
|---------------|--------------------|---|---------|---------|-------------|-------------|--------------|-------------|-------------|-------------|--------------|--------------|-----------|
| <b>B7L4Q3</b> | TY-2482_chromosome | - | 2743976 | 2745058 | 54.53622865 | 56.64610267 | 56.10928261  | 51.20917465 | 45.43297307 | 56.37963717 | 0.135527588  | 0.218983797  | 0.1618067 |
| <b>B7L4Q4</b> | TY-2482_chromosome | - | 2745073 | 2746374 | 35.0348961  | 48.91721086 | 30.64376456  | 62.80249084 | 41.73461515 | 53.92830666 | -0.612114337 | 1.162317456  | 0.9445099 |
| <b>B7L4Q9</b> | TY-2482_chromosome | - | 2750101 | 2750460 | 29.06806997 | 39.13850698 | 26.0954592   | 50.94358447 | 37.22922655 | 40.91049684 | -0.586352448 | 1.075726387  | 0.8684772 |
| <b>B7L4Q6</b> | TY-2482_chromosome | - | 2750480 | 2751382 | 69.28764188 | 91.3469388  | 81.21568508  | 170.6990664 | 126.4276742 | 118.7745546 | -0.891091998 | 3.510418676  | 3.0154259 |
| <b>B7L4R1</b> | TY-2482_chromosome | - | 2751654 | 2752655 | 2630.708306 | 2987.426361 | 2940.088856  | 3740.521904 | 3566.409214 | 4554.257893 | -0.456456196 | 0.715674058  | 0.563104  |
| <b>B7L4R0</b> | TY-2482_chromosome | - | 2752651 | 2753406 | 1495.584685 | 1543.080347 | 1602.467495  | 2168.470094 | 1736.219325 | 2622.782563 | -0.457648265 | 1.240990334  | 1.0097795 |
| <b>B7L4R3</b> | TY-2482_chromosome | - | 2753402 | 2754076 | 1400.600699 | 1521.809777 | 1442.560219  | 2106.7596   | 1752.627217 | 2436.093956 | -0.525802873 | 1.931542845  | 1.6114498 |
| <b>B7L4R4</b> | TY-2482_chromosome | - | 2754097 | 2754930 | 1233.961441 | 1220.915958 | 1167.170059  | 1444.681139 | 1388.679653 | 1632.436926 | -0.29012636  | 0.851087243  | 0.677463  |
| <b>B7L4R2</b> | TY-2482_chromosome | - | 2755040 | 2756323 | 3727.346113 | 3308.253091 | 3490.617783  | 5690.361717 | 5350.105801 | 6867.112365 | -0.712625639 | 1.39313661   | 1.1428783 |
| <b>B7L4R5</b> | TY-2482_chromosome | - | 2756418 | 2757503 | 2517.974946 | 2342.361467 | 2616.630296  | 3531.842721 | 3282.493919 | 3780.907644 | -0.463709282 | 0.801908186  | 0.6374126 |
| <b>C3SQ92</b> | TY-2482_chromosome | - | 2757563 | 2758282 | 1965.395829 | 1806.328967 | 1877.009753  | 2377.871612 | 2551.804965 | 2462.858886 | -0.365118782 | 0.655927811  | 0.5129853 |
| <b>B7L4R8</b> | TY-2482_chromosome | - | 2758485 | 2759720 | 53.71899158 | 54.66856224 | 62.92738292  | 58.66168476 | 37.13636187 | 64.06286378 | 0.132312891  | 0.160248616  | 0.1173785 |
| <b>B7L4S2</b> | TY-2482_chromosome | - | 2760992 | 2761768 | 60.69676624 | 58.952377   | 49.21406103  | 62.74596311 | 50.92212295 | 47.62336794 | -0.001356673 | 0.07131043   | 0.051252  |
| <b>B7L4S0</b> | TY-2482_chromosome | + | 2761888 | 2764437 | 757.0327597 | 627.1110303 | 660.7768112  | 1163.436096 | 1211.233172 | 1448.138972 | -0.836206625 | 5.196118046  | 4.5575479 |
| <b>B7L4S4</b> | TY-2482_chromosome | - | 2764611 | 2765168 | 678.1216933 | 799.8845053 | 708.9864851  | 691.1984451 | 840.0376952 | 788.0272391 | -0.1062343   | 0.174082176  | 0.1282612 |
| <b>B7L4S5</b> | TY-2482_chromosome | + | 2765488 | 2767620 | 783.0047324 | 795.6017007 | 730.0441067  | 988.9922938 | 1011.074899 | 974.9426597 | -0.386017657 | 0.1278644299 | 1.0254445 |
| <b>D3GZL7</b> | TY-2482_chromosome | + | 2767643 | 2768353 | 623.8874861 | 531.6034699 | 549.851862   | 790.5095355 | 888.2511324 | 830.199079  | -0.52395501  | 2.255804912  | 1.8981402 |
| <b>B7L4S3</b> | TY-2482_chromosome | + | 2768367 | 2768765 | 493.78258   | 400.6941404 | 442.9678302  | 715.2325989 | 577.7500558 | 791.6438342 | -0.58461769  | 2.534875977  | 2.1469072 |
| <b>B5YTV0</b> | TY-2482_chromosome | + | 2768787 | 2769668 | 938.0154612 | 730.8322032 | 859.6533041  | 1512.280116 | 1516.106001 | 1719.296004 | -0.832287061 | 4.919986557  | 4.304396  |
| <b>B7L4S9</b> | TY-2482_chromosome | - | 2769809 | 2771530 | 318.6085136 | 272.1581111 | 340.9268989  | 234.6685836 | 191.9341438 | 220.989933  | 0.570040563  | 2.02231659   | 1.6905342 |
| <b>B7L4T1</b> | TY-2482_chromosome | + | 2771909 | 2773528 | 9661.420269 | 9080.065452 | 8874.082366  | 7882.145314 | 5665.79027  | 8971.966261 | 0.316443389  | 0.342983304  | 0.2583633 |
| <b>B7L4T2</b> | TY-2482_chromosome | + | 2773648 | 2773962 | 176.4733633 | 177.7533791 | 174.2452941  | 83.30700042 | 99.29491667 | 74.00035958 | 1.023539572  | 6.709188981  | 5.9710094 |
| <b>B7L4T3</b> | TY-2482_chromosome | + | 2774024 | 2774317 | 334.4443565 | 331.4357667 | 259.6734634  | 120.0143413 | 157.6068186 | 101.781902  | 1.22485118   | 8.177904574  | 7.3413806 |
| <b>B7L4T4</b> | TY-2482_chromosome | - | 2774353 | 2775702 | 1383.601304 | 1244.93341  | 1305.903125  | 1169.097224 | 927.2104829 | 1239.019299 | 0.266302155  | 0.602513523  | 0.4688604 |
| <b>B7L4S7</b> | TY-2482_chromosome | - | 2775702 | 2776418 | 2180.663263 | 2053.920805 | 2348.636039  | 1731.109057 | 1475.986284 | 1971.73612  | 0.398342869  | 0.725494248  | 0.5717056 |
| <b>Q1R5M9</b> | TY-2482_chromosome | - | 2776511 | 2776693 | 191.3135868 | 225.3966546 | 192.6263973  | 129.516247  | 154.8959768 | 79.72721846 | 0.636203237  | 2.888764387  | 2.4611431 |
| <b>B7L4T6</b> | TY-2482_chromosome | + | 2776646 | 2777119 | 366.5402647 | 320.500548  | 352.5837258  | 252.4490923 | 258.5442476 | 174.2661095 | 0.582617905  | 2.289315832  | 1.9294775 |
| <b>B7L4T7</b> | TY-2482_chromosome | + | 2777219 | 2779537 | 1024.5717   | 971.5953396 | 1003.53884   | 1807.855953 | 1514.178793 | 2255.704107 | -0.846623127 | 4.505382236  | 3.9244934 |
| <b>B7L4T5</b> | TY-2482_chromosome | + | 2779978 | 2780202 | 2910.561824 | 2982.626662 | 2864.015012  | 45.05824317 | 43.60011399 | 62.65980862 | 5.889806738  | 105.0158558  | 102.05548 |
| <b>B7L4T8</b> | TY-2482_chromosome | + | 2780222 | 2782588 | 11549.57661 | 11514.23462 | 12017.64902  | 549.3245324 | 393.8966224 | 539.1827318 | 4.566232615  | 24.04906119  | 22.659228 |
| <b>B7L4U0</b> | TY-2482_chromosome | + | 2782591 | 2782824 | 778.4379699 | 808.6853506 | 794.2362224  | 47.94725837 | 54.68882942 | 38.52856974 | 4.040536471  | 61.72009262  | 59.604815 |
| <b>B7L4U1</b> | TY-2482_chromosome | + | 2783030 | 2783905 | 125.6062012 | 128.7027333 | 124.7246733  | 61.71151046 | 64.63754594 | 58.03206914 | 1.022351427  | 6.776233731  | 6.0343936 |
| <b>B7L4T9</b> | TY-2482_chromosome | - | 2783940 | 2784707 | 452.998773  | 512.206461  | 514.4204068  | 543.0414163 | 577.001372  | 532.9375456 | -0.174631091 | 0.374724607  | 0.2842844 |
| <b>B5YTW4</b> | TY-2482_chromosome | + | 2784682 | 2785425 | 452.4137015 | 430.954286  | 478.1349154  | 386.4851253 | 454.1477086 | 455.0853322 | 0.122764351  | 0.141175175  | 0.1034206 |
| <b>B7L4U4</b> | TY-2482_chromosome | + | 2785487 | 2786059 | 993.9316019 | 993.9341931 | 895.71143097 | 2945.06021  | 3287.092005 | 3712.356102 | -1.767789305 | 8.428368323  | 7.565577  |
| <b>B7L4U2</b> | TY-2482_chromosome | + | 2786423 | 2787736 | 403.7662185 | 462.1913982 | 374.0616094  | 725.8768545 | 591.4331945 | 707.6963059 | -0.77139057  | 3.210137608  | 2.7466916 |
| <b>B7L4U5</b> | TY-2482_chromosome | - | 2787787 | 2789868 | 4643.153025 | 5241.271521 | 5139.978389  | 16432.14856 | 9103.935962 | 12754.91427 | -1.418469566 | 3.05193378   | 2.6063714 |
| <b>B7L4U7</b> | TY-2482_chromosome | - | 2789881 | 2792271 | 12575.59137 | 13100.46081 | 12884.46208  | 37567.4869  | 21514.31708 | 29927.60889 | -1.26089251  | 2.338504235  | 1.9738452 |
| <b>B7L4U8</b> | TY-2482_chromosome | + | 2792883 | 2795585 | 10675.40253 | 10877.39259 | 10149.64572  | 13144.76244 | 10109.65984 | 11378.81865 | -0.17001749  | 0.126440595  | 0.0928189 |
| <b>B7L4U9</b> | TY-2482_chromosome | - | 2795634 | 2796647 | 378.5099218 | 343.2312434 | 350.500282   | 220.8057432 | 184.653369  | 218.2914452 | 0.792312726  | 3.965963008  | 3.4275202 |
| <b>B7L4U6</b> | TY-2482_chromosome | - | 2796654 | 2797877 | 62.02298636 | 62.10185974 | 64.74099867  | 85.46523896 | 72.72734602 | 86.71606353 | -0.366937593 | 1.068723205  | 0.8620012 |
| <b>B7L4V1</b> | TY-2482_chromosome | + | 2798066 | 2799661 | 135.7319756 | 87.58219616 | 113.5397231  | 125.6991816 | 108.2586204 | 105.4373246 | 0.046816719  | 0            | 0         |
| <b>B7L4V2</b> | TY-2482_chromosome | - | 2799649 | 2800404 | 329.7325177 | 312.7112543 | 366.6576253  | 468.6172158 | 501.4113334 | 574.6346073 | -0.545782168 | 2.489364271  | 2.1067102 |
| <b>B7L4V0</b> | TY-2482_chromosome | - | 2800424 | 2801251 | 397.0997103 | 396.7104004 | 387.4845915  | 552.6481055 | 634.3240484 | 655.0212732 | -0.617530533 | 2.813408449  | 2.3946625 |
| <b>B7L4V4</b> | TY-2482_chromosome | - | 2801299 | 2801622 | 97.26456607 | 102.1970025 | 83.5464231   | 190.5845297 | 278.6157032 | 230.2892767 | -1.31570694  | 8.775693191  | 7.9094392 |
| <b>B7L4V5</b> | TY-2482_chromosome | + | 2801812 | 2803314 | 353.7787634 | 325.3131295 | 346.6323763  | 25611.44924 | 28030.51021 | 27897.56604 | -6.277201776 | 35.39220028  | 33.758161 |
| <b>B7L4V6</b> | TY-2482_chromosome | - | 2803372 | 2803974 | 17.14480064 | 25.63643305 | 12.76683108  | 334.875174  | 351.3020272 | 327.6937653 | -4.338324392 | 55.76872621  | 55.762593 |
| <b>B7L4V3</b> | TY-2482_chromosome | - | 2803980 | 2804744 | 14.93221842 | 19.18835335 | 12.26528224  | 30.02334085 | 32.75640802 | 35.39875908 | -1.14776076  | 3.329482607  | 2.8513238 |
| <b>B7L4V9</b> | TY-2482_chromosome | - | 2805476 | 2806990 | 17.95108971 | 19.9519517  | 15.65078748  | 33.0868201  | 50.18260955 | 38.27969135 | -1.204177611 | 4.15178563   | 3.5989708 |
| <b>B7L4V7</b> | TY-2482_chromosome | - | 2807109 | 2809553 | 1930.879066 | 1967.920902 | 1947.662769  | 5092.887192 | 4599.320106 | 5549.032508 | -1.373562241 | 3.780791823  | 3.255942  |
| <b>B7L4W1</b> | TY-2482_chromosome | - | 2809575 | 2811005 | 1654.272107 | 1528.200025 | 1618.900985  | 2068.970567 | 1951.015882 | 3017.22958  | -0.467931306 | 1.377398421  | 1.1295041 |
| <b>B7L4W0</b> | TY-2482_chromosome | - | 2811008 | 2812300 | 1219.011246 | 1095.897158 | 1251.271064  | 1342.535477 | 1091.827862 | 2319.42393  | -0.280933991 | 1.045978387  | 0.8417823 |
| <b>B7L4W3</b> | TY-2482_chromosome | - | 2812321 | 2814291 | 1512.234394 | 1416.961677 | 1363.218958  | 1990.200811 | 1986.553559 | 2693.807869 | -0.585429659 | 1.987180625  | 1.660879  |
| <b>B7L4W4</b> | TY-2482_chromosome | - | 2814291 | 2816474 | 2215.177845 | 2107.224685 | 2034.698925  | 2777.761782 | 2335.941195 | 3696.167266 | -0.423723615 | 0.7249712    | 0.5713181 |
| <b>B7L4W2</b> | TY-2482_chromosome | - | 2816750 | 2817850 | 2562.080076 | 2473.354816 | 2633.077229  | 3303.135465 | 3002.144119 | 4196.275485 | -0.39829633  | 0.681822983  | 0.5349285 |
| <b>B7L4W6</b> | TY-2482_chromosome | + | 2818043 | 2818633 | 105.5982744 | 58.19260316 | 121.4684365  | 145.7137918 | 124.5593181 | 175.8558223 | -0.452995462 | 2.063449214  | 1.7277681 |
| <b>B7L4W7</b> | TY-2482_chromosome | - | 2818696 | 2820033 | 161.8345689 | 139.2567873 | 117.7496094  | 122.02749   | 120.084123  | 137.9476539 | 0.147693196  | 0.300263692  | 0.2246834 |

|               |                    |   |         |         |             |             |             |              |              |             |              |             |           |
|---------------|--------------------|---|---------|---------|-------------|-------------|-------------|--------------|--------------|-------------|--------------|-------------|-----------|
| <b>Q8FCR0</b> | TY-2482_chromosome | + | 2820091 | 2820720 | 157.1044344 | 130.5015422 | 163.9408453 | 83.80112573  | 97.40498219  | 95.9749686  | 0.78311737   | 3.348490282 | 2.8684091 |
| <b>B7L4W9</b> | TY-2482_chromosome | - | 2820706 | 2821698 | 1355.132676 | 1227.09813  | 1356.851895 | 514.4642449  | 558.7196737  | 708.6095727 | 1.226479251  | 7.97320914  | 7.1564727 |
| <b>B7L4X0</b> | TY-2482_chromosome | - | 2821925 | 2822617 | 772.5597488 | 744.6503706 | 734.7515884 | 917.4123037  | 863.5853962  | 976.0430608 | -0.28100517  | 0.89206826  | 0.7128837 |
| <b>B7L4X1</b> | TY-2482_chromosome | + | 2822743 | 2823777 | 2272.792341 | 2040.837142 | 2122.595041 | 2845.619241  | 2571.736846  | 2965.252844 | -0.356119007 | 0.561696177 | 0.434802  |
| <b>B7L4X2</b> | TY-2482_chromosome | + | 2824109 | 2824594 | 146.2644448 | 182.2778553 | 187.7335889 | 30.42712392  | 27.29995121  | 22.64355013 | 2.625154563  | 30.86717946 | 29.353962 |
| <b>B7L4X7</b> | TY-2482_chromosome | - | 2827278 | 2829017 | 655.7445614 | 675.1734093 | 721.7686486 | 1058.408651  | 1028.277281  | 1328.332083 | -0.687542698 | 3.697166318 | 3.1802101 |
| <b>B7L4X3</b> | TY-2482_chromosome | + | 2829137 | 2829574 | 634.955143  | 661.1700745 | 557.5941344 | 303.6054132  | 266.5989586  | 273.7444656 | 1.080124641  | 7.539248053 | 6.7549637 |
| <b>B7L5Q2</b> | TY-2482_chromosome | - | 2829567 | 2830307 | 421.7530723 | 422.5852206 | 425.1765567 | 378.5147088  | 302.9477425  | 357.7877389 | 0.277937014  | 0.805223275 | 0.6401714 |
| <b>B7L5Q3</b> | TY-2482_chromosome | - | 2830307 | 2831374 | 224.4218084 | 206.6720625 | 213.2055871 | 168.381645   | 120.8888621  | 168.1682036 | 0.504870181  | 1.780293058 | 1.4802882 |
| <b>B7L5Q4</b> | TY-2482_chromosome | - | 2831379 | 2832221 | 30.5974415  | 26.99504282 | 35.90204653 | 38.11484364  | 27.27926951  | 17.68916155 | 0.131787916  | 0.239077661 | 0.1772078 |
| <b>B7L5Q6</b> | TY-2482_chromosome | - | 2833206 | 2834519 | 56.07555391 | 61.04325101 | 51.28670216 | 80.23962248  | 68.18339854  | 78.87281447 | -0.475738799 | 1.289919423 | 1.0518486 |
| <b>B7L5Q7</b> | TY-2482_chromosome | - | 2834918 | 2835628 | 43.99099255 | 50.9350501  | 47.52272107 | 37.03827003  | 27.2137332   | 32.893782   | 0.504729625  | 1.46320057  | 1.202836  |
| <b>B7L5Q8</b> | TY-2482_chromosome | - | 2835633 | 2836397 | 37.71653461 | 60.14271497 | 55.66096534 | 38.24573985  | 32.71832313  | 34.27741821 | 0.466864048  | 1.358481677 | 1.1129386 |
| <b>B7L5Q9</b> | TY-2482_chromosome | - | 2836397 | 2837671 | 49.91282183 | 65.37858019 | 53.35762225 | 47.33785015  | 39.96515964  | 49.83980812 | 0.237514045  | 0.613856485 | 0.478907  |
| <b>E9VUM2</b> | TY-2482_chromosome | - | 2838590 | 2839718 | 42.54969475 | 50.36432931 | 40.74291718 | 43.13801168  | 33.64111908  | 28.00598655 | 0.237691855  | 0.673583465 | 0.5277218 |
| <b>B7L5R2</b> | TY-2482_chromosome | + | 2840175 | 2840555 | 408.3651659 | 419.2253296 | 361.535542  | 309.8985389  | 386.9400668  | 247.8945005 | 0.273951043  | 0.87506983  | 0.7173046 |
| <b>B7L5R3</b> | TY-2482_chromosome | - | 2840760 | 2841860 | 104.4884521 | 134.7638449 | 110.7748472 | 112.4065072  | 99.13945418  | 109.1733429 | 0.053712357  | 0.230507179 | 0.1709355 |
| <b>B7L5R4</b> | TY-2482_chromosome | - | 2842134 | 2842985 | 5326.791128 | 5463.370342 | 5522.882717 | 5146.62587   | 5510.380416  | 5350.6244   | 0.03332565   | 0.025950562 | 0.017495  |
| <b>B7L5R5</b> | TY-2482_chromosome | - | 2843233 | 2844288 | 930.2437814 | 1019.179399 | 904.3517483 | 1199.65259   | 1196.667446  | 1406.115847 | -0.422649454 | 1.341570982 | 1.0985329 |
| <b>B7L5R6</b> | TY-2482_chromosome | - | 2844284 | 2844949 | 739.5751386 | 719.2484212 | 776.5304994 | 1297.604237  | 1250.3609829 | 1422.000644 | -0.79660661  | 4.327673099 | 3.7610481 |
| <b>B7L5R0</b> | TY-2482_chromosome | - | 2844955 | 2846445 | 1172.34067  | 1413.37585  | 1399.167983 | 2361.016487  | 1965.600884  | 2492.847957 | -0.791001835 | 3.666101002 | 3.1541225 |
| <b>B7L5R8</b> | TY-2482_chromosome | + | 2846595 | 2847188 | 498.737801  | 515.1805586 | 518.2990703 | 358.2731401  | 400.4234487  | 430.0039461 | 0.393000025  | 1.172007614 | 0.9523104 |
| <b>B7L5R7</b> | TY-2482_chromosome | - | 2847456 | 2847812 | 258.0533723 | 235.2501537 | 254.8810074 | 166.8990122  | 265.9345958  | 193.6029811 | 0.305821495  | 0.633808042 | 0.4946838 |
| <b>B7L5S0</b> | TY-2482_chromosome | + | 2847953 | 2848576 | 1480.958304 | 1201.712452 | 1295.283708 | 610.3879354  | 718.9633159  | 747.0791296 | 1.007676399  | 5.153246311 | 4.5187966 |
| <b>B7L5S2</b> | TY-2482_chromosome | + | 2848653 | 2850848 | 2048.4154   | 1809.352445 | 2005.181236 | 1419.403857  | 1082.823095  | 1431.162698 | 0.607005414  | 2.22142087  | 1.8691432 |
| <b>A1AH06</b> | TY-2482_chromosome | + | 2850914 | 2851213 | 195.2354331 | 173.6726797 | 196.1703588 | 85.67241639  | 112.9383982  | 97.41010365 | 0.986934102  | 5.462811813 | 4.8069267 |
| <b>B7L5S4</b> | TY-2482_chromosome | + | 2851419 | 2852081 | 120.5529601 | 124.8825899 | 88.60405972 | 58.46028201  | 53.64563122  | 60.43788959 | 0.891384919  | 4.726805073 | 4.1236017 |
| <b>C8TJR1</b> | TY-2482_chromosome | + | 2852115 | 2852711 | 3297.938799 | 3297.239642 | 3343.428196 | 4103.6589629 | 5278.455279  | 5278.788635 | -0.411032596 | 0.568034537 | 0.4396206 |
| <b>B7L5S6</b> | TY-2482_chromosome | - | 2852721 | 2853935 | 893.7230666 | 880.7897241 | 815.8631747 | 358.3777997  | 360.33335    | 423.3534673 | 1.195007171  | 8.074829129 | 7.2467132 |
| <b>B7L5S3</b> | TY-2482_chromosome | + | 2854067 | 2855113 | 304.1447705 | 389.6303976 | 321.3708117 | 232.2640946  | 270.3413442  | 244.7753144 | 0.383200817  | 1.443654862 | 1.1866756 |
| <b>B7L5S7</b> | TY-2482_chromosome | + | 2855171 | 2855755 | 236.8177626 | 287.6106522 | 276.0514716 | 274.2047524  | 349.5651303  | 289.587377  | -0.209184921 | 0.44354867  | 0.3389344 |
| <b>B7L5S8</b> | TY-2482_chromosome | + | 2855869 | 2857440 | 969.4334213 | 804.7610637 | 831.0817412 | 49.02456744  | 38.05058788  | 75.46356458 | 4.093854802  | 53.79023992 | 51.838464 |
| <b>B7L5T0</b> | TY-2482_chromosome | + | 2857443 | 2858384 | 524.4482136 | 431.4340331 | 462.7324619 | 40.10241605  | 34.51526915  | 41.97465588 | 3.64134235   | 52.15683261 | 50.229881 |
| <b>B7L5T1</b> | TY-2482_chromosome | + | 2858384 | 2859214 | 406.2077474 | 351.380811  | 378.9446633 | 37.32631936  | 37.28375284  | 41.97251561 | 3.327973735  | 45.43136504 | 43.635342 |
| <b>B7L5T2</b> | TY-2482_chromosome | + | 2859217 | 2859968 | 436.1929366 | 369.3110196 | 378.830025  | 45.50346467  | 40.01634987  | 38.31851013 | 3.253948477  | 44.15300558 | 42.362892 |
| <b>B7L5S9</b> | TY-2482_chromosome | + | 2859978 | 2860781 | 273.1214485 | 230.4135921 | 249.5197502 | 69.22602978  | 57.28281319  | 58.03604659 | 2.032926956  | 21.39717041 | 20.080247 |
| <b>B7L5T4</b> | TY-2482_chromosome | + | 2860790 | 2861188 | 202.6054256 | 218.3627589 | 199.267355  | 86.32819308  | 108.3499465  | 103.8553523 | 1.056762135  | 6.86477391  | 6.1165859 |
| <b>B7L5T5</b> | TY-2482_chromosome | - | 2861314 | 2861670 | 301.4246733 | 296.1776651 | 279.1265983 | 116.6097671  | 166.7407135  | 104.4072715 | 1.157949395  | 7.237994744 | 6.4690701 |
| <b>C6UWI3</b> | TY-2482_chromosome | - | 2861670 | 2861942 | 246.8258913 | 247.0383153 | 226.2761036 | 86.89028896  | 129.3857935  | 97.53701232 | 1.200880464  | 7.914213866 | 7.0999663 |
| <b>B7L5T6</b> | TY-2482_chromosome | - | 2862004 | 2863125 | 510.3815035 | 420.4326684 | 374.5961209 | 122.4178346  | 133.7299439  | 170.5507867 | 1.667740964  | 12.46509423 | 11.417472 |
| <b>B7L5T7</b> | TY-2482_chromosome | - | 2863128 | 2865860 | 721.1663384 | 646.5656418 | 558.1614312 | 240.4747657  | 169.9932149  | 277.069218  | 1.493109262  | 10.21279582 | 9.2760841 |
| <b>B7L5T3</b> | TY-2482_chromosome | - | 2865860 | 2866924 | 571.3362166 | 541.6856458 | 593.6480835 | 189.1898295  | 160.0709466  | 202.3744894 | 1.660984773  | 14.05418089 | 12.946285 |
| <b>B7L5U4</b> | TY-2482_chromosome | + | 2871182 | 2872231 | 46.2470668  | 44.75236323 | 55.73473246 | 94.177010076 | 72.70710076  | 86.79890753 | -0.763587732 | 3.233829306 | 2.7670511 |
| <b>B7L5U5</b> | TY-2482_chromosome | - | 2872897 | 2873361 | 65.9262976  | 55.17761761 | 61.38301353 | 42.51825036  | 45.49579055  | 48.5693591  | 0.471328825  | 1.182404775 | 0.9603339 |
| <b>B7L5U2</b> | TY-2482_chromosome | - | 2873549 | 2874946 | 259.4254582 | 317.060142  | 225.3532036 | 248.2077681  | 255.7377526  | 242.1670735 | 0.009440027  | 0.19288647  | 0.1422808 |
| <b>B7L5U7</b> | TY-2482_chromosome | - | 2874946 | 2875629 | 216.7187785 | 261.2605747 | 219.6845258 | 236.5206806  | 211.9889276  | 230.214576  | -0.021397992 | 0.058327176 | 0.0413471 |
| <b>B7L5U8</b> | TY-2482_chromosome | - | 2875681 | 2876607 | 265.187511  | 346.1772379 | 309.6520931 | 285.6194293  | 296.6906188  | 282.9329363 | 0.03636043   | 0.171065234 | 0.1264059 |
| <b>B7L5U9</b> | TY-2482_chromosome | - | 2876615 | 2876992 | 278.0164894 | 308.9046914 | 317.0340058 | 246.0592673  | 287.6375764  | 256.6375025 | 0.195317125  | 0.472902275 | 0.3619461 |
| <b>B7L5V0</b> | TY-2482_chromosome | - | 2877035 | 2877931 | 189.011138  | 211.0841576 | 220.0106862 | 160.3250494  | 150.1333515  | 151.3641245 | 0.411826875  | 1.508904783 | 1.2426076 |
| <b>B7L5V1</b> | TY-2482_chromosome | - | 2877931 | 2879751 | 448.9129054 | 382.0963941 | 384.7436694 | 271.0941237  | 292.1463993  | 281.5682602 | 0.55114838   | 2.049559022 | 1.7147016 |
| <b>B7L5V2</b> | TY-2482_chromosome | + | 2880718 | 2881452 | 128.0383635 | 106.7562909 | 116.1468756 | 183.7338026  | 214.8513106  | 177.8197562 | -0.6845371   | 3.400980907 | 2.9177265 |
| <b>A4Y217</b> | TY-2482_chromosome | - | 2881492 | 2881686 | 69.23419115 | 82.60468272 | 96.79340029 | 90.49396687  | 109.3060474  | 83.17775894 | -0.182405611 | 0.403131089 | 0.3058403 |
| <b>B7L5V4</b> | TY-2482_chromosome | - | 2881730 | 2884174 | 500.2155959 | 542.9556031 | 507.6421367 | 697.5308712  | 568.6610997  | 746.9862579 | -0.389765205 | 1.157699483 | 0.940206  |
| <b>B7L5V5</b> | TY-2482_chromosome | - | 2884304 | 2884747 | 219.1592513 | 211.420799  | 207.2159268 | 246.8039821  | 284.0119549  | 235.7183431 | -0.269720504 | 0.731122223 | 0.5757034 |
| <b>B7L5V6</b> | TY-2482_chromosome | - | 2884831 | 2887974 | 672.3854394 | 611.2487608 | 644.3674625 | 757.3050042  | 605.9639917  | 814.0582961 | -0.145352118 | 0.403350082 | 0.3058489 |
| <b>B7L5V7</b> | TY-2482_chromosome | - | 2887988 | 2889277 | 252.0725289 | 222.713084  | 254.9526538 | 335.1131574  | 285.6862897  | 315.7447521 | -0.333476349 | 1.149315753 | 0.9319793 |
| <b>B7L5V3</b> | TY-2482_chromosome | - | 2889394 | 2889744 | 75.21290013 | 90.26888258 | 104.7086822 | 124.7065442  | 129.2333782  | 126.3336912 | -0.479734903 | 1.768354646 | 1.470548  |

|               |                    |   |         |         |             |             |             |             |             |             |              |             |           |
|---------------|--------------------|---|---------|---------|-------------|-------------|-------------|-------------|-------------|-------------|--------------|-------------|-----------|
| <b>B7L5V8</b> | TY-2482_chromosome | - | 2889775 | 2891460 | 335.6144627 | 393.0552959 | 354.4697089 | 272.5600567 | 281.2349523 | 250.1634524 | 0.379128692  | 1.452768678 | 1.1937883 |
| <b>B7L5W2</b> | TY-2482_chromosome | + | 2892020 | 2893498 | 654.240912  | 718.1454292 | 684.6318738 | 388.1150793 | 367.6184888 | 401.182139  | 0.814675756  | 4.447116827 | 3.8732607 |
| <b>B7L5W1</b> | TY-2482_chromosome | + | 2893629 | 2894174 | 156.3137301 | 145.0323917 | 158.5161556 | 80.78793085 | 83.75166024 | 73.8583739  | 0.95905073   | 5.846328086 | 5.1624143 |
| <b>B7L5W0</b> | TY-2482_chromosome | + | 2894325 | 2894672 | 4347.775773 | 4852.349999 | 4734.573236 | 4353.598874 | 5643.534846 | 2279.768397 | 0.091817705  | 0.191053946 | 2.1049825 |
| <b>B7L5W4</b> | TY-2482_chromosome | - | 2894847 | 2896730 | 280.4189305 | 275.9463966 | 284.5751344 | 199.81381   | 162.8020265 | 179.225061  | 0.589934205  | 2.464978685 | 2.0848436 |
| <b>Q19NI3</b> | TY-2482_chromosome | - | 2898827 | 2900389 | 72.55056171 | 78.88015663 | 63.76298053 | 62.11617556 | 59.21820048 | 36.14701682 | 0.335931174  | 1.100625916 | 0.8893679 |
| <b>B7L5W7</b> | TY-2482_chromosome | - | 2900424 | 2901869 | 73.72509468 | 85.43953007 | 104.1050887 | 102.8943558 | 81.99035609 | 27.46192929 | 0.186628614  | 0.501291679 | 0.3852689 |
| <b>B7L5X1</b> | TY-2482_chromosome | - | 2901872 | 2903992 | 176.950311  | 237.6270965 | 200.6336918 | 114.985923  | 91.13801751 | 15.79043088 | 1.219572122  | 4.48454611  | 3.9051049 |
| <b>B7L5X0</b> | TY-2482_chromosome | - | 2903982 | 2904821 | 304.9851315 | 371.6242212 | 292.8611083 | 40.53637749 | 52.89933592 | 37.14079542 | 2.811583503  | 35.49727667 | 33.85912  |
| <b>B7L5X3</b> | TY-2482_chromosome | - | 2904967 | 2906166 | 518.9368778 | 530.7198092 | 538.7741897 | 216.7036044 | 167.2855173 | 263.8798812 | 1.324445099  | 8.549343288 | 7.6941371 |
| <b>B7L5X2</b> | TY-2482_chromosome | + | 2906398 | 2907894 | 1747.817284 | 1738.026922 | 1448.183607 | 3366.801876 | 3825.895323 | 3652.144925 | -1.155836681 | 2.84815199  | 2.4260987 |
| <b>B7L5X4</b> | TY-2482_chromosome | - | 2907971 | 2908303 | 901.022343  | 963.2446626 | 974.5663124 | 187.2997943 | 305.1135634 | 195.106007  | 2.051473595  | 17.96117474 | 16.72834  |
| <b>B7L5X5</b> | TY-2482_chromosome | + | 2908694 | 2909125 | 5104.895447 | 4364.649101 | 4768.861889 | 2755.133063 | 3373.5774   | 3695.22883  | 0.617190809  | 0.832311215 | 0.6623615 |
| <b>B7L5X7</b> | TY-2482_chromosome | + | 2909446 | 2910912 | 1408.774303 | 1529.909447 | 1566.176101 | 6847.322695 | 5232.672053 | 6462.200387 | -2.058590163 | 7.099626899 | 6.3390064 |
| <b>B7L5X8</b> | TY-2482_chromosome | - | 2910967 | 2911716 | 391.1983976 | 386.0755027 | 344.3941829 | 669.8848974 | 579.6060482 | 724.6540218 | -0.823880897 | 4.182195688 | 3.6266538 |
| <b>B7L5X6</b> | TY-2482_chromosome | - | 2911727 | 2913766 | 3364.730573 | 2803.734109 | 3001.345609 | 4511.05327  | 3598.190157 | 5279.071945 | -0.48831065  | 0.856028468 | 0.6815519 |
| <b>B7L5Y0</b> | TY-2482_chromosome | + | 2913969 | 2914808 | 855.0690764 | 650.9502952 | 740.7208512 | 1001.906832 | 926.3137052 | 1333.423727 | -0.437604449 | 2.028724322 | 1.6963287 |
| <b>B7L5Y1</b> | TY-2482_chromosome | + | 2914883 | 2916232 | 2057.346038 | 1914.544296 | 2029.576152 | 3800.590074 | 3050.365033 | 4021.55476  | -0.831138334 | 1.780541416 | 1.4802882 |
| <b>B7L5Y4</b> | TY-2482_chromosome | + | 2917112 | 2917462 | 46.33262234 | 44.37872495 | 48.93633403 | 19.96672225 | 15.43149105 | 14.66198489 | 1.457094519  | 6.902157596 | 6.1529025 |
| <b>B7L5Y2</b> | TY-2482_chromosome | + | 2917519 | 2918805 | 213.1954137 | 210.9898645 | 191.2577399 | 98.4108138  | 90.0151416  | 115.4647168 | 1.02430934   | 6.377013212 | 5.659179  |
| <b>B7L5Y6</b> | TY-2482_chromosome | + | 2918821 | 2919243 | 269.9769352 | 267.9454912 | 261.3722612 | 92.06959989 | 122.8988136 | 129.951432  | 1.260270649  | 8.064264618 | 7.2387034 |
| <b>B7L5Y7</b> | TY-2482_chromosome | - | 2919383 | 2919676 | 172.0744326 | 196.1006859 | 128.144287  | 38.61561992 | 48.33366646 | 34.50585323 | 1.922775181  | 17.68574577 | 16.460969 |
| <b>Q0S2F7</b> | TY-2482_chromosome | + | 2922680 | 2923408 | 325.0622682 | 365.8721495 | 404.3464904 | 961.0068245 | 907.3307673 | 794.9354073 | -1.303770828 | 9.069067147 | 8.1871483 |
| <b>B7L5Z1</b> | TY-2482_chromosome | + | 2923567 | 2924094 | 29.83027409 | 35.18790624 | 29.58255113 | 45.92707702 | 20.44334478 | 20.44334478 | -0.285563046 | 0.236324322 | 0.1752399 |
| <b>B5YVF1</b> | TY-2482_chromosome | - | 2924142 | 2924798 | 16.99347098 | 28.32826574 | 17.59131111 | 102.206534  | 101.1143004 | 57.31949466 | -2.251056563 | 11.3630566  | 10.370229 |
| <b>C8TJU6</b> | TY-2482_chromosome | - | 2924853 | 2925188 | 120.9149412 | 146.0841202 | 142.0405701 | 1604.36971  | 1595.483752 | 743.1024142 | -3.392435715 | 31.71080428 | 30.184998 |
| <b>B7L5Z4</b> | TY-2482_chromosome | - | 2925295 | 2925624 | 281.0772504 | 269.0697939 | 329.7811934 | 2985.226496 | 3293.681108 | 1553.464546 | -3.192618292 | 31.32076806 | 29.801302 |
| <b>B7L5Z3</b> | TY-2482_chromosome | + | 2925879 | 2926448 | 82.88544019 | 99.1738291  | 83.02506324 | 525.7617098 | 701.8159139 | 497.6798295 | -2.757924426 | 29.77342064 | 28.275443 |
| <b>B7L5Z6</b> | TY-2482_chromosome | + | 2927250 | 2927774 | 74.536648   | 87.43806611 | 93.98616671 | 200.3544866 | 223.2588537 | 50.06799674 | -1.023862479 | 2.083434057 | 1.7450651 |
| <b>D7Z0Y0</b> | TY-2482_chromosome | - | 2927730 | 2928056 | 29.71998659 | 41.90376514 | 31.53320018 | 68.22908155 | 94.88069987 | 44.16737687 | -1.13509382  | 3.414428398 | 2.9288516 |
| <b>B7L5Z7</b> | TY-2482_chromosome | + | 2928116 | 2929270 | 59.92224662 | 67.64444038 | 43.0321961  | 124.8611812 | 165.4881852 | 233.8374008 | -1.926315243 | 15.29840096 | 14.150939 |
| <b>B7L5Z5</b> | TY-2482_chromosome | + | 2929298 | 2932408 | 217.6608711 | 186.9886822 | 227.9716539 | 643.4917596 | 585.9819687 | 749.5529336 | -1.569691557 | 13.61032106 | 12.520349 |
| <b>B7L5Z9</b> | TY-2482_chromosome | - | 2932777 | 2933502 | 277.349773  | 278.734041  | 307.8356678 | 115.1641649 | 164.8681423 | 126.4842407 | 1.122083901  | 6.522079438 | 5.797737  |
| <b>gadY</b>   | TY-2482_chromosome | + | 2933748 | 2933852 | 138.1348939 | 178.4490391 | 145.7511237 | 52.62444316 | 62.0198321  | 34.80406582 | 1.512220127  | 12.26362184 | 11.225452 |
| <b>B7L600</b> | TY-2482_chromosome | - | 2934694 | 2934694 | 1523.129029 | 1837.947837 | 1673.659817 | 377.5038905 | 533.5773416 | 254.782372  | 2.026463565  | 16.98945474 | 15.783427 |
| <b>B7L5Z8</b> | TY-2482_chromosome | - | 2935067 | 2936464 | 167.7147325 | 140.0944418 | 145.1151073 | 843.2479433 | 527.6535019 | 685.4624357 | -2.196892368 | 19.84731767 | 18.564549 |
| <b>B7L601</b> | TY-2482_chromosome | - | 2936678 | 2938072 | 190.3664023 | 277.9108892 | 211.7387352 | 46.15161466 | 51.07721847 | 28.23719395 | 2.280019303  | 23.43306361 | 22.059275 |
| <b>B7L603</b> | TY-2482_chromosome | + | 2938477 | 2940123 | 437.424295  | 475.7762574 | 425.694059  | 303.9323451 | 292.9767592 | 349.6922061 | 0.490658491  | 1.848814884 | 1.5412656 |
| <b>B7L604</b> | TY-2482_chromosome | - | 2940180 | 2940779 | 81.61433653 | 79.57679649 | 69.06024774 | 96.78647737 | 88.27394497 | 76.60606172 | -0.239826022 | 0.435863966 | 0.3325795 |
| <b>B7L605</b> | TY-2482_chromosome | + | 2941227 | 2942195 | 92.77393848 | 87.93682452 | 88.40548715 | 39.87625474 | 44.6062974  | 44.68206887 | 1.080271992  | 5.785936099 | 5.1065938 |
| <b>B7L606</b> | TY-2482_chromosome | + | 2942247 | 2943257 | 923.6173449 | 894.0278419 | 881.9875463 | 383.169025  | 414.0318636 | 504.7785752 | 1.097626474  | 6.644063367 | 5.909897  |
| <b>B7L607</b> | TY-2482_chromosome | + | 2943671 | 2944990 | 118.8752703 | 118.6998938 | 120.8244139 | 93.79066008 | 94.61940284 | 103.8049281 | 0.312684667  | 0.864911757 | 0.6894053 |
| <b>Q8Z283</b> | TY-2482_chromosome | - | 2945230 | 2946387 | 220.4423107 | 256.7149786 | 237.6535816 | 311.1846331 | 286.5831026 | 361.4722751 | -0.433108212 | 1.849682239 | 1.1996641 |
| <b>B7L602</b> | TY-2482_chromosome | - | 2946354 | 2947343 | 329.2284906 | 274.2758915 | 297.7086268 | 299.9088641 | 292.0526599 | 371.9228392 | -0.028032278 | 0.18416383  | 0.1359614 |
| <b>B7L609</b> | TY-2482_chromosome | - | 2947401 | 2948165 | 157.0181644 | 166.8552287 | 149.7118414 | 217.8343777 | 249.4020005 | 228.977212  | -0.573835882 | 2.245370578 | 1.889437  |
| <b>B5YVH2</b> | TY-2482_chromosome | - | 2948168 | 2948392 | 33.09616996 | 30.59258219 | 23.39367758 | 33.42559128 | 29.96243667 | 39.22256569 | -0.24700433  | 0.399616706 | 0.3031585 |
| <b>B7L608</b> | TY-2482_chromosome | + | 2948397 | 2949323 | 410.5348183 | 437.2198342 | 389.3544162 | 362.0249288 | 295.6660077 | 359.0326712 | 0.249755491  | 0.771131512 | 0.6109197 |
| <b>B7L611</b> | TY-2482_chromosome | - | 2949425 | 2950918 | 554.7168396 | 633.0401407 | 612.0694592 | 2277.345786 | 2256.874375 | 2665.153911 | -1.996100954 | 20.3626981  | 19.066964 |
| <b>B7L612</b> | TY-2482_chromosome | - | 2951142 | 2952425 | 1528.591927 | 1542.729995 | 1452.381056 | 588.6331804 | 611.4610492 | 872.858018  | 1.178545821  | 6.530874252 | 5.8045094 |
| <b>Q8Z288</b> | TY-2482_chromosome | - | 2952545 | 2954536 | 515.8948825 | 535.9891018 | 566.5990659 | 479.9622237 | 464.9862888 | 533.941717  | 0.153274228  | 0.288476641 | 0.2156058 |
| <b>B7L615</b> | TY-2482_chromosome | - | 2954681 | 2958151 | 2846.231513 | 2895.255279 | 2885.86856  | 2711.42539  | 2492.522555 | 3417.459886 | 0.036350102  | 0.000762636 | 0         |
| <b>B7L614</b> | TY-2482_chromosome | - | 2958136 | 2959239 | 885.3889406 | 957.4455468 | 853.5107379 | 1083.543104 | 975.4860838 | 1220.594817 | -0.295697727 | 0.827684594 | 0.6585784 |
| <b>B7L617</b> | TY-2482_chromosome | - | 2959249 | 2961585 | 2087.263276 | 1940.295588 | 2051.357474 | 3996.142573 | 3473.558209 | 4539.837257 | -0.943775095 | 2.192866853 | 1.8436495 |
| <b>B7L616</b> | TY-2482_chromosome | - | 2961599 | 2964214 | 1456.665181 | 1596.546419 | 1538.334302 | 1697.328846 | 1912.205771 | 2019.284164 | -0.283220732 | 0.827433384 | 0.6584677 |
| <b>B7L619</b> | TY-2482_chromosome | - | 2964214 | 2964963 | 832.0379424 | 1001.570107 | 1053.32737  | 782.1643252 | 708.8592287 | 829.9808873 | 0.313497477  | 0.972874888 | 0.7796551 |
| <b>B7L620</b> | TY-2482_chromosome | - | 2964978 | 2965163 | 537.2337169 | 718.1031642 | 795.3823124 | 203.9824158 | 214.7389909 | 249.6784168 | 1.640458621  | 12.70613405 | 11.651014 |
| <b>B7L621</b> | TY-2482_chromosome | + | 2965436 | 2967005 | 2748.931033 | 3061.93971  | 2850.828885 | 1438.844257 | 1506.16074  | 1390.733463 | 0.966984242  | 2.810997513 | 2.3927    |

|               |                    |   |         |         |             |             |             |             |             |             |              |             |           |
|---------------|--------------------|---|---------|---------|-------------|-------------|-------------|-------------|-------------|-------------|--------------|-------------|-----------|
| <b>B7L618</b> | TY-2482_chromosome | + | 2967005 | 2967193 | 84.26630671 | 109.2912158 | 95.0298476  | 56.39699236 | 60.08090467 | 56.63688418 | 0.682496655  | 3.102059585 | 2.6498095 |
| <b>B7L623</b> | TY-2482_chromosome | + | 2967193 | 2968869 | 321.5381597 | 359.2977213 | 290.8562956 | 283.6320637 | 296.6912572 | 284.2348374 | 0.115480381  | 0.37993357  | 0.2883199 |
| <b>D8E601</b> | TY-2482_chromosome | + | 2969031 | 2969423 | 374.2126628 | 290.0241349 | 313.4717791 | 100.2845506 | 267.255261  | 77.37362312 | 1.167312181  | 3.644731591 | 3.1342969 |
| <b>D8E601</b> | TY-2482_chromosome | + | 2969514 | 2969906 | 608.9047974 | 544.0294561 | 529.9817201 | 160.6751438 | 407.3561248 | 144.346131  | 1.250045894  | 4.698604192 | 4.4098822 |
| <b>D8E601</b> | TY-2482_chromosome | + | 2969997 | 2970389 | 664.4844715 | 528.8399747 | 477.5801431 | 124.4497226 | 381.1305728 | 89.3708753  | 1.487832816  | 4.853287332 | 4.0288269 |
| <b>D8E601</b> | TY-2482_chromosome | + | 2970485 | 2970811 | 313.5067613 | 286.153047  | 265.8284402 | 112.8944577 | 266.2880275 | 82.61344515 | 0.885473674  | 2.691651544 | 2.2885424 |
| <b>B7L627</b> | TY-2482_chromosome | + | 2970990 | 2972258 | 170.2684229 | 222.1995999 | 183.4060511 | 276.372775  | 237.3970816 | 340.2480688 | -0.604238806 | 2.105995654 | 1.7649221 |
| <b>B7L622</b> | TY-2482_chromosome | - | 2972294 | 2973295 | 225.2698986 | 194.0405842 | 198.6014415 | 136.8111381 | 159.2382664 | 191.6467257 | 0.414709991  | 1.013830149 | 0.8143292 |
| <b>B7L629</b> | TY-2482_chromosome | - | 2973295 | 2974275 | 118.0675651 | 137.7705088 | 113.338259  | 94.71716932 | 97.25735481 | 159.6129755 | 0.099722413  | 1.018817421 | 0.0872472 |
| <b>B7L630</b> | TY-2482_chromosome | - | 2974289 | 2975188 | 94.36085841 | 83.0715971  | 83.72238967 | 72.36963272 | 61.82006104 | 69.69988427 | 0.364433277  | 1.032653872 | 0.8300151 |
| <b>B7L631</b> | TY-2482_chromosome | - | 2975201 | 2976217 | 43.38590616 | 43.692502   | 40.82078062 | 51.37586169 | 42.70656175 | 48.66126646 | -0.179795919 | 0.276870537 | 0.2071394 |
| <b>B7L632</b> | TY-2482_chromosome | - | 2976371 | 2977975 | 504.4010783 | 362.7195338 | 419.8151861 | 576.9637326 | 423.9517394 | 530.115885  | -0.207074005 | 0.612398804 | 0.4778386 |
| <b>Q1R551</b> | TY-2482_chromosome | - | 2978330 | 2978836 | 122.6227465 | 142.4845571 | 105.2448046 | 52.79423969 | 58.38110354 | 28.36178439 | 1.263951167  | 7.976308709 | 7.1589479 |
| <b>B7L764</b> | TY-2482_chromosome | - | 2978890 | 2980578 | 394.0536485 | 424.3785011 | 385.4389479 | 962.0426163 | 1017.46602  | 938.1550738 | -1.307202933 | 9.594844342 | 8.689847  |
| <b>B7L6V7</b> | TY-2482_chromosome | - | 2981364 | 2982416 | 36.87468122 | 29.07857512 | 28.15595623 | 30.0243331  | 23.65395325 | 16.25886918 | 0.372172392  | 0.786780262 | 0.6245026 |
| <b>C8TJB8</b> | TY-2482_chromosome | - | 2982409 | 2984901 | 172.8100681 | 153.0456628 | 171.7233089 | 96.40598248 | 100.0955385 | 105.1671289 | 0.767952061  | 3.743918886 | 3.2228759 |
| <b>B7L6V9</b> | TY-2482_chromosome | - | 2986603 | 2987847 | 26.32835778 | 25.29654826 | 18.79529676 | 36.20427343 | 17.13414947 | 23.83665619 | -0.235901804 | 0.182352643 | 0.1347303 |
| <b>B7L6W3</b> | TY-2482_chromosome | - | 2988034 | 2988729 | 278.3725154 | 228.0834991 | 255.4939966 | 101.991821  | 91.8944787  | 87.02017608 | 1.456294487  | 11.65143676 | 10.644337 |
| <b>A1AH92</b> | TY-2482_chromosome | + | 2988722 | 2989447 | 253.3079508 | 268.4927424 | 314.6091329 | 301.6362201 | 253.8299931 | 282.8525893 | 0.009306318  | 0           | 0         |
| <b>B7L6W6</b> | TY-2482_chromosome | + | 2989447 | 2989884 | 184.8530272 | 146.1171615 | 181.6984219 | 176.5881715 | 183.8408577 | 177.6583426 | -0.006525389 | 0.119679924 | 0.087634  |
| <b>B7L6W4</b> | TY-2482_chromosome | - | 2989859 | 2992135 | 836.1826603 | 737.7293749 | 802.8549431 | 1096.753354 | 964.5668807 | 1174.62561  | -0.405864804 | 1.660477221 | 1.3772637 |
| <b>B7L6W8</b> | TY-2482_chromosome | + | 2992342 | 2992998 | 738.1214656 | 703.7972384 | 746.1033509 | 407.2993453 | 368.5290191 | 382.89356   | 0.922439057  | 5.230058938 | 4.588581  |
| <b>B7L6W9</b> | TY-2482_chromosome | + | 2993105 | 2994076 | 1073.36949  | 841.553203  | 985.0957773 | 2232.574021 | 2111.205734 | 2020.024986 | -1.239328987 | 9.060292467 | 8.1805433 |
| <b>B7L6X0</b> | TY-2482_chromosome | - | 2994132 | 2994839 | 2322.608275 | 2542.265372 | 2654.291617 | 2777.81449  | 3035.96667  | 3831.277389 | -0.198698191 | 0.247214335 | 0.1835021 |
| <b>B7L6W7</b> | TY-2482_chromosome | + | 2995273 | 2995560 | 370.8980716 | 391.0100921 | 356.3762921 | 379.887739  | 668.4216397 | 239.2077758 | -0.268874639 | 0.342588288 | 0.2580838 |
| <b>A1AH99</b> | TY-2482_chromosome | - | 2995784 | 2996203 | 48535.48767 | 50997.89929 | 45241.06158 | 40510.79641 | 68400.64527 | 45941.59396 | -0.103108102 | 0.085084655 | 0.0623272 |
| <b>E8YB84</b> | TY-2482_chromosome | - | 2996163 | 2996456 | 149.8478301 | 131.4023522 | 109.8283289 | 93.52830225 | 196.254273  | 34.21383671 | 0.187761334  | 0.363250239 | 0.2745976 |
| <b>B7L6X3</b> | TY-2482_chromosome | - | 2996725 | 2998791 | 7591.507358 | 6566.586147 | 6613.412278 | 6610.01651  | 11542.99763 | 14037.42584 | -0.892561171 | 1.682211805 | 1.3957782 |
| <b>B7L6X1</b> | TY-2482_chromosome | - | 2998804 | 2999712 | 2518.121846 | 2203.239573 | 2296.214047 | 4948.504645 | 4167.93031  | 5230.649551 | -1.001580536 | 2.316416835 | 1.9543939 |
| <b>B7L6X6</b> | TY-2482_chromosome | + | 3000281 | 3001273 | 136.0158741 | 120.3004431 | 164.8314884 | 96.32444912 | 110.1500357 | 105.2445371 | 0.516303687  | 1.499044133 | 1.2346752 |
| <b>B7L6X7</b> | TY-2482_chromosome | - | 3002314 | 3003765 | 115.6618957 | 133.8793037 | 145.507461  | 100.3724653 | 76.26861367 | 134.7985704 | 0.39016476   | 0.903474979 | 0.72154   |
| <b>B7L6Y0</b> | TY-2482_chromosome | - | 3003840 | 3005207 | 144.9446051 | 171.3466113 | 147.0853291 | 133.106356  | 112.837098  | 92.53461351 | 0.351025873  | 1.50718988  | 1.2412439 |
| <b>B7L6Y1</b> | TY-2482_chromosome | + | 3005573 | 3006562 | 27.75994089 | 21.79171252 | 26.43665815 | 42.7476223  | 25.37913133 | 25.34555138 | -0.322473265 | 0.450506055 | 0.3438569 |
| <b>B7L6Y2</b> | TY-2482_chromosome | + | 3006643 | 3008181 | 38.15063218 | 34.30772765 | 39.01762873 | 72.1520383  | 48.12595179 | 52.83116274 | -0.652932628 | 1.880432717 | 1.5678311 |
| <b>B7L6X9</b> | TY-2482_chromosome | + | 3008162 | 3009340 | 65.12118193 | 64.22584855 | 57.9091469  | 72.86285749 | 54.5651554  | 43.90819276 | 0.040190573  | 0.197816339 | 0.1460617 |
| <b>B7L6Y4</b> | TY-2482_chromosome | + | 3009255 | 3009428 | 19.93899903 | 23.5658842  | 29.40070781 | 29.60683246 | 34.68627869 | 20.20788784 | -0.230410495 | 0.305404338 | 0.2286901 |
| <b>B7L6Y5</b> | TY-2482_chromosome | + | 3009421 | 3010596 | 187.7030425 | 183.2131753 | 187.4976672 | 175.1288027 | 207.5599242 | 181.6667602 | -0.001167079 | 0.018708642 | 0.012479  |
| <b>B7L6Y3</b> | TY-2482_chromosome | - | 3010798 | 3011619 | 926.56753   | 932.3925202 | 900.4711061 | 993.2716893 | 1459.050898 | 904.355423  | -0.297363505 | 0.703966032 | 0.5528807 |
| <b>B7L6Y6</b> | TY-2482_chromosome | + | 3011939 | 3013965 | 1111.310587 | 1120.234295 | 1038.384096 | 1730.421989 | 1131.939846 | 1436.6712   | -0.446619193 | 1.173656218 | 0.9538012 |
| <b>B7L6Y7</b> | TY-2482_chromosome | + | 3014146 | 3015396 | 697.767592  | 642.2502452 | 700.5668941 | 743.055951  | 800.8032732 | 973.1383404 | -0.233307197 | 0.880190578 | 0.7028605 |
| <b>B7L6Y9</b> | TY-2482_chromosome | - | 3015554 | 3016024 | 423.9769118 | 467.7511377 | 397.8859518 | 177.335177  | 182.0347084 | 163.3179735 | 1.247921465  | 9.447729166 | 8.5503114 |
| <b>B7L6Z0</b> | TY-2482_chromosome | - | 3016129 | 3016974 | 338.7387954 | 350.0840621 | 333.3303396 | 661.0282477 | 737.1438065 | 786.5454846 | -1.08052032  | 7.119047187 | 6.357878  |
| <b>B7L6Z2</b> | TY-2482_chromosome | + | 3021526 | 3023109 | 91.60147407 | 81.75122758 | 55.46631285 | 47.1027779  | 36.37247739 | 29.36621606 | 0.906013417  | 4.056526158 | 3.5121249 |
| <b>B7L6Z9</b> | TY-2482_chromosome | + | 3024528 | 3025220 | 39.64893204 | 36.66725174 | 39.63187004 | 33.68070897 | 23.54577513 | 34.02659503 | 0.363108701  | 0.695929095 | 0.5467262 |
| <b>B7L701</b> | TY-2482_chromosome | + | 3026482 | 3027453 | 215.3176327 | 221.5406206 | 221.8401286 | 208.5349493 | 191.1327213 | 150.4432736 | 0.209137272  | 0.659151122 | 0.5156793 |
| <b>B7L6Z8</b> | TY-2482_chromosome | - | 3027456 | 3028589 | 59.77592028 | 70.63354753 | 53.84671421 | 71.2219667  | 67.38109045 | 49.14662776 | -0.143035962 | 0.061415276 | 0.0433654 |
| <b>B7L705</b> | TY-2482_chromosome | - | 3029466 | 3031001 | 221.4118001 | 218.7947587 | 201.8498122 | 660.9025072 | 470.3247123 | 689.0376848 | -1.513075217 | 10.9687628  | 9.969461  |
| <b>B7L706</b> | TY-2482_chromosome | - | 3031169 | 3032317 | 34.39267878 | 39.93240184 | 29.41232281 | 51.71662636 | 31.71454718 | 42.12030728 | -0.375965392 | 0.536141729 | 0.4142374 |
| <b>B7L704</b> | TY-2482_chromosome | - | 3032510 | 3034351 | 1536.870128 | 1409.752617 | 1496.754587 | 835.847944  | 776.1800796 | 1017.865567 | 0.809238221  | 3.567214544 | 3.0662314 |
| <b>B7L708</b> | TY-2482_chromosome | - | 3034351 | 3035739 | 1726.75574  | 1598.042815 | 1815.133097 | 765.9368859 | 591.3997368 | 779.9273852 | 1.29857786   | 8.757937412 | 7.8923822 |
| <b>B7L709</b> | TY-2482_chromosome | - | 3035840 | 3036445 | 383.3931576 | 512.7274016 | 397.8800584 | 557.3253896 | 579.6693207 | 664.1223647 | -0.535530409 | 1.65256608  | 1.3703445 |
| <b>B7L711</b> | TY-2482_chromosome | + | 3036674 | 3040636 | 303.0444036 | 258.5862287 | 271.2610939 | 307.3821811 | 263.8181669 | 331.2935827 | -0.079195052 | 0.232605302 | 0.1725968 |
| <b>C8TME0</b> | TY-2482_chromosome | + | 3041369 | 3042208 | 107.3971719 | 142.7374779 | 127.4429033 | 41.41341447 | 54.80669792 | 23.10813563 | 1.549091535  | 10.30534186 | 9.362834  |
| <b>B7L717</b> | TY-2482_chromosome | + | 3042253 | 3043194 | 171.2163035 | 165.4915808 | 181.0069664 | 60.17971774 | 60.17971774 | 39.8808522  | 1.789542229  | 16.2862439  | 15.101115 |
| <b>B7L715</b> | TY-2482_chromosome | - | 3045272 | 3046405 | 54.32517654 | 75.47350089 | 62.66312751 | 67.83377309 | 39.92531563 | 39.87067309 | 0.231335088  | 0.791427722 | 0.6285966 |
| <b>B7L722</b> | TY-2482_chromosome | + | 3047307 | 3049217 | 772.6380778 | 665.7736357 | 736.8392676 | 889.3673907 | 732.490634  | 886.5865116 | -0.173357701 | 0.528653085 | 0.4078812 |
| <b>B7L723</b> | TY-2482_chromosome | + | 3049450 | 3050595 | 660.2795147 | 677.488149  | 682.0322852 | 746.7872832 | 605.0595523 | 802.2300358 | -0.084834304 | 0.186307569 | 0.1374092 |

|               |                    |   |         |         |             |             |             |              |             |             |              |             |           |
|---------------|--------------------|---|---------|---------|-------------|-------------|-------------|--------------|-------------|-------------|--------------|-------------|-----------|
| <b>B7L720</b> | TY-2482_chromosome | + | 3050598 | 3051182 | 471.0790025 | 431.5863313 | 535.0992981 | 348.7930527  | 351.3042123 | 310.7128631 | 0.540597726  | 1.877537746 | 1.5657173 |
| <b>B7L724</b> | TY-2482_chromosome | - | 3051200 | 3051406 | 350.5666842 | 406.1197255 | 376.9617623 | 122.9978409  | 183.0878396 | 137.0243548 | 1.342236064  | 9.535843834 | 8.6346528 |
| <b>A7ZTF2</b> | TY-2482_chromosome | - | 3051610 | 3051984 | 1110.434915 | 1202.490669 | 1155.381348 | 404.1066912  | 687.4488378 | 324.444804  | 1.256572909  | 7.328417801 | 6.5549985 |
| <b>B7L728</b> | TY-2482_chromosome | + | 3053324 | 3058171 | 517.5577855 | 504.8715554 | 478.5179405 | 327.4313767  | 405.0646659 | 343.5118093 | 0.48234657   | 1.696029136 | 1.4083054 |
| <b>B7L729</b> | TY-2482_chromosome | + | 3058543 | 3060195 | 73.40286441 | 65.01434663 | 65.91368367 | 342.0531009  | 297.4683333 | 413.9621977 | -2.319750135 | 24.25916052 | 22.866987 |
| <b>B7L730</b> | TY-2482_chromosome | + | 3060198 | 3060971 | 83.8886301  | 72.88172187 | 75.16487456 | 258.543223   | 187.3536195 | 218.4544373 | -1.52800363  | 11.91788621 | 10.898027 |
| <b>B7L725</b> | TY-2482_chromosome | + | 3060971 | 3062158 | 135.2361546 | 144.2506692 | 148.6374211 | 493.5093163  | 362.9710926 | 472.1555736 | -1.645388219 | 13.09172305 | 12.014441 |
| <b>B7L732</b> | TY-2482_chromosome | + | 3062347 | 3062817 | 360.5332856 | 330.3764785 | 343.2803806 | 418.2566304  | 359.3487368 | 499.4884877 | -0.259645714 | 0.82840013  | 0.6591535 |
| <b>B7L731</b> | TY-2482_chromosome | - | 3062876 | 3063694 | 1462.02827  | 1414.548258 | 1461.102073 | 2871.972141  | 2403.34357  | 2959.942635 | -0.912010436 | 3.098760978 | 2.6467804 |
| <b>B7L734</b> | TY-2482_chromosome | - | 3063777 | 3064793 | 4745.030073 | 4606.010348 | 4799.931125 | 10849.24908  | 8968.452809 | 11019.41569 | -1.112110656 | 2.418517512 | 2.0445041 |
| <b>B7L735</b> | TY-2482_chromosome | - | 3064796 | 3065260 | 4084.615845 | 4167.90109  | 4343.759442 | 8079.664153  | 7873.737484 | 8322.527146 | -0.93631217  | 1.878875034 | 1.5666922 |
| <b>B7L736</b> | TY-2482_chromosome | - | 3065326 | 3065574 | 1787.238533 | 1806.111047 | 1961.044829 | 3339.522513  | 3115.071005 | 3239.063559 | -0.79419097  | 1.653275352 | 1.3708715 |
| <b>B7L733</b> | TY-2482_chromosome | - | 3065719 | 3066147 | 1450.04444  | 1455.381792 | 1433.315353 | 20649.615354 | 2175.975108 | 1917.049629 | -0.514242496 | 1.890288738 | 1.5763168 |
| <b>B6I3J1</b> | TY-2482_chromosome | + | 3066171 | 3066365 | 95.64859111 | 109.623529  | 91.56776234 | 82.51266922  | 64.55828111 | 62.09876114 | 0.412654987  | 1.683139679 | 1.396522  |
| <b>B7L738</b> | TY-2482_chromosome | + | 3066392 | 3067933 | 12611.72461 | 10580.21778 | 11678.88004 | 4959.817988  | 3849.389708 | 4921.532175 | 1.37813979   | 3.192835893 | 2.7307708 |
| <b>B7L739</b> | TY-2482_chromosome | + | 3067970 | 3069226 | 1010.425023 | 971.0548476 | 897.704671  | 1014.665863  | 927.2818032 | 1048.429964 | -0.06049294  | 0.10864638  | 0.0798367 |
| <b>B7L737</b> | TY-2482_chromosome | + | 3069233 | 3070189 | 280.6292937 | 240.4010621 | 243.4723435 | 267.5756676  | 278.4049614 | 369.1475216 | -0.187697303 | 0.659918931 | 0.5160497 |
| <b>B7L741</b> | TY-2482_chromosome | - | 3070182 | 3071213 | 29.01094502 | 27.07460536 | 38.69048246 | 42.73863488  | 31.72218703 | 49.62375477 | -0.304709398 | 0.737041248 | 0.5814863 |
| <b>Q1R4X5</b> | TY-2482_chromosome | + | 3071443 | 3072465 | 3993.39818  | 3956.959309 | 4256.64305  | 6603.956564  | 5371.8759   | 8169.378985 | -0.672894686 | 1.232561666 | 1.0021603 |
| <b>B7L740</b> | TY-2482_chromosome | - | 3072490 | 3073683 | 4417.305265 | 4780.799789 | 5097.853826 | 6443.15376   | 4597.368618 | 7999.535852 | -0.374033428 | 0.544093357 | 0.4200418 |
| <b>B7L743</b> | TY-2482_chromosome | - | 3073961 | 3074815 | 629.5205195 | 717.8994743 | 674.0739784 | 429.3172274  | 518.1400109 | 150.0097132 | 0.743727746  | 2.605758272 | 2.2109944 |
| <b>B7L745</b> | TY-2482_chromosome | + | 3075119 | 3076048 | 3088.482524 | 3214.655529 | 3275.473529 | 3497.634532  | 3164.155069 | 4041.223205 | -0.138107588 | 0.183129596 | 0.1352948 |
| <b>B7L746</b> | TY-2482_chromosome | + | 3076061 | 3077104 | 1989.07965  | 2196.928149 | 2229.711412 | 2835.822517  | 2188.515997 | 3184.669415 | -0.346590325 | 0.504078354 | 0.3876826 |
| <b>B7L744</b> | TY-2482_chromosome | + | 3077111 | 3078100 | 1117.752096 | 1433.012575 | 1242.484499 | 1337.858482  | 1120.171639 | 1379.889871 | -0.072307593 | 0.029163958 | 0.0195425 |
| <b>B7L748</b> | TY-2482_chromosome | + | 3078100 | 3079305 | 1328.08642  | 1474.94081  | 1285.284555 | 1742.739168  | 1965.040186 | 812.8861023 | -0.275958031 | 0.244776818 | 0.1814782 |
| <b>B7L749</b> | TY-2482_chromosome | - | 3079347 | 3080486 | 1182.900117 | 1361.844208 | 1290.75973  | 1286.444919  | 1269.829066 | 187.142083  | 0.280845073  | 0.688417497 | 0.5398849 |
| <b>B7L750</b> | TY-2482_chromosome | - | 3080498 | 3081508 | 636.3100996 | 619.1596814 | 726.5219349 | 866.0688912  | 552.5019187 | 30.51375799 | 0.23425302   | 0.420289871 | 0.3202522 |
| <b>B7L751</b> | TY-2482_chromosome | - | 3081536 | 3082240 | 520.3016623 | 561.7781187 | 618.2171639 | 801.6512304  | 520.658136  | 30.51612638 | 0.092446255  | 0.289647186 | 0.2163259 |
| <b>B7L752</b> | TY-2482_chromosome | - | 3082269 | 3083273 | 664.7353053 | 682.8246228 | 716.4470956 | 947.7932427  | 906.7366167 | 68.73139028 | -0.090402226 | 0.085376763 | 0.0624187 |
| <b>B7L753</b> | TY-2482_chromosome | - | 3083319 | 3084122 | 768.778425  | 797.9885718 | 718.1437142 | 830.4866175  | 898.3970412 | 458.780453  | -0.037653179 | 0.102053904 | 0.0748618 |
| <b>B7L754</b> | TY-2482_chromosome | - | 3084109 | 3085230 | 963.0726631 | 1106.597451 | 996.1938798 | 1098.313868  | 942.762552  | 956.5934217 | -0.028394234 | 0.0562581   | 0.0397725 |
| <b>B7L755</b> | TY-2482_chromosome | - | 3085230 | 3086285 | 728.1854004 | 867.0311821 | 803.4933818 | 1125.222711  | 1040.18976  | 921.2353581 | -0.430502684 | 1.217272209 | 0.9888075 |
| <b>B7L756</b> | TY-2482_chromosome | + | 3086698 | 3087972 | 953.8157676 | 761.0367211 | 762.3210702 | 770.0824791  | 814.4690598 | 923.3008891 | 0.038086945  | 0.029168704 | 0.0195425 |
| <b>B7L747</b> | TY-2482_chromosome | + | 3087983 | 3088459 | 418.0087591 | 412.5084532 | 430.5137061 | 490.2988238  | 579.7576487 | 539.413736  | -0.326179069 | 1.099212481 | 0.8884096 |
| <b>B7L758</b> | TY-2482_chromosome | - | 3088504 | 3089310 | 180.3122393 | 175.0427016 | 159.5618067 | 301.4544059  | 328.6023987 | 259.519936  | -0.822197045 | 3.961053483 | 3.3423677 |
| <b>Q1R4V7</b> | TY-2482_chromosome | + | 3089324 | 3089596 | 6640.933894 | 5974.014201 | 6085.946539 | 5489.119161  | 7833.894522 | 5941.545936 | -0.01170428  | 0.040267057 | 0.0276192 |
| <b>B7L760</b> | TY-2482_chromosome | - | 3089599 | 3089832 | 13666.82469 | 11857.92507 | 13892.80514 | 11436.35851  | 16339.20864 | 13544.32689 | 0.005540939  | 0.062391446 | 0.0440239 |
| <b>B7L757</b> | TY-2482_chromosome | - | 3090052 | 3090717 | 3036.996303 | 3129.049504 | 2769.452335 | 1311.808186  | 1855.804515 | 1221.353206 | 0.993406272  | 2.591354373 | 2.1987107 |
| <b>B7L762</b> | TY-2482_chromosome | + | 3090889 | 3092106 | 1332.712962 | 1270.143422 | 1245.750278 | 1648.910469  | 1627.12886  | 1842.981346 | -0.391944623 | 1.363621532 | 1.1175757 |
| <b>B5YWD8</b> | TY-2482_chromosome | + | 3092087 | 3092542 | 909.554378  | 801.7016089 | 785.4885101 | 1640.96516   | 1823.774666 | 1748.461658 | -1.040189261 | 6.528314137 | 5.8024558 |
| <b>B7L761</b> | TY-2482_chromosome | + | 3092652 | 3093245 | 492.1410393 | 461.5357513 | 466.7162491 | 681.2439466  | 829.995277  | 873.3237055 | -0.697778571 | 3.535384265 | 3.0380052 |
| <b>B7L766</b> | TY-2482_chromosome | - | 3093288 | 3093926 | 793.3953099 | 841.8723746 | 791.5316249 | 717.594547   | 782.6552281 | 793.2401024 | 0.079104684  | 0.172645122 | 0.1275638 |
| <b>B7L767</b> | TY-2482_chromosome | - | 3093995 | 3094732 | 333.5547415 | 299.985062  | 347.4301577 | 1114.555618  | 912.6628204 | 1186.414269 | -1.665177363 | 15.38628884 | 14.230734 |
| <b>E3XS42</b> | TY-2482_chromosome | + | 3094640 | 3094819 | 64.44272326 | 54.95095549 | 58.0199839  | 209.0917741  | 157.3112014 | 203.7638554 | -1.665101115 | 14.20502106 | 13.092218 |
| <b>B7L765</b> | TY-2482_chromosome | + | 3094835 | 3095695 | 1365.410683 | 1508.979301 | 1468.376679 | 2453.498867  | 2424.360572 | 2482.559141 | -0.77621752  | 2.477425233 | 2.0959179 |
| <b>B7L769</b> | TY-2482_chromosome | + | 3095907 | 3096740 | 406.7399484 | 457.429314  | 395.289959  | 501.8095657  | 443.2692721 | 254.8248175 | -0.065708781 | 0.109697211 | 0.0804742 |
| <b>B7L770</b> | TY-2482_chromosome | + | 3097035 | 3097649 | 332.5901234 | 388.1999272 | 371.0822656 | 676.4029848  | 1195.179947 | 769.992304  | -1.276873782 | 7.409529248 | 6.6315681 |
| <b>B7L771</b> | TY-2482_chromosome | - | 3097652 | 3099331 | 113.0186828 | 117.4634531 | 90.70999017 | 94.40377632  | 97.35218322 | 107.718818  | 0.070306456  | 0.185117657 | 0.136645  |
| <b>B7L768</b> | TY-2482_chromosome | + | 3099589 | 3100209 | 2532.146736 | 2504.06645  | 2611.93328  | 1872.738993  | 2116.810036 | 2070.73532  | 0.361935894  | 0.493738733 | 0.3793289 |
| <b>B7L773</b> | TY-2482_chromosome | + | 3100267 | 3100539 | 1697.684809 | 1505.32466  | 1643.346415 | 1681.706929  | 1766.403176 | 1847.021837 | -0.082807498 | 0.27544059  | 0.2059329 |
| <b>B7L774</b> | TY-2482_chromosome | + | 3100561 | 3102666 | 4126.817924 | 3411.534374 | 3534.74445  | 4556.17129   | 4566.590003 | 5345.066594 | -0.331649934 | 0.529779814 | 0.4088822 |
| <b>B7L775</b> | TY-2482_chromosome | + | 3102676 | 3103362 | 840.055273  | 709.2526176 | 709.5572516 | 815.7678454  | 1020.180047 | 1149.442838 | -0.327091637 | 1.338051146 | 1.0956787 |
| <b>B7L772</b> | TY-2482_chromosome | + | 3103371 | 3105449 | 1925.962776 | 1534.033741 | 1633.941837 | 1723.611439  | 1781.827295 | 2180.894387 | -0.083079976 | 0.345925833 | 0.260843  |
| <b>B7L777</b> | TY-2482_chromosome | - | 3105621 | 3106823 | 1015.623276 | 938.2979674 | 985.719057  | 420.116419   | 380.2870957 | 534.9293001 | 1.195496573  | 7.264436469 | 6.4943925 |
| <b>B7L778</b> | TY-2482_chromosome | + | 3107103 | 3108491 | 202.4503933 | 263.1995607 | 208.4171865 | 479.3786479  | 500.5538977 | 459.2886403 | -1.177312861 | 6.84957475  | 6.1024512 |
| <b>B7L776</b> | TY-2482_chromosome | + | 3108615 | 3110321 | 1353.642977 | 1237.252483 | 1333.70275  | 892.6625267  | 742.5099572 | 873.4736879 | 0.663977313  | 2.757371183 | 2.3459122 |
| <b>B7L780</b> | TY-2482_chromosome | - | 3110380 | 3112695 | 191.1694269 | 238.5769017 | 229.1998911 | 208.5597284  | 150.0280601 | 188.0797944 | 0.21686901   | 0.68158972  | 0.5349285 |



|               |                    |   |         |         |             |             |             |             |             |             |              |             |           |
|---------------|--------------------|---|---------|---------|-------------|-------------|-------------|-------------|-------------|-------------|--------------|-------------|-----------|
| <b>B7L781</b> | TY-2482_chromosome | - | 3112708 | 3114087 | 73.52884165 | 68.93538445 | 51.00170218 | 49.26837017 | 51.90834578 | 43.63246017 | 0.360240604  | 1.049173123 | 0.8446762 |
| <b>D8CB43</b> | TY-2482_chromosome | - | 3114181 | 3114534 | 59.83517523 | 63.71793634 | 53.91882575 | 32.18563781 | 39.25130849 | 22.84316675 | 0.838940793  | 3.348845441 | 2.8684768 |
| <b>selC</b>   | TY-2482_chromosome | + | 3114380 | 3114474 | 46.52849502 | 41.42858164 | 37.38490305 | 16.09270118 | 29.3301256  | 13.59170366 | 1.069570843  | 3.631755317 | 3.1225518 |
| <b>B5YWF9</b> | TY-2482_chromosome | + | 3114696 | 3115955 | 778.5215867 | 785.3741413 | 727.4137703 | 292.8290741 | 328.6008453 | 269.9614936 | 1.335894626  | 10.61289014 | 9.6533822 |
| <b>E1U309</b> | TY-2482_chromosome | - | 3116080 | 3116774 | 201.9327788 | 217.8518201 | 176.6201276 | 94.06844621 | 135.7132556 | 117.08351   | 0.766982075  | 3.74720022  | 3.2258413 |
| <b>Q4MUS7</b> | TY-2482_chromosome | - | 3116967 | 3119960 | 1441.206495 | 1339.697739 | 1280.670018 | 1141.804921 | 1065.561033 | 1487.403748 | 0.180231805  | 0.283920115 | 0.2120609 |
| <b>D3H359</b> | TY-2482_chromosome | - | 3119936 | 3120493 | 1240.06626  | 1103.137464 | 1109.060254 | 490.970837  | 595.2551429 | 515.8376074 | 1.131461656  | 7.846515103 | 7.0390391 |
| <b>D3H361</b> | TY-2482_chromosome | - | 3121175 | 3122185 | 442.6536854 | 475.9746832 | 439.607004  | 147.6602424 | 162.9438775 | 144.8563187 | 1.550479243  | 13.46404735 | 12.377573 |
| <b>C7S9T5</b> | TY-2482_chromosome | + | 3122142 | 3122813 | 1123.829134 | 1266.786482 | 1237.981801 | 520.2498202 | 657.3114962 | 304.8691684 | 1.210706792  | 7.517862496 | 6.7341568 |
| <b>Q3I3P0</b> | TY-2482_chromosome | + | 3123010 | 3123390 | 312.6359134 | 271.910818  | 325.671695  | 319.0585433 | 303.89454   | 362.8586588 | -0.047615961 | 0.2311681   | 0.1714872 |
| <b>D3H364</b> | TY-2482_chromosome | + | 3123387 | 3124163 | 550.3867891 | 589.0684623 | 514.1046013 | 549.6128761 | 542.3634131 | 578.7913655 | -0.041225002 | 0.026284666 | 0.017635  |
| <b>Q7AQT7</b> | TY-2482_chromosome | - | 3124203 | 3124904 | 426.1350118 | 473.4016223 | 451.5817552 | 370.0320574 | 423.173342  | 465.4588901 | 0.117961762  | 0.206004037 | 0.1520712 |
| <b>C8UQP4</b> | TY-2482_chromosome | - | 3124954 | 3125352 | 230.2377668 | 237.2071228 | 249.664777  | 138.9656593 | 157.4561152 | 160.397757  | 0.679231749  | 2.924964176 | 2.492991  |
| <b>C8UQP5</b> | TY-2482_chromosome | - | 3125505 | 3125831 | 899.5297289 | 975.8983914 | 954.7069532 | 549.9496437 | 492.3195822 | 455.4594739 | 0.874228481  | 5.27525699  | 4.6308517 |
| <b>C8UQP5</b> | TY-2482_chromosome | + | 3125826 | 3126080 | 665.442472  | 789.2367648 | 655.3916913 | 328.5212438 | 327.657732  | 268.7389524 | 1.102967847  | 7.921299273 | 7.1064308 |
| <b>C8UQP4</b> | TY-2482_chromosome | + | 3126233 | 3126631 | 231.6932012 | 271.8115248 | 234.8946752 | 145.8309224 | 152.933937  | 127.8838848 | 0.726100116  | 3.919702537 | 3.3861634 |
| <b>Q7AQT7</b> | TY-2482_chromosome | + | 3126681 | 3127382 | 436.1055796 | 447.1297576 | 348.1567675 | 359.611229  | 404.987082  | 416.9198401 | 0.03391517   | 0.106129839 | 0.0784309 |
| <b>E3PYS5</b> | TY-2482_chromosome | + | 3128042 | 3128989 | 409.4749207 | 248.161405  | 363.9457757 | 168.4136204 | 203.8878915 | 205.0938407 | 0.96666655   | 3.709403296 | 3.1919226 |
| <b>C8UQP1</b> | TY-2482_chromosome | + | 3129300 | 3130112 | 11320.68459 | 12594.86992 | 11344.02445 | 14253.34673 | 14954.85246 | 16668.61488 | -0.387614499 | 0.465015029 | 0.355653  |
| <b>A8SPZ5</b> | TY-2482_chromosome | + | 3130176 | 3131105 | 8200.796699 | 8211.712281 | 8014.516176 | 10647.86987 | 11416.57369 | 12880.91496 | -0.490328075 | 0.727209018 | 0.572606  |
| <b>Q7AQT7</b> | TY-2482_chromosome | - | 3131879 | 3132580 | 500.9781258 | 565.4680306 | 476.4547838 | 420.7441199 | 446.8218026 | 483.9729967 | 0.165582769  | 0.458412978 | 0.3499069 |
| <b>D3H369</b> | TY-2482_chromosome | - | 3132630 | 3133931 | 550.5531406 | 485.0613116 | 498.3750652 | 482.3844367 | 578.8488782 | 543.3326681 | -0.025789505 | 0.123056946 | 0.0903596 |
| <b>Q935L3</b> | TY-2482_chromosome | - | 3135290 | 3136981 | 75.90356919 | 46.32337646 | 62.02360973 | 70.16390966 | 42.62322672 | 56.59857463 | 0.174716406  | 0.202562878 | 0.1495986 |
| <b>C8UQM8</b> | TY-2482_chromosome | + | 3138202 | 3138633 | 126.9440017 | 139.2097657 | 150.7340213 | 58.60064873 | 74.62787428 | 87.73022023 | 0.980272436  | 4.782708454 | 4.1756719 |
| <b>P11901</b> | TY-2482_chromosome | - | 3139007 | 3140116 | 236.2826999 | 251.8230773 | 226.2985662 | 170.5189095 | 225.8537826 | 155.6446723 | 0.335728627  | 1.089151651 | 0.8800551 |
| <b>D3H379</b> | TY-2482_chromosome | - | 3140579 | 3140911 | 68.69302181 | 65.48216691 | 81.4982574  | 43.15575026 | 52.85496004 | 43.56587618 | 0.673115408  | 2.210973498 | 1.8599788 |
| <b>E5FD82</b> | TY-2482_chromosome | + | 3140964 | 3141227 | 719.5687332 | 725.3524505 | 560.0569799 | 349.4676252 | 344.010532  | 313.3149395 | 0.928017595  | 5.741750521 | 5.06558   |
| <b>D3H381</b> | TY-2482_chromosome | - | 3141265 | 3141912 | 8916.600869 | 8165.837671 | 8101.610664 | 3046.192709 | 3542.848393 | 3709.835993 | 1.331033244  | 3.083563972 | 2.6342692 |
| <b>D3H382</b> | TY-2482_chromosome | + | 3142018 | 3143214 | 573.0204861 | 490.4022328 | 511.5786813 | 235.6783084 | 262.1538898 | 223.857072  | 1.144670956  | 7.339206348 | 6.5652219 |
| <b>Q6SJ76</b> | TY-2482_chromosome | - | 3143252 | 3144160 | 167.7446571 | 125.5964454 | 152.544248  | 71.24256369 | 87.40370162 | 86.71712912 | 0.95332852   | 4.663539706 | 4.0675274 |
| <b>D3H369</b> | TY-2482_chromosome | - | 3144097 | 3144837 | 328.4575129 | 294.1515679 | 286.3594173 | 190.4846551 | 303.2233389 | 239.5180752 | 0.353890982  | 0.834180873 | 0.663386  |
| <b>Q0TDJ8</b> | TY-2482_chromosome | - | 3147419 | 3147708 | 129.894756  | 144.4665716 | 162.0386492 | 66.42190886 | 63.70049381 | 59.35857381 | 1.197654748  | 8.522720324 | 7.6681954 |
| <b>C8TTS1</b> | TY-2482_chromosome | + | 3148481 | 3149235 | 64.57829147 | 52.21833067 | 49.23529507 | 26.22841411 | 30.09187407 | 22.61629675 | 1.067574285  | 4.514966157 | 3.9326248 |
| <b>E9YZX6</b> | TY-2482_chromosome | + | 3149872 | 3150217 | 153.1440972 | 169.7888507 | 172.4159421 | 74.57006895 | 104.8194385 | 71.39051363 | 0.971706519  | 5.476000494 | 4.8192528 |
| <b>C8TWJ4</b> | TY-2482_chromosome | + | 3151826 | 3152695 | 269.1551818 | 292.9550544 | 264.6183142 | 387.1752206 | 292.2551962 | 59.41231906 | -0.059941984 | 0.188261696 | 0.1388305 |
| <b>C8TV65</b> | TY-2482_chromosome | + | 3152695 | 3153666 | 30.21476017 | 25.57803843 | 18.01152588 | 36.41817194 | 22.71837432 | 11.25778852 | -0.095531214 | 0.043368837 | 0.0298383 |
| <b>C8TNL5</b> | TY-2482_chromosome | + | 3153931 | 3156885 | 661.0746512 | 657.0102752 | 659.54774   | 562.8210115 | 457.6178908 | 648.1711158 | 0.268085415  | 0.616660484 | 0.481455  |
| <b>B3Y1R9</b> | TY-2482_chromosome | + | 3156923 | 3157114 | 60.47211547 | 75.46857272 | 56.49696272 | 23.82010884 | 41.1117224  | 29.08813085 | 0.981584973  | 4.06550282  | 3.5201005 |
| <b>C8TWJ8</b> | TY-2482_chromosome | + | 3157272 | 3158087 | 53.06927241 | 58.44971337 | 49.32275429 | 11.30556785 | 21.01718202 | 19.5663848  | 1.650768283  | 8.023076955 | 7.2013198 |
| <b>Q1RA72</b> | TY-2482_chromosome | - | 3158212 | 3158259 | 40.11972111 | 50.95633423 | 51.67551259 | 7.971068391 | 5.401533939 | 7.840470108 | 2.711737004  | 15.60893361 | 14.446518 |
| <b>Q5K5L6</b> | TY-2482_chromosome | - | 3158426 | 3159382 | 90.80470871 | 79.6183337  | 60.88208675 | 42.59849974 | 41.8295254  | 47.23707656 | 0.79762182   | 3.141346063 | 2.6831243 |
| <b>D3GX48</b> | TY-2482_chromosome | + | 3159733 | 3160215 | 117.9848147 | 150.0743043 | 118.6203964 | 72.76505671 | 83.78435746 | 71.20634085 | 0.688546895  | 3.636482636 | 3.126664  |
| <b>B7MNT7</b> | TY-2482_chromosome | + | 3160151 | 3160639 | 41.08606988 | 49.89167748 | 35.9979008  | 33.93170174 | 43.76942764 | 34.37731869 | 0.106599818  | 0.249322184 | 0.1853625 |
| <b>B7LBT9</b> | TY-2482_chromosome | + | 3160639 | 3161124 | 44.22499033 | 32.72898258 | 44.38365149 | 23.28891844 | 37.47130479 | 23.95139703 | 0.599071858  | 1.248890842 | 1.0167066 |
| <b>B7L784</b> | TY-2482_chromosome | + | 3164362 | 3165282 | 444.9550704 | 425.6363233 | 456.2838621 | 303.855355  | 351.3348644 | 318.4539451 | 0.473022185  | 1.577042778 | 1.3041834 |
| <b>B7L785</b> | TY-2482_chromosome | - | 3165292 | 3166107 | 370.1015619 | 368.8702837 | 402.2184961 | 127.4232975 | 142.0554085 | 105.6392172 | 1.597199615  | 13.91075817 | 12.804081 |
| <b>B7L783</b> | TY-2482_chromosome | + | 3166329 | 3166619 | 35.85417167 | 50.73842015 | 25.817359   | 11.07941233 | 26.50655221 | 25.9678926  | 0.761561955  | 1.85421131  | 1.565949  |
| <b>B7L787</b> | TY-2482_chromosome | - | 3166666 | 3168012 | 171.9861001 | 182.2645439 | 161.5717892 | 163.3154996 | 163.7564621 | 198.3447649 | -0.025420502 | 0.046068454 | 0.0317519 |
| <b>D3H2G2</b> | TY-2482_chromosome | - | 3168061 | 3168537 | 243.9743096 | 214.3841395 | 209.099779  | 70.69983522 | 69.09214514 | 91.68309296 | 1.57589768   | 12.83281103 | 11.768962 |
| <b>B7L789</b> | TY-2482_chromosome | + | 3170072 | 3171835 | 278.2903155 | 248.1510932 | 264.0688884 | 407.3837064 | 330.2515361 | 390.6619676 | -0.498537902 | 1.916923377 | 1.5990123 |
| <b>B7L790</b> | TY-2482_chromosome | - | 3171886 | 3173274 | 74.17759865 | 64.98750559 | 64.55327488 | 56.43574196 | 43.67003057 | 30.82748445 | 0.569963309  | 1.992406287 | 1.6652971 |
| <b>B7L809</b> | TY-2482_chromosome | - | 3173415 | 3174731 | 115.1014662 | 111.5056003 | 126.2655598 | 75.72218227 | 107.4959783 | 92.10853259 | 0.413403596  | 1.092559079 | 0.8825375 |
| <b>B7L808</b> | TY-2482_chromosome | - | 3174744 | 3176243 | 145.1421364 | 136.8645276 | 135.9147303 | 135.9540307 | 122.7923051 | 143.2588421 | 0.068066131  | 0.107301363 | 0.0791635 |
| <b>B7L811</b> | TY-2482_chromosome | - | 3176246 | 3176833 | 92.12519867 | 75.93246587 | 85.15312542 | 94.95943339 | 79.14731699 | 70.06290739 | 0.046358339  | 0.083149649 | 0.0609934 |
| <b>B7L812</b> | TY-2482_chromosome | - | 3176911 | 3177198 | 71.87833533 | 60.46282213 | 70.03517242 | 33.07339262 | 26.33711467 | 27.73564519 | 1.229533835  | 6.252369369 | 5.5448468 |
| <b>B7L813</b> | TY-2482_chromosome | - | 3177205 | 3178890 | 347.8057497 | 280.3461794 | 374.0018714 | 242.5788542 | 230.2658946 | 189.8251453 | 0.633900615  | 2.434188665 | 2.0581443 |
| <b>B7L810</b> | TY-2482_chromosome | + | 3178874 | 3179368 | 446.7281207 | 461.4967746 | 276.4699675 | 131.0172516 | 377.3994944 | 116.8033381 | 0.829317627  | 2.35626826  | 1.9885134 |

|               |                    |   |         |         |             |             |             |             |             |             |              |             |           |
|---------------|--------------------|---|---------|---------|-------------|-------------|-------------|-------------|-------------|-------------|--------------|-------------|-----------|
| <b>E1JD58</b> | TY-2482_chromosome | - | 3179518 | 3179874 | 2301.904248 | 2184.663663 | 2185.297774 | 632.8922717 | 1387.361794 | 674.2620682 | 1.331395273  | 6.594322619 | 5.8628604 |
| <b>E1HWK4</b> | TY-2482_chromosome | + | 3179789 | 3180124 | 33.19406145 | 30.23345534 | 19.26338908 | 18.73613397 | 26.46544986 | 22.39684294 | 0.258361086  | 0.440125908 | 0.3357537 |
| <b>B7L816</b> | TY-2482_chromosome | + | 3180167 | 3181348 | 178.6936745 | 163.5256536 | 197.6469165 | 286.9132573 | 291.207514  | 297.3063234 | -0.647893811 | 3.268453819 | 2.7971926 |
| <b>B7L817</b> | TY-2482_chromosome | - | 3181362 | 3181856 | 339.6762015 | 304.4416105 | 295.5985655 | 247.3258412 | 348.7683529 | 212.3656868 | 0.208962313  | 0.480122556 | 0.3675663 |
| <b>B7L819</b> | TY-2482_chromosome | - | 3181856 | 3182215 | 82.994252   | 93.96945494 | 72.96990962 | 84.10214665 | 80.98026184 | 80.32075667 | -0.04037502  | 0.00994029  | 0.0065011 |
| <b>B7L820</b> | TY-2482_chromosome | - | 3182208 | 3182552 | 111.5248277 | 112.6589349 | 92.09331395 | 94.56360862 | 95.56108614 | 90.87313607 | 0.128117132  | 0.376860763 | 0.286234  |
| <b>B7L818</b> | TY-2482_chromosome | + | 3182661 | 3183107 | 85.91180106 | 92.47340758 | 89.77929571 | 86.55108232 | 96.5027936  | 88.22815072 | -0.026016371 | 0.019369864 | 0.0128505 |
| <b>B7L822</b> | TY-2482_chromosome | - | 3183160 | 3184650 | 98.03174456 | 95.26942863 | 88.29693523 | 94.06224567 | 90.10390593 | 79.18503911 | 0.061669113  | 0.175640694 | 0.1295024 |
| <b>B7L823</b> | TY-2482_chromosome | - | 3184650 | 3186362 | 30.14048725 | 31.80765328 | 16.54084069 | 46.94758284 | 41.87324561 | 31.98073531 | -0.77219982  | 1.518400715 | 1.2510262 |
| <b>B7L821</b> | TY-2482_chromosome | + | 3186499 | 3187419 | 31.57773246 | 20.0888181  | 29.81773242 | 69.58177995 | 54.59412318 | 38.74092563 | -0.981751476 | 3.424976545 | 2.9382338 |
| <b>C8TLC9</b> | TY-2482_chromosome | - | 3187598 | 3188233 | 48.69801883 | 42.05461124 | 45.5223774  | 30.70399102 | 41.07726261 | 26.65906009 | 0.482249642  | 1.146376451 | 0.9295106 |
| <b>B7L827</b> | TY-2482_chromosome | - | 3188236 | 3190110 | 48.80312199 | 41.65524346 | 38.70894797 | 68.4933465  | 45.44208685 | 34.80245855 | -0.292350227 | 0.338716019 | 0.2549046 |
| <b>B7L828</b> | TY-2482_chromosome | + | 3190145 | 3190858 | 17.11071074 | 16.23530685 | 20.65557729 | 47.57592823 | 27.21140577 | 21.62048374 | -0.899028445 | 1.975552469 | 1.650057  |
| <b>B7L824</b> | TY-2482_chromosome | - | 3190861 | 3192519 | 829.4476091 | 783.256676  | 750.5222852 | 924.8172444 | 871.8206926 | 822.4409265 | -0.168395258 | 0.355783998 | 0.268729  |
| <b>D3H311</b> | TY-2482_chromosome | - | 3192719 | 3193150 | 22.56396227 | 24.48573955 | 14.73822447 | 48.74308013 | 49.18561009 | 37.19718672 | -1.24316998  | 4.123963935 | 3.5735214 |
| <b>D3H312</b> | TY-2482_chromosome | - | 3193259 | 3193675 | 79.35192267 | 72.6130311  | 73.19465897 | 161.1988197 | 197.529546  | 191.9890286 | -1.251105168 | 9.622501314 | 8.7152041 |
| <b>B7L832</b> | TY-2482_chromosome | + | 3193975 | 3194304 | 356.5004284 | 434.1030372 | 392.8030877 | 329.5518538 | 347.6467362 | 345.9951086 | 0.175321129  | 0.511151707 | 0.3933937 |
| <b>B7L833</b> | TY-2482_chromosome | - | 3194312 | 3195523 | 1061.891328 | 1058.946745 | 1092.719168 | 1007.625819 | 859.93119   | 932.7994776 | 0.190626793  | 0.500907215 | 0.385133  |
| <b>B7L829</b> | TY-2482_chromosome | + | 3195624 | 3196685 | 52.9912422  | 47.83455071 | 65.06797662 | 55.53162697 | 47.31429312 | 38.53383137 | 0.241947728  | 0.455347246 | 0.3476955 |
| <b>B7L834</b> | TY-2482_chromosome | - | 3196688 | 3197977 | 53.17248985 | 29.34220537 | 63.99270547 | 51.35749318 | 31.76472406 | 28.08883664 | 0.473268841  | 0.776177002 | 0.6152798 |
| <b>B7L836</b> | TY-2482_chromosome | - | 3198100 | 3199245 | 66.26486417 | 88.84362112 | 81.275116   | 63.56552111 | 33.47241773 | 57.67253586 | 0.541830332  | 1.797730535 | 1.4949843 |
| <b>B7L835</b> | TY-2482_chromosome | - | 3199245 | 3199859 | 54.53317616 | 54.46294956 | 58.17166567 | 39.95822052 | 17.99966703 | 35.31422931 | 0.826547074  | 2.728579328 | 2.3216012 |
| <b>B7L838</b> | TY-2482_chromosome | - | 3199846 | 3200721 | 117.3027691 | 128.4046307 | 123.4486373 | 102.1067092 | 62.59643601 | 106.1770915 | 0.430794779  | 1.354950718 | 1.1096638 |
| <b>B7L837</b> | TY-2482_chromosome | - | 3200721 | 3201407 | 189.8370451 | 191.2226564 | 215.4380973 | 142.1604857 | 142.7898012 | 200.695572  | 0.373048565  | 0.821890516 | 0.6539066 |
| <b>B7L840</b> | TY-2482_chromosome | + | 3201685 | 3202338 | 273.0330324 | 240.6701719 | 269.4338199 | 124.7851296 | 124.6782181 | 119.8117851 | 1.112110715  | 7.140619847 | 6.3772489 |
| <b>B7L841</b> | TY-2482_chromosome | - | 3202390 | 3203199 | 1789.595497 | 1657.160356 | 1829.60112  | 1195.167755 | 1073.765929 | 1371.850817 | 0.584056652  | 2.014442088 | 1.6842837 |
| <b>C3SLN7</b> | TY-2482_chromosome | - | 3203317 | 3203721 | 120.4806255 | 97.12248844 | 124.3195577 | 48.61888562 | 89.40787596 | 60.71827332 | 0.878623093  | 3.230858373 | 2.7649156 |
| <b>B7L843</b> | TY-2482_chromosome | - | 3203955 | 3206366 | 4498.150355 | 4736.855882 | 4772.214816 | 8455.374556 | 7227.523672 | 9189.292593 | -0.820630607 | 1.510472328 | 1.2438236 |
| <b>B7L842</b> | TY-2482_chromosome | - | 3206398 | 3207468 | 412.041599  | 412.2373961 | 409.9676763 | 635.330024  | 735.3260693 | 802.2563549 | -0.779169231 | 4.015551296 | 3.4738084 |
| <b>B7L845</b> | TY-2482_chromosome | - | 3207471 | 3208568 | 1407.609423 | 1209.047328 | 1258.303152 | 1649.994393 | 1956.644214 | 1973.280476 | -0.472052407 | 2.002743537 | 1.6742174 |
| <b>B7L846</b> | TY-2482_chromosome | - | 3208576 | 3209976 | 1213.606333 | 1265.037343 | 1367.515444 | 2495.085295 | 2093.032953 | 2403.56864  | -0.859607329 | 4.129315514 | 3.5781965 |
| <b>B5YXA5</b> | TY-2482_chromosome | - | 3210273 | 3210470 | 615.5964946 | 662.6768911 | 454.2848672 | 198.8122981 | 429.0295283 | 225.5111394 | 0.965367463  | 4.013373534 | 3.4719617 |
| <b>B7L844</b> | TY-2482_chromosome | + | 3210740 | 3211096 | 1699.569394 | 1192.040239 | 1277.951922 | 2152.169777 | 2653.701072 | 3174.059419 | -0.820334985 | 3.093312111 | 2.6424078 |
| <b>B7L848</b> | TY-2482_chromosome | + | 3211063 | 3211317 | 796.8257231 | 639.6289908 | 588.537445  | 1173.804233 | 1152.003133 | 1750.290969 | -0.930001976 | 5.130703858 | 4.4987078 |
| <b>B7L849</b> | TY-2482_chromosome | + | 3211323 | 3212966 | 4156.822187 | 3241.813511 | 3372.273241 | 9008.687823 | 8974.853366 | 11521.69635 | -1.37762381  | 3.667792811 | 3.1545752 |
| <b>B7L851</b> | TY-2482_chromosome | + | 3213075 | 3214436 | 770.239316  | 772.916391  | 782.3769889 | 712.9580868 | 562.2073553 | 1038.3802   | 0.073809724  | 0.011984566 | 0.0078734 |
| <b>B7L853</b> | TY-2482_chromosome | + | 3214977 | 3216389 | 228.4584607 | 325.0682466 | 283.2644696 | 8775.193203 | 7448.660024 | 9654.98923  | -5.004421949 | 28.28653108 | 26.823085 |
| <b>B7L854</b> | TY-2482_chromosome | + | 3216483 | 3217727 | 35.82871203 | 32.11803318 | 41.84511954 | 408.745757  | 419.4471704 | 580.8754114 | -3.56867923  | 46.91247072 | 45.085634 |
| <b>B7L855</b> | TY-2482_chromosome | + | 3217863 | 3219035 | 99.75140327 | 80.62239052 | 76.28915323 | 95.64183388 | 108.3150275 | 109.1133481 | -0.251738499 | 0.7674956   | 0.6083864 |
| <b>B7L852</b> | TY-2482_chromosome | + | 3219013 | 3219969 | 294.9219432 | 247.942399  | 233.4244203 | 192.729788  | 244.8873085 | 217.1152921 | 0.274936905  | 0.640501851 | 0.5003277 |
| <b>B7L857</b> | TY-2482_chromosome | + | 3220117 | 3220875 | 1622.972854 | 1445.640197 | 1426.599211 | 986.9704384 | 937.2924295 | 1098.316992 | 0.600215195  | 2.314537208 | 1.9536332 |
| <b>B7L858</b> | TY-2482_chromosome | + | 3220900 | 3221463 | 1391.252375 | 1050.39915  | 1243.227706 | 2017.444421 | 2102.247734 | 1909.11913  | -0.657656498 | 3.224913833 | 2.7595272 |
| <b>B7L859</b> | TY-2482_chromosome | - | 3221523 | 3222857 | 894.6226503 | 763.3417726 | 772.3107944 | 1349.629374 | 1314.293583 | 1314.293583 | -0.650049312 | 3.059817463 | 2.613192  |
| <b>B7L856</b> | TY-2482_chromosome | + | 3223024 | 3223686 | 313.3287572 | 336.5716821 | 288.9441597 | 303.8279652 | 379.6045874 | 300.2037896 | -0.103630017 | 0.129172213 | 0.0942118 |
| <b>B7L861</b> | TY-2482_chromosome | + | 3223756 | 3224226 | 25.47018457 | 23.54318028 | 23.69774407 | 40.96612471 | 40.09253174 | 26.78484597 | -0.610238829 | 1.365606523 | 1.1192252 |
| <b>B7L862</b> | TY-2482_chromosome | + | 3224278 | 3224862 | 126.2119304 | 146.1617992 | 139.3279599 | 83.11509844 | 75.56035627 | 55.74812147 | 0.8610066    | 5.104775167 | 4.4748133 |
| <b>B7L863</b> | TY-2482_chromosome | - | 3224930 | 3225649 | 76.13841281 | 75.60188188 | 92.07078415 | 54.79558104 | 74.72124917 | 63.20804277 | 0.396655022  | 0.929258865 | 0.7431081 |
| <b>B7L864</b> | TY-2482_chromosome | - | 3225667 | 3226860 | 47.01504835 | 51.29592382 | 50.18733226 | 54.28996623 | 38.12973666 | 42.24629771 | 0.089059532  | 0.214743927 | 0.1588675 |
| <b>B7L866</b> | TY-2482_chromosome | - | 3228565 | 3229956 | 21.77674124 | 14.59427993 | 21.9225994  | 42.8212959  | 38.19223762 | 38.25339779 | -0.957101224 | 3.48110659  | 2.9887828 |
| <b>B7L867</b> | TY-2482_chromosome | - | 3229978 | 3231852 | 42.01084978 | 34.45574125 | 37.56725927 | 47.2499417  | 42.7091019  | 52.43795854 | -0.273399367 | 0.647373531 | 0.5056196 |
| <b>B7L870</b> | TY-2482_chromosome | - | 3233111 | 3233833 | 774.8976604 | 675.8494329 | 716.3009109 | 379.6585374 | 325.7081484 | 395.8180558 | 1.007503939  | 5.770498825 | 5.0934244 |
| <b>B7L868</b> | TY-2482_chromosome | - | 3233851 | 3234621 | 554.2003244 | 543.4487174 | 510.8589518 | 247.4746581 | 249.3304218 | 268.2767124 | 1.074929978  | 6.868279589 | 6.1195584 |
| <b>B7L872</b> | TY-2482_chromosome | - | 3234715 | 3235602 | 193.873738  | 184.9914776 | 150.7824045 | 86.64941677 | 80.02521115 | 94.55166523 | 1.000547712  | 6.214361065 | 5.6024492 |
| <b>B7L873</b> | TY-2482_chromosome | - | 3235605 | 3236561 | 185.1362479 | 130.5790317 | 139.7214154 | 97.05878593 | 88.18239498 | 119.3236078 | 0.660521875  | 2.140535872 | 1.8852497 |
| <b>B7L874</b> | TY-2482_chromosome | - | 3236651 | 3237688 | 340.5001142 | 311.4998034 | 261.0350486 | 131.8155188 | 152.9461538 | 135.6127027 | 1.103472421  | 7.067094749 | 6.3092074 |
| <b>B7L871</b> | TY-2482_chromosome | - | 3237939 | 3239009 | 65.35188757 | 58.80341354 | 43.05381758 | 40.78377872 | 55.75259155 | 19.26674002 | 0.422437295  | 1.078155988 | 0.8704433 |
| <b>B7L876</b> | TY-2482_chromosome | - | 3239023 | 3241542 | 233.8470317 | 292.1937782 | 256.0997726 | 121.9854603 | 150.2704774 | 113.447452  | 0.960477204  | 5.838711457 | 5.1561742 |

|               |                    |   |         |         |             |             |             |             |             |             |              |             |           |
|---------------|--------------------|---|---------|---------|-------------|-------------|-------------|-------------|-------------|-------------|--------------|-------------|-----------|
| <b>B7L875</b> | TY-2482_chromosome | - | 3242349 | 3242918 | 132.2327269 | 144.0760026 | 145.3169339 | 71.88369634 | 99.32022628 | 77.78667147 | 0.765600747  | 3.66784712  | 3.1545752 |
| <b>B7L879</b> | TY-2482_chromosome | - | 3243223 | 3245049 | 12504.00902 | 10814.37818 | 11637.26744 | 15792.22318 | 14138.46527 | 17978.86528 | -0.404525738 | 0.587313557 | 0.4561068 |
| <b>B7L878</b> | TY-2482_chromosome | - | 3245214 | 3246581 | 7285.490355 | 6497.44852  | 7453.520924 | 11051.50634 | 9701.992104 | 10798.51913 | -0.538167181 | 0.85045403  | 0.6769717 |
| <b>A1AHR3</b> | TY-2482_chromosome | + | 3246827 | 3247372 | 16267.13614 | 14281.22966 | 14900.76352 | 14192.62884 | 12174.58676 | 14115.13034 | 0.186984434  | 0.168715293 | 0.1242669 |
| <b>B7L882</b> | TY-2482_chromosome | - | 3247375 | 3248754 | 41384.05932 | 36649.47375 | 37406.81581 | 42705.25995 | 29480.03428 | 41757.36297 | 0.028524402  | 0.015699234 | 0.0102412 |
| <b>B7L880</b> | TY-2482_chromosome | - | 3248784 | 3249644 | 21167.00513 | 18685.6542  | 18609.21874 | 21869.93617 | 16212.42705 | 20962.85204 | -0.011227581 | 0.012208628 | 0.0079053 |
| <b>B7L884</b> | TY-2482_chromosome | - | 3249698 | 3251236 | 44060.63009 | 36874.00009 | 39250.21403 | 56173.19511 | 45671.73434 | 57073.81333 | -0.371106953 | 0.467350535 | 0.3576211 |
| <b>Q1R4J7</b> | TY-2482_chromosome | + | 3251423 | 3252157 | 24390.35941 | 18339.07626 | 20356.23843 | 25498.78619 | 21905.76178 | 26108.22061 | -0.167963771 | 0.226877415 | 0.1677421 |
| <b>B7L883</b> | TY-2482_chromosome | - | 3252332 | 3252568 | 8677.389906 | 7447.510841 | 7425.474171 | 7670.638342 | 6947.278506 | 7584.477443 | 0.099307457  | 0.083582719 | 0.0613264 |
| <b>B7L888</b> | TY-2482_chromosome | - | 3252618 | 3253430 | 6478.716587 | 5387.383617 | 5905.102622 | 7587.122538 | 7603.474442 | 7584.548612 | -0.32047901  | 0.459480355 | 0.3508521 |
| <b>B7L887</b> | TY-2482_chromosome | - | 3253442 | 3253819 | 1110.558417 | 1092.264899 | 1070.818091 | 996.6915131 | 1388.976204 | 811.0629995 | 0.009952637  | 0.055559546 | 0.0392716 |
| <b>B7L890</b> | TY-2482_chromosome | - | 3254439 | 3255059 | 353.0088933 | 330.3743336 | 350.6038477 | 786.3251836 | 1088.56496  | 869.7798609 | -1.371661831 | 10.43668791 | 9.4874596 |
| <b>B7L889</b> | TY-2482_chromosome | - | 3255126 | 3257012 | 1546.559405 | 1578.509533 | 1412.682831 | 5543.966449 | 5253.658984 | 6317.308654 | -1.918111343 | 6.493425062 | 5.7703304 |
| <b>B7L892</b> | TY-2482_chromosome | - | 3257394 | 3257834 | 525.5504859 | 609.6316444 | 571.0885858 | 2268.046353 | 3207.251033 | 1977.932247 | -2.170363295 | 19.75957271 | 18.478625 |
| <b>B7L893</b> | TY-2482_chromosome | - | 3257927 | 3258382 | 158.9999172 | 216.8522397 | 178.8177289 | 90.80168279 | 124.7578807 | 116.9809434 | 0.701863599  | 3.257063601 | 2.7871663 |
| <b>B7L891</b> | TY-2482_chromosome | + | 3258534 | 3259523 | 759.8204301 | 699.0253285 | 781.1634247 | 881.3146179 | 961.0827994 | 785.7220892 | -0.216304909 | 0.622325013 | 0.4856844 |
| <b>B7L895</b> | TY-2482_chromosome | - | 3259534 | 3260982 | 2228.599902 | 2186.88338  | 2090.169356 | 352.6521483 | 336.6825571 | 361.7349851 | 0.262553005  | 34.46533445 | 35.859067 |
| <b>B7L896</b> | TY-2482_chromosome | - | 3260979 | 3262472 | 4593.213858 | 4407.852352 | 4727.351365 | 453.8358074 | 398.5195201 | 478.6984483 | 3.391423168  | 17.82424162 | 16.594648 |
| <b>B7L897</b> | TY-2482_chromosome | + | 3262695 | 3264560 | 433.0215676 | 402.6195386 | 436.4694984 | 382.8152905 | 394.971462  | 381.5879788 | 0.156730941  | 0.296199945 | 0.2216257 |
| <b>B7L894</b> | TY-2482_chromosome | + | 3264730 | 3265146 | 191.2542002 | 245.2221366 | 193.2140725 | 118.5643496 | 154.8220808 | 123.8485935 | 0.596933501  | 2.779451939 | 2.3648781 |
| <b>B7L899</b> | TY-2482_chromosome | + | 3265157 | 3266659 | 143.6471231 | 148.6107356 | 122.4846377 | 227.7233724 | 178.310858  | 170.0252162 | -0.56000407  | 1.691386334 | 1.4044003 |
| <b>B7L8A0</b> | TY-2482_chromosome | + | 3266667 | 3267629 | 810.7870441 | 813.1164171 | 652.5483604 | 526.591752  | 424.9600988 | 368.8157195 | 0.687631318  | 3.558907024 | 3.0585266 |
| <b>B7L8A1</b> | TY-2482_chromosome | + | 3267657 | 3268544 | 2704.127858 | 2794.670647 | 2752.493028 | 2921.78175  | 3159.766849 | 2574.974046 | -0.093562209 | 0.072967957 | 0.0526105 |
| <b>B5YY10</b> | TY-2482_chromosome | + | 3268658 | 3269523 | 727.6550479 | 688.4215177 | 737.5330343 | 1188.420985 | 933.6280177 | 956.0593583 | -0.546068248 | 2.225878282 | 1.8731721 |
| <b>B7L8A3</b> | TY-2482_chromosome | + | 3269606 | 3270595 | 731.3930943 | 777.0044713 | 659.2973558 | 543.9405569 | 491.3938015 | 492.1552309 | 0.449319865  | 1.876626114 | 1.5650007 |
| <b>B7L8A4</b> | TY-2482_chromosome | - | 3270567 | 3271991 | 1799.99543  | 1877.521448 | 1803.034957 | 562.6612976 | 617.9569765 | 582.8663236 | 1.629445558  | 14.75641737 | 13.627271 |
| <b>B7L898</b> | TY-2482_chromosome | - | 3272017 | 3272706 | 2436.223585 | 2768.815967 | 2913.817362 | 837.465946  | 837.2840121 | 701.5513015 | 1.742405183  | 16.30756077 | 15.120972 |
| <b>E9WNY3</b> | TY-2482_chromosome | - | 3273100 | 3273333 | 124753.348  | 570273.1123 | 245639.7361 | 42498.11875 | 65734.72703 | 121911.0399 | 1.789032838  | 3.667229231 | 3.1545537 |
| <b>rrsD</b>   | TY-2482_chromosome | + | 3273187 | 3274728 | 865846.7936 | 3835376.966 | 1867803.977 | 203826.6413 | 239861.9908 | 766092.9569 | 2.30533629   | 4.454482396 | 3.8786394 |
| <b>Q57H85</b> | TY-2482_chromosome | + | 3274308 | 3274625 | 212115.8979 | 947810.7811 | 430677.238  | 14144.2374  | 17791.12336 | 87732.00913 | 3.658437741  | 7.565959059 | 6.7787697 |
| <b>ileT</b>   | TY-2482_chromosome | + | 3274797 | 3274873 | 485.5912943 | 542.7585459 | 273.6578243 | 118.5819056 | 344.6812177 | 89.30420049 | 1.087630284  | 3.427302907 | 2.9402682 |
| <b>alaT</b>   | TY-2482_chromosome | + | 3274916 | 3274991 | 326.5429379 | 289.9567635 | 178.042858  | 122.0220654 | 321.9239199 | 72.30140148 | 0.526691462  | 1.136230535 | 0.9204608 |
| <b>rrlE</b>   | TY-2482_chromosome | + | 3275175 | 3278078 | 487709.3181 | 5076912.29  | 1355130.915 | 1123196.727 | 931346.3547 | 4979993.398 | -0.417760475 | 0.012616826 | 0.0081495 |
| <b>Q1R3T8</b> | TY-2482_chromosome | - | 3275401 | 3275703 | 85962.77924 | 712582.6458 | 230737.9444 | 297626.8088 | 245759.0279 | 1188536.359 | -1.072491133 | 0.630905771 | 0.4920437 |
| <b>C1HUN3</b> | TY-2482_chromosome | - | 3276761 | 3276964 | 47578.40761 | 599810.4111 | 148749.708  | 121413.9925 | 101060.8032 | 597982.7426 | -0.462557246 | 0.02654236  | 0.0152692 |
| <b>C1HUN1</b> | TY-2482_chromosome | - | 3277041 | 3277493 | 88841.92623 | 1000761.893 | 244285.6674 | 71049.53678 | 42619.96919 | 477708.4319 | 0.821516977  | 0.957439372 | 0.7665888 |
| <b>C1HUN0</b> | TY-2482_chromosome | - | 3277497 | 3277853 | 74729.46513 | 765230.3384 | 206157.2011 | 47884.8261  | 30721.04655 | 335043.1362 | 1.034675596  | 1.184944455 | 0.9622385 |
| <b>Q1RFY5</b> | TY-2482_chromosome | - | 3278057 | 3278332 | 5106.69588  | 24636.21427 | 3013.561005 | 18065.46296 | 146364.8713 | 16402.06942 | -3.197744441 | 3.088592798 | 2.638494  |
| <b>rrfC</b>   | TY-2482_chromosome | + | 3278171 | 3278290 | 3695.033332 | 13965.69541 | 200.9984743 | 15135.12272 | 142397.2224 | 6275.859656 | -4.047362462 | 3.137675658 | 2.6802731 |
| <b>Q8CLS5</b> | TY-2482_chromosome | - | 3278298 | 3278420 | 1552.039391 | 1791.132372 | 773.270481  | 1093.167476 | 2670.624766 | 1115.1547   | -0.403694573 | 0.371380319 | 0.2814086 |
| <b>aspT</b>   | TY-2482_chromosome | + | 3278343 | 3278419 | 1505.024271 | 1580.964128 | 757.4896678 | 839.0281885 | 2099.155561 | 782.4267956 | -0.084573516 | 0.05535019  | 0.039161  |
| <b>trpT</b>   | TY-2482_chromosome | + | 3278428 | 3278503 | 1384.740007 | 1296.286394 | 706.0738813 | 486.9680622 | 1311.100226 | 444.3841514 | 0.504778416  | 1.25401823  | 1.0211839 |
| <b>B7L8A6</b> | TY-2482_chromosome | - | 3278602 | 3279438 | 443.2910334 | 489.2546544 | 504.5461806 | 582.6730371 | 584.2965002 | 476.6183386 | -0.227922669 | 0.464837625 | 0.355598  |
| <b>Q8D1L6</b> | TY-2482_chromosome | + | 3279476 | 3279892 | 1333.65338  | 1116.237869 | 1105.008789 | 540.5031504 | 1072.489198 | 457.3876312 | 0.789377511  | 2.733248618 | 2.3257844 |
| <b>B7L8A8</b> | TY-2482_chromosome | - | 3279923 | 3281470 | 209.4084361 | 215.9032333 | 193.2528018 | 174.5751949 | 140.1176148 | 118.8545249 | 0.429761434  | 1.850902791 | 1.5431602 |
| <b>B7L8B0</b> | TY-2482_chromosome | + | 3282031 | 3283674 | 519.8112868 | 494.8302516 | 485.8223228 | 492.3643079 | 354.7977018 | 414.4840214 | 0.220320005  | 0.64593579  | 0.5048408 |
| <b>B7L8A7</b> | TY-2482_chromosome | + | 3283674 | 3283934 | 148.3060973 | 110.1473717 | 134.0506144 | 143.7705182 | 109.9465951 | 182.2474871 | -0.050971143 | 0.2854321   | 0.213236  |
| <b>B7L8B1</b> | TY-2482_chromosome | + | 3283957 | 3284883 | 1026.026065 | 971.8487058 | 1062.410863 | 1271.631764 | 952.6737489 | 1308.755537 | -0.182708387 | 0.480433302 | 0.3677537 |
| <b>B7L8B3</b> | TY-2482_chromosome | + | 3284951 | 3286798 | 1168.147862 | 1092.884492 | 1172.620219 | 1557.902786 | 1127.373138 | 1726.941099 | -0.32659175  | 1.021382286 | 0.8205234 |
| <b>B7L8B4</b> | TY-2482_chromosome | + | 3286804 | 3288345 | 928.013245  | 930.1808259 | 969.9411632 | 1179.482973 | 1102.932939 | 1218.165514 | -0.295547    | 0.894755447 | 0.7152729 |
| <b>B7L8B2</b> | TY-2482_chromosome | - | 3288403 | 3289293 | 1092.315779 | 1330.846569 | 1302.76056  | 666.981047  | 766.3025215 | 735.4082622 | 0.770657454  | 4.133431076 | 3.5819735 |
| <b>B7L8B5</b> | TY-2482_chromosome | + | 3289443 | 3290915 | 18864.92339 | 19213.14201 | 19593.81887 | 20176.00937 | 18057.17895 | 20197.24293 | -0.018241273 | 0.016294845 | 0.0104512 |
| <b>E9WNG1</b> | TY-2482_chromosome | - | 3291008 | 3291330 | 756.0865332 | 744.4905213 | 724.1814923 | 386.3716088 | 602.7105709 | 367.5615649 | 0.709324899  | 2.848621875 | 2.426317  |
| <b>B7L8B8</b> | TY-2482_chromosome | - | 3291488 | 3291976 | 103.7808896 | 127.4013955 | 108.14939   | 58.05180027 | 57.39220186 | 38.66092993 | 1.032345826  | 3.626721963 | 3.6138286 |
| <b>B7L8B9</b> | TY-2482_chromosome | + | 3292151 | 3294169 | 404.4563039 | 450.1365946 | 422.5025655 | 488.6826865 | 413.9756476 | 511.5712558 | -0.16610527  | 0.329715254 | 0.2479763 |
| <b>B7L8C0</b> | TY-2482_chromosome | - | 3294222 | 3295703 | 2299.983988 | 1796.543609 | 1758.550418 | 2377.991189 | 2125.795264 | 2592.836152 | -0.239064106 | 0.420844824 | 0.3206874 |
| <b>B7L8B6</b> | TY-2482_chromosome | - | 3295840 | 3297102 | 4331.830134 | 3375.704632 | 3460.056237 | 5841.46522  | 5805.185191 | 6374.010568 | -0.643135069 | 1.185276158 | 0.9622522 |

|               |                    |   |         |         |             |             |             |              |             |             |              |             |           |
|---------------|--------------------|---|---------|---------|-------------|-------------|-------------|--------------|-------------|-------------|--------------|-------------|-----------|
| <b>A1AHV1</b> | TY-2482_chromosome | - | 3297230 | 3297619 | 6267.668047 | 6084.300772 | 6027.207791 | 4676.140376  | 6442.40964  | 4977.193674 | 0.205820794  | 0.210671605 | 0.155876  |
| <b>B7L8C4</b> | TY-2482_chromosome | + | 3297889 | 3299145 | 4215.019286 | 3601.948502 | 3691.233532 | 11746.6243   | 11455.65114 | 14608.16454 | -1.65783242  | 4.783639052 | 4.1762173 |
| <b>B7L8C1</b> | TY-2482_chromosome | + | 3299158 | 3299373 | 160.8128549 | 157.2440072 | 153.0791098 | 137.5138512  | 157.4210294 | 185.1271281 | 0.016973618  | 0.038383242 | 0.026127  |
| <b>B7L8C6</b> | TY-2482_chromosome | + | 3299388 | 3300488 | 1258.767384 | 1082.921815 | 1154.69447  | 1002.523604  | 1150.330162 | 1160.260062 | 0.130360298  | 0.149610098 | 0.1088355 |
| <b>B7L8C7</b> | TY-2482_chromosome | + | 3300503 | 3301546 | 1116.535664 | 1181.419259 | 1002.613849 | 1313.262757  | 1392.373258 | 1461.531151 | -0.357341866 | 1.014702274 | 0.8148999 |
| <b>B7L8C8</b> | TY-2482_chromosome | + | 3301605 | 3302732 | 1127.686065 | 1080.162122 | 1228.221958 | 1947.019324  | 1903.766506 | 2290.180757 | -0.782295774 | 4.3952383   | 3.8257978 |
| <b>B7L8C5</b> | TY-2482_chromosome | + | 3302732 | 3303991 | 1524.101139 | 1496.762797 | 1496.706152 | 2063.454812  | 1785.422155 | 2237.601259 | -0.416203039 | 1.44573368  | 1.1883053 |
| <b>B7L8D0</b> | TY-2482_chromosome | + | 3303994 | 3305058 | 1505.340876 | 1550.608129 | 1540.315641 | 1663.351547  | 1508.762454 | 2004.570715 | -0.146180968 | 0.388783459 | 0.2951676 |
| <b>B7L8D1</b> | TY-2482_chromosome | + | 3305080 | 3305958 | 1334.990057 | 1206.251726 | 1257.698544 | 1486.184501  | 1341.343797 | 1568.045867 | -0.183674919 | 0.514405211 | 0.3957644 |
| <b>B7L8C9</b> | TY-2482_chromosome | + | 3305939 | 3306610 | 852.5250629 | 832.3777811 | 860.9600473 | 782.2946879  | 687.0256711 | 755.139824  | 0.196600443  | 0.51312844  | 0.3948348 |
| <b>B7L8D3</b> | TY-2482_chromosome | + | 3306618 | 3307745 | 1231.547422 | 1308.615427 | 1376.722471 | 1676.7329782 | 1459.648862 | 1657.598855 | -0.291694431 | 0.812166221 | 0.6462786 |
| <b>B7L8D4</b> | TY-2482_chromosome | + | 3307750 | 3308997 | 846.3637165 | 952.6907226 | 958.7595342 | 785.4279744  | 736.1795044 | 824.7686443 | 0.228210015  | 0.64897343  | 0.5070876 |
| <b>B7L8D5</b> | TY-2482_chromosome | + | 3308997 | 3310073 | 600.457005  | 605.5654441 | 626.6091867 | 560.8464711  | 573.3504306 | 530.3364715 | 0.136200019  | 0.306712385 | 0.229771  |
| <b>B7L952</b> | TY-2482_chromosome | + | 3310073 | 3311422 | 519.748869  | 527.8332428 | 496.3674403 | 432.3423286  | 536.0587033 | 549.7196315 | 0.049537978  | 0.04186485  | 0.0287268 |
| <b>B7L953</b> | TY-2482_chromosome | + | 3311428 | 3312165 | 497.2696192 | 537.5526162 | 473.8578267 | 600.77022    | 616.996693  | 652.4454637 | -0.330206645 | 0.891934897 | 0.7128837 |
| <b>B7L954</b> | TY-2482_chromosome | + | 3312359 | 3313741 | 462.0592423 | 504.357622  | 477.9623811 | 277.4946888  | 290.2580556 | 354.8308599 | 0.66543187   | 2.757039278 | 2.3459122 |
| <b>argX</b>   | TY-2482_chromosome | + | 3313847 | 3313923 | 654.9992799 | 821.6017089 | 574.59028   | 420.9638515  | 781.1722137 | 425.5214728 | 0.242912669  | 0.756412202 | 0.5989471 |
| <b>hisR</b>   | TY-2482_chromosome | + | 3313981 | 3314057 | 657.1326626 | 797.2727962 | 720.2714578 | 738.3859597  | 1131.442863 | 705.660733  | -0.287259524 | 0.596507934 | 0.4636407 |
| <b>leuQ</b>   | TY-2482_chromosome | + | 3314078 | 3314164 | 640.0720405 | 732.6959528 | 601.8638319 | 530.2034654  | 802.8979504 | 518.7934142 | 0.040093661  | 0.166984605 | 0.1228523 |
| <b>proM</b>   | TY-2482_chromosome | + | 3314207 | 3314283 | 134.7657938 | 128.4844134 | 108.596059  | 115.8670775  | 165.7965842 | 118.6939604 | -0.123069572 | 0.212630417 | 0.1576189 |
| <b>B7L956</b> | TY-2482_chromosome | + | 3314430 | 3315662 | 51.64206829 | 55.6880529  | 43.26024152 | 102.3453959  | 80.04923794 | 67.53952814 | -0.842337513 | 2.724354674 | 2.318347  |
| <b>ryiA</b>   | TY-2482_chromosome | + | 3316335 | 3316506 | 7463.410775 | 6938.667997 | 2506.780549 | 410.8132074  | 2665.788835 | 368.5844759 | 2.164450361  | 4.091169096 | 3.543086  |
| <b>B7L958</b> | TY-2482_chromosome | - | 3316592 | 3317785 | 3325.730671 | 3009.352021 | 3160.511244 | 6972.498699  | 6085.424944 | 7385.654447 | -1.077882193 | 2.480498754 | 2.0987623 |
| <b>B7L955</b> | TY-2482_chromosome | - | 3317791 | 3318999 | 4430.967357 | 4219.715104 | 4389.24187  | 6625.792901  | 5710.485058 | 6809.462573 | -0.538282282 | 0.853063257 | 0.6789115 |
| <b>B7L960</b> | TY-2482_chromosome | - | 3319024 | 3319761 | 2289.101954 | 2292.661078 | 2323.365829 | 2639.590244  | 2051.126231 | 2649.444854 | -0.088018727 | 0.096664536 | 0.0710902 |
| <b>B5YY51</b> | TY-2482_chromosome | - | 3319761 | 3320714 | 4152.706416 | 4096.00008  | 4336.494337 | 4770.580058  | 3945.875864 | 4905.730457 | -0.099207921 | 0.121285906 | 0.0890958 |
| <b>D7XDC1</b> | TY-2482_chromosome | - | 3320855 | 3321058 | 2042.258756 | 2286.292106 | 1998.349944 | 497.9528923  | 730.0283882 | 565.8826683 | 1.800581321  | 15.71543572 | 14.547452 |
| <b>B7L961</b> | TY-2482_chromosome | + | 3321086 | 3323629 | 8766.128369 | 8773.462878 | 8985.156059 | 5227.350941  | 5572.245439 | 5763.613382 | 0.699906817  | 1.11781223  | 0.9039151 |
| <b>B7L964</b> | TY-2482_chromosome | - | 3324043 | 3325365 | 90.66048802 | 87.07538223 | 69.58728611 | 72.23539209  | 81.07324806 | 60.86106997 | 0.152837077  | 0.433875637 | 0.3310737 |
| <b>B7L965</b> | TY-2482_chromosome | - | 3325365 | 3326870 | 111.4702074 | 103.6163366 | 108.2584096 | 45.90189887  | 60.22828515 | 33.44219513 | 1.193040882  | 6.837142634 | 6.0921402 |
| <b>B7L962</b> | TY-2482_chromosome | + | 3328112 | 3328312 | 1175.4693   | 1267.138796 | 1278.276813 | 701.6798125  | 937.4898396 | 739.5810691 | 0.64970145   | 2.724004523 | 2.318288  |
| <b>B7L969</b> | TY-2482_chromosome | + | 3328352 | 3329173 | 1915.730807 | 2232.667398 | 2227.086634 | 2027.341269  | 1946.576165 | 1993.177275 | 0.074713779  | 0.141069409 | 0.1034192 |
| <b>B7L970</b> | TY-2482_chromosome | + | 3329173 | 3329877 | 1232.238449 | 1349.805771 | 1451.404238 | 1330.043662  | 1086.497196 | 1320.738587 | 0.111078724  | 0.223816605 | 0.1657703 |
| <b>B7L968</b> | TY-2482_chromosome | + | 3329877 | 3330770 | 1262.309755 | 1206.332938 | 1354.959783 | 1222.961357  | 1027.354871 | 1224.70688  | 0.163255275  | 0.302939188 | 0.2625655 |
| <b>B7L971</b> | TY-2482_chromosome | + | 3330773 | 3331486 | 622.1290455 | 611.1474345 | 678.8826009 | 709.847251   | 665.1816807 | 787.8262642 | -0.139569113 | 0.425998795 | 0.3251217 |
| <b>B7L973</b> | TY-2482_chromosome | + | 3331573 | 3333732 | 1106.889353 | 1015.497816 | 1040.463015 | 1621.422     | 1419.577088 | 1832.321613 | -0.590474233 | 2.564449853 | 2.1734481 |
| <b>B7L974</b> | TY-2482_chromosome | - | 3333885 | 3334646 | 61.29429133 | 66.3362689  | 57.93533769 | 55.74929925  | 46.43741083 | 28.28669117 | 0.390467946  | 1.267416629 | 1.0329526 |
| <b>B7L972</b> | TY-2482_chromosome | + | 3335016 | 3335963 | 483.2403932 | 390.7652444 | 474.8382959 | 906.3265635  | 905.5123332 | 840.8359708 | -0.929578923 | 5.87215908  | 5.1868643 |
| <b>B7L982</b> | TY-2482_chromosome | - | 3338672 | 3339556 | 219.098449  | 211.7500613 | 225.1928139 | 225.0509037  | 278.5877036 | 217.3438523 | -0.123308668 | 0.291494061 | 0.217942  |
| <b>D3H4V8</b> | TY-2482_chromosome | - | 3339611 | 3340093 | 63.60606609 | 50.74135614 | 68.23962043 | 77.61897028  | 72.7939867  | 68.57272039 | -0.210345856 | 0.598203538 | 0.4649386 |
| <b>B7L984</b> | TY-2482_chromosome | + | 3340240 | 3341106 | 473.3117393 | 511.9720831 | 469.308689  | 1023.759064  | 1117.593676 | 980.3149205 | -1.13290269  | 7.709634072 | 6.9124198 |
| <b>B7L985</b> | TY-2482_chromosome | + | 3341242 | 3343068 | 679.8790049 | 623.9266894 | 633.0800839 | 993.6289897  | 924.5592993 | 1031.334755 | -0.589118969 | 2.777425899 | 2.3632749 |
| <b>B7L983</b> | TY-2482_chromosome | + | 3343135 | 3343752 | 809.1496159 | 768.3421974 | 839.2517576 | 835.0279105  | 1127.732074 | 781.8843436 | -0.166321945 | 0.439631724 | 0.3355015 |
| <b>B7L987</b> | TY-2482_chromosome | - | 3343820 | 3344437 | 181.77279   | 160.8481676 | 183.6393635 | 160.9760127  | 167.5001065 | 135.830948  | 0.193702795  | 0.437003792 | 0.3334778 |
| <b>B7L988</b> | TY-2482_chromosome | + | 3344548 | 3345567 | 1044.850818 | 902.7332616 | 996.3095783 | 797.105113   | 921.0457269 | 785.6053168 | 0.267569636  | 0.646069816 | 0.5048408 |
| <b>B7L986</b> | TY-2482_chromosome | + | 3345578 | 3346375 | 421.6496445 | 485.7492182 | 429.0220826 | 661.8869944  | 642.4504081 | 726.0478949 | -0.629823706 | 2.474309346 | 2.093031  |
| <b>B7L991</b> | TY-2482_chromosome | - | 3347244 | 3348194 | 110.6663082 | 101.4795206 | 117.669679  | 201.5435514  | 204.7542885 | 207.8546946 | -0.856546849 | 5.145691567 | 4.1524704 |
| <b>B7L992</b> | TY-2482_chromosome | + | 3348312 | 3350570 | 616.1593581 | 643.7435884 | 623.2133345 | 2172.102534  | 1508.68827  | 2179.677983 | -1.652501415 | 12.96178432 | 11.88677  |
| <b>B7L989</b> | TY-2482_chromosome | - | 3350615 | 3351427 | 787.3410849 | 867.5875354 | 838.496559  | 670.4734956  | 612.3883421 | 739.1382132 | 0.299348736  | 0.898966426 | 0.7181873 |
| <b>B7L994</b> | TY-2482_chromosome | + | 3351689 | 3352447 | 3825.117312 | 3910.284604 | 4051.925822 | 11881.95208  | 11836.07856 | 13945.23317 | -1.6455153   | 4.640844032 | 4.0481969 |
| <b>B7L995</b> | TY-2482_chromosome | + | 3352591 | 3354015 | 598.2680865 | 590.0669013 | 591.533478  | 849.8731921  | 768.9365173 | 848.5121161 | -0.470529582 | 1.741511777 | 1.4489625 |
| <b>B7L996</b> | TY-2482_chromosome | + | 3354113 | 3354865 | 1821.654146 | 1806.265104 | 1992.749327 | 2849.59585   | 2586.30899  | 2860.078704 | -0.542240675 | 0.982790929 | 0.7882328 |
| <b>B7L993</b> | TY-2482_chromosome | + | 3354882 | 3355484 | 1476.284968 | 1450.118866 | 1361.898705 | 2034.568383  | 1770.867298 | 2177.114511 | -0.480569997 | 1.722263613 | 1.4321338 |
| <b>B7L998</b> | TY-2482_chromosome | + | 3355484 | 3357121 | 3072.017601 | 3363.41876  | 3149.910658 | 3707.726258  | 3934.159932 | 3945.496104 | -0.286783612 | 0.349272061 | 0.2636101 |
| <b>B7L997</b> | TY-2482_chromosome | + | 3357203 | 3357469 | 1906.833895 | 2040.130873 | 2152.511876 | 2206.677188  | 2276.085339 | 1907.94812  | -0.085442383 | 0.094373749 | 0.0691021 |
| <b>B7L9A0</b> | TY-2482_chromosome | + | 3357476 | 3357988 | 2914.366881 | 2748.950711 | 2848.896804 | 2682.059985  | 2560.84759  | 2748.258451 | 0.107846935  | 0.099351824 | 0.0731715 |
| <b>B7L9A1</b> | TY-2482_chromosome | + | 3357994 | 3358767 | 2028.902449 | 1955.449259 | 2002.473914 | 2222.351478  | 2293.352943 | 2106.449961 | -0.144577685 | 0.22319114  | 0.1652536 |

|               |                    |   |         |         |             |             |             |             |             |             |              |             |           |
|---------------|--------------------|---|---------|---------|-------------|-------------|-------------|-------------|-------------|-------------|--------------|-------------|-----------|
| <b>B5YY88</b> | TY-2482_chromosome | + | 3358800 | 3359591 | 701.5385176 | 634.5629876 | 686.6681515 | 595.6262124 | 583.3209605 | 605.1621185 | 0.209092923  | 0.438532457 | 0.3345231 |
| <b>B7L9A3</b> | TY-2482_chromosome | - | 3359594 | 3360079 | 372.431564  | 388.3401956 | 342.4424402 | 329.7593861 | 344.0553702 | 277.9376521 | 0.160073868  | 0.521809926 | 0.4015404 |
| <b>B7L9A4</b> | TY-2482_chromosome | + | 3360246 | 3361736 | 4760.733478 | 4611.198096 | 4833.612637 | 4262.071212 | 4296.338815 | 4448.048593 | 0.146665933  | 0.137225656 | 0.1007155 |
| <b>B7L999</b> | TY-2482_chromosome | + | 3361785 | 3362483 | 2349.591623 | 2531.756996 | 2498.346723 | 2393.085176 | 2392.519167 | 2381.298116 | 0.030323655  | 0.044209403 | 0.0304699 |
| <b>B7L9A6</b> | TY-2482_chromosome | - | 3362681 | 3363841 | 386.4683526 | 439.8084875 | 419.2510825 | 146.8820548 | 152.8563473 | 176.0403911 | 1.391965089  | 10.54106754 | 9.5850133 |
| <b>B7L9A7</b> | TY-2482_chromosome | - | 3363854 | 3366040 | 159.7912615 | 185.2616793 | 196.3064505 | 135.8340811 | 89.04346026 | 110.5677754 | 0.64881554   | 2.95592383  | 2.5200741 |
| <b>B7L9A5</b> | TY-2482_chromosome | + | 3366230 | 3367558 | 5109.244772 | 4719.886227 | 5290.58174  | 6797.889016 | 5559.389137 | 7076.460713 | -0.327322557 | 0.467588898 | 0.3576714 |
| <b>B7L9A8</b> | TY-2482_chromosome | + | 3367561 | 3368172 | 1582.500882 | 1453.455936 | 1514.545528 | 1671.059002 | 1269.404198 | 1516.873312 | 0.027892859  | 0.052735986 | 0.0374348 |
| <b>B7L9A9</b> | TY-2482_chromosome | + | 3368214 | 3369662 | 1218.154797 | 1254.496757 | 1274.945823 | 1200.535025 | 1082.89494  | 1236.556748 | 0.093795534  | 0.184197632 | 0.1359614 |
| <b>B7L9B1</b> | TY-2482_chromosome | + | 3369677 | 3370219 | 438.7432016 | 554.7260163 | 477.249478  | 454.1818288 | 549.7465675 | 485.5465581 | -0.064037017 | 0.033621922 | 0.022929  |
| <b>E9WNY3</b> | TY-2482_chromosome | - | 3370513 | 3370746 | 125030.0485 | 571767.0716 | 245910.4302 | 41967.46956 | 65620.97007 | 122343.8549 | 1.79541132   | 3.667151281 | 3.1545537 |
| <b>rrsD</b>   | TY-2482_chromosome | + | 3370600 | 3372141 | 865398.0898 | 3837952.774 | 1868662.283 | 203399.7662 | 240034.9005 | 767540.1276 | 2.304985785  | 4.442199896 | 3.868858  |
| <b>Q57H85</b> | TY-2482_chromosome | + | 3371721 | 3372038 | 210485.6041 | 951133.5176 | 430994.1495 | 14343.23119 | 18093.26351 | 87718.88406 | 3.649642091  | 7.553973966 | 6.7679489 |
| <b>ileT</b>   | TY-2482_chromosome | + | 3372210 | 3372286 | 531.8621529 | 629.9878617 | 321.8993391 | 140.8522597 | 425.7005969 | 110.3662824 | 0.978134641  | 2.958527284 | 2.5224179 |
| <b>alaT</b>   | TY-2482_chromosome | + | 3372329 | 3372404 | 307.0298335 | 296.806609  | 163.4424168 | 111.2412158 | 357.4513867 | 94.53508316 | 0.35130805   | 0.698463886 | 0.548724  |
| <b>rrIE</b>   | TY-2482_chromosome | + | 3372588 | 3375491 | 468228.1144 | 4821906.706 | 1295577.736 | 1083661.839 | 896636.9889 | 4771073.774 | -0.427694749 | 0.019242194 | 0.0128194 |
| <b>Q1R3T8</b> | TY-2482_chromosome | - | 3372814 | 3373116 | 86299.30757 | 712273.5604 | 230632.3062 | 297285.3109 | 244321.1453 | 1188996.816 | -1.070607303 | 0.630126298 | 0.4913952 |
| <b>C1HUN3</b> | TY-2482_chromosome | - | 3374174 | 3374377 | 28095.7086  | 341044.6551 | 90701.93173 | 80848.05984 | 67081.30132 | 386681.8987 | -0.613310078 | 0.127295367 | 0.0932622 |
| <b>C1HUN1</b> | TY-2482_chromosome | - | 3374454 | 3374906 | 89402.80596 | 1001663.439 | 244397.9064 | 70891.9202  | 42526.2337  | 478984.5705 | 0.821859105  | 0.955813038 | 0.765606  |
| <b>C1HUN0</b> | TY-2482_chromosome | - | 3374910 | 3375266 | 74664.40306 | 764792.4609 | 206375.0804 | 48152.77008 | 31237.04634 | 336674.5066 | 1.026007534  | 1.174283275 | 0.9541124 |
| <b>Q1R8D8</b> | TY-2482_chromosome | - | 3375470 | 3375761 | 4999.765564 | 23755.3084  | 2848.495552 | 17658.94832 | 144444.6772 | 15249.60614 | -3.223084996 | 3.104145618 | 2.651086  |
| <b>rrfC</b>   | TY-2482_chromosome | + | 3375585 | 3375704 | 3693.571129 | 13489.3735  | 158.1061084 | 14790.33875 | 141041.2583 | 5614.100025 | -4.061966094 | 3.073541368 | 2.6250491 |
| <b>C8UKB4</b> | TY-2482_chromosome | - | 3375810 | 3376334 | 159.3001291 | 142.8510315 | 167.190899  | 107.5381945 | 121.0754923 | 111.8871301 | 0.509144154  | 1.793498983 | 1.4914869 |
| <b>B7L9B3</b> | TY-2482_chromosome | - | 3376319 | 3376900 | 251.2240481 | 264.9395991 | 248.815134  | 139.0296147 | 116.4084977 | 139.3049193 | 0.9589501    | 5.0934244   |           |
| <b>B7L9B4</b> | TY-2482_chromosome | + | 3376970 | 3377236 | 1456.711423 | 1624.298838 | 1410.065173 | 271.3169579 | 498.1712552 | 241.482912  | 2.104643751  | 18.30665551 | 17.065611 |
| <b>B7L9B0</b> | TY-2482_chromosome | + | 3377316 | 3378299 | 1347.631182 | 1329.154555 | 1282.064745 | 755.4307301 | 1056.711512 | 856.5910509 | 0.585473488  | 2.137430322 | 1.793215  |
| <b>B7L9B6</b> | TY-2482_chromosome | + | 3378319 | 3378942 | 2554.562749 | 2609.356992 | 2621.13377  | 1831.16375  | 2745.8493   | 1835.685397 | 0.283731324  | 0.367658177 | 0.2782714 |
| <b>B7L9B7</b> | TY-2482_chromosome | + | 3379100 | 3380527 | 76.31363891 | 72.48440088 | 73.23060363 | 63.00178353 | 51.89369556 | 32.24355445 | 0.5145501    | 1.777030329 | 1.4777121 |
| <b>B7L9B8</b> | TY-2482_chromosome | - | 3380574 | 3381503 | 71.06168663 | 76.3981103  | 62.45147    | 141.7605102 | 169.3821172 | 124.0402003 | -1.110255495 | 6.066513311 | 5.3714273 |
| <b>B7L9B5</b> | TY-2482_chromosome | + | 3381867 | 3384650 | 4706.913734 | 4705.921238 | 4478.248032 | 5904.30461  | 3965.81278  | 5933.095192 | -0.199147727 | 0.205758454 | 0.1520119 |
| <b>spf</b>    | TY-2482_chromosome | + | 3384801 | 3384909 | 100.4043906 | 101.7491756 | 70.07877093 | 229.2814298 | 107.1778006 | 122.8515331 | -0.927379339 | 2.416711481 | 2.043373  |
| <b>A1AI47</b> | TY-2482_chromosome | - | 3385038 | 3385685 | 1659.381281 | 1666.949701 | 1774.151417 | 1700.393229 | 1578.004222 | 1565.690568 | 0.072146691  | 0.146691725 | 0.1071568 |
| <b>csrC</b>   | TY-2482_chromosome | + | 3385938 | 3386182 | 6834.07402  | 11040.81915 | 7472.835055 | 2588.730573 | 5431.663007 | 2334.756466 | 1.144240502  | 2.612910336 | 2.216253  |
| <b>B7L9B9</b> | TY-2482_chromosome | + | 3386249 | 3386755 | 958.1081689 | 866.0742829 | 868.0851369 | 590.3874024 | 567.8405326 | 601.1950536 | 0.628039164  | 2.70789516  | 2.3040632 |
| <b>B7L9C1</b> | TY-2482_chromosome | + | 3386947 | 3388317 | 1848.680753 | 1762.362577 | 1825.542459 | 1320.03455  | 1187.543351 | 1394.379822 | 0.498253403  | 1.763231665 | 1.466557  |
| <b>B7L9C2</b> | TY-2482_chromosome | - | 3388735 | 3390141 | 820.3455427 | 819.3370713 | 835.866659  | 1688.155534 | 1822.813862 | 2042.888699 | -1.130617954 | 7.713482954 | 6.9156717 |
| <b>B7L9C3</b> | TY-2482_chromosome | - | 3390156 | 3391202 | 596.104399  | 551.78304   | 562.4523158 | 899.306388  | 920.880769  | 1287.330238 | -0.789462869 | 4.513088717 | 3.931111  |
| <b>B7L9C4</b> | TY-2482_chromosome | - | 3391491 | 3392897 | 5677.777895 | 5028.567671 | 4888.175695 | 12906.50014 | 11835.12472 | 15367.30208 | -1.325728525 | 3.208572424 | 2.745403  |
| <b>B5BJ09</b> | TY-2482_chromosome | - | 3392879 | 3393298 | 1548.932218 | 1475.667799 | 1274.567124 | 2151.97921  | 2115.828155 | 2373.196079 | -0.633175243 | 2.00515956  | 1.6762277 |
| <b>B7L9C6</b> | TY-2482_chromosome | + | 3393270 | 3395090 | 11818.12885 | 11231.06409 | 11605.59382 | 21691.03767 | 17713.1108  | 24187.20783 | -0.847480935 | 1.480004884 | 1.2182132 |
| <b>B7L9C7</b> | TY-2482_chromosome | + | 3395310 | 3396017 | 86.76443946 | 94.2695418  | 75.62621578 | 218.6821222 | 157.3547294 | 152.9634378 | -1.149916793 | 5.99746893  | 5.3047343 |
| <b>B7L9C5</b> | TY-2482_chromosome | + | 3396028 | 3397005 | 97.78767611 | 122.1251575 | 102.1985065 | 241.789283  | 185.6293519 | 138.7985146 | -0.954943458 | 3.594416486 | 3.0897991 |
| <b>B7L9C9</b> | TY-2482_chromosome | + | 3397110 | 3398372 | 87.18574967 | 112.4872391 | 111.7602175 | 125.7350587 | 115.591231  | 93.80590969 | -0.175461497 | 0.217998    | 0.1609294 |
| <b>B7L9C8</b> | TY-2482_chromosome | - | 3398489 | 3399274 | 587.7499877 | 575.007543  | 625.3565224 | 485.4273109 | 483.2617111 | 422.5711594 | 0.359641603  | 1.16016308  | 0.9425126 |
| <b>B7L9D1</b> | TY-2482_chromosome | - | 3399317 | 3400249 | 133.7589371 | 165.3469956 | 122.4539691 | 93.42607354 | 88.27962884 | 77.87351318 | 0.590329418  | 3.022040242 | 2.5793882 |
| <b>B7L9D0</b> | TY-2482_chromosome | + | 3401286 | 3402170 | 31.60724144 | 22.09746472 | 27.01938035 | 33.81485795 | 31.73892431 | 54.54493302 | -0.440691879 | 1.287289415 | 1.0506977 |
| <b>B7L9D4</b> | TY-2482_chromosome | + | 3402206 | 3403213 | 62.1978532  | 54.67495774 | 54.66570006 | 54.9301844  | 58.21508373 | 68.15867022 | -0.035196085 | 0.112869432 | 0.0825254 |
| <b>B7L9D5</b> | TY-2482_chromosome | + | 3403286 | 3404716 | 80.41791241 | 55.67247851 | 58.48784257 | 51.13280762 | 56.45967001 | 50.11508031 | 0.347095474  | 0.715078943 | 0.562644  |
| <b>B7L9D7</b> | TY-2482_chromosome | + | 3406100 | 3407041 | 82.04169287 | 120.2736982 | 77.49078332 | 70.47297871 | 96.54589046 | 89.3800961  | 0.030665786  | 0.191395937 | 0.141217  |
| <b>D3H517</b> | TY-2482_chromosome | + | 3407164 | 3407781 | 564.3522924 | 704.518285  | 649.0291517 | 547.629975  | 558.7600767 | 565.7007777 | 0.161132669  | 0.072642642 | 0.3618093 |
| <b>B7L9D9</b> | TY-2482_chromosome | + | 3407778 | 3408647 | 703.6365418 | 797.2548368 | 671.2232888 | 533.7710728 | 525.9608079 | 610.2104025 | 0.351678649  | 1.207897115 | 0.9805582 |
| <b>B7L9D6</b> | TY-2482_chromosome | + | 3408647 | 3409081 | 463.4603382 | 547.7000081 | 509.6909425 | 610.2271213 | 552.358624  | 574.9698407 | -0.236064309 | 0.470980896 | 0.3602703 |
| <b>B7L9E1</b> | TY-2482_chromosome | + | 3409081 | 3410067 | 812.0201713 | 883.2215089 | 875.5070993 | 1229.367036 | 1120.199345 | 1332.508117 | -0.517431896 | 1.96899559  | 1.6441037 |
| <b>B7L9E2</b> | TY-2482_chromosome | - | 3410137 | 3411117 | 121.8543034 | 130.7962587 | 118.0430583 | 174.6239376 | 177.4544366 | 178.9229208 | -0.541200558 | 2.099552866 | 1.7597297 |
| <b>B7L9E0</b> | TY-2482_chromosome | + | 3411271 | 3411579 | 72.18087861 | 92.44388674 | 102.7056115 | 59.94276657 | 77.60610661 | 25.96393863 | 0.623651947  | 1.910924951 | 1.5945938 |
| <b>B7L9E4</b> | TY-2482_chromosome | + | 3411583 | 3411870 | 174.1796687 | 182.7141585 | 178.2350446 | 101.8208267 | 211.5673074 | 85.029502   | 0.406248115  | 0.989099482 | 0.7934976 |
| <b>B7L9E7</b> | TY-2482_chromosome | - | 3413472 | 3414398 | 2291.344575 | 2208.173431 | 2414.591876 | 2778.580107 | 2535.329232 | 3016.491376 | -0.235236864 | 0.353875764 | 0.2673183 |

|               |                    |   |         |         |             |             |             |             |             |             |              |             |           |
|---------------|--------------------|---|---------|---------|-------------|-------------|-------------|-------------|-------------|-------------|--------------|-------------|-----------|
| <b>B7L9E8</b> | TY-2482_chromosome | - | 3414398 | 3415030 | 2412.434757 | 2473.038016 | 2601.422823 | 1878.782318 | 1664.371578 | 2253.208554 | 0.405503413  | 0.582583436 | 0.452283  |
| <b>B7L9E9</b> | TY-2482_chromosome | - | 3415030 | 3415929 | 3638.971405 | 3457.504397 | 3779.282201 | 2299.845685 | 1707.972112 | 2845.004423 | 0.72351772   | 1.166607665 | 0.9481711 |
| <b>B7L9E5</b> | TY-2482_chromosome | - | 3415945 | 3418992 | 15496.08077 | 13503.60091 | 14902.18711 | 7427.524115 | 5167.94874  | 9807.033165 | 1.051227738  | 1.735114966 | 1.4431253 |
| <b>B7L9F1</b> | TY-2482_chromosome | + | 3419186 | 3420016 | 382.7393965 | 404.6651758 | 438.5788947 | 158.3623395 | 136.4304279 | 160.3899813 | 1.438913041  | 11.79816442 | 10.783257 |
| <b>B7L9F0</b> | TY-2482_chromosome | - | 3421265 | 3423016 | 34.32143303 | 34.01892485 | 38.4228215  | 62.73796997 | 41.72435128 | 57.77459096 | -0.598272895 | 1.720850117 | 1.4309059 |
| <b>B7L9F4</b> | TY-2482_chromosome | - | 3423013 | 3424080 | 47.95297954 | 41.93441716 | 44.1743994  | 63.55324622 | 35.30873234 | 56.41668261 | -0.214009948 | 0.365586568 | 0.2765503 |
| <b>B7L9F5</b> | TY-2482_chromosome | - | 3424073 | 3425521 | 19.41494972 | 20.46546678 | 19.08042826 | 58.98859215 | 35.34536404 | 47.3888225  | -1.315204756 | 4.876996484 | 4.2623145 |
| <b>B7L9F8</b> | TY-2482_chromosome | - | 3426618 | 3427439 | 15.07079237 | 13.1015597  | 11.70027018 | 40.35084177 | 29.02664346 | 35.52412489 | -1.413787213 | 4.945302015 | 4.3269541 |
| <b>B7L9F3</b> | TY-2482_chromosome | - | 3427684 | 3428940 | 20.85033333 | 14.9624334  | 28.19810416 | 47.10683591 | 28.98945665 | 38.18184103 | -0.751944919 | 2.223866788 | 1.8713749 |
| <b>B7L9G0</b> | TY-2482_chromosome | - | 3428940 | 3430406 | 26.25972224 | 27.53987022 | 20.1422159  | 37.86113849 | 20.76893229 | 34.0583132  | -0.398308305 | 0.542105381 | 0.4184335 |
| <b>B7L9G1</b> | TY-2482_chromosome | + | 3430694 | 3431527 | 34.54296402 | 35.16191661 | 24.67303868 | 39.01539312 | 33.65685259 | 29.21918302 | -0.205734462 | 0.153636724 | 0.1124438 |
| <b>B7L9G2</b> | TY-2482_chromosome | + | 3431514 | 3432449 | 101.52005   | 122.6026519 | 110.8830157 | 113.6706337 | 134.8380855 | 80.87004056 | -0.056238718 | 0.021505236 | 0.0145993 |
| <b>B7L9F9</b> | TY-2482_chromosome | - | 3432452 | 3433483 | 84.66162495 | 61.43435671 | 83.35809753 | 54.68168724 | 55.56820002 | 39.89174291 | 0.65143059   | 2.048558278 | 1.7139066 |
| <b>D3GRW3</b> | TY-2482_chromosome | + | 3433762 | 3434385 | 12383.58065 | 10858.1327  | 11758.77778 | 17188.93654 | 17588.52978 | 20035.25459 | -0.592683416 | 0.955718856 | 0.765606  |
| <b>C6V0W7</b> | TY-2482_chromosome | + | 3434648 | 3435628 | 88.25415476 | 96.76661433 | 76.93938131 | 70.46075718 | 56.33784981 | 67.04354538 | 0.37273638   | 1.266340168 | 1.0320394 |
| <b>D3GRW5</b> | TY-2482_chromosome | + | 3435750 | 3436451 | 747.7392054 | 826.1024368 | 755.8645962 | 565.2485011 | 629.7875436 | 602.5628845 | 0.355939823  | 1.213958199 | 0.9859763 |
| <b>B7L9G7</b> | TY-2482_chromosome | - | 3436563 | 3437933 | 2342.162299 | 2344.411286 | 2498.428442 | 2329.317646 | 2014.730897 | 2788.643686 | 0.051614922  | 0.010301408 | 0.0067663 |
| <b>B7L9G3</b> | TY-2482_chromosome | - | 3437933 | 3438628 | 1790.952775 | 1860.000588 | 1982.82276  | 2065.895187 | 1949.246514 | 2480.868103 | -0.167519614 | 0.357290374 | 0.2700027 |
| <b>B7L8D2</b> | TY-2482_chromosome | + | 3438778 | 3439275 | 1525.680673 | 1506.480208 | 1326.792913 | 528.6999998 | 852.9290316 | 627.7409856 | 1.123640036  | 6.372787559 | 5.65545   |
| <b>B7LA12</b> | TY-2482_chromosome | + | 3439427 | 3440326 | 1386.40002  | 1422.0971   | 1494.206636 | 1274.049531 | 1241.290576 | 1268.263962 | 0.191262852  | 0.442332586 | 0.3378394 |
| <b>B7LA13</b> | TY-2482_chromosome | + | 3440510 | 3441469 | 13783.33823 | 13665.32007 | 15073.98393 | 7406.820827 | 6389.423003 | 6451.921991 | 1.066708452  | 2.155105711 | 1.8087832 |
| <b>E1IU15</b> | TY-2482_chromosome | + | 3441512 | 3441728 | 1055.279752 | 1014.925618 | 957.1631597 | 704.5958884 | 781.7996774 | 658.0445906 | 0.482191436  | 2.021851739 | 1.6904777 |
| <b>B7LA14</b> | TY-2482_chromosome | + | 3441792 | 3442778 | 298.4672667 | 263.791656  | 291.1983904 | 64.83331605 | 42.64873484 | 52.68354679 | 2.408306677  | 27.29680559 | 25.860176 |
| <b>B7LA15</b> | TY-2482_chromosome | + | 3442888 | 3443640 | 279.0204231 | 280.2469146 | 241.3570608 | 124.0936422 | 115.5221536 | 132.7344633 | 1.08527005   | 7.150214236 | 6.3857383 |
| <b>B7LA16</b> | TY-2482_chromosome | - | 3443701 | 3444465 | 13142.47413 | 12763.84775 | 14003.05012 | 11927.35532 | 12385.8053  | 12325.99638 | 0.150029662  | 0.12128046  | 0.0890958 |
| <b>B7LA11</b> | TY-2482_chromosome | - | 3444576 | 3445172 | 258.5812472 | 307.8961046 | 271.9179866 | 159.1091951 | 139.1898862 | 144.7934255 | 0.85933036   | 5.165964669 | 4.5311047 |
| <b>B7LA18</b> | TY-2482_chromosome | + | 3445273 | 3445710 | 107.4004252 | 123.8820452 | 143.6435941 | 43.90111683 | 51.02774976 | 40.99511271 | 1.469363227  | 10.50142525 | 9.5462301 |
| <b>B7LA19</b> | TY-2482_chromosome | + | 3445925 | 3446221 | 474.531681  | 606.9667559 | 606.9590195 | 240.5760163 | 250.3532862 | 172.9064611 | 1.274727055  | 8.966104962 | 8.089232  |
| <b>B7LA20</b> | TY-2482_chromosome | + | 3446251 | 3446676 | 850.8633958 | 917.1352535 | 985.9208551 | 582.5204489 | 619.796409  | 525.1884692 | 0.664351325  | 3.131514464 | 2.6760173 |
| <b>B7LA17</b> | TY-2482_chromosome | - | 3446687 | 3447430 | 1842.694249 | 1726.546398 | 1858.612931 | 1422.987958 | 1452.421787 | 1556.25167  | 0.328089944  | 0.83182351  | 0.6620145 |
| <b>B7LA22</b> | TY-2482_chromosome | - | 3447530 | 3448537 | 909.4158314 | 827.799454  | 911.188906  | 1961.031041 | 1668.019833 | 2107.357833 | -1.076528832 | 7.01465753  | 6.2605679 |
| <b>B7LA23</b> | TY-2482_chromosome | - | 3448676 | 3450181 | 601.4319797 | 561.4564043 | 496.177651  | 30289.66762 | 23013.23029 | 32223.01414 | -5.694582767 | 29.47275186 | 27.983668 |
| <b>B7LA24</b> | TY-2482_chromosome | - | 3450207 | 3451049 | 292.7127212 | 228.0402529 | 238.150172  | 5266.859435 | 4571.069017 | 6247.415431 | -4.342575975 | 25.71583833 | 24.299531 |
| <b>B7LA21</b> | TY-2482_chromosome | + | 3451475 | 3451717 | 2780.283409 | 3229.164576 | 3002.058139 | 2499.654959 | 4270.310871 | 2187.272911 | -0.032439485 | 0.008098756 | 0.0052916 |
| <b>A1A1A4</b> | TY-2482_chromosome | + | 3451862 | 3452365 | 6133.076825 | 5996.505241 | 5699.658718 | 2275.85127  | 3480.321601 | 1945.137625 | 1.189625006  | 2.786080942 | 2.0501172 |
| <b>B5YZ70</b> | TY-2482_chromosome | - | 3452386 | 3453321 | 272.9718377 | 275.4382148 | 258.6781268 | 412.9729547 | 445.0443106 | 415.8153583 | -0.669070062 | 3.009545896 | 2.5689983 |
| <b>B7LA28</b> | TY-2482_chromosome | - | 3453379 | 3454707 | 2542.873361 | 2154.331804 | 2182.566526 | 4451.948512 | 4073.32533  | 4684.753487 | -0.912394858 | 2.030472917 | 1.6978727 |
| <b>B7LA29</b> | TY-2482_chromosome | - | 3454720 | 3455247 | 777.1574467 | 723.8621714 | 658.6428678 | 1529.019296 | 1315.862163 | 1468.194718 | -1.015156815 | 5.802796612 | 5.1220879 |
| <b>B7LA30</b> | TY-2482_chromosome | - | 3455343 | 3456299 | 650.6014152 | 649.2501533 | 649.6419501 | 933.3714638 | 783.4665028 | 912.9504555 | -0.437105127 | 1.573538172 | 1.3015824 |
| <b>B7LA31</b> | TY-2482_chromosome | - | 3456394 | 3457416 | 488.2001746 | 532.9187855 | 530.2144826 | 1061.317379 | 922.7028628 | 1119.389173 | -1.003887086 | 6.485132022 | 5.7628025 |
| <b>B7LA32</b> | TY-2482_chromosome | - | 3457575 | 3459770 | 313.4337835 | 286.5298855 | 293.0710293 | 428.7711314 | 411.2947539 | 465.5671616 | -0.521156185 | 2.156860078 | 1.8103263 |
| <b>B7LA33</b> | TY-2482_chromosome | + | 3459973 | 3460182 | 14235.96459 | 13229.77805 | 12995.26689 | 3796.288372 | 8668.717531 | 4059.384014 | 1.31537114   | 2.608064433 | 2.2128833 |
| <b>B7LA34</b> | TY-2482_chromosome | + | 3460345 | 3464526 | 391.9841622 | 333.6068295 | 377.6996103 | 411.550947  | 423.1505317 | 456.3961345 | -0.179525984 | 0.589261732 | 0.4576748 |
| <b>Q0H058</b> | TY-2482_chromosome | - | 3464826 | 3465615 | 101.3831919 | 66.47592961 | 76.38842247 | 78.27882953 | 59.14884169 | 37.55855815 | 0.448678841  | 1.219418863 | 0.990632  |
| <b>C8UKJ8</b> | TY-2482_chromosome | + | 3465538 | 3465828 | 63.76185331 | 52.38354997 | 53.31412663 | 35.03311523 | 30.00649967 | 27.83136976 | 0.857869594  | 3.326112209 | 2.8488958 |
| <b>B5YZ79</b> | TY-2482_chromosome | - | 3465763 | 3466367 | 144.330403  | 156.161489  | 129.7956958 | 93.96530528 | 84.58087255 | 94.66015885 | 0.611504074  | 2.954856167 | 2.5192733 |
| <b>B7LA39</b> | TY-2482_chromosome | - | 3466430 | 3466744 | 490.5050865 | 515.0043836 | 506.3863601 | 219.1649342 | 263.0978165 | 213.3573641 | 1.109366847  | 7.241920192 | 6.4724363 |
| <b>B7LA40</b> | TY-2482_chromosome | + | 3467021 | 3468178 | 285.7416879 | 270.7533031 | 265.9626952 | 512.1704422 | 455.8357613 | 594.2992156 | -0.899490284 | 4.971122595 | 4.3507943 |
| <b>B7LA41</b> | TY-2482_chromosome | + | 3468184 | 3470613 | 1005.223397 | 902.2200989 | 915.6383811 | 2177.767332 | 1848.212011 | 2309.985814 | -1.143246954 | 7.69367456  | 6.8982463 |
| <b>B7LA42</b> | TY-2482_chromosome | + | 3470965 | 3471852 | 77.0153028  | 79.58661025 | 73.8287052  | 214.1834867 | 180.095247  | 222.1571448 | -1.431574283 | 11.06346364 | 10.884454 |
| <b>B7LA43</b> | TY-2482_chromosome | + | 3472184 | 3474361 | 3566.427084 | 3547.077202 | 3565.244518 | 4651.001141 | 3909.472996 | 4953.038352 | -0.329531519 | 0.450458206 | 0.3438569 |
| <b>D3GS01</b> | TY-2482_chromosome | + | 3474425 | 3475360 | 394.9774376 | 336.1732464 | 379.6757198 | 251.4254863 | 242.9335855 | 280.0303708 | 0.576319918  | 1.991969779 | 1.6651943 |
| <b>B7LA45</b> | TY-2482_chromosome | - | 3475393 | 3476007 | 62.04144184 | 66.45106268 | 59.27826395 | 47.32587717 | 53.78640206 | 35.95238968 | 0.394006922  | 1.192840342 | 0.9680636 |
| <b>B7LA46</b> | TY-2482_chromosome | - | 3476285 | 3477385 | 2181.430798 | 2002.609104 | 2342.052679 | 508.4058855 | 433.0946831 | 519.5149827 | 2.19964634   | 22.9828467  | 21.624531 |
| <b>B7LA47</b> | TY-2482_chromosome | - | 3477399 | 3478058 | 190.1861696 | 148.392949  | 166.978149  | 147.4037506 | 108.1687105 | 139.3399378 | 0.390505324  | 1.092962983 | 0.8827871 |
| <b>B7LA48</b> | TY-2482_chromosome | - | 3478073 | 3480571 | 127.8893946 | 119.2352476 | 130.1256014 | 206.8231664 | 141.8503107 | 156.7581193 | -0.446689712 | 1.37897816  | 1.1305784 |
| <b>B7LA51</b> | TY-2482_chromosome | + | 3482345 | 3484639 | 160.359271  | 122.4247731 | 127.2081175 | 158.1280695 | 163.7962208 | 173.5597193 | -0.2227558   | 0.728866446 | 0.5739917 |

|               |                    |   |         |         |             |             |              |             |              |             |              |             |           |
|---------------|--------------------|---|---------|---------|-------------|-------------|--------------|-------------|--------------|-------------|--------------|-------------|-----------|
| <b>B7LA52</b> | TY-2482_chromosome | + | 3484608 | 3485483 | 39.77565772 | 29.83679089 | 37.00276945  | 54.1403982  | 40.86578654  | 47.3956965  | -0.379437343 | 0.944591963 | 0.7559508 |
| <b>B7LA50</b> | TY-2482_chromosome | - | 3485819 | 3486667 | 135.5222511 | 123.7913456 | 112.6360656  | 62.48985094 | 46.27718811  | 69.38850145 | 1.067983848  | 6.191309326 | 5.4866885 |
| <b>B7LA55</b> | TY-2482_chromosome | - | 3486885 | 3488615 | 1483.758149 | 1406.83682  | 1428.697075  | 2038.93684  | 2006.600759  | 2441.447099 | -0.548606261 | 2.369859894 | 2.0008696 |
| <b>B7LA56</b> | TY-2482_chromosome | - | 3488801 | 3491449 | 5302.98387  | 5100.298269 | 4956.921098  | 7761.78544  | 5942.448492  | 9801.955672 | -0.576286909 | 0.936057929 | 0.7491762 |
| <b>B7LA57</b> | TY-2482_chromosome | - | 3491804 | 3492952 | 539.2534737 | 482.7250767 | 534.848618   | 742.0793805 | 618.705348   | 859.9917519 | -0.45849613  | 1.838684475 | 1.5313283 |
| <b>B7LA58</b> | TY-2482_chromosome | + | 3493106 | 3494107 | 196.673876  | 220.0774451 | 171.3019173  | 188.8483611 | 197.4349483  | 240.3904991 | -0.114202072 | 0.17996518  | 0.1329795 |
| <b>C6V122</b> | TY-2482_chromosome | + | 3494118 | 3494891 | 172.8658396 | 159.9835816 | 152.998131   | 197.7942789 | 139.0529409  | 227.0869624 | -0.194343137 | 0.480526263 | 0.3677537 |
| <b>B7LA60</b> | TY-2482_chromosome | + | 3494955 | 3496325 | 424.1295061 | 399.4215008 | 378.1280691  | 453.0776788 | 389.3834272  | 533.7206807 | -0.173159823 | 0.447389967 | 0.3419274 |
| <b>B7LA61</b> | TY-2482_chromosome | + | 3496826 | 3498037 | 64.2028178  | 55.92906765 | 81.00636027  | 87.87694164 | 71.75054046  | 115.181039  | -0.332378606 | 1.189980892 | 0.9658424 |
| <b>B7LA59</b> | TY-2482_chromosome | + | 3498107 | 3499387 | 76.9534659  | 68.50314574 | 90.79075445  | 86.00826396 | 59.8699376   | 112.4367785 | -0.02763048  | 0.207515681 | 0.1532595 |
| <b>B7LA63</b> | TY-2482_chromosome | + | 3499641 | 3500555 | 3984.409245 | 4175.236174 | 4105.984889  | 4861.742731 | 4349.054664  | 5228.039485 | -0.233309652 | 0.282108953 | 0.2106987 |
| <b>B7LA64</b> | TY-2482_chromosome | - | 3500544 | 3501941 | 3222.386787 | 3379.131256 | 3201.390887  | 1662.872273 | 1590.748322  | 1808.674496 | 1.030066032  | 2.396955018 | 2.0249632 |
| <b>B7LA62</b> | TY-2482_chromosome | + | 3502218 | 3502919 | 1726.841415 | 1543.908364 | 1678.339207  | 1460.84573  | 2041.380687  | 1555.357216 | -0.04366074  | 0.132976254 | 0.0972348 |
| <b>B7LA66</b> | TY-2482_chromosome | + | 3502922 | 3503278 | 1269.801608 | 1221.624332 | 1331.136588  | 1600.26553  | 2028.661673  | 1422.617375 | -0.394807274 | 1.239045402 | 1.0081585 |
| <b>B7LA67</b> | TY-2482_chromosome | - | 3503324 | 3504421 | 663.3640804 | 644.1605027 | 635.7241566  | 657.9024226 | 750.8620698  | 640.8955425 | -0.078270505 | 0.155487839 | 0.1136667 |
| <b>B7LA68</b> | TY-2482_chromosome | + | 3504790 | 3506631 | 1742.294355 | 1957.127204 | 1916.704306  | 3202.911004 | 2617.180159  | 3514.986502 | -0.736953391 | 1.419258038 | 1.1659413 |
| <b>B7LA65</b> | TY-2482_chromosome | + | 3506579 | 3507433 | 1313.831165 | 1398.598512 | 1422.211873  | 1224.673844 | 1215.972128  | 1350.973146 | 0.136838453  | 0.267599173 | 0.1996707 |
| <b>E9WNY3</b> | TY-2482_chromosome | - | 3507723 | 3507956 | 125074.9183 | 573286.7644 | 245633.1262  | 42065.98479 | 65636.44282  | 121608.4428 | 1.798318543  | 3.68206871  | 3.1672973 |
| <b>rrsD</b>   | TY-2482_chromosome | + | 3507810 | 3509351 | 865398.0896 | 3837695.202 | 1870510.942  | 203058.2691 | 238961.0387  | 766553.4121 | 2.308755253  | 4.452629608 | 3.8778602 |
| <b>Q57H85</b> | TY-2482_chromosome | + | 3508931 | 3509248 | 212407.5554 | 948248.6797 | 431245.0411  | 14204.00192 | 17726.50884  | 87739.90234 | 3.659660027  | 7.56315791  | 6.7765511 |
| <b>ileT</b>   | TY-2482_chromosome | + | 3509420 | 3509496 | 493.1231735 | 520.2031793 | 280.3063263  | 107.3527763 | 360.308935   | 56.65071396 | 1.158679559  | 2.984813575 | 2.546099  |
| <b>alaT</b>   | TY-2482_chromosome | + | 3509539 | 3509614 | 331.8379488 | 277.6052407 | 180.0507847  | 110.6814236 | 338.3627658  | 74.92021943 | 0.528194178  | 1.019208184 | 0.8186514 |
| <b>rrfE</b>   | TY-2482_chromosome | + | 3509798 | 3512701 | 527232.6051 | 5590787.245 | 1484140.8043 | 1244034.275 | 1009519.78   | 5520974.199 | -0.429192422 | 0.017204285 | 0.0111677 |
| <b>Q1R3T8</b> | TY-2482_chromosome | - | 3510024 | 3510326 | 86299.30703 | 714256.9354 | 231444.3965  | 298677.5686 | 246750.9839  | 1194903.931 | -1.07493586  | 0.634235439 | 0.4947178 |
| <b>C1HUN3</b> | TY-2482_chromosome | - | 3511384 | 3511587 | 47759.38479 | 600222.5632 | 149159.0555  | 121860.5676 | 101561.3321  | 598653.7123 | -0.463095431 | 0.023218736 | 0.0155336 |
| <b>C1HUN1</b> | TY-2482_chromosome | - | 3511664 | 3512116 | 101405.621  | 1136481.658 | 280334.5013  | 81885.5086  | 47804.53145  | 556158.5129 | 0.800828845  | 0.922152983 | 0.736732  |
| <b>C1HUN0</b> | TY-2482_chromosome | - | 3512120 | 3512476 | 75283.61486 | 762963.6939 | 206830.6466  | 47935.39261 | 30772.00934  | 336385.0591 | 1.031870388  | 1.17749595  | 0.9566927 |
| <b>C5WBP6</b> | TY-2482_chromosome | - | 3512759 | 3513082 | 3567.89123  | 13651.30246 | 177.2410394  | 15960.25616 | 142124.216   | 5729.874841 | -0.085863377 | 3.117071738 | 2.6622174 |
| <b>rrfC</b>   | TY-2482_chromosome | + | 3512795 | 3512914 | 3564.152111 | 13640.98501 | 171.9623148  | 14966.99935 | 142087.8164  | 5668.040344 | -4.086432739 | 3.103039295 | 2.6505195 |
| <b>B7LA70</b> | TY-2482_chromosome | + | 3513215 | 3514240 | 525.5739833 | 531.4524391 | 626.8763778  | 845.3212931 | 756.1980975  | 816.9871439 | -0.498123144 | 2.014434936 | 1.6842837 |
| <b>B7LA71</b> | TY-2482_chromosome | + | 3514240 | 3515202 | 410.6635941 | 389.0670798 | 366.2394816  | 576.0117005 | 535.0710146  | 564.3971004 | -0.531942084 | 2.065725849 | 1.7294259 |
| <b>B7LA72</b> | TY-2482_chromosome | - | 3515237 | 3516184 | 382.3380561 | 323.0106395 | 336.6018764  | 545.5164107 | 683.5735006  | 525.2241761 | -0.727779669 | 3.532850553 | 3.0357705 |
| <b>B5Z075</b> | TY-2482_chromosome | + | 3516167 | 3516358 | 98.52408991 | 56.67791491 | 68.41253032  | 68.33068199 | 75.61201197  | 55.62739782 | 0.222286676  | 0.307614221 | 0.2304456 |
| <b>thrU</b>   | TY-2482_chromosome | + | 3516546 | 3516621 | 685.9233103 | 701.8997333 | 517.7410392  | 454.2053347 | 1054.309357  | 495.3556822 | -0.111515455 | 0.105252985 | 0.0776554 |
| <b>tyrU</b>   | TY-2482_chromosome | + | 3516630 | 3516714 | 1182.30645  | 1269.047354 | 1106.331864  | 1237.182226 | 2376.494583  | 1360.844863 | -0.498641224 | 1.378093486 | 1.1300308 |
| <b>glyT</b>   | TY-2482_chromosome | + | 3516831 | 3516905 | 1571.567261 | 1367.649861 | 1092.791474  | 1506.566984 | 2720.494475  | 1467.529768 | -0.515796662 | 1.392373688 | 1.1422847 |
| <b>thrT</b>   | TY-2482_chromosome | + | 3516912 | 3516987 | 1265.663716 | 1066.890995 | 958.9323187  | 883.8994189 | 1644.792828  | 967.4498239 | -0.066202698 | 0.144386636 | 0.1052812 |
| <b>B7LA73</b> | TY-2482_chromosome | + | 3517102 | 3518283 | 93913.71191 | 84286.69633 | 89461.80364  | 96755.51991 | 81416.75251  | 99480.03368 | -0.026871621 | 0.045015346 | 0.0309937 |
| <b>B7LA69</b> | TY-2482_chromosome | + | 3518516 | 3518896 | 2888.204091 | 2787.215625 | 2718.07474   | 3408.942676 | 3683.918329  | 3461.453164 | -0.327849676 | 0.451961527 | 0.3447972 |
| <b>B7LA75</b> | TY-2482_chromosome | + | 3518901 | 3519443 | 3211.989279 | 3104.194494 | 3138.715938  | 5304.288625 | 5767.04187   | 5150.787939 | -0.776206795 | 1.465960726 | 1.2052494 |
| <b>A1AIF6</b> | TY-2482_chromosome | - | 3519554 | 3520552 | 80026.23473 | 77112.74191 | 81948.40717  | 59396.24659 | 56367.6421   | 60995.77962 | 0.455221195  | 0.51600494  | 0.3967384 |
| <b>D6JHU1</b> | TY-2482_chromosome | - | 3520673 | 3520864 | 17191.38832 | 15633.49698 | 16789.12901  | 15397.58372 | 14713.67624  | 15783.36986 | 0.139926494  | 0.107367354 | 0.0791635 |
| <b>B7LA78</b> | TY-2482_chromosome | + | 3521154 | 3521648 | 59110.74333 | 52988.19803 | 59227.77129  | 44991.62434 | 43423.99177  | 45417.63201 | 0.390417112  | 0.399348858 | 0.3031282 |
| <b>E1PAV1</b> | TY-2482_chromosome | - | 3521706 | 3522209 | 44551.78778 | 41911.72795 | 44182.93196  | 30784.62684 | 29896.97796  | 32379.81724 | 0.514069093  | 0.617635636 | 0.4820365 |
| <b>B7LA80</b> | TY-2482_chromosome | + | 3522403 | 3526428 | 41591.11739 | 38872.21424 | 40226.10081  | 94325.9129  | 62553.11159  | 92292.72668 | -1.040100041 | 1.795738212 | 1.493183  |
| <b>B7LA76</b> | TY-2482_chromosome | + | 3526508 | 3530728 | 71812.73798 | 69959.4475  | 71001.63204  | 120929.9545 | 81027.17582  | 110507.5564 | -0.568715532 | 0.699760578 | 0.5496175 |
| <b>B7LA82</b> | TY-2482_chromosome | + | 3530944 | 3531480 | 98.77912619 | 97.65411603 | 87.59994079  | 49.05171014 | 63.81909823  | 46.32723164 | 0.81216031   | 3.758481135 | 3.2364896 |
| <b>B7LA83</b> | TY-2482_chromosome | - | 3531896 | 3533026 | 61.90302815 | 73.87987925 | 67.99057905  | 114.6046021 | 59.88603006  | 72.65255683 | -0.389371074 | 0.592849404 | 0.4607469 |
| <b>B5Z086</b> | TY-2482_chromosome | - | 3533026 | 3533838 | 58.10104571 | 37.47609051 | 35.20731284  | 62.99932856 | 50.83687984  | 77.17486615 | -0.478782645 | 1.413593067 | 1.1614683 |
| <b>B7LA86</b> | TY-2482_chromosome | - | 3533982 | 3534734 | 36.68594381 | 40.17769306 | 30.05144704  | 57.62920504 | 34.428771227 | 48.63600544 | -0.482809868 | 0.864878519 | 0.6894053 |
| <b>B7LA87</b> | TY-2482_chromosome | - | 3534730 | 3535362 | 26.19537766 | 29.79322985 | 21.48741442  | 38.0975528  | 24.38957145  | 50.65799413 | -0.569110606 | 1.116567572 | 0.9028261 |
| <b>B7LA88</b> | TY-2482_chromosome | - | 3535365 | 3537257 | 109.2652913 | 91.57173545 | 109.0425653  | 143.2599787 | 114.5477411  | 153.6547177 | -0.352053686 | 1.264448935 | 1.0303114 |
| <b>B7LA89</b> | TY-2482_chromosome | - | 3537493 | 3537966 | 289.981325  | 314.3764143 | 338.2307432  | 395.2065885 | 400.3948505  | 439.2621852 | -0.367287496 | 1.254112726 | 1.0211839 |
| <b>B7LA85</b> | TY-2482_chromosome | + | 3538061 | 3538831 | 313.9965701 | 312.3290605 | 350.1110431  | 591.0746751 | 545.9777817  | 606.4078807 | -0.810769221 | 4.491616203 | 3.9110898 |
| <b>B7LA91</b> | TY-2482_chromosome | + | 3538874 | 3539935 | 1972.837688 | 1816.810155 | 1971.511178  | 3111.633963 | 2740.087524  | 3194.175049 | -0.623523144 | 1.203214429 | 0.976357  |
| <b>B7LA92</b> | TY-2482_chromosome | + | 3539948 | 3540616 | 857.7514347 | 817.2854419 | 896.0431601  | 1280.590238 | 1149.310347  | 1407.456954 | -0.540655751 | 2.319983978 | 1.9573035 |
| <b>B7LA93</b> | TY-2482_chromosome | + | 3540662 | 3541249 | 1248.084386 | 1236.87639  | 1325.190861  | 1331.25508  | 1232.169031  | 1299.828441 | -0.010386686 | 0.034509387 | 0.0235238 |

|               |                    |   |         |         |             |             |             |              |             |             |              |             |           |
|---------------|--------------------|---|---------|---------|-------------|-------------|-------------|--------------|-------------|-------------|--------------|-------------|-----------|
| <b>B7LA94</b> | TY-2482_chromosome | + | 3541439 | 3541708 | 12425.36566 | 11504.48672 | 12640.93848 | 14463.25778  | 21613.93549 | 15078.60038 | -0.447011001 | 0.623623396 | 0.486722  |
| <b>D3GSY0</b> | TY-2482_chromosome | + | 3541718 | 3542416 | 1090.4544   | 941.4551734 | 1059.73043  | 1582.063224  | 1604.434927 | 1497.307116 | -0.56959101  | 2.458949765 | 2.0801825 |
| <b>B2TWI9</b> | TY-2482_chromosome | - | 3542424 | 3542987 | 56.37980321 | 44.50740661 | 41.28179137 | 81.66965872  | 67.28027069 | 72.42863395 | -0.644328991 | 2.15933544  | 1.8123788 |
| <b>B7LAV0</b> | TY-2482_chromosome | + | 3543084 | 3544457 | 434.2325238 | 514.6552587 | 524.3968197 | 438.0150874  | 292.8974497 | 342.2004831 | 0.397382982  | 1.440562253 | 1.1843371 |
| <b>B7LAU9</b> | TY-2482_chromosome | + | 3544457 | 3545779 | 437.8055003 | 679.3716213 | 523.421277  | 579.8135841  | 451.4050811 | 451.4469921 | 0.031323512  | 0.377701788 | 0.2865579 |
| <b>B7LAV2</b> | TY-2482_chromosome | - | 3545782 | 3547068 | 764.3688017 | 731.6563907 | 697.7077951 | 2161.350269  | 1808.160735 | 2316.530584 | -1.512933673 | 12.18872724 | 11.153664 |
| <b>B7LAV3</b> | TY-2482_chromosome | - | 3547083 | 3548669 | 662.7177277 | 595.6423708 | 598.0471661 | 2642.087145  | 2108.451002 | 2900.572848 | -2.016732664 | 20.62346778 | 19.320148 |
| <b>E9WNY3</b> | TY-2482_chromosome | - | 3549197 | 3549430 | 124992.6562 | 572333.7327 | 245732.1644 | 42431.78905  | 65374.34392 | 122049.1676 | 1.793886956  | 3.673219067 | 3.1588469 |
| <b>rrsD</b>   | TY-2482_chromosome | + | 3549284 | 3550825 | 864799.8179 | 3841816.484 | 1869124.446 | 204102.4673  | 239907.4933 | 766132.4269 | 2.305529075  | 4.446959082 | 3.8732607 |
| <b>Q57H85</b> | TY-2482_chromosome | + | 3550405 | 3550722 | 211667.1932 | 948403.2063 | 430855.5018 | 14082.50317  | 17982.23695 | 87487.31826 | 3.659264402  | 7.576523098 | 6.7875814 |
| <b>ileT</b>   | TY-2482_chromosome | + | 3550894 | 3550970 | 495.5164014 | 479.4781293 | 252.499633  | 110.5863916  | 378.4901416 | 69.74827293 | 1.01423571   | 2.46578732  | 2.0854238 |
| <b>alaT</b>   | TY-2482_chromosome | + | 3551013 | 3551088 | 318.3389183 | 284.5899089 | 165.4377714 | 131.8971617  | 357.4898486 | 59.28837141 | 0.366229916  | 0.698982495 | 0.5491082 |
| <b>rrlE</b>   | TY-2482_chromosome | + | 3551272 | 3554175 | 522102.4302 | 5520982.646 | 1460372.343 | 1196224.63   | 990135.6842 | 5339550.919 | -0.401776501 | 0.02255974  | 0.0006353 |
| <b>Q1R3T8</b> | TY-2482_chromosome | - | 3551498 | 3551800 | 86710.61963 | 712917.539  | 231252.9288 | 296996.3511  | 244703.3674 | 1187983.795 | -1.066523129 | 0.626934378 | 0.4889884 |
| <b>C1HUN3</b> | TY-2482_chromosome | - | 3552858 | 3553061 | 82417.98078 | 1047667.168 | 254941.8645 | 194501.0029  | 162234.4686 | 962513.2952 | -0.355627802 | 0.037007268 | 0.0250864 |
| <b>C1HUN1</b> | TY-2482_chromosome | - | 3553138 | 3553590 | 88654.96687 | 993729.9631 | 243684.8579 | 70964.16314  | 42468.90058 | 476537.5353 | 0.0818412074 | 0.952709237 | 0.7631856 |
| <b>C1HUN0</b> | TY-2482_chromosome | - | 3553594 | 3553950 | 75283.61448 | 766853.0956 | 206025.1505 | 47684.52209  | 30640.0518  | 335529.9058 | 1.037151339  | 1.185907453 | 0.9627245 |
| <b>Q1R8D8</b> | TY-2482_chromosome | - | 3554154 | 3554478 | 4774.633536 | 24002.19884 | 2832.648057 | 17641.87186  | 144790.4956 | 15437.73653 | -3.243137104 | 3.089446297 | 2.6390792 |
| <b>rrfC</b>   | TY-2482_chromosome | + | 3554269 | 3554388 | 3517.765228 | 13782.48418 | 182.5202429 | 14902.64029  | 141414.3775 | 5675.934396 | -4.078611042 | 3.097872931 | 2.6461617 |
| <b>B7LAV4</b> | TY-2482_chromosome | - | 3554507 | 3554947 | 52.21817911 | 56.67137516 | 58.85759952 | 39.96865335  | 42.78654209 | 40.82767471 | 0.441925869  | 1.099100906 | 0.9733651 |
| <b>B7LAV1</b> | TY-2482_chromosome | + | 3555104 | 3556030 | 42.83051809 | 32.19453676 | 36.21717379 | 102.5344684  | 108.3586766 | 83.25269425 | -1.383208816 | 8.588822647 | 7.7322507 |
| <b>B7LAV5</b> | TY-2482_chromosome | + | 3556302 | 3557900 | 120.8661949 | 81.65645921 | 86.18873931 | 78.90908596  | 74.61354491 | 71.1806577  | 0.396764555  | 1.027447341 | 0.8259836 |
| <b>B7LAV7</b> | TY-2482_chromosome | + | 3557933 | 3559234 | 193.8525682 | 139.1731953 | 197.6899885 | 136.4732176  | 91.78362762 | 110.5906994 | 0.701676984  | 2.562745263 | 2.1719776 |
| <b>B7LAV8</b> | TY-2482_chromosome | + | 3559518 | 3561251 | 84.4928399  | 87.31102698 | 81.09136716 | 70.483276106 | 50.83276126 | 70.83979462 | 0.376594547  | 1.114290136 | 0.901071  |
| <b>B7LAV9</b> | TY-2482_chromosome | - | 3563117 | 3563938 | 366.4860215 | 358.0757641 | 341.8657943 | 242.9402958  | 241.1456424 | 249.9378947 | 0.536980753  | 2.126026685 | 1.7826514 |
| <b>B7LAW1</b> | TY-2482_chromosome | + | 3564138 | 3567818 | 2164.850791 | 2466.723458 | 2251.317905 | 6544.427304  | 5192.62611  | 6772.538759 | -1.457512231 | 3.82981323  | 3.3024069 |
| <b>B7LAW2</b> | TY-2482_chromosome | + | 3568041 | 3569669 | 1065.780073 | 953.8716311 | 996.9005142 | 1120.360462  | 1049.2369   | 1174.72324  | -0.121280789 | 0.333806044 | 0.2508018 |
| <b>B7LAW3</b> | TY-2482_chromosome | - | 3569766 | 3570462 | 546.6737918 | 520.921615  | 553.3172471 | 239.4662339  | 263.0088551 | 274.8312695 | 1.098624384  | 6.63229392  | 5.8987759 |
| <b>B7LAW0</b> | TY-2482_chromosome | + | 3570664 | 3571533 | 734.2698841 | 752.4938205 | 808.9266149 | 538.1796217  | 602.4462806 | 668.0637559 | 0.390258753  | 1.058216556 | 0.8529532 |
| <b>B7LAW5</b> | TY-2482_chromosome | - | 3571540 | 3571809 | 612.4115933 | 668.9328018 | 598.6779314 | 262.2262901  | 353.1953795 | 318.344722  | 1.008761541  | 5.985230626 | 5.2929647 |
| <b>B7LAW6</b> | TY-2482_chromosome | + | 3572338 | 3573462 | 38.65195114 | 46.21931593 | 49.7356857  | 39.53237258  | 32.69589882 | 38.11463718 | 0.275333022  | 0.573112562 | 0.4440947 |
| <b>B7LAW7</b> | TY-2482_chromosome | + | 3573462 | 3574259 | 76.36318785 | 79.00247726 | 62.37193526 | 47.3523432   | 46.0456471  | 0.626980723 | 0.264681901  | 1.9962608   |           |
| <b>B7LAW4</b> | TY-2482_chromosome | - | 3574301 | 3575230 | 46.07058229 | 58.7765836  | 61.64244324 | 27.66769155  | 35.66706149 | 13.8450773  | 1.02759796   | 3.9886456   | 3.4485559 |
| <b>B7LAW9</b> | TY-2482_chromosome | - | 3575372 | 3576718 | 703.7471385 | 692.9182317 | 665.3964593 | 1147.999528  | 982.7548007 | 1232.483455 | -0.710160906 | 3.539056984 | 3.0407797 |
| <b>B7LAX0</b> | TY-2482_chromosome | + | 3577243 | 3578889 | 8978.485535 | 9026.015105 | 9531.897008 | 14317.96444  | 11956.13602 | 15875.18539 | -0.58874002  | 0.908995559 | 0.7261917 |
| <b>B7MRF8</b> | TY-2482_chromosome | - | 3579231 | 3579518 | 47.0489383  | 51.12750342 | 47.46841953 | 48.82205898  | 73.86150442 | 55.41825509 | -0.291096038 | 0.618625976 | 0.4827667 |
| <b>B7LAX4</b> | TY-2482_chromosome | + | 3580975 | 3583068 | 39.68213344 | 36.53495722 | 37.58138176 | 66.19929746  | 45.40567886 | 48.88465036 | -0.53010299  | 1.296867885 | 1.0576431 |
| <b>B7LAX3</b> | TY-2482_chromosome | + | 3583666 | 3584073 | 88.97715354 | 108.4105854 | 71.46606212 | 35.17660944  | 52.95939467 | 31.96665012 | 1.055002011  | 5.197537182 | 4.5585528 |
| <b>B7LAX8</b> | TY-2482_chromosome | - | 3584123 | 3585595 | 93.5153531  | 83.43119396 | 94.4891439  | 77.39024192  | 92.92676789 | 68.7394339  | 0.202898328  | 0.418580182 | 0.3189018 |
| <b>B7LAX9</b> | TY-2482_chromosome | - | 3585970 | 3586857 | 1328.073262 | 1347.513607 | 1436.784879 | 4648.451846  | 2778.199189 | 3571.991127 | -1.459476954 | 3.986704246 | 3.4469444 |
| <b>B7LAX7</b> | TY-2482_chromosome | - | 3586875 | 3588416 | 3383.779941 | 3801.552131 | 3833.425473 | 14504.488892 | 6500.231698 | 9299.007846 | -1.558388474 | 3.409682394 | 2.9246968 |
| <b>B7LAY1</b> | TY-2482_chromosome | - | 3588573 | 3589760 | 11346.12028 | 12136.88912 | 11701.30731 | 38868.0737   | 22035.8698  | 25525.89343 | -1.389027144 | 2.609755774 | 2.2140462 |
| <b>B7LAY2</b> | TY-2482_chromosome | + | 3590125 | 3591237 | 6780.703787 | 6617.312117 | 6327.551662 | 19590.33243  | 11546.72449 | 14632.40655 | -1.27607397  | 2.531411534 | 2.1436752 |
| <b>B7LAY3</b> | TY-2482_chromosome | + | 3591312 | 3592649 | 9063.073673 | 9017.914057 | 8689.905556 | 26250.35359  | 12819.63498 | 19931.5542  | -1.204024026 | 2.15129612  | 1.8056068 |
| <b>B7LAY4</b> | TY-2482_chromosome | + | 3592804 | 3593721 | 2772.261679 | 2702.241649 | 2679.823377 | 6138.340022  | 3308.682704 | 5927.745769 | -0.9265937   | 1.772003693 | 1.4738191 |
| <b>B7LAY7</b> | TY-2482_chromosome | + | 3595756 | 3596250 | 381.1573448 | 430.1696428 | 467.0370334 | 269.6801253  | 261.1024326 | 342.9270167 | 0.590832299  | 2.066704957 | 1.7300609 |
| <b>B7LAY8</b> | TY-2482_chromosome | + | 3596266 | 3597135 | 709.5108808 | 777.8924659 | 822.859477  | 667.7918166  | 740.8388854 | 643.5197187 | 0.16777374   | 0.404116592 | 0.3063884 |
| <b>B7LAY9</b> | TY-2482_chromosome | - | 3597296 | 3599716 | 1850.234504 | 1662.337933 | 1791.227099 | 4215.961745  | 3964.085184 | 5333.009036 | -1.284700138 | 3.652255906 | 3.1412044 |
| <b>B7LAY6</b> | TY-2482_chromosome | + | 3599887 | 3600252 | 284.3302905 | 240.7255705 | 262.0777329 | 303.332379   | 342.2551522 | 279.1785419 | -0.209527025 | 0.57988152  | 0.4498379 |
| <b>B7LAZ0</b> | TY-2482_chromosome | + | 3600365 | 3600970 | 3679.964204 | 3969.271264 | 4094.885394 | 3258.035508  | 3029.51123  | 3333.685472 | 0.288213409  | 0.371586045 | 0.2814972 |
| <b>B7LAZ2</b> | TY-2482_chromosome | + | 3600992 | 3602389 | 618.5402007 | 574.9107918 | 580.9264186 | 629.0326559  | 631.549761  | 681.3724495 | -0.107360924 | 0.28455032  | 0.2125789 |
| <b>D3GT26</b> | TY-2482_chromosome | + | 3602482 | 3602694 | 666.3082395 | 700.0449535 | 629.0207694 | 554.0227814  | 918.6673501 | 328.7028838 | 0.071288665  | 0.235211098 | 0.1745466 |
| <b>B7LAZ1</b> | TY-2482_chromosome | - | 3602742 | 3603254 | 1091.153536 | 1023.119822 | 1046.423686 | 582.4634211  | 647.1182936 | 531.7829177 | 0.843024647  | 4.820113768 | 4.2103737 |
| <b>B7LAZ7</b> | TY-2482_chromosome | + | 3604927 | 3605961 | 595.9349711 | 603.1620618 | 650.4632036 | 854.359486   | 853.6170056 | 865.6764757 | -0.461295977 | 1.794627806 | 1.4922636 |
| <b>B7LAZ8</b> | TY-2482_chromosome | + | 3605888 | 3606337 | 64.09921821 | 76.73752573 | 76.03428119 | 70.96990254  | 67.32156519 | 68.45421212 | 0.043058187  | 0.099464066 | 0.0731715 |
| <b>B7LAZ9</b> | TY-2482_chromosome | - | 3606509 | 3607489 | 1199.372547 | 1226.806716 | 1421.780265 | 1164.528512  | 1092.050497 | 1035.566852 | 0.232653391  | 0.567998555 | 0.4396206 |
| <b>B7LB00</b> | TY-2482_chromosome | + | 3607572 | 3608984 | 1127.754732 | 1105.216211 | 1097.248178 | 1743.510601  | 1677.171242 | 1932.434945 | -0.667653186 | 3.094001521 | 2.6428284 |



|               |                    |   |         |         |             |             |             |             |             |             |              |             |            |
|---------------|--------------------|---|---------|---------|-------------|-------------|-------------|-------------|-------------|-------------|--------------|-------------|------------|
| <b>B7LB01</b> | TY-2482_chromosome | + | 3609040 | 3610116 | 1231.868388 | 1029.067253 | 1127.646694 | 1424.142145 | 1508.828981 | 1770.484044 | -0.400829578 | 1.623147889 | 1.3449173  |
| <b>B7LAZ6</b> | TY-2482_chromosome | + | 3610372 | 3611562 | 1492.6797   | 1463.374221 | 1492.782004 | 1844.745734 | 1586.112697 | 2045.471911 | -0.278201917 | 0.83715188  | 0.6657926  |
| <b>Q0SXS2</b> | TY-2482_chromosome | + | 3612452 | 3613402 | 821.2246089 | 689.3768366 | 824.1154825 | 2299.135245 | 1993.039182 | 1438.635897 | -1.314415449 | 8.142712295 | 7.3074925  |
| <b>B7LB05</b> | TY-2482_chromosome | + | 3613516 | 3613929 | 770.4827747 | 645.0701007 | 675.3007696 | 1097.435694 | 1095.713078 | 1017.129928 | -0.60181889  | 2.90602204  | 2.4766141  |
| <b>B7LB06</b> | TY-2482_chromosome | + | 3613936 | 3614289 | 543.7647795 | 492.7505418 | 516.9293594 | 799.320354  | 736.1913377 | 772.2819401 | -0.557537317 | 2.97469781  | 2.0047181  |
| <b>B7LB07</b> | TY-2482_chromosome | - | 3614330 | 3617149 | 2099.932617 | 2060.903231 | 2076.406381 | 4299.008993 | 3412.551813 | 4727.952486 | -0.978700236 | 2.221182104 | 1.8691185  |
| <b>B7LB08</b> | TY-2482_chromosome | + | 3617403 | 3617936 | 1538.996684 | 1502.36333  | 1650.061679 | 2301.520634 | 2976.909297 | 2339.402192 | -0.67308509  | 2.02653438  | 1.6943433  |
| <b>D3GT41</b> | TY-2482_chromosome | - | 3618041 | 3618418 | 257.3151656 | 279.274958  | 208.840103  | 107.8297628 | 191.4210614 | 101.8782915 | 0.829899359  | 3.622295116 | 3.1143193  |
| <b>B7LB02</b> | TY-2482_chromosome | + | 3618749 | 3620332 | 181.3360692 | 224.1493306 | 262.5950627 | 157.6396283 | 164.7588794 | 141.0096268 | 0.522925476  | 1.906314416 | 1.5903774  |
| <b>B7LB11</b> | TY-2482_chromosome | - | 3620341 | 3620661 | 149.5246808 | 147.2664127 | 156.5426005 | 261.9439555 | 423.3131846 | 382.6693984 | -1.164442617 | 7.606339415 | 6.8150501  |
| <b>B7LB12</b> | TY-2482_chromosome | + | 3620747 | 3621208 | 118.10252   | 130.5161382 | 113.3834389 | 176.7471641 | 171.0884915 | 160.6609845 | -0.541762196 | 1.911711084 | 1.5951828  |
| <b>D3GT45</b> | TY-2482_chromosome | + | 3621198 | 3621461 | 65.44440758 | 64.92727448 | 31.47307555 | 45.79498916 | 36.38465112 | 28.07501083 | 0.378548496  | 1.20459346  | 0.9775756  |
| <b>ryjA</b>   | TY-2482_chromosome | - | 3621205 | 3621344 | 57.95348291 | 57.32254307 | 28.20905507 | 36.5967312  | 30.96375746 | 18.98518348 | 0.544021508  | 1.718369983 | 1.4287966  |
| <b>B6I5T1</b> | TY-2482_chromosome | - | 3621505 | 3621720 | 78.91056392 | 60.05235311 | 53.7293258  | 108.9346747 | 122.9223426 | 101.5307618 | -0.785571209 | 3.578085115 | 3.0761962  |
| <b>Q8FAZ7</b> | TY-2482_chromosome | + | 3621641 | 3621853 | 104.0963186 | 95.46879711 | 87.57091619 | 191.5777158 | 219.373254  | 198.7398133 | -1.084065996 | 7.22653029  | 6.4592793  |
| <b>B7LB13</b> | TY-2482_chromosome | + | 3621757 | 3623103 | 415.6744789 | 452.998063  | 443.0286034 | 1160.309461 | 1142.980975 | 1295.686616 | -1.452487701 | 12.82310213 | 11.7625747 |
| <b>B7LB10</b> | TY-2482_chromosome | + | 3623257 | 3624903 | 2722.172277 | 2537.884833 | 2690.47338  | 1097.664402 | 948.2290025 | 943.4652752 | 1.404460152  | 8.366675769 | 7.5195748  |
| <b>B7LB16</b> | TY-2482_chromosome | - | 3626533 | 3628179 | 222.9841488 | 194.1315379 | 205.9381716 | 53.2886906  | 39.91596007 | 58.89244626 | 2.070639216  | 20.83963327 | 19.53247   |
| <b>B7LB14</b> | TY-2482_chromosome | - | 3628693 | 3630648 | 527.0932369 | 561.5420381 | 581.1067804 | 77.39173842 | 48.08866024 | 61.88516994 | 3.114851714  | 40.18598204 | 38.461135  |
| <b>B7LB19</b> | TY-2482_chromosome | + | 3631040 | 3632521 | 3502.986807 | 3048.380498 | 3372.508716 | 59.21805398 | 29.85466388 | 42.20387838 | 6.214508948  | 107.1200434 | 104.06276  |
| <b>B7LB20</b> | TY-2482_chromosome | + | 3632569 | 3633132 | 643.0433079 | 679.8930665 | 678.7437518 | 24.44940524 | 16.26130587 | 26.07397328 | 4.899624341  | 76.68348537 | 74.346359  |
| <b>B7LB21</b> | TY-2482_chromosome | + | 3633132 | 3633800 | 379.048711  | 399.24418   | 406.7620787 | 27.34369633 | 19.04789306 | 18.65728398 | 4.128901838  | 61.56758406 | 59.464541  |
| <b>B7LB18</b> | TY-2482_chromosome | + | 3633800 | 3634753 | 200.8860071 | 246.5634902 | 246.4270446 | 26.69629272 | 14.42341744 | 22.31799748 | 3.394813189  | 43.37073473 | 41.59788   |
| <b>B7LB23</b> | TY-2482_chromosome | + | 3634836 | 3636491 | 53.81981764 | 45.38705655 | 61.01981193 | 48.17725451 | 32.62473937 | 48.45994942 | 0.371169223  | 0.681953054 | 0.5349285  |
| <b>B7LB26</b> | TY-2482_chromosome | + | 3637805 | 3639115 | 1288.381856 | 1357.676389 | 1453.998141 | 1932.095364 | 1801.851425 | 1991.747379 | -0.469968536 | 1.752544534 | 1.4581395  |
| <b>B7LB27</b> | TY-2482_chromosome | - | 3639199 | 3639885 | 406.7717103 | 424.7354012 | 404.645624  | 392.7008661 | 363.0487017 | 419.5185337 | 0.068269906  | 0.140183659 | 0.1032424  |
| <b>B7LB28</b> | TY-2482_chromosome | - | 3639982 | 3642126 | 1100.685337 | 1197.465196 | 1186.477189 | 366.0566779 | 298.4132798 | 334.1830833 | 1.774445465  | 17.79348095 | 16.567105  |
| <b>B7LB29</b> | TY-2482_chromosome | - | 3642327 | 3643790 | 29.89809306 | 30.79764758 | 28.97002497 | 51.95470989 | 6.994804083 | 34.43367483 | -0.439814388 | 0.694817922 | 0.5457491  |
| <b>B7LB24</b> | TY-2482_chromosome | - | 3643790 | 3645838 | 59.36266545 | 36.08746731 | 52.90497369 | 64.18874171 | 51.85545049 | 41.23399633 | -0.043335827 | 0.09953653  | 0.0731715  |
| <b>B7LB31</b> | TY-2482_chromosome | - | 3645841 | 3646869 | 28.76387934 | 21.15417585 | 17.42335234 | 28.97703769 | 39.34732178 | 12.62226868 | -0.332423079 | 0.316096526 | 0.2373338  |
| <b>D7XTI2</b> | TY-2482_chromosome | - | 3650105 | 3650485 | 80.10448189 | 83.97738324 | 64.31710022 | 52.65401449 | 96.74487334 | 53.09245795 | 0.129849754  | 0.288832147 | 0.2157905  |
| <b>B7LB33</b> | TY-2482_chromosome | - | 3650475 | 3651230 | 98.4452364  | 54.57848402 | 77.19844553 | 104.2593027 | 97.29200125 | 128.5456497 | -0.379680579 | 1.580146978 | 1.3067649  |
| <b>B7LB36</b> | TY-2482_chromosome | - | 3651235 | 3651666 | 53.82441323 | 43.15212526 | 62.40874475 | 63.84180505 | 85.58177901 | 91.78816337 | -0.463375542 | 1.872703037 | 1.5616623  |
| <b>B7LB37</b> | TY-2482_chromosome | - | 3651656 | 3652210 | 18.59787241 | 14.57849006 | 24.82175746 | 29.98778468 | 39.22062734 | 30.4313671  | -0.677572543 | 1.919077426 | 1.6009684  |
| <b>B7LB38</b> | TY-2482_chromosome | - | 3652213 | 3653346 | 21.59711022 | 19.21011992 | 26.68072844 | 32.90626298 | 27.22866298 | 34.08298473 | -0.41710721  | 0.936077044 | 0.7491762  |
| <b>B7LB49</b> | TY-2482_chromosome | - | 3661487 | 3661927 | 60.01986177 | 40.87882162 | 56.90473611 | 33.41543584 | 28.1135703  | 41.72658557 | 0.72739691   | 1.785077228 | 1.4838569  |
| <b>B7LB50</b> | TY-2482_chromosome | - | 3662090 | 3662569 | 593.7859092 | 597.4976193 | 571.6572752 | 49.5174355  | 68.34598935 | 59.21920228 | 3.331014922  | 45.91802482 | 44.116012  |
| <b>B7LB47</b> | TY-2482_chromosome | + | 3662824 | 3665049 | 537.6153013 | 591.6427539 | 531.3477002 | 330.9541653 | 343.107601  | 321.1198165 | 0.702317701  | 3.595134047 | 3.0902124  |
| <b>B7LB52</b> | TY-2482_chromosome | + | 3665049 | 3665924 | 306.3229977 | 392.7417519 | 360.5236826 | 291.5379577 | 295.7647844 | 293.4100942 | 0.222514419  | 0.701672102 | 0.5508562  |
| <b>B7LB53</b> | TY-2482_chromosome | + | 3666191 | 3667690 | 4612.101886 | 3882.997203 | 4199.04241  | 7224.874128 | 8842.099841 | 8990.725309 | -0.911498845 | 1.960518903 | 1.6366312  |
| <b>B7LB54</b> | TY-2482_chromosome | - | 3667873 | 3668961 | 873.4814293 | 906.1427895 | 809.9027072 | 598.3468512 | 556.9151573 | 581.5164185 | 0.544988775  | 2.421374166 | 2.0469102  |
| <b>B7LB51</b> | TY-2482_chromosome | - | 3668974 | 3669639 | 836.0984709 | 804.0867029 | 827.2624805 | 512.8128909 | 510.5120552 | 548.5117811 | 0.670733861  | 3.069177083 | 2.621219   |
| <b>B7LB56</b> | TY-2482_chromosome | - | 3669639 | 3671279 | 250.4867595 | 255.0261879 | 252.8430068 | 96.69815771 | 82.75400071 | 90.78743767 | 1.473050073  | 12.89655284 | 11.8316    |
| <b>B7LB57</b> | TY-2482_chromosome | - | 3671386 | 3672720 | 52.11243245 | 66.05680018 | 62.12821804 | 95.68023809 | 104.6618505 | 107.7889879 | -0.78970613  | 3.514338592 | 3.0187505  |
| <b>B7LB58</b> | TY-2482_chromosome | - | 3672860 | 3673663 | 104.5325251 | 134.4505935 | 102.7337802 | 214.4882193 | 288.6551771 | 199.0563418 | -1.125459982 | 5.721456686 | 5.0479864  |
| <b>B7LB59</b> | TY-2482_chromosome | - | 3673991 | 3676258 | 140.5963135 | 148.7012411 | 128.5207113 | 228.3667412 | 157.3008526 | 194.7227916 | -0.537100523 | 1.64708209  | 1.3655889  |
| <b>B7LB60</b> | TY-2482_chromosome | - | 3676457 | 3677362 | 267.6689407 | 278.061903  | 271.9836409 | 579.8671183 | 617.058871  | 538.2962698 | -1.103967667 | 6.826333322 | 6.0523875  |
| <b>B7LB55</b> | TY-2482_chromosome | + | 3677645 | 3678997 | 151.9226627 | 139.4778795 | 135.857228  | 139.4474013 | 101.7833087 | 141.841252  | 0.161610671  | 0.352773837 | 0.266648   |
| <b>B7LB62</b> | TY-2482_chromosome | + | 3679115 | 3680521 | 98.53675474 | 117.5586265 | 107.5922504 | 81.58933769 | 73.68714628 | 72.48718231 | 0.452598794  | 1.831650847 | 1.5252591  |
| <b>B7LB63</b> | TY-2482_chromosome | - | 3680666 | 3681292 | 109.1827471 | 108.3018333 | 106.9013516 | 83.53891676 | 72.75037664 | 78.94965119 | 0.451864371  | 1.701580807 | 1.4131182  |
| <b>B7LB64</b> | TY-2482_chromosome | - | 3681418 | 3683061 | 250.3552187 | 265.650764  | 294.0281406 | 229.8652397 | 148.0957731 | 303.03355   | 0.308735586  | 0.545998804 | 0.4213137  |
| <b>B7LB65</b> | TY-2482_chromosome | - | 3683142 | 3684479 | 321.6202548 | 311.7838022 | 300.2801737 | 149.9871785 | 144.7364132 | 112.2611331 | 1.153062237  | 8.090302735 | 7.259617   |
| <b>B7LB66</b> | TY-2482_chromosome | - | 3685053 | 3685769 | 598.8873102 | 638.7867938 | 657.6853748 | 587.7805077 | 595.1863607 | 556.6380984 | 0.114147237  | 0.268008521 | 0.1999502  |
| <b>B7LB67</b> | TY-2482_chromosome | - | 3685769 | 3687397 | 831.4977955 | 842.7350026 | 913.9109062 | 806.4771769 | 813.5962778 | 765.8137346 | 0.123842926  | 0.628750658 | 0.1996707  |
| <b>B7LB61</b> | TY-2482_chromosome | + | 3687578 | 3687805 | 205.9855024 | 328.7646765 | 240.7809732 | 186.2091375 | 169.2866196 | 134.6428162 | 0.492901155  | 2.442841626 | 2.0661181  |
| <b>Q1R3D4</b> | TY-2482_chromosome | - | 3687852 | 3688244 | 309.1410771 | 419.2102468 | 459.3058716 | 326.240975  | 284.8631824 | 215.0159468 | 0.449689115  | 1.693977728 | 1.406623   |
| <b>B7LBS9</b> | TY-2482_chromosome | + | 3688319 | 3688612 | 251.8247991 | 297.8869456 | 277.9557446 | 11.18716506 | 14.66891002 | 5.698606014 | 4.614237825  | 67.08558141 | 64.873394  |

|        |                    |   |         |         |             |             |             |              |              |             |              |             |           |
|--------|--------------------|---|---------|---------|-------------|-------------|-------------|--------------|--------------|-------------|--------------|-------------|-----------|
| B7LBT1 | TY-2482_chromosome | - | 3688938 | 3690452 | 3649.524721 | 3346.724684 | 3515.071314 | 10255.93769  | 10004.13957  | 11804.74591 | -1.567437495 | 4.403741147 | 3.8339474 |
| B7LBT2 | TY-2482_chromosome | - | 3690692 | 3692146 | 92.02290004 | 97.05013518 | 79.59517178 | 71.73000843  | 58.15575302  | 70.94036016 | 0.374352169  | 1.257231164 | 1.0234197 |
| B7LBT3 | TY-2482_chromosome | - | 3692208 | 3694352 | 86.07923782 | 89.29314929 | 70.95831904 | 67.79807852  | 66.46029803  | 54.25380085 | 0.311066952  | 1.032230543 | 0.8300095 |
| B7LBT5 | TY-2482_chromosome | - | 3696135 | 3697670 | 124.7775768 | 140.9065085 | 127.9993447 | 100.0868313  | 104.7600944  | 63.79795235 | 0.462631057  | 1.904130025 | 1.5885867 |
| B7LBT7 | TY-2482_chromosome | - | 3698422 | 3699261 | 148.133461  | 158.4702943 | 121.7407716 | 49.59206331  | 72.97519503  | 47.71012856 | 1.273294721  | 8.889614482 | 8.0163101 |
| B7LBT9 | TY-2482_chromosome | - | 3699566 | 3700051 | 34.28636351 | 36.27333262 | 39.06891333 | 33.28180784  | 50.25625773  | 25.53476502 | -0.009227455 | 0           | 0         |
| B7LBT6 | TY-2482_chromosome | - | 3701732 | 3702583 | 168.2283347 | 167.6892582 | 172.3394727 | 90.92556429  | 106.4810314  | 116.8369378 | 0.736749156  | 3.415733831 | 2.9292829 |
| B7LFP9 | TY-2482_chromosome | + | 3702958 | 3703528 | 632.5599995 | 654.512912  | 694.6894261 | 746.73173    | 677.0147972  | 769.5184665 | -0.134759939 | 0.33219558  | 0.2496518 |
| Q9S110 | TY-2482_chromosome | - | 3703461 | 3703829 | 509.1090537 | 553.7823864 | 579.8297701 | 680.4865249  | 578.7047932  | 685.3067117 | -0.244148671 | 0.629082849 | 0.4904827 |
| P71290 | TY-2482_chromosome | - | 3703747 | 3704052 | 287.8376729 | 293.8810845 | 307.084077  | 386.2608371  | 326.6163291  | 394.5281898 | -0.309565552 | 0.9219982   | 0.7367231 |
| B7LBU5 | TY-2482_chromosome | + | 3704123 | 3705643 | 1408.224838 | 1258.196124 | 1434.807583 | 2348.436247  | 2195.900002  | 2469.280222 | -0.729916354 | 2.719460906 | 2.3144216 |
| Q327G0 | TY-2482_chromosome | + | 3705721 | 3706218 | 209.1830595 | 192.7401788 | 288.551813  | 349.5985     | 282.018025   | 334.0936612 | -0.410492449 | 1.614339207 | 1.3377308 |
| B7LBY5 | TY-2482_chromosome | + | 3706374 | 3710489 | 6318.391552 | 6750.929137 | 6594.415466 | 7099.779784  | 5576.616874  | 9016.545685 | -0.114447333 | 0.145653411 | 0.1063131 |
| B3IA48 | TY-2482_chromosome | - | 3710589 | 3710897 | 222.8717172 | 211.7574605 | 221.8472024 | 189.2407343  | 243.9151548  | 271.9440929 | -0.03188212  | 0.196674926 | 0.145213  |
| Q5K5W0 | TY-2482_chromosome | - | 3710927 | 3711566 | 92.59746468 | 114.2486481 | 90.8874593  | 80.98075376  | 101.0318833  | 111.5171439 | 0.001885403  | 0.008445143 | 0.0054068 |
| B7LBW1 | TY-2482_chromosome | + | 3711654 | 3712775 | 274.393316  | 271.0059715 | 294.5824218 | 320.5498037  | 290.2516937  | 319.6409541 | -0.132069479 | 0.328567985 | 0.2469439 |
| D7JSS3 | TY-2482_chromosome | - | 3713556 | 3714080 | 92.17117135 | 87.17074601 | 70.24674364 | 56.59397431  | 60.13354828  | 42.52113271 | 0.581887951  | 2.25049542  | 1.8939135 |
| Q327G0 | TY-2482_chromosome | + | 3714068 | 3714463 | 55.50904549 | 42.65844722 | 50.16231352 | 62.94453366  | 63.68428653  | 68.32612345 | -0.330988901 | 0.993820565 | 0.7974715 |
| B7LBV5 | TY-2482_chromosome | - | 3714497 | 3715636 | 356.7488274 | 347.8878618 | 340.5895653 | 176.1206791  | 164.7010486  | 160.6287725 | 1.043592429  | 6.905619538 | 6.1558299 |
| B7LBX6 | TY-2482_chromosome | + | 3715685 | 3715882 | 82.8263812  | 117.8246874 | 75.48459958 | 36.07503101  | 32.70154939  | 40.59687868 | 1.222015859  | 6.726949099 | 5.9882485 |
| B7LBV3 | TY-2482_chromosome | - | 3715875 | 3716069 | 93.60486452 | 92.19849889 | 75.58153542 | 27.86866598  | 38.28620246  | 35.45825758 | 1.360882533  | 7.819674637 | 7.014635  |
| B7LBU8 | TY-2482_chromosome | + | 3716376 | 3717299 | 84.39302895 | 106.1439937 | 78.24690721 | 36.09986194  | 32.86225097  | 10.07011751 | 1.557334177  | 8.783799929 | 7.916846  |
| B7LBV1 | TY-2482_chromosome | - | 3717255 | 3718445 | 244.0676505 | 206.6271565 | 191.1499204 | 73.44312319  | 89.29294248  | 64.80697852 | 1.486940756  | 11.84363425 | 10.825763 |
| B7LBV0 | TY-2482_chromosome | + | 3718518 | 3720362 | 780.9428543 | 680.6866532 | 666.6348924 | 189.0290643  | 168.25655336 | 227.1964872 | 1.904576767  | 17.47027008 | 16.251834 |
| B7LBU9 | TY-2482_chromosome | + | 3720306 | 3721250 | 495.8851375 | 449.0625079 | 482.642693  | 141.2022242  | 117.2813301  | 160.1617958 | 1.811678625  | 15.84980165 | 14.676177 |
| B7LBU4 | TY-2482_chromosome | + | 3721253 | 3722992 | 872.8190069 | 819.4145812 | 798.0838057 | 292.7450932  | 252.8609915  | 374.3807981 | 1.478309788  | 10.27991573 | 9.3407294 |
| B7LBU7 | TY-2482_chromosome | + | 3722992 | 3724326 | 1983.349872 | 2041.691468 | 1662.749665 | 659.1268846  | 762.6766197  | 699.9611155 | 1.390584492  | 10.7667789  | 9.8029149 |
| B7LBU6 | TY-2482_chromosome | + | 3724251 | 3726527 | 2089.52483  | 2216.508982 | 1734.010835 | 1099.23765   | 1086.561247  | 1219.397142 | 0.78880333   | 4.227475295 | 3.6702202 |
| Q327G0 | TY-2482_chromosome | - | 3726923 | 3727420 | 135.4232287 | 105.2752583 | 146.2246611 | 178.4937087  | 185.6425708  | 193.3193893 | -0.433258498 | 1.970683203 | 1.6455902 |
| B7LB68 | TY-2482_chromosome | - | 3727498 | 3729018 | 1413.439325 | 1268.554523 | 1471.820881 | 2330.093406  | 2058.453105  | 2466.58403  | -0.675216828 | 2.526937996 | 2.139434  |
| P71290 | TY-2482_chromosome | + | 3729089 | 3729394 | 368.7789647 | 313.1297556 | 365.8734862 | 505.1605928  | 388.4474372  | 540.390063  | -0.39853656  | 1.465292262 | 1.2047544 |
| Q9S110 | TY-2482_chromosome | + | 3729312 | 3729680 | 541.2423473 | 552.1790771 | 673.1721643 | 783.7422812  | 603.2420822  | 751.0965609 | -0.248781629 | 0.7306334   | 0.5754867 |
| B7LFP9 | TY-2482_chromosome | - | 3729613 | 3730183 | 598.8164137 | 631.6770115 | 733.8482791 | 760.696687   | 591.4064234  | 761.547197  | -0.084442931 | 0.213747085 | 0.1583033 |
| C8UCIO | TY-2482_chromosome | - | 3730444 | 3730692 | 197.7052947 | 179.9395788 | 141.4461866 | 196.3830621  | 219.416391   | 162.2341485 | -0.210395325 | 0.338357927 | 0.2546619 |
| B7LBY1 | TY-2482_chromosome | - | 3730692 | 3731114 | 260.3490914 | 264.4873999 | 214.1966828 | 177.11764555 | 206.6615024  | 169.9373712 | 0.371480566  | 1.351327281 | 1.1066208 |
| B7LBY2 | TY-2482_chromosome | - | 3731345 | 3732256 | 49.98041573 | 60.62872301 | 50.69943273 | 40.63669946  | 44.62522491  | 39.58821517 | 0.313975335  | 0.814319789 | 0.6478336 |
| B7LBY3 | TY-2482_chromosome | - | 3732346 | 3733023 | 130.155704  | 135.8187424 | 115.2783428 | 41.94047262  | 50.1382457   | 37.12497426 | 1.511473381  | 11.92995845 | 10.909102 |
| B7LBX6 | TY-2482_chromosome | + | 3733358 | 3734818 | 172.7795003 | 165.2298351 | 167.6559214 | 142.0005199  | 117.3073586  | 140.6632184 | 0.342031517  | 1.064375089 | 0.8583373 |
| B7LBY5 | TY-2482_chromosome | - | 3735644 | 3739498 | 15035.95136 | 16499.98966 | 15230.86181 | 18082.3889   | 8460.815426  | 3967.797279 | 0.847488323  | 1.700762721 | 1.4124849 |
| C1J8M7 | TY-2482_chromosome | - | 3739862 | 3740863 | 58.46936423 | 47.53915015 | 53.44904803 | 28.22882359  | 57.55745028  | 38.31158001 | 0.441149419  | 0.76801144  | 0.6086839 |
| B7LBV5 | TY-2482_chromosome | - | 3741267 | 3741629 | 68.79561956 | 69.49599689 | 66.59931459 | 22.04235327  | 24.54221631  | 31.25100955 | 1.43096493   | 7.582547629 | 7.9932022 |
| E3Y4T4 | TY-2482_chromosome | - | 3741563 | 3741827 | 55.23098311 | 68.00988707 | 53.25447218 | 14.7963252   | 19.12654268  | 20.86708917 | 1.658435473  | 8.864838422 | 7.9936612 |
| B7LBY9 | TY-2482_chromosome | - | 3741972 | 3745485 | 1643.584702 | 1930.666939 | 1711.217074 | 1245.972817  | 1184.889106  | 1080.352561 | 0.524382705  | 2.386632013 | 2.1053119 |
| B7LBZ1 | TY-2482_chromosome | + | 3745574 | 3745834 | 77.72375594 | 97.97242426 | 64.22816371 | 20.8649431   | 26.46538527  | 19.92608535 | 1.723306719  | 11.05138889 | 10.07599  |
| B7LBZ2 | TY-2482_chromosome | - | 3745941 | 3747200 | 227.3631915 | 214.3985169 | 226.4767675 | 152.8468028  | 175.6966944  | 155.3595847 | 0.48581637   | 1.694066961 | 1.406623  |
| B7LBZ3 | TY-2482_chromosome | - | 3747267 | 3747512 | 105.3715382 | 96.6358855  | 121.7809197 | 78.50052073  | 97.43647861  | 89.46089314 | 0.356721365  | 0.84401346  | 0.6716647 |
| pheU   | TY-2482_chromosome | - | 3747398 | 3747473 | 34.56736621 | 26.83504486 | 29.61891997 | 36.72516982  | 35.46039854  | 39.38446632 | -0.245306314 | 0.519708363 | 0.400066  |
| D3GV37 | TY-2482_chromosome | - | 3747583 | 3748179 | 715.6924245 | 612.3139552 | 785.9890229 | 900.1940814  | 967.3928911  | 977.4447001 | -0.352528602 | 1.529382991 | 1.2603937 |
| B7LBZ0 | TY-2482_chromosome | - | 3748195 | 3749889 | 579.7151703 | 503.2922779 | 534.7360989 | 967.2353465  | 863.5292561  | 1166.51062  | -0.832710941 | 5.019086577 | 4.3943694 |
| B7LBZ6 | TY-2482_chromosome | - | 3749868 | 3750203 | 193.8269888 | 168.336818  | 176.8682858 | 181.6166447  | 185.5870122  | 237.6855544 | -0.099474162 | 0.358849465 | 0.2709797 |
| B7LBZ7 | TY-2482_chromosome | - | 3750322 | 3751620 | 5965.020912 | 4751.339742 | 5198.601401 | 14329.41659  | 10488.19627  | 13800.62526 | -1.247058408 | 2.871981549 | 2.4458859 |
| Q8FAM6 | TY-2482_chromosome | + | 3751720 | 3753168 | 46376.42447 | 46475.77519 | 48821.13949 | 84521.32755  | 61515.76232  | 58426.86493 | -0.582602099 | 0.663181633 | 0.5189147 |
| B7LBZ5 | TY-2482_chromosome | + | 3753511 | 3753984 | 217.3602173 | 281.653501  | 242.8961119 | 336.0325992  | 428.7766737  | 312.1614483 | -0.603948501 | 1.919634246 | 1.6011929 |
| B7LC00 | TY-2482_chromosome | - | 3754006 | 3755292 | 192.1062985 | 193.634284  | 210.0850214 | 177.792346   | 176.0923118  | 163.4841998 | 0.084055391  | 0.145484779 | 0.1060669 |
| A1AJ50 | TY-2482_chromosome | - | 3755405 | 3755725 | 2578.525811 | 2627.216439 | 2536.543619 | 5245.164188  | 4000.507235  | 3990.544354 | -0.829675776 | 1.471050023 | 1.2099917 |
| B7LC02 | TY-2482_chromosome | + | 3755872 | 3757515 | 19448.29105 | 18917.21554 | 19655.87218 | 42954.3729   | 29239.80628  | 35871.59223 | -0.921726291 | 1.490851811 | 1.2280542 |
| B7LBZ9 | TY-2482_chromosome | + | 3757656 | 3758006 | 1167.869929 | 1336.717736 | 1429.648652 | 1361.972681  | 1433.351293  | 1357.793088 | -0.078987809 | 0.151794015 | 0.1108103 |

|               |                    |   |         |         |             |             |             |             |              |             |              |             |           |
|---------------|--------------------|---|---------|---------|-------------|-------------|-------------|-------------|--------------|-------------|--------------|-------------|-----------|
| <b>B7LC04</b> | TY-2482_chromosome | - | 3758215 | 3759081 | 144.8914362 | 164.5289129 | 166.4886558 | 132.8957208 | 133.8446577  | 95.23664928 | 0.338214317  | 1.247498592 | 1.0158013 |
| <b>B7LC05</b> | TY-2482_chromosome | - | 3759474 | 3760499 | 521.8819799 | 578.8539086 | 534.0459902 | 746.0066986 | 789.0504881  | 706.6565837 | -0.490610665 | 1.648846661 | 1.3669894 |
| <b>B7LC03</b> | TY-2482_chromosome | + | 3760541 | 3761104 | 5282.015685 | 5072.155314 | 5138.564739 | 5233.665055 | 7415.268499  | 5627.118154 | -0.216743644 | 0.274542444 | 0.205258  |
| <b>A7ZV20</b> | TY-2482_chromosome | - | 3761382 | 3761630 | 2666.270514 | 2813.097413 | 1727.684838 | 604.1872172 | 2426.193288  | 514.4375769 | 0.93314102   | 2.209738531 | 1.8589573 |
| <b>B7LC09</b> | TY-2482_chromosome | + | 3761716 | 3762030 | 488.2923559 | 547.346059  | 448.6707541 | 275.3982683 | 354.9920121  | 334.0887812 | 0.600644424  | 2.511356736 | 2.1261689 |
| <b>B7LC10</b> | TY-2482_chromosome | - | 3762033 | 3762563 | 1112.02804  | 1084.803561 | 1119.767461 | 529.6628551 | 591.530101   | 644.4192436 | 0.94997502   | 5.620381625 | 4.9566712 |
| <b>B7LC06</b> | TY-2482_chromosome | - | 3762655 | 3763785 | 211.4329122 | 249.0967204 | 238.3854956 | 215.3365667 | 212.9258889  | 227.5230146 | 0.073424579  | 0.17636106  | 0.1300111 |
| <b>B7LC12</b> | TY-2482_chromosome | - | 3763839 | 3764195 | 1767.742971 | 1916.262545 | 1951.080496 | 1513.337218 | 1330.455437  | 1322.348579 | 0.407441294  | 1.48721028  | 1.2245869 |
| <b>B7LC13</b> | TY-2482_chromosome | - | 3764209 | 3764601 | 2415.408466 | 2547.464393 | 2597.426598 | 1848.800489 | 1523.315598  | 1916.635851 | 0.517113045  | 1.086564557 | 0.8778026 |
| <b>B7LC11</b> | TY-2482_chromosome | - | 3764615 | 3765346 | 5945.272034 | 5914.438431 | 6194.382207 | 3375.855803 | 2507.958407  | 3294.112965 | 0.978032365  | 2.03954335  | 1.7061237 |
| <b>B7LC15</b> | TY-2482_chromosome | - | 3765342 | 3767147 | 19635.93603 | 19218.88238 | 21435.3564  | 9524.992774 | 6533.104169  | 8333.062001 | 1.301943838  | 2.815455858 | 2.39616   |
| <b>B7LC16</b> | TY-2482_chromosome | + | 3767472 | 3768446 | 297.1256538 | 238.3612397 | 258.7157115 | 517.6887677 | 486.8777393  | 440.9799215 | -0.850331518 | 4.508376173 | 3.9271247 |
| <b>B7LC17</b> | TY-2482_chromosome | + | 3768668 | 3770167 | 113.1387427 | 102.9368834 | 86.7752849  | 74.41696347 | 84.5896747   | 111.2879839 | 0.207117243  | 0.353452826 | 0.267211  |
| <b>B7LC14</b> | TY-2482_chromosome | + | 3770222 | 3770533 | 46.48895465 | 39.43959526 | 41.50803427 | 23.91637725 | 34.66374801  | 30.24349076 | 0.575058102  | 1.323717823 | 1.0825077 |
| <b>B7LC19</b> | TY-2482_chromosome | + | 3770533 | 3770844 | 81.08992893 | 58.2485771  | 63.86298435 | 68.0138105  | 86.53747849  | 73.76765904 | -0.105974676 | 0.298209378 | 0.223195  |
| <b>B7LC20</b> | TY-2482_chromosome | + | 3770879 | 3774199 | 1050.933886 | 856.5663754 | 932.8391277 | 1531.134918 | 1776.6348848 | 1854.827894 | -0.792323158 | 4.41116532  | 3.8403102 |
| <b>B7LC21</b> | TY-2482_chromosome | - | 3774224 | 3775189 | 970.1556239 | 832.8109576 | 831.713779  | 2321.22225  | 2165.79804   | 3197.580208 | -1.473217541 | 11.70836774 | 10.698357 |
| <b>B7LC22</b> | TY-2482_chromosome | - | 3775289 | 3776338 | 1297.518963 | 1292.99476  | 1233.195872 | 1822.226743 | 1851.007255  | 2104.752649 | -0.58096839  | 2.512405005 | 2.126755  |
| <b>B7LC23</b> | TY-2482_chromosome | + | 3776433 | 3776975 | 694.6130243 | 756.9600168 | 744.1056986 | 682.7752615 | 726.2087431  | 783.9353199 | 0.01105059   | 0.00188364  | 0.0003585 |
| <b>glyY</b>   | TY-2482_chromosome | + | 3777189 | 3777264 | 1169.020321 | 1125.267398 | 962.9305389 | 659.2016436 | 1475.696622  | 609.9954035 | 0.224918083  | 0.456628784 | 0.3487331 |
| <b>A1AJ71</b> | TY-2482_chromosome | - | 3777203 | 3777469 | 1278.224329 | 1220.571512 | 1034.2111   | 739.3375097 | 1637.684294  | 674.4705067 | 0.187028179  | 0.364029247 | 0.2752266 |
| <b>glyY</b>   | TY-2482_chromosome | + | 3777301 | 3777376 | 691.4446675 | 564.407331  | 459.6094722 | 415.6909333 | 881.4413809  | 324.6411952 | 0.055453649  | 0.110002051 | 0.0806773 |
| <b>B7LC18</b> | TY-2482_chromosome | - | 3777649 | 3778785 | 1003.58622  | 946.1754787 | 1049.891533 | 473.9945261 | 532.4276099  | 484.240099  | 1.039474908  | 6.493162338 | 5.7703304 |
| <b>B7LC25</b> | TY-2482_chromosome | + | 3778784 | 3780328 | 743.4421242 | 645.2346946 | 731.6126178 | 696.615325  | 663.348897   | 837.6776523 | 0.016432389  | 0.093388547 | 0.0683186 |
| <b>B7LC27</b> | TY-2482_chromosome | + | 3780303 | 3780761 | 263.0167737 | 298.6262501 | 313.7990905 | 342.5460556 | 340.2856541  | 438.9707459 | -0.321533708 | 1.051778209 | 0.8469726 |
| <b>B7LC28</b> | TY-2482_chromosome | + | 3780783 | 3782117 | 1123.249916 | 1128.175025 | 1092.60274  | 1080.175514 | 1098.408435  | 1187.866059 | -0.001100906 | 0.015912396 | 0.0103579 |
| <b>B7LC24</b> | TY-2482_chromosome | + | 3782130 | 3783974 | 2230.846542 | 2089.605596 | 2182.067371 | 2259.012873 | 2263.267184  | 2479.787685 | -0.076353416 | 0.125106775 | 0.0921015 |
| <b>B7LC30</b> | TY-2482_chromosome | + | 3783970 | 3784917 | 7322.881164 | 6842.026782 | 7191.940264 | 7033.260562 | 9036.038306  | 6932.260323 | -0.088810219 | 0.107268397 | 0.0791635 |
| <b>B7LC31</b> | TY-2482_chromosome | + | 3785006 | 3785311 | 5758.328572 | 5644.075862 | 5953.395726 | 6197.865007 | 8634.772275  | 5749.695518 | -0.239362481 | 0.280368975 | 0.209295  |
| <b>B7LC32</b> | TY-2482_chromosome | + | 3785391 | 3786668 | 5103.975176 | 5128.542091 | 5111.508048 | 6895.767154 | 5866.107774  | 6792.42931  | -0.355380539 | 0.448841384 | 0.3428933 |
| <b>B7LC29</b> | TY-2482_chromosome | + | 3786757 | 3788013 | 6830.171658 | 5920.213619 | 6210.089095 | 17732.97901 | 14484.25355  | 19308.95638 | -1.405065292 | 3.410239287 | 2.9249535 |
| <b>B7LC34</b> | TY-2482_chromosome | + | 3788019 | 3789020 | 5096.046846 | 4004.443419 | 4416.884227 | 13023.56887 | 11887.0343   | 13291.56172 | -1.451937257 | 3.81213824  | 3.2853725 |
| <b>B7LC35</b> | TY-2482_chromosome | + | 3789105 | 3789299 | 66.63854682 | 66.54733411 | 56.51307142 | 126.9066707 | 122.874313   | 105.5325001 | -0.958801172 | 4.934101128 | 4.3169371 |
| <b>B7LC36</b> | TY-2482_chromosome | + | 3789406 | 3790701 | 11169.87083 | 9431.426203 | 10540.00646 | 17188.0537  | 14882.9279   | 15500.66224 | -0.590296187 | 0.895287348 | 0.715517  |
| <b>B7LC37</b> | TY-2482_chromosome | + | 3790909 | 3791331 | 876.0284788 | 1321.227641 | 1090.66827  | 1128.976673 | 1007.358814  | 1147.11113  | -0.086034993 | 0.00079285  | 0         |
| <b>B7LC38</b> | TY-2482_chromosome | + | 3791373 | 3793811 | 6810.427405 | 7248.402789 | 7573.015598 | 12445.83988 | 8959.285344  | 13008.44906 | -0.664057717 | 1.044475613 | 0.8405839 |
| <b>B7LC33</b> | TY-2482_chromosome | + | 3793994 | 3794722 | 896.6707911 | 840.491617  | 911.8509074 | 2374.107541 | 2148.567915  | 2431.147939 | -1.367077141 | 11.05310403 | 10.076805 |
| <b>B7LC47</b> | TY-2482_chromosome | + | 3798994 | 3800616 | 348.1658764 | 419.6480518 | 459.1933133 | 195.678555  | 162.7745799  | 228.5075457 | 1.085594622  | 6.020513238 | 5.3263693 |
| <b>B5Z2J4</b> | TY-2482_chromosome | - | 3800739 | 3801023 | 302.1415131 | 303.7926702 | 285.7465582 | 1162.486064 | 1135.747018  | 1064.494406 | -1.94064782  | 19.54504403 | 18.269514 |
| <b>B7LC49</b> | TY-2482_chromosome | - | 3801163 | 3801489 | 949.8627933 | 860.9913628 | 880.009153  | 2168.403628 | 2693.004143  | 1814.746772 | -1.317437262 | 9.019750995 | 8.1421607 |
| <b>B7LC50</b> | TY-2482_chromosome | + | 3801671 | 3802417 | 304.9755829 | 339.5222239 | 328.1449785 | 315.3660287 | 286.6302748  | 292.1447988 | 0.089794513  | 0.256050166 | 0.1904335 |
| <b>B7LC45</b> | TY-2482_chromosome | - | 3802420 | 3803172 | 346.9148794 | 358.1447941 | 367.1402452 | 317.583792  | 272.9948783  | 242.4216748 | 0.322936525  | 1.112793489 | 0.899985  |
| <b>B7LC52</b> | TY-2482_chromosome | - | 3803283 | 3804344 | 64.73431087 | 109.0953799 | 65.60585672 | 89.47318753 | 87.38923696  | 72.66654264 | -0.251193583 | 0.11902164  | 0.087349  |
| <b>B7LC53</b> | TY-2482_chromosome | + | 3804699 | 3806093 | 36.61713322 | 46.72151626 | 29.2776174  | 36.37762097 | 26.29733224  | 32.86521262 | 0.113459206  | 0.327071281 | 0.2461356 |
| <b>B7LC51</b> | TY-2482_chromosome | + | 3806427 | 3806888 | 28.33435372 | 26.6586042  | 33.21905717 | 30.32556984 | 24.53264395  | 20.11818857 | 0.152466521  | 0.263543819 | 0.1962639 |
| <b>A7ZV67</b> | TY-2482_chromosome | - | 3806914 | 3807579 | 62.28136208 | 41.05247693 | 58.90103057 | 73.44538343 | 56.33450363  | 68.3302294  | -0.179067641 | 0.519746385 | 0.400066  |
| <b>B7LCQ7</b> | TY-2482_chromosome | + | 3807565 | 3808416 | 64.26949383 | 51.13771258 | 77.69079045 | 72.00835886 | 73.08600865  | 73.25343658 | 0.169437347  | 0.126547652 | 0.0928189 |
| <b>B7LCQ8</b> | TY-2482_chromosome | + | 3808419 | 3809102 | 65.53814437 | 84.07175741 | 80.65900294 | 51.97922461 | 44.53010831  | 51.25481215 | 0.602075917  | 2.233209394 | 1.8790001 |
| <b>B7LCQ9</b> | TY-2482_chromosome | + | 3809250 | 3809798 | 29.15380137 | 30.62383878 | 27.61342069 | 4.398600548 | 30.46033883  | 9.614896099 | 0.102052351  | 2.002796943 | 1.6742174 |
| <b>B7LCQ6</b> | TY-2482_chromosome | + | 3810478 | 3810870 | 18396.41056 | 14070.83821 | 15464.55279 | 19040.90828 | 20457.05134  | 21110.25746 | -0.274464871 | 0.389330069 | 0.2952537 |
| <b>B7LCR2</b> | TY-2482_chromosome | + | 3810880 | 3811191 | 12632.10037 | 9002.283315 | 10877.35165 | 13426.62648 | 13310.37292  | 14995.1869  | -0.272490724 | 0.432604153 | 0.3300433 |
| <b>B7LCR3</b> | TY-2482_chromosome | + | 3811199 | 3811423 | 11499.8108  | 8667.068856 | 10123.3603  | 10578.30891 | 10360.86205  | 13113.63702 | -0.074997414 | 0.173529047 | 0.1280663 |
| <b>Q8FAI4</b> | TY-2482_chromosome | - | 3811444 | 3811929 | 17321.01077 | 13241.46374 | 14692.76128 | 15618.82315 | 15244.23272  | 16916.02911 | -0.017049569 | 0.072088607 | 0.0519305 |
| <b>B7LCR5</b> | TY-2482_chromosome | - | 3811991 | 3812782 | 54.73117773 | 40.47105736 | 52.92437277 | 58.34559646 | 69.24970956  | 52.90152002 | -0.225138992 | 0.589335194 | 0.4576748 |
| <b>C8ULY2</b> | TY-2482_chromosome | - | 3813225 | 3813821 | 27.77565168 | 21.74200881 | 25.74594531 | 11.50515735 | 26.71356962  | 4.615437508 | 0.807028183  | 1.597611193 | 1.322619  |
| <b>B7LCR8</b> | TY-2482_chromosome | + | 3813844 | 3815049 | 629.2112895 | 536.3066728 | 494.184951  | 393.7260246 | 475.1065053  | 442.0417939 | 0.364066106  | 1.017546695 | 0.8175935 |
| <b>C8TP27</b> | TY-2482_chromosome | - | 3815190 | 3815825 | 1912.902059 | 2003.788673 | 1954.262884 | 1367.806043 | 1393.262339  | 1524.638766 | 0.461238241  | 1.603912174 | 1.3282024 |

|               |                    |   |         |         |             |             |             |              |             |             |              |             |           |
|---------------|--------------------|---|---------|---------|-------------|-------------|-------------|--------------|-------------|-------------|--------------|-------------|-----------|
| <b>C1NBA6</b> | TY-2482_chromosome | + | 3815900 | 3816661 | 2343.71847  | 2356.849323 | 2291.59751  | 2089.985328  | 2018.374286 | 3001.500526 | 0.030782052  | 0.024226716 | 0.0161895 |
| <b>B7LCS1</b> | TY-2482_chromosome | + | 3816973 | 3818382 | 671.478106  | 740.9918569 | 661.4039976 | 575.2060198  | 548.704642  | 636.5539865 | 0.218246375  | 0.611940296 | 0.4775098 |
| <b>B7LCS2</b> | TY-2482_chromosome | - | 3818433 | 3819092 | 117.6075817 | 94.07534548 | 104.2529463 | 574.5809694  | 581.5178957 | 582.8291484 | -2.41656366  | 29.02664426 | 27.549142 |
| <b>B7LCS3</b> | TY-2482_chromosome | - | 3819203 | 3820174 | 74.16142491 | 62.80395951 | 67.95409269 | 58.76439004  | 73.76351634 | 70.96562405 | 0.068042502  | 0.023213592 | 0.0155336 |
| <b>B7LCS4</b> | TY-2482_chromosome | - | 3820276 | 3821133 | 113.7533325 | 101.2854767 | 108.2565938 | 175.4453731  | 156.4743565 | 171.0069202 | -0.618542846 | 2.941618419 | 2.0575821 |
| <b>B7LCS6</b> | TY-2482_chromosome | - | 3821734 | 3823674 | 910.9156642 | 881.0897073 | 856.8707746 | 1827.503002  | 1375.900204 | 1478.919474 | -0.860978819 | 4.114333363 | 3.5649036 |
| <b>B7LCS0</b> | TY-2482_chromosome | + | 3823864 | 3824601 | 1549.469755 | 1543.294135 | 1623.585691 | 1475.22942   | 1361.429784 | 1246.140053 | 0.191388942  | 0.512906398 | 0.3947655 |
| <b>B7LCS8</b> | TY-2482_chromosome | - | 3824597 | 3825151 | 551.0337716 | 612.4065023 | 574.3530379 | 585.1629761  | 574.2332811 | 567.0955401 | -0.020348298 | 0.013511995 | 0.0087279 |
| <b>Q8Z151</b> | TY-2482_chromosome | + | 3825410 | 3825679 | 2360.854303 | 2705.66545  | 2191.679001 | 2575.854335  | 5135.083543 | 1443.205203 | -0.440271749 | 0.382118371 | 0.290152  |
| <b>B7LCT0</b> | TY-2482_chromosome | - | 3825747 | 3827087 | 537.6823494 | 543.4440593 | 526.7903135 | 647.3073283  | 756.3149848 | 678.9424193 | -0.371316583 | 1.191161779 | 0.9667043 |
| <b>B7LCT1</b> | TY-2482_chromosome | - | 3827413 | 3828048 | 553.3561866 | 538.9605912 | 585.7361914 | 558.6551378  | 528.6456973 | 707.3243725 | -0.03990417  | 0.187231175 | 0.1380132 |
| <b>B7LCS7</b> | TY-2482_chromosome | + | 3828254 | 3829984 | 1484.369659 | 1512.323164 | 1603.81769  | 1118.38408   | 1111.162702 | 1115.66643  | 0.468580001  | 1.62996574  | 1.3508313 |
| <b>B7LCT3</b> | TY-2482_chromosome | + | 3829984 | 3833760 | 2896.427597 | 2738.564927 | 2792.086888 | 2312.027118  | 2335.119399 | 3009.648468 | 0.191760372  | 0.157297622 | 0.1150176 |
| <b>B7LCT4</b> | TY-2482_chromosome | + | 3833766 | 3834104 | 673.0366511 | 657.2602157 | 686.0154333 | 340.263279   | 566.3109683 | 364.8099266 | 0.691327245  | 2.521186844 | 2.1346108 |
| <b>B5Z310</b> | TY-2482_chromosome | + | 3834313 | 3834567 | 78.21016184 | 115.8596849 | 88.31227574 | 114.5293494  | 93.6661141  | 101.3720332 | -0.250869628 | 0.308940564 | 0.2314309 |
| <b>B7LCT2</b> | TY-2482_chromosome | + | 3834564 | 3834911 | 120.1564356 | 148.4520951 | 140.6931993 | 167.8756252  | 125.4878455 | 140.8647091 | -0.149096408 | 0.183236323 | 0.1352953 |
| <b>B7LCT7</b> | TY-2482_chromosome | - | 3834997 | 3835524 | 10166.87717 | 10032.9413  | 9922.606483 | 8522.711497  | 11348.51387 | 8033.536672 | 0.105179326  | 0.108296343 | 0.0796836 |
| <b>B7LCT8</b> | TY-2482_chromosome | + | 3835834 | 3836787 | 96.52442047 | 72.01754242 | 107.333474  | 189.0559774  | 118.1367981 | 159.1591413 | -0.696434314 | 3.075751381 | 2.6269918 |
| <b>B7LCT9</b> | TY-2482_chromosome | + | 3837100 | 3838599 | 101.0556971 | 86.15536511 | 97.0789156  | 143.6401294  | 89.91863236 | 130.0968876 | -0.339276746 | 0.958093651 | 0.7669002 |
| <b>B7LCT6</b> | TY-2482_chromosome | + | 3838616 | 3839635 | 63.14019908 | 51.8161821  | 43.1491422  | 48.05779813  | 31.68495634 | 56.10859413 | 0.232343502  | 0.402526225 | 0.3054735 |
| <b>B7LCU0</b> | TY-2482_chromosome | + | 3839625 | 3840617 | 74.26750275 | 55.64822611 | 63.9730426  | 77.92620193  | 85.54472633 | 90.64122378 | -0.315960085 | 1.075576217 | 0.8684772 |
| <b>B7LCU2</b> | TY-2482_chromosome | - | 3840656 | 3841651 | 3298.875041 | 2816.543153 | 3043.644826 | 3366.005406  | 3398.951856 | 4672.449586 | -0.233772771 | 0.421232694 | 0.3209554 |
| <b>B7LCU3</b> | TY-2482_chromosome | + | 3841827 | 3843197 | 1691.578916 | 1661.842003 | 1748.356302 | 3425.644918  | 3001.28986  | 3235.111097 | -0.920349071 | 2.071181386 | 1.734055  |
| <b>B7LCU1</b> | TY-2482_chromosome | + | 3843354 | 3843902 | 806.198947  | 735.1279123 | 822.0902354 | 736.5334296  | 843.6356559 | 870.7835579 | 0.005838364  | 0.100426357 | 0.0734368 |
| <b>B7LCU4</b> | TY-2482_chromosome | + | 3843996 | 3845345 | 2058.136313 | 1980.82305  | 1855.729813 | 2368.230156  | 2041.155684 | 2453.447395 | -0.223089748 | 0.348370162 | 0.26294   |
| <b>B7LCU6</b> | TY-2482_chromosome | + | 3845531 | 3845914 | 1117.40616  | 1002.645706 | 1009.37609  | 1527.334735  | 1658.121129 | 1697.052107 | -0.610702647 | 2.762388504 | 2.3499264 |
| <b>B7LCU7</b> | TY-2482_chromosome | - | 3845965 | 3846426 | 330.6422768 | 297.0031097 | 310.922854  | 590.4789914  | 788.1573514 | 816.7043094 | -1.153449163 | 8.193778931 | 7.3552913 |
| <b>B7LCU8</b> | TY-2482_chromosome | - | 3846587 | 3848722 | 2211.41331  | 2217.40569  | 1988.394212 | 3624.036563  | 3806.664707 | 5194.722674 | -0.937304309 | 0.402526225 | 1.7796313 |
| <b>B7LCU5</b> | TY-2482_chromosome | - | 3849128 | 3850780 | 18031.96879 | 16645.54594 | 17150.87109 | 30688.73869  | 19282.89222 | 26556.9137  | -0.577932768 | 0.74710426  | 0.5908681 |
| <b>B7LCV0</b> | TY-2482_chromosome | - | 3850833 | 3852251 | 19525.28    | 19589.32239 | 20167.56699 | 48499.78776  | 32756.24431 | 40048.68414 | -1.064644848 | 1.835892211 | 1.5289221 |
| <b>B7LCV1</b> | TY-2482_chromosome | - | 3852373 | 3853317 | 836.0917335 | 882.6930061 | 757.6866981 | 279.8636072  | 294.0121716 | 229.3048885 | 1.560550762  | 13.87537654 | 12.773538 |
| <b>B7LCV2</b> | TY-2482_chromosome | + | 3853696 | 3856389 | 470.4718689 | 440.8361379 | 435.6415249 | 1339.921118  | 1082.855334 | 1311.547429 | -1.471791003 | 12.94592113 | 11.876525 |
| <b>B7LF78</b> | TY-2482_chromosome | - | 3856623 | 3857600 | 545.7982203 | 609.7614754 | 566.4167823 | 583.0904496  | 464.8696313 | 734.7986195 | -0.039758888 | 0.085686491 | 0.0626281 |
| <b>Q1R311</b> | TY-2482_chromosome | + | 3857970 | 3858431 | 5475.116066 | 4694.115197 | 4852.606671 | 3396.999184  | 3490.003413 | 4104.408227 | 0.505223365  | 0.653496583 | 0.5112148 |
| <b>B7LCV5</b> | TY-2482_chromosome | - | 3858339 | 3858797 | 591.730761  | 505.8019805 | 519.4711979 | 355.9066662  | 311.1357193 | 404.8785444 | 0.635231862  | 2.41237074  | 2.0399305 |
| <b>B7LCV3</b> | TY-2482_chromosome | - | 3858813 | 3859745 | 930.4919466 | 786.7711004 | 838.4226522 | 540.1796182  | 501.3111588 | 753.1521584 | 0.595586756  | 1.776694581 | 1.4777121 |
| <b>B7LCV8</b> | TY-2482_chromosome | - | 3860167 | 3860559 | 55.37510023 | 58.50476905 | 47.93195342 | 44.79528529  | 47.3936471  | 32.018418   | 0.300704851  | 0.849556898 | 0.6762164 |
| <b>B7LCV9</b> | TY-2482_chromosome | - | 3860693 | 3861403 | 89.00642917 | 94.54848159 | 79.64161545 | 71.26829932  | 92.00032802 | 79.01042818 | 0.098556632  | 0.223074068 | 0.1652452 |
| <b>B7LCV6</b> | TY-2482_chromosome | + | 3861474 | 3862064 | 154.8493191 | 147.1642393 | 147.1574748 | 110.338326   | 115.6118872 | 100.19661   | 0.453954706  | 1.765098896 | 1.4678586 |
| <b>B7LCW1</b> | TY-2482_chromosome | + | 3862212 | 3862661 | 194.0731604 | 278.4909921 | 233.6847266 | 119.4036505  | 125.5900731 | 126.2761036 | 0.858735105  | 5.009073054 | 4.3847567 |
| <b>B7LCW4</b> | TY-2482_chromosome | - | 3864452 | 3865453 | 470.4376388 | 478.5808717 | 419.6559713 | 667.4016013  | 613.3521303 | 596.1256489 | -0.500792835 | 1.629768471 | 1.350815  |
| <b>B7LCW5</b> | TY-2482_chromosome | + | 3865615 | 3866028 | 1709.200377 | 2257.59529  | 2135.319921 | 1634.303019  | 2187.023344 | 1556.749589 | 0.136225767  | 0.301291642 | 0.253327  |
| <b>B7LCW6</b> | TY-2482_chromosome | - | 3866080 | 3866580 | 184.1148576 | 170.1388894 | 156.2291333 | 865.01524423 | 123.9445396 | 84.53292875 | 0.795587157  | 3.837622374 | 3.2089321 |
| <b>B7LCW8</b> | TY-2482_chromosome | - | 3868028 | 3870880 | 5997.207255 | 4841.196906 | 4982.602022 | 10961.28423  | 10067.80708 | 12965.00458 | -1.046533756 | 2.298668216 | 1.9375204 |
| <b>Q8Z117</b> | TY-2482_chromosome | - | 3870883 | 3871362 | 559.6698316 | 464.4697683 | 446.6979428 | 806.4462646  | 706.1022977 | 894.3292922 | -0.680008569 | 3.206019446 | 2.7434025 |
| <b>B7LCX0</b> | TY-2482_chromosome | - | 3871460 | 3872968 | 2747.560071 | 2535.65573  | 2880.750457 | 3474.793228  | 2926.616259 | 3733.448023 | -0.268970524 | 0.415312885 | 0.3164717 |
| <b>B7LCX1</b> | TY-2482_chromosome | + | 3873235 | 3874332 | 1443.873002 | 1602.084074 | 1689.061095 | 1243.642236  | 1181.322992 | 1432.493815 | 0.6829761376 | 0.68296422  | 0.355383  |
| <b>B7LCX2</b> | TY-2482_chromosome | + | 3874335 | 3875414 | 1475.567083 | 1416.766614 | 1338.119112 | 1338.331259  | 1369.625543 | 1372.188397 | 0.050347591  | 0.09834409  | 0.0723659 |
| <b>B7LCX3</b> | TY-2482_chromosome | - | 3875539 | 3877038 | 410.3463589 | 460.969088  | 487.4469127 | 472.1135292  | 376.5977889 | 590.1028448 | -0.04813644  | 0.151360567 | 0.1104814 |
| <b>B7LCW9</b> | TY-2482_chromosome | - | 3877119 | 3878114 | 83.74396821 | 82.66415143 | 83.8380774  | 147.561591   | 118.2604117 | 109.5183247 | -0.627161171 | 2.317072983 | 1.9546118 |
| <b>B7LCX5</b> | TY-2482_chromosome | - | 3878184 | 3879500 | 169.1471113 | 171.5893547 | 131.5961056 | 130.1173958  | 139.3122134 | 104.34034   | 0.258830447  | 0.951698696 | 0.7623223 |
| <b>B7LCX6</b> | TY-2482_chromosome | - | 3879568 | 3880329 | 40.96536264 | 50.5482078  | 44.85717266 | 132.6075173  | 89.98107054 | 98.88080477 | -1.327671183 | 6.917807956 | 6.1674832 |
| <b>B7LCX7</b> | TY-2482_chromosome | - | 3880356 | 3881384 | 34.67555373 | 24.42471923 | 26.21494058 | 156.4070081  | 105.469568  | 101.7063464 | -2.113762955 | 15.30662835 | 15.175828 |
| <b>B7LCX4</b> | TY-2482_chromosome | + | 3881601 | 3882161 | 28.5782066  | 31.72281258 | 17.2612488  | 59.42603727  | 53.70840389 | 41.20416317 | -1.142257824 | 3.469199553 | 2.977617  |
| <b>B7LCX9</b> | TY-2482_chromosome | - | 3882171 | 3883187 | 384.8965824 | 425.2924516 | 480.3017282 | 1205.771173  | 1096.547352 | 1253.649312 | -1.443333242 | 12.39362654 | 11.347065 |
| <b>B7LCY0</b> | TY-2482_chromosome | - | 3883265 | 3883468 | 464.6193484 | 519.7944821 | 277.69107   | 177.9955645  | 743.5256699 | 136.8851859 | 0.125614218  | 0.285642509 | 0.213334  |
| <b>leuX</b>   | TY-2482_chromosome | + | 3883383 | 3883467 | 460.911695  | 504.495864  | 270.4203278 | 170.7563814  | 734.4495363 | 126.3894444 | 0.135444233  | 0.287823167 | 0.2150648 |

|               |                    |   |         |         |             |             |             |             |             |             |              |             |            |
|---------------|--------------------|---|---------|---------|-------------|-------------|-------------|-------------|-------------|-------------|--------------|-------------|------------|
| <b>B7LDP4</b> | TY-2482_chromosome | - | 3883620 | 3884624 | 66.5289501  | 71.54182078 | 63.22689035 | 42.55056805 | 48.27012528 | 43.49711777 | 0.557243582  | 1.914552993 | 1.597235   |
| <b>B7LDP5</b> | TY-2482_chromosome | - | 3884536 | 3886152 | 89.86838192 | 78.06736    | 81.11808168 | 50.40018875 | 59.20811518 | 51.42095446 | 0.653889868  | 2.460504125 | 2.0812814  |
| <b>B7LDP6</b> | TY-2482_chromosome | - | 3886165 | 3887496 | 33.46290591 | 53.13308604 | 29.92987728 | 19.99924021 | 33.84572836 | 20.04153541 | 0.505548258  | 1.38449959  | 1.1355937  |
| <b>B7LDP8</b> | TY-2482_chromosome | - | 3888117 | 3888986 | 236.9877521 | 220.2592611 | 272.3223483 | 103.0571913 | 131.9088367 | 187.3038474 | 0.929313042  | 3.269454377 | 2.7973474  |
| <b>E1U309</b> | TY-2482_chromosome | - | 3889668 | 3890362 | 183.0263665 | 203.4344579 | 214.7482171 | 93.51353998 | 135.7595867 | 98.91891935 | 0.883698889  | 4.526515053 | 3.9434457  |
| <b>B7LDQ2</b> | TY-2482_chromosome | + | 3891282 | 3891575 | 36.87669708 | 65.02426458 | 61.03467777 | 45.2417877  | 63.92830085 | 28.3432262  | 0.13190832   | 0.36033404  | 0.2721147  |
| <b>B7LDQ7</b> | TY-2482_chromosome | + | 3892628 | 3893701 | 1116.46283  | 1222.620589 | 1074.012399 | 472.5584948 | 557.9121023 | 526.2343515 | 1.114325893  | 8.102067292 | 7.2704444  |
| <b>B7LDQ8</b> | TY-2482_chromosome | - | 3893758 | 3894384 | 645.500731  | 600.4448963 | 575.5470489 | 212.3319072 | 329.6739047 | 209.6158825 | 1.281170573  | 7.850450166 | 7.0423629  |
| <b>E1U309</b> | TY-2482_chromosome | + | 3894426 | 3895120 | 150.4113378 | 158.4572477 | 119.0546356 | 49.77342706 | 50.94017424 | 56.43607793 | 1.403616109  | 10.91671149 | 9.9466747  |
| <b>B7LDQ5</b> | TY-2482_chromosome | - | 3895298 | 3896119 | 1488.209441 | 1417.290273 | 1496.121511 | 1276.664237 | 1274.978383 | 1255.152535 | 0.222543445  | 0.520716378 | 0.4008232  |
| <b>B7LDR2</b> | TY-2482_chromosome | + | 3896246 | 3897838 | 350.9161304 | 324.5327316 | 286.8815115 | 124.9410565 | 165.687142  | 165.5693837 | 1.106857349  | 6.570757111 | 5.8418511  |
| <b>B7LDR3</b> | TY-2482_chromosome | + | 3897841 | 3898527 | 92.61466581 | 97.983233   | 102.4340071 | 61.26623212 | 45.38456482 | 61.65266159 | 0.799379006  | 3.59126044  | 3.0875544  |
| <b>B7LDR4</b> | TY-2482_chromosome | + | 3898591 | 3898803 | 532.331207  | 627.0535176 | 525.9998522 | 177.8185114 | 347.0142041 | 231.7782532 | 1.14185917   | 5.917258871 | 5.2287248  |
| <b>B7LDR5</b> | TY-2482_chromosome | + | 3898785 | 3899003 | 314.7665917 | 292.3897551 | 360.1318048 | 138.6167863 | 214.9193021 | 180.2309918 | 0.944603987  | 4.226738732 | 3.6698268  |
| <b>E5ZNX5</b> | TY-2482_chromosome | + | 3898904 | 3899209 | 259.4818849 | 215.9560873 | 299.5042139 | 106.5864263 | 141.122982  | 136.6848369 | 1.126417575  | 5.637201836 | 4.9712833  |
| <b>B3IA39</b> | TY-2482_chromosome | + | 3899580 | 3900001 | 149.4266877 | 164.5756094 | 163.7898946 | 40.25507281 | 54.64820287 | 56.34843443 | 1.693856226  | 14.57838692 | 13.458117  |
| <b>B7UHC5</b> | TY-2482_chromosome | - | 3900094 | 3900648 | 138.3124287 | 158.2283229 | 123.8023164 | 42.39251368 | 62.04987726 | 39.8261027  | 1.476416488  | 11.25476106 | 10.266588  |
| <b>B7LDS0</b> | TY-2482_chromosome | - | 3900779 | 3901807 | 456.2694018 | 415.400744  | 430.4197414 | 446.253941  | 447.8365523 | 295.3636414 | 0.090374661  | 0.257683817 | 0.1918458  |
| <b>B7LDS1</b> | TY-2482_chromosome | + | 3902078 | 3902518 | 38.68390664 | 41.76546109 | 50.48945174 | 47.88829631 | 42.69791738 | 55.00741655 | -0.108028022 | 0.239793455 | 0.1778139  |
| <b>B7LDS2</b> | TY-2482_chromosome | + | 3902537 | 3902821 | 54.95245571 | 78.68351464 | 77.48426222 | 63.04737983 | 54.52073027 | 69.50430955 | 0.14860438   | 0.316171277 | 0.2373338  |
| <b>B7LDR9</b> | TY-2482_chromosome | + | 3902837 | 3904090 | 473.4438421 | 458.5499984 | 435.6005072 | 411.8021955 | 424.1164865 | 372.5415036 | 0.158009159  | 0.415434378 | 0.3164737  |
| <b>B7LDS3</b> | TY-2482_chromosome | - | 3904343 | 3904594 | 77.05715687 | 65.77861635 | 80.71021483 | 22.55806986 | 42.09674251 | 21.47538047 | 1.425209927  | 6.841888719 | 6.0963569  |
| <b>B7LDS6</b> | TY-2482_chromosome | - | 3905019 | 3906029 | 240.6668827 | 277.2195206 | 248.8113046 | 151.382444  | 174.742892  | 184.0037229 | 0.580937032  | 2.386094562 | 2.0149982  |
| <b>B7LDS7</b> | TY-2482_chromosome | - | 3906044 | 3907357 | 141.1991395 | 171.0602529 | 141.0962333 | 167.1225376 | 117.2462317 | 161.6309178 | -0.044733544 | 0.022307568 | 0.0152083  |
| <b>B7LDS8</b> | TY-2482_chromosome | - | 3907388 | 3908332 | 96.40102842 | 98.11794633 | 102.3965383 | 191.3501488 | 151.0957107 | 87.72858666 | -0.634878781 | 1.575187881 | 1.3026978  |
| <b>B7LDS4</b> | TY-2482_chromosome | + | 3908608 | 3909390 | 275.9014164 | 300.5618424 | 264.5729816 | 112.5673193 | 145.6819097 | 134.1551186 | 1.092508519  | 6.967846971 | 6.2159127  |
| <b>D3GWZ4</b> | TY-2482_chromosome | - | 3909398 | 3909645 | 83.91027405 | 77.32829853 | 69.0565571  | 44.03402381 | 52.91199733 | 30.79117657 | 0.799575342  | 3.339676877 | 2.8601702  |
| <b>C1HR96</b> | TY-2482_chromosome | - | 3909624 | 3909821 | 95.20792493 | 78.13835503 | 77.69776465 | 46.47052857 | 64.79744087 | 36.05361271 | 0.763232825  | 2.814965637 | 2.3959196  |
| <b>Q8FKR7</b> | TY-2482_chromosome | + | 3910175 | 3910498 | 59.91415867 | 56.74799884 | 52.63935431 | 17.36861311 | 29.2730007  | 18.64972703 | 1.376590675  | 6.585010941 | 5.8540612  |
| <b>B7LDT2</b> | TY-2482_chromosome | - | 3910580 | 3912190 | 288.7665902 | 275.621964  | 254.6366812 | 139.3499455 | 134.6949341 | 121.2548342 | 1.020847253  | 6.582162049 | 5.8517241  |
| <b>B7LB70</b> | TY-2482_chromosome | - | 3912224 | 3912571 | 50.92931097 | 44.59269281 | 48.17223029 | 31.17226    | 41.00298561 | 39.37986819 | 0.422226678  | 0.871385563 | 0.6949135  |
| <b>B7LX21</b> | TY-2482_chromosome | - | 3912571 | 3912993 | 122.0869411 | 101.4750928 | 106.1755206 | 55.08567629 | 57.33659121 | 56.58871277 | 0.994724719  | 5.430967355 | 4.7769939  |
| <b>D3GX00</b> | TY-2482_chromosome | + | 3913084 | 3913380 | 99.43427013 | 102.8358403 | 97.63068659 | 30.74169448 | 39.23808292 | 26.63364153 | 1.604543977  | 11.57818392 | 10.57685   |
| <b>B7LDT4</b> | TY-2482_chromosome | - | 3913444 | 3914124 | 715.592645  | 734.3261163 | 767.2706616 | 304.703884  | 324.934142  | 280.4466567 | 1.278711451  | 9.730860515 | 8.8173701  |
| <b>E9WYU6</b> | TY-2482_chromosome | - | 3914164 | 3915503 | 645.9389331 | 774.0898244 | 691.1880461 | 594.8919042 | 561.4304098 | 674.6495136 | 0.181312612  | 0.50601594  | 0.3892468  |
| <b>B7LDT5</b> | TY-2482_chromosome | - | 3915686 | 3917686 | 3231.418287 | 3101.796757 | 3241.771116 | 3669.041386 | 3177.778025 | 4375.283285 | -0.187766851 | 0.278137764 | 0.2079595  |
| <b>B7LDT8</b> | TY-2482_chromosome | - | 3917837 | 3918973 | 241.4410552 | 252.5618901 | 263.5282294 | 248.225512  | 206.5929326 | 148.0082678 | 0.257300437  | 0.874970541 | 0.6982127  |
| <b>B7LDT9</b> | TY-2482_chromosome | - | 3919157 | 3920098 | 485.9007019 | 560.87444   | 542.7569523 | 777.4422635 | 719.0095075 | 466.4807097 | -0.399677273 | 0.761095597 | 0.6027124  |
| <b>B7LDU0</b> | TY-2482_chromosome | - | 3920166 | 3921113 | 569.7208419 | 587.7152646 | 645.8988164 | 1108.860502 | 1185.029274 | 696.7530015 | -0.776640481 | 3.107557375 | 2.6539573  |
| <b>B7LDT7</b> | TY-2482_chromosome | - | 3921121 | 3922206 | 815.0901754 | 821.9136166 | 846.4584412 | 1283.546071 | 1422.588053 | 759.9998688 | -0.543607378 | 1.519965521 | 1.2522606  |
| <b>Q9X692</b> | TY-2482_chromosome | - | 3922212 | 3923051 | 1170.202917 | 1356.470648 | 1237.212131 | 1407.725266 | 1651.089627 | 678.6795303 | -0.111508735 | 0.013175276 | 0.0084874  |
| <b>Q6Q6S9</b> | TY-2482_chromosome | + | 3923237 | 3924017 | 134.6797748 | 119.454268  | 131.4121301 | 162.1858087 | 110.008369  | 119.9470133 | -0.046138462 | 0.032597202 | 0.0222942  |
| <b>P71290</b> | TY-2482_chromosome | - | 3924236 | 3924541 | 359.7948525 | 315.3948026 | 351.953278  | 511.7844123 | 402.1214104 | 512.9054254 | -0.442191485 | 1.632137437 | 1.352641   |
| <b>B7LBU5</b> | TY-2482_chromosome | + | 3924612 | 3926132 | 1151.67199  | 1103.023236 | 1166.673742 | 1928.284916 | 1617.066513 | 1935.132425 | -0.665676993 | 3.021016697 | 2.5786283  |
| <b>Q0T2D8</b> | TY-2482_chromosome | + | 3926150 | 3926700 | 115.2341364 | 106.1593794 | 108.8792329 | 82.02768052 | 88.3080386  | 79.07350268 | 0.413696263  | 1.433890836 | 1.1788526  |
| <b>B7LDU8</b> | TY-2482_chromosome | + | 3926630 | 3927040 | 160.086263  | 159.4689139 | 145.0576229 | 65.47074438 | 80.16500078 | 65.94749663 | 1.120263123  | 7.58733729  | 6.7966361  |
| <b>B7LDU9</b> | TY-2482_chromosome | - | 3927604 | 3928368 | 869.1113142 | 758.3478201 | 818.011566  | 228.5677283 | 150.8382418 | 1929944586  | 1.929944586  | 14.64244437 | 13.517125  |
| <b>B7LDV1</b> | TY-2482_chromosome | - | 3928372 | 3929325 | 909.44823   | 891.0494759 | 811.8660151 | 310.0350503 | 236.4535124 | 356.0664889 | 1.538456665  | 11.60835127 | 10.605104  |
| <b>B7LDV0</b> | TY-2482_chromosome | - | 3929325 | 3930320 | 1216.126072 | 1102.938869 | 1079.979621 | 412.3391277 | 362.0907197 | 487.6874691 | 1.462840926  | 11.89804111 | 10.879177  |
| <b>B7LDV3</b> | TY-2482_chromosome | - | 3930320 | 3931219 | 1966.899803 | 1854.884746 | 1811.552767 | 730.0659511 | 697.923002  | 911.2803676 | 1.306133709  | 8.701264603 | 7.8384933  |
| <b>B7LDV4</b> | TY-2482_chromosome | - | 3931267 | 3933588 | 4288.178893 | 3967.383953 | 4097.374438 | 2111.249105 | 1776.27321  | 2658.26665  | 0.968853273  | 1.922843092 | 1.6039416  |
| <b>B7LDV5</b> | TY-2482_chromosome | - | 3933678 | 3934628 | 270.7430504 | 304.712224  | 221.3648922 | 69.67203618 | 67.33703598 | 64.57710216 | 1.895532808  | 19.20956325 | 17.9446669 |
| <b>B7LDV2</b> | TY-2482_chromosome | - | 3934628 | 3935146 | 284.3868251 | 269.9312769 | 216.1013648 | 47.79508756 | 58.32977563 | 44.97020515 | 2.309260556  | 25.4694895  | 24.055657  |
| <b>B3Y1Q0</b> | TY-2482_chromosome | + | 3936028 | 3936318 | 41.58936379 | 55.71636111 | 53.61795446 | 7.193327062 | 12.9327062  | 0.346585397 | 2.71830433   | 15.27447501 | 14.129677  |
| <b>B7LDV8</b> | TY-2482_chromosome | + | 3937057 | 3938427 | 564.6249105 | 564.0799763 | 543.9354253 | 675.9711965 | 548.6596608 | 657.7037971 | -0.184070747 | 0.389889479 | 0.2953282  |
| <b>B7LDV9</b> | TY-2482_chromosome | - | 3938672 | 3940054 | 356.1856146 | 304.7160948 | 300.8650226 | 169.2633457 | 186.5851017 | 180.243673  | 0.868797342  | 4.594772626 | 4.0065723  |
| <b>Q8XC14</b> | TY-2482_chromosome | - | 3940107 | 3940676 | 29.71449842 | 37.8253644  | 35.03341818 | 28.65543655 | 32.76436107 | 35.37165413 | 0.07496635   | 0.106684573 | 0.0788787  |

|               |                    |   |         |         |             |             |             |             |             |             |              |              |           |
|---------------|--------------------|---|---------|---------|-------------|-------------|-------------|-------------|-------------|-------------|--------------|--------------|-----------|
| <b>E3PBJ5</b> | TY-2482_chromosome | - | 3943081 | 3943359 | 70.03019988 | 45.45592426 | 46.52214873 | 17.66271761 | 59.72832873 | 8.835490562 | 0.930441865  | 1.660787481  | 1.3772883 |
| <b>B7LDW9</b> | TY-2482_chromosome | + | 3945535 | 3945729 | 75.51410369 | 54.37412019 | 92.99636766 | 70.61886014 | 66.48070049 | 45.27430802 | 0.347790458  | 0.628882527  | 0.4904133 |
| <b>C1HRB5</b> | TY-2482_chromosome | - | 3946219 | 3946431 | 246.2665597 | 426.2980903 | 316.7852649 | 186.7967999 | 197.6037048 | 117.8096433 | 0.789100737  | 4.22327471   | 3.6667057 |
| <b>B7LDX0</b> | TY-2482_chromosome | + | 3946564 | 3947238 | 277.3648037 | 315.6221256 | 266.5175738 | 274.7330276 | 295.8886113 | 186.1678549 | 0.084365561  | 0.389041244  | 0.2951892 |
| <b>E1U309</b> | TY-2482_chromosome | - | 3947255 | 3947999 | 171.1816228 | 189.7713002 | 167.5449682 | 59.1109922  | 67.43398297 | 47.75118705 | 1.538190262  | 13.65563703  | 12.662139 |
| <b>B7LDX4</b> | TY-2482_chromosome | - | 3948351 | 3949691 | 238.0866956 | 177.0983325 | 208.6058547 | 48.90530582 | 49.22599565 | 28.24688105 | 2.295911276  | 22.42763432  | 21.086352 |
| <b>B7LDX5</b> | TY-2482_chromosome | + | 3949771 | 3950076 | 57.18747524 | 40.05264009 | 42.00395892 | 92.94687163 | 57.14597471 | 93.09450982 | -0.764506851 | 2.771914937  | 2.3585752 |
| <b>B7LDX2</b> | TY-2482_chromosome | + | 3950031 | 3951212 | 321.0007523 | 278.945223  | 279.7812442 | 802.5206667 | 588.6066397 | 992.6176948 | -1.387212375 | 9.566369909  | 8.6636604 |
| <b>B7LDX7</b> | TY-2482_chromosome | + | 3951296 | 3952753 | 461.8302443 | 331.5874387 | 359.6139069 | 855.6349568 | 652.3156497 | 1104.388242 | -1.08677914  | 6.474264917  | 5.7524372 |
| <b>A8A849</b> | TY-2482_chromosome | - | 3952781 | 3952972 | 161.8397946 | 160.5729661 | 97.59748606 | 102.2113932 | 111.0175038 | 120.8564436 | 0.27163482   | 0.832824428  | 0.662734  |
| <b>B7LDX8</b> | TY-2482_chromosome | + | 3952971 | 3953741 | 943.8723719 | 893.9479419 | 845.5746276 | 538.3537616 | 567.8695697 | 586.6838206 | 0.67433064   | 3.084772226  | 2.6352096 |
| <b>B7LDX6</b> | TY-2482_chromosome | + | 3955387 | 3955776 | 90.9809839  | 121.8227535 | 101.5860324 | 29.14886421 | 27.33094603 | 18.82890266 | 1.939047351  | 15.26463006  | 14.121158 |
| <b>B7LDY2</b> | TY-2482_chromosome | - | 3955775 | 3956683 | 161.4792609 | 172.1315006 | 159.6746056 | 134.9234458 | 102.7296996 | 123.6320115 | 0.411171522  | 1.581040804  | 1.3074801 |
| <b>B7LDY3</b> | TY-2482_chromosome | - | 3956751 | 3957920 | 1150.192162 | 1041.81003  | 1199.798177 | 1729.88804  | 1514.245536 | 1775.937542 | -0.525642346 | 2.220009278  | 1.8685873 |
| <b>B7LDY4</b> | TY-2482_chromosome | - | 3957936 | 3958394 | 167.6739807 | 128.2719585 | 163.8840847 | 161.0100575 | 151.9659661 | 146.170603  | 0.056165687  | 0.011106879  | 0.0072838 |
| <b>B7LDY6</b> | TY-2482_chromosome | + | 3959324 | 3959875 | 64.23598959 | 82.58118966 | 55.03522878 | 81.54578971 | 81.01888822 | 68.67866055 | -0.322444277 | 0.457895256  | 0.0475556 |
| <b>B7LDY5</b> | TY-2482_chromosome | - | 3959894 | 3961069 | 134.7973739 | 100.009732  | 128.8670337 | 88.59085658 | 99.2573625  | 81.79812053 | 0.493981277  | 1.455128133  | 1.1958021 |
| <b>C8U0T1</b> | TY-2482_chromosome | - | 3961140 | 3962108 | 89.03109014 | 82.97522687 | 86.46800316 | 48.42628813 | 63.83938882 | 42.47374627 | 0.740999384  | 3.03203624   | 2.5885924 |
| <b>B7LDZ0</b> | TY-2482_chromosome | - | 3962065 | 3962319 | 59.10627981 | 59.11405036 | 54.65763253 | 27.54098593 | 33.77318536 | 21.43136142 | 1.021280077  | 4.489776303  | 3.9096119 |
| <b>B7LDY8</b> | TY-2482_chromosome | - | 3962319 | 3963083 | 65.12629401 | 61.98233668 | 59.28679545 | 32.26869804 | 26.37486675 | 20.14489938 | 1.156024243  | 5.793147256  | 5.1131645 |
| <b>B7LDZ2</b> | TY-2482_chromosome | - | 3963096 | 3964244 | 116.5890751 | 97.49709748 | 143.1047048 | 29.76666029 | 21.75277917 | 27.58324636 | 2.242599417  | 18.0952014   | 16.859102 |
| <b>B7LDZ3</b> | TY-2482_chromosome | - | 3964363 | 3965667 | 171.9538996 | 196.8821779 | 156.1686368 | 81.25068791 | 59.0681821  | 62.03673245 | 1.271747972  | 9.753769311  | 8.8371488 |
| <b>B7LDZ1</b> | TY-2482_chromosome | - | 3965684 | 3966913 | 249.645661  | 277.6636411 | 265.4012691 | 96.43643144 | 92.77428853 | 108.9930173 | 1.407088877  | 11.62195185  | 10.617745 |
| <b>B7LDZ5</b> | TY-2482_chromosome | + | 3967380 | 3968333 | 85.09287668 | 97.38563058 | 94.45096979 | 52.93704956 | 61.9087958  | 61.75396402 | 0.650899129  | 2.582195716  | 2.1903914 |
| <b>C6UPC5</b> | TY-2482_chromosome | - | 3968582 | 3969478 | 151.2410526 | 129.5988606 | 131.2370763 | 139.5919983 | 124.6856421 | 100.4189134 | 0.147300618  | 0.406537099  | 0.3085314 |
| <b>B7LDZ4</b> | TY-2482_chromosome | - | 3969459 | 3969938 | 79.23406865 | 77.70753288 | 82.58367987 | 64.68706202 | 73.7049518  | 83.92233226 | 0.158731523  | 0.213459537  | 0.1581238 |
| <b>Q659X8</b> | TY-2482_chromosome | + | 3970376 | 3972466 | 95.75900691 | 95.1829877  | 88.31799328 | 10.11833112 | 6.316927835 | 6.717895254 | 3.518434442  | 33.09106499  | 31.53209  |
| <b>B7LQL5</b> | TY-2482_chromosome | - | 3972519 | 3972914 | 36.66528197 | 38.19495576 | 32.82259186 | 21.36106271 | 16.03991792 | 18.83032851 | 0.467161007  | 1.033949495  | 0.8309699 |
| <b>B7LE00</b> | TY-2482_chromosome | - | 3973081 | 3974814 | 564.4911169 | 658.0942563 | 561.6748234 | 825.288073  | 678.0762614 | 306.4168528 | -0.19973929  | 0.027188074  | 0.0182471 |
| <b>B7LE01</b> | TY-2482_chromosome | - | 3974817 | 3976319 | 354.4171676 | 375.6698617 | 353.13679   | 569.0845193 | 550.6464577 | 388.7109868 | -0.55077536  | 1.577030036  | 1.3041834 |
| <b>B7LE02</b> | TY-2482_chromosome | - | 3976353 | 3978782 | 2090.905283 | 2260.79326  | 2013.539412 | 943.8732824 | 791.6552172 | 928.7260282 | 1.219769438  | 8.900505163  | 8.0264894 |
| <b>B7LE03</b> | TY-2482_chromosome | + | 3979039 | 3980709 | 1347.50502  | 1396.250869 | 1453.263097 | 1336.709372 | 1197.908361 | 112.1691115 | 0.466500946  | 0.88796477   | 0.7093445 |
| <b>B7LDZ9</b> | TY-2482_chromosome | - | 3980784 | 3981737 | 475.6277369 | 431.3671303 | 503.2728348 | 582.7649972 | 544.0628012 | 889.7855455 | -0.40509564  | 1.628974909  | 1.3502023 |
| <b>B7LE04</b> | TY-2482_chromosome | - | 3981751 | 3982077 | 136.1858097 | 121.883659  | 130.0471284 | 289.0408294 | 313.8659352 | 479.3178089 | -1.371734059 | 9.840863628  | 8.9187106 |
| <b>B7LE05</b> | TY-2482_chromosome | - | 3982085 | 3984208 | 542.1244869 | 508.5885056 | 603.7013588 | 7450.280809 | 6899.871316 | 10709.63768 | -3.820051552 | 19.75519016  | 18.476056 |
| <b>B7LE07</b> | TY-2482_chromosome | + | 3984609 | 3986270 | 1344.545502 | 1373.059627 | 1407.000951 | 2369.624792 | 1824.508513 | 2499.359428 | -0.689948364 | 3.057767921  | 2.6116743 |
| <b>B7LE06</b> | TY-2482_chromosome | - | 3986325 | 3987683 | 212.2855815 | 243.5464947 | 208.4511871 | 346.3745748 | 282.0359012 | 310.532693  | -0.564680555 | 1.857853202  | 1.5483676 |
| <b>B7LE08</b> | TY-2482_chromosome | - | 3987901 | 3988812 | 390.4277058 | 368.7508475 | 370.979791  | 590.1252514 | 520.5457308 | 442.4506514 | -0.495858821 | 1.596942382  | 1.3221294 |
| <b>B7LE10</b> | TY-2482_chromosome | - | 3990117 | 3992405 | 416.0115362 | 318.8433189 | 388.2903119 | 579.1288691 | 619.7704544 | 584.2050867 | -0.601808924 | 2.944414839  | 2.5101199 |
| <b>C8UN70</b> | TY-2482_chromosome | - | 3992662 | 3993156 | 197.1071811 | 128.711099  | 157.695334  | 219.1121257 | 278.6016509 | 212.1006279 | -0.477849166 | 1.91014053   | 1.5940065 |
| <b>B7LE12</b> | TY-2482_chromosome | - | 3993205 | 3993939 | 183.9876324 | 180.4408585 | 176.8613681 | 280.5477743 | 236.5253554 | 281.4189883 | -0.563643131 | 2.246567656  | 1.890202  |
| <b>B7LEK9</b> | TY-2482_chromosome | - | 3993945 | 3994481 | 159.4087464 | 147.1090899 | 140.4494235 | 171.3549919 | 159.1962489 | 187.9377452 | -0.19972553  | 0.533815732  | 0.4120374 |
| <b>B7LEL0</b> | TY-2482_chromosome | - | 3994591 | 3995076 | 146.7071768 | 134.2557836 | 127.8951237 | 26.08712191 | 20.00891393 | 13.61384734 | 2.695494677  | 28.23432098  | 27.763732 |
| <b>D3GY05</b> | TY-2482_chromosome | - | 3995055 | 3995885 | 344.8050212 | 325.00819   | 330.0608738 | 50.66304153 | 39.94020284 | 53.72920289 | 2.806058844  | 34.39093177  | 32.788491 |
| <b>B7LEL4</b> | TY-2482_chromosome | - | 3997844 | 3998629 | 218.4217916 | 264.7383844 | 153.0910941 | 33.01930497 | 27.25151368 | 29.0170396  | 2.683164926  | 27.95806346  | 26.510905 |
| <b>leuQ</b>   | TY-2482_chromosome | - | 3999045 | 3999131 | 372.5607533 | 257.9882643 | 160.7263751 | 157.9550473 | 281.6565271 | 89.26244161 | 0.510092092  | 1.787300079  | 0.9637988 |
| <b>leuP</b>   | TY-2482_chromosome | - | 3999166 | 3999252 | 1616.087977 | 1203.066178 | 797.9336275 | 304.996696  | 579.3224075 | 160.444463  | 1.71224519   | 1.1750302302 | 6.950095  |
| <b>leuQ</b>   | TY-2482_chromosome | - | 3999281 | 3999367 | 1510.582557 | 1171.852597 | 763.6095442 | 189.4696114 | 352.7034088 | 93.34222867 | 2.344840268  | 12.909984    | 11.843924 |
| <b>B7LEL6</b> | TY-2482_chromosome | - | 3999679 | 4000707 | 579.8369707 | 452.4240417 | 505.6692764 | 941.5623801 | 1004.697898 | 1035.301464 | -0.892489748 | 5.681096519  | 5.0094171 |
| <b>B7LEL7</b> | TY-2482_chromosome | + | 4000810 | 4001220 | 246.0615291 | 247.0955584 | 230.2708018 | 297.2591168 | 338.5727153 | 327.5617276 | -0.410753382 | 1.433041924  | 1.1781879 |
| <b>B7LEL8</b> | TY-2482_chromosome | + | 4001192 | 4001635 | 327.5812689 | 304.6928529 | 327.5134653 | 468.0163579 | 471.351687  | 570.6391326 | -0.600553079 | 2.860992056  | 2.3891929 |
| <b>A7ZVR4</b> | TY-2482_chromosome | - | 4002160 | 4003647 | 1362.674574 | 1262.516176 | 1229.20281  | 3012.219322 | 2869.310673 | 3649.124638 | -1.271039457 | 3.916176828  | 3.3832873 |
| <b>A7ZVR6</b> | TY-2482_chromosome | - | 4004373 | 4005062 | 4544.262746 | 5635.374875 | 5978.729896 | 5871.759675 | 5929.89701  | 5795.342736 | -0.135849985 | 0.127710538  | 0.0934769 |
| <b>B7LEM3</b> | TY-2482_chromosome | + | 4005418 | 4006488 | 187.9946995 | 259.3726398 | 279.0297008 | 549.8365227 | 455.8400134 | 545.8577058 | -1.115592396 | 6.270575299  | 5.5620811 |
| <b>B7LEM4</b> | TY-2482_chromosome | + | 4006488 | 4007267 | 183.7429637 | 213.3976399 | 217.3619754 | 319.396306  | 237.3793393 | 323.3980081 | -0.531820601 | 1.883582046  | 1.5705894 |
| <b>B7LEM5</b> | TY-2482_chromosome | - | 4007503 | 4008363 | 715.6129749 | 820.1796326 | 661.9139969 | 57.92401735 | 48.16004313 | 56.51104982 | 3.690497557  | 54.59100058  | 52.630625 |
| <b>B7LEM6</b> | TY-2482_chromosome | - | 4008338 | 4009885 | 2298.032399 | 2362.131814 | 2414.521169 | 150.5211881 | 123.6703464 | 152.4601232 | 4.051785711  | 66.36866505  | 64.186441 |

|               |                    |   |         |         |             |             |             |             |             |             |              |             |           |
|---------------|--------------------|---|---------|---------|-------------|-------------|-------------|-------------|-------------|-------------|--------------|-------------|-----------|
| <b>B7LEM7</b> | TY-2482_chromosome | + | 4010143 | 4010919 | 684.2751129 | 639.6589548 | 705.8878628 | 2523.857103 | 1935.514417 | 2895.185135 | -1.810342425 | 16.73974533 | 15.539792 |
| <b>B7LEM8</b> | TY-2482_chromosome | + | 4011000 | 4012319 | 791.2597673 | 755.0618922 | 755.8967963 | 3943.851974 | 2521.518315 | 4489.567994 | -2.226058594 | 9.711124267 | 8.7991904 |
| <b>B7LEM9</b> | TY-2482_chromosome | + | 4012374 | 4013594 | 2644.029896 | 1877.328191 | 2111.930715 | 6982.184101 | 5688.565545 | 8973.139791 | -1.605744351 | 4.897483484 | 4.2822855 |
| <b>B7LENO</b> | TY-2482_chromosome | + | 4013677 | 4014393 | 3625.742136 | 2961.026256 | 3232.444407 | 4040.298775 | 4229.807975 | 6423.278257 | -0.464163141 | 0.909959615 | 0.7270108 |
| <b>D3GY25</b> | TY-2482_chromosome | - | 4014560 | 4014821 | 79.67845476 | 130.0611239 | 84.16135426 | 71.27481719 | 51.76925896 | 61.85643798 | 0.498199298  | 1.27926394  | 1.7843097 |
| <b>B7LEN2</b> | TY-2482_chromosome | - | 4014855 | 4015868 | 517.1899313 | 628.0482491 | 660.4935715 | 549.7457784 | 464.0231506 | 583.89826   | 0.1740104    | 0.389405006 | 0.2952537 |
| <b>B7LEN3</b> | TY-2482_chromosome | - | 4015899 | 4016540 | 275.7923847 | 311.1402904 | 301.0898526 | 320.6479396 | 273.8533922 | 306.5115686 | -0.049750305 | 0.037559515 | 0.0254137 |
| <b>B7LEN4</b> | TY-2482_chromosome | + | 4016646 | 4017611 | 469.5880297 | 476.6732115 | 485.2932844 | 860.8656677 | 774.3536651 | 1013.955197 | -0.860149047 | 4.836685714 | 4.2257819 |
| <b>B7LEN5</b> | TY-2482_chromosome | + | 4017663 | 4019042 | 842.0074064 | 885.7643715 | 844.3685189 | 995.6609162 | 769.7456087 | 1130.978442 | -0.167315372 | 4.020744803 | 0.305573  |
| <b>B7LEN6</b> | TY-2482_chromosome | + | 4019066 | 4020295 | 965.2403537 | 1132.617872 | 1096.049181 | 597.9861086 | 548.6302299 | 828.143009  | 0.723058306  | 3.107632473 | 2.6539573 |
| <b>B7LEN7</b> | TY-2482_chromosome | - | 4020608 | 4022272 | 5187.151729 | 4596.057226 | 4721.241668 | 8427.197743 | 7288.518058 | 8589.50841  | -0.724473467 | 1.282826641 | 1.046399  |
| <b>B7LEN8</b> | TY-2482_chromosome | + | 4022483 | 4024417 | 1207.755018 | 1187.708339 | 1200.943963 | 2021.774127 | 1524.217777 | 1811.588813 | -0.592513068 | 2.244563401 | 1.8888457 |
| <b>B7LEN9</b> | TY-2482_chromosome | + | 4024510 | 4024833 | 205.6809521 | 208.3344088 | 189.9682701 | 157.8551674 | 157.4997333 | 114.95387   | 0.426664133  | 1.749481124 | 1.4558106 |
| <b>B5Z4S6</b> | TY-2482_chromosome | - | 4024881 | 4025399 | 201.8830298 | 203.5969045 | 203.9960812 | 210.183472  | 231.2370816 | 175.3662588 | -0.041887125 | 0.02503522  | 0.0167737 |
| <b>B7LEP1</b> | TY-2482_chromosome | + | 4025442 | 4026086 | 660.5785845 | 521.9562548 | 588.2281596 | 579.6681889 | 617.9137858 | 665.5330051 | -0.003932597 | 0.136912982 | 0.1006098 |
| <b>B7LEP2</b> | TY-2482_chromosome | + | 4026089 | 4026955 | 3549.279508 | 3426.099083 | 3404.095004 | 2340.897012 | 2717.43881  | 2771.85528  | 0.437218167  | 0.593880405 | 0.4616489 |
| <b>B7LEP3</b> | TY-2482_chromosome | + | 4027166 | 4027636 | 330.4632638 | 342.6300619 | 347.9795939 | 409.9071731 | 342.9911934 | 420.8215816 | -0.199744675 | 0.486038937 | 0.3728657 |
| <b>B7LEP4</b> | TY-2482_chromosome | + | 4027652 | 4028338 | 275.7201026 | 311.6310843 | 334.9677377 | 463.0386033 | 405.8004762 | 485.2866951 | -0.546574119 | 2.146063161 | 1.8005847 |
| <b>B7LEP5</b> | TY-2482_chromosome | + | 4028341 | 4029762 | 265.3474378 | 295.6824739 | 282.5685991 | 260.8833892 | 227.4550554 | 244.7275717 | 0.170069929  | 0.502547276 | 0.3864002 |
| <b>B7LEP6</b> | TY-2482_chromosome | + | 4029823 | 4031172 | 74.60374579 | 87.0334936  | 84.56569347 | 54.62001814 | 59.23640208 | 39.92732379 | 0.618688163  | 2.431604701 | 2.5557864 |
| <b>B7LEP7</b> | TY-2482_chromosome | - | 4031238 | 4031951 | 5495.038355 | 5579.525172 | 5884.76702  | 4431.405359 | 4958.912306 | 4620.494993 | 0.291945728  | 0.337048682 | 0.253468  |
| <b>B7LEP9</b> | TY-2482_chromosome | + | 4032587 | 4033270 | 199.3965476 | 236.6607723 | 249.8036089 | 194.8263621 | 193.9504229 | 111.3081068 | 0.375210412  | 1.317426509 | 1.0772102 |
| <b>B7L4C7</b> | TY-2482_chromosome | + | 4033633 | 4036092 | 1358.776616 | 1370.510377 | 1395.752457 | 4289.893365 | 3134.042445 | 4687.108714 | -1.539263442 | 4.691591792 | 4.0928877 |
| <b>B7L4C8</b> | TY-2482_chromosome | + | 4036097 | 4037026 | 906.3517626 | 904.3230972 | 918.3861961 | 2105.708017 | 1501.411677 | 2184.895351 | -1.079755058 | 6.328350604 | 5.6149657 |
| <b>B7L4C9</b> | TY-2482_chromosome | + | 4037030 | 4038313 | 1267.569759 | 1252.119594 | 1276.230836 | 2978.430404 | 2350.536894 | 3030.95937  | -1.133724688 | 4.642918032 | 4.0498983 |
| <b>A7ZVW4</b> | TY-2482_chromosome | - | 4038609 | 4039017 | 184.6467658 | 214.814827  | 170.0403459 | 206.7495472 | 249.4714616 | 184.5496726 | -0.24583714  | 0.382229397 | 0.290152  |
| <b>B7L4D1</b> | TY-2482_chromosome | - | 4038983 | 4039756 | 672.3928346 | 596.0614592 | 652.9990914 | 659.790731  | 823.7203568 | 634.4203945 | -0.113101086 | 0.310288219 | 0.2326647 |
| <b>B7L4D2</b> | TY-2482_chromosome | - | 4039829 | 4041256 | 872.5311147 | 1062.340406 | 919.5832552 | 107.1332298 | 135.5899863 | 165.2478728 | 2.820626583  | 33.22097735 | 31.658542 |
| <b>B7L4D3</b> | TY-2482_chromosome | + | 4041535 | 4042485 | 10045.93737 | 8385.446789 | 8810.057616 | 11863.60561 | 11924.37115 | 13261.21829 | -0.396100636 | 0.584276456 | 0.4534619 |
| <b>B7L4D4</b> | TY-2482_chromosome | + | 4042603 | 4043187 | 1052.872079 | 1097.277979 | 1105.259382 | 744.4930402 | 799.0157183 | 860.2373439 | 0.457654562  | 1.659151999 | 1.3763833 |
| <b>B7L4D5</b> | TY-2482_chromosome | - | 4043228 | 4043791 | 354.3990401 | 393.1868975 | 345.7934462 | 191.8679219 | 178.3438736 | 179.0063454 | 0.944706434  | 6.167033769 | 5.4633759 |
| <b>B7L4D6</b> | TY-2482_chromosome | - | 4043943 | 4044653 | 32.64179306 | 51.36299031 | 35.43998965 | 34.5933945  | 29.13569103 | 18.93535014 | 0.341036912  | 1.038034651 | 0.8345993 |
| <b>B7L4D8</b> | TY-2482_chromosome | + | 4045460 | 4047373 | 9713.85477  | 8436.677682 | 8640.36942  | 22161.49182 | 17146.16081 | 21061.57493 | -1.162966952 | 2.371472259 | 2.0019385 |
| <b>B7L4D9</b> | TY-2482_chromosome | + | 4047465 | 4048592 | 1731.633188 | 1343.244418 | 1320.155301 | 3153.126764 | 2495.238136 | 3182.2735   | -0.980865005 | 2.613364622 | 2.2164701 |
| <b>D6I4R4</b> | TY-2482_chromosome | - | 4048702 | 4048941 | 1861.015873 | 1356.815588 | 1493.939609 | 739.3701198 | 1802.534174 | 540.5727676 | 0.649518108  | 1.366115058 | 1.1193979 |
| <b>B7L4E0</b> | TY-2482_chromosome | + | 4049437 | 4050600 | 1162.909451 | 1105.578647 | 1155.418503 | 886.4443832 | 995.6532214 | 877.6648167 | 0.325039802  | 0.904073287 | 0.7219936 |
| <b>B7L4E1</b> | TY-2482_chromosome | + | 4050663 | 4051565 | 253.3980843 | 255.6335385 | 288.7356812 | 259.9360103 | 265.7174678 | 282.7549357 | 0.01627261   | 0.026015181 | 0.017495  |
| <b>Q1RGI0</b> | TY-2482_chromosome | + | 4055974 | 4056306 | 6365.01639  | 5970.679113 | 5330.431859 | 2518.263132 | 6212.568121 | 2471.614565 | 0.653787319  | 0.947787662 | 0.7587055 |
| <b>B7L4E6</b> | TY-2482_chromosome | + | 4056427 | 4056642 | 272.1980103 | 297.6889785 | 245.9805714 | 245.7191503 | 472.7542513 | 191.6731108 | -0.222798641 | 0.25769951  | 0.1918458 |
| <b>B7L4E7</b> | TY-2482_chromosome | + | 4056653 | 4057591 | 1799.261174 | 1833.96611  | 1810.328892 | 2812.932653 | 2550.842455 | 2537.946736 | -0.559687304 | 0.977483422 | 0.7833719 |
| <b>B7L4E8</b> | TY-2482_chromosome | + | 4057637 | 4060450 | 8696.774622 | 7740.992384 | 7736.486149 | 18421.99127 | 14237.61617 | 19109.03104 | -1.081899937 | 2.170262773 | 1.822671  |
| <b>B7L4E9</b> | TY-2482_chromosome | + | 4060453 | 4060944 | 1819.632022 | 1626.027969 | 1641.882262 | 2944.726092 | 2739.192908 | 3161.248629 | -0.772497068 | 1.666753018 | 1.3816056 |
| <b>B7L4F0</b> | TY-2482_chromosome | + | 4061035 | 4061481 | 1020.846792 | 1017.209753 | 932.7158613 | 1640.046526 | 1273.030864 | 1656.144056 | -0.638364977 | 5.11400869  | 2.1261689 |
| <b>B7L4F1</b> | TY-2482_chromosome | + | 4061486 | 4062433 | 1185.311419 | 1235.892951 | 1122.887951 | 1856.755151 | 1507.850201 | 1825.947457 | -0.579067827 | 2.11796395  | 1.7758457 |
| <b>B7L4F2</b> | TY-2482_chromosome | + | 4062502 | 4063413 | 596.8830359 | 574.283627  | 519.3540125 | 594.3403434 | 463.9642214 | 705.9582667 | -0.048831722 | 0.107652768 | 0.0792433 |
| <b>B7L4F3</b> | TY-2482_chromosome | + | 4063583 | 4064401 | 1057.192028 | 1241.041874 | 1259.884637 | 792.4181909 | 808.0741149 | 973.2102221 | 0.485851514  | 1.617982011 | 1.3406534 |
| <b>B7L4F4</b> | TY-2482_chromosome | + | 4064860 | 4066005 | 2865.062451 | 2786.859035 | 2527.137824 | 183.7375755 | 159.1321781 | 233.6420736 | 3.848699615  | 56.61908453 | 54.593207 |
| <b>B7L4F5</b> | TY-2482_chromosome | + | 4066026 | 4069244 | 19907.52925 | 18842.49709 | 18956.59202 | 712.9802274 | 603.2010195 | 978.0601144 | 4.712868665  | 22.9170082  | 21.560859 |
| <b>B7L4F6</b> | TY-2482_chromosome | - | 4069258 | 4069473 | 188.9842806 | 137.5650327 | 120.2940463 | 11.43013712 | 6.285622862 | 9.22106336  | 4.027149484  | 40.63905762 | 38.909131 |
| <b>C3TRD2</b> | TY-2482_chromosome | + | 4069403 | 4069900 | 349.2818217 | 317.7656554 | 349.9858249 | 49.26692551 | 55.59380992 | 39.83347584 | 2.814061353  | 34.83760524 | 33.21965  |
| <b>B7L4F8</b> | TY-2482_chromosome | - | 4069992 | 4070579 | 85.81523758 | 102.2316828 | 95.74612988 | 33.87035399 | 43.74980257 | 38.19669752 | 1.277634749  | 7.706261008 | 6.9096429 |
| <b>B7L4F9</b> | TY-2482_chromosome | - | 4070588 | 4071478 | 72.89995158 | 95.03846649 | 107.3748858 | 52.29072198 | 49.96550414 | 71.86077791 | 0.705434016  | 2.376800688 | 2.0065979 |
| <b>B7L4G0</b> | TY-2482_chromosome | - | 4071482 | 4073032 | 123.2676554 | 138.4954853 | 130.0323426 | 133.213423  | 94.54713666 | 100.2107194 | 0.184615215  | 0.634566472 | 0.4949176 |
| <b>B7L4G1</b> | TY-2482_chromosome | - | 4073109 | 4074323 | 67.35324434 | 64.57732805 | 62.61326663 | 55.65874224 | 52.71127381 | 69.38015966 | 0.161057307  | 0.23713185  | 0.1755911 |
| <b>B7L4G2</b> | TY-2482_chromosome | - | 4074455 | 4075594 | 294.8069799 | 282.9459782 | 237.9766422 | 59.71143805 | 54.53833789 | 66.88941006 | 2.158650435  | 23.11428974 | 21.751609 |
| <b>B7L4G3</b> | TY-2482_chromosome | - | 4075628 | 4077139 | 25.51909477 | 21.36109768 | 23.04767902 | 31.21628793 | 18.05741096 | 28.80002418 | -0.146783366 | 0.190482655 | 0.140518  |
| <b>B5YYD5</b> | TY-2482_chromosome | + | 4077550 | 4078380 | 25.99164625 | 32.75943997 | 30.40637486 | 28.99861126 | 18.96769227 | 33.81876951 | 0.108221836  | 0.140269508 | 0.1032424 |

|               |                    |   |         |         |             |             |             |             |             |             |              |             |           |
|---------------|--------------------|---|---------|---------|-------------|-------------|-------------|-------------|-------------|-------------|--------------|-------------|-----------|
| <b>B7L4G5</b> | TY-2482_chromosome | + | 4078398 | 4079336 | 38.89948404 | 25.82022306 | 46.67405397 | 35.12951635 | 26.32594136 | 27.7726408  | 0.407762315  | 0.628637705 | 0.4902993 |
| <b>B7L4G6</b> | TY-2482_chromosome | + | 4079390 | 4080673 | 42.54844147 | 46.10939285 | 44.2112554  | 48.29252807 | 35.4083955  | 39.57050359 | 0.061611701  | 0.127744976 | 0.0934769 |
| <b>B7L4G8</b> | TY-2482_chromosome | + | 4081019 | 4082347 | 14.00870623 | 23.48302039 | 14.99750716 | 37.92021441 | 29.09524814 | 22.78833212 | -0.962459983 | 1.837653488 | 1.5304904 |
| <b>B7L4G9</b> | TY-2482_chromosome | + | 4082458 | 4082985 | 79.32495287 | 81.78939696 | 68.38982144 | 69.29221059 | 70.9135974  | 96.85279658 | -0.03061324  | 0.063379848 | 0.044615  |
| <b>B7L4H0</b> | TY-2482_chromosome | + | 4082981 | 4084840 | 337.2114157 | 352.7043294 | 343.2857792 | 383.9620743 | 376.6902042 | 475.8600315 | -0.234941158 | 0.679570053 | 0.5331824 |
| <b>B5YZB4</b> | TY-2482_chromosome | + | 4084924 | 4085511 | 323.1654079 | 264.5429707 | 327.6523308 | 377.5501234 | 427.8070674 | 342.3580445 | -0.279624936 | 0.936661726 | 0.7494872 |
| <b>B7L4H2</b> | TY-2482_chromosome | - | 4085595 | 4086434 | 735.0755755 | 747.0844835 | 753.3316275 | 869.2758964 | 778.872686  | 1153.161603 | -0.278945015 | 0.955561729 | 0.7655962 |
| <b>B7L4H3</b> | TY-2482_chromosome | - | 4086444 | 4086818 | 798.0150873 | 770.2209563 | 728.732038  | 848.8943647 | 788.9003992 | 1121.631846 | -0.224948844 | 0.723233543 | 0.5697159 |
| <b>B7L4H4</b> | TY-2482_chromosome | - | 4086824 | 4087642 | 2218.087499 | 2233.156391 | 2148.307149 | 2740.238222 | 2632.679186 | 3612.12176  | -0.40763977  | 0.679941218 | 0.5334133 |
| <b>B7L4H5</b> | TY-2482_chromosome | - | 4087642 | 4088628 | 2144.253375 | 1957.703443 | 1750.61774  | 2796.742124 | 2842.036139 | 3443.920673 | -0.609653753 | 1.141893691 | 0.9256545 |
| <b>B7L4H6</b> | TY-2482_chromosome | - | 4088631 | 4089914 | 4894.753012 | 4271.663517 | 4484.243747 | 10311.15519 | 10236.22911 | 11104.98542 | -1.177126955 | 2.744447817 | 2.3352781 |
| <b>B7L4H7</b> | TY-2482_chromosome | - | 4089970 | 4092321 | 4572.337877 | 4338.083416 | 4375.312418 | 7392.116056 | 6896.320551 | 7601.533236 | -0.709060922 | 1.237637092 | 1.0069121 |
| <b>B7L4H8</b> | TY-2482_chromosome | + | 4092576 | 4093388 | 636.9767468 | 718.2218993 | 713.1265114 | 646.103299  | 739.0401282 | 612.0009586 | 0.029454896  | 0.09491957  | 0.0695471 |
| <b>B7L4H9</b> | TY-2482_chromosome | - | 4093511 | 4094167 | 601.2691823 | 607.7102305 | 572.292078  | 461.1520208 | 584.279021  | 635.1024599 | 0.122742493  | 0.160064336 | 0.1172992 |
| <b>B7L4I0</b> | TY-2482_chromosome | - | 4094182 | 4097085 | 1253.717821 | 992.878958  | 988.7627492 | 1678.323778 | 1609.783042 | 2193.906853 | -0.690048583 | 3.35055434  | 2.86961   |
| <b>B7L4I1</b> | TY-2482_chromosome | - | 4097253 | 4099601 | 835.9913194 | 896.029402  | 862.8922547 | 761.8526612 | 664.2512228 | 799.7079725 | 0.212374109  | 0.591940401 | 0.4599668 |
| <b>B7L4I2</b> | TY-2482_chromosome | - | 4099679 | 4100371 | 25.33876453 | 24.03809019 | 29.91251255 | 40.58801509 | 30.78781188 | 57.22442466 | -0.606754843 | 1.743470689 | 1.4503612 |
| <b>B7L4I3</b> | TY-2482_chromosome | - | 4100543 | 4102042 | 85.95734171 | 92.22269889 | 83.72669197 | 122.2428215 | 86.27690682 | 142.8844768 | -0.426344278 | 1.274841697 | 1.0397241 |
| <b>B7L4I4</b> | TY-2482_chromosome | - | 4102056 | 4103753 | 39.81698527 | 27.57707361 | 36.35435418 | 73.99642773 | 53.6038044  | 58.048749   | -0.802553969 | 3.047896637 | 2.6028649 |
| <b>D2NB21</b> | TY-2482_chromosome | + | 4103875 | 4104096 | 74.75635634 | 70.33168921 | 79.34182444 | 111.0822111 | 109.2188279 | 97.56702124 | -0.493324555 | 1.892186476 | 1.5780185 |
| <b>B5YZA0</b> | TY-2482_chromosome | + | 4104041 | 4104967 | 298.2598382 | 331.7070809 | 314.2415845 | 501.6687497 | 390.3589576 | 354.3061749 | -0.479377368 | 1.241080407 | 1.0097795 |
| <b>B7L4I6</b> | TY-2482_chromosome | + | 4105056 | 4105817 | 214.4241145 | 276.1367656 | 219.6404378 | 216.4262206 | 258.5065657 | 243.3722911 | -0.07251313  | 0.032273343 | 0.0220678 |
| <b>B7L4I7</b> | TY-2482_chromosome | - | 4105937 | 4106632 | 147.5932446 | 124.1955627 | 114.5651501 | 95.910214   | 141.1378763 | 140.5069829 | 0.096511275  | 0.059993106 | 0.042518  |
| <b>B7L4I8</b> | TY-2482_chromosome | - | 4106619 | 4108226 | 108.3507539 | 115.6923554 | 112.888793  | 149.2751301 | 182.9331786 | 202.2824203 | -0.629431238 | 2.937760593 | 2.5039827 |
| <b>B7L4I9</b> | TY-2482_chromosome | - | 4108205 | 4109185 | 74.81918766 | 60.97631364 | 80.11759686 | 179.926605  | 161.9139189 | 195.8173943 | -1.237930682 | 9.527379736 | 8.626946  |
| <b>B7L4J0</b> | TY-2482_chromosome | - | 4109352 | 4111004 | 266.544991  | 209.846783  | 212.3578847 | 173.2455933 | 164.651853  | 202.3145598 | 0.403114123  | 1.054805421 | 0.8498473 |
| <b>B7L4J1</b> | TY-2482_chromosome | + | 4111326 | 4112501 | 269.09706   | 295.7933031 | 285.878372  | 123.4052264 | 117.3480474 | 134.0411521 | 1.176971941  | 8.184332457 | 7.3465004 |
| <b>B7L4J2</b> | TY-2482_chromosome | - | 4112556 | 4113158 | 196.6647856 | 191.0689347 | 200.7460418 | 152.1143708 | 158.3109018 | 186.5226531 | 0.28774707   | 0.670900733 | 0.5253052 |
| <b>B7L4J3</b> | TY-2482_chromosome | - | 4113172 | 4114569 | 305.0736136 | 294.3600727 | 325.6248854 | 294.4337143 | 198.1957588 | 320.5509234 | 0.21920437   | 0.401946107 | 0.3050123 |
| <b>B7LFU4</b> | TY-2482_chromosome | - | 4114575 | 4115663 | 242.404776  | 214.6741244 | 227.7431495 | 199.8970294 | 145.4630037 | 199.7475826 | 0.349393844  | 0.943129903 | 0.755076  |
| <b>B7LFU5</b> | TY-2482_chromosome | + | 4115666 | 4117234 | 255.7776641 | 225.490777  | 270.889445  | 144.5950622 | 106.3177048 | 161.410112  | 0.928377115  | 4.281244197 | 3.7208882 |
| <b>B7LFU7</b> | TY-2482_chromosome | + | 4119014 | 4119014 | 52.62262845 | 39.74198026 | 40.71718134 | 54.42501751 | 39.0742503  | 34.59245669 | 0.022949261  | 0.063986591 | 0.0451224 |
| <b>B7LFU8</b> | TY-2482_chromosome | + | 4119335 | 4121056 | 256.5909999 | 254.6171782 | 222.8890722 | 281.669189  | 271.1510164 | 303.7659361 | -0.234763421 | 0.568696345 | 0.4400625 |
| <b>B5YZB5</b> | TY-2482_chromosome | + | 4121032 | 4121550 | 117.5577719 | 110.642028  | 96.75855598 | 123.569997  | 104.5737532 | 124.8629791 | -0.136021095 | 0.252017718 | 0.1875587 |
| <b>B7LFV0</b> | TY-2482_chromosome | + | 4121733 | 4122734 | 1595.207184 | 1458.70215  | 1546.92694  | 1799.658011 | 1413.190885 | 1760.148795 | -0.097670294 | 0.233955641 | 0.1737286 |
| <b>E6A074</b> | TY-2482_chromosome | + | 4122903 | 4123103 | 50.13243072 | 59.78541136 | 38.47480784 | 38.25285802 | 38.26371012 | 27.99971898 | 0.370985441  | 1.201211089 | 0.974995  |
| <b>B7LFV1</b> | TY-2482_chromosome | + | 4123339 | 4123794 | 1081.888223 | 1261.609156 | 1263.812627 | 1004.677169 | 1152.207379 | 946.1811476 | 0.19341544   | 0.52502618  | 0.4043799 |
| <b>B7LFV2</b> | TY-2482_chromosome | + | 4123799 | 4124737 | 1906.95367  | 1870.521199 | 1981.431498 | 3027.456729 | 3209.786068 | 2907.66077  | -0.659324638 | 1.250301254 | 1.0176812 |
| <b>B7LFV3</b> | TY-2482_chromosome | + | 4124737 | 4125099 | 725.6716616 | 583.4427596 | 613.204269  | 1061.923395 | 1096.637258 | 998.7153603 | -0.691116301 | 3.62344681  | 3.1151644 |
| <b>B7LFV4</b> | TY-2482_chromosome | + | 4125118 | 4126881 | 2180.223176 | 2108.421336 | 1492.788305 | 1378.667404 | 2031.433731 | 1444.8582   | 0.204759364  | 0.579229896 | 0.4493146 |
| <b>B7LFV5</b> | TY-2482_chromosome | + | 4126871 | 4128355 | 3052.792398 | 2713.236652 | 2865.378513 | 3818.215588 | 3428.997601 | 4054.539426 | -0.356806994 | 0.55536181  | 0.4296612 |
| <b>B7LFV6</b> | TY-2482_chromosome | + | 4128355 | 4129710 | 2365.561498 | 2125.630012 | 2104.675086 | 3440.003554 | 2840.152115 | 3699.222404 | -0.576770178 | 1.032360766 | 0.8300095 |
| <b>B7LFV7</b> | TY-2482_chromosome | + | 4129707 | 4130786 | 1959.505725 | 1746.973378 | 1709.825222 | 2817.197954 | 2873.006625 | 3140.213776 | -0.678258044 | 1.369635277 | 1.1227502 |
| <b>B7LFV8</b> | TY-2482_chromosome | + | 4130792 | 4132105 | 2979.406821 | 2890.377885 | 2918.198387 | 3567.327436 | 3125.929671 | 3932.091391 | -0.253948763 | 0.351797226 | 0.2659034 |
| <b>B7LFV9</b> | TY-2482_chromosome | + | 4132108 | 4133349 | 1897.938094 | 2029.303907 | 1917.908257 | 1723.750876 | 1695.373571 | 1982.377551 | 0.117419316  | 0.183015765 | 0.1352872 |
| <b>B7LFW0</b> | TY-2482_chromosome | + | 4133349 | 4134413 | 1635.458313 | 1659.042372 | 1714.020005 | 1610.82585  | 1583.444989 | 1796.934937 | 0.027048452  | 0.008390637 | 0.0054068 |
| <b>B7LFW1</b> | TY-2482_chromosome | + | 4134470 | 4135942 | 3019.725165 | 3065.319436 | 3089.240646 | 3540.901746 | 3306.126271 | 4283.233909 | -0.248182095 | 0.357927797 | 0.2704074 |
| <b>B7LFW2</b> | TY-2482_chromosome | + | 4135938 | 4136855 | 2015.253203 | 2286.699676 | 2201.240703 | 2494.256679 | 2230.457026 | 2657.346723 | -0.19583978  | 0.224183002 | 0.1659191 |
| <b>B7LFW3</b> | TY-2482_chromosome | + | 4136860 | 4137687 | 1745.337171 | 1923.54854  | 1815.597706 | 1252.213952 | 1210.301858 | 1473.173844 | 0.482104348  | 1.735488995 | 1.4433128 |
| <b>B7LFW4</b> | TY-2482_chromosome | + | 4137687 | 4138946 | 2739.111714 | 3270.275598 | 3055.57217  | 3206.318402 | 2671.820883 | 3110.035017 | -0.029066653 | 0.012020336 | 0.0078734 |
| <b>B7LFW5</b> | TY-2482_chromosome | + | 4139010 | 4140158 | 6433.534086 | 6684.511538 | 7142.564545 | 9079.353698 | 7071.864568 | 9811.506009 | -0.338460916 | 0.448500519 | 0.3427952 |
| <b>B7LFW6</b> | TY-2482_chromosome | + | 4140262 | 4141176 | 10786.89277 | 9825.02851  | 10554.53342 | 12406.02789 | 13068.33288 | 13728.32685 | -0.290440591 | 0.394676114 | 0.2991674 |
| <b>D6J5V7</b> | TY-2482_chromosome | - | 4141154 | 4141405 | 813.6747503 | 798.5984535 | 776.9974824 | 850.8666858 | 919.1430729 | 993.1010635 | -0.187693735 | 0.56375278  | 0.4363967 |
| <b>B5YZD3</b> | TY-2482_chromosome | + | 4141335 | 4141919 | 1213.007304 | 1213.13138  | 1157.934116 | 893.2267207 | 1079.295011 | 1346.60639  | 0.169114441  | 0.217100729 | 0.2062492 |
| <b>B7LFW8</b> | TY-2482_chromosome | + | 4141984 | 4144686 | 4714.337715 | 4765.354526 | 4780.0887   | 5597.964881 | 4964.105127 | 10602.40322 | -0.456029702 | 0.800481856 | 0.6362641 |
| <b>B7LFW9</b> | TY-2482_chromosome | + | 4144749 | 4145135 | 165.8061447 | 195.1302142 | 190.8879027 | 181.4836744 | 191.9429658 | 266.4355942 | -0.173536906 | 0.488550466 | 0.3748883 |
| <b>C8TGN2</b> | TY-2482_chromosome | - | 4145241 | 4145435 | 305.8888616 | 306.3693331 | 287.0564364 | 258.6076368 | 286.7063537 | 263.209518  | 0.144936924  | 0.349138823 | 0.2635928 |



|        |                    |   |         |         |             |             |             |             |             |             |              |             |           |
|--------|--------------------|---|---------|---------|-------------|-------------|-------------|-------------|-------------|-------------|--------------|-------------|-----------|
| B7LFX0 | TY-2482_chromosome | - | 4145448 | 4146188 | 535.4368914 | 515.7467175 | 550.6974269 | 564.5727755 | 573.287995  | 670.6828574 | -0.130907427 | 0.397598642 | 0.3016154 |
| B7LFX1 | TY-2482_chromosome | - | 4146191 | 4146808 | 381.021695  | 533.7660032 | 468.7908696 | 237.7801108 | 225.6662998 | 231.5761428 | 0.922893457  | 5.660475712 | 4.9901347 |
| B7LFX2 | TY-2482_chromosome | + | 4147033 | 4148073 | 1360.92875  | 1468.072161 | 1488.242097 | 1208.167146 | 1182.997689 | 1470.487589 | 0.186901666  | 0.358430819 | 0.2706776 |
| B7LFX3 | TY-2482_chromosome | - | 4148114 | 4149313 | 50.01354331 | 51.74828544 | 54.88753195 | 42.38204846 | 50.9856238  | 52.48564331 | 0.139982647  | 0.18679062  | 0.1376792 |
| B7LFX4 | TY-2482_chromosome | - | 4149306 | 4150688 | 28.89493793 | 46.27863743 | 32.16576578 | 48.46352114 | 32.67153445 | 34.43456332 | -0.273059749 | 0.177033321 | 0.1303656 |
| D6J5W8 | TY-2482_chromosome | + | 4151160 | 4151381 | 45.02461931 | 32.66158215 | 42.31977896 | 26.70466117 | 30.02962778 | 32.74293797 | 0.518703043  | 0.990336452 | 0.7944358 |
| B7LFX6 | TY-2482_chromosome | - | 4151344 | 4152234 | 622.2575112 | 582.6674881 | 597.4675269 | 288.695979  | 299.3627838 | 357.5149938 | 0.97663622   | 5.360839435 | 4.7109447 |
| B7LFX7 | TY-2482_chromosome | + | 4152322 | 4152870 | 738.6910209 | 768.1852505 | 879.7169148 | 607.1763044 | 683.4577954 | 716.842581  | 0.298944818  | 0.667755588 | 0.5229577 |
| B7LFX8 | TY-2482_chromosome | + | 4152870 | 4153721 | 939.9180899 | 999.3259538 | 1010.21202  | 943.6546728 | 902.7225828 | 1015.504569 | 0.049950155  | 0.084646907 | 0.0621902 |
| B7LFX9 | TY-2482_chromosome | - | 4153770 | 4155140 | 559.4380614 | 523.4362453 | 538.0502748 | 313.0940313 | 352.236274  | 321.0974472 | 0.734115026  | 3.381211197 | 2.8999788 |
| B7LFY0 | TY-2482_chromosome | + | 4155681 | 4156442 | 1018.809155 | 820.4918084 | 878.6551959 | 1867.975729 | 2146.803222 | 2433.544538 | -1.166413716 | 8.389719514 | 7.5419489 |
| B7LFY1 | TY-2482_chromosome | + | 4156606 | 4159266 | 36570.11864 | 34086.43157 | 35832.2662  | 105358.611  | 75061.76162 | 123527.7415 | -1.47102604  | 3.221193997 | 2.7566401 |
| B7LFY2 | TY-2482_chromosome | + | 4159284 | 4161173 | 26654.72962 | 22096.41698 | 22496.65917 | 92046.97346 | 59849.32343 | 98406.19226 | -1.780455401 | 4.317111584 | 3.7518875 |
| B7LFY3 | TY-2482_chromosome | + | 4161501 | 4162922 | 25247.84342 | 24686.59945 | 23374.79872 | 65987.92726 | 53107.7523  | 69622.06438 | -1.365353254 | 2.836623595 | 2.415073  |
| B7LFY4 | TY-2482_chromosome | - | 4162999 | 4164753 | 188.3652981 | 198.2704419 | 198.7548676 | 223.2077493 | 164.6374985 | 163.4368543 | 0.029999524  | 0.158559323 | 0.1160042 |
| B7LFY5 | TY-2482_chromosome | + | 4165108 | 4167702 | 25473.81451 | 20971.24488 | 23773.75516 | 26101.55983 | 19329.29783 | 32308.19003 | -0.067539465 | 0.138633643 | 0.1019164 |
| B7LFY6 | TY-2482_chromosome | + | 4167881 | 4168240 | 425.5132596 | 432.5669243 | 410.5557267 | 248.0654581 | 215.5483738 | 323.0463833 | 0.72001237   | 2.929262907 | 2.4965172 |
| B7LFY7 | TY-2482_chromosome | - | 4168284 | 4169075 | 1568.07731  | 1679.406141 | 1733.218445 | 956.7062344 | 828.9240797 | 1201.919567 | 0.773094676  | 3.252393225 | 2.7836594 |
| B7LFY8 | TY-2482_chromosome | - | 4169094 | 4169957 | 2166.405749 | 2228.22631  | 2297.01695  | 1313.326892 | 1222.115658 | 1537.61169  | 0.744109139  | 3.293395268 | 2.819875  |
| B7LFY9 | TY-2482_chromosome | - | 4170066 | 4170581 | 238.339655  | 314.4908916 | 242.7131589 | 117.3148267 | 126.4839132 | 139.2580666 | 0.995144909  | 6.13676825  | 5.4355085 |
| B7LFZ0 | TY-2482_chromosome | + | 4170576 | 4172123 | 448.6872467 | 450.809151  | 443.6237434 | 425.21478   | 330.24372   | 386.7760551 | 0.211802635  | 0.58855822  | 0.4571002 |
| B7LFZ1 | TY-2482_chromosome | - | 4172176 | 4174563 | 857.6763361 | 883.7048026 | 923.0953575 | 2274.543373 | 2247.726595 | 3159.469609 | -1.46748636  | 11.82878426 | 10.812891 |
| B7LGP1 | TY-2482_chromosome | + | 4174769 | 4175302 | 1879.274804 | 1901.073515 | 1918.64358  | 1771.64021  | 2111.407371 | 1772.321397 | 0.01378666   | 0.014697979 | 0.0096252 |
| B7LGI8 | TY-2482_chromosome | + | 4175349 | 4176008 | 1551.077453 | 1450.72524  | 1486.140677 | 3847.937753 | 5699.851528 | 4093.173508 | -1.578210429 | 4.823451606 | 4.2133324 |
| B7LGI9 | TY-2482_chromosome | + | 4176117 | 4177040 | 453.8153092 | 461.6195293 | 514.5247109 | 999.8021658 | 827.1599622 | 903.8731155 | -0.932630743 | 5.356894572 | 4.7078489 |
| B7LGJ0 | TY-2482_chromosome | + | 4177040 | 4177807 | 399.280284  | 374.6700635 | 448.5603358 | 705.9123368 | 696.1612667 | 744.55461   | -0.763326223 | 4.081394581 | 3.5343187 |
| B7LGJ1 | TY-2482_chromosome | + | 4177915 | 4178352 | 161.9686412 | 217.2880598 | 192.8003124 | 202.2236813 | 217.5448421 | 190.9462495 | -0.158527118 | 0.193675295 | 0.1429626 |
| B7LGJ2 | TY-2482_chromosome | + | 4178419 | 4179645 | 492.0187145 | 542.5281271 | 469.8819421 | 316.4517775 | 327.6207276 | 326.2760655 | 0.598114692  | 2.731736612 | 2.3245155 |
| B7LGJ3 | TY-2482_chromosome | - | 4179655 | 4180032 | 882.2864101 | 975.9277073 | 977.8810052 | 939.3202131 | 1209.527363 | 1158.942965 | -0.198528335 | 0.544580049 | 0.4204019 |
| B7LGJ4 | TY-2482_chromosome | + | 4180306 | 4181205 | 93.17807352 | 120.1155532 | 117.0073494 | 47.48526748 | 58.2331583  | 70.62413271 | 0.930458103  | 4.313117506 | 3.7485923 |
| B7LGJ5 | TY-2482_chromosome | - | 4181285 | 4182133 | 1668.439618 | 1648.618932 | 1616.176235 | 1951.11089  | 1953.876177 | 1933.997589 | -0.246954922 | 0.645025561 | 0.5041939 |
| B7LGJ6 | TY-2482_chromosome | - | 4182148 | 4182939 | 1226.413804 | 1190.675838 | 1297.474067 | 1004.788467 | 908.1569745 | 1074.666632 | 0.343655593  | 0.897602367 | 0.7173046 |
| B7LGJ7 | TY-2482_chromosome | - | 4183055 | 4184326 | 43.50925453 | 41.046249   | 34.70903128 | 22.49959194 | 52.27459174 | 13.95654831 | 0.377148909  | 0.66210881  | 0.5179745 |
| B7LGK4 | TY-2482_chromosome | - | 4190642 | 4191118 | 79.22928269 | 80.00827144 | 81.21401921 | 130.5659334 | 127.3590009 | 148.4531574 | -0.73554888  | 3.690387022 | 3.1743685 |
| B7LGK5 | TY-2482_chromosome | - | 4191118 | 4192533 | 1225.090728 | 1097.990663 | 1114.367565 | 2160.564744 | 1996.579079 | 2400.75041  | -0.900250381 | 5.225196381 | 4.5841351 |
| B7LGK6 | TY-2482_chromosome | - | 4192575 | 4193498 | 247.2574404 | 332.6943812 | 271.213275  | 268.5267648 | 261.1456094 | 289.3054833 | -0.009296707 | 0.092154726 | 0.0677899 |
| E7IEQ9 | TY-2482_chromosome | - | 4193468 | 4193990 | 3865.442958 | 4352.343436 | 4030.007403 | 3383.21719  | 3827.710861 | 3698.172949 | 0.15290613   | 0.189378757 | 0.1397342 |
| B7LGK8 | TY-2482_chromosome | + | 4194171 | 4194872 | 982.3898653 | 1171.41474  | 1185.947383 | 1438.746502 | 1661.834888 | 1384.252436 | -0.4460526   | 1.382924521 | 1.1341874 |
| B7LGL0 | TY-2482_chromosome | + | 4195491 | 4197917 | 935.4257519 | 1042.485587 | 965.8504681 | 804.5072354 | 754.3890405 | 816.9377752 | 0.283240269  | 0.988056896 | 0.7926042 |
| B7LGL1 | TY-2482_chromosome | + | 4198116 | 4200647 | 2022.32822  | 1706.430376 | 1851.255625 | 3141.157907 | 2821.089302 | 3254.693196 | -0.685521987 | 1.412398652 | 1.1606139 |
| B7LGL2 | TY-2482_chromosome | + | 4200870 | 4203110 | 2228.631732 | 2125.264167 | 2061.779874 | 299.2246205 | 370.4936535 | 301.4794403 | 2.726899864  | 35.27403612 | 33.644074 |
| B7LGL3 | TY-2482_chromosome | + | 4203164 | 4203958 | 305.1678842 | 281.4856827 | 298.428383  | 108.2167913 | 98.18982038 | 133.7775953 | 1.430708399  | 10.35728407 | 9.411429  |
| B7LGL4 | TY-2482_chromosome | + | 4203961 | 4204848 | 212.4739128 | 193.8052341 | 198.6597302 | 71.81462449 | 65.5202837  | 56.8568385  | 1.619578486  | 15.30839731 | 14.158254 |
| B7LGL5 | TY-2482_chromosome | + | 4204848 | 4206827 | 410.7034992 | 403.7900104 | 332.3687971 | 133.4349768 | 138.3865541 | 106.9506038 | 1.533774158  | 13.37631766 | 12.29216  |
| B7LGL6 | TY-2482_chromosome | - | 4206868 | 4208145 | 3462.663698 | 2909.408313 | 3194.853085 | 4240.320473 | 4351.844646 | 4708.439857 | -0.421830107 | 0.716812483 | 0.5641072 |
| B7LGL7 | TY-2482_chromosome | + | 4208370 | 4209788 | 892.031253  | 1008.92893  | 934.1715319 | 707.1726898 | 732.5864232 | 751.1652255 | 0.352102901  | 1.276563585 | 1.0411189 |
| B7LGL8 | TY-2482_chromosome | + | 4210214 | 4210987 | 877.1694496 | 942.0451557 | 843.6094911 | 1731.950169 | 2548.326731 | 1909.184854 | -1.228343041 | 7.65705719  | 6.8628712 |
| B7LGL9 | TY-2482_chromosome | - | 4210267 | 4210887 | 254.924031  | 270.2760595 | 266.0724318 | 247.6486839 | 231.1189806 | 240.7744682 | 0.122419098  | 0.310447748 | 0.2327105 |
| B7LGM0 | TY-2482_chromosome | - | 4210928 | 4211725 | 676.8239002 | 616.6386743 | 689.3808411 | 856.4265991 | 753.4432241 | 887.8852468 | -0.297666095 | 1.032882487 | 0.8300547 |
| B7LGM1 | TY-2482_chromosome | - | 4211721 | 4212416 | 2211.466905 | 2014.90602  | 2043.332825 | 2564.459578 | 2449.810234 | 2746.859282 | -0.284066214 | 0.428882871 | 0.3272089 |
| B7LGM2 | TY-2482_chromosome | + | 4212500 | 4214014 | 664.6936687 | 751.3302348 | 691.8548926 | 652.9502527 | 560.5199611 | 624.8906634 | 0.158051055  | 0.487147434 | 0.3737271 |
| B7LGM3 | TY-2482_chromosome | + | 4214147 | 4215568 | 1445.51294  | 1417.327919 | 1551.68458  | 5633.188872 | 5306.415507 | 7030.181537 | -1.969306345 | 7.045646904 | 6.288848  |
| B7LGM4 | TY-2482_chromosome | + | 4215726 | 4216880 | 352.7090679 | 439.341526  | 412.7013776 | 413.2696781 | 367.6204605 | 372.4278204 | 0.008113842  | 0.113219203 | 0.0827057 |
| B7LGM5 | TY-2482_chromosome | - | 4216975 | 4217358 | 959.4962746 | 965.7262392 | 901.7280627 | 653.868093  | 971.321602  | 491.5164914 | 0.373629659  | 1.192560157 | 0.9679431 |
| B7LGM6 | TY-2482_chromosome | - | 4217676 | 4218497 | 4712.7248   | 4807.193087 | 5555.505247 | 4659.207238 | 5598.714509 | 4921.816215 | 0.026821767  | 0.009275279 | 0.005932  |
| B7LGM7 | TY-2482_chromosome | - | 4218531 | 4221200 | 1474.036762 | 1383.781177 | 1432.024949 | 843.7115384 | 780.7239907 | 1046.767707 | 0.731928352  | 2.967999906 | 2.5311106 |
| B7LGM8 | TY-2482_chromosome | - | 4221265 | 4222056 | 2388.394299 | 2755.479483 | 2683.250749 | 1970.551413 | 2350.726547 | 2151.064741 | 0.267882573  | 0.366514221 | 0.2773611 |

|                |                    |   |         |         |             |             |             |             |             |             |              |             |           |
|----------------|--------------------|---|---------|---------|-------------|-------------|-------------|-------------|-------------|-------------|--------------|-------------|-----------|
| <b>B7LGM9</b>  | TY-2482_chromosome | - | 4222059 | 4222277 | 196.0087619 | 197.7791976 | 168.726683  | 204.1613179 | 174.7504442 | 124.3071449 | 0.059272614  | 0.323053284 | 0.2429194 |
| <b>tff</b>     | TY-2482_chromosome | + | 4222262 | 4222397 | 12597.29    | 13249.64632 | 12577.39248 | 5785.17272  | 5843.469025 | 5146.927436 | 1.161963515  | 2.62208527  | 2.2241173 |
| <b>B7LGN0</b>  | TY-2482_chromosome | + | 4222424 | 4223146 | 52036.8577  | 49142.2799  | 54878.85809 | 41893.35609 | 37119.1299  | 39263.24711 | 0.415509938  | 0.466325226 | 0.3567183 |
| <b>A1A7L4</b>  | TY-2482_chromosome | - | 4223104 | 4224153 | 52612.68805 | 51586.27158 | 53992.06933 | 46642.30709 | 37438.52353 | 41226.16888 | 0.324423906  | 0.370626774 | 0.2807721 |
| <b>B7LGN2</b>  | TY-2482_chromosome | + | 4224405 | 4225127 | 3545.262596 | 4161.90812  | 4143.751786 | 3068.543051 | 2459.780342 | 2728.635276 | 0.48067283   | 0.830244767 | 0.6505764 |
| <b>B7LGN3</b>  | TY-2482_chromosome | + | 4225422 | 4225976 | 6454.564527 | 6272.700164 | 6745.708064 | 6393.789307 | 6952.837069 | 6257.206558 | 0.00528779   | 0.008855486 | 0.0056081 |
| <b>B7LGN4</b>  | TY-2482_chromosome | + | 4226071 | 4227264 | 802.178253  | 1008.218946 | 893.2456292 | 1658.343606 | 1489.700874 | 1605.040961 | -0.871693823 | 4.123134745 | 3.5730301 |
| <b>B7LGN5</b>  | TY-2482_chromosome | + | 4227453 | 4228211 | 1066.34467  | 1097.375012 | 1115.168026 | 2336.033227 | 2209.577274 | 2261.57743  | -1.059678846 | 6.673946341 | 5.9373262 |
| <b>B7LGN6</b>  | TY-2482_chromosome | + | 4228227 | 4229081 | 1322.193495 | 1270.328048 | 1310.559057 | 2163.811023 | 2220.519352 | 2268.083734 | -0.751123962 | 3.850327824 | 3.3209941 |
| <b>B7LGN7</b>  | TY-2482_chromosome | + | 4229096 | 4230445 | 3015.238248 | 3129.405513 | 3015.888238 | 4120.689471 | 4972.601886 | 4345.584032 | -0.554204603 | 0.889025222 | 0.7102614 |
| <b>B7LGN8</b>  | TY-2482_chromosome | + | 4230478 | 4232907 | 10363.52432 | 10239.20208 | 10584.25058 | 24658.1738  | 21269.63777 | 25237.288   | -1.180359891 | 2.413730107 | 2.0410654 |
| <b>B7LGN9</b>  | TY-2482_chromosome | + | 4233032 | 4233514 | 8742.983545 | 8418.286191 | 8837.934242 | 14767.6846  | 15309.79694 | 15440.0335  | -0.786978254 | 1.372987915 | 1.1257667 |
| <b>B7LGP0</b>  | TY-2482_chromosome | + | 4233521 | 4234543 | 6999.08386  | 6430.01892  | 6832.77668  | 9466.063217 | 8938.4868   | 9561.844021 | -0.442991059 | 0.645973612 | 0.5048408 |
| <b>Q14F34</b>  | TY-2482_chromosome | + | 4234579 | 4235103 | 2550.878928 | 2473.200031 | 2554.453222 | 3241.537235 | 3328.97342  | 3261.448921 | -0.364600179 | 0.54057753  | 0.4172917 |
| <b>B7LGP3</b>  | TY-2482_chromosome | + | 4235110 | 4235895 | 4197.686927 | 4095.478659 | 3817.950841 | 5776.433899 | 6465.064318 | 5674.409102 | -0.576597236 | 0.886889507 | 0.7086997 |
| <b>B7LGP4</b>  | TY-2482_chromosome | + | 4235898 | 4237043 | 1616.148698 | 1593.128482 | 1498.603053 | 1689.046035 | 1643.518646 | 1775.988413 | -0.125747079 | 0.293619188 | 0.1933957 |
| <b>B7LGP5</b>  | TY-2482_chromosome | + | 4237043 | 4237636 | 601.3733781 | 513.9309585 | 583.7057924 | 681.4805041 | 646.9585895 | 845.5057679 | -0.280369775 | 1.064364578 | 0.8583373 |
| <b>B7LGP6</b>  | TY-2482_chromosome | + | 4237676 | 4241155 | 3794.608225 | 3539.673379 | 3582.360024 | 4515.444438 | 4680.368751 | 5193.843114 | -0.365560446 | 0.557808062 | 0.4313441 |
| <b>B7LGP7</b>  | TY-2482_chromosome | + | 4241171 | 4242127 | 3622.62827  | 3220.762282 | 3475.478455 | 4355.840288 | 4914.313933 | 4711.213191 | -0.39740372  | 0.636019692 | 0.4961083 |
| <b>B7LGP8</b>  | TY-2482_chromosome | + | 4242229 | 4244367 | 705.1017981 | 686.1874823 | 815.0197347 | 936.4123507 | 828.9515806 | 1092.894748 | -0.313170124 | 1.224024426 | 0.9947538 |
| <b>B7LGP9</b>  | TY-2482_chromosome | + | 4244427 | 4244813 | 224.417621  | 211.568083  | 209.8564553 | 295.2570318 | 326.7098091 | 347.1508039 | -0.554342237 | 2.46182819  | 2.0823775 |
| <b>B7LGG0</b>  | TY-2482_chromosome | + | 4244881 | 4246176 | 570.7199466 | 520.8196075 | 516.169235  | 494.0255409 | 430.3941428 | 464.430364  | 0.208471149  | 0.532003545 | 0.410477  |
| <b>B5Z0G8</b>  | TY-2482_chromosome | - | 4246231 | 4246488 | 726.8226418 | 754.6947626 | 757.3043631 | 581.1157718 | 704.5203845 | 492.5047325 | 0.308304983  | 0.974158472 | 0.7806417 |
| <b>B7LGG2</b>  | TY-2482_chromosome | - | 4246478 | 4246765 | 697.5676949 | 780.0390387 | 768.5632775 | 482.4973189 | 627.194411  | 426.716167  | 0.518985703  | 2.001136132 | 1.6730153 |
| <b>B7LGG3</b>  | TY-2482_chromosome | + | 4246841 | 4247383 | 389.4925064 | 407.2359078 | 436.5654066 | 434.1655312 | 405.8502789 | 419.7091003 | -0.028015759 | 0.053357719 | 0.0377608 |
| <b>B7LGG4</b>  | TY-2482_chromosome | + | 4247383 | 4247802 | 365.0113037 | 310.6677305 | 374.5204596 | 461.0891482 | 372.0815211 | 506.1758749 | -0.28667513  | 0.998308725 | 0.8009116 |
| <b>B7LGG5</b>  | TY-2482_chromosome | + | 4247819 | 4248526 | 551.7442094 | 584.9720668 | 635.33852   | 933.2831386 | 818.96939   | 952.3777755 | -0.598303323 | 2.674678241 | 2.2730112 |
| <b>B7LGF78</b> | TY-2482_chromosome | + | 4248779 | 4249756 | 565.3184789 | 574.4934325 | 577.7035814 | 575.8341589 | 476.7148921 | 728.2481916 | -0.014805264 | 0.089982857 | 0.0965826 |
| <b>E7H755</b>  | TY-2482_chromosome | - | 4250208 | 4250786 | 44.90032061 | 52.368297   | 35.22581953 | 46.85684281 | 39.08700523 | 39.601186   | -0.031333078 | 0.067567918 | 0.048306  |
| <b>B7LHA4</b>  | TY-2482_chromosome | - | 4250842 | 4252557 | 3555.390193 | 3053.41433  | 3237.062451 | 6147.634626 | 4911.399315 | 7063.084709 | -0.83076683  | 1.712315431 | 1.4231126 |
| <b>B7LHA5</b>  | TY-2482_chromosome | - | 4252672 | 4253376 | 344.114026  | 339.5371801 | 290.1826888 | 399.5751318 | 413.9995992 | 550.6900184 | -0.461261882 | 1.643868203 | 1.3628637 |
| <b>B7LHA6</b>  | TY-2482_chromosome | - | 4253376 | 4253777 | 488.4039308 | 456.4166731 | 463.4192422 | 502.0449054 | 542.3519366 | 653.4629067 | -0.216581933 | 0.726013101 | 0.5719531 |
| <b>B7LHA7</b>  | TY-2482_chromosome | - | 4253898 | 4254710 | 2423.867191 | 2141.439135 | 2265.882763 | 2623.033727 | 2762.068644 | 2230.318854 | -0.155604977 | 0.185390292 | 0.1368113 |
| <b>B7LHA8</b>  | TY-2482_chromosome | - | 4254753 | 4255403 | 649.9886942 | 600.5280476 | 582.8259026 | 713.2162335 | 708.9285907 | 688.1513314 | -0.204920129 | 0.515368096 | 0.3964364 |
| <b>B7LHA9</b>  | TY-2482_chromosome | - | 4255399 | 4256427 | 211.7379136 | 196.1348718 | 191.9906497 | 507.5660175 | 514.167058  | 530.1526917 | -1.359353091 | 10.67157054 | 9.7103255 |
| <b>B7LHB0</b>  | TY-2482_chromosome | + | 4256615 | 4257184 | 998.1643877 | 1120.232051 | 1150.927115 | 672.3340142 | 763.5935549 | 671.1086728 | 0.627656868  | 2.979190833 | 2.5412594 |
| <b>E9WNY3</b>  | TY-2482_chromosome | - | 4257464 | 4257697 | 105062.7516 | 478548.276  | 203794.0317 | 38553.81465 | 59832.13024 | 111882.0856 | 1.661432358  | 3.302916357 | 2.8288295 |
| <b>rrsD</b>    | TY-2482_chromosome | + | 4257551 | 4259092 | 844159.4624 | 3749859.915 | 1828189.888 | 199945.3881 | 234419.8798 | 756515.2612 | 2.296895489  | 4.416842423 | 3.8456329 |
| <b>Q57H85</b>  | TY-2482_chromosome | + | 4258672 | 4258989 | 211076.398  | 950541.1191 | 432149.5649 | 13892.05002 | 17679.18788 | 86908.43024 | 3.675784783  | 7.583750354 | 6.7936364 |
| <b>ileT</b>    | TY-2482_chromosome | + | 4259161 | 4259237 | 573.0648007 | 650.8113675 | 327.7985737 | 161.3688633 | 423.8224297 | 114.3142321 | 0.989202228  | 3.172349799 | 2.7116613 |
| <b>alaT</b>    | TY-2482_chromosome | + | 4259280 | 4259355 | 342.3610581 | 302.3264092 | 156.0521254 | 125.9310832 | 328.2523964 | 87.98328294 | 0.454875168  | 0.996512538 | 0.7992653 |
| <b>rrfE</b>    | TY-2482_chromosome | + | 4259539 | 4262442 | 462611.8435 | 4780436.047 | 1278609.695 | 1068425.799 | 878818.1781 | 4716870.431 | -0.424253205 | 0.016670604 | 0.0107305 |
| <b>Q1R3T8</b>  | TY-2482_chromosome | - | 4259765 | 4260067 | 86845.23028 | 716214.5376 | 231259.5255 | 298460.8456 | 247360.7185 | 1198482.399 | -1.075287986 | 0.633937612 | 0.4946838 |
| <b>C1HUN3</b>  | TY-2482_chromosome | - | 4261125 | 4261328 | 27950.62736 | 342358.2535 | 90477.44555 | 80585.36554 | 67082.21119 | 387523.8843 | -0.614131057 | 0.126125982 | 0.0927098 |
| <b>C1HUN1</b>  | TY-2482_chromosome | - | 4261405 | 4261857 | 88984.01539 | 1006093.783 | 244285.6623 | 70734.30591 | 42340.58308 | 478103.1067 | 0.826585222  | 0.962196025 | 0.7707543 |
| <b>C1HUN0</b>  | TY-2482_chromosome | - | 4261861 | 4262217 | 74812.47543 | 764560.6488 | 206460.9116 | 48061.48621 | 30799.311   | 335674.6335 | 1.031978102  | 1.180454236 | 0.9588592 |
| <b>rrfC</b>    | TY-2482_chromosome | + | 4262536 | 4262655 | 3642.667786 | 14063.33604 | 172.6251108 | 17214.32398 | 157877.1875 | 7371.769125 | -4.213280418 | 3.22465413  | 2.8455344 |
| <b>B7LHB1</b>  | TY-2482_chromosome | + | 4262760 | 4263032 | 218.1498164 | 395.8760834 | 120.2161315 | 504.8454918 | 1058.780984 | 572.8251217 | -1.84126959  | 5.659750404 | 4.9898546 |
| <b>aspT</b>    | TY-2482_chromosome | + | 4262847 | 4262923 | 92.51617718 | 183.7301846 | 42.91750031 | 239.6494026 | 481.8122114 | 238.7816163 | -1.953475791 | 5.105931025 | 4.4753479 |
| <b>B7LHB2</b>  | TY-2482_chromosome | + | 4263085 | 4263885 | 168.8779099 | 182.7617547 | 185.5992324 | 405.5819337 | 338.4955604 | 322.5922355 | -1.032168813 | 5.860216967 | 5.175383  |
| <b>B7LHB4</b>  | TY-2482_chromosome | - | 4263888 | 4264799 | 248.0605663 | 288.028162  | 289.9675089 | 174.6994522 | 181.1298385 | 160.6964048 | 0.650545323  | 3.067621254 | 2.6201967 |
| <b>B7LHB5</b>  | TY-2482_chromosome | + | 4265040 | 4265837 | 975.0796206 | 979.3899251 | 1084.946501 | 775.4116162 | 799.9105424 | 879.9671901 | 0.34754073   | 0.972380204 | 0.7793089 |
| <b>B7LHB6</b>  | TY-2482_chromosome | + | 4265918 | 4266685 | 134.6516255 | 126.6944345 | 130.0272951 | 94.66988563 | 91.00417209 | 84.36961901 | 0.529275974  | 2.162870279 | 1.8154903 |
| <b>B7LHB7</b>  | TY-2482_chromosome | - | 4266739 | 4268094 | 1813.16151  | 1353.93766  | 1411.334599 | 2223.631308 | 2510.013047 | 1967.19002  | -0.524827382 | 1.436506676 | 1.1806247 |
| <b>B7LHB8</b>  | TY-2482_chromosome | - | 4268169 | 4268921 | 325.0869497 | 398.0090562 | 359.130885  | 495.569152  | 519.7878716 | 282.420735  | -0.378780565 | 0.578458525 | 0.4486716 |
| <b>B7LHB9</b>  | TY-2482_chromosome | + | 4268955 | 4269674 | 587.6826142 | 633.4067044 | 627.2479677 | 420.1763183 | 451.4063066 | 434.1858112 | 0.496718821  | 1.944886974 | 1.6233998 |
| <b>C4X416</b>  | TY-2482_chromosome | - | 4269677 | 4270252 | 513.6840763 | 543.2650009 | 529.4845296 | 343.3428748 | 417.8417154 | 304.2994679 | 0.548579293  | 2.236799738 | 1.88216   |

|               |                    |   |         |         |             |             |             |             |             |             |              |             |           |
|---------------|--------------------|---|---------|---------|-------------|-------------|-------------|-------------|-------------|-------------|--------------|-------------|-----------|
| <b>D3GS43</b> | TY-2482_chromosome | + | 4270197 | 4270934 | 608.7741359 | 569.916622  | 602.1465509 | 507.7531618 | 553.411981  | 395.1882789 | 0.273615457  | 0.787095878 | 0.6246799 |
| <b>A1A7Q7</b> | TY-2482_chromosome | - | 4270842 | 4271153 | 249.9808642 | 248.7073913 | 180.3390122 | 106.7395458 | 191.5495774 | 58.97369176 | 0.818913442  | 2.903092289 | 2.4741956 |
| <b>aspT</b>   | TY-2482_chromosome | + | 4271070 | 4271146 | 145.8494443 | 114.937626  | 54.99828057 | 26.59369105 | 106.2927356 | 16.89120509 | 0.991102834  | 1.949709258 | 1.6276232 |
| <b>B7LHC3</b> | TY-2482_chromosome | - | 4272887 | 4273813 | 38.08989624 | 32.40660943 | 44.52278493 | 50.3578284  | 38.2993909  | 7.609572608 | 0.153046741  | 0.308778571 | 0.2313826 |
| <b>B7LHC4</b> | TY-2482_chromosome | - | 4273845 | 4274324 | 26.70722107 | 31.04638766 | 35.23716666 | 52.01647014 | 50.22818733 | 8.975754613 | -0.398166846 | 0.092122845 | 0.1282677 |
| <b>B7LHC5</b> | TY-2482_chromosome | - | 4274351 | 4275790 | 122.5512103 | 133.518034  | 126.7234369 | 52.57412568 | 51.87386943 | 48.79614035 | 1.289951222  | 9.820052649 | 8.8986943 |
| <b>B7LHC6</b> | TY-2482_chromosome | - | 4275714 | 4279235 | 180.8062823 | 210.4003663 | 196.0710079 | 164.6147225 | 155.5251132 | 212.6449104 | 0.150282654  | 0.300983281 | 0.2251765 |
| <b>B7LHC7</b> | TY-2482_chromosome | - | 4279257 | 4280735 | 66.49449855 | 69.48511945 | 68.65512493 | 90.19330228 | 64.47219585 | 91.8496064  | -0.275582258 | 0.645155351 | 0.5041939 |
| <b>B7LHC8</b> | TY-2482_chromosome | - | 4280677 | 4281417 | 32.75913531 | 44.42818946 | 32.11844273 | 58.53431012 | 42.6294253  | 66.70980539 | -0.689550761 | 1.719308413 | 1.4295497 |
| <b>B7LHC9</b> | TY-2482_chromosome | - | 4281417 | 4284287 | 167.5527331 | 157.6434972 | 163.0528197 | 228.7054406 | 152.6844726 | 261.2559609 | -0.36464867  | 1.114034788 | 0.901071  |
| <b>B7LHD0</b> | TY-2482_chromosome | - | 4284185 | 4284943 | 45.70821778 | 41.59620232 | 40.80916712 | 47.17166719 | 34.41151064 | 66.38217501 | -0.150004911 | 0.330418482 | 0.2484497 |
| <b>B7LHD1</b> | TY-2482_chromosome | - | 4284951 | 4286279 | 95.09145111 | 87.81747552 | 83.00353473 | 91.90701889 | 83.65731975 | 101.1029701 | -0.044798344 | 0.091957434 | 0.0676932 |
| <b>B7LHD2</b> | TY-2482_chromosome | - | 4286285 | 4286806 | 30.7160679  | 38.73375261 | 20.56714509 | 38.05046758 | 18.9471999  | 28.96188235 | -0.106121383 | 0.039356853 | 0.0268069 |
| <b>B7LHD3</b> | TY-2482_chromosome | - | 4286806 | 4288104 | 63.51166964 | 77.88751656 | 55.08592427 | 75.82422588 | 45.30651894 | 79.85108032 | -0.114468009 | 0.054554331 | 0.0385627 |
| <b>B7LHD4</b> | TY-2482_chromosome | - | 4288111 | 4289196 | 48.5728251  | 57.70523557 | 42.60037781 | 44.15487153 | 33.57035923 | 44.57842542 | 0.210221618  | 0.532172172 | 0.4105197 |
| <b>B7LHD5</b> | TY-2482_chromosome | - | 4289157 | 4291004 | 136.4310402 | 101.9549588 | 108.7455395 | 68.04102817 | 80.11968016 | 77.57693891 | 0.68208082   | 2.653129206 | 2.3537774 |
| <b>B7LHD6</b> | TY-2482_chromosome | - | 4291011 | 4291421 | 28.73104122 | 53.67872276 | 40.26391349 | 25.5924407  | 29.18370671 | 21.32606336 | 0.548176076  | 1.612031498 | 1.2357828 |
| <b>B7LHD7</b> | TY-2482_chromosome | - | 4291431 | 4292903 | 88.20873463 | 108.4399953 | 72.81720729 | 85.33506835 | 80.03421679 | 91.95335993 | -0.020723498 | 0.089243647 | 0.0653818 |
| <b>B7LHD9</b> | TY-2482_chromosome | - | 4293216 | 4293713 | 45.91615096 | 36.57017269 | 31.99285973 | 23.9897519  | 30.98196083 | 30.17362469 | 0.460257558  | 0.88725791  | 0.7089247 |
| <b>B7LHE1</b> | TY-2482_chromosome | + | 4294410 | 4294925 | 55.95259087 | 57.25143816 | 66.24427486 | 34.83322777 | 60.2003647  | 51.22500715 | 0.370364538  | 0.624375012 | 0.4873432 |
| <b>B7LHE2</b> | TY-2482_chromosome | + | 4295138 | 4297276 | 44.68467573 | 22.89486791 | 27.40524397 | 40.87115895 | 24.38784421 | 48.17082337 | -0.14706166  | 0.341002211 | 0.2568444 |
| <b>B3IHE6</b> | TY-2482_chromosome | + | 4297355 | 4300568 | 154.8595227 | 156.6526764 | 136.4166604 | 76.09901825 | 70.9208152  | 86.60077037 | 0.930462748  | 5.434989871 | 4.7803954 |
| <b>B7LHE8</b> | TY-2482_chromosome | + | 4302969 | 4304027 | 50.72258633 | 67.3068987  | 47.21768905 | 36.45540552 | 24.46289169 | 31.56559694 | 0.716144804  | 2.74041509  | 2.3317334 |
| <b>B7LHF0</b> | TY-2482_chromosome | - | 4304075 | 4304842 | 643.8898415 | 638.9060705 | 629.8007814 | 375.9921184 | 476.9691036 | 400.083645  | 0.61991518   | 2.59900611  | 2.2054214 |
| <b>B7LHF1</b> | TY-2482_chromosome | + | 4304996 | 4305466 | 530.7456095 | 635.2354809 | 593.5597501 | 698.0514199 | 772.7039047 | 637.030889  | -0.306674625 | 0.702263117 | 0.5513125 |
| <b>B7LHF2</b> | TY-2482_chromosome | - | 4305515 | 4307956 | 235.4736062 | 249.7142583 | 248.2646011 | 209.2258746 | 167.3838706 | 169.909269  | 0.382139932  | 1.413029741 | 1.161075  |
| <b>A1A7T5</b> | TY-2482_chromosome | + | 4308034 | 4308771 | 2057.189157 | 2148.378734 | 2247.544261 | 2104.050481 | 2178.664446 | 2182.596492 | 0.007432672  | 0.002892492 | 0.0010807 |
| <b>B7LHF4</b> | TY-2482_chromosome | + | 4308980 | 4309744 | 781.5019255 | 719.6534849 | 808.9060788 | 929.5566765 | 767.0999344 | 823.654339  | -0.116408901 | 0.802222547 | 0.2092607 |
| <b>B7LHF5</b> | TY-2482_chromosome | - | 4309721 | 4310458 | 457.6267262 | 468.7996474 | 466.1098404 | 765.6781469 | 853.7001584 | 705.4339681 | -0.753759519 | 3.558066113 | 3.0579868 |
| <b>B7LHF6</b> | TY-2482_chromosome | - | 4310617 | 4310892 | 395.6859844 | 393.689187  | 345.030653  | 164.7027228 | 216.7811782 | 132.1317472 | 1.094081336  | 6.831263104 | 6.0867893 |
| <b>B7LHF7</b> | TY-2482_chromosome | - | 4310898 | 4311155 | 489.8000017 | 532.2659755 | 457.9733358 | 175.4610822 | 225.0367064 | 98.30655983 | 1.465274603  | 9.616013204 | 8.709484  |
| <b>B7LHF9</b> | TY-2482_chromosome | - | 4312174 | 4312527 | 220.6241159 | 233.5871224 | 198.4679343 | 92.87955712 | 155.9351992 | 73.08606936 | 0.961837461  | 4.652017962 | 4.0575045 |
| <b>B7LHG0</b> | TY-2482_chromosome | - | 4312523 | 4312819 | 95.51090878 | 105.8082983 | 117.7743023 | 44.91508177 | 62.8889752  | 53.96180218 | 1.015656484  | 5.121014498 | 4.4894261 |
| <b>B7LHG1</b> | TY-2482_chromosome | - | 4312906 | 4314642 | 47.53058826 | 74.59893472 | 55.99457365 | 34.27518872 | 31.84417415 | 29.11653194 | 0.775946355  | 3.138265775 | 2.605903  |
| <b>B7LHG3</b> | TY-2482_chromosome | + | 4315443 | 4316495 | 338.8878813 | 297.1863906 | 317.5390504 | 169.7741648 | 221.2564768 | 179.0930709 | 0.778865644  | 3.887512062 | 3.0844126 |
| <b>C8UI55</b> | TY-2482_chromosome | + | 4316495 | 4316944 | 62.7643879  | 55.51826027 | 72.25024802 | 33.48130493 | 35.52080829 | 30.43090175 | 0.981400194  | 3.992883945 | 3.4524641 |
| <b>B7L3Y7</b> | TY-2482_chromosome | + | 4317166 | 4318329 | 40.17430943 | 46.35746477 | 50.38437689 | 13.96095474 | 7.151618945 | 15.50542831 | 1.907047213  | 9.053343643 | 8.1743153 |
| <b>A1A7U7</b> | TY-2482_chromosome | + | 4318245 | 4318940 | 91.21899079 | 104.1444504 | 79.54887322 | 63.6100416  | 61.84285697 | 70.88690361 | 0.436241342  | 1.527938521 | 1.2593514 |
| <b>B7L3Y9</b> | TY-2482_chromosome | - | 4319003 | 4320457 | 6447.784444 | 6658.56571  | 6800.46456  | 13121.55018 | 11268.18495 | 12564.09297 | -0.900829291 | 1.642020886 | 1.3612548 |
| <b>B7L3Z0</b> | TY-2482_chromosome | + | 4320718 | 4321173 | 465.9751441 | 398.1974765 | 474.1987306 | 653.4431682 | 934.7034619 | 933.8076909 | -0.808518531 | 4.673829861 | 4.0763135 |
| <b>B7L3Z1</b> | TY-2482_chromosome | + | 4321268 | 4322509 | 1436.582146 | 1327.664165 | 1535.228333 | 1508.528818 | 1389.594467 | 1540.498417 | -0.007499509 | 0.08401948  | 0.0616629 |
| <b>B7L3Z2</b> | TY-2482_chromosome | + | 4322570 | 4322968 | 1058.073903 | 1153.540448 | 1113.141103 | 798.2740768 | 1052.164973 | 796.2321936 | 0.315249219  | 1.002928492 | 0.8047811 |
| <b>B7L3Z3</b> | TY-2482_chromosome | - | 4323013 | 4324065 | 44.04113616 | 37.72614396 | 53.84940479 | 19.9019051  | 28.24903186 | 31.28442215 | 0.900254841  | 2.062915378 | 2.0005104 |
| <b>B7L3Z4</b> | TY-2482_chromosome | + | 4324353 | 4325453 | 913.1122731 | 850.9299175 | 946.8880922 | 1593.567141 | 1249.403747 | 1405.124257 | -0.643539136 | 2.748707906 | 2.3388052 |
| <b>B7L3Z5</b> | TY-2482_chromosome | + | 4325468 | 4326718 | 1396.146586 | 1480.717984 | 1406.228229 | 2030.543861 | 1962.941975 | 2146.974984 | -0.528049022 | 2.006688982 | 1.6771479 |
| <b>thrW</b>   | TY-2482_chromosome | + | 4326836 | 4326911 | 184.2386813 | 286.1351092 | 251.6601372 | 132.8061842 | 141.1438636 | 99.16738493 | 0.837838511  | 4.665694404 | 4.0693066 |
| <b>D6J782</b> | TY-2482_chromosome | - | 4326973 | 4327284 | 37.97550221 | 43.56942249 | 44.33721596 | 42.97451808 | 42.8438935  | 25.56463264 | 0.104915521  | 0.266222604 | 0.1987204 |
| <b>B3HAL5</b> | TY-2482_chromosome | - | 4328239 | 4328793 | 70.97768174 | 63.28107948 | 82.84159631 | 30.42000712 | 31.00592918 | 18.90141846 | 1.43540077   | 7.820876222 | 7.0152288 |
| <b>B3HAK2</b> | TY-2482_chromosome | + | 4334371 | 4335399 | 77.45769577 | 57.51091235 | 50.38469138 | 27.87580393 | 22.72485469 | 19.99415964 | 1.359640352  | 6.59761086  | 5.8656356 |
| <b>C8THX6</b> | TY-2482_chromosome | + | 4335786 | 4337624 | 112.6462547 | 152.6234079 | 127.3406506 | 63.41158029 | 51.97572293 | 12.93476774 | 1.38760185   | 6.704131209 | 5.966472  |
| <b>E9TCE4</b> | TY-2482_chromosome | + | 4337675 | 4338349 | 129.3298031 | 124.3621291 | 138.7789676 | 79.25665061 | 93.08167068 | 24.82368519 | 0.905658187  | 3.312770171 | 2.8369791 |
| <b>C8THX8</b> | TY-2482_chromosome | - | 4338436 | 4339710 | 61.31371144 | 64.02689981 | 57.96027618 | 17.67298936 | 24.72063976 | 11.02491961 | 1.710733542  | 9.897647459 | 8.9723011 |
| <b>B7L3Z6</b> | TY-2482_chromosome | + | 4340038 | 4341249 | 150.602836  | 100.5535386 | 137.4420193 | 235.0527206 | 191.0976038 | 150.531986  | -0.545411257 | 1.943021941 | 1.6221328 |
| <b>B7L3Z7</b> | TY-2482_chromosome | + | 4341375 | 4342175 | 228.6715768 | 242.4576581 | 267.6111077 | 185.1533958 | 172.0948593 | 92.97953454 | 0.637505887  | 2.615969777 | 2.188378  |
| <b>B7L3Z9</b> | TY-2482_chromosome | + | 4342649 | 4343446 | 83.28006581 | 60.90691526 | 69.88971009 | 35.24796278 | 42.82347429 | 38.20459706 | 0.944881884  | 3.769756481 | 3.2458615 |
| <b>B7L400</b> | TY-2482_chromosome | + | 4343442 | 4345025 | 960.9840429 | 993.7294563 | 887.1447468 | 415.0045938 | 732.8537593 | 496.2605842 | 0.793822719  | 3.444626314 | 2.9555424 |
| <b>B7L405</b> | TY-2482_chromosome | + | 4345871 | 4348000 | 73.62842421 | 104.4771763 | 104.5857455 | 32.47480293 | 36.36140986 | 48.23475829 | 1.290490155  | 6.600601    | 5.8681121 |

|               |                    |   |         |         |             |             |             |             |             |             |              |             |           |
|---------------|--------------------|---|---------|---------|-------------|-------------|-------------|-------------|-------------|-------------|--------------|-------------|-----------|
| <b>B7L406</b> | TY-2482_chromosome | + | 4348462 | 4349016 | 50.16006042 | 38.0142771  | 53.72303339 | 38.39412898 | 29.976576   | 30.42463534 | 0.56762941   | 1.389095691 | 1.1393451 |
| <b>B7L408</b> | TY-2482_chromosome | + | 4349438 | 4350577 | 3630.559861 | 3987.379281 | 4245.502029 | 2709.796687 | 2345.41601  | 471.2901111 | 0.924222603  | 1.773744391 | 1.4751814 |
| <b>B7L409</b> | TY-2482_chromosome | + | 4350645 | 4350965 | 107.3791641 | 140.5204457 | 133.4822397 | 54.72843991 | 49.2850136  | 10.28629706 | 1.547613337  | 7.505800125 | 6.7238258 |
| <b>B7L410</b> | TY-2482_chromosome | + | 4351411 | 4351680 | 375.9878448 | 399.5870721 | 441.9258235 | 319.9298783 | 373.2834781 | 223.0302641 | 0.377601509  | 1.194425605 | 0.9694892 |
| <b>B7L411</b> | TY-2482_chromosome | + | 4351765 | 4352307 | 98.69554514 | 93.4411319  | 103.0853532 | 112.0727233 | 90.05095015 | 83.19659508 | 0.026510524  | 0.084815707 | 0.0622325 |
| <b>B7L412</b> | TY-2482_chromosome | + | 4352914 | 4353906 | 3297.041708 | 3529.111493 | 3849.385616 | 4024.482693 | 3110.766    | 221.3702535 | 0.319413124  | 0.474415277 | 0.3628443 |
| <b>B7L413</b> | TY-2482_chromosome | + | 4353902 | 4354879 | 2280.132852 | 2223.440086 | 2358.422432 | 3150.023594 | 2788.685076 | 210.8521769 | -0.037531549 | 0.119123452 | 0.087349  |
| <b>P71299</b> | TY-2482_chromosome | + | 4355264 | 4355764 | 47.08902883 | 53.07621964 | 42.67861811 | 37.54597262 | 42.88441251 | 24.22732725 | 0.34950184   | 0.967889796 | 0.7754118 |
| <b>B7L415</b> | TY-2482_chromosome | - | 4355734 | 4356687 | 53.85009826 | 54.05018153 | 51.40145603 | 78.25945244 | 61.7727395  | 82.65454724 | -0.485621794 | 1.448660524 | 1.1908877 |
| <b>B7L416</b> | TY-2482_chromosome | - | 4356700 | 4358895 | 82.25662524 | 89.27540414 | 74.36250027 | 160.859902  | 127.2554136 | 196.8094578 | -0.989768667 | 5.083810494 | 4.4550646 |
| <b>B7L417</b> | TY-2482_chromosome | - | 4358895 | 4359848 | 33.93680211 | 24.27843289 | 24.85551313 | 65.96935014 | 38.02009263 | 70.60751045 | -1.027474609 | 3.807193184 | 3.281067  |
| <b>B7L418</b> | TY-2482_chromosome | - | 4359848 | 4360534 | 22.97837387 | 32.10061195 | 26.36001646 | 47.30444719 | 33.51483659 | 58.68534235 | -0.810943312 | 2.185041273 | 1.8361765 |
| <b>B7L419</b> | TY-2482_chromosome | + | 4360952 | 4361563 | 221.1296676 | 262.0752693 | 257.5880734 | 211.7532293 | 219.4275244 | 138.8086113 | 0.199964159  | 1.059827468 | 0.8542587 |
| <b>B7L420</b> | TY-2482_chromosome | - | 4362459 | 4363166 | 98.15088034 | 83.2095023  | 83.68511284 | 68.54807906 | 56.36509059 | 59.30465673 | 0.52000179   | 1.856120219 | 1.5468287 |
| <b>B7L421</b> | TY-2482_chromosome | - | 4363138 | 4364778 | 158.6182115 | 144.8793958 | 149.8194869 | 137.5508329 | 104.548559  | 126.2589643 | 0.298595381  | 0.892038415 | 0.7128837 |
| <b>B7L422</b> | TY-2482_chromosome | - | 4364771 | 4367293 | 117.436804  | 115.9235016 | 110.8045265 | 91.49100481 | 71.79564315 | 88.05771333 | 0.437945129  | 1.665275819 | 1.3806785 |
| <b>B7L423</b> | TY-2482_chromosome | - | 4367322 | 4367987 | 156.368911  | 154.3051858 | 138.4247253 | 85.3560096  | 71.78775926 | 98.3360354  | 0.815295006  | 4.14369128  | 3.9155556 |
| <b>B7L424</b> | TY-2482_chromosome | - | 4368048 | 4368632 | 336.5233116 | 344.8679    | 320.735275  | 252.073754  | 290.3883623 | 235.7528522 | 0.340392611  | 1.123747237 | 0.9093827 |
| <b>B7L426</b> | TY-2482_chromosome | + | 4370072 | 4370296 | 58.01573995 | 100.9057644 | 55.61587311 | 30.48422899 | 31.02166358 | 16.36638882 | 1.208314034  | 5.873411516 | 5.1876555 |
| <b>B7L427</b> | TY-2482_chromosome | - | 4370477 | 4370737 | 51.71274493 | 44.55925891 | 46.7986714  | 60.90926171 | 89.42814598 | 42.79480109 | -0.44396361  | 0.981119422 | 0.7867102 |
| <b>D3GT81</b> | TY-2482_chromosome | - | 4370794 | 4371023 | 10.39489485 | 14.27765262 | 9.731817973 | 30.07168197 | 37.39587142 | 27.86539233 | -1.557241813 | 5.035747678 | 4.4098258 |
| <b>D6JDQ4</b> | TY-2482_chromosome | + | 4372312 | 4374381 | 80.85915206 | 74.99553976 | 72.48109905 | 59.47357346 | 42.6733632  | 50.05168963 | 0.558201018  | 1.941313308 | 1.6206233 |
| <b>B7L429</b> | TY-2482_chromosome | - | 4376695 | 4377582 | 123.1050562 | 158.5312983 | 148.6314101 | 135.8498506 | 123.8365092 | 73.13636156 | 0.248756965  | 0.957279824 | 0.7665769 |
| <b>B7L432</b> | TY-2482_chromosome | - | 4379092 | 4380414 | 85.05255669 | 93.01399718 | 104.5709431 | 142.8722557 | 92.64839207 | 139.2024307 | -0.40253335  | 1.189433591 | 0.9654545 |
| <b>B7L433</b> | TY-2482_chromosome | + | 4380640 | 4381491 | 24.49738205 | 32.37635176 | 27.69546576 | 28.49998115 | 28.27320418 | 16.30206755 | 0.094615133  | 0.276613151 | 0.2069938 |
| <b>B7L434</b> | TY-2482_chromosome | + | 4382021 | 4382737 | 692.2348714 | 805.9539856 | 848.6242415 | 1914.349511 | 1212.922911 | 1574.804744 | -1.047162833 | 5.263149083 | 4.6191632 |
| <b>B7L435</b> | TY-2482_chromosome | + | 4382751 | 4384175 | 919.4932071 | 1237.22051  | 1111.207865 | 3613.471115 | 2027.377145 | 2866.721497 | -1.483820337 | 5.880979913 | 5.1942999 |
| <b>B7L436</b> | TY-2482_chromosome | + | 4384171 | 4384863 | 360.3032689 | 366.5161367 | 427.4634903 | 1393.933553 | 956.2894319 | 1353.528293 | -1.663201967 | 14.60729254 | 13.484505 |
| <b>C8TI04</b> | TY-2482_chromosome | - | 4384824 | 4385033 | 73.29759221 | 78.98719631 | 65.10418023 | 194.3500006 | 170.994555  | 220.7147199 | -1.453135645 | 11.05418175 | 10.076981 |
| <b>B7L437</b> | TY-2482_chromosome | - | 4384943 | 4385137 | 26.19537766 | 29.79322985 | 21.48741442 | 69.14020465 | 65.5353178  | 55.54455572 | -1.388414698 | 6.364565408 | 5.6482194 |
| <b>B7L439</b> | TY-2482_chromosome | - | 4385993 | 4387660 | 1048.22852  | 1210.287621 | 1249.339244 | 2191.623892 | 1668.878192 | 2384.82888  | -0.830025752 | 3.998491125 | 3.4577409 |
| <b>B7L441</b> | TY-2482_chromosome | - | 4387677 | 4389146 | 919.7316296 | 889.7526587 | 1067.907236 | 2176.887313 | 1878.206685 | 2776.668868 | -1.168723522 | 8.059884785 | 7.2349599 |
| <b>B7L442</b> | TY-2482_chromosome | - | 4389163 | 4389747 | 387.4013644 | 361.3736017 | 390.2484086 | 732.537995  | 804.4541763 | 954.7491898 | -1.064144495 | 7.154094902 | 6.3890653 |
| <b>Q0TKV8</b> | TY-2482_chromosome | + | 4389664 | 4389876 | 101.6688384 | 107.7534908 | 98.91669516 | 161.8813414 | 195.7074272 | 189.3762165 | -0.823433899 | 4.404654174 | 3.8345069 |
| <b>B7L443</b> | TY-2482_chromosome | + | 4389876 | 4391196 | 322.4322228 | 299.0971926 | 287.6919908 | 1357.382493 | 1493.382493 | 1656.10195  | -2.275396827 | 29.06388545 | 27.583517 |
| <b>B7L444</b> | TY-2482_chromosome | + | 4392416 | 4396462 | 331.0848268 | 380.7504603 | 380.397309  | 228.6242078 | 204.7044449 | 226.2383058 | 0.70902041   | 3.439881519 | 2.951677  |
| <b>B7L445</b> | TY-2482_chromosome | + | 4396607 | 4397692 | 178.6909893 | 156.2769963 | 205.0206574 | 213.7725295 | 184.7156744 | 168.6924166 | -0.045515431 | 0.125621587 | 0.0925136 |
| <b>B7L446</b> | TY-2482_chromosome | - | 4397740 | 4398669 | 232.8340453 | 191.5692822 | 191.2513587 | 63.24199374 | 84.69133969 | 84.02519908 | 1.470852354  | 10.88160083 | 9.9142203 |
| <b>B7L448</b> | TY-2482_chromosome | + | 4399516 | 4400118 | 59.00464664 | 55.14742616 | 67.5776651  | 29.11290551 | 17.13671786 | 31.25266356 | 1.274506273  | 5.655679788 | 4.9862287 |
| <b>B7L450</b> | TY-2482_chromosome | + | 4401014 | 4402558 | 15.24236293 | 37.21174871 | 23.00764351 | 53.91884324 | 27.12526483 | 39.53500642 | -0.905622599 | 1.449586634 | 1.1914692 |
| <b>B7L451</b> | TY-2482_chromosome | + | 4402561 | 4403976 | 25.25806152 | 30.48131332 | 29.78116193 | 44.40847744 | 32.69422871 | 33.10222625 | -0.429486889 | 0.726780184 | 0.5724466 |
| <b>B7L453</b> | TY-2482_chromosome | + | 4405082 | 4406461 | 25.68104596 | 16.84446379 | 19.66471943 | 37.40782409 | 24.50276909 | 21.44769109 | -0.43703625  | 0.709144676 | 0.5573851 |
| <b>B7L4X8</b> | TY-2482_chromosome | + | 4408444 | 4409940 | 44.1091907  | 50.32498314 | 38.67253    | 35.44571966 | 33.64027584 | 36.78665383 | 0.274889888  | 0.659613957 | 0.5158773 |
| <b>B7L4X9</b> | TY-2482_chromosome | + | 4409936 | 4410904 | 98.79424755 | 92.9669148  | 89.65240679 | 35.22122014 | 37.27758444 | 45.75680697 | 1.28560947   | 7.513289403 | 6.7301616 |
| <b>B7L4Y0</b> | TY-2482_chromosome | + | 4410874 | 4411857 | 145.1122155 | 156.0229612 | 124.4437942 | 63.28943465 | 89.29920551 | 73.74827116 | 0.883920271  | 4.72435537  | 4.1219146 |
| <b>B7L4Y1</b> | TY-2482_chromosome | + | 4411947 | 4412993 | 531.0657207 | 504.937124  | 472.5284577 | 802.4841315 | 713.3877826 | 896.9590317 | -0.666958614 | 3.070347143 | 2.622122  |
| <b>B7L4Y3</b> | TY-2482_chromosome | + | 4414466 | 4414708 | 64.30831124 | 71.09284837 | 57.17182705 | 62.79542815 | 6.295784286 | 6.781709785 | 2.795408581  | 19.89541803 | 1.610821  |
| <b>B7L4Y4</b> | TY-2482_chromosome | - | 4414731 | 4415399 | 51.11339718 | 35.2571531  | 42.84859719 | 40.68924141 | 38.18107935 | 43.31939623 | 0.153241684  | 0.127711232 | 0.0934769 |
| <b>B7L4Y5</b> | TY-2482_chromosome | + | 4415546 | 4415818 | 383.1932373 | 584.6124682 | 487.9072054 | 330.8997696 | 582.1040448 | 98.85921306 | 0.343923961  | 0.852961736 | 0.6789115 |
| <b>B7L4Y6</b> | TY-2482_chromosome | - | 4415925 | 4417508 | 38.59037873 | 50.85794073 | 51.70616482 | 72.7613267  | 51.78940595 | 52.87546282 | -0.402375515 | 0.760075891 | 0.6020708 |
| <b>B7L4Z0</b> | TY-2482_chromosome | + | 4421375 | 4423258 | 59.00705083 | 64.01492406 | 60.02275744 | 52.75865342 | 39.94505943 | 49.92211687 | 0.328737176  | 0.901101954 | 0.7198897 |
| <b>B7L4Z2</b> | TY-2482_chromosome | + | 4423687 | 4424943 | 447.913122  | 523.4971461 | 388.454745  | 157.343002  | 167.4195427 | 194.4216503 | 1.344401965  | 9.976441099 | 9.0454492 |
| <b>B7L4Z3</b> | TY-2482_chromosome | + | 4424936 | 4426216 | 1070.923529 | 1061.249446 | 1023.918259 | 603.4869507 | 551.4152046 | 665.4643836 | 0.802864081  | 4.368160882 | 3.8001304 |
| <b>B7L4Z4</b> | TY-2482_chromosome | - | 4426262 | 4427158 | 111.9255041 | 66.99532065 | 83.01479827 | 58.79374495 | 38.0758356  | 55.10524024 | 0.854958834  | 2.917718979 | 2.486517  |
| <b>B7L4Z5</b> | TY-2482_chromosome | + | 4427268 | 4427924 | 20.86818987 | 20.98684828 | 23.19478147 | 29.6246952  | 28.2048255  | 26.43909153 | -0.372364781 | 0.69999866  | 0.5497211 |
| <b>B7L4Z6</b> | TY-2482_chromosome | + | 4427958 | 4428425 | 27.08472498 | 21.42504598 | 22.31081501 | 36.98832819 | 32.74849636 | 29.17469462 | -0.484477451 | 1.051493617 | 0.8468404 |
| <b>B7L4Z7</b> | TY-2482_chromosome | + | 4428461 | 4429612 | 45.58100024 | 42.11486453 | 49.66471236 | 44.59744428 | 54.71844259 | 35.93185941 | 0.033468763  | 0.015110925 | 0.0098455 |

|               |                    |   |         |         |             |             |             |             |             |             |              |             |           |
|---------------|--------------------|---|---------|---------|-------------|-------------|-------------|-------------|-------------|-------------|--------------|-------------|-----------|
| <b>B7L500</b> | TY-2482_chromosome | - | 4431703 | 4434774 | 143.447048  | 183.1333158 | 133.6749607 | 238.151834  | 140.8357837 | 239.0522924 | -0.519921069 | 1.19763302  | 0.972377  |
| <b>B7L501</b> | TY-2482_chromosome | - | 4434900 | 4435979 | 185.4408727 | 168.6580977 | 201.5812159 | 716.9623083 | 367.4429241 | 475.1902594 | -1.523647846 | 9.064631763 | 8.1834374 |
| <b>B7L502</b> | TY-2482_chromosome | - | 4436059 | 4437003 | 48.56059914 | 42.59331838 | 55.72386096 | 67.62734474 | 64.58131382 | 69.67712277 | -0.397990491 | 1.287836192 | 1.0506977 |
| <b>B7L505</b> | TY-2482_chromosome | + | 4439693 | 4440571 | 44.09690827 | 41.8347355  | 46.29080675 | 56.20685194 | 27.06822569 | 60.01348755 | -0.089141786 | 0.136987271 | 0.1006098 |
| <b>B7L506</b> | TY-2482_chromosome | + | 4440584 | 4441390 | 46.75364411 | 27.86619248 | 34.83637271 | 44.1785879  | 28.03509795 | 54.65922833 | -0.080866105 | 0.270472558 | 0.2023029 |
| <b>B7L507</b> | TY-2482_chromosome | + | 4441390 | 4442337 | 36.12796756 | 62.69007581 | 61.08340128 | 52.52513333 | 41.74114484 | 62.7537506  | -0.006174827 | 0.012589169 | 0.0081495 |
| <b>B7L508</b> | TY-2482_chromosome | + | 4442337 | 4443347 | 52.37199567 | 42.80792974 | 56.33042704 | 80.98942083 | 47.1015627  | 94.12503893 | -0.46822262  | 1.393284451 | 1.1428783 |
| <b>B7L509</b> | TY-2482_chromosome | + | 4443526 | 4444734 | 79.83611231 | 87.70446955 | 95.26841629 | 42.96830817 | 40.83251706 | 70.2664175  | 0.849223049  | 2.903789725 | 2.4746375 |
| <b>B7L510</b> | TY-2482_chromosome | + | 4444839 | 4445375 | 319.8151496 | 408.0018452 | 359.1193824 | 113.7672068 | 89.98611452 | 115.5960838 | 1.712539381  | 15.62689244 | 14.463091 |
| <b>B7L512</b> | TY-2482_chromosome | - | 4445608 | 4446438 | 244.0160541 | 189.766864  | 220.5131473 | 209.0167291 | 173.7361285 | 201.2306648 | 0.208627215  | 0.383141503 | 0.2907045 |
| <b>B7L513</b> | TY-2482_chromosome | - | 4446534 | 4447640 | 660.3626643 | 656.7808676 | 626.4396684 | 946.926629  | 869.9297674 | 1066.68753  | -0.558918714 | 2.424889742 | 2.0502004 |
| <b>Q1RF15</b> | TY-2482_chromosome | + | 4447720 | 4448019 | 162.8328594 | 192.373566  | 181.5824157 | 217.2670473 | 204.6928656 | 249.6930515 | -0.331437003 | 0.943275824 | 0.755076  |
| <b>B7L515</b> | TY-2482_chromosome | - | 4448139 | 4448909 | 30.60496671 | 31.1225067  | 32.38680017 | 18.87884244 | 26.51184632 | 16.11232191 | 0.603065624  | 1.430355144 | 1.1760142 |
| <b>B7NJD4</b> | TY-2482_chromosome | + | 4454592 | 4455374 | 64.9002177  | 78.77086503 | 69.25252572 | 51.44129309 | 42.71985216 | 44.82486464 | 0.549003968  | 1.996589889 | 1.6686715 |
| <b>B7L523</b> | TY-2482_chromosome | - | 4455486 | 4456457 | 1719.360669 | 1520.87007  | 1692.239224 | 2747.006152 | 2486.169149 | 3146.623389 | -0.709785332 | 1.659892094 | 1.3769409 |
| <b>B7L524</b> | TY-2482_chromosome | + | 4456981 | 4459866 | 286.5636444 | 255.6292488 | 255.3714089 | 115.1385228 | 124.7962455 | 75.64062104 | 1.296863632  | 0.063902098 | 8.1834309 |
| <b>B7L526</b> | TY-2482_chromosome | - | 4460584 | 4461738 | 227.4792952 | 189.4283664 | 215.9276782 | 455.0244065 | 402.1362015 | 536.3761188 | -1.070108023 | 7.089297245 | 6.3301124 |
| <b>B7L527</b> | TY-2482_chromosome | + | 4461876 | 4462067 | 70.75088982 | 98.60368427 | 83.15161857 | 30.6138833  | 41.04771005 | 31.74035966 | 1.224291609  | 6.578112516 | 5.8481858 |
| <b>B7L528</b> | TY-2482_chromosome | + | 4462090 | 4463307 | 177.9208506 | 175.7015587 | 191.5867036 | 238.028411  | 255.6763266 | 319.2458453 | -0.511724784 | 2.236986418 | 1.88216   |
| <b>B7L529</b> | TY-2482_chromosome | + | 4463323 | 4464414 | 334.8905402 | 368.0153801 | 363.8287946 | 311.2191393 | 277.4609352 | 358.826084  | 0.180107005  | 0.39153553  | 0.2966714 |
| <b>B7L530</b> | TY-2482_chromosome | - | 4464479 | 4464784 | 34.36273663 | 44.19253156 | 27.98033881 | 54.46606899 | 97.55360319 | 77.61105958 | -1.160775015 | 4.453212578 | 3.8780856 |
| <b>B7L531</b> | TY-2482_chromosome | + | 4464912 | 4465253 | 242.0752285 | 302.4731654 | 264.0147669 | 190.1380784 | 276.8800179 | 168.9207657 | 0.283450542  | 0.91118279  | 0.7278623 |
| <b>B7L532</b> | TY-2482_chromosome | - | 4465283 | 4466374 | 1819.462273 | 1798.263094 | 1862.551868 | 2117.219817 | 2259.69343  | 2051.185968 | -0.226058083 | 0.429940657 | 0.3279819 |
| <b>P71314</b> | TY-2482_chromosome | - | 4466689 | 4466937 | 298.9309117 | 349.5964537 | 336.7665341 | 41.26588848 | 51.06608515 | 35.8503154  | 2.900379133  | 37.2932968  | 36.629586 |
| <b>B7L534</b> | TY-2482_chromosome | + | 4466837 | 4467094 | 574.9528353 | 658.4197025 | 590.8021755 | 78.68388243 | 93.8254341  | 72.63120014 | 2.848528973  | 37.33632066 | 35.663747 |
| <b>C8U269</b> | TY-2482_chromosome | + | 4467198 | 4468610 | 610.9729787 | 628.1955901 | 586.155772  | 152.7864141 | 194.8751388 | 147.6329247 | 1.863056284  | 17.79959987 | 16.571618 |
| <b>B7L539</b> | TY-2482_chromosome | + | 4468732 | 4469049 | 171.9480944 | 182.4907553 | 170.9108513 | 109.2245091 | 175.8871193 | 105.7144034 | 0.409436606  | 1.268752414 | 1.0339618 |
| <b>B7L540</b> | TY-2482_chromosome | + | 4469154 | 4470266 | 61.61765543 | 38.50268289 | 53.51485395 | 82.24848336 | 67.26002332 | 80.174485   | -0.49246554  | 1.75360572  | 1.4589986 |
| <b>B7L541</b> | TY-2482_chromosome | - | 4470289 | 4471095 | 668.5512644 | 697.5700541 | 636.3047822 | 1135.29551  | 1030.064709 | 1430.873093 | -0.829518768 | 4.597154181 | 4.0082159 |
| <b>D8CGU2</b> | TY-2482_chromosome | + | 4471095 | 4471670 | 238.9365987 | 357.6332211 | 274.4873722 | 319.1491551 | 334.9311426 | 300.1325957 | -0.242915131 | 0.278552348 | 0.2081504 |
| <b>B7L543</b> | TY-2482_chromosome | + | 4471856 | 4472377 | 624.4853255 | 623.134678  | 574.8830484 | 422.4032681 | 409.5322537 | 369.9141414 | 0.56524492   | 2.541268865 | 2.1526021 |
| <b>Q1RFF5</b> | TY-2482_chromosome | - | 4472373 | 4472699 | 569.7092031 | 665.9083422 | 580.2015378 | 335.9427692 | 492.5861997 | 286.0925297 | 0.642786794  | 2.772382606 | 2.3587963 |
| <b>B7L545</b> | TY-2482_chromosome | + | 4472879 | 4473553 | 236.3579519 | 209.8255367 | 241.099006  | 414.5555025 | 424.145205  | 328.0156455 | -0.758905888 | 3.577293623 | 3.0757069 |
| <b>B7L546</b> | TY-2482_chromosome | + | 4473628 | 4473909 | 694.5869065 | 795.0814153 | 735.4502806 | 569.490295  | 925.7783891 | 596.3781482 | 0.07032579   | 0.161527446 | 0.1184472 |
| <b>B7L548</b> | TY-2482_chromosome | - | 4474616 | 4475524 | 433.0125885 | 397.6658201 | 446.4285277 | 941.0504399 | 926.4106907 | 964.313479  | -1.114313781 | 7.943495946 | 7.1280057 |
| <b>B7L549</b> | TY-2482_chromosome | + | 4475649 | 4476554 | 426.0079081 | 496.8367716 | 521.1388712 | 346.8730873 | 260.1158993 | 382.4424824 | 0.551696405  | 1.932755589 | 1.6124637 |
| <b>B7L550</b> | TY-2482_chromosome | - | 4476703 | 4477884 | 213.8936097 | 223.4658408 | 195.202921  | 181.6725508 | 209.3504057 | 199.9612234 | 0.083416497  | 0.192051443 | 0.1416595 |
| <b>B7L551</b> | TY-2482_chromosome | - | 4478013 | 4481153 | 656.7369756 | 555.1588266 | 625.2728495 | 908.2297787 | 726.0660227 | 1084.859681 | -0.497505237 | 2.192768143 | 1.8436495 |
| <b>B7L552</b> | TY-2482_chromosome | - | 4481153 | 4482352 | 195.0191598 | 240.4453025 | 197.2132699 | 278.4571967 | 262.964848  | 284.1149189 | -0.444524699 | 1.256129016 | 1.0226435 |
| <b>B7L553</b> | TY-2482_chromosome | + | 4482542 | 4483228 | 108.4800962 | 103.3422972 | 102.918849  | 130.7226679 | 131.0580394 | 121.1851139 | -0.289335423 | 0.835277814 | 0.6642008 |
| <b>B7L688</b> | TY-2482_chromosome | + | 4483289 | 4484581 | 120.3963377 | 111.6375859 | 125.5510144 | 150.0274988 | 142.0015799 | 109.6487539 | -0.183399828 | 0.382742112 | 0.2904291 |
| <b>B7L634</b> | TY-2482_chromosome | + | 4484991 | 4486307 | 1029.86054  | 900.1901463 | 1013.527599 | 544.7743768 | 594.2444756 | 671.9965038 | 0.771292684  | 3.489290367 | 2.9957824 |
| <b>B7L635</b> | TY-2482_chromosome | + | 4486386 | 4487756 | 402.6390919 | 295.7189685 | 349.8939259 | 568.04042   | 530.5029993 | 605.0323737 | -0.629005461 | 3.145498307 | 2.8667296 |
| <b>B7L636</b> | TY-2482_chromosome | + | 4487915 | 4489729 | 609.2270983 | 735.8739409 | 719.1008515 | 746.4081041 | 668.74311   | 1046.481269 | -0.223084551 | 0.625925201 | 0.4882406 |
| <b>B7L637</b> | TY-2482_chromosome | - | 4489740 | 4490318 | 195.9211864 | 171.5816049 | 216.1695751 | 345.2803889 | 340.3079957 | 399.6928089 | -0.816315592 | 4.943485911 | 4.325533  |
| <b>B7L638</b> | TY-2482_chromosome | + | 4490411 | 4491478 | 404.6563258 | 398.9861169 | 358.2695449 | 911.6224626 | 767.0712091 | 953.609307  | -1.192589698 | 7.869825292 | 7.0586688 |
| <b>B7L639</b> | TY-2482_chromosome | + | 4491537 | 4492661 | 3279.171851 | 3356.614796 | 3580.578431 | 4084.015618 | 4442.894871 | 4302.070414 | -0.3094455   | 4.36519033  | 0.3331138 |
| <b>B7L640</b> | TY-2482_chromosome | + | 4492687 | 4493016 | 4552.78302  | 4592.937761 | 4762.987103 | 4169.305531 | 5265.687243 | 4069.482304 | 0.048107584  | 0.041545536 | 0.0285056 |
| <b>B7L641</b> | TY-2482_chromosome | + | 4493047 | 4494891 | 6235.53433  | 5899.051123 | 5963.839229 | 10136.57151 | 9548.217411 | 10348.55946 | -0.719660524 | 1.239267405 | 1.0082186 |
| <b>B7L642</b> | TY-2482_chromosome | + | 4494905 | 4495873 | 4502.102995 | 4044.805593 | 4191.104138 | 5214.313969 | 5460.322328 | 5290.129962 | -0.304119147 | 0.221580788 | 0.3211836 |
| <b>B7L643</b> | TY-2482_chromosome | + | 4496005 | 4496349 | 416.3284284 | 476.1837811 | 486.7360141 | 85.62198061 | 128.501049  | 88.45224953 | 2.186137378  | 22.39172978 | 21.05253  |
| <b>B7L644</b> | TY-2482_chromosome | - | 4496532 | 4497413 | 2361.659739 | 2328.824798 | 2376.843428 | 8208.960317 | 8889.417705 | 8237.158485 | -1.834882939 | 5.739656271 | 5.0639369 |
| <b>C8TJ02</b> | TY-2482_chromosome | - | 4497715 | 4498251 | 104.7966155 | 95.75945655 | 94.95220487 | 89.01406255 | 130.3448888 | 79.4166283  | -0.016978955 | 0.016101627 | 0.0104508 |
| <b>B7L647</b> | TY-2482_chromosome | + | 4498402 | 4498848 | 869.8773393 | 768.4053091 | 790.8646205 | 625.0893982 | 582.3535772 | 724.5875613 | 0.372932926  | 0.994896003 | 0.7982478 |
| <b>B7L648</b> | TY-2482_chromosome | + | 4498855 | 4499955 | 1918.293883 | 1731.792413 | 1834.774279 | 1262.814101 | 993.602408  | 1585.986071 | 0.57291129   | 1.768803    | 1.4708074 |
| <b>A1A885</b> | TY-2482_chromosome | + | 4499951 | 4500514 | 2399.107402 | 2285.165299 | 2318.035775 | 1541.263773 | 1511.562216 | 1639.150437 | 0.595448185  | 1.594548105 | 1.3200933 |
| <b>A1A886</b> | TY-2482_chromosome | - | 4500510 | 4501040 | 2071.73307  | 1709.047234 | 1826.774231 | 1671.913384 | 1723.632018 | 1762.881117 | 0.162912073  | 0.256417649 | 0.1906903 |

|               |                    |   |         |         |             |             |             |             |             |             |              |             |           |
|---------------|--------------------|---|---------|---------|-------------|-------------|-------------|-------------|-------------|-------------|--------------|-------------|-----------|
| <b>B7L651</b> | TY-2482_chromosome | + | 4501034 | 4502008 | 543.0070334 | 485.24549   | 529.535348  | 640.2972506 | 591.4726992 | 677.3934376 | -0.256807548 | 0.813257935 | 0.6472309 |
| <b>B7L652</b> | TY-2482_chromosome | + | 4501989 | 4502504 | 380.6618597 | 368.6872061 | 374.9861928 | 437.3921758 | 419.5057905 | 436.7765708 | -0.196341768 | 0.499442315 | 0.3840406 |
| <b>B7L653</b> | TY-2482_chromosome | - | 4502564 | 4503535 | 595.2668168 | 562.339186  | 620.7284457 | 855.8213915 | 739.7918754 | 858.9874176 | -0.441166841 | 1.680422923 | 1.3943572 |
| <b>B7L654</b> | TY-2482_chromosome | - | 4503593 | 4505452 | 1246.111296 | 1008.66821  | 1125.667656 | 3164.300608 | 2487.045229 | 3184.904149 | -1.344606    | 6.410803606 | 5.6919745 |
| <b>B7L655</b> | TY-2482_chromosome | - | 4505480 | 4506376 | 881.341284  | 640.7340845 | 708.9266197 | 1063.532946 | 1253.019934 | 1687.557897 | -0.914650516 | 5.186917294 | 4.55      |
| <b>B7L656</b> | TY-2482_chromosome | - | 4506379 | 4506618 | 359.8842306 | 317.4346338 | 311.4470301 | 424.7234094 | 435.8866858 | 483.9580433 | -0.411700479 | 1.526260423 | 1.2580264 |
| <b>B7L657</b> | TY-2482_chromosome | + | 4506824 | 4508269 | 655.378099  | 551.9517569 | 526.5854113 | 1533.174663 | 1650.813776 | 1848.182705 | -1.494827646 | 12.17957299 | 11.14554  |
| <b>B7L658</b> | TY-2482_chromosome | - | 4508329 | 4508916 | 602.644759  | 643.7944337 | 643.7643794 | 802.5564433 | 768.0595001 | 784.1356935 | -0.328564781 | 0.956325617 | 0.7659178 |
| <b>B7L659</b> | TY-2482_chromosome | - | 4508882 | 4509790 | 702.8280508 | 749.6035787 | 781.1738272 | 748.7050646 | 643.3077011 | 804.911554  | 0.035070499  | 0.04216144  | 0.0287291 |
| <b>B7L660</b> | TY-2482_chromosome | + | 4509958 | 4510446 | 2888.803059 | 3070.162402 | 3028.5013   | 2509.239765 | 2895.874204 | 2332.868856 | 0.19748369   | 0.266434455 | 0.1988211 |
| <b>B7L661</b> | TY-2482_chromosome | - | 4510580 | 4511941 | 228.8667237 | 241.2650115 | 201.7380146 | 162.9249182 | 225.7510795 | 233.8744452 | 0.126455038  | 0.210377454 | 0.1556898 |
| <b>B7L663</b> | TY-2482_chromosome | - | 4513343 | 4513882 | 148.9269958 | 122.6164058 | 146.6732189 | 63.52614213 | 59.06777428 | 81.15385019 | 1.123840293  | 6.34664079  | 5.631284  |
| <b>B7L664</b> | TY-2482_chromosome | - | 4513869 | 4514243 | 145.0114587 | 144.6957208 | 155.9193175 | 67.87986937 | 49.93665464 | 65.6513574  | 1.285049006  | 9.204506036 | 8.3158391 |
| <b>B5Z3T4</b> | TY-2482_chromosome | - | 4514365 | 4515297 | 21607.12453 | 24788.93987 | 23763.85304 | 10192.74422 | 8691.86466  | 8242.593146 | 1.311326167  | 3.032613076 | 2.588905  |
| <b>B7L666</b> | TY-2482_chromosome | - | 4515267 | 4515593 | 9413.680918 | 10171.55994 | 9937.195622 | 4815.547379 | 3488.093997 | 4245.474522 | 1.195815237  | 2.813209315 | 2.3946625 |
| <b>B7L667</b> | TY-2482_chromosome | - | 4515596 | 4516207 | 14253.01975 | 13930.58009 | 15003.27464 | 7239.370619 | 5695.903555 | 6768.780327 | 1.134986305  | 2.346523401 | 1.9803192 |
| <b>B7L668</b> | TY-2482_chromosome | - | 4516200 | 4518188 | 33497.99275 | 31173.22541 | 33019.01893 | 20507.08781 | 16004.03067 | 21256.12436 | 0.80237208   | 1.166008633 | 0.9477294 |
| <b>B7L669</b> | TY-2482_chromosome | - | 4518213 | 4519157 | 12539.80231 | 11820.98092 | 12267.14933 | 7776.165379 | 7348.59277  | 8981.398811 | 0.640279868  | 0.902847276 | 0.721057  |
| <b>B7L670</b> | TY-2482_chromosome | - | 4519620 | 4521092 | 715.9419555 | 558.0716904 | 627.8243583 | 616.980983  | 687.0756812 | 773.2877803 | -0.042422122 | 0.266526668 | 0.1988211 |
| <b>B7L671</b> | TY-2482_chromosome | - | 4521139 | 4521714 | 800.3623437 | 741.8363577 | 661.9046675 | 560.9811035 | 644.2708152 | 830.870895  | 0.166878925  | 0.228253964 | 0.1690096 |
| <b>B7L672</b> | TY-2482_chromosome | + | 4522019 | 4522333 | 2659.973213 | 2994.55532  | 2587.262295 | 986.4046238 | 1895.132173 | 913.7765366 | 1.075265568  | 3.682912948 | 3.1678301 |
| <b>Q1RFA2</b> | TY-2482_chromosome | - | 4522266 | 4522685 | 3612.078137 | 3919.085915 | 3127.158018 | 3480.038937 | 3781.348079 | 2914.489665 | -0.011831246 | 0.068666936 | 0.0493055 |
| <b>B7L673</b> | TY-2482_chromosome | + | 4522680 | 4523975 | 19573.91789 | 19115.56099 | 19974.12076 | 31567.70099 | 26915.61415 | 29436.89628 | -0.585838751 | 0.806702295 | 0.641372  |
| <b>B7L674</b> | TY-2482_chromosome | + | 4524224 | 4524844 | 4677.755157 | 4158.754819 | 4922.901999 | 6059.794927 | 5067.079178 | 5847.841792 | -0.266497685 | 0.378716791 | 0.2873381 |
| <b>E0QWE8</b> | TY-2482_chromosome | - | 4524749 | 4524946 | 1726.809691 | 1551.743682 | 1739.147359 | 2057.882722 | 1566.083992 | 1847.114691 | -0.112789255 | 0.261796272 | 0.1949508 |
| <b>B7L675</b> | TY-2482_chromosome | + | 4524973 | 4526244 | 7562.880336 | 7153.869821 | 7908.409864 | 12952.74955 | 10583.78833 | 13191.4803  | -0.672917714 | 1.119894846 | 0.905842  |
| <b>B7L676</b> | TY-2482_chromosome | + | 4526435 | 4528786 | 6710.50639  | 5896.91507  | 6105.761004 | 16240.97811 | 13107.35384 | 16668.6243  | -1.274977904 | 2.911780959 | 2.4810923 |
| <b>B7L677</b> | TY-2482_chromosome | + | 4528998 | 4529267 | 9303.598037 | 11710.74551 | 10482.51601 | 5817.98851  | 9948.981536 | 6022.050771 | 0.493270713  | 0.729401273 | 0.5743905 |
| <b>B7L678</b> | TY-2482_chromosome | + | 4529462 | 4531330 | 4175.219713 | 3872.247268 | 4167.443695 | 7420.551646 | 5849.689182 | 7385.685869 | -0.739117998 | 1.340357172 | 1.0974856 |
| <b>B7L679</b> | TY-2482_chromosome | + | 4531484 | 4531852 | 51.42118482 | 63.39188212 | 56.75048037 | 77.46749198 | 70.92351569 | 84.03377455 | -0.468251184 | 1.324740809 | 1.0833648 |
| <b>B7L680</b> | TY-2482_chromosome | + | 4531949 | 4532344 | 53.02422712 | 49.90485998 | 60.291768   | 59.39833215 | 40.82108242 | 56.43369569 | 0.08571324   | 0.086961889 | 0.0636024 |
| <b>B7L681</b> | TY-2482_chromosome | - | 4532402 | 4533094 | 291.3500499 | 357.4530637 | 367.9713034 | 445.7056272 | 524.2603852 | 457.9602157 | -0.499934987 | 1.729051479 | 1.4381787 |
| <b>B7L682</b> | TY-2482_chromosome | - | 4533162 | 4534859 | 172.747742  | 175.0233456 | 166.2728974 | 338.9049541 | 307.5363187 | 348.5303356 | -0.960054392 | 5.730073631 | 5.0552553 |
| <b>D3GV76</b> | TY-2482_chromosome | + | 4534947 | 4535774 | 561.7333705 | 515.6610753 | 513.5431385 | 310.8915932 | 420.571352  | 342.2000186 | 0.593336779  | 2.209380185 | 1.8588123 |
| <b>B7L684</b> | TY-2482_chromosome | + | 4535702 | 4536385 | 459.2843504 | 440.3634998 | 398.5311873 | 294.4623047 | 389.6045035 | 338.1586675 | 0.354275383  | 1.012417908 | 0.8132181 |
| <b>B7L685</b> | TY-2482_chromosome | + | 4536418 | 4538187 | 747.4032522 | 578.5298759 | 619.8023624 | 806.8741495 | 938.3162513 | 867.0280246 | -0.371350483 | 1.475226431 | 1.2136471 |
| <b>B7L686</b> | TY-2482_chromosome | + | 4538183 | 4539961 | 436.008321  | 432.7300129 | 415.8379792 | 446.9177322 | 598.0570939 | 443.6649121 | -0.216691976 | 0.515848994 | 0.3967077 |
| <b>B7L689</b> | TY-2482_chromosome | + | 4540513 | 4541796 | 90.36913102 | 95.44160607 | 100.4631301 | 94.95336709 | 124.8010407 | 94.96902445 | -0.129663125 | 0.289014165 | 0.2158056 |
| <b>B7L690</b> | TY-2482_chromosome | - | 4541851 | 4542708 | 327.4233014 | 340.3341065 | 368.5741631 | 418.7372619 | 467.7811264 | 477.4601446 | -0.363760836 | 1.277178569 | 1.0412911 |
| <b>B7L691</b> | TY-2482_chromosome | + | 4542926 | 4543495 | 1430.443476 | 1568.538784 | 1617.037905 | 1575.07427  | 2093.233891 | 1773.535753 | -0.220953237 | 0.596388657 | 0.4636407 |
| <b>B7L692</b> | TY-2482_chromosome | - | 4543532 | 4543918 | 129.4083337 | 116.872612  | 130.7995397 | 107.9228673 | 113.8551577 | 72.95493742 | 0.335672834  | 1.020463358 | 0.8197556 |
| <b>B7MDX7</b> | TY-2482_chromosome | + | 4543822 | 4544157 | 3017.602087 | 816.3624307 | 186.3573087 | 1085.132817 | 10507.12619 | 298.9810374 | -1.473757495 | 1.288629059 | 1.051026  |
| <b>ffs</b>    | TY-2482_chromosome | + | 4543995 | 4544108 | 2990.708953 | 800.9405915 | 173.1535843 | 1059.514278 | 10485.29225 | 288.4530553 | -1.485551779 | 1.287411953 | 1.0506977 |
| <b>B7L693</b> | TY-2482_chromosome | + | 4544219 | 4544569 | 80.04634905 | 79.75094708 | 74.46864291 | 46.05231998 | 78.44330937 | 58.00695301 | 0.381785938  | 0.898164328 | 0.7176737 |
| <b>B7L694</b> | TY-2482_chromosome | - | 4544617 | 4546164 | 605.0399968 | 574.8522514 | 586.247604  | 288.650785  | 386.0112117 | 287.0977902 | 0.88896936   | 4.625851496 | 4.0346917 |
| <b>D3GV87</b> | TY-2482_chromosome | - | 4546331 | 4546837 | 601.1834004 | 610.7558207 | 641.8323622 | 167.253625  | 303.2187166 | 266.8697319 | 1.407205262  | 8.070126121 | 7.2432894 |
| <b>B7L696</b> | TY-2482_chromosome | - | 4546917 | 4547465 | 328.2281166 | 369.7668004 | 313.3900385 | 122.4543825 | 177.6502964 | 118.7852897 | 1.225754319  | 8.322216151 | 7.4777837 |
| <b>B7L697</b> | TY-2482_chromosome | - | 4547639 | 4548100 | 1491.731988 | 1852.851152 | 1556.00797  | 494.1815752 | 764.7436241 | 399.3577806 | 1.481191241  | 10.13130173 | 9.1978677 |
| <b>B7L699</b> | TY-2482_chromosome | - | 4548803 | 4551949 | 12858.37679 | 11854.78234 | 12926.13984 | 17446.04443 | 15019.40952 | 17359.43873 | -0.38176554  | 0.500181707 | 0.3846559 |
| <b>B7L6A0</b> | TY-2482_chromosome | - | 4551975 | 4553165 | 3208.053916 | 3508.175895 | 3645.293656 | 6108.220116 | 5175.348141 | 6786.927788 | -0.78881496  | 1.493027391 | 1.2297067 |
| <b>B7L6A1</b> | TY-2482_chromosome | + | 4553307 | 4553951 | 423.9009412 | 483.2685296 | 431.0116151 | 193.4599215 | 254.0434205 | 189.7407023 | 1.033049417  | 4.323660378 | 5.7043329 |
| <b>B7L7E3</b> | TY-2482_chromosome | + | 4554082 | 4557441 | 1352.330011 | 1113.951924 | 1165.837534 | 1611.417348 | 1775.536235 | 1723.449765 | -0.450847275 | 1.780273621 | 1.4802882 |
| <b>B7L792</b> | TY-2482_chromosome | - | 4557834 | 4558358 | 280.424959  | 293.157148  | 265.9103434 | 177.8245116 | 172.8522551 | 207.596861  | 0.588625087  | 2.448192613 | 2.0703349 |
| <b>B7L793</b> | TY-2482_chromosome | + | 4558428 | 4558802 | 152.6257545 | 137.3610565 | 147.8953972 | 86.40391527 | 75.5307246  | 60.93262719 | 0.948562864  | 5.648141075 | 4.9800215 |
| <b>B7L794</b> | TY-2482_chromosome | + | 4558958 | 4559506 | 436.1552051 | 376.9823136 | 390.0907655 | 548.6997399 | 590.5900517 | 695.6102382 | -0.547721131 | 2.459339634 | 2.0803447 |
| <b>B7L795</b> | TY-2482_chromosome | + | 4559638 | 4561566 | 1657.261381 | 1569.106244 | 1588.466345 | 2511.116102 | 2565.397689 | 2930.943249 | -0.700263872 | 1.928305345 | 1.6090007 |
| <b>P77122</b> | TY-2482_chromosome | - | 4561601 | 4561975 | 2406.735614 | 1977.126088 | 2208.471283 | 2747.486173 | 2819.291471 | 3361.060138 | -0.362674345 | 0.668333314 | 0.5232697 |

|               |                    |   |         |         |             |             |             |             |             |             |              |             |           |
|---------------|--------------------|---|---------|---------|-------------|-------------|-------------|-------------|-------------|-------------|--------------|-------------|-----------|
| <b>B7L797</b> | TY-2482_chromosome | + | 4561951 | 4562553 | 2720.156693 | 2083.193343 | 2424.371643 | 3360.366113 | 3278.871333 | 3688.811963 | -0.443891374 | 0.82509142  | 0.6565467 |
| <b>B7L798</b> | TY-2482_chromosome | + | 4562666 | 4564537 | 3784.855533 | 3578.310105 | 3672.192731 | 7303.72919  | 5299.981605 | 7279.048686 | -0.842304145 | 1.59853588  | 1.323185  |
| <b>B5Z3Y5</b> | TY-2482_chromosome | + | 4564661 | 4565362 | 2282.398139 | 2213.080722 | 2305.561836 | 2199.143983 | 2602.821133 | 2281.394448 | -0.03985252  | 0.062926554 | 0.0442611 |
| <b>B7L7A0</b> | TY-2482_chromosome | + | 4565601 | 4566560 | 1520.326617 | 1427.998949 | 1630.29338  | 974.5076319 | 965.5385058 | 1028.729395 | 0.665453839  | 2.658212433 | 2.2579826 |
| <b>B7L7A1</b> | TY-2482_chromosome | - | 4566563 | 4567519 | 307.2488713 | 314.6534649 | 342.1574129 | 258.1553429 | 244.7806212 | 247.3903766 | 0.36785054   | 1.143160758 | 0.9266083 |
| <b>B7L7A2</b> | TY-2482_chromosome | + | 4567671 | 4568972 | 676.1625467 | 590.921976  | 639.756517  | 1147.905536 | 1112.045775 | 1210.265452 | -0.826214122 | 5.133222206 | 4.5008182 |
| <b>B7L7A3</b> | TY-2482_chromosome | - | 4569111 | 4570784 | 1764.001924 | 1847.199779 | 2016.552126 | 1271.467402 | 1059.182328 | 1390.296182 | 0.622033444  | 2.425103914 | 2.0502004 |
| <b>B7L7A4</b> | TY-2482_chromosome | - | 4571025 | 4572242 | 162.3956077 | 125.7613722 | 165.937863  | 313.6919047 | 323.9423871 | 373.3729921 | -1.053402661 | 7.393491344 | 6.6178071 |
| <b>B7L7A5</b> | TY-2482_chromosome | + | 4572460 | 4574109 | 1298.032981 | 1493.474033 | 1491.575036 | 1147.453079 | 1503.465103 | 0.07089033  | 0.148429626  | 0.1080729   |           |
| <b>B7L7A6</b> | TY-2482_chromosome | - | 4574152 | 4574628 | 275.0193488 | 291.5138181 | 329.7245292 | 351.4065862 | 359.5035503 | 312.0464641 | -0.190186269 | 0.454244231 | 0.3468363 |
| <b>sroB</b>   | TY-2482_chromosome | + | 4574750 | 4574833 | 49.919925   | 65.33437153 | 52.67968933 | 18.47874017 | 19.14915914 | 13.45420736 | 1.609513739  | 8.884549296 | 8.0119551 |
| <b>B7L7A7</b> | TY-2482_chromosome | - | 4574835 | 4575626 | 717.3789716 | 596.2470007 | 638.362358  | 264.0928516 | 361.3593328 | 360.2474253 | 1.067573     | 5.549680822 | 4.8994657 |
| <b>B6I0D3</b> | TY-2482_chromosome | + | 4575710 | 4576102 | 384.9847382 | 459.6267019 | 389.363032  | 464.9149419 | 587.1765015 | 350.6117267 | -0.272690285 | 0.393139947 | 0.2878683 |
| <b>B7L7A9</b> | TY-2482_chromosome | - | 4576222 | 4578723 | 1382.062752 | 1265.553265 | 1356.140926 | 1100.824923 | 1020.147149 | 992.118386  | 0.368677901  | 1.139835967 | 0.9237533 |
| <b>B7L7B0</b> | TY-2482_chromosome | + | 4578985 | 4579914 | 355.0726239 | 368.8087548 | 411.5493169 | 307.144818  | 255.5601044 | 420.2514709 | 0.276901238  | 0.467643394 | 0.3576714 |
| <b>B7L7B1</b> | TY-2482_chromosome | + | 4579920 | 4581209 | 348.2453961 | 414.0665607 | 411.4487567 | 341.365198  | 300.1983377 | 421.8245169 | 0.155874957  | 0.296846091 | 0.2220578 |
| <b>B7L7B2</b> | TY-2482_chromosome | + | 4581337 | 4581741 | 525.6365647 | 583.8753933 | 524.7550984 | 289.506335  | 302.1398314 | 302.5784091 | 0.843832273  | 4.650454282 | 4.0566759 |
| <b>P0AAS3</b> | TY-2482_chromosome | - | 4581748 | 4582203 | 566.7983027 | 592.2513547 | 576.346796  | 387.6935313 | 302.0180601 | 380.064921  | 0.681484826  | 3.214874586 | 2.750875  |
| <b>B7L7B4</b> | TY-2482_chromosome | - | 4582203 | 4583117 | 886.2280792 | 774.2212572 | 925.1753226 | 625.8456427 | 616.0892322 | 626.2440402 | 0.516233403  | 1.742337072 | 1.4494144 |
| <b>B7L7B5</b> | TY-2482_chromosome | + | 4583263 | 4583937 | 508.4554106 | 543.0876225 | 514.2535595 | 246.2253563 | 251.1766519 | 246.0647827 | 1.056317911  | 6.959007689 | 6.2076106 |
| <b>B7L7B6</b> | TY-2482_chromosome | + | 4583927 | 4584703 | 488.184717  | 555.6256086 | 520.232489  | 284.453516  | 290.3464416 | 243.6866671 | 0.883992698  | 5.237361826 | 4.5950495 |
| <b>D3GVD0</b> | TY-2482_chromosome | - | 4584772 | 4585659 | 1170.634444 | 862.6361233 | 1072.295846 | 2110.615417 | 1945.605543 | 2434.879729 | -0.970024232 | 6.311197136 | 5.5997751 |
| <b>B7L7B8</b> | TY-2482_chromosome | - | 4585687 | 4586493 | 387.404251  | 368.8340859 | 381.6039918 | 516.7103545 | 480.4221813 | 611.4042619 | -0.460902996 | 1.850978836 | 1.5431602 |
| <b>B7L7B9</b> | TY-2482_chromosome | - | 4586486 | 4587109 | 638.8931747 | 473.6838986 | 597.6201831 | 476.5009165 | 582.5141185 | 509.2377921 | 0.209408968  | 0.260206467 | 0.1935926 |
| <b>B7L7C0</b> | TY-2482_chromosome | + | 4587077 | 4587760 | 257.3595774 | 227.5867283 | 242.9385447 | 320.5733586 | 276.5741363 | 326.1420783 | -0.31670451  | 1.065491926 | 0.8591587 |
| <b>B7L7C1</b> | TY-2482_chromosome | + | 4587760 | 4590171 | 329.7889601 | 337.1954026 | 316.7902562 | 445.2145448 | 391.221141  | 507.4938057 | -0.44423637  | 1.537511654 | 1.2675093 |
| <b>B7L7C2</b> | TY-2482_chromosome | + | 4590604 | 4594890 | 165.27391   | 164.8830173 | 160.3580342 | 105.6875093 | 115.6286697 | 97.57300333 | 0.605919432  | 2.853909468 | 2.4308491 |
| <b>B7L7C9</b> | TY-2482_chromosome | - | 4596973 | 4597404 | 68.70337227 | 83.42894508 | 65.11271929 | 43.61627059 | 61.07266057 | 51.35811223 | 0.433893866  | 1.725792116 | 1.040511  |
| <b>B7L7D0</b> | TY-2482_chromosome | - | 4597487 | 4598578 | 248.9973163 | 262.2716617 | 240.8511457 | 275.065578  | 261.1220574 | 311.5565612 | -0.175487085 | 0.407946871 | 0.3098219 |
| <b>B7L7D1</b> | TY-2482_chromosome | - | 4598650 | 4599573 | 37.44009805 | 34.03674244 | 35.6134266  | 23.72346418 | 26.46819957 | 16.19935547 | 0.663535597  | 1.792532866 | 1.4907409 |
| <b>B7L7D2</b> | TY-2482_chromosome | + | 4599803 | 4600282 | 39.31851422 | 59.71146479 | 48.16100036 | 25.62957167 | 25.4826675  | 23.78466582 | 0.879171585  | 3.391133765 | 2.9087471 |
| <b>B7L7D3</b> | TY-2482_chromosome | + | 4600363 | 4601175 | 1314.670484 | 1339.360819 | 1307.207531 | 1361.959949 | 1442.45339  | 1366.996116 | -0.080146128 | 0.146478222 | 0.1067476 |
| <b>B7L7D4</b> | TY-2482_chromosome | + | 4601268 | 4603046 | 75.42675271 | 75.33639405 | 86.02115963 | 97.41048785 | 83.67822043 | 85.62744701 | -0.168427887 | 0.366657303 | 0.2773874 |
| <b>B7L7D5</b> | TY-2482_chromosome | + | 4603062 | 4603835 | 24.54879099 | 32.11264458 | 24.93908097 | 28.22897919 | 24.50504161 | 31.3970376  | -0.10026918  | 0.045088482 | 0.0309937 |
| <b>B7L7D6</b> | TY-2482_chromosome | + | 4603938 | 4604813 | 25.24441873 | 32.57140842 | 29.05137465 | 45.64788619 | 23.5417299  | 21.55172823 | -0.211316539 | 0.059746536 | 0.0423705 |
| <b>B7L7D8</b> | TY-2482_chromosome | + | 4606499 | 4607857 | 55.96627914 | 57.18483801 | 64.89072648 | 54.03060356 | 29.90313644 | 31.92464843 | 0.559667921  | 1.77272245  | 1.4743487 |
| <b>B7L7D9</b> | TY-2482_chromosome | + | 4607917 | 4609215 | 50.26874449 | 41.98549092 | 42.77111227 | 82.9798358  | 59.93119206 | 82.68704223 | -0.722240954 | 2.65776813  | 2.2577774 |
| <b>B7L7E0</b> | TY-2482_chromosome | + | 4609240 | 4610382 | 153.8170793 | 206.3597252 | 160.8838991 | 178.570007  | 140.8993305 | 223.0730183 | -0.107251292 | 0.106978246 | 0.0789749 |
| <b>B7L7E1</b> | TY-2482_chromosome | - | 4610517 | 4611299 | 128.0997427 | 90.00751063 | 121.6278757 | 191.4814821 | 224.832615  | 217.0306297 | -0.793701234 | 4.669913157 | 4.0727733 |
| <b>B7L7E2</b> | TY-2482_chromosome | - | 4611313 | 4612545 | 80.6671181  | 82.75946389 | 89.25182703 | 116.2069903 | 100.9191961 | 132.5678702 | -0.438282162 | 1.675663352 | 1.3899652 |
| <b>B7L7E6</b> | TY-2482_chromosome | + | 4615610 | 4616866 | 24.39077415 | 37.0043749  | 31.05362996 | 33.01930497 | 27.25151368 | 29.0170396  | -0.040746116 | 0.042026749 | 0.0287268 |
| <b>B7L7E8</b> | TY-2482_chromosome | + | 4617692 | 4618582 | 33.82138248 | 30.82302948 | 25.44066296 | 32.66889515 | 33.64306077 | 39.27723661 | -0.223155255 | 0.360965196 | 0.2726292 |
| <b>P77130</b> | TY-2482_chromosome | - | 4618492 | 4618776 | 51.25382236 | 36.98197023 | 33.26821693 | 118.6540867 | 122.8236027 | 141.8407019 | -1.609135044 | 1.23090516  | 1.1286457 |
| <b>B7L7E9</b> | TY-2482_chromosome | - | 4618783 | 4619847 | 395.6887501 | 351.3278693 | 384.2802432 | 1485.459903 | 1355.896733 | 1653.467214 | -1.944131514 | 22.38454459 | 21.047418 |
| <b>B7L7F0</b> | TY-2482_chromosome | - | 4619847 | 4620353 | 224.5671713 | 174.3320681 | 204.0176347 | 706.4371189 | 770.8269139 | 774.8363888 | -1.831645765 | 18.48328614 | 17.23556  |
| <b>B7L7F1</b> | TY-2482_chromosome | + | 4620474 | 4621193 | 837.6577848 | 778.4060316 | 786.9201329 | 1224.093613 | 1348.764803 | 1117.228731 | -0.620644306 | 2.634843012 | 2.2358073 |
| <b>P77131</b> | TY-2482_chromosome | + | 4621184 | 4621867 | 4968.542988 | 5311.038042 | 5178.208414 | 5631.730452 | 7945.861428 | 5394.440709 | -0.309614311 | 0.355259796 | 0.2684373 |
| <b>B7L7F3</b> | TY-2482_chromosome | + | 4621864 | 4623246 | 769.6227945 | 691.1560923 | 728.8658456 | 1243.284119 | 1035.532381 | 1294.352522 | -0.67998918  | 3.543618344 | 3.0447412 |
| <b>B7L7F4</b> | TY-2482_chromosome | - | 4623288 | 4623806 | 50.91530557 | 38.07991276 | 54.38780963 | 47.3776895  | 35.36855619 | 52.32419067 | 0.18058042   | 0.148585976 | 0.1081248 |
| <b>Q1RF06</b> | TY-2482_chromosome | + | 4623892 | 4624146 | 597.728877  | 505.8462521 | 519.4608684 | 564.7712454 | 565.1391048 | 555.2467545 | -0.033053582 | 0.09951717  | 0.0731715 |
| <b>B7L7F6</b> | TY-2482_chromosome | - | 4624131 | 4624994 | 1521.146776 | 1450.569792 | 1463.02168  | 1896.462876 | 1854.626745 | 2206.003757 | -0.394447524 | 1.441142818 | 1.1845743 |
| <b>B7L8D7</b> | TY-2482_chromosome | + | 4626960 | 4629566 | 25.37774793 | 29.92080681 | 23.57787104 | 38.43572879 | 31.83324126 | 26.64312503 | -0.399865211 | 0.537962244 | 0.4155536 |
| <b>B7L8E2</b> | TY-2482_chromosome | - | 4632118 | 4632876 | 37.76904837 | 59.75156009 | 50.22771743 | 30.69260153 | 20.86375337 | 20.01360839 | 0.905764149  | 3.591392716 | 3.0875544 |
| <b>B7L8E3</b> | TY-2482_chromosome | - | 4633062 | 4633949 | 49.95650478 | 65.1083141  | 49.28897518 | 41.79552629 | 28.11111223 | 32.99193303 | 0.558226861  | 1.916488264 | 1.598775  |
| <b>B7L8E4</b> | TY-2482_chromosome | - | 4633953 | 4636922 | 225.9932214 | 203.9302146 | 197.2266067 | 140.1463426 | 112.7652683 | 126.3287903 | 0.712556314  | 3.545382164 | 3.0461463 |
| <b>B7L8E5</b> | TY-2482_chromosome | - | 4636912 | 4639146 | 102.4484162 | 112.2871271 | 91.49350511 | 83.3775577  | 91.05903124 | 75.23094224 | 0.233707153  | 0.779513146 | 0.6183402 |
| <b>B7L8E8</b> | TY-2482_chromosome | - | 4641084 | 4641332 | 93.9161511  | 131.916109  | 110.2066939 | 111.509924  | 94.797656   | 19.71278544 | 0.332036587  | 1.030643784 | 0.8287258 |

|               |                    |   |         |         |             |             |             |             |             |             |              |             |           |
|---------------|--------------------|---|---------|---------|-------------|-------------|-------------|-------------|-------------|-------------|--------------|-------------|-----------|
| <b>B7L8E9</b> | TY-2482_chromosome | - | 4641332 | 4646191 | 659.4671996 | 748.6308186 | 674.651831  | 340.6417541 | 330.4410846 | 203.3685314 | 1.146115235  | 7.636810951 | 6.844331  |
| <b>B7L8F2</b> | TY-2482_chromosome | - | 4649341 | 4650798 | 63.51889402 | 55.57765195 | 72.91410335 | 93.49390897 | 107.3600753 | 131.1326704 | -0.678634323 | 3.385962341 | 2.9044032 |
| <b>B7L8F3</b> | TY-2482_chromosome | - | 4650779 | 4651459 | 156.4170957 | 142.1346113 | 139.8256016 | 184.5670495 | 195.713004  | 162.1019893 | -0.317111369 | 0.900557799 | 0.71949   |
| <b>B7L8F7</b> | TY-2482_chromosome | + | 4654605 | 4657745 | 115.2299645 | 103.8380017 | 111.578282  | 109.8764501 | 92.76400526 | 100.0347787 | 0.134997961  | 0.272243913 | 0.2035172 |
| <b>B7L8F8</b> | TY-2482_chromosome | + | 4657850 | 4659223 | 480.9544241 | 453.5607363 | 434.9321237 | 347.1619618 | 412.3196834 | 368.4508707 | 0.289601426  | 0.768362534 | 0.608704  |
| <b>B7L8F9</b> | TY-2482_chromosome | - | 4659297 | 4660541 | 916.8005599 | 884.2809369 | 985.8819648 | 1231.495984 | 1214.943031 | 1055.405588 | -0.328103719 | 0.978551697 | 0.7842913 |
| <b>B7L8G0</b> | TY-2482_chromosome | - | 4660652 | 4661302 | 1666.94174  | 1620.5176   | 1645.939616 | 1611.894932 | 1851.049052 | 2008.688831 | -0.107271155 | 0.33301507  | 0.250126  |
| <b>B7N9I3</b> | TY-2482_chromosome | - | 4661399 | 4661884 | 198.0316033 | 259.9055053 | 178.481612  | 100.0749945 | 114.6440028 | 137.739234  | 0.793764368  | 3.964317242 | 3.4262031 |
| <b>B7L8G2</b> | TY-2482_chromosome | - | 4661832 | 4662077 | 177.1215867 | 202.5235876 | 179.4609424 | 179.4609424 | 75.3556933  | 82.83138519 | 1.194529531  | 9.100218853 | 8.2168475 |
| <b>B7L8G3</b> | TY-2482_chromosome | - | 4662146 | 4663261 | 809.9790133 | 724.831862  | 796.9478081 | 714.430832  | 656.0642528 | 816.6933271 | 0.143079139  | 0.193699232 | 0.1429626 |
| <b>P11901</b> | TY-2482_chromosome | + | 4663932 | 4665041 | 238.6156943 | 241.6355449 | 211.0195496 | 181.1153834 | 194.7662065 | 190.765281  | 0.268678189  | 0.817815318 | 0.6506711 |
| <b>P11901</b> | TY-2482_chromosome | - | 4665903 | 4667012 | 226.4822013 | 244.4515044 | 241.0027149 | 186.9631842 | 221.2143152 | 190.9008565 | 0.242711951  | 0.655069894 | 0.5122596 |
| <b>B7L8G6</b> | TY-2482_chromosome | - | 4667976 | 4670213 | 96.89135914 | 127.7438802 | 124.2871303 | 45.76715516 | 50.97076364 | 52.53535051 | 1.208983995  | 6.757566898 | 6.7874101 |
| <b>B7L8G7</b> | TY-2482_chromosome | + | 4670534 | 4671655 | 124.1002672 | 140.3991039 | 113.2823989 | 28.40924798 | 24.54297033 | 23.82225684 | 2.217391716  | 21.54420803 | 20.221322 |
| <b>B7L8G9</b> | TY-2482_chromosome | + | 4671876 | 4675754 | 580.5384478 | 482.8205479 | 506.2771246 | 132.872172  | 102.7231119 | 130.1100397 | 2.124103979  | 21.37490379 | 20.05995  |
| <b>B7L8H1</b> | TY-2482_chromosome | - | 4677106 | 4677918 | 199.7451169 | 176.2245252 | 196.1348567 | 25.75643885 | 25.51287251 | 18.74230912 | 3.021668433  | 37.45251171 | 35.775437 |
| <b>B7L8H2</b> | TY-2482_chromosome | - | 4677918 | 4678907 | 227.4776171 | 218.6636424 | 189.1725193 | 28.13133003 | 26.33406131 | 33.96372488 | 2.844657615  | 34.07679396 | 32.492995 |
| <b>B7L8H3</b> | TY-2482_chromosome | - | 4678907 | 4679908 | 259.5239531 | 240.3557127 | 261.507234  | 30.20627304 | 16.26494422 | 18.66175322 | 3.497938547  | 48.49454683 | 46.627593 |
| <b>B7L8H4</b> | TY-2482_chromosome | + | 4680019 | 4681266 | 76.39637254 | 67.59874449 | 68.55370742 | 25.26714962 | 13.49833546 | 24.77026601 | 1.746189284  | 10.29039716 | 9.348722  |
| <b>B7L8H5</b> | TY-2482_chromosome | - | 4681276 | 4682229 | 173.6400871 | 138.2795209 | 168.462317  | 36.57725209 | 44.65291291 | 38.25264436 | 2.070353499  | 20.46608637 | 19.166576 |
| <b>B7L8H6</b> | TY-2482_chromosome | + | 4682604 | 4683776 | 49.99495539 | 64.87353768 | 45.89656998 | 20.22291966 | 7.107063886 | 16.95362983 | 1.732981479  | 8.875722696 | 8.0038375 |
| <b>B7L8H7</b> | TY-2482_chromosome | + | 4683789 | 4685396 | 136.9182444 | 122.0098658 | 134.055641  | 56.08162184 | 56.49493844 | 36.06889771 | 1.375699176  | 9.964620545 | 9.0344397 |
| <b>B7L8H8</b> | TY-2482_chromosome | + | 4685413 | 4686267 | 118.374971  | 79.97689616 | 115.0907524 | 37.91297935 | 18.93016923 | 34.02280499 | 1.858563176  | 11.27068588 | 10.281586 |
| <b>B7L8H9</b> | TY-2482_chromosome | + | 4686270 | 4687013 | 128.7311049 | 123.543342  | 111.3437076 | 45.29498623 | 46.42171306 | 43.51072242 | 1.40645997   | 10.55797007 | 9.600193  |
| <b>B7L8I0</b> | TY-2482_chromosome | + | 4687019 | 4687429 | 63.50469959 | 62.36718012 | 68.77521325 | 28.03456753 | 19.04346028 | 18.67074812 | 1.526523034  | 8.915581245 | 8.0401392 |
| <b>B7L8I1</b> | TY-2482_chromosome | + | 4687613 | 4689715 | 1295.402205 | 1152.10383  | 1165.191179 | 443.1945136 | 375.7177564 | 542.8393304 | 1.455299814  | 11.15797253 | 10.174405 |
| <b>B7L8I2</b> | TY-2482_chromosome | + | 4689900 | 4690094 | 177.9836354 | 168.1223249 | 182.2890941 | 106.6793562 | 101.0502265 | 76.75918872 | 0.867949237  | 5.020056244 | 4.3945363 |
| <b>B7L8I3</b> | TY-2482_chromosome | - | 4690110 | 4691195 | 241.5572579 | 246.9684984 | 227.626704  | 122.4742389 | 111.8601165 | 139.1935352 | 0.938285906  | 5.529168197 | 4.9885177 |
| <b>B7L8I4</b> | TY-2482_chromosome | + | 4691304 | 4692461 | 117.6473205 | 107.8879605 | 86.71101396 | 88.37159129 | 94.61229661 | 112.8227843 | 0.08804455   | 0.140601682 | 0.1032424 |
| <b>B7L8I5</b> | TY-2482_chromosome | - | 4692468 | 4693094 | 55.8248202  | 84.55140172 | 57.81406837 | 54.82270984 | 41.78491054 | 46.13765878 | 0.325766015  | 1.125565692 | 0.9107333 |
| <b>B7L8I6</b> | TY-2482_chromosome | - | 4693070 | 4694287 | 30.71168989 | 28.63905574 | 28.30077953 | 40.6499904  | 28.15430502 | 24.08408611 | -0.149418455 | 0.110231023 | 0.0808044 |
| <b>B7L8I8</b> | TY-2482_chromosome | - | 4695548 | 4696291 | 541.3956083 | 526.0816528 | 570.5441457 | 80.38779609 | 90.97646666 | 111.4162519 | 2.60128992   | 29.51378078 | 28.018788 |
| <b>B7L8I9</b> | TY-2482_chromosome | + | 4696663 | 4697223 | 13958.37805 | 13979.15178 | 14224.10745 | 16748.24756 | 18714.32537 | 18452.76613 | -0.335302842 | 0.419270916 | 0.3193531 |
| <b>B7L8J0</b> | TY-2482_chromosome | + | 4697355 | 4698917 | 2752.03433  | 2715.174011 | 2758.450632 | 4880.85324  | 4229.830846 | 5079.409932 | -0.777184345 | 1.507611565 | 1.24149   |
| <b>B7L8J1</b> | TY-2482_chromosome | - | 4699044 | 4699469 | 1500.016312 | 1602.220935 | 1680.429751 | 188.6166454 | 167.6688241 | 235.4657592 | 2.826337216  | 38.09798141 | 36.407119 |
| <b>B7L8J2</b> | TY-2482_chromosome | + | 4699690 | 4700925 | 76.23912523 | 68.27855685 | 85.41255221 | 148.8830075 | 121.9160722 | 106.946601  | -0.716752513 | 3.213997279 | 2.7502746 |
| <b>C3TJV7</b> | TY-2482_chromosome | + | 4701009 | 4701467 | 331.8887534 | 397.7653894 | 334.5553988 | 281.4583806 | 335.8677488 | 309.1925536 | 0.160193809  | 0.470396831 | 0.3600545 |
| <b>D3GX75</b> | TY-2482_chromosome | - | 4701802 | 4702623 | 846.6190882 | 776.0746566 | 819.3413458 | 435.6177399 | 571.5960002 | 527.5040357 | 0.721052061  | 3.013460126 | 2.5721245 |
| <b>B7L8J5</b> | TY-2482_chromosome | - | 4702722 | 4704182 | 42.07489403 | 86.26438728 | 62.70547482 | 46.8950412  | 31.83583652 | 16.5602456  | 0.736990968  | 2.756076309 | 2.3454394 |
| <b>B7L8K1</b> | TY-2482_chromosome | - | 4708403 | 4709458 | 41.94597072 | 38.94964904 | 38.18442961 | 28.89760795 | 19.99600639 | 12.39605219 | 0.861257936  | 2.880514738 | 2.4534026 |
| <b>B7L8K2</b> | TY-2482_chromosome | + | 4709838 | 4711493 | 206.2297499 | 250.9794292 | 213.7733428 | 176.0785297 | 121.8576892 | 116.1781515 | 0.57486516   | 2.908643343 | 2.4784674 |
| <b>B7L8K3</b> | TY-2482_chromosome | + | 4711465 | 4712142 | 344.6349884 | 365.7493165 | 374.4268076 | 105.8776986 | 91.85825426 | 99.99687834 | 1.852345685  | 18.57866499 | 17.329252 |
| <b>B7L8K4</b> | TY-2482_chromosome | - | 4712189 | 4713571 | 2695.762095 | 3005.778559 | 3104.567877 | 101.451392  | 80.00794538 | 86.92440896 | 5.003532529  | 89.1660995  | 86.460996 |
| <b>B7L9L5</b> | TY-2482_chromosome | + | 4714160 | 4714717 | 112.020023  | 128.1903965 | 122.1510614 | 45.09882374 | 64.7986422  | 37.3216369  | 1.256842738  | 7.984131276 | 7.1648917 |
| <b>Q8D127</b> | TY-2482_chromosome | + | 4714865 | 4715101 | 20735.1158  | 26340.77977 | 21240.85048 | 9512.365697 | 25639.55762 | 7771.177728 | 0.591750081  | 0.818044738 | 0.6507607 |
| <b>B7L9G9</b> | TY-2482_chromosome | - | 4715161 | 4715541 | 171.7725258 | 215.0077488 | 190.7625967 | 106.4567384 | 179.5052354 | 122.6149213 | 0.47413934   | 1.595033896 | 1.3204    |
| <b>C8UJU2</b> | TY-2482_chromosome | + | 4715634 | 4716419 | 132.9232622 | 149.2473083 | 155.3048269 | 100.1517819 | 100.1517819 | 76.71485909 | 0.614475939  | 2.843604804 | 2.4218029 |
| <b>B7L9H1</b> | TY-2482_chromosome | + | 4716551 | 4716751 | 807.0654149 | 706.6578947 | 733.4311246 | 160.3719051 | 276.958681  | 153.1728204 | 1.950885546  | 15.4031613  | 14.244875 |
| <b>B7L9H2</b> | TY-2482_chromosome | - | 4716858 | 4717820 | 2598.004248 | 2404.187570 | 2676.038557 | 8451.31341  | 8024.772679 | 9416.94311  | -1.70784259  | 5.218539968 | 4.578726  |
| <b>B7L9H3</b> | TY-2482_chromosome | - | 4718032 | 4718982 | 109.5457527 | 81.17700483 | 82.25353437 | 60.29235326 | 77.49507323 | 50.42371488 | 0.55138979   | 1.711494675 | 1.4226621 |
| <b>C6V152</b> | TY-2482_chromosome | - | 4719244 | 4719882 | 275.9520287 | 243.6052263 | 298.6623817 | 393.1247343 | 434.0999038 | 453.7456328 | -0.573216275 | 2.806558932 | 2.3890087 |
| <b>B7L9H5</b> | TY-2482_chromosome | - | 4719986 | 4720246 | 256.7256846 | 204.9756932 | 228.3872652 | 333.7678202 | 527.1565003 | 346.3908406 | -0.752942445 | 3.44874515  | 2.9590739 |
| <b>B7L9H6</b> | TY-2482_chromosome | - | 4720360 | 4721568 | 1045.406256 | 1041.134673 | 1125.823263 | 2202.681412 | 2200.509921 | 2091.945917 | -1.00808956  | 6.285894458 | 5.5749618 |
| <b>B7L9H7</b> | TY-2482_chromosome | - | 4721710 | 4722795 | 1814.401933 | 1674.518698 | 1574.43649  | 1847.366227 | 1613.423023 | 2034.974418 | -0.105703022 | 0.24620553  | 0.1826867 |
| <b>B7L9H8</b> | TY-2482_chromosome | - | 4722809 | 4723918 | 1032.15018  | 966.0431151 | 895.7043416 | 857.261335  | 1079.381685 | 1043.171486 | -0.016329878 | 0.079362103 | 0.0576063 |
| <b>B7L9H9</b> | TY-2482_chromosome | - | 4723924 | 4725822 | 605.7406673 | 640.660016  | 561.6384469 | 705.68086   | 792.6613235 | 837.8655674 | -0.373712678 | 1.179198099 | 0.9577615 |
| <b>B7L9I0</b> | TY-2482_chromosome | - | 4725856 | 4726320 | 839.1962452 | 762.9941667 | 761.1240668 | 885.0323303 | 1011.108071 | 960.4017663 | -0.249032567 | 0.816061985 | 0.6490576 |



|               |                    |   |         |         |             |             |             |             |             |             |              |             |           |
|---------------|--------------------|---|---------|---------|-------------|-------------|-------------|-------------|-------------|-------------|--------------|-------------|-----------|
| <b>B7L9I1</b> | TY-2482_chromosome | - | 4726327 | 4726641 | 569.0264238 | 559.651712  | 625.4164098 | 735.8862556 | 880.0765905 | 823.566591  | -0.433794504 | 1.734472573 | 1.4428555 |
| <b>P77108</b> | TY-2482_chromosome | + | 4726655 | 4726942 | 140.8574787 | 104.8330222 | 122.0916703 | 204.8787067 | 216.6291922 | 190.9529089 | -0.688826626 | 3.498096565 | 3.0039953 |
| <b>B7L9I2</b> | TY-2482_chromosome | - | 4726904 | 4727512 | 279.1376375 | 247.6891871 | 232.8122607 | 401.8929403 | 388.5609758 | 413.0510138 | -0.657074306 | 2.982668697 | 2.5444764 |
| <b>B7L9I3</b> | TY-2482_chromosome | - | 4727539 | 4728177 | 521.3613595 | 474.4920786 | 473.2633497 | 805.7212636 | 807.1958163 | 848.5052662 | -0.726070549 | 3.7315136   | 3.2117322 |
| <b>B7L9I4</b> | TY-2482_chromosome | - | 4728182 | 4729210 | 1224.320875 | 1082.819411 | 1160.014333 | 1886.514628 | 1960.210798 | 2294.122043 | -0.766305785 | 4.246121496 | 3.6881792 |
| <b>B7L9I5</b> | TY-2482_chromosome | - | 4729213 | 4729791 | 2006.571202 | 1798.679534 | 1853.860126 | 3180.295586 | 3446.366096 | 3603.338425 | -0.815582353 | 1.807269009 | 1.5034038 |
| <b>B7L9I6</b> | TY-2482_chromosome | - | 4729809 | 4732388 | 5785.304825 | 5600.128407 | 5632.414183 | 12424.50592 | 10731.20308 | 14890.97804 | -1.126772035 | 2.467855947 | 2.0872639 |
| <b>B7L9I7</b> | TY-2482_chromosome | + | 4732623 | 4733102 | 911.5032045 | 983.6447804 | 961.3022556 | 702.2174858 | 628.8060307 | 638.1741134 | 0.507072635  | 2.26020919  | 1.9021106 |
| <b>B7L9I8</b> | TY-2482_chromosome | - | 4733178 | 4734152 | 156.9245212 | 193.7725845 | 147.5797882 | 141.8043772 | 154.7604628 | 131.7743925 | 0.131195201  | 0.512632774 | 0.3946167 |
| <b>B7L9J3</b> | TY-2482_chromosome | + | 4737816 | 4739264 | 96.41942281 | 102.6474948 | 95.64418073 | 56.90560688 | 80.26284395 | 49.1309249  | 0.627807457  | 2.447661137 | 2.0700305 |
| <b>C8TKH1</b> | TY-2482_chromosome | - | 4739330 | 4740997 | 76.11193121 | 89.43135061 | 83.85281694 | 118.6081148 | 86.34592882 | 101.3487926 | -0.353027169 | 0.814279247 | 0.6478336 |
| <b>B7L9J7</b> | TY-2482_chromosome | - | 4741084 | 4742016 | 1040.180172 | 1053.734871 | 1089.437462 | 1201.237584 | 1109.159881 | 2136.62234  | -0.376317727 | 1.36101659  | 1.1152221 |
| <b>B7L9J8</b> | TY-2482_chromosome | - | 4742137 | 4742859 | 341.5839847 | 373.4883832 | 393.659513  | 122.3751983 | 145.6054128 | 166.7284624 | 1.398906714  | 10.09293682 | 9.1603184 |
| <b>B7L9J9</b> | TY-2482_chromosome | - | 4742862 | 4743533 | 179.4498505 | 178.0260527 | 183.5651937 | 91.5453645  | 74.55700275 | 80.33115463 | 1.118680918  | 8.119241252 | 7.2859704 |
| <b>B7L9K0</b> | TY-2482_chromosome | - | 4743536 | 4744273 | 152.5723652 | 140.0096327 | 156.5657436 | 57.54446633 | 60.02281833 | 73.36159673 | 1.297719066  | 8.628776923 | 7.7694606 |
| <b>B7L9K1</b> | TY-2482_chromosome | - | 4744446 | 4745351 | 340.763635  | 441.1723859 | 370.2670112 | 248.9681314 | 247.5475981 | 225.1594658 | 0.594107305  | 2.933657268 | 2.5003957 |
| <b>C8U318</b> | TY-2482_chromosome | + | 4745806 | 4747679 | 147.4934492 | 117.4967751 | 137.3541744 | 110.4733243 | 135.5884778 | 162.6719366 | 0.087549715  | 0.018425293 | 0.0122922 |
| <b>C5W100</b> | TY-2482_chromosome | + | 4747651 | 4747857 | 110.0450284 | 121.6795816 | 79.29701182 | 117.0888623 | 179.4741488 | 125.2698037 | -0.513747743 | 1.287430645 | 1.0506977 |
| <b>B7L9K4</b> | TY-2482_chromosome | - | 4747763 | 4749298 | 783.9527615 | 738.7883661 | 599.0339946 | 856.5646112 | 1088.475784 | 1082.577741 | -0.505724076 | 1.967129178 | 1.6426392 |
| <b>B7L9K5</b> | TY-2482_chromosome | - | 4749326 | 4750201 | 1656.575354 | 1532.994368 | 1496.601615 | 1758.496371 | 1805.505052 | 2069.205303 | -0.234682707 | 0.714758381 | 0.5624586 |
| <b>B7L9K6</b> | TY-2482_chromosome | - | 4750294 | 4750758 | 990.9491466 | 930.3382905 | 941.4270704 | 1157.938558 | 949.0732155 | 1190.429527 | -0.192231636 | 0.491393771 | 0.3772315 |
| <b>B7L9K7</b> | TY-2482_chromosome | - | 4750758 | 4751834 | 2371.388547 | 2234.074157 | 2468.068061 | 2331.286645 | 2293.294031 | 2516.63946  | 0.023816608  | 0.013879581 | 0.0089993 |
| <b>B7L9K8</b> | TY-2482_chromosome | - | 4751951 | 4753372 | 946.1398501 | 891.306455  | 825.0626915 | 1461.70698  | 1437.826457 | 1698.18536  | -0.771357609 | 3.916589155 | 3.3833749 |
| <b>B7L9K9</b> | TY-2482_chromosome | + | 4753518 | 4754690 | 775.3034082 | 964.205258  | 809.2847155 | 637.8248347 | 505.8621353 | 664.1341123 | 0.438216829  | 1.762405108 | 1.4661071 |
| <b>A1A8T1</b> | TY-2482_chromosome | + | 4754844 | 4755122 | 701.7209307 | 648.7303777 | 525.0696122 | 844.7327304 | 1383.58389  | 770.2549362 | -0.710481279 | 2.520413699 | 2.1340693 |
| <b>glnV</b>   | TY-2482_chromosome | - | 4754847 | 4754921 | 307.7116321 | 282.4805546 | 197.3844334 | 211.8806149 | 486.3971577 | 245.2791547 | -0.284870397 | 0.475712138 | 0.3640182 |
| <b>glnV</b>   | TY-2482_chromosome | - | 4754959 | 4755033 | 487.8527327 | 437.8315782 | 369.3012003 | 517.5587476 | 934.0630017 | 493.9915006 | -0.602365927 | 1.808691935 | 1.5042227 |
| <b>metT</b>   | TY-2482_chromosome | - | 4755082 | 4755158 | 348.6857488 | 331.8065189 | 270.9294197 | 627.6160697 | 878.4408404 | 504.5387073 | -1.133599325 | 5.62155118  | 4.9574018 |
| <b>glnU</b>   | TY-2482_chromosome | - | 4755174 | 4755248 | 1140.109343 | 869.40393   | 863.2750237 | 1290.648374 | 2179.918642 | 1108.479931 | -0.653555318 | 2.260570956 | 1.9022553 |
| <b>A1A8T2</b> | TY-2482_chromosome | + | 4755282 | 4755528 | 3754.542466 | 3081.206155 | 2687.347084 | 2465.433572 | 4610.746523 | 2038.755137 | 0.050125359  | 0.060196262 | 0.0426221 |
| <b>glnU</b>   | TY-2482_chromosome | - | 4755283 | 4755357 | 2220.79249  | 1639.745186 | 1631.757698 | 1723.288316 | 3287.529104 | 1495.360809 | -0.217164193 | 0.377454204 | 0.2864277 |
| <b>leuW</b>   | TY-2482_chromosome | - | 4755381 | 4755465 | 2736.752882 | 2307.997482 | 1846.751924 | 1465.231714 | 2832.542725 | 1144.225658 | 0.304751796  | 0.545135063 | 0.4208302 |
| <b>metT</b>   | TY-2482_chromosome | - | 4755474 | 4755550 | 1258.900579 | 1189.122853 | 868.9005646 | 543.9615631 | 1006.977113 | 374.6758279 | 0.703352157  | 2.514097508 | 2.1282161 |
| <b>D8ENZ6</b> | TY-2482_chromosome | + | 4755594 | 4755785 | 33.99730977 | 48.44139439 | 53.88102727 | 21.19496095 | 39.32952374 | 23.94548536 | 0.69545767   | 1.763783006 | 1.4669198 |
| <b>B7L9L0</b> | TY-2482_chromosome | - | 4755934 | 4757595 | 635.3961406 | 779.4742771 | 744.1575049 | 178.9675269 | 177.3714082 | 245.458736  | 1.860779653  | 1.637136909 | 15.297406 |
| <b>D8C3Y4</b> | TY-2482_chromosome | - | 4757552 | 4757830 | 48.48644611 | 51.66381874 | 54.91441513 | 16.54601163 | 21.80036838 | 33.54611794 | 1.203370408  | 4.305307063 | 3.742176  |
| <b>B7L9L1</b> | TY-2482_chromosome | - | 4757855 | 4758604 | 808.4990443 | 772.8430891 | 731.3641429 | 774.0227442 | 839.0590723 | 907.5811294 | -0.103485922 | 0.279059814 | 0.208434  |
| <b>B7L9L2</b> | TY-2482_chromosome | - | 4758655 | 4759872 | 1636.948679 | 1651.422296 | 1737.158872 | 1522.866908 | 1428.713494 | 1698.220241 | 0.137926731  | 0.237624661 | 0.1759742 |
| <b>B7L9L3</b> | TY-2482_chromosome | - | 4759884 | 4761029 | 1348.401108 | 1234.692558 | 1338.337281 | 1471.244613 | 1229.390966 | 1427.366398 | -0.056198546 | 0.14259085  | 0.1041097 |
| <b>B7L9L4</b> | TY-2482_chromosome | - | 4761092 | 4761889 | 966.9447288 | 899.9546161 | 1019.54907  | 1355.478968 | 1334.122428 | 1341.957472 | -0.452370304 | 1.754056705 | 1.4592621 |
| <b>B7L9L6</b> | TY-2482_chromosome | + | 4762222 | 4764165 | 3324.741915 | 3544.415863 | 3735.0893   | 4751.031426 | 3661.014285 | 4537.440288 | -0.29568207  | 0.364058695 | 0.2752266 |
| <b>B7L9L7</b> | TY-2482_chromosome | + | 4764371 | 4766032 | 3740.820604 | 3387.772244 | 3376.967992 | 2617.958762 | 2515.250707 | 3893.404875 | 0.297099146  | 0.259411882 | 0.1931307 |
| <b>B7L9L8</b> | TY-2482_chromosome | + | 4766481 | 4767884 | 104.621612  | 117.5823657 | 102.176242  | 60.06166338 | 89.36720095 | 59.53669608 | 0.598299085  | 2.36191903  | 1.9937202 |
| <b>B7L9L9</b> | TY-2482_chromosome | + | 4767937 | 4768260 | 47.09304928 | 46.60344795 | 47.52960186 | 27.30531519 | 19.04130787 | 19.91488908 | 1.049850204  | 4.15823725  | 3.6050825 |
| <b>B7L9M0</b> | TY-2482_chromosome | - | 4768350 | 4768793 | 1777.490452 | 1865.021984 | 1952.425186 | 2151.063285 | 2915.955991 | 2242.049375 | -0.372231161 | 0.689726105 | 0.5409255 |
| <b>B7L9M1</b> | TY-2482_chromosome | + | 4768838 | 4769089 | 733.4273134 | 831.6228804 | 841.2548268 | 1142.388336 | 1509.010649 | 1148.807109 | -0.666550823 | 2.760761778 | 2.3486527 |
| <b>D3GXD6</b> | TY-2482_chromosome | - | 4769085 | 4769729 | 1628.711736 | 1684.639655 | 1712.686683 | 1679.72093  | 2363.57693  | 1701.43411  | -0.203475459 | 0.478195372 | 0.3658856 |
| <b>B5YQM9</b> | TY-2482_chromosome | - | 4769755 | 4770114 | 155.5703416 | 180.7481684 | 123.6055422 | 92.98401403 | 102.8287666 | 112.935424  | 0.51504666   | 2.158896269 | 1.8121511 |
| <b>B7L9M4</b> | TY-2482_chromosome | - | 4770188 | 4770949 | 409.9043588 | 366.6622646 | 392.1681191 | 294.1712463 | 300.3215044 | 292.1230691 | 0.422271883  | 1.353500248 | 1.1084593 |
| <b>D3GXD9</b> | TY-2482_chromosome | + | 4770999 | 4771676 | 1376.170398 | 1183.425584 | 1275.53797  | 2284.828056 | 1978.365692 | 2353.475911 | -0.752937629 | 3.88920184  | 3.3576087 |
| <b>B7L9M6</b> | TY-2482_chromosome | + | 4771705 | 4773342 | 4130.458875 | 3501.863667 | 3898.700492 | 7771.737215 | 6694.241321 | 8297.348008 | -0.933916369 | 1.987421818 | 1.6609184 |
| <b>B7L9M7</b> | TY-2482_chromosome | - | 4773404 | 4774720 | 143.5912519 | 137.0356929 | 143.9463981 | 248.6569631 | 283.0567497 | 276.2384112 | -0.896839782 | 5.36823738  | 4.7170659 |
| <b>B7L9M8</b> | TY-2482_chromosome | - | 4774720 | 4776915 | 55.33039334 | 56.53679373 | 53.38526928 | 221.3169568 | 189.186299  | 247.0313727 | -1.986853423 | 19.57397881 | 18.29665  |
| <b>C8UJZ6</b> | TY-2482_chromosome | - | 4777608 | 4778282 | 232.7766808 | 228.3241747 | 171.8030582 | 60.2084307  | 63.68159833 | 72.15435057 | 1.667512624  | 14.63839608 | 13.514345 |
| <b>B7LAF0</b> | TY-2482_chromosome | - | 4778282 | 4780963 | 321.6170443 | 311.8017537 | 301.6085985 | 210.6787285 | 212.9254328 | 232.7257857 | 0.523147183  | 1.994570399 | 1.667259  |
| <b>B7LAA3</b> | TY-2482_chromosome | - | 4780959 | 4781528 | 39.01985489 | 29.7525135  | 36.33545084 | 32.51782923 | 37.29639013 | 44.43142327 | -0.021377085 | 0.1411746   | 0.1034206 |
| <b>B7LAA4</b> | TY-2482_chromosome | - | 4781540 | 4783585 | 42.7582476  | 38.8186522  | 35.43681402 | 59.33457655 | 21.59004289 | 45.91470248 | -0.170141694 | 0.147093638 | 0.1071568 |

|               |                    |   |         |         |             |             |             |             |              |             |              |             |           |
|---------------|--------------------|---|---------|---------|-------------|-------------|-------------|-------------|--------------|-------------|--------------|-------------|-----------|
| <b>B7LAA5</b> | TY-2482_chromosome | - | 4783611 | 4785281 | 25.19427036 | 36.87932575 | 28.97177062 | 45.97976531 | 28.1075231   | 29.24341141 | -0.329084501 | 0.278017249 | 0.2079508 |
| <b>B7LAA6</b> | TY-2482_chromosome | + | 4785683 | 4785886 | 1070.834885 | 1163.560455 | 1054.256263 | 447.04352   | 1083.543109  | 373.3499568 | 0.753464558  | 2.355726507 | 1.9881936 |
| <b>B7LAA7</b> | TY-2482_chromosome | + | 4786132 | 4790322 | 285.6889241 | 288.2919781 | 269.2315569 | 331.0850024 | 266.5215547  | 354.9291441 | -0.180594641 | 0.394924959 | 0.2992977 |
| <b>B7LAA9</b> | TY-2482_chromosome | + | 4790769 | 4792199 | 44.28826931 | 34.6710041  | 38.88713796 | 54.18091137 | 39.9524477   | 46.10474707 | -0.235368192 | 0.465514042 | 0.3560296 |
| <b>C8UJN2</b> | TY-2482_chromosome | + | 4793374 | 4794288 | 7.306708471 | 8.246656741 | 11.48173871 | 28.2339435  | 30.06221913  | 25.18084182 | -1.593399803 | 5.36220796  | 4.7118881 |
| <b>B7LAB3</b> | TY-2482_chromosome | + | 4794283 | 4794789 | 477.0802064 | 466.7579495 | 500.5433978 | 370.2124492 | 347.5500518  | 456.0960235 | 0.34811946   | 0.829948163 | 0.6604204 |
| <b>B7LAB4</b> | TY-2482_chromosome | + | 4794789 | 4796204 | 848.7599981 | 857.8371758 | 858.9501273 | 953.5432358 | 836.2383021  | 1065.344978 | -0.138383504 | 0.368642286 | 0.2791082 |
| <b>B7LAB5</b> | TY-2482_chromosome | - | 4796252 | 4797730 | 163.7767939 | 150.3853192 | 171.1248063 | 204.8089081 | 212.9568806  | 210.5116589 | -0.335578371 | 1.216150362 | 0.9878467 |
| <b>B7LAB6</b> | TY-2482_chromosome | + | 4798001 | 4798741 | 1057.256381 | 1151.463577 | 1230.867435 | 1532.531949 | 1044.565195  | 1461.438432 | -0.240147531 | 0.556280338 | 0.4304526 |
| <b>B7LAB8</b> | TY-2482_chromosome | + | 4799417 | 4800346 | 1081.917435 | 1286.850497 | 1184.434169 | 1678.792847 | 1218.388598  | 1780.972765 | -0.42687431  | 1.177174139 | 0.9566872 |
| <b>B7LAB9</b> | TY-2482_chromosome | + | 4800339 | 4801070 | 790.3020012 | 877.990792  | 872.8921238 | 1084.159358 | 950.888801   | 1292.814927 | -0.373957239 | 1.287376879 | 1.0506977 |
| <b>B7LAC0</b> | TY-2482_chromosome | + | 4801109 | 4801897 | 534.7672674 | 477.596263  | 530.8910997 | 782.6946345 | 766.2158787  | 877.3094972 | -0.60277741  | 2.948097228 | 2.5132847 |
| <b>B7LAC1</b> | TY-2482_chromosome | - | 4801900 | 4802943 | 1336.482579 | 1310.782604 | 1162.401113 | 288.8079431 | 306.6916292  | 310.4381184 | 2.063222668  | 24.50482953 | 23.105555 |
| <b>E1U309</b> | TY-2482_chromosome | - | 4803783 | 4804477 | 190.6279537 | 207.9836807 | 188.7047389 | 81.65500895 | 110.1970807  | 101.2413044 | 1.006527851  | 6.084126968 | 5.3871507 |
| <b>B7LAC6</b> | TY-2482_chromosome | - | 4805773 | 4807053 | 11331.34359 | 9990.160055 | 11081.43071 | 3405.693302 | 2965.739235  | 4049.022361 | 1.697705332  | 4.472282928 | 3.8953636 |
| <b>D6HU93</b> | TY-2482_chromosome | + | 4807035 | 4807223 | 2156.819871 | 1866.434165 | 2236.400282 | 573.6930844 | 675.3066496  | 640.6845764 | 1.79547066   | 15.37158973 | 14.217394 |
| <b>D6J831</b> | TY-2482_chromosome | - | 4807493 | 4807729 | 1175.524024 | 1254.033703 | 1194.303928 | 299.1818752 | 337.6408875  | 351.119985  | 1.883449766  | 20.43960397 | 19.141986 |
| <b>B5YQQ9</b> | TY-2482_chromosome | + | 4807747 | 4808148 | 1865.771715 | 1891.010331 | 2013.827071 | 642.674423  | 605.9875508  | 848.0048418 | 1.516802723  | 10.85386826 | 9.8873695 |
| <b>B7LAC9</b> | TY-2482_chromosome | + | 4808145 | 4808489 | 1728.763663 | 1995.886463 | 2051.516598 | 494.3828529 | 396.6102564  | 647.8950134 | 1.942251815  | 16.57911412 | 15.383661 |
| <b>B7LAD0</b> | TY-2482_chromosome | + | 4808492 | 4810255 | 16848.75077 | 16483.30913 | 18146.69902 | 3121.73282  | 2047.408787  | 3243.892501 | 2.636456763  | 9.179817993 | 8.2942588 |
| <b>B7LAD1</b> | TY-2482_chromosome | + | 4810274 | 4810987 | 9314.35773  | 8884.484378 | 9189.800155 | 1298.445554 | 1089.229219  | 1348.303843 | 2.889951959  | 12.09302923 | 11.065127 |
| <b>B7LAD2</b> | TY-2482_chromosome | + | 4811191 | 4813989 | 33765.75341 | 31350.7921  | 31903.1404  | 11628.69564 | 7360.234596  | 14986.57813 | 1.568040496  | 3.304331538 | 2.8299611 |
| <b>B7LAD3</b> | TY-2482_chromosome | + | 4814007 | 4815221 | 27987.236   | 24839.5277  | 26429.17429 | 13250.3459  | 8532.416017  | 14671.17375 | 1.159167609  | 2.08805455  | 1.7492706 |
| <b>B7LAD4</b> | TY-2482_chromosome | + | 4815318 | 4816481 | 24813.99906 | 24300.79906 | 26155.96283 | 12177.52412 | 7107.264773  | 11767.81609 | 1.281850815  | 2.584385112 | 2.1922112 |
| <b>B7LAD5</b> | TY-2482_chromosome | + | 4816484 | 4817350 | 19209.65928 | 19576.43779 | 20433.02493 | 9355.50002  | 6180.884432  | 8801.252889 | 1.273780435  | 2.725178714 | 2.3187734 |
| <b>B7LAD6</b> | TY-2482_chromosome | - | 4817460 | 4818179 | 155.0743131 | 115.1621601 | 133.972405  | 110.6613975 | 111.115406   | 69.06875059 | 0.470116609  | 1.527486218 | 1.2590757 |
| <b>B7LAD7</b> | TY-2482_chromosome | + | 4818288 | 4820261 | 19.76978808 | 7.497195094 | 15.17331228 | 36.6033844  | 31.89123384  | 17.72507217 | -0.949022946 | 2.454503941 | 2.076419  |
| <b>B7LAD8</b> | TY-2482_chromosome | + | 4820282 | 4822912 | 145.7565426 | 166.2260822 | 138.4230493 | 165.0203183 | 148.3081257  | 146.1726256 | -0.097887247 | 0.060310666 | 0.0262374 |
| <b>B7LAE0</b> | TY-2482_chromosome | + | 4823762 | 4825327 | 15582.9869  | 12249.65615 | 13606.70752 | 86405.60497 | 67184.42234  | 88042.02666 | -2.497559324 | 7.810559953 | 7.0061273 |
| <b>B7LAE1</b> | TY-2482_chromosome | + | 4825346 | 4826482 | 7459.251105 | 5645.526495 | 6433.92413  | 57991.66898 | 46156.77836  | 59907.59647 | -3.012686433 | 10.88443976 | 9.9161756 |
| <b>B7LAE2</b> | TY-2482_chromosome | + | 4826613 | 4826903 | 899.171403  | 727.6218084 | 755.7995984 | 5351.750876 | 4531.047711  | 5551.700901 | -2.66035013  | 11.83770775 | 10.820827 |
| <b>B7LAE3</b> | TY-2482_chromosome | + | 4827056 | 4827457 | 316.2839199 | 322.0699774 | 324.840856  | 327.4276374 | 426.040264   | 323.9204059 | -0.160240189 | 0.359897811 | 0.2719116 |
| <b>B7LAE4</b> | TY-2482_chromosome | + | 4827457 | 4828146 | 502.5972675 | 454.3355137 | 501.8407581 | 1033.39027  | 1250.481108  | 1130.158188 | -1.181544284 | 9.26512738  | 8.375897  |
| <b>B7LAE5</b> | TY-2482_chromosome | + | 4828153 | 4828578 | 298.3432184 | 308.9278733 | 298.3663763 | 613.8784666 | 647.0439643  | 668.2528644 | -1.087562452 | 7.276965342 | 6.5063607 |
| <b>B7LAE6</b> | TY-2482_chromosome | + | 4828646 | 4829968 | 984.1680453 | 943.2419646 | 980.4537007 | 1235.749142 | 1276.771445  | 1437.739582 | -0.405407629 | 1.501165678 | 1.2364468 |
| <b>B7LAE7</b> | TY-2482_chromosome | + | 4830044 | 4831333 | 7834.571444 | 6497.482305 | 6963.412279 | 11528.9342  | 10656.67099  | 10851.25784 | -0.610244594 | 0.98320225  | 0.7884952 |
| <b>Q1REI4</b> | TY-2482_chromosome | - | 4831308 | 4831922 | 13850.04369 | 12480.81561 | 13642.47553 | 16959.35785 | 16076.037    | 16213.69771 | -0.280458312 | 0.341739716 | 0.2573509 |
| <b>B7LAE9</b> | TY-2482_chromosome | + | 4831902 | 4832690 | 4988.873228 | 4449.692238 | 5126.201641 | 6976.633023 | 5628.566949  | 6651.674788 | -0.374226481 | 0.540880416 | 0.4174615 |
| <b>lysV</b>   | TY-2482_chromosome | + | 4832858 | 4832933 | 3151.445205 | 3385.800193 | 2616.07259  | 1559.937827 | 2705.069672  | 1194.161154 | 0.663400663  | 1.317082284 | 1.0770314 |
| <b>valY</b>   | TY-2482_chromosome | + | 4832969 | 4833044 | 2523.410179 | 2382.231844 | 1976.316953 | 1422.064461 | 2372.871498  | 1103.337603 | 0.43995738   | 1.018396681 | 0.8181418 |
| <b>lysV</b>   | TY-2482_chromosome | + | 4833048 | 4833123 | 1761.314907 | 1599.977948 | 1534.183168 | 1049.886906 | 1407.1336104 | 909.6122202 | 0.528080359  | 1.889769947 | 1.5761351 |
| <b>valY</b>   | TY-2482_chromosome | + | 4833273 | 4833348 | 491.9672362 | 517.7685119 | 531.5613048 | 515.7295376 | 861.2398745  | 444.0691523 | -0.252523996 | 0.508629869 | 0.3913624 |
| <b>lysV</b>   | TY-2482_chromosome | + | 4833353 | 4833428 | 335.7424071 | 322.700634  | 355.9871852 | 373.3466132 | 546.2659901  | 333.3897141 | -0.291689666 | 0.768658995 | 0.6087255 |
| <b>lysV</b>   | TY-2482_chromosome | + | 4833575 | 4833650 | 169.634719  | 187.5791718 | 180.236006  | 212.5998094 | 248.5147989  | 213.2855076 | -0.343714014 | 0.985815059 | 0.7905116 |
| <b>lysV</b>   | TY-2482_chromosome | + | 4833684 | 4833759 | 62.12437802 | 79.16646349 | 40.87835693 | 112.2535442 | 127.48868    | 98.98450789 | -1.053975947 | 3.867777992 | 3.3374774 |
| <b>lysV</b>   | TY-2482_chromosome | + | 4833793 | 4833868 | 34.73445441 | 32.38740076 | 17.82997727 | 53.02953239 | 69.29917346  | 46.4248017  | -1.078164943 | 3.484346673 | 2.9917271 |
| <b>B7LAF1</b> | TY-2482_chromosome | + | 4834117 | 4835157 | 165.3769473 | 133.1743429 | 166.5410352 | 165.3079169 | 85.46951589  | 105.0389223 | 0.772737741  | 3.307915679 | 2.8329775 |
| <b>B7LAF2</b> | TY-2482_chromosome | + | 4835198 | 4835914 | 225.0720005 | 231.6356269 | 221.0929784 | 120.5196901 | 126.4439432  | 160.0787547 | 0.767542857  | 3.593754774 | 3.0894414 |
| <b>B7LAF3</b> | TY-2482_chromosome | - | 4835917 | 4836855 | 360.510009  | 330.4984144 | 353.9013347 | 186.8979297 | 204.7536358  | 223.448967  | 0.814486864  | 3.979246853 | 3.440146  |
| <b>B7LAF4</b> | TY-2482_chromosome | + | 4836972 | 4837349 | 346.8080214 | 358.8007769 | 425.5343773 | 374.5545735 | 594.5408466  | 343.9455145 | -0.190246342 | 0.450927524 | 0.3440067 |
| <b>D6J868</b> | TY-2482_chromosome | - | 4837438 | 4837662 | 201.219801  | 232.0850392 | 152.5806137 | 102.8244467 | 131.1451001  | 108.0295568 | 0.689607506  | 3.489303384 | 2.9957824 |
| <b>B7LAF5</b> | TY-2482_chromosome | + | 4837665 | 4838714 | 3492.998307 | 3753.001241 | 3937.11972  | 2445.720117 | 2209.546871  | 2440.40454  | 0.656303198  | 1.177320137 | 0.9566872 |
| <b>B7LAF6</b> | TY-2482_chromosome | - | 4838878 | 4839627 | 9676.950351 | 9978.828057 | 10258.12632 | 11869.08816 | 12164.70149  | 10301.56095 | -0.217895605 | 0.122691681 | 0.1576189 |
| <b>B7LAF7</b> | TY-2482_chromosome | - | 4839835 | 4840872 | 3405.700134 | 3204.883728 | 3323.60462  | 3933.736857 | 3649.238135  | 4305.79289  | -0.231469859 | 0.324053393 | 0.2438051 |
| <b>B7LAF8</b> | TY-2482_chromosome | - | 4840869 | 4842014 | 2065.508617 | 2014.761392 | 2120.061826 | 2318.965292 | 1818.13178   | 2605.812414 | -0.091133784 | 0.154996716 | 0.1133851 |
| <b>B7LAF9</b> | TY-2482_chromosome | - | 4842021 | 4843064 | 1188.29551  | 1215.602769 | 1160.597114 | 1713.55491  | 1201.982043  | 1925.543575 | -0.436416321 | 1.364368017 | 1.1181544 |
| <b>B7LAG0</b> | TY-2482_chromosome | - | 4843077 | 4844090 | 1362.638578 | 1288.211974 | 1263.568821 | 1969.564194 | 1567.872363  | 2232.174665 | -0.537899883 | 2.120731733 | 1.7781367 |

|               |                    |   |         |         |             |             |             |             |             |             |              |             |           |
|---------------|--------------------|---|---------|---------|-------------|-------------|-------------|-------------|-------------|-------------|--------------|-------------|-----------|
| <b>B7LAG1</b> | TY-2482_chromosome | - | 4844354 | 4845823 | 3019.809033 | 2882.753525 | 2930.079621 | 3646.136195 | 3380.783307 | 3826.989942 | -0.281958866 | 0.391469287 | 0.2966714 |
| <b>B7LAG3</b> | TY-2482_chromosome | - | 4845894 | 4846679 | 653.4882368 | 745.9465051 | 660.759577  | 469.5332597 | 427.6508213 | 510.2489061 | 0.522497356  | 2.097974233 | 1.7583591 |
| <b>B7LB71</b> | TY-2482_chromosome | + | 4847124 | 4847894 | 602.0065288 | 575.0282206 | 614.0720638 | 631.2133557 | 523.1714821 | 660.2164538 | 0.003946376  | 0.030504727 | 0.020494  |
| <b>B7LB72</b> | TY-2482_chromosome | + | 4847897 | 4848583 | 295.3206856 | 338.6286375 | 277.696156  | 258.7164726 | 227.4170631 | 291.7633136 | 0.192187136  | 0.571363133 | 0.4424733 |
| <b>B7LB73</b> | TY-2482_chromosome | + | 4848589 | 4849644 | 352.9156327 | 393.0460562 | 336.5055552 | 397.5233368 | 348.5026397 | 357.9456637 | -0.088992677 | 0.052832545 | 0.0374348 |
| <b>B5YRG4</b> | TY-2482_chromosome | - | 4849651 | 4850568 | 574.3113415 | 589.6901933 | 565.7394521 | 542.1098626 | 621.5728275 | 665.4784551 | -0.058410885 | 0.156985245 | 0.1149545 |
| <b>B7LB75</b> | TY-2482_chromosome | + | 4850621 | 4851613 | 2147.025526 | 2089.47551  | 2201.270762 | 2620.054411 | 2344.147684 | 3636.935538 | -0.349651971 | 0.617335937 | 0.4818668 |
| <b>B5YRG6</b> | TY-2482_chromosome | - | 4851660 | 4852610 | 27.37035912 | 44.00898636 | 32.92038097 | 20.76273173 | 28.29206853 | 22.47817609 | 0.45279768   | 1.100409059 | 0.8893058 |
| <b>B7LB80</b> | TY-2482_chromosome | + | 4853922 | 4855352 | 40.74228445 | 25.05480382 | 30.19987232 | 29.23234118 | 24.56615844 | 18.78721113 | 0.419420605  | 0.749480922 | 0.592699  |
| <b>B7LB81</b> | TY-2482_chromosome | + | 4855538 | 4857796 | 99.2772457  | 124.666833  | 104.1807011 | 93.25593538 | 65.44757301 | 60.90880371 | 0.453918903  | 1.983540849 | 1.6576425 |
| <b>B7LB82</b> | TY-2482_chromosome | - | 4858036 | 4859316 | 893.0708658 | 753.454285  | 835.8569377 | 1248.983811 | 1131.096272 | 1471.792151 | -0.569964954 | 2.620914788 | 2.2233321 |
| <b>B7LB83</b> | TY-2482_chromosome | - | 4859454 | 4860521 | 220.0250355 | 179.235617  | 206.0161377 | 214.3126023 | 212.0909103 | 163.5750871 | 0.044705622  | 0.065377709 | 0.4063147 |
| <b>C6V292</b> | TY-2482_chromosome | + | 4861167 | 4861766 | 77.72984321 | 84.38533911 | 75.12489925 | 40.98902689 | 43.79562028 | 21.72411767 | 1.054468564  | 5.246691086 | 4.603961  |
| <b>B7LB86</b> | TY-2482_chromosome | - | 4862303 | 4862611 | 40.47933861 | 25.7632038  | 43.90209117 | 11.49167362 | 7.230587986 | 6.784459169 | 2.156562726  | 9.417039807 | 8.5211222 |
| <b>B7LB88</b> | TY-2482_chromosome | - | 4862938 | 4863615 | 81.49406056 | 77.87857363 | 84.57710616 | 28.48310878 | 20.8512587  | 25.01395618 | 1.710019018  | 11.72211416 | 10.711129 |
| <b>B7LB89</b> | TY-2482_chromosome | - | 4863615 | 4864397 | 132.5812749 | 109.202233  | 112.7468123 | 28.96208325 | 22.66010302 | 31.37415608 | 2.126840671  | 18.28733393 | 17.047944 |
| <b>P03702</b> | TY-2482_chromosome | - | 4864406 | 4864774 | 62.12544685 | 54.97259916 | 60.76209724 | 7.05259397  | 11.94318746 | 5.541486545 | 2.8577777    | 19.16050935 | 17.897363 |
| <b>E2QKN0</b> | TY-2482_chromosome | - | 4864778 | 4865194 | 81.11870958 | 71.61513564 | 50.23023146 | 12.89916351 | 5.347542388 | 9.241239231 | 2.78661949   | 18.43510224 | 17.189056 |
| <b>B7LB92</b> | TY-2482_chromosome | - | 4865582 | 4866331 | 676.6539501 | 746.5609176 | 727.5946566 | 630.4336627 | 739.0915657 | 517.5226653 | 0.147087495  | 0.444162763 | 0.3390639 |
| <b>B7LB93</b> | TY-2482_chromosome | + | 4866374 | 4866601 | 109.2792321 | 100.8355312 | 98.9042118  | 42.44576267 | 65.75842208 | 32.17916416 | 1.117587481  | 5.633656123 | 4.9681874 |
| <b>B7LB99</b> | TY-2482_chromosome | + | 4869472 | 4870263 | 43.38590616 | 43.692502   | 40.82078062 | 23.09109689 | 35.80075603 | 3.495553948 | 0.909559697  | 2.371970021 | 2.0022133 |
| <b>B7LBA8</b> | TY-2482_chromosome | - | 4873704 | 4874783 | 82523.96452 | 82975.04898 | 87038.83509 | 16957.25022 | 13067.36466 | 12355.30306 | 2.530418524  | 7.983161908 | 7.1645495 |
| <b>B7LBB3</b> | TY-2482_chromosome | - | 4877597 | 4878019 | 46.21862183 | 51.41445598 | 52.91859417 | 14.11529704 | 15.59647062 | 1.908781687 | 2.108930014  | 11.46692808 | 10.47034  |
| <b>B7LBB6</b> | TY-2482_chromosome | + | 4879203 | 4880861 | 28.63249718 | 21.54111362 | 22.26816233 | 21.52648169 | 26.4510897  | 21.19848602 | 0.097936094  | 0.07751557  | 0.0560598 |
| <b>B7LBB9</b> | TY-2482_chromosome | + | 4881327 | 4882925 | 49.9373399  | 67.39631853 | 49.26310524 | 43.20686122 | 43.65246135 | 49.83061009 | 0.21433752   | 0.557194716 | 0.4311126 |
| <b>B7LBC1</b> | TY-2482_chromosome | + | 4884232 | 4884567 | 26.32781699 | 21.31040096 | 21.64048081 | 28.6792589  | 18.10470851 | 21.18359738 | 0.005848057  | 0           | 0         |
| <b>B7LBD0</b> | TY-2482_chromosome | + | 4889030 | 4891588 | 29.57041069 | 40.71498667 | 43.88713466 | 30.10888292 | 17.07679522 | 47.73425273 | 0.319315239  | 0.386025101 | 0.2928812 |
| <b>B7MSE1</b> | TY-2482_chromosome | + | 4893991 | 4895823 | 79.5599322  | 64.98078956 | 59.08635421 | 53.11731804 | 50.9188696  | 59.0476027  | 0.341401606  | 0.763505414 | 0.6048078 |
| <b>C8U2R4</b> | TY-2482_chromosome | + | 4895778 | 4897694 | 41.09940995 | 37.08974556 | 45.06043457 | 32.49150014 | 40.05826101 | 43.20717163 | 0.170743827  | 0.156785254 | 0.1148594 |
| <b>B7LBD7</b> | TY-2482_chromosome | + | 4899437 | 4901695 | 66.65901486 | 64.2335592  | 56.53630263 | 35.94623413 | 54.83674349 | 24.33519489 | 0.649290455  | 2.020910239 | 1.6897403 |
| <b>B7LBD9</b> | TY-2482_chromosome | - | 4902359 | 4903687 | 298.0333533 | 370.5275172 | 400.4342933 | 381.9856426 | 428.144352  | 19.95257411 | 0.172561772  | 0.340449742 | 0.2564074 |
| <b>B7LC55</b> | TY-2482_chromosome | - | 4904436 | 4904909 | 690.9727815 | 700.6272939 | 690.5629851 | 595.0427755 | 1061.452832 | 588.6573001 | -0.106906056 | 0.194264921 | 0.1432313 |
| <b>B7LC56</b> | TY-2482_chromosome | - | 4904971 | 4906257 | 104.9009563 | 76.75502354 | 97.79348183 | 79.55081991 | 74.60469735 | 73.76675315 | 0.352942262  | 0.810957778 | 0.6453489 |
| <b>B7LC57</b> | TY-2482_chromosome | + | 4906344 | 4907381 | 81.91243768 | 46.73328101 | 68.02649633 | 76.79724152 | 43.51026765 | 61.82708465 | 0.179620385  | 0.181861697 | 0.1344517 |
| <b>B7LC58</b> | TY-2482_chromosome | + | 4907381 | 4908532 | 63.87741323 | 38.67285562 | 55.51334298 | 57.37582127 | 41.74795638 | 55.1360502  | 0.126032799  | 0.069493887 | 0.0498339 |
| <b>B7LC59</b> | TY-2482_chromosome | + | 4908522 | 4909274 | 33.7922316  | 30.93172033 | 26.81578518 | 39.28847331 | 24.46520979 | 27.81390806 | -0.064878616 | 0           | 0         |
| <b>B7LC60</b> | TY-2482_chromosome | + | 4909270 | 4909944 | 37.52724111 | 33.70400692 | 30.81744525 | 27.24778232 | 16.25187279 | 24.88683826 | 0.55616761   | 1.326162853 | 1.0846209 |
| <b>B7LC61</b> | TY-2482_chromosome | + | 4910526 | 4912544 | 1628.158951 | 1438.276582 | 1535.680411 | 2381.449534 | 1989.279704 | 2348.26525  | -0.524265942 | 1.472735146 | 1.2115032 |
| <b>B7LC62</b> | TY-2482_chromosome | - | 4912742 | 4913647 | 424.6918996 | 430.4890184 | 455.6567675 | 452.4504457 | 489.6618873 | 417.2834059 | -0.053981581 | 0.098228389 | 0.0723512 |
| <b>B7LC63</b> | TY-2482_chromosome | + | 4914044 | 4915030 | 2968.245033 | 2805.397342 | 2769.576088 | 832.8588172 | 1011.061781 | 1182.284802 | 1.558311247  | 7.552050082 | 6.766606  |
| <b>B7LC64</b> | TY-2482_chromosome | + | 4915055 | 4915564 | 413.3709354 | 488.3516616 | 444.2846698 | 1505.705825 | 1517.928338 | 1715.350573 | -1.832712833 | 17.0882748  | 15.880716 |
| <b>B7LC65</b> | TY-2482_chromosome | + | 4915570 | 4916052 | 318.3308626 | 373.070888  | 382.4461348 | 1445.246756 | 1493.364401 | 1677.186083 | -2.091709318 | 24.69914198 | 23.295069 |
| <b>B7LC66</b> | TY-2482_chromosome | + | 4916048 | 4916290 | 159.3241357 | 145.1329142 | 159.8323797 | 772.6915989 | 800.7985011 | 960.0474131 | -2.385039266 | 28.21721253 | 26.761987 |
| <b>B7LC67</b> | TY-2482_chromosome | + | 4916295 | 4916744 | 303.7508444 | 224.2009366 | 319.8915889 | 1058.974261 | 1165.759865 | 1312.696482 | -1.933571557 | 20.14598118 | 18.853991 |
| <b>B7LC68</b> | TY-2482_chromosome | + | 4916884 | 4917585 | 2215.774425 | 2261.742403 | 2330.019799 | 1189.819583 | 1213.979704 | 1343.061691 | 0.884335163  | 4.660072745 | 4.0651036 |
| <b>B7LC71</b> | TY-2482_chromosome | - | 4919259 | 4920212 | 112.1280498 | 113.496428  | 115.555083  | 77.8421994  | 80.02025666 | 106.1010516 | 0.418949818  | 1.186794841 | 0.9634527 |
| <b>B7LC72</b> | TY-2482_chromosome | - | 4920215 | 4921453 | 301.2619937 | 311.9656732 | 334.2162113 | 228.5966776 | 227.5238902 | 209.3517045 | 0.505855367  | 1.991899542 | 1.6651943 |
| <b>B7LC73</b> | TY-2482_chromosome | - | 4921453 | 4922211 | 255.7257489 | 223.2832281 | 291.5122522 | 173.3142131 | 160.1000217 | 193.166073  | 0.6274945    | 2.144300493 | 1.7992435 |
| <b>B7LC74</b> | TY-2482_chromosome | + | 4922344 | 4922751 | 411.9149324 | 473.0133662 | 429.0688149 | 500.1020442 | 671.7718998 | 500.2287438 | -0.379067645 | 1.013622035 | 0.8142717 |
| <b>B7LC75</b> | TY-2482_chromosome | + | 4922719 | 4923822 | 331.3699199 | 326.8479877 | 292.2410607 | 444.8732834 | 552.4595721 | 530.1083185 | -0.674830408 | 3.010464186 | 2.5695471 |
| <b>B7LC76</b> | TY-2482_chromosome | - | 4923836 | 4924966 | 439.7731362 | 442.6858426 | 398.5664807 | 518.7860058 | 433.9666887 | 603.446888  | -0.277823338 | 0.75407053  | 0.5970154 |
| <b>B7LC77</b> | TY-2482_chromosome | - | 4924962 | 4926695 | 1283.245329 | 1242.25465  | 1368.799097 | 1522.000996 | 1076.433934 | 1439.118505 | -0.043454351 | 0.092633627 | 0.0678395 |
| <b>B7LC78</b> | TY-2482_chromosome | - | 4926691 | 4927686 | 1207.769905 | 1103.556949 | 1259.87132  | 1305.883727 | 901.6823521 | 1311.368019 | 0.052616927  | 0.035788152 | 0.0421266 |
| <b>D3GZ40</b> | TY-2482_chromosome | - | 4927689 | 4928369 | 471.3708643 | 410.0519606 | 383.9753562 | 274.2442041 | 283.8896132 | 341.715065  | 0.531338366  | 1.748897698 | 1.4554143 |
| <b>B7LC80</b> | TY-2482_chromosome | + | 4928586 | 4929947 | 1060.347974 | 1023.589082 | 1197.257597 | 1900.586612 | 1593.38107  | 2112.540177 | -0.723154038 | 3.618005688 | 3.1103363 |
| <b>B7LC81</b> | TY-2482_chromosome | - | 4930185 | 4930664 | 153.9459744 | 162.3209443 | 167.1129105 | 134.7711065 | 136.5545742 | 108.2471914 | 0.317969947  | 1.076460836 | 0.8689016 |
| <b>B7LC82</b> | TY-2482_chromosome | + | 4930784 | 4932931 | 1763.461646 | 1692.523048 | 1651.791868 | 1571.520395 | 1415.958051 | 1720.58374  | 0.131358303  | 0.248035651 | 0.1841862 |

|               |                    |   |         |         |             |             |             |             |             |             |              |             |           |
|---------------|--------------------|---|---------|---------|-------------|-------------|-------------|-------------|-------------|-------------|--------------|-------------|-----------|
| <b>B7LC83</b> | TY-2482_chromosome | + | 4932962 | 4933921 | 1141.165706 | 1064.921723 | 1240.788901 | 1506.003336 | 1192.94538  | 1590.293424 | -0.272383259 | 0.869888582 | 0.6935594 |
| <b>B7LC84</b> | TY-2482_chromosome | + | 4934065 | 4935147 | 754.3573473 | 842.2079825 | 890.1864276 | 539.1716308 | 462.1988017 | 600.9218014 | 0.649297997  | 2.719858192 | 2.314577  |
| <b>B7LC85</b> | TY-2482_chromosome | - | 4935382 | 4935639 | 327.4437072 | 377.4242366 | 322.6679421 | 336.3053501 | 517.9887037 | 413.1867358 | -0.316520053 | 0.790760538 | 0.6280678 |
| <b>C6V2G3</b> | TY-2482_chromosome | - | 4935885 | 4936259 | 154.7589259 | 157.2112199 | 157.789277  | 69.47929118 | 110.4630186 | 36.50527502 | 1.058123795  | 4.662704089 | 4.067067  |
| <b>B7LC87</b> | TY-2482_chromosome | - | 4936247 | 4936921 | 61.27103833 | 57.5638722  | 67.51263889 | 37.46087989 | 41.0121933  | 30.57089308 | 0.781204685  | 2.855527727 | 2.431963  |
| <b>B7LC88</b> | TY-2482_chromosome | - | 4936966 | 4939245 | 140.6649727 | 131.7343059 | 130.6242344 | 77.67334967 | 74.6432001  | 62.14310561 | 0.884159179  | 5.316768098 | 4.6706811 |
| <b>B7LC90</b> | TY-2482_chromosome | + | 4940046 | 4940969 | 85.04685167 | 60.13994712 | 49.60826063 | 72.99803365 | 77.42165421 | 56.97082442 | -0.1111028   | 0.142963847 | 0.1043787 |
| <b>B7LC91</b> | TY-2482_chromosome | - | 4940972 | 4943194 | 293.1835341 | 286.0529801 | 279.1832311 | 280.2824958 | 262.9253766 | 332.5070702 | -0.003763323 | 0.044762282 | 0.0308389 |
| <b>B7LC92</b> | TY-2482_chromosome | - | 4943314 | 4944033 | 691.9369021 | 595.8954442 | 607.275332  | 1015.350367 | 1353.288967 | 1449.447459 | -0.932628643 | 6.157096293 | 5.4539191 |
| <b>B7LC93</b> | TY-2482_chromosome | - | 4944033 | 4944689 | 486.12931   | 464.052331  | 471.3637951 | 493.3719353 | 549.6139853 | 722.9814228 | -0.242119893 | 0.861972746 | 0.6870693 |
| <b>B7LC94</b> | TY-2482_chromosome | - | 4944831 | 4945574 | 1547.227069 | 1566.254384 | 1594.486035 | 1944.761203 | 1825.56278  | 1657.926533 | -0.228574548 | 0.506058083 | 0.3892468 |
| <b>C1HG03</b> | TY-2482_chromosome | - | 4945504 | 4945692 | 420.9913792 | 435.1405877 | 419.845162  | 304.6033135 | 344.975514  | 293.5792084 | 0.421493399  | 1.502077792 | 1.2688335 |
| <b>E2QIH9</b> | TY-2482_chromosome | - | 4945623 | 4945913 | 89.11058195 | 80.32302487 | 79.08585888 | 58.61041989 | 42.64280223 | 61.57744039 | 0.622130938  | 2.208468883 | 1.8581143 |
| <b>B7LC95</b> | TY-2482_chromosome | - | 4945981 | 4946481 | 8021.925074 | 8736.909689 | 8738.924232 | 8212.65976  | 10872.52167 | 8612.223961 | -0.118695945 | 0.119613798 | 0.087634  |
| <b>B5YSA5</b> | TY-2482_chromosome | - | 4946783 | 4947679 | 69.53790479 | 71.86266942 | 66.56601117 | 93.8333298  | 87.29984386 | 106.3315081 | -0.465353791 | 1.55874987  | 1.2873277 |
| <b>B7LC97</b> | TY-2482_chromosome | + | 4948020 | 4948532 | 28329.59681 | 28365.09572 | 28971.78098 | 34403.18687 | 38197.66811 | 31367.17273 | -0.287713396 | 0.299342594 | 0.2239888 |
| <b>B7LC98</b> | TY-2482_chromosome | - | 4948587 | 4950167 | 227.3759187 | 221.6516135 | 215.7966163 | 239.7202192 | 264.9088239 | 202.9795381 | -0.114191172 | 0.180655175 | 0.1334574 |
| <b>P75786</b> | TY-2482_chromosome | + | 4950241 | 4950507 | 644.5234979 | 730.5291069 | 647.5500098 | 193.5068543 | 446.3670931 | 216.3834129 | 1.224318979  | 5.742104659 | 5.06558   |
| <b>rybA</b>   | TY-2482_chromosome | - | 4950522 | 4950610 | 263.8094065 | 347.5958238 | 248.5240041 | 118.0659113 | 263.4281032 | 124.3119689 | 0.680146514  | 2.410595446 | 2.0383794 |
| <b>B7LC99</b> | TY-2482_chromosome | + | 4950753 | 4951217 | 202.2183402 | 311.6343726 | 260.8034181 | 152.7299442 | 152.8141425 | 202.1296326 | 0.567212255  | 2.194923506 | 1.8449951 |
| <b>B7LCA0</b> | TY-2482_chromosome | + | 4951217 | 4952332 | 263.052638  | 345.1655522 | 253.1848902 | 209.0285635 | 245.6968997 | 292.9428837 | 0.162864718  | 0.452470004 | 0.3451839 |
| <b>B7LCA1</b> | TY-2482_chromosome | - | 4952397 | 4953314 | 608.7342281 | 640.7147272 | 565.6080987 | 1066.625124 | 1287.704265 | 1566.366414 | -1.078075463 | 7.28988874  | 6.5187226 |
| <b>B7LCA2</b> | TY-2482_chromosome | + | 4953533 | 4955122 | 1799.247586 | 1805.927197 | 1872.472995 | 2559.978554 | 2164.906849 | 2730.967817 | -0.429367613 | 0.825338342 | 0.6566534 |
| <b>B7LF78</b> | TY-2482_chromosome | + | 4955404 | 4956381 | 540.6081756 | 576.6605117 | 555.8808987 | 584.985487  | 515.8749771 | 736.2113526 | -0.112037889 | 0.277717793 | 0.2078281 |
| <b>B7LCA4</b> | TY-2482_chromosome | - | 4956643 | 4957905 | 426.2784833 | 424.9911745 | 409.2437834 | 336.76036   | 328.4746056 | 386.5433852 | 0.275917831  | 0.706323208 | 0.5548334 |
| <b>B7LCA5</b> | TY-2482_chromosome | - | 4958060 | 4958872 | 275.1465107 | 275.9378145 | 289.2460315 | 269.5909802 | 323.1150607 | 311.7375095 | -0.073895382 | 0.21497823  | 0.1588853 |
| <b>B7LCA6</b> | TY-2482_chromosome | + | 4959021 | 4961450 | 111.5112629 | 103.4200571 | 102.2221245 | 80.98300553 | 70.94999714 | 69.87688323 | 0.498876289  | 1.962304595 | 1.6382162 |
| <b>B7LCA8</b> | TY-2482_chromosome | + | 4962486 | 4963145 | 180.8772224 | 183.3356049 | 200.1983375 | 87.59912281 | 100.9963303 | 120.6485064 | 0.931382064  | 4.725984478 | 4.1231626 |
| <b>B7LCA9</b> | TY-2482_chromosome | - | 4963239 | 4963985 | 892.8373667 | 937.4586517 | 926.9667885 | 817.090371  | 662.3994803 | 852.2806742 | 0.238703544  | 0.667900614 | 0.5229699 |
| <b>B7LCB0</b> | TY-2482_chromosome | - | 4963988 | 4965220 | 1674.395239 | 1671.826566 | 1665.73552  | 1607.885631 | 1192.922991 | 1653.439094 | 0.171069837  | 0.38462977  | 0.2919192 |
| <b>B7LCB1</b> | TY-2482_chromosome | + | 4965424 | 4966386 | 1389.320078 | 1585.938381 | 1491.447866 | 380.9744371 | 331.1774784 | 391.9073647 | 1.991587899  | 23.16340091 | 21.796311 |
| <b>B7LCB2</b> | TY-2482_chromosome | + | 4966409 | 4968244 | 1803.830826 | 1800.254545 | 1653.695763 | 607.0762532 | 464.9110728 | 586.6262985 | 1.639630257  | 14.26821805 | 13.15418  |
| <b>B7LCB3</b> | TY-2482_chromosome | + | 4968267 | 4969802 | 1332.564902 | 1421.496264 | 1363.998687 | 805.7295383 | 687.8724949 | 961.2562206 | 0.758747445  | 3.388289776 | 2.906192  |
| <b>B7LCB4</b> | TY-2482_chromosome | + | 4969823 | 4970740 | 494.9457645 | 540.5352989 | 525.5486494 | 309.286669  | 270.1852379 | 349.6367279 | 0.75145862   | 3.516570937 | 3.0206849 |
| <b>B7LCB5</b> | TY-2482_chromosome | + | 4970746 | 4971654 | 308.6346936 | 374.946895  | 343.9700931 | 210.053943  | 232.1125882 | 204.0795166 | 0.626605325  | 3.06869733  | 2.6210061 |
| <b>B7LCB6</b> | TY-2482_chromosome | + | 4971835 | 4974180 | 99.24941486 | 138.8001976 | 96.70944473 | 86.45447121 | 79.21862453 | 53.21845414 | 0.43813626   | 1.994957154 | 1.667259  |
| <b>B7LCB7</b> | TY-2482_chromosome | + | 4974191 | 4975516 | 130.3013003 | 130.32906   | 95.8872512  | 62.94374325 | 82.0673107  | 49.19650756 | 0.795395676  | 3.857793958 | 3.3281382 |
| <b>B7LCB8</b> | TY-2482_chromosome | - | 4975569 | 4976891 | 273.7000971 | 270.6631557 | 271.9870878 | 734.7447634 | 739.8426032 | 810.2711503 | -1.466904678 | 12.5061675  | 11.457482 |
| <b>B7LCB9</b> | TY-2482_chromosome | + | 4977104 | 4977484 | 2102.098107 | 2227.767405 | 2143.735141 | 45.73846142 | 36.37372208 | 30.62297596 | 5.771770533  | 102.866334  | 99.98514  |
| <b>B7LCC0</b> | TY-2482_chromosome | + | 4977598 | 4978710 | 260.894839  | 265.7081291 | 287.3399984 | 161.8772286 | 203.0160997 | 182.8919466 | 0.604005124  | 2.32842322  | 1.9648645 |
| <b>B7LCC1</b> | TY-2482_chromosome | - | 4978713 | 4979336 | 411.0779052 | 508.6606955 | 454.8561078 | 790.5127809 | 840.8852591 | 874.7818915 | -0.896921645 | 4.691535477 | 4.0928867 |
| <b>B7LCC2</b> | TY-2482_chromosome | + | 4979583 | 4980782 | 1518.815018 | 1535.326932 | 1554.86021  | 1359.861669 | 1318.58632  | 1682.258345 | 0.115705448  | 0.155325346 | 0.113609  |
| <b>B7LCC3</b> | TY-2482_chromosome | - | 4980835 | 4981590 | 541.5247702 | 512.7801445 | 491.0529858 | 573.6836524 | 692.6160892 | 630.2140381 | -0.280963649 | 0.813840516 | 0.6475345 |
| <b>B7LCC4</b> | TY-2482_chromosome | - | 4981651 | 4982244 | 343.3315941 | 339.7075977 | 303.4658533 | 269.8866849 | 405.0738707 | 390.4969642 | -0.073143797 | 0.214371653 | 0.1587116 |
| <b>B7LCC5</b> | TY-2482_chromosome | + | 4982529 | 4983758 | 177.4317963 | 121.3857486 | 179.2167379 | 165.9172281 | 174.7032243 | 198.4174335 | -0.043687195 | 0.358087154 | 0.2704503 |
| <b>B7LD36</b> | TY-2482_chromosome | - | 4983805 | 4984086 | 78.53683796 | 72.8330336  | 79.27059198 | 74.62678138 | 101.1692139 | 68.78014999 | -0.068963318 | 0.14525871  | 0.1060196 |
| <b>B7LD37</b> | TY-2482_chromosome | - | 4984175 | 4984987 | 145.0569045 | 139.6814125 | 150.604124  | 227.3715707 | 214.766501  | 200.1643311 | -0.562858815 | 2.382201179 | 2.0115518 |
| <b>B7LD38</b> | TY-2482_chromosome | - | 4984990 | 4986195 | 99.67342158 | 87.83544183 | 78.92594946 | 129.5392952 | 125.6069074 | 106.8612906 | -0.473468609 | 1.479966353 | 1.2182132 |
| <b>B7LD39</b> | TY-2482_chromosome | + | 4986279 | 4986812 | 51.20943465 | 84.65502123 | 63.95496453 | 38.88325291 | 38.24723152 | 30.55355291 | 0.750175943  | 3.103701286 | 2.6509117 |
| <b>B7LD40</b> | TY-2482_chromosome | - | 4986993 | 4988675 | 844.3192779 | 824.5251001 | 829.2143485 | 581.732424  | 627.0499747 | 597.3364534 | 0.476528814  | 1.742071002 | 1.4493351 |
| <b>B7LD41</b> | TY-2482_chromosome | + | 4988945 | 4989319 | 404.5923986 | 404.3453504 | 386.7859942 | 153.5806042 | 188.5178349 | 129.3793843 | 1.313599742  | 9.933171057 | 9.0046077 |
| <b>B7LD42</b> | TY-2482_chromosome | - | 4989355 | 4989609 | 90.26709945 | 135.2877592 | 82.03329338 | 49.36612241 | 51.01216324 | 38.50421802 | 0.967486218  | 5.355281377 | 4.7066596 |
| <b>B7LD43</b> | TY-2482_chromosome | + | 4989769 | 4990053 | 371.6388618 | 368.6758338 | 382.9726169 | 364.177895  | 438.7040428 | 407.8387153 | -0.081132726 | 0.222887214 | 0.1651671 |
| <b>B7LD44</b> | TY-2482_chromosome | + | 4990040 | 4990759 | 1108.145531 | 1162.028522 | 1269.167487 | 1329.210108 | 1195.729542 | 1428.552402 | -0.136892081 | 0.26316686  | 0.2745976 |
| <b>B7LD45</b> | TY-2482_chromosome | + | 4990823 | 4991722 | 862.8204823 | 899.5948708 | 1041.501116 | 937.0367773 | 952.8074784 | 1002.41655  | -0.009560344 | 0.086419412 | 0.0632607 |
| <b>B7LD46</b> | TY-2482_chromosome | + | 4991813 | 4992286 | 489.738379  | 520.1254753 | 513.6682377 | 369.0329753 | 367.6457281 | 377.5642953 | 0.445546264  | 1.613439992 | 1.3370115 |
| <b>B7LD47</b> | TY-2482_chromosome | + | 4992641 | 4993750 | 121.9238264 | 111.6039182 | 122.8598422 | 106.8004926 | 104.5793495 | 139.0111611 | 0.091408603  | 0.05214278  | 0.0369402 |

|        |                    |   |         |         |             |             |             |             |             |             |              |             |            |
|--------|--------------------|---|---------|---------|-------------|-------------|-------------|-------------|-------------|-------------|--------------|-------------|------------|
| B7LD48 | TY-2482_chromosome | + | 4993848 | 4994978 | 75.42797795 | 63.89609313 | 95.57759654 | 82.78361793 | 65.39767553 | 94.3633535  | 0.05631469   | 0.038862599 | 0.0265085  |
| C8UL80 | TY-2482_chromosome | + | 4994991 | 4995941 | 62.9516526  | 54.74639147 | 55.33234962 | 41.95592509 | 40.91949201 | 45.93553877 | 0.453347902  | 1.170711948 | 0.9513302  |
| B7LD50 | TY-2482_chromosome | + | 4995941 | 4996783 | 74.5851659  | 91.69403692 | 83.17477945 | 57.78376301 | 64.68568894 | 48.99615313 | 0.479901555  | 1.78590148  | 1.4844907  |
| B7LD51 | TY-2482_chromosome | + | 4996846 | 4997331 | 101.2005056 | 85.5446024  | 79.60274863 | 79.35490641 | 101.1653209 | 64.93875794 | 0.102129924  | 0.205621686 | 0.1520119  |
| B7LD52 | TY-2482_chromosome | + | 4997375 | 4998499 | 107.7142949 | 103.3621617 | 104.2671299 | 198.0535277 | 181.1342752 | 154.19652   | -0.717239785 | 3.480147156 | 2.96881189 |
| B7LD53 | TY-2482_chromosome | - | 4998680 | 4999408 | 231.1617875 | 224.0288433 | 206.4516373 | 348.0522631 | 402.3601    | 287.2608991 | -0.685195679 | 2.737270011 | 2.3290757  |
| B7LD54 | TY-2482_chromosome | - | 4999703 | 5000368 | 1204.733095 | 1185.311755 | 1247.900814 | 743.6849435 | 822.6554144 | 981.0447129 | 0.57090069   | 1.884367286 | 1.571179   |
| B7LD55 | TY-2482_chromosome | - | 5000371 | 5001084 | 1328.152722 | 1344.466796 | 1290.663679 | 1128.692042 | 1088.339024 | 1405.960691 | 0.155973888  | 0.272607409 | 0.2037692  |
| B7LD56 | TY-2482_chromosome | - | 5001094 | 5001822 | 2121.711273 | 1993.974922 | 1938.305529 | 2829.110667 | 2889.413363 | 2870.69074  | -0.500199802 | 0.835428592 | 0.6642105  |
| B7LD57 | TY-2482_chromosome | - | 5001843 | 5002568 | 1238.583018 | 1110.69529  | 1081.278139 | 1129.368004 | 1275.023905 | 1194.616104 | -0.051457904 | 0.133165387 | 0.0972348  |
| B7LD58 | TY-2482_chromosome | - | 5002789 | 5003301 | 995.4333866 | 920.2486988 | 963.2646709 | 702.7789567 | 913.723351  | 994.2368688 | 0.214367618  | 0.32175072  | 0.2419399  |
| B7LD59 | TY-2482_chromosome | + | 5003427 | 5003747 | 839.6731621 | 959.9027626 | 882.0080755 | 512.97325   | 449.487679  | 526.1104402 | 0.819285037  | 4.576784475 | 3.9904236  |
| B7LD60 | TY-2482_chromosome | + | 5003747 | 5004574 | 1410.257808 | 1524.901791 | 1601.877091 | 859.1119277 | 686.9605704 | 912.7508738 | 0.892518227  | 4.586908761 | 3.999813   |
| B7LD61 | TY-2482_chromosome | - | 5004577 | 5005587 | 454.6250121 | 481.3015335 | 454.8207134 | 436.5297047 | 410.341242  | 542.9059985 | 0.018619752  | 0.000178585 | 0          |
| B7LD62 | TY-2482_chromosome | - | 5005689 | 5007116 | 640.8918655 | 613.6495857 | 654.3461125 | 969.0664999 | 988.2614641 | 1202.10593  | -0.67490555  | 3.716703209 | 3.1978656  |
| B7LD63 | TY-2482_chromosome | - | 5007130 | 5008128 | 1122.431842 | 1176.972244 | 1153.40853  | 2084.399292 | 1916.494536 | 2294.199598 | -0.86105633  | 4.648595686 | 4.055203   |
| B7LD64 | TY-2482_chromosome | - | 5008168 | 5009883 | 1507.549801 | 1561.063994 | 1610.380526 | 3645.392709 | 3124.077018 | 4405.504724 | -1.223269373 | 3.320756989 | 2.8443963  |
| B7LD65 | TY-2482_chromosome | - | 5010019 | 5010984 | 191.462117  | 159.0836571 | 211.5953072 | 241.6181163 | 130.811215  | 222.0564095 | -0.032508872 | 0.126524431 | 0.0928189  |
| B7LD66 | TY-2482_chromosome | - | 5010999 | 5012648 | 191.3886692 | 178.8618965 | 213.4922869 | 859.5969174 | 537.6540081 | 737.9871757 | -1.862477596 | 15.79796115 | 14.625754  |
| B7LD67 | TY-2482_chromosome | - | 5012795 | 5013691 | 126.1089824 | 91.31734442 | 84.06963986 | 184.5454575 | 175.6062315 | 186.7822509 | -0.833910936 | 4.318616984 | 3.752693   |
| C6V2L9 | TY-2482_chromosome | - | 5013842 | 5014126 | 154.6291556 | 99.83256075 | 101.9351528 | 35.49385766 | 46.59784957 | 20.41837198 | 1.792892202  | 10.81007785 | 9.8453374  |
| B7LD68 | TY-2482_chromosome | - | 5014189 | 5014881 | 129.9452075 | 139.3984791 | 154.7213228 | 204.874514  | 230.3287879 | 177.9546937 | -0.537504306 | 2.044583042 | 1.7107531  |
| B7LD69 | TY-2482_chromosome | + | 5015307 | 5016962 | 1106.029688 | 1110.276085 | 1106.522431 | 868.2590836 | 786.2274967 | 868.2440962 | 0.395128971  | 1.416035103 | 1.1633999  |
| B7LD70 | TY-2482_chromosome | + | 5016965 | 5017954 | 1881.598084 | 1805.988919 | 1815.587223 | 675.3276833 | 784.4518491 | 910.0115151 | 1.269594827  | 8.038124255 | 7.2144692  |
| B7LD71 | TY-2482_chromosome | + | 5018069 | 5019181 | 317.072688  | 311.9541307 | 317.562552  | 401.3035602 | 342.0790354 | 431.2762412 | -0.296248054 | 0.902374926 | 0.7208738  |
| B7LD72 | TY-2482_chromosome | + | 5019181 | 5021124 | 352.8695953 | 403.3022    | 351.0825308 | 470.6954241 | 516.9336425 | 501.2489535 | -0.459217395 | 1.435230732 | 1.1796917  |
| Q1RE42 | TY-2482_chromosome | - | 5021301 | 5021582 | 884.59534   | 919.6664105 | 948.1671026 | 726.5673344 | 1072.249919 | 733.1698435 | 0.128177108  | 0.254095712 | 0.1889216  |
| B7LD74 | TY-2482_chromosome | + | 5021747 | 5022064 | 1113.451904 | 1243.077438 | 1079.289692 | 472.7766173 | 469.5642654 | 494.6104314 | 1.223537176  | 9.898851045 | 8.9727027  |
| B7LD75 | TY-2482_chromosome | + | 5022098 | 5024371 | 10059.06139 | 10468.33439 | 11087.45144 | 7608.312643 | 6327.488332 | 7652.781593 | 0.556042361  | 0.803707319 | 0.6387946  |
| B7LD76 | TY-2482_chromosome | - | 5025062 | 5025277 | 1821.118565 | 1679.755854 | 1610.78536  | 852.6981365 | 2299.368835 | 920.4596558 | 0.350281427  | 0.617114455 | 0.4817753  |
| B7LD77 | TY-2482_chromosome | - | 5025565 | 5026266 | 345.6512045 | 304.6851386 | 308.8643586 | 513.2455934 | 556.9266159 | 640.3946366 | -0.782000055 | 4.292973016 | 3.7308847  |
| B7LD78 | TY-2482_chromosome | - | 5026311 | 5028029 | 1693.961771 | 1525.649264 | 1583.18183  | 2811.329455 | 2656.369695 | 3215.079787 | -0.814191764 | 1.944665567 | 1.6233778  |
| B7LD79 | TY-2482_chromosome | - | 5028033 | 5029796 | 879.1901225 | 1111.287164 | 996.9313595 | 1749.503482 | 1500.562718 | 1973.077096 | -0.836892    | 3.808279294 | 3.2818334  |
| B7LD80 | TY-2482_chromosome | - | 5029922 | 5030884 | 3487.362536 | 2947.872194 | 3121.502422 | 5264.869882 | 5353.819748 | 5567.620246 | -0.72161441  | 1.408112001 | 1.1566669  |
| E9VK05 | TY-2482_chromosome | + | 5031429 | 5031993 | 2348.914774 | 2239.299766 | 2543.404407 | 2903.352416 | 3401.90183  | 2414.629158 | -0.284437665 | 3.083283208 | 0.9027285  |
| C8U4H0 | TY-2482_chromosome | + | 5032058 | 5034307 | 3091.671881 | 2828.819561 | 2851.452842 | 3816.131927 | 3979.661502 | 3940.273042 | -0.402788049 | 0.617760839 | 0.4820365  |
| B7LD82 | TY-2482_chromosome | + | 5034287 | 5036005 | 2882.217679 | 2764.139483 | 2743.191258 | 4174.608999 | 4437.405874 | 4666.361813 | -0.640830233 | 1.169495855 | 0.9502718  |
| B7LD83 | TY-2482_chromosome | + | 5036160 | 5036771 | 1446.272732 | 1399.39532  | 1546.407943 | 2681.436145 | 2687.390496 | 2534.004268 | -0.833334633 | 2.868291431 | 2.4427032  |
| B7LD84 | TY-2482_chromosome | + | 5036785 | 5038125 | 1273.469341 | 1398.014473 | 1295.293456 | 2363.69009  | 2064.838566 | 2298.336951 | -0.793953676 | 3.722928525 | 3.2037766  |
| B7LD85 | TY-2482_chromosome | + | 5038219 | 5039508 | 9508.019972 | 9299.023533 | 9503.413097 | 8145.885797 | 8222.285889 | 9027.590633 | 0.179949886  | 0.163973674 | 0.1203677  |
| B7LD86 | TY-2482_chromosome | + | 5039750 | 5042191 | 6599.521154 | 7037.266406 | 7487.884884 | 194.5802095 | 147.2934141 | 199.7293147 | 5.291400323  | 32.54243759 | 30.993682  |
| A7ZJW5 | TY-2482_chromosome | - | 5042403 | 5043305 | 979.395213  | 1156.129977 | 1199.853774 | 122.3970754 | 77.15223901 | 133.7208799 | 3.32193076   | 40.89317817 | 39.136923  |
| Q1RDV9 | TY-2482_chromosome | - | 5043726 | 5044508 | 451.6450154 | 453.5977434 | 468.1430476 | 1038.100475 | 1229.569819 | 1014.560169 | -1.252493094 | 9.756087003 | 8.8368804  |
| B7LD90 | TY-2482_chromosome | + | 5044663 | 5045808 | 80.93462753 | 67.87369854 | 70.52379637 | 96.58411102 | 110.227391  | 74.16322497 | -0.364913241 | 0.964198061 | 0.7721645  |
| B7LD91 | TY-2482_chromosome | + | 5046021 | 5047496 | 45.74247229 | 35.02024678 | 43.63456516 | 99.06057484 | 65.3964269  | 77.73507625 | -0.942214598 | 4.044599565 | 3.5015295  |
| B7LD92 | TY-2482_chromosome | - | 5047503 | 5048408 | 61.23187766 | 66.66206033 | 64.02300198 | 44.46202607 | 50.06935347 | 49.94357353 | 0.409717797  | 1.38776114  | 0.9228499  |
| B7LD93 | TY-2482_chromosome | + | 5048508 | 5049095 | 42.2936822  | 62.63672555 | 54.18831014 | 36.72845473 | 30.06401269 | 15.16121596 | 0.788349835  | 2.984304442 | 2.5458511  |
| B7LD94 | TY-2482_chromosome | - | 5049183 | 5049920 | 1484.46508  | 1453.021829 | 1463.705484 | 863.1440501 | 1020.166861 | 1152.1205   | 0.586759267  | 2.031845444 | 1.6990405  |
| B7LD95 | TY-2482_chromosome | - | 5050115 | 5052394 | 40568.07899 | 37968.05497 | 38914.85681 | 112806.0324 | 82149.28032 | 115754.0677 | -1.390399918 | 2.875136865 | 2.4487873  |
| B7LD96 | TY-2482_chromosome | - | 5052452 | 5053306 | 7858.985052 | 8350.282552 | 7733.211141 | 5018.937626 | 4937.938762 | 4735.014684 | 0.67326309   | 1.187669075 | 0.9640086  |
| B7LD97 | TY-2482_chromosome | - | 5053714 | 5055471 | 1879.251928 | 1898.659131 | 1982.092295 | 2025.136727 | 2590.829336 | 3261.079001 | -0.561180015 | 1.045299733 | 0.8412559  |
| B7LD98 | TY-2482_chromosome | + | 5055601 | 5056290 | 488.0727066 | 586.6027592 | 584.4466312 | 437.4926252 | 439.5883169 | 373.9294326 | 0.363109688  | 1.334431766 | 1.0925578  |
| B7LD99 | TY-2482_chromosome | + | 5056492 | 5057577 | 3201.464122 | 3178.866379 | 3282.716025 | 5521.135425 | 5208.190606 | 5454.535004 | -0.739614665 | 1.365817347 | 1.1192681  |
| B7LDA0 | TY-2482_chromosome | + | 5057651 | 5058931 | 708.0379411 | 833.379003  | 738.695073  | 1811.924093 | 1553.352102 | 1987.603598 | -1.260604727 | 8.198359854 | 7.3592157  |
| B5YT43 | TY-2482_chromosome | + | 5059079 | 5059864 | 50.76907012 | 51.82739733 | 55.55290913 | 51.26117791 | 48.20613492 | 50.01365139 | 0.086977946  | 0.130216117 | 0.0950494  |
| B7LDA2 | TY-2482_chromosome | + | 5060040 | 5060720 | 1207.087444 | 1126.112368 | 1134.861602 | 1911.720451 | 1926.583076 | 1857.733349 | -0.710739591 | 3.41465744  | 2.9288516  |
| B7LDA3 | TY-2482_chromosome | + | 5060834 | 5062504 | 94743.76036 | 89914.41959 | 91574.53097 | 124200.1412 | 104510.2313 | 122166.5813 | -0.340370639 | 0.376791436 | 0.286234   |

|                |                    |   |         |         |             |             |             |             |             |             |              |             |           |
|----------------|--------------------|---|---------|---------|-------------|-------------|-------------|-------------|-------------|-------------|--------------|-------------|-----------|
| <b>A1A9I9</b>  | TY-2482_chromosome | - | 5062679 | 5062984 | 1555.596923 | 1555.225752 | 1328.730373 | 1829.470074 | 2222.464114 | 1707.990241 | -0.412720542 | 1.141935561 | 0.9256545 |
| <b>B7LDA5</b>  | TY-2482_chromosome | + | 5063158 | 5065419 | 142.6699415 | 173.747934  | 147.7536476 | 118.8784329 | 122.8833821 | 109.3778819 | 0.337162198  | 1.335382293 | 1.0933422 |
| <b>B7LDA6</b>  | TY-2482_chromosome | + | 5065459 | 5067204 | 1203.343407 | 1108.274509 | 1152.735977 | 2219.695738 | 1933.751985 | 2525.631216 | -0.910333934 | 5.24849217  | 4.6053439 |
| <b>B7LE13</b>  | TY-2482_chromosome | + | 5067204 | 5068187 | 1000.688104 | 937.9894568 | 930.8245002 | 1073.6324   | 997.3343819 | 1246.876284 | -0.179738175 | 0.509939732 | 0.3924229 |
| <b>B7LE14</b>  | TY-2482_chromosome | + | 5068227 | 5069456 | 364.9365322 | 375.7418627 | 348.4637634 | 372.2103634 | 356.6707684 | 439.0974595 | -0.092373211 | 0.20429262  | 0.1510057 |
| <b>A1A9J4</b>  | TY-2482_chromosome | - | 5069519 | 5069785 | 766.3362781 | 870.2080494 | 872.2689646 | 640.7288875 | 742.6537781 | 686.7899775 | 0.275688272  | 0.806320034 | 0.641129  |
| <b>E7H9E7</b>  | TY-2482_chromosome | + | 5069690 | 5070530 | 1600.194498 | 1782.171243 | 1803.201312 | 1506.272599 | 1588.921519 | 1804.758642 | 0.101416802  | 0.161263922 | 0.1182888 |
| <b>B7LE17</b>  | TY-2482_chromosome | + | 5070590 | 5071480 | 1802.317652 | 1634.189535 | 1856.04562  | 109.5783588 | 104.6015001 | 123.4595388 | 4.02166562   | 70.25645636 | 67.995051 |
| <b>B7LE18</b>  | TY-2482_chromosome | - | 5071463 | 5072239 | 391.1583722 | 343.9376005 | 404.8803727 | 97.05253914 | 96.42416016 | 111.6206097 | 1.96524668   | 18.99439847 | 17.736453 |
| <b>B7LE20</b>  | TY-2482_chromosome | + | 5072375 | 5073157 | 703.7557471 | 654.9620584 | 694.5809234 | 625.8219688 | 641.5957435 | 615.7851447 | 0.141562489  | 0.278785537 | 0.2082716 |
| <b>B7LE21</b>  | TY-2482_chromosome | + | 5073157 | 5074476 | 752.1934239 | 808.6831978 | 820.0811782 | 1278.115246 | 1095.619807 | 1270.784359 | -0.622204088 | 2.685248531 | 2.282861  |
| <b>B5YT57</b>  | TY-2482_chromosome | + | 5074433 | 5075161 | 772.6115224 | 701.3398107 | 726.8627289 | 961.284157  | 987.3882154 | 1073.388494 | -0.422212486 | 1.783294434 | 1.4824547 |
| <b>B7LE23</b>  | TY-2482_chromosome | + | 5075164 | 5079621 | 6248.209094 | 6068.928888 | 6128.261798 | 8381.181502 | 7003.63975  | 9141.902496 | -0.393325081 | 0.545750618 | 0.4211923 |
| <b>B7LE24</b>  | TY-2482_chromosome | + | 5079885 | 5081729 | 2497.640026 | 2607.053043 | 2830.607702 | 2149.461716 | 1974.748158 | 2266.65389  | 0.331405886  | 0.434177848 | 0.3312553 |
| <b>B7LE25</b>  | TY-2482_chromosome | + | 5081913 | 5082458 | 794.1508727 | 770.8874047 | 853.8277283 | 2726.995869 | 2367.000723 | 2351.173009 | -1.624257694 | 14.07726582 | 12.968149 |
| <b>B7LE26</b>  | TY-2482_chromosome | + | 5082488 | 5083132 | 1082.796583 | 1011.034961 | 1234.945986 | 3523.61381  | 3069.565125 | 3001.111113 | -1.508720351 | 5.963621327 | 5.2732254 |
| <b>B7LE511</b> | TY-2482_chromosome | - | 5083380 | 5084357 | 498.6822711 | 495.4181702 | 579.3020806 | 593.6146152 | 469.4185504 | 741.3876306 | -0.130907286 | 0.428806756 | 0.3272089 |
| <b>B7LE28</b>  | TY-2482_chromosome | - | 5084639 | 5085826 | 5794.118291 | 6287.325232 | 6286.80771  | 11320.62445 | 9911.271507 | 12573.03268 | -0.873299417 | 1.615120776 | 1.3383325 |
| <b>E7H9D3</b>  | TY-2482_chromosome | + | 5085813 | 5086011 | 438.8881734 | 508.5577736 | 417.617126  | 531.7548768 | 536.8867284 | 623.3415328 | -0.340490937 | 0.882794491 | 0.7048915 |
| <b>B7LE29</b>  | TY-2482_chromosome | - | 5086014 | 5087099 | 5930.243277 | 6071.633794 | 6630.252279 | 4069.048634 | 4212.65011  | 3907.506993 | 0.621104607  | 0.993953795 | 0.7974715 |
| <b>B7LE30</b>  | TY-2482_chromosome | - | 5087704 | 5089101 | 2986.420671 | 2473.631656 | 2375.894107 | 4134.55078  | 4279.947069 | 4726.81051  | -0.709107694 | 1.397360374 | 1.1465939 |
| <b>B7LE31</b>  | TY-2482_chromosome | - | 5089273 | 5090472 | 859.4881179 | 658.8971624 | 801.6006933 | 1137.21656  | 1131.129442 | 1399.438207 | -0.563769283 | 2.968963829 | 2.5315538 |
| <b>B7LE32</b>  | TY-2482_chromosome | + | 5090738 | 5093347 | 5055.186152 | 5766.77726  | 5754.041921 | 8551.84272  | 6919.87783  | 10286.25708 | -0.621557927 | 0.993338983 | 0.7971395 |
| <b>D8ESU4</b>  | TY-2482_chromosome | - | 5093334 | 5093564 | 249.0026525 | 279.3847647 | 222.8356349 | 313.9182587 | 287.5144641 | 330.0797942 | -0.360136796 | 0.924585414 | 0.7388727 |
| <b>B7LE33</b>  | TY-2482_chromosome | - | 5093560 | 5094324 | 55.43838117 | 49.49565804 | 50.07554539 | 56.71091597 | 39.91250655 | 56.38201887 | 0.027930536  | 0.013948399 | 0.0089993 |
| <b>B7LE35</b>  | TY-2482_chromosome | - | 5095126 | 5096268 | 26.74091818 | 30.88679202 | 33.1766353  | 40.95668086 | 29.93304414 | 38.09324068 | -0.27713698  | 0.44978029  | 0.3434677 |
| <b>B7LE36</b>  | TY-2482_chromosome | - | 5096268 | 5097224 | 24.65106378 | 19.57294077 | 28.64984435 | 37.31612595 | 21.71478526 | 27.73256008 | -0.220848421 | 0.33240327  | 0.2497444 |
| <b>B7LE40</b>  | TY-2482_chromosome | + | 5099499 | 5102096 | 71.79259566 | 72.09928287 | 69.23807748 | 66.42269266 | 42.68143132 | 39.88402663 | 0.432779095  | 1.448740465 | 1.1908877 |
| <b>B7LE41</b>  | TY-2482_chromosome | + | 5102090 | 5103157 | 68.11739894 | 75.71344831 | 53.0273476  | 68.11017216 | 60.09487762 | 40.0585481  | 0.08320328   | 0.380534008 | 0.2886853 |
| <b>B7LE44</b>  | TY-2482_chromosome | + | 5104230 | 5104937 | 74.76854991 | 58.88948902 | 87.56075812 | 43.43344625 | 51.09308258 | 28.20950621 | 0.889348603  | 3.132213592 | 2.6764447 |
| <b>B7LE45</b>  | TY-2482_chromosome | + | 5105051 | 5106058 | 461.4796158 | 418.1680435 | 451.6214169 | 852.0195233 | 777.1735766 | 710.6943985 | -0.817388118 | 4.17861913  | 3.6237606 |
| <b>B7LE46</b>  | TY-2482_chromosome | + | 5106235 | 5106774 | 853.6908117 | 1047.93332  | 1118.740935 | 980.2106349 | 1315.19741  | 923.9554859 | -0.104881639 | 0.173738277 | 0.1281288 |
| <b>B7LE47</b>  | TY-2482_chromosome | - | 5106777 | 5107883 | 384.3375692 | 404.0666729 | 382.190769  | 706.6334462 | 695.2659977 | 699.9362274 | -0.862328717 | 4.532739031 | 3.9489404 |
| <b>B7LE48</b>  | TY-2482_chromosome | + | 5108127 | 5110232 | 873.5188104 | 847.5907493 | 824.5229189 | 1680.346096 | 1516.931524 | 2185.962239 | -1.038659924 | 6.276293985 | 5.5663384 |
| <b>B7LE49</b>  | TY-2482_chromosome | + | 5110246 | 5112125 | 1886.675633 | 2021.850062 | 2028.287022 | 2922.483062 | 2346.883149 | 3264.968139 | -0.514303867 | 0.866656894 | 0.6906132 |
| <b>B7LE50</b>  | TY-2482_chromosome | + | 5112283 | 5113533 | 681.1831762 | 680.6344934 | 757.4724071 | 709.5146161 | 631.5482855 | 604.0751874 | 0.118091911  | 0.274598561 | 0.205258  |
| <b>B7LE51</b>  | TY-2482_chromosome | + | 5113541 | 5115178 | 1077.501407 | 1179.356076 | 1156.090968 | 1296.415862 | 1165.707111 | 1340.480007 | -0.16595978  | 0.355850827 | 0.268729  |
| <b>C8ULH5</b>  | TY-2482_chromosome | + | 5115178 | 5115738 | 462.7067252 | 545.2109731 | 514.998909  | 469.591566  | 458.6564052 | 451.3316087 | 0.106265449  | 0.317497764 | 0.2383926 |
| <b>C6UNL9</b>  | TY-2482_chromosome | + | 5115981 | 5116175 | 497.4641266 | 491.2362684 | 394.3902244 | 426.560664  | 1213.82097  | 313.0487913 | -0.549385093 | 0.889623797 | 0.7107163 |
| <b>B7LE55</b>  | TY-2482_chromosome | - | 5116824 | 5118581 | 1280.863944 | 1431.836188 | 1446.013815 | 2201.920894 | 2044.811037 | 2477.036397 | -0.685146494 | 2.523460368 | 2.1364206 |
| <b>B7LE56</b>  | TY-2482_chromosome | + | 5118767 | 5119216 | 499.3732251 | 581.2732399 | 543.3578046 | 348.4609082 | 364.1644364 | 198.2069854 | 0.730443377  | 3.43061808  | 2.9432913 |
| <b>B7LE57</b>  | TY-2482_chromosome | - | 5119298 | 5120335 | 96030.2383  | 76812.38335 | 85434.34027 | 94660.24454 | 92188.14861 | 115772.4    | -0.15148842  | 0.225694035 | 0.1667767 |
| <b>D3HOI0</b>  | TY-2482_chromosome | + | 5120490 | 5120705 | 202.0780275 | 183.1761715 | 171.4272604 | 190.2160357 | 213.8838864 | 213.0644296 | -0.131173911 | 0.331384609 | 0.249071  |
| <b>B7LE58</b>  | TY-2482_chromosome | - | 5120695 | 5121201 | 657.6788707 | 516.4609791 | 526.6344698 | 421.2514235 | 555.2494193 | 457.9714577 | 0.29203471   | 0.623012129 | 0.4862411 |
| <b>B7LE59</b>  | TY-2482_chromosome | + | 5121420 | 5122046 | 296.7851812 | 321.6120953 | 310.9548687 | 190.4582311 | 212.1288184 | 160.8831608 | 0.683999087  | 3.409401267 | 2.9246968 |
| <b>B7LE60</b>  | TY-2482_chromosome | - | 5122015 | 5124165 | 519.0966496 | 474.5514685 | 482.54701   | 348.5196691 | 397.7395718 | 367.111119  | 0.429346977  | 1.339855111 | 1.09715   |
| <b>C8U5C5</b>  | TY-2482_chromosome | - | 5124187 | 5124630 | 123.6196299 | 92.04853162 | 111.5955488 | 110.3733678 | 106.4624375 | 105.3217135 | 0.077391794  | 0.048430067 | 0.0337199 |
| <b>B7LE62</b>  | TY-2482_chromosome | + | 5124753 | 5126804 | 1452.155349 | 1578.789503 | 1597.845424 | 1013.902212 | 969.1502814 | 1115.448088 | 0.586860464  | 2.323306632 | 1.9601873 |
| <b>B7LE63</b>  | TY-2482_chromosome | - | 5126842 | 5127297 | 1520.983991 | 1627.760637 | 1634.126858 | 2420.043421 | 2649.238708 | 2100.0724   | -0.610422862 | 1.598278726 | 1.3231072 |
| <b>B7LE64</b>  | TY-2482_chromosome | - | 5127396 | 5128055 | 106.3257626 | 84.12141657 | 103.0905894 | 39.26122702 | 45.55048318 | 39.58107228 | 1.297199589  | 7.636798843 | 6.844331  |
| <b>B7LE65</b>  | TY-2482_chromosome | + | 5128228 | 5128638 | 519.115555  | 444.3328023 | 499.8382182 | 552.0478778 | 617.9405625 | 630.0704644 | -0.238862133 | 0.849107412 | 0.6760505 |
| <b>Q1RDP7</b>  | TY-2482_chromosome | + | 5128610 | 5129002 | 941.6605623 | 870.9017126 | 828.3960557 | 668.8093668 | 870.1080541 | 760.4725902 | 0.221480065  | 0.506334171 | 0.3893159 |
| <b>B7LE67</b>  | TY-2482_chromosome | - | 5129064 | 5130164 | 651.3059128 | 730.3147752 | 611.7847946 | 837.8520581 | 872.7362179 | 893.2497099 | -0.423267548 | 1.339656586 | 1.0971178 |
| <b>B7LE68</b>  | TY-2482_chromosome | + | 5130133 | 5130621 | 266.8285514 | 271.1894294 | 315.2107369 | 292.2319422 | 329.5331607 | 249.0370631 | -0.023294408 | 0.047350667 | 0.032739  |
| <b>B7LE69</b>  | TY-2482_chromosome | - | 5130624 | 5130950 | 276.6741549 | 278.2813967 | 277.2693088 | 234.239283  | 316.8922096 | 200.493979  | 0.129103601  | 0.303963858 | 0.2274767 |
| <b>B7LE70</b>  | TY-2482_chromosome | - | 5131044 | 5131700 | 2514.36886  | 2208.415098 | 2324.627428 | 2366.851941 | 3604.864017 | 3075.879051 | -0.293949186 | 0.504964833 | 0.3883202 |
| <b>serT</b>    | TY-2482_chromosome | - | 5131907 | 5131994 | 32.35827977 | 28.37697121 | 23.44403181 | 10.66238394 | 26.65309526 | 10.92807396 | 0.795796292  | 1.756499027 | 1.4611412 |

|        |                    |   |         |         |             |             |             |              |             |             |              |             |           |
|--------|--------------------|---|---------|---------|-------------|-------------|-------------|--------------|-------------|-------------|--------------|-------------|-----------|
| B7LEU9 | TY-2482_chromosome | + | 5132421 | 5133536 | 24.98985545 | 40.20829265 | 41.95743582 | 31.20025439  | 25.46010723 | 21.36236661 | 0.373182094  | 0.87730876  | 0.7002649 |
| B7LEV1 | TY-2482_chromosome | + | 5133536 | 5135326 | 35.11200373 | 33.97720927 | 37.03539116 | 51.78621762  | 29.88240297 | 40.8184389  | -0.229598364 | 0.326207278 | 0.2453862 |
| B7LEV5 | TY-2482_chromosome | + | 5137031 | 5137885 | 23.0731731  | 27.64877928 | 24.37281762 | 37.19668852  | 28.16684291 | 25.3015031  | -0.361429783 | 0.447130786 | 0.3417895 |
| B7LEV6 | TY-2482_chromosome | + | 5138022 | 5139563 | 51.46726241 | 65.29940817 | 50.62306204 | 95.24980079  | 76.32002128 | 108.83204   | -0.79654692  | 2.972048603 | 2.534378  |
| B7LEV7 | TY-2482_chromosome | + | 5139578 | 5140711 | 50.9152572  | 51.14979622 | 44.00518026 | 70.52030368  | 80.96814128 | 99.56507647 | -0.753985989 | 3.061905488 | 2.5150138 |
| B7LEV8 | TY-2482_chromosome | + | 5140899 | 5142194 | 94.29153907 | 99.4639736  | 78.21254558 | 105.1360248  | 87.26456346 | 112.9086479 | -0.206219713 | 0.38511492  | 0.2922068 |
| B7LEV9 | TY-2482_chromosome | - | 5142315 | 5144492 | 7585.452401 | 6811.189556 | 6983.216196 | 5554.737324  | 4881.455579 | 5294.034015 | 0.450401165  | 0.611678016 | 0.4773772 |
| B7LEW0 | TY-2482_chromosome | - | 5144515 | 5144958 | 1564.606057 | 1378.989737 | 1453.784133 | 1424.702543  | 1041.853945 | 1428.507145 | 0.195930464  | 0.389582133 | 0.2952537 |
| B7LEW1 | TY-2482_chromosome | - | 5144949 | 5146085 | 2974.150154 | 2787.919819 | 3095.956987 | 3410.271471  | 3350.769036 | 3741.44429  | -0.203946382 | 0.308542634 | 0.2312604 |
| B7LEW2 | TY-2482_chromosome | - | 5146134 | 5148227 | 1725.292394 | 1682.182508 | 1655.124079 | 1783.961119  | 1964.774469 | 2296.699311 | -0.214788549 | 0.520773283 | 0.4008232 |
| B7LEW3 | TY-2482_chromosome | - | 5148230 | 5148973 | 517.5840968 | 436.9393341 | 527.0306625 | 508.1590826  | 479.5186237 | 602.2061553 | -0.022718117 | 0.199563582 | 0.1472358 |
| B7LEW4 | TY-2482_chromosome | - | 5148973 | 5149614 | 817.3534794 | 786.3393602 | 863.0434307 | 820.1245521  | 843.605996  | 881.3825526 | -0.011585868 | 0.087246552 | 0.0636258 |
| B7LF95 | TY-2482_chromosome | - | 5149724 | 5150026 | 10990.95415 | 10723.66546 | 11467.04026 | 11702.04227  | 12661.56837 | 12294.43019 | -0.119504727 | 0.145229136 | 0.1060196 |
| B7LF96 | TY-2482_chromosome | - | 5150471 | 5150680 | 61.26523843 | 79.72116772 | 49.68130088 | 8.821448211  | 9.183544742 | 0.322508835 | 3.093941702  | 20.05541907 | 18.768985 |
| B7LF99 | TY-2482_chromosome | + | 5150966 | 5151175 | 3059.359935 | 3573.222672 | 2667.579644 | 391.3599531  | 773.9383714 | 387.4536381 | 2.512591022  | 22.23518943 | 20.900126 |
| D6I8Q5 | TY-2482_chromosome | + | 5151117 | 5151374 | 2192.687828 | 2516.949065 | 1764.921709 | 350.5942434  | 723.9060039 | 353.2606006 | 2.104240179  | 15.661375   | 14.496184 |
| C8TPT1 | TY-2482_chromosome | + | 5151352 | 5151579 | 326.8216519 | 366.6225441 | 272.2298443 | 180.12807533 | 170.6078613 | 69.20132613 | 1.516862294  | 8.3922584   | 7.543817  |
| B7LFA1 | TY-2482_chromosome | - | 5151797 | 5152867 | 92.15333665 | 89.5335261  | 70.22908793 | 47.42963794  | 30.88442959 | 22.93412476 | 1.179146263  | 6.339205089 | 5.6243421 |
| B7LFA2 | TY-2482_chromosome | - | 5152942 | 5155683 | 167.6252262 | 164.4542817 | 140.9855957 | 86.22311631  | 52.67008337 | 51.72616592 | 1.205796218  | 8.264912408 | 7.4218081 |
| B7LFA3 | TY-2482_chromosome | + | 5155766 | 5156791 | 126.9369728 | 155.8597015 | 137.2579708 | 57.8244434   | 58.25611777 | 52.78103519 | 1.253721159  | 9.743961187 | 8.8296903 |
| B7LFA4 | TY-2482_chromosome | - | 5156770 | 5157459 | 153.9756453 | 157.3567454 | 164.4702223 | 158.4035261  | 136.4392136 | 153.883035  | 0.084221603  | 0.1718416   | 0.1269588 |
| B7LFA5 | TY-2482_chromosome | + | 5157589 | 5158758 | 29.47458622 | 53.92907968 | 42.29405348 | 43.28386517  | 28.12475783 | 27.93283602 | 0.168288732  | 0.542936782 | 0.4190119 |
| B7LFA6 | TY-2482_chromosome | + | 5158761 | 5161304 | 131.7249180 | 121.4193215 | 118.033003  | 109.423736   | 67.15804906 | 104.9983547 | 0.390570743  | 1.173838063 | 0.9538251 |
| B7LFA7 | TY-2482_chromosome | + | 5161304 | 5161900 | 115.1353034 | 120.7143611 | 112.1297615 | 54.16979461  | 65.54656718 | 68.24137725 | 0.902681082  | 4.817921716 | 4.2085689 |
| B7LFA8 | TY-2482_chromosome | - | 5161999 | 5162301 | 406.1123392 | 361.835659  | 417.3992614 | 132.1735522  | 105.4626977 | 131.4228475 | 1.718048899  | 15.01854581 | 13.882947 |
| B7LFA9 | TY-2482_chromosome | - | 5162304 | 5163221 | 1311.709184 | 1234.615322 | 1350.929342 | 423.0379557  | 349.3524203 | 440.5176201 | 1.712020505  | 16.62318768 | 15.42624  |
| B7LFB0 | TY-2482_chromosome | + | 5163554 | 5164738 | 47.91580378 | 54.94738277 | 36.51589451 | 22.94568316  | 32.95750087 | 12.4838313  | 0.887425163  | 3.091084085 | 2.6404485 |
| B7LFB1 | TY-2482_chromosome | + | 5165030 | 5166268 | 1593.481697 | 1705.325274 | 1818.454855 | 8421.044661  | 6116.336616 | 6979.436873 | -2.101581144 | 7.120738891 | 6.3590203 |
| B7LFB2 | TY-2482_chromosome | - | 5166312 | 5166536 | 652.804759  | 649.5354973 | 690.6925431 | 840.9961556  | 950.1143046 | 960.2967988 | -0.431050508 | 1.810473401 | 1.5058123 |
| B7LFB3 | TY-2482_chromosome | - | 5166560 | 5167150 | 1696.682664 | 1757.281381 | 1996.156611 | 2259.503475  | 2405.235207 | 2776.955786 | -0.394312426 | 0.87189081  | 0.6952759 |
| B7MPT9 | TY-2482_chromosome | - | 5167135 | 5168466 | 832.2348112 | 855.4983219 | 916.5415483 | 945.0937714  | 905.4849082 | 897.3307514 | -0.075638112 | 0.163786404 | 0.1202857 |
| C8TPU6 | TY-2482_chromosome | - | 5168498 | 5168779 | 96.39207177 | 100.4833407 | 101.705638  | 34.83863483  | 38.28437522 | 27.95158944 | 1.532579507  | 10.89461574 | 9.9254662 |
| C8TPU7 | TY-2482_chromosome | - | 5168828 | 5169076 | 186.3182957 | 163.2362723 | 175.5982514 | 76.51802799  | 71.93678761 | 50.51412664 | 1.371490025  | 10.28409899 | 9.3440846 |
| C8TPU8 | TY-2482_chromosome | - | 5169067 | 5169444 | 239.1948565 | 272.0752117 | 241.5182504 | 106.5706755  | 95.52677794 | 93.55392696 | 1.289553435  | 10.44284823 | 9.4919235 |
| C8TPU9 | TY-2482_chromosome | - | 5169444 | 5169794 | 166.6748272 | 177.5439345 | 174.9661282 | 80.39263946  | 59.15838332 | 32.42302515 | 1.467888536  | 10.4435982  | 9.4919235 |
| C8U7P4 | TY-2482_chromosome | - | 5169833 | 5170042 | 95.82874759 | 64.78830405 | 105.3980613 | 46.91960396  | 37.25538266 | 38.30073771 | 1.201463732  | 5.383451984 | 4.7318541 |
| C6UPU4 | TY-2482_chromosome | - | 5170005 | 5170628 | 185.3942964 | 202.7930848 | 182.7533379 | 93.44402805  | 71.78076423 | 93.24644601 | 1.109623539  | 7.888436063 | 7.0766631 |
| C8U7P2 | TY-2482_chromosome | - | 5170628 | 5171056 | 145.8288547 | 158.6448697 | 129.7742318 | 59.91732339  | 41.71237293 | 65.43340486 | 1.340182775  | 9.856271638 | 8.9332908 |
| C8U7P1 | TY-2482_chromosome | - | 5171115 | 5171750 | 234.9749373 | 201.8869519 | 212.5135159 | 106.7828925  | 124.7126317 | 120.9904707 | 0.926345374  | 5.008359813 | 4.3844439 |
| E1J6T9 | TY-2482_chromosome | + | 5171752 | 5172138 | 511.0547979 | 505.8710034 | 331.3582501 | 80.54176186  | 216.2363635 | 74.57025858 | 1.790774061  | 8.809345579 | 7.9416906 |
| C8TPV1 | TY-2482_chromosome | - | 5172109 | 5173002 | 261.8079292 | 237.787634  | 254.1920417 | 81.03424876  | 64.5359794  | 72.39585168 | 1.792409765  | 17.13122241 | 15.920583 |
| B7MXC9 | TY-2482_chromosome | - | 5173008 | 5173238 | 105.5590576 | 107.3300407 | 84.11687054 | 38.84707887  | 14.34311985 | 30.15296836 | 1.739919737  | 10.81060443 | 9.8453374 |
| C8TPV5 | TY-2482_chromosome | - | 5173201 | 5173605 | 127.9571429 | 133.0145198 | 105.9346173 | 53.72544288  | 31.70370987 | 43.42710051 | 1.425962726  | 10.6266591  | 9.1508615 |
| C8TPV6 | TY-2482_chromosome | - | 5173605 | 5174135 | 168.9552946 | 182.2893133 | 165.590416  | 58.37175297  | 40.88022314 | 38.4951358  | 1.818273972  | 17.44497529 | 16.228109 |
| C8U7N0 | TY-2482_chromosome | - | 5174433 | 5174873 | 248.9109515 | 277.5386138 | 258.7552809 | 121.6024411  | 99.22725953 | 58.70128257 | 1.366618995  | 9.944378888 | 9.0150075 |
| C8U7M9 | TY-2482_chromosome | - | 5174953 | 5175771 | 921.9687685 | 960.9658935 | 1011.594018 | 394.5487158  | 272.9847552 | 175.8967751 | 1.665878092  | 12.17349056 | 11.140485 |
| C8U7M8 | TY-2482_chromosome | - | 5175838 | 5176182 | 328.2565166 | 337.3599315 | 330.7384342 | 106.5783739  | 100.9586333 | 60.17384917 | 1.471242592  | 9.278367463 | 8.3883992 |
| C8U7M7 | TY-2482_chromosome | - | 5176260 | 5176844 | 245.7487439 | 322.874303  | 283.2118885 | 111.4100998  | 69.99874946 | 52.02876889 | 1.69897826   | 13.84053544 | 12.742291 |
| C8U7M6 | TY-2482_chromosome | - | 5176847 | 5177533 | 147.0093416 | 189.5712817 | 183.6866457 | 62.63831193  | 53.65980406 | 51.50144127 | 1.568660746  | 13.62680692 | 12.535663 |
| C8U7M5 | TY-2482_chromosome | - | 5177533 | 5178480 | 193.3917096 | 265.6763075 | 217.0977998 | 81.64995247  | 66.35866756 | 74.99900267 | 1.506724048  | 13.10839751 | 12.029977 |
| C8U7M4 | TY-2482_chromosome | - | 5178500 | 5178778 | 92.07984861 | 103.5795862 | 66.76540267 | 27.86555047  | 16.23763557 | 27.41872991 | 1.773938054  | 11.27077637 | 10.281586 |
| C8U7M3 | TY-2482_chromosome | - | 5178802 | 5179080 | 77.01953529 | 88.59056474 | 65.65734108 | 27.06007193  | 18.99899719 | 28.72320847 | 1.561323845  | 9.320033582 | 8.4256109 |
| C8U7M2 | TY-2482_chromosome | - | 5179095 | 5179304 | 46.19175568 | 49.37448182 | 57.02530187 | 22.4441243   | 16.28563959 | 23.51007083 | 1.313000313  | 5.826674875 | 5.1445955 |
| B6ZXE1 | TY-2482_chromosome | - | 5180308 | 5181078 | 249.2532852 | 265.5902969 | 157.6619659 | 54.05541724  | 88.48923263 | 55.61160232 | 1.669179128  | 11.99229722 | 10.969439 |
| Q32F72 | TY-2482_chromosome | - | 5181710 | 5182660 | 2826.116377 | 2625.539126 | 2822.544617 | 0            | 0           | 2.36E-09    | 15.17859296  | 171.1069332 | 167.44759 |
| Q32F73 | TY-2482_chromosome | - | 5182660 | 5184126 | 5519.840106 | 5296.193541 | 5291.711301 | 0            | 0           | 2.36E-09    | 16.12231509  | 80.69588197 | 78.15048  |
| Q32F74 | TY-2482_chromosome | - | 5184224 | 5184934 | 3635.309581 | 3551.976085 | 3312.212964 | 866.9382163  | 1194.060701 | 1189.072842 | 1.731871637  | 5.779873555 | 5.1018934 |

|               |                    |   |         |         |             |             |             |              |              |             |              |             |            |
|---------------|--------------------|---|---------|---------|-------------|-------------|-------------|--------------|--------------|-------------|--------------|-------------|------------|
| <b>E7DYT8</b> | TY-2482_chromosome | + | 5185030 | 5185230 | 130.0459767 | 129.3285065 | 142.0846513 | 18.23597853  | 19.08976586  | 22.21391702 | 2.79063609   | 29.44786006 | 27.961701  |
| <b>C8U7L4</b> | TY-2482_chromosome | + | 5185264 | 5185554 | 225.6835259 | 256.9729891 | 246.2806396 | 28.2456054   | 27.28602993  | 27.66032648 | 3.101725461  | 42.78988538 | 41.028167  |
| <b>C8U7L3</b> | TY-2482_chromosome | + | 5185765 | 5186139 | 136.7561022 | 151.3604353 | 139.8952166 | 26.79601078  | 23.57460018  | 35.13670597 | 2.330543323  | 23.34077285 | 21.971462  |
| <b>C8U7L2</b> | TY-2482_chromosome | + | 5186136 | 5187653 | 382.1658816 | 351.2500967 | 390.2883767 | 95.65654704  | 82.67612254  | 133.5178293 | 1.929573089  | 16.27735234 | 15.093678  |
| <b>C8U7L1</b> | TY-2482_chromosome | + | 5188646 | 5188614 | 120.8913686 | 146.244502  | 147.3888684 | 52.95012924  | 32.61250383  | 47.26035194 | 1.600071964  | 12.65862529 | 11.604585  |
| <b>C8U7L0</b> | TY-2482_chromosome | + | 5188617 | 5189063 | 51.58597036 | 49.43933609 | 52.85500223 | 28.49800714  | 18.07619444  | 27.47624829 | 1.059440665  | 4.254926453 | 3.6962959  |
| <b>C8U7K9</b> | TY-2482_chromosome | + | 5189074 | 5189634 | 62.99764644 | 56.7637608  | 49.88536615 | 31.50999152  | 17.17336323  | 19.96322772 | 1.227061199  | 5.783550647 | 5.1051169  |
| <b>B3BQ93</b> | TY-2482_chromosome | + | 5190956 | 5191995 | 107.3791641 | 140.5204457 | 133.4822397 | 24.68077592  | 31.90519783  | 28.94111957 | 2.136330343  | 18.87595076 | 17.619726  |
| <b>C6UP08</b> | TY-2482_chromosome | + | 5192010 | 5192276 | 123.933163  | 153.2886251 | 135.9558934 | 33.16076903  | 50.21069835  | 33.18116872 | 1.78119208   | 14.92182462 | 13.788818  |
| <b>B7MRX3</b> | TY-2482_chromosome | + | 5192732 | 5194699 | 192.0224743 | 235.4220975 | 197.2457757 | 70.00545053  | 83.77002334  | 78.92266571 | 1.383884814  | 11.281393   | 10.290433  |
| <b>C6V1Q5</b> | TY-2482_chromosome | + | 5194885 | 5195301 | 58.029543   | 78.59121448 | 72.71739451 | 24.93493189  | 24.55869711  | 25.01305831 | 1.441421668  | 7.9856579   | 7.1657903  |
| <b>B6ZXG1</b> | TY-2482_chromosome | + | 5195382 | 5196132 | 54.28237544 | 80.1962488  | 63.96411235 | 20.93220081  | 17.19740327  | 27.25829962 | 1.546645463  | 8.136546896 | 7.3026274  |
| <b>D8ACV6</b> | TY-2482_chromosome | + | 5197139 | 5197753 | 64.12226087 | 87.77587883 | 63.77173406 | 7.878200732  | 7.259768691  | 7.899597269 | 3.116983307  | 22.91450122 | 21.560507  |
| <b>C8U7J7</b> | TY-2482_chromosome | + | 5197770 | 5198318 | 77.80228348 | 86.24569589 | 64.9948968  | 43.30777684  | 51.97889275  | 34.60796268 | 0.730313115  | 3.121134164 | 2.6659085  |
| <b>C8UMI7</b> | TY-2482_chromosome | + | 5198340 | 5198555 | 134.9218283 | 144.0398919 | 71.01339193 | 43.08059064  | 131.628132   | 39.06236181 | 0.588943411  | 1.4435879   | 1.1866756  |
| <b>C8UMI8</b> | TY-2482_chromosome | + | 5198614 | 5199417 | 24.2301198  | 40.09077714 | 41.29453047 | 39.88869048  | 30.91782524  | 24.11059978 | 0.048671989  | 0.189864354 | 0.1401131  |
| <b>C8UMI9</b> | TY-2482_chromosome | + | 5199401 | 5201104 | 101.4866527 | 125.1575631 | 114.8866452 | 128.6736125  | 121.89929259 | 138.0057662 | -0.21517518  | 0.449532942 | 0.3434634  |
| <b>B5YYP6</b> | TY-2482_chromosome | + | 5201107 | 5203248 | 265.4496887 | 265.5145143 | 270.0396057 | 236.6317252  | 201.9703985  | 215.8152683 | 0.278489834  | 0.849189403 | 0.6760505  |
| <b>C8UMJ1</b> | TY-2482_chromosome | + | 5203409 | 5204413 | 212.3311895 | 196.9662179 | 237.273429  | 184.8813397  | 117.1998339  | 187.778956  | 0.440257258  | 1.166731832 | 0.9481711  |
| <b>C8U7J2</b> | TY-2482_chromosome | + | 5204440 | 5205651 | 286.4291468 | 271.1092899 | 289.8869786 | 297.8452675  | 239.2694865  | 252.7282999 | 0.091572246  | 0.214020416 | 0.1584685  |
| <b>C8UMJ3</b> | TY-2482_chromosome | + | 5205710 | 5206096 | 76.56428891 | 62.42585099 | 57.11484941 | 56.4499392   | 49.05824958  | 64.20277043 | 0.233895665  | 0.434234814 | 0.3312553  |
| <b>C8UMJ4</b> | TY-2482_chromosome | + | 5206149 | 5206607 | 32.61078493 | 36.84204533 | 49.35184841 | 42.57763264  | 33.53408     | 57.3173917  | -0.083559819 | 0.242155826 | 0.1796661  |
| <b>B5YYN8</b> | TY-2482_chromosome | + | 5206594 | 5207154 | 50.19817285 | 42.24930968 | 47.53642424 | 34.77719283  | 31.79971178  | 38.01290894 | 0.466610026  | 1.056338949 | 0.8512282  |
| <b>C8U7I8</b> | TY-2482_chromosome | + | 5207157 | 5207804 | 77.76076905 | 75.15334651 | 79.25648082 | 32.28435265  | 36.30832476  | 62.27269283 | 0.93491669   | 0.215803136 | 0.2542046  |
| <b>C8U7I7</b> | TY-2482_chromosome | + | 5207804 | 5209993 | 131.9932957 | 193.4564364 | 161.7327879 | 44.55014191  | 28.91679913  | 66.22358371 | 1.781588337  | 12.20152573 | 11.165429  |
| <b>C6UNY7</b> | TY-2482_chromosome | + | 5210763 | 5212451 | 158.6128081 | 161.6241706 | 135.7031471 | 114.8806867  | 100.0078122  | 132.5500035 | 0.378935764  | 1.255000138 | 1.0216775  |
| <b>C8UMK2</b> | TY-2482_chromosome | + | 5212451 | 5213716 | 73.9337484  | 70.59657331 | 86.76452364 | 60.2796093   | 40.74128554  | 89.85728576 | 0.380429728  | 0.562910024 | 0.435809   |
| <b>C6UNY5</b> | TY-2482_chromosome | + | 5214018 | 5214632 | 52.23444627 | 63.14513641 | 51.99421293 | 31.86696478  | 27.30480365  | 20.136829   | 0.963576192  | 0.214020416 | 0.37208882 |
| <b>C8UMK5</b> | TY-2482_chromosome | + | 5214726 | 5215457 | 102.9635542 | 125.4485693 | 121.5733989 | 57.67922299  | 71.09472058  | 50.34191696 | 0.923716559  | 5.151494126 | 4.517515   |
| <b>C6UNY3</b> | TY-2482_chromosome | + | 5215890 | 5216288 | 258.5210502 | 196.4724043 | 163.1577366 | 63.87698899  | 225.4419448  | 70.64465247 | 0.806942135  | 1.739976135 | 1.4476135  |
| <b>C8UML0</b> | TY-2482_chromosome | + | 5217762 | 5219024 | 97.02292266 | 126.7895605 | 99.48822019 | 67.78714906  | 66.36146972  | 67.31865547 | 0.426416261  | 1.885974189 | 1.5725901  |
| <b>C8UML1</b> | TY-2482_chromosome | + | 5219097 | 5227475 | 689.3458057 | 820.3056653 | 706.2987961 | 772.7868482  | 678.7662893  | 994.0188743 | -0.151441946 | 0.312181145 | 0.2341023  |
| <b>C8TNB3</b> | TY-2482_chromosome | + | 5227816 | 5228184 | 128.6659313 | 109.6929918 | 134.8718524 | 68.49291717  | 89.22352481  | 93.16748045 | 0.670547506  | 2.295821041 | 1.935305   |
| <b>B7LFB4</b> | TY-2482_chromosome | - | 5228391 | 5228618 | 29.42005525 | 48.03770662 | 52.62760155 | 48.18815884  | 77.56288034  | 47.74027777 | -0.436418216 | 0.865717977 | 0.6899596  |
| <b>B7LFB6</b> | TY-2482_chromosome | - | 5228813 | 5230138 | 34.20077797 | 42.95990927 | 39.64215462 | 60.1506719   | 44.51306719  | 47.52062049 | -0.454421809 | 0.696530789 | 0.7240168  |
| <b>B7LFC3</b> | TY-2482_chromosome | + | 5234541 | 5235176 | 283.9925463 | 314.1586922 | 328.2891275 | 275.0318376  | 307.6468767  | 275.0875833 | 0.110153612  | 0.228989876 | 0.1696364  |
| <b>B7LFC4</b> | TY-2482_chromosome | - | 5235222 | 5239181 | 3596.34471  | 3395.763742 | 3755.5311   | 801.4978372  | 589.5685159  | 779.9743188 | 2.324903414  | 12.32503014 | 11.281635  |
| <b>B7LFC5</b> | TY-2482_chromosome | + | 5239604 | 5241109 | 690.3009518 | 669.8412732 | 648.8930867 | 156.0083489  | 140.9227512  | 222.9312924 | 2.005055336  | 17.1017194  | 15.892623  |
| <b>B7LFC6</b> | TY-2482_chromosome | + | 5241645 | 5242481 | 77.8124529  | 81.68533554 | 67.73169396 | 18.71689693  | 22.74411243  | 27.34088038 | 1.730340846  | 10.75930202 | 9.7963128  |
| <b>B7LFC7</b> | TY-2482_chromosome | + | 5242542 | 5243666 | 405.3782738 | 411.6224547 | 360.8946694 | 80.5557982   | 50.80508987  | 72.24721113 | 2.482794142  | 28.28865426 | 26.823085  |
| <b>B7LFC8</b> | TY-2482_chromosome | + | 5243675 | 5244943 | 562.2504453 | 673.1179461 | 539.7971774 | 98.94616603  | 75.46274617  | 76.52556454 | 2.71497587   | 34.15653787 | 32.565378  |
| <b>E6ANA4</b> | TY-2482_chromosome | - | 5244867 | 5245210 | 178.0315743 | 182.3135302 | 157.5383149 | 23.67612787  | 29.24380993  | 14.97795661 | 2.85195982   | 34.27423267 | 32.677545  |
| <b>B7LFD0</b> | TY-2482_chromosome | + | 5245430 | 5246350 | 131.5184126 | 134.3206154 | 145.3844548 | 85.15911345  | 70.96941689  | 58.30796353 | 0.896852232  | 5.175338163 | 4.5400675  |
| <b>B7LFD1</b> | TY-2482_chromosome | - | 5246406 | 5246816 | 22.47263552 | 26.79379527 | 16.78214095 | 40.05085813  | 41.88521374  | 36.99014671 | -0.946474007 | 2.683171706 | 2.2810344  |
| <b>B7LFD2</b> | TY-2482_chromosome | - | 5246821 | 5248143 | 25.40966111 | 21.72887181 | 27.8877627  | 92.80636794  | 76.37197039  | 85.52668696 | -1.722945458 | 12.04708865 | 11.021211  |
| <b>B7LFD3</b> | TY-2482_chromosome | - | 5248139 | 5250154 | 32.09396912 | 33.51971175 | 33.68247662 | 133.3224368  | 131.0370647  | 130.295955  | -1.995243577 | 18.38388586 | 17.139514  |
| <b>B7LFD4</b> | TY-2482_chromosome | - | 5250166 | 5252586 | 79.1916984  | 82.47923615 | 83.88500941 | 180.4935021  | 116.3293159  | 151.2929422 | -0.901832828 | 4.316619853 | 3.7517453  |
| <b>B5YU69</b> | TY-2482_chromosome | + | 5253101 | 5254528 | 72.34859155 | 91.32891047 | 77.81376135 | 68.0184968   | 54.55753398  | 51.56928559 | 0.374635208  | 1.386762672 | 1.1373502  |
| <b>B7LA99</b> | TY-2482_chromosome | - | 5254575 | 5255438 | 64.89573977 | 81.03463939 | 67.87921972 | 99.11626688  | 73.65942204  | 64.8875944  | -0.272873031 | 0.322857431 | 0.242838   |
| <b>B7LFE0</b> | TY-2482_chromosome | + | 5255438 | 5255743 | 24.37750975 | 7.872422275 | 17.10220725 | 38.97608352  | 31.80110463  | 33.00380544 | -0.923428685 | 3.132949702 | 2.676909   |
| <b>C8UMN7</b> | TY-2482_chromosome | + | 5257678 | 5258892 | 190.6160461 | 215.321326  | 185.3417149 | 55.29189565  | 61.80109884  | 95.25694171 | 1.516605663  | 10.69484961 | 9.7327333  |
| <b>B7UP05</b> | TY-2482_chromosome | - | 5259068 | 5260594 | 240.7910362 | 247.03824   | 232.2868901 | 389.3926178  | 294.9123964  | 128.8272455 | -0.33246444  | 0.278370737 | 0.2080806  |
| <b>E6B380</b> | TY-2482_chromosome | - | 5260569 | 5260865 | 23.04698187 | 21.71571448 | 30.03431237 | 46.19104409  | 53.85797598  | 23.14181389 | -0.734112182 | 1.666228824 | 1.3813084  |
| <b>B1LKM5</b> | TY-2482_chromosome | + | 5260954 | 5262786 | 752.8563362 | 920.7765341 | 816.6370514 | 1208.9683368 | 1135.087217  | 226.5576541 | -0.262180061 | 0.04717375  | 0.0326604  |
| <b>C8UMP3</b> | TY-2482_chromosome | + | 5264843 | 5267200 | 515.8109525 | 586.8563956 | 587.0445074 | 488.7193694  | 425.8325845  | 482.7599033 | 0.256267521  | 0.756077641 | 0.5987492  |
| <b>B7MQ88</b> | TY-2482_chromosome | - | 5267224 | 5267460 | 127.1096733 | 145.2805379 | 111.2272688 | 62.71854773  | 83.82769094  | 68.53305052 | 0.783543086  | 4.180423608 | 3.6252235  |
| <b>D3GX28</b> | TY-2482_chromosome | - | 5267479 | 5268912 | 322.9389321 | 357.5182159 | 341.3213716 | 173.6527982  | 202.0332399  | 223.3735387 | 0.789197209  | 3.845373038 | 3.3163612  |



|               |                    |   |         |         |             |             |             |             |             |             |              |             |           |
|---------------|--------------------|---|---------|---------|-------------|-------------|-------------|-------------|-------------|-------------|--------------|-------------|-----------|
| <b>E5ZNV7</b> | TY-2482_chromosome | - | 5268912 | 5269130 | 49.72324698 | 82.0550057  | 61.29736835 | 18.88821222 | 22.79267192 | 19.80850168 | 1.54215129   | 8.219620833 | 7.3791606 |
| <b>C8UMT3</b> | TY-2482_chromosome | - | 5270141 | 5270362 | 75.54767111 | 83.75006065 | 64.36364599 | 35.90710367 | 59.44350231 | 21.81832924 | 0.831052695  | 3.017201882 | 2.5751274 |
| <b>B7LBX4</b> | TY-2482_chromosome | - | 5270599 | 5272686 | 199.8186424 | 190.3771008 | 164.7397679 | 47.58645273 | 66.54811062 | 52.75523636 | 1.728193546  | 14.8766493  | 13.744934 |
| <b>B7N312</b> | TY-2482_chromosome | + | 5276307 | 5277093 | 135.9581459 | 175.3595641 | 127.7390527 | 61.87950392 | 71.12331992 | 38.80922036 | 1.20729133   | 8.288209531 | 7.4444416 |
| <b>C8UMU1</b> | TY-2482_chromosome | + | 5277222 | 5277413 | 46.99402143 | 57.88355837 | 46.70170557 | 21.65986858 | 28.35021702 | 13.66957698 | 1.1441643    | 4.95271909  | 4.3335801 |
| <b>Q8VR34</b> | TY-2482_chromosome | - | 5277374 | 5277833 | 52.91461349 | 72.42306462 | 52.55889018 | 34.29353558 | 43.88339225 | 15.27164736 | 0.757801947  | 2.762281363 | 2.3499264 |
| <b>Q712Q2</b> | TY-2482_chromosome | + | 5278409 | 5278900 | 105.750719  | 74.13443217 | 89.06847401 | 369.7434436 | 300.3116701 | 226.9107024 | -1.744820368 | 12.82961217 | 11.767714 |
