# Supplementary material
Source: PubMed Central journal article supplement (PMC3879109)
Supplement: NIHMS504424-supplement-Supplementary_Table_5.pdf [file NIHMS504424-supplement-Supplementary_Table_5.pdf]

**Supplementary Table 5.** Pathway enrichments for signature genes for different comparisons between strains that contain the RM.EcoGIII system and strains that do not contain this system.

| <b>Up Regulated Pathways</b>                                                                     | <b>C227-11 vs. C227<math>\Delta</math>RM<br/>Pathway Fold Enrichment<br/>(p value<sup>†</sup>)</b> | <b>C227-11 vs. 55989<br/>Pathway Fold Enrichment<br/>(p value<sup>†</sup>)</b> | <b>K12 vs. K12+ <math>\phi</math>Stx104<br/>Pathway Fold Enrichment<br/>(p value<sup>†</sup>)</b> |
|--------------------------------------------------------------------------------------------------|----------------------------------------------------------------------------------------------------|--------------------------------------------------------------------------------|---------------------------------------------------------------------------------------------------|
| <b>Cation transport</b>                                                                          | 2.4 (8.4x10e-10)                                                                                   | 2.0 (1.2x10e-7)                                                                | 8.5 (9.1x10e-16)                                                                                  |
| <b>Iron ion transport</b>                                                                        | 4.5 (4.0x10e-16)                                                                                   | 3.8 (3.1x10e-16)                                                               | 116.9 (1.0x10e-40)                                                                                |
| <b>di-, tri-valent inorganic cation transport</b>                                                | 4.2 (3.0x10e-15)                                                                                   | 3.5 (5.1x10e-15)                                                               | 90.0 (4.5x10e-38)                                                                                 |
| <b>Down Regulated Pathways</b>                                                                   |                                                                                                    |                                                                                |                                                                                                   |
| <b>Flagellum</b>                                                                                 | 3.6 (3.4x10e-14)                                                                                   | 3.0 (1.2x10e-19)                                                               | --                                                                                                |
| <b>Cell projection</b>                                                                           | 4.6 (4.6x10e-11)                                                                                   | 3.2 (1.2x10e-9)                                                                | --                                                                                                |
| <b>Flagellar motility</b>                                                                        | 4.0 (7.4x10e-9)                                                                                    | 3.5 (3.2x10e-12)                                                               | --                                                                                                |
| <b>Organelle inner membrane</b>                                                                  | --                                                                                                 | --                                                                             | 54.4 (2.0x10e-89)                                                                                 |
| <b>Taxis</b>                                                                                     | 3.5 (7.8x10e-14)                                                                                   | 3.2 (5.1x10e-20)                                                               | 12.3 (7.8x10e-15)                                                                                 |
| <b>Pathways Enriched for Genes in C227 Harboring CTGCAG Modifications</b>                        |                                                                                                    |                                                                                |                                                                                                   |
| <b>Flagellum</b>                                                                                 | 1.9 (4.1x10e-5)                                                                                    |                                                                                |                                                                                                   |
| <b>Pathways Enriched for Genes in K12+<math>\phi</math>Stx104 Harboring CTGCAG Modifications</b> |                                                                                                    |                                                                                |                                                                                                   |
| <b>Organelle inner membrane</b>                                                                  | 33.7 (1.2x10e-187)                                                                                 |                                                                                |                                                                                                   |
| <b>Taxis</b>                                                                                     | 4.9 (2.6x10e-11)                                                                                   |                                                                                |                                                                                                   |

<sup>†</sup>Nominal p-values represent the significance of the Fisher Exact Test statistic under the null hypothesis that the frequency of the indicated signature gene set is the same between a reference set of genes consisting of the intersection of the genes in each strain for the indicated comparison and the set of genes comprising the signature.

-- Indicates the p value was not < 5% FDR
