# Supplementary material
Source: PubMed Central journal article supplement (PMC3879109)
Supplement: NIHMS504424-supplement-Supplementary_Table_7.pdf [file NIHMS504424-supplement-Supplementary_Table_7.pdf]

Supplementary Table 7. K12/K37 versus K12+Stx104 phage gene expression signature.

| gene name | reference name              | strand | start position | end position | K12+ $\phi$ Stx104_sample1 | K12+ $\phi$ Stx104_sample2 | K12_sample1 | K12_sample2 | K12_sample3 | log2 fold change | log10 p value | log10 FDR |
|-----------|-----------------------------|--------|----------------|--------------|----------------------------|----------------------------|-------------|-------------|-------------|------------------|---------------|-----------|
| thrL      | gi 49175990 ref NC_000913.2 | +      | 190            | 255          | 676.3046716                | 328.3370127                | 524.5676513 | 865.2570619 | 924.9799468 | -0.549652184     | 1.533177025   | 0.851146  |
| thrA      | gi 49175990 ref NC_000913.2 | +      | 337            | 2799         | 846.543033                 | 754.0927012                | 496.5075528 | 391.4465379 | 380.4902868 | 0.949910543      | 4.43682333    | 3.2402087 |
| thrB      | gi 49175990 ref NC_000913.2 | +      | 2801           | 3733         | 538.3025029                | 524.279773                 | 538.0862674 | 502.2260752 | 428.7790067 | 0.12884348       | 0.234002201   | 0.0828767 |
| thrC      | gi 49175990 ref NC_000913.2 | +      | 3734           | 5020         | 1108.572068                | 1130.280982                | 872.3548293 | 804.943982  | 687.9142554 | 0.511127278      | 1.685288518   | 0.9685809 |
| yaaX      | gi 49175990 ref NC_000913.2 | +      | 5234           | 5530         | 128.0800003                | 127.2680478                | 105.4737006 | 133.2647852 | 127.8069871 | 0.055136598      | 0.103772918   | 0.0277229 |
| yaaA      | gi 49175990 ref NC_000913.2 | -      | 5683           | 6459         | 476.8506766                | 476.8506766                | 350.7797937 | 381.2180882 | 421.5724275 | 0.213082298      | 0.555494352   | 0.2405783 |
| yaaJ      | gi 49175990 ref NC_000913.2 | -      | 6529           | 7959         | 586.4132846                | 658.2693282                | 1165.951389 | 1199.466107 | 988.5177834 | -0.858060958     | 3.697590683   | 2.6035501 |
| talB      | gi 49175990 ref NC_000913.2 | +      | 8238           | 9191         | 6226.898625                | 7027.712302                | 7153.710324 | 7164.115245 | 7110.692967 | -0.12558326      | 0.188978076   | 0.0611353 |
| mog       | gi 49175990 ref NC_000913.2 | +      | 9306           | 9893         | 680.3518679                | 648.6951509                | 801.1361121 | 713.2258192 | 800.8424301 | -0.206031233     | 0.502127707   | 0.2138914 |
| yaaH      | gi 49175990 ref NC_000913.2 | -      | 9928           | 10494        | 293.7131264                | 264.9489232                | 265.4971173 | 260.2018978 | 289.2821074 | 0.052664426      | 0.068250211   | 0.0162038 |
| yaaW      | gi 49175990 ref NC_000913.2 | -      | 10643          | 11356        | 43.67919372                | 39.8637293                 | 25.4265901  | 23.68494086 | 33.44933737 | 0.60737436       | 1.398147285   | 0.7599725 |
| yaal      | gi 49175990 ref NC_000913.2 | -      | 11382          | 11786        | 17.13421521                | 15.17411374                | 13.7594829  | 16.88911574 | 24.43575826 | -0.18332757      | 0.166192619   | 0.0525902 |
| dnaK      | gi 49175990 ref NC_000913.2 | +      | 12163          | 14079        | 7284.07217                 | 7666.901226                | 2903.708355 | 2244.911724 | 2908.469726 | 1.47576596       | 9.999055198   | 8.1953208 |
| dnaJ      | gi 49175990 ref NC_000913.2 | +      | 14168          | 15298        | 1073.739519                | 947.8496382                | 717.680468  | 534.9730114 | 495.0187157 | 0.830327147      | 3.518424889   | 2.4513359 |
| insL      | gi 49175990 ref NC_000913.2 | +      | 15445          | 16557        | 853.7488698                | 845.3235793                | 744.1914308 | 608.030204  | 834.2471836 | 0.224194734      | 0.514209594   | 0.2208945 |
| hokC      | gi 49175990 ref NC_000913.2 | -      | 16751          | 16903        | 84.33512167                | 70.22159563                | 109.1080287 | 102.2428242 | 137.6520652 | -0.571409092     | 1.782372687   | 1.0409668 |
| mokC      | gi 49175990 ref NC_000913.2 | -      | 16751          | 16960        | 90.9059627                 | 88.31807089                | 141.1154437 | 144.7655189 | 180.3007848 | -0.795979125     | 3.066361423   | 2.0196963 |
| nhaA      | gi 49175990 ref NC_000913.2 | +      | 17489          | 18655        | 1168.355374                | 1041.885523                | 1168.277806 | 1098.66297  | 933.5722005 | 0.074492225      | 0.090531844   | 0.023835  |
| nhaR      | gi 49175990 ref NC_000913.2 | +      | 18715          | 19620        | 361.4534623                | 370.4333227                | 297.692747  | 340.7408035 | 338.6896891 | 0.158356706      | 0.356632983   | 0.1412357 |
| insB      | gi 49175990 ref NC_000913.2 | -      | 19811          | 20314        | 192.49467                  | 188.0488411                | 155.545735  | 182.5528535 | 157.1445003 | 0.204034563      | 0.421025525   | 0.1722721 |
| insA      | gi 49175990 ref NC_000913.2 | -      | 20233          | 20508        | 147.2112958                | 170.0704315                | 137.4563811 | 174.7734884 | 177.0807677 | -0.069886965     | 0.051894339   | 0.0088886 |
| rpsT      | gi 49175990 ref NC_000913.2 | -      | 20815          | 21078        | 12040.2732                 | 13762.83381                | 6463.127644 | 7521.144396 | 14973.76031 | 0.373464651      | 0.842534539   | 0.3956627 |
| yaaY      | gi 49175990 ref NC_000913.2 | +      | 21181          | 21399        | 793.1674056                | 1151.346742                | 618.9453858 | 812.048822  | 1432.369521 | -0.053680731     | 0.038649935   | 0.0042561 |
| ribF      | gi 49175990 ref NC_000913.2 | +      | 21407          | 22348        | 1587.577187                | 1584.280782                | 1487.286684 | 1466.499845 | 1509.829975 | 0.092376936      | 0.172023867   | 0.0541629 |
| ileS      | gi 49175990 ref NC_000913.2 | +      | 22391          | 25207        | 3987.334426                | 3916.060861                | 3639.03252  | 3233.583213 | 3715.068575 | 0.168184897      | 0.341331515   | 0.1341942 |
| lspA      | gi 49175990 ref NC_000913.2 | +      | 25207          | 25701        | 487.6148732                | 505.3119629                | 502.4803796 | 428.4867687 | 486.7762719 | 0.071001515      | 0.13377086    | 0.039995  |
| fkpB      | gi 49175990 ref NC_000913.2 | +      | 25826          | 26275        | 426.4839603                | 357.0467124                | 359.2767118 | 277.3175014 | 388.9522862 | 0.224908152      | 0.412805299   | 0.1687531 |
| ispH      | gi 49175990 ref NC_000913.2 | +      | 26277          | 27227        | 853.1387461                | 839.6218713                | 631.5148739 | 529.5287239 | 723.1825487 | 0.433092887      | 1.330326607   | 0.7169348 |
| rihC      | gi 49175990 ref NC_000913.2 | +      | 27293          | 28207        | 216.2414917                | 227.9729669                | 363.3040045 | 335.3110999 | 346.6365011 | -0.653076642     | 2.401028602   | 1.519468  |
| dapB      | gi 49175990 ref NC_000913.2 | +      | 28374          | 29195        | 333.8046234                | 271.5535327                | 371.1739218 | 297.0512597 | 198.0470933 | 0.11696835       | 0.100813943   | 0.0266333 |
| carA      | gi 49175990 ref NC_000913.2 | +      | 29651          | 30799        | 97.65688437                | 79.71055637                | 68.11635998 | 72.94978601 | 87.27444207 | 0.238603591      | 0.422963518   | 0.1734532 |
| carB      | gi 49175990 ref NC_000913.2 | +      | 30817          | 34038        | 287.0533494                | 290.6436039                | 211.2799659 | 196.451928  | 264.3675089 | 0.360773798      | 0.962072724   | 0.4683213 |
| caiF      | gi 49175990 ref NC_000913.2 | +      | 34300          | 34695        | 117.6320449                | 133.0167241                | 325.8501957 | 294.8856715 | 270.5313275 | -1.252970953     | 6.63315153    | 5.1585614 |
| caiE      | gi 49175990 ref NC_000913.2 | -      | 34781          | 35371        | 91.49976322                | 90.22285407                | 165.7669454 | 145.9485338 | 175.9630445 | -0.834960394     | 3.397623199   | 2.3511899 |
| caiD      | gi 49175990 ref NC_000913.2 | -      | 35377          | 36162        | 15.2466492                 | 13.27369267                | 13.56502865 | 20.02221958 | 14.65346984 | -0.164605027     | 0.148571294   | 0.0447558 |
| caiC      | gi 49175990 ref NC_000913.2 | -      | 36271          | 37824        | 82.5441106                 | 85.49084331                | 64.40489196 | 81.77708474 | 87.31436148 | 0.09514106       | 0.168612292   | 0.0531308 |
| caiB      | gi 49175990 ref NC_000913.2 | -      | 37898          | 39115        | 58.90991616                | 52.19963026                | 55.7634469  | 51.68630953 | 60.47134192 | 0.003676447      | 0             | 0         |
| caiA      | gi 49175990 ref NC_000913.2 | -      | 39244          | 40386        | 155.4566797                | 176.71294                  | 201.3658685 | 170.616661  | 197.3558571 | -0.204578583     | 0.371699383   | 0.1457798 |
| caiT      | gi 49175990 ref NC_000913.2 | -      | 40417          | 41931        | 21.51898876                | 19.92779635                | 28.19583795 | 30.33024767 | 36.8586733  | -0.612203899     | 1.162574513   | 0.5960224 |
| fixA      | gi 49175990 ref NC_000913.2 | +      | 42403          | 43173        | 12.46689751                | 14.26085094                | 14.69566383 | 11.38098042 | 19.9958144  | -0.210715824     | 0.133924737   | 0.039995  |
| fixB      | gi 49175990 ref NC_000913.2 | +      | 43188          | 44129        | 12.00108767                | 11.3868366                 | 16.0440849  | 15.75429081 | 18.99317689 | -0.524481449     | 0.63510387    | 0.284622  |
| fixC      | gi 49175990 ref NC_000913.2 | +      | 44180          | 45466        | 15.03982314                | 16.15301711                | 13.72858131 | 20.10700857 | 20.11686071 | -0.220761566     | 0.189814262   | 0.0611353 |
| yaaU      | gi 49175990 ref NC_000913.2 | +      | 45807          | 47138        | 20.64941375                | 13.22697546                | 24.79406856 | 18.04400412 | 19.13484574 | -0.231715727     | 0.296783347   | 0.114355  |
| kefF      | gi 49175990 ref NC_000913.2 | +      | 47246          | 47776        | 95.72697494                | 101.6472711                | 66.41917394 | 69.47470937 | 66.21784133 | 0.542284438      | 1.701076976   | 0.9810243 |
| kefC      | gi 49175990 ref NC_000913.2 | +      | 47769          | 49631        | 361.4782534                | 302.9089954                | 256.7291651 | 218.7171222 | 209.9346563 | 0.573131873      | 1.781182312   | 1.0404996 |
| folA      | gi 49175990 ref NC_000913.2 | +      | 49823          | 50302        | 326.2587137                | 320.0738907                | 246.7309797 | 202.1511055 | 282.3561182 | 0.41046407       | 1.128912637   | 0.5739941 |
| apaH      | gi 49175990 ref NC_000913.2 | -      | 50380          | 51222        | 932.1947602                | 870.941336                 | 1002.394014 | 857.8117533 | 867.2143376 | 0.00553371       | 0.014847352   | 0         |
| apaG      | gi 49175990 ref NC_000913.2 | -      | 51229          | 51606        | 1038.618969                | 1032.438328                | 1240.228381 | 1148.133905 | 1168.889516 | -0.19096464      | 0.43376361    | 0.1772001 |
| rsmA      | gi 49175990 ref NC_000913.2 | -      | 51609          | 52430        | 1676.972655                | 1775.22138                 | 1906.141761 | 1749.054989 | 1732.04936  | -0.060474857     | 0.089948919   | 0.023818  |
| pdxA      | gi 49175990 ref NC_000913.2 | -      | 52427          | 53416        | 1502.346537                | 1518.749968                | 1879.766466 | 1727.802266 | 1834.019403 | -0.262676436     | 0.604158205   | 0.2677081 |
| surA      | gi 49175990 ref NC_000913.2 | -      | 53416          | 54702        | 3041.344325                | 3087.841119                | 3347.36132  | 2957.858386 | 3754.167963 | -0.132092073     | 0.2437569     | 0.0886874 |
| lptD      | gi 49175990 ref NC_000913.2 | -      | 54755          | 57109        | 5525.240672                | 5198.285938                | 5186.344036 | 5090.10471  | 5674.702434 | 0.018996387      | 0.022438314   | 0.0005477 |
| djIA      | gi 49175990 ref NC_000913.2 | +      | 57364          | 58179        | 562.7135547                | 581.2955852                | 525.4837178 | 552.6490886 | 518.3084937 | 0.098736115      | 0.204539511   | 0.068258  |
| rluA      | gi 49175990 ref NC_000913.2 | -      | 59687          | 60346        | 316.9692707                | 294.405237                 | 331.2451177 | 293.8340429 | 293.9879738 | 0.013118564      | 0             | 0         |

|      |                             |   |        |        |             |             |             |             |             |              |             |           |
|------|-----------------------------|---|--------|--------|-------------|-------------|-------------|-------------|-------------|--------------|-------------|-----------|
| rapA | gi 49175990 ref NC_000913.2 | - | 60358  | 63264  | 859.2291838 | 901.3897653 | 762.6191735 | 723.168129  | 703.4179109 | 0.267277551  | 0.711385876 | 0.3184473 |
| polB | gi 49175990 ref NC_000913.2 | - | 63429  | 65780  | 607.7088905 | 592.6667461 | 539.544595  | 550.2729213 | 413.1808177 | 0.26995359   | 0.62274589  | 0.2777086 |
| araD | gi 49175990 ref NC_000913.2 | - | 65855  | 66550  | 20.97525259 | 18.01598722 | 32.33034777 | 24.64460155 | 14.89489501 | -0.261303439 | 0.340201168 | 0.1335789 |
| araA | gi 49175990 ref NC_000913.2 | - | 66835  | 68337  | 94.60935929 | 94.97824483 | 99.78792467 | 116.4343407 | 101.0429095 | -0.16154575  | 0.285808704 | 0.1086502 |
| araB | gi 49175990 ref NC_000913.2 | - | 68348  | 70048  | 46.4266826  | 52.26938759 | 47.67995779 | 45.98193508 | 44.91359768 | 0.084666791  | 0.12640731  | 0.0373086 |
| araC | gi 49175990 ref NC_000913.2 | + | 70387  | 71265  | 245.3256188 | 253.6097622 | 226.8114352 | 233.118969  | 209.8935161 | 0.156805947  | 0.321030517 | 0.1253096 |
| yabI | gi 49175990 ref NC_000913.2 | + | 71351  | 72115  | 433.9253738 | 377.9595487 | 407.810329  | 452.3547275 | 208.3365903 | 0.218436295  | 0.32075205  | 0.1253096 |
| thiQ | gi 49175990 ref NC_000913.2 | - | 72229  | 72927  | 170.3121014 | 171.9154581 | 164.6469435 | 195.8877593 | 143.8614641 | 0.022854885  | 0.036816215 | 0.0039338 |
| thiP | gi 49175990 ref NC_000913.2 | - | 72911  | 74521  | 175.2392291 | 184.279869  | 152.839197  | 161.4436741 | 167.070205  | 0.154106429  | 0.315783974 | 0.1236733 |
| thiB | gi 49175990 ref NC_000913.2 | - | 74497  | 75480  | 166.1468961 | 190.965372  | 107.4340293 | 98.7871072  | 112.0852927 | 0.733077401  | 2.872906486 | 1.9121685 |
| sgrR | gi 49175990 ref NC_000913.2 | - | 75644  | 77299  | 362.4937417 | 327.6363815 | 408.2474677 | 363.3604719 | 372.4752257 | -0.124958551 | 0.283236609 | 0.1073228 |
| sgrT | gi 49175990 ref NC_000913.2 | + | 77388  | 77519  | 1003.782942 | 1248.153271 | 1388.814335 | 1661.566976 | 1979.440465 | -0.618930794 | 1.772206768 | 1.0335255 |
| setA | gi 49175990 ref NC_000913.2 | + | 77621  | 78799  | 205.3263736 | 187.0704114 | 265.3964748 | 191.9329757 | 187.5866608 | -0.102210752 | 0.222495371 | 0.0773895 |
| leuD | gi 49175990 ref NC_000913.2 | - | 78848  | 79453  | 103.9027501 | 87.31750486 | 79.39559623 | 118.6467654 | 119.8104907 | -0.143350461 | 0.240576777 | 0.0867246 |
| leuC | gi 49175990 ref NC_000913.2 | - | 79464  | 80864  | 103.0582787 | 119.7283198 | 93.42470252 | 108.7161915 | 115.3932125 | 0.047028022  | 0.114659137 | 0.032275  |
| leuB | gi 49175990 ref NC_000913.2 | - | 80867  | 81958  | 76.33123776 | 75.97905793 | 79.63059606 | 93.89709571 | 65.34369142 | -0.063104966 | 0.087476487 | 0.0222447 |
| leuA | gi 49175990 ref NC_000913.2 | - | 81958  | 83529  | 123.1139843 | 118.70843   | 99.8172594  | 110.9325845 | 108.7823255 | -0.183599651 | 0.359642202 | 0.1424431 |
| leuL | gi 49175990 ref NC_000913.2 | - | 83622  | 83708  | 176.3022095 | 102.3800685 | 252.7558274 | 443.7600083 | 509.8014062 | -1.489061981 | 6.631755271 | 5.1585614 |
| leuO | gi 49175990 ref NC_000913.2 | + | 84368  | 85312  | 86.41589343 | 86.4285946  | 71.60652111 | 113.0611338 | 120.8366048 | -0.256293996 | 0.432652845 | 0.1770091 |
| ilvI | gi 49175990 ref NC_000913.2 | + | 85630  | 87354  | 195.8577787 | 178.5225622 | 220.7657386 | 181.7320558 | 171.831252  | -0.008906321 | 0.042284579 | 0.005706  |
| ilvH | gi 49175990 ref NC_000913.2 | + | 87357  | 87848  | 73.75711731 | 56.90471582 | 86.87497369 | 72.90979967 | 63.05080546 | -0.1432888   | 0.30315691  | 0.1166828 |
| cra  | gi 49175990 ref NC_000913.2 | + | 88028  | 89032  | 1856.713173 | 1688.715948 | 3599.021785 | 3337.687997 | 3212.773657 | -0.913799258 | 4.118987957 | 2.96086   |
| mraZ | gi 49175990 ref NC_000913.2 | + | 89634  | 90092  | 2295.050073 | 2650.990669 | 2633.449836 | 2454.309811 | 2660.692435 | -0.082039551 | 0.100747462 | 0.0266333 |
| rsnH | gi 49175990 ref NC_000913.2 | + | 90094  | 91035  | 1300.482485 | 1293.636869 | 1309.345181 | 1279.23134  | 1241.832474 | 0.025470206  | 0.040731739 | 0.0047328 |
| ftsL | gi 49175990 ref NC_000913.2 | + | 91032  | 91397  | 874.8822227 | 792.0925363 | 1070.853638 | 1410.44513  | 1815.455565 | -0.786275596 | 2.853808799 | 1.8961407 |
| ftsI | gi 49175990 ref NC_000913.2 | + | 91413  | 93179  | 5630.748333 | 5109.936172 | 8279.301006 | 12580.25458 | 15124.83041 | -1.169351105 | 4.820844813 | 3.5726582 |
| murE | gi 49175990 ref NC_000913.2 | + | 93166  | 94653  | 1827.791065 | 1614.616975 | 2315.941997 | 1726.663392 | 1352.248169 | -0.023001325 | 0.090305831 | 0.023835  |
| murF | gi 49175990 ref NC_000913.2 | + | 94650  | 96008  | 1436.301557 | 1367.701429 | 1577.799739 | 1345.403835 | 1150.130281 | -0.065836843 | 0.079985228 | 0.019932  |
| mraY | gi 49175990 ref NC_000913.2 | + | 96002  | 97084  | 1715.419927 | 1537.689137 | 1767.299348 | 1502.305392 | 1164.840406 | 0.168855455  | 0.255154754 | 0.0928474 |
| murD | gi 49175990 ref NC_000913.2 | + | 97087  | 98403  | 1518.946522 | 1453.186674 | 1687.79722  | 1467.526967 | 1134.541804 | 0.075879273  | 0.094850621 | 0.0251405 |
| ftsW | gi 49175990 ref NC_000913.2 | + | 98403  | 99647  | 1350.7996   | 1176.747739 | 1407.686137 | 1142.500449 | 946.0486481 | 0.152617437  | 0.220221858 | 0.0764333 |
| murG | gi 49175990 ref NC_000913.2 | + | 99644  | 100711 | 1430.499078 | 1180.52207  | 1546.991875 | 1339.671995 | 957.4028185 | 0.070212524  | 0.043906015 | 0.0060195 |
| murC | gi 49175990 ref NC_000913.2 | + | 100765 | 102240 | 1807.167187 | 1802.7373   | 1943.052018 | 1771.414066 | 1590.857998 | 0.037528319  | 0.04995505  | 0.0082424 |
| ddlB | gi 49175990 ref NC_000913.2 | + | 102233 | 103153 | 1863.495245 | 1772.320517 | 2226.739656 | 2003.44713  | 1659.404719 | -0.093255405 | 0.188747967 | 0.0611353 |
| ftsQ | gi 49175990 ref NC_000913.2 | + | 103155 | 103985 | 1870.803755 | 1605.105261 | 2434.660597 | 2097.609469 | 1598.967134 | -0.197063334 | 0.457681776 | 0.1915697 |
| ftsA | gi 49175990 ref NC_000913.2 | + | 103982 | 105244 | 1817.204586 | 1543.362846 | 2390.647784 | 1974.315337 | 1483.473242 | -0.173461249 | 0.39945628  | 0.1609792 |
| ftsZ | gi 49175990 ref NC_000913.2 | + | 105305 | 106456 | 3089.818664 | 2714.495891 | 4025.552338 | 2825.39252  | 2004.130656 | 0.022743407  | 0.029352356 | 0.0017515 |
| lpxC | gi 49175990 ref NC_000913.2 | + | 106557 | 107474 | 9381.106602 | 11116.67617 | 9078.173102 | 10211.39831 | 11420.106   | -0.031878674 | 0.006294229 | 0         |
| secM | gi 49175990 ref NC_000913.2 | + | 107705 | 108217 | 1416.823651 | 1578.635052 | 1479.768127 | 1500.237217 | 1805.690093 | -0.112131322 | 0.154853241 | 0.0487535 |
| secA | gi 49175990 ref NC_000913.2 | + | 108279 | 110984 | 5152.859717 | 4970.34315  | 5654.251204 | 4970.236018 | 5645.600356 | -0.091017908 | 0.173441399 | 0.0547682 |
| mutT | gi 49175990 ref NC_000913.2 | + | 111044 | 111433 | 106.6504142 | 133.0542468 | 113.053048  | 128.8034675 | 116.7127152 | -0.02780393  | 0.001783023 | 0         |
| yacG | gi 49175990 ref NC_000913.2 | - | 111649 | 111846 | 249.2927735 | 243.1368819 | 153.8066704 | 238.4531107 | 214.1454173 | 0.270782932  | 0.622014004 | 0.2773892 |
| yacF | gi 49175990 ref NC_000913.2 | - | 111856 | 112599 | 524.283392  | 531.8969762 | 360.932409  | 343.1968407 | 385.7531632 | 0.537141063  | 1.925082504 | 1.1444719 |
| coaE | gi 49175990 ref NC_000913.2 | - | 112599 | 113219 | 341.2548855 | 350.4881801 | 284.0357166 | 281.4690189 | 300.5487272 | 0.255951451  | 0.636284273 | 0.284622  |
| guaC | gi 49175990 ref NC_000913.2 | + | 113444 | 114487 | 855.1030351 | 991.6698461 | 457.1415085 | 499.0173179 | 610.9721308 | 0.791140372  | 3.803049702 | 2.6928224 |
| hofC | gi 49175990 ref NC_000913.2 | - | 114522 | 115724 | 107.0732218 | 113.996457  | 92.93769842 | 94.17919977 | 94.22789088 | 0.228849906  | 0.517101222 | 0.2218965 |
| hofB | gi 49175990 ref NC_000913.2 | - | 115714 | 117099 | 189.0054278 | 167.1129954 | 209.8736855 | 225.3035712 | 222.0863396 | -0.285634246 | 0.695094841 | 0.3103556 |
| ppdD | gi 49175990 ref NC_000913.2 | - | 117109 | 117549 | 24.68802869 | 22.77531561 | 17.96282496 | 32.28564064 | 26.89462953 | -0.12266204  | 0.114090074 | 0.032192  |
| naeC | gi 49175990 ref NC_000913.2 | - | 117752 | 118645 | 492.4726448 | 540.4815863 | 526.8329667 | 562.7123244 | 517.2049705 | -0.066658407 | 0.085905199 | 0.0221491 |
| ampD | gi 49175990 ref NC_000913.2 | + | 118733 | 119284 | 400.1378234 | 386.5536861 | 552.8843727 | 662.6384922 | 442.2910331 | -0.390836493 | 1.16122376  | 0.595457  |
| ampE | gi 49175990 ref NC_000913.2 | + | 119281 | 120135 | 534.153058  | 480.5526292 | 778.9147885 | 689.3769127 | 481.7833104 | -0.327514137 | 0.852754542 | 0.3997838 |
| aroP | gi 49175990 ref NC_000913.2 | - | 120178 | 121551 | 223.6948302 | 245.0863009 | 204.7914215 | 228.679794  | 237.6916638 | 0.048881024  | 0.11639253  | 0.0328174 |
| pdhR | gi 49175990 ref NC_000913.2 | + | 122092 | 122856 | 1541.238965 | 1664.102927 | 783.856484  | 907.1306999 | 1176.165818 | 0.720986969  | 3.031439148 | 2.035981  |
| aceE | gi 49175990 ref NC_000913.2 | + | 123017 | 125680 | 14262.81851 | 13076.01192 | 6545.777511 | 6120.385074 | 6080.993649 | 1.145510881  | 6.299352964 | 4.8655298 |
| aceF | gi 49175990 ref NC_000913.2 | + | 125695 | 127587 | 6506.093299 | 5673.155518 | 3293.369067 | 2891.435084 | 2467.033055 | 1.109076782  | 5.647415074 | 4.3023185 |
| lpd  | gi 49175990 ref NC_000913.2 | + | 127912 | 129336 | 8669.947163 | 8640.431529 | 5174.077237 | 5215.490389 | 4724.898953 | 0.78325756   | 3.26117508  | 2.2229695 |
| yacH | gi 49175990 ref NC_000913.2 | - | 129407 | 131260 | 100.0928305 | 108.3032238 | 120.8246033 | 139.8952145 | 106.7986853 | -0.24382768  | 0.462646738 | 0.1939831 |

|      |                             |   |        |        |             |             |             |             |             |              |              |           |
|------|-----------------------------|---|--------|--------|-------------|-------------|-------------|-------------|-------------|--------------|--------------|-----------|
| acnB | gi 49175990 ref NC_000913.2 | + | 131615 | 134212 | 3950.221795 | 3755.527003 | 5584.215103 | 4814.117726 | 3536.252276 | -0.246542624 | 0.563896507  | 0.246286  |
| yacL | gi 49175990 ref NC_000913.2 | + | 134388 | 134750 | 502.1273014 | 431.1420447 | 843.1553261 | 666.9942652 | 409.0660758 | -0.409637871 | 1.064760537  | 0.5336653 |
| speD | gi 49175990 ref NC_000913.2 | - | 134788 | 135582 | 657.4940165 | 653.4634059 | 487.7214623 | 611.9668297 | 593.2934182 | 0.206644683  | 0.48958866   | 0.2070332 |
| speE | gi 49175990 ref NC_000913.2 | - | 135598 | 136464 | 907.3509355 | 907.0658529 | 781.5253337 | 771.405989  | 814.3164452 | 0.200611593  | 0.477671187  | 0.2010025 |
| yacC | gi 49175990 ref NC_000913.2 | - | 136570 | 136917 | 809.864253  | 887.1631009 | 643.3287027 | 911.1953929 | 857.9844869 | 0.049185823  | 0.14222189   | 0.0427363 |
| cueO | gi 49175990 ref NC_000913.2 | + | 137083 | 138633 | 770.840202  | 682.8545216 | 980.0269735 | 975.2509514 | 785.5346371 | -0.307198633 | 0.871448428  | 0.4135164 |
| gcd  | gi 49175990 ref NC_000913.2 | - | 138835 | 141225 | 693.5215228 | 677.2004915 | 609.649076  | 616.3619121 | 420.0338319 | 0.332662929  | 0.802621033  | 0.3702416 |
| hpt  | gi 49175990 ref NC_000913.2 | + | 141431 | 141967 | 1471.221786 | 1577.666706 | 1611.511374 | 1382.553269 | 1494.162723 | 0.023061893  | 0.047037463  | 0.0075492 |
| can  | gi 49175990 ref NC_000913.2 | - | 142008 | 142670 | 1440.737243 | 1635.632895 | 945.2703492 | 1090.801431 | 1122.712979 | 0.520639768  | 1.904539892  | 1.1277726 |
| yadG | gi 49175990 ref NC_000913.2 | + | 142779 | 143705 | 769.5292126 | 691.409266  | 712.4725531 | 765.5807307 | 657.515621  | 0.052424542  | 0.067389316  | 0.0160372 |
| yadH | gi 49175990 ref NC_000913.2 | + | 143702 | 144472 | 494.7453022 | 484.3901253 | 528.7863056 | 522.2691593 | 389.6502481 | 0.03841679   | 0.047376501  | 0.0075492 |
| yadI | gi 49175990 ref NC_000913.2 | + | 144577 | 145017 | 155.739212  | 160.5260471 | 302.2639241 | 238.7896263 | 167.7014787 | -0.562312802 | 1.561164649  | 0.8724163 |
| yadE | gi 49175990 ref NC_000913.2 | + | 145081 | 146310 | 400.0021043 | 402.7189955 | 401.9326566 | 413.6141366 | 371.4345802 | 0.020989468  | 0.036017294  | 0.0036811 |
| panD | gi 49175990 ref NC_000913.2 | - | 146314 | 146694 | 769.038688  | 796.9045593 | 566.7319098 | 552.8578493 | 638.0761666 | 0.41081691   | 1.319661867  | 0.7093129 |
| yadD | gi 49175990 ref NC_000913.2 | + | 146968 | 147870 | 124.498033  | 144.4252864 | 254.33342   | 186.1856959 | 138.5048591 | -0.517385137 | 1.273541038  | 0.676546  |
| panC | gi 49175990 ref NC_000913.2 | - | 147944 | 148795 | 1720.465578 | 1845.513879 | 1854.196524 | 1642.558533 | 1590.771125 | 0.069447371  | 0.1272411776 | 0.0373086 |
| panB | gi 49175990 ref NC_000913.2 | - | 148807 | 149601 | 1330.364391 | 1241.366954 | 1515.163545 | 1457.59103  | 1586.040201 | -0.23122699  | 0.553217401  | 0.2395293 |
| yadC | gi 49175990 ref NC_000913.2 | - | 149715 | 150953 | 52.02029893 | 80.87387461 | 40.68498013 | 64.76976306 | 57.14878299 | 0.225546701  | 0.503252251  | 0.2141071 |
| yadK | gi 49175990 ref NC_000913.2 | - | 151003 | 151599 | 16.99970835 | 17.0929588  | 12.07375092 | 10.21781543 | 16.66670888 | 0.388905328  | 0.502780263  | 0.2138914 |
| yadL | gi 49175990 ref NC_000913.2 | - | 151626 | 152231 | 11.32137706 | 11.39392591 | 7.272172726 | 12.38375482 | 19.89217639 | -0.234756398 | 0.107714105  | 0.0288952 |
| yadM | gi 49175990 ref NC_000913.2 | - | 152243 | 152812 | 17.30655524 | 22.84114295 | 10.87606987 | 13.44362911 | 14.52333369 | 0.596397844  | 1.003603488  | 0.4957796 |
| htrE | gi 49175990 ref NC_000913.2 | - | 152829 | 155426 | 38.08872109 | 46.59094786 | 26.39900786 | 36.09315396 | 67.70680102 | -0.08183436  | 0.01032573   | 0         |
| ecpD | gi 49175990 ref NC_000913.2 | - | 155461 | 156201 | 16.98738315 | 28.59231872 | 16.21777379 | 11.48978053 | 28.75170015 | 0.215970976  | 0.298791598  | 0.1150997 |
| yadN | gi 49175990 ref NC_000913.2 | - | 156299 | 156883 | 7.015621852 | 5.4439378   | 5.679024552 | 4.576202889 | 8.848447404 | 0.030970002  | 0            | 0         |
| folK | gi 49175990 ref NC_000913.2 | - | 157253 | 157732 | 177.6251545 | 195.6971319 | 135.7819768 | 122.5326823 | 187.9511254 | 0.308480207  | 0.727867712  | 0.3261258 |
| pcnB | gi 49175990 ref NC_000913.2 | - | 157729 | 159126 | 2936.586786 | 2990.961859 | 2003.769496 | 1938.68195  | 2473.060178 | 0.463320528  | 1.402900981  | 0.7611946 |
| gluQ | gi 49175990 ref NC_000913.2 | - | 159186 | 160112 | 290.3651935 | 278.2721552 | 202.0833604 | 221.9641668 | 230.9710204 | 0.38139376   | 1.056303251  | 0.5279327 |
| dkoA | gi 49175990 ref NC_000913.2 | - | 160149 | 160604 | 4987.124739 | 5401.61423  | 3757.771742 | 3722.401069 | 4699.696158 | 0.338105796  | 0.927201623  | 0.450187  |
| sfsA | gi 49175990 ref NC_000913.2 | - | 160782 | 161486 | 361.779013  | 407.5188586 | 714.9250907 | 790.0905857 | 569.1131557 | -0.859716377 | 3.510203725  | 2.4443574 |
| ligT | gi 49175990 ref NC_000913.2 | - | 161501 | 162031 | 160.6615462 | 172.8912668 | 111.1521626 | 139.0628498 | 173.4463196 | 0.215484577  | 0.478848333  | 0.2015743 |
| hrpB | gi 49175990 ref NC_000913.2 | + | 162105 | 164534 | 626.5111996 | 634.4758875 | 644.6183869 | 603.2597565 | 624.8137736 | 0.015188902  | 0.025993125  | 0.000968  |
| mrcB | gi 49175990 ref NC_000913.2 | + | 164730 | 167264 | 1318.766748 | 1317.384177 | 967.4450433 | 973.2382578 | 1078.952203 | 0.386207     | 1.180737764  | 0.6098523 |
| fhuA | gi 49175990 ref NC_000913.2 | + | 167484 | 169727 | 1267.530016 | 1312.652337 | 627.5168096 | 577.5568483 | 661.6903363 | 1.047474432  | 6.05092013   | 4.6505207 |
| fhuC | gi 49175990 ref NC_000913.2 | + | 169778 | 170575 | 289.771414  | 274.4678757 | 98.70499082 | 69.76599902 | 80.81568185 | 1.782312111  | 12.50509335  | 10.484145 |
| fhuD | gi 49175990 ref NC_000913.2 | + | 170575 | 171465 | 174.6130131 | 183.3293854 | 58.83838592 | 40.53788453 | 41.65278568 | 1.935638405  | 14.03417737  | 11.839236 |
| fhuB | gi 49175990 ref NC_000913.2 | + | 171462 | 173444 | 372.1321589 | 319.0652967 | 166.6361837 | 129.1943102 | 154.7508839 | 1.23069662   | 6.788401165  | 5.2957581 |
| hemL | gi 49175990 ref NC_000913.2 | - | 173602 | 174882 | 1570.765905 | 1761.002035 | 1311.73906  | 1156.04494  | 1220.473363 | 0.426984987  | 1.357868876  | 0.7355514 |
| clcA | gi 49175990 ref NC_000913.2 | + | 175107 | 176528 | 896.5323757 | 920.3757621 | 1128.854743 | 1080.81447  | 1063.471596 | -0.265222571 | 0.639409197  | 0.2854905 |
| erpA | gi 49175990 ref NC_000913.2 | + | 176610 | 176954 | 438.6535525 | 420.7435925 | 430.6315067 | 397.9819053 | 346.8674464 | 0.146400163  | 0.268879045  | 0.0994014 |
| yadS | gi 49175990 ref NC_000913.2 | - | 177001 | 177624 | 175.4312061 | 172.8554609 | 181.7653665 | 183.8467697 | 177.2833731 | -0.052855    | 0.084589847  | 0.0212181 |
| btuF | gi 49175990 ref NC_000913.2 | - | 177662 | 178462 | 337.337093  | 360.9544694 | 474.7895641 | 483.10711   | 418.6052353 | -0.400692438 | 1.12675905   | 0.572223  |
| mtn  | gi 49175990 ref NC_000913.2 | - | 178455 | 179153 | 1127.686917 | 1090.363747 | 1221.024934 | 1356.511773 | 1350.505296 | -0.2398978   | 0.564582184  | 0.2463254 |
| dgt  | gi 49175990 ref NC_000913.2 | + | 180754 | 180754 | 452.7408779 | 493.9378215 | 492.7107206 | 512.4682923 | 602.1028584 | -0.196875213 | 0.375810869  | 0.1480057 |
| degP | gi 49175990 ref NC_000913.2 | + | 180884 | 182308 | 4433.487624 | 4312.127647 | 3172.475491 | 3420.540013 | 3324.81653  | 0.404364901  | 1.190412863  | 0.6164224 |
| cdaR | gi 49175990 ref NC_000913.2 | + | 182463 | 183620 | 352.2565886 | 332.4042821 | 442.9645873 | 500.7912287 | 343.6768859 | -0.315531654 | 0.787150461  | 0.3620573 |
| yaeH | gi 49175990 ref NC_000913.2 | - | 183709 | 184095 | 630.764061  | 670.5914425 | 616.8832196 | 949.1428593 | 795.2968947 | -0.299720678 | 0.635764543  | 0.284622  |
| yaeI | gi 49175990 ref NC_000913.2 | - | 184257 | 185069 | 122.6056912 | 112.9928408 | 185.6282867 | 183.8444297 | 172.8413578 | -0.604806199 | 2.030082472  | 1.2212938 |
| dapD | gi 49175990 ref NC_000913.2 | - | 185123 | 185947 | 2383.982987 | 2325.122902 | 2121.165585 | 1973.285213 | 1986.647355 | 0.223313404  | 0.472753046  | 0.1985574 |
| glnD | gi 49175990 ref NC_000913.2 | - | 185978 | 188650 | 628.8810873 | 553.6779458 | 679.8400843 | 578.6029901 | 545.3759319 | 0.003669324  | 0.033920804  | 0.0030156 |
| map  | gi 49175990 ref NC_000913.2 | - | 188712 | 189506 | 1498.424758 | 1574.807552 | 1053.540066 | 1002.455449 | 1154.092397 | 0.51377638   | 1.811309738  | 1.0592385 |
| rpsB | gi 49175990 ref NC_000913.2 | + | 189874 | 190599 | 14980.51581 | 15271.07834 | 9165.140097 | 8184.644802 | 10620.25197 | 0.694002464  | 2.59326565   | 1.6788329 |
| tsf  | gi 49175990 ref NC_000913.2 | + | 190857 | 191708 | 9668.359835 | 9196.998594 | 6478.576553 | 5669.972762 | 7788.914484 | 0.510530167  | 1.502695096  | 0.8272791 |
| pyrH | gi 49175990 ref NC_000913.2 | + | 191855 | 192580 | 875.5452212 | 785.4396361 | 739.9480496 | 659.3571253 | 686.5392999 | 0.276661586  | 0.661063273  | 0.2971548 |
| frf  | gi 49175990 ref NC_000913.2 | + | 192872 | 193429 | 2898.266704 | 2813.323821 | 2537.181798 | 2881.623157 | 2881.623157 | 0.058179256  | 0.108708161  | 0.0294058 |
| dxr  | gi 49175990 ref NC_000913.2 | + | 193521 | 194717 | 681.4773771 | 676.258168  | 933.8885562 | 978.5997357 | 821.3400021 | -0.421668997 | 1.311417033  | 0.7019367 |
| ispU | gi 49175990 ref NC_000913.2 | + | 194903 | 195664 | 1418.029053 | 1340.153332 | 1536.924397 | 1417.054795 | 1152.385113 | 0.028433252  | 0.019944442  | 0         |
| cdaA | gi 49175990 ref NC_000913.2 | + | 195677 | 196534 | 1286.315408 | 1159.667095 | 1438.636702 | 1254.583111 | 1091.759595 | -0.019257703 | 0.069823409  | 0.0170551 |

|             |                             |   |        |        |             |             |             |             |             |              |             |           |
|-------------|-----------------------------|---|--------|--------|-------------|-------------|-------------|-------------|-------------|--------------|-------------|-----------|
| <b>rseP</b> | gi 49175990 ref NC_000913.2 | + | 196546 | 197898 | 2555.364232 | 2675.637772 | 2301.471136 | 2329.560718 | 1842.22937  | 0.276066015  | 0.651260604 | 0.2917747 |
| <b>bamA</b> | gi 49175990 ref NC_000913.2 | + | 197928 | 200360 | 5784.457646 | 5634.266263 | 6506.965935 | 5534.129137 | 5714.20434  | -0.040267024 | 0.081302563 | 0.0204431 |
| <b>skp</b>  | gi 49175990 ref NC_000913.2 | + | 200482 | 200967 | 2620.298918 | 2789.623294 | 2789.888137 | 2582.096913 | 2693.289349 | 0.002742959  | 0.017127593 | 0         |
| <b>lpxD</b> | gi 49175990 ref NC_000913.2 | + | 200971 | 201996 | 5654.814025 | 5009.244633 | 5284.744384 | 5303.155271 | 6283.682483 | -0.064107515 | 0.126480473 | 0.0373086 |
| <b>fabZ</b> | gi 49175990 ref NC_000913.2 | + | 202101 | 202556 | 1296.345627 | 1426.659072 | 1245.927722 | 1163.943237 | 1394.092999 | 0.087570357  | 0.19673427  | 0.0646643 |
| <b>lpxA</b> | gi 49175990 ref NC_000913.2 | + | 202560 | 203348 | 2368.933225 | 2250.075098 | 2320.48432  | 2214.381736 | 2446.391411 | -0.003721682 | 0.012655841 | 0         |
| <b>lpxB</b> | gi 49175990 ref NC_000913.2 | + | 203348 | 204496 | 1404.268712 | 1282.19863  | 1215.047881 | 1142.502918 | 1141.983427 | 0.219721506  | 0.466749746 | 0.1956901 |
| <b>rnhB</b> | gi 49175990 ref NC_000913.2 | + | 204493 | 205089 | 522.3083564 | 450.1397231 | 475.953108  | 479.7043329 | 388.412793  | 0.143420102  | 0.23370477  | 0.0827918 |
| <b>dnaE</b> | gi 49175990 ref NC_000913.2 | + | 205126 | 208608 | 2370.397396 | 2541.725884 | 2395.630519 | 2011.569787 | 2293.893036 | 0.13248915   | 0.26367846  | 0.0969652 |
| <b>accA</b> | gi 49175990 ref NC_000913.2 | + | 208621 | 209580 | 1659.83408  | 1512.051815 | 1479.747982 | 1190.846594 | 1213.868587 | 0.317009753  | 0.732422141 | 0.3287846 |
| <b>ldcC</b> | gi 49175990 ref NC_000913.2 | + | 209679 | 211820 | 740.4510024 | 675.2693456 | 1303.187097 | 1024.570561 | 540.4605413 | -0.39253328  | 0.932676132 | 0.4530955 |
| <b>yaeR</b> | gi 49175990 ref NC_000913.2 | + | 211877 | 212266 | 236.5584749 | 239.5333172 | 300.4997076 | 291.3649611 | 196.8573436 | -0.183591937 | 0.366789708 | 0.145076  |
| <b>tilS</b> | gi 49175990 ref NC_000913.2 | + | 212331 | 213629 | 329.7495967 | 291.5345219 | 350.9792587 | 339.5599427 | 258.3809474 | -0.001039786 | 0.035452863 | 0.0036811 |
| <b>rof</b>  | gi 49175990 ref NC_000913.2 | - | 213678 | 213932 | 589.6695001 | 642.1082247 | 568.4895693 | 656.9280803 | 682.9802144 | -0.066719652 | 0.074797602 | 0.0181358 |
| <b>yaeP</b> | gi 49175990 ref NC_000913.2 | - | 213925 | 214125 | 1108.17304  | 1269.009342 | 1249.947579 | 1382.19674  | 1209.366235 | -0.128777298 | 0.197400585 | 0.0650415 |
| <b>yaeQ</b> | gi 49175990 ref NC_000913.2 | + | 214291 | 214833 | 607.0634126 | 594.5683331 | 696.4847155 | 707.389622  | 660.8002601 | -0.192017032 | 0.438245811 | 0.1793543 |
| <b>yaeJ</b> | gi 49175990 ref NC_000913.2 | + | 214833 | 215255 | 407.5174267 | 344.7038607 | 371.6727791 | 407.9632091 | 368.0201658 | -0.003555143 | 0.035268685 | 0.0036811 |
| <b>nlpE</b> | gi 49175990 ref NC_000913.2 | + | 215269 | 215979 | 627.08555   | 536.5686276 | 545.8519009 | 661.2612586 | 596.7897661 | -0.032680638 | 0.074841788 | 0.0181358 |
| <b>yaeF</b> | gi 49175990 ref NC_000913.2 | - | 216179 | 217003 | 129.9478084 | 163.4552334 | 162.3212047 | 166.0621994 | 203.8715161 | -0.309960837 | 0.568482037 | 0.2488581 |
| <b>proS</b> | gi 49175990 ref NC_000913.2 | - | 217057 | 218775 | 2697.610502 | 2616.712467 | 1756.800772 | 1750.195853 | 1931.482524 | 0.553649165  | 1.840795119 | 1.080914  |
| <b>yaeB</b> | gi 49175990 ref NC_000913.2 | - | 218887 | 219594 | 385.9270084 | 412.2438873 | 380.2209646 | 422.7573531 | 511.1493795 | -0.153315207 | 0.252266651 | 0.0919849 |
| <b>rcsF</b> | gi 49175990 ref NC_000913.2 | - | 219591 | 219995 | 610.2470783 | 715.2786574 | 561.4100616 | 548.3652336 | 626.8730502 | 0.170399660  | 0.437220007 | 0.1786609 |
| <b>metQ</b> | gi 49175990 ref NC_000913.2 | - | 220113 | 220928 | 644.7197782 | 670.5812063 | 331.7028118 | 456.2124092 | 517.8286143 | 0.57205602   | 2.0686277   | 1.2518049 |
| <b>metI</b> | gi 49175990 ref NC_000913.2 | - | 220968 | 221621 | 278.1541752 | 285.9010651 | 239.2038474 | 233.3898035 | 296.9388687 | 0.128266661  | 0.262664239 | 0.0969211 |
| <b>metN</b> | gi 49175990 ref NC_000913.2 | - | 221614 | 222645 | 188.8339728 | 218.5139892 | 162.4061236 | 174.9716368 | 205.0230649 | 0.14512873   | 0.333836787 | 0.1317706 |
| <b>gmhB</b> | gi 49175990 ref NC_000913.2 | + | 222833 | 223408 | 363.8251903 | 321.9283363 | 518.9714969 | 469.6030797 | 321.3698519 | -0.317663925 | 0.819915195 | 0.3794703 |
| <b>dkgB</b> | gi 49175990 ref NC_000913.2 | + | 229167 | 229970 | 127.1723108 | 139.6545349 | 85.9893075  | 125.3818505 | 126.5499717 | 0.215963952  | 0.498381515 | 0.2119255 |
| <b>yafC</b> | gi 49175990 ref NC_000913.2 | + | 229967 | 230881 | 235.0237934 | 211.7601961 | 192.2885669 | 208.3310121 | 164.028557  | 0.262753492  | 0.544327892 | 0.2340619 |
| <b>yafD</b> | gi 49175990 ref NC_000913.2 | + | 231122 | 231922 | 580.9066006 | 619.3027788 | 657.2393911 | 581.8658154 | 492.7673013 | 0.057458444  | 0.097851828 | 0.0262976 |
| <b>yafE</b> | gi 49175990 ref NC_000913.2 | + | 231926 | 232549 | 185.8191477 | 205.1965117 | 270.8272169 | 268.0393509 | 296.0146476 | -0.524191198 | 1.565372463 | 0.8755814 |
| <b>mltD</b> | gi 49175990 ref NC_000913.2 | - | 232597 | 233955 | 2905.449109 | 3148.660866 | 2207.940988 | 2915.049975 | 3871.524428 | -0.018188605 | 0.023955968 | 0.0005477 |
| <b>gloB</b> | gi 49175990 ref NC_000913.2 | - | 234027 | 234782 | 319.7072413 | 338.1536496 | 203.7694722 | 413.247497  | 403.4320701 | -0.085780327 | 0.05974246  | 0.0118829 |
| <b>yafS</b> | gi 49175990 ref NC_000913.2 | + | 234816 | 235538 | 329.9220396 | 336.2375239 | 367.4746264 | 385.5562797 | 338.9192225 | -0.129741209 | 0.244874789 | 0.0891953 |
| <b>rnhA</b> | gi 49175990 ref NC_000913.2 | + | 235535 | 236002 | 193.7318042 | 235.6324657 | 205.2498422 | 272.2456405 | 265.7128951 | -0.245318016 | 0.405813591 | 0.165115  |
| <b>dnaQ</b> | gi 49175990 ref NC_000913.2 | + | 236067 | 236798 | 386.5182791 | 417.9483267 | 286.9468469 | 307.1964079 | 324.067182  | 0.1738681934 | 1.184159598 | 0.6128653 |
| <b>yafT</b> | gi 49175990 ref NC_000913.2 | + | 237335 | 238120 | 24.71891764 | 34.26305041 | 20.79326111 | 37.91853826 | 35.76851796 | -0.147475927 | 0.073349766 | 0.017532  |
| <b>yafV</b> | gi 49175990 ref NC_000913.2 | - | 239419 | 240189 | 435.1521384 | 463.5327226 | 540.8898611 | 490.009003  | 480.213683  | -0.167882054 | 0.350031586 | 0.1391697 |
| <b>ivy</b>  | gi 49175990 ref NC_000913.2 | + | 240343 | 240816 | 2278.76117  | 2127.541211 | 2514.08122  | 2736.478553 | 2188.781862 | -0.15970542  | 0.330913377 | 0.1302079 |
| <b>fadE</b> | gi 49175990 ref NC_000913.2 | - | 240859 | 243303 | 168.7904993 | 150.0193584 | 204.1409868 | 188.4433389 | 197.4272681 | -0.284551511 | 0.705166629 | 0.3158832 |
| <b>lpcA</b> | gi 49175990 ref NC_000913.2 | + | 243543 | 244121 | 823.0733088 | 912.813935  | 681.9228672 | 660.4197259 | 689.8352422 | 0.343350765  | 1.0749889   | 0.5406215 |
| <b>yafJ</b> | gi 49175990 ref NC_000913.2 | + | 244327 | 245094 | 525.4180025 | 553.7602652 | 459.3223716 | 468.6988803 | 511.3753498 | 0.158886426  | 0.373193845 | 0.146713  |
| <b>yafK</b> | gi 49175990 ref NC_000913.2 | - | 245065 | 245805 | 848.8434075 | 969.8169701 | 599.1587402 | 689.5186195 | 783.7944159 | 0.367323021  | 1.185689775 | 0.6138036 |
| <b>yafQ</b> | gi 49175990 ref NC_000913.2 | - | 245961 | 246239 | 98.8211285  | 107.3548056 | 54.72608309 | 108.4758842 | 114.0354313 | 0.119807409  | 0.254828955 | 0.0928474 |
| <b>dinJ</b> | gi 49175990 ref NC_000913.2 | - | 246242 | 246502 | 371.6568865 | 368.5189377 | 203.6346144 | 369.6972592 | 402.1982969 | 0.160185108  | 0.338677938 | 0.1335511 |
| <b>yafL</b> | gi 49175990 ref NC_000913.2 | + | 246712 | 247461 | 38.48323122 | 37.98474457 | 40.88467918 | 42.46095475 | 29.41203004 | 0.032250118  | 0.022942898 | 0.0005477 |
| <b>rayT</b> | gi 49175990 ref NC_000913.2 | + | 247637 | 248134 | 127.495141  | 98.68362505 | 271.5137626 | 278.9289126 | 197.8410246 | -1.10192233  | 5.055535552 | 3.7780596 |
| <b>dinB</b> | gi 49175990 ref NC_000913.2 | + | 250898 | 251953 | 280.1880928 | 275.4337429 | 244.9033565 | 213.1051348 | 207.6574128 | 0.334199191  | 0.828555789 | 0.3853674 |
| <b>yafN</b> | gi 49175990 ref NC_000913.2 | + | 252005 | 252298 | 113.6793487 | 136.8403387 | 62.23218906 | 88.56591438 | 111.7214873 | 0.474051104  | 1.364553758 | 0.738899  |
| <b>yafO</b> | gi 49175990 ref NC_000913.2 | + | 252301 | 252699 | 70.58902559 | 72.18869309 | 37.80864502 | 48.18836529 | 54.76021535 | 0.590684936  | 1.648410527 | 0.9399544 |
| <b>yafP</b> | gi 49175990 ref NC_000913.2 | + | 252709 | 253161 | 45.10951359 | 52.27757134 | 17.9882657  | 30.13987857 | 30.15462682 | 0.864195171  | 2.54972337  | 1.6422395 |
| <b>pepD</b> | gi 49175990 ref NC_000913.2 | - | 254259 | 255716 | 3757.474756 | 3876.192639 | 5229.345447 | 4630.401996 | 4435.50754  | -0.316988722 | 0.784181516 | 0.3603755 |
| <b>gpt</b>  | gi 49175990 ref NC_000913.2 | + | 255977 | 256435 | 590.0624697 | 571.767956  | 424.2385442 | 399.146387  | 379.2711625 | 0.543926502  | 1.980822721 | 1.1844893 |
| <b>frsA</b> | gi 49175990 ref NC_000913.2 | + | 256527 | 257771 | 392.8662474 | 419.8426273 | 484.6229738 | 429.3370493 | 333.5768791 | -0.030045766 | 0.045453143 | 0.0068981 |
| <b>criI</b> | gi 49175990 ref NC_000913.2 | + | 257829 | 258230 | 1108.89884  | 1029.556776 | 960.61931   | 1095.063005 | 847.1968751 | 0.154050226  | 0.292580877 | 0.1130641 |
| <b>phoE</b> | gi 49175990 ref NC_000913.2 | - | 258269 | 259324 | 33.91101538 | 24.62285106 | 21.80876481 | 30.2127158  | 32.39382325 | 0.077575156  | 0.046593653 | 0.0074556 |
| <b>proB</b> | gi 49175990 ref NC_000913.2 | + | 259612 | 260715 | 1349.603847 | 1153.94366  | 1160.402279 | 968.8955378 | 1089.178706 | 0.251115322  | 0.521542331 | 0.2231699 |
| <b>proA</b> | gi 49175990 ref NC_000913.2 | + | 260727 | 261980 | 1048.138903 | 856.6327779 | 847.302873  | 712.1377558 | 790.8110012 | 0.316440206  | 0.72723599  | 0.3259863 |

|             |                             |   |        |        |              |             |             |             |             |              |             |           |
|-------------|-----------------------------|---|--------|--------|--------------|-------------|-------------|-------------|-------------|--------------|-------------|-----------|
| <b>ykfI</b> | gi 49175990 ref NC_000913.2 | - | 262552 | 262893 | 107.6301929  | 117.8062574 | 94.5720065  | 105.3515569 | 107.6122517 | 0.12053308   | 0.250309662 | 0.0911061 |
| <b>yafW</b> | gi 49175990 ref NC_000913.2 | - | 262914 | 263231 | 109.8734173  | 105.4095909 | 87.84172106 | 87.5584783  | 104.1337587 | 0.209849399  | 0.428813268 | 0.1756893 |
| <b>ykfH</b> | gi 49175990 ref NC_000913.2 | - | 263250 | 263471 | 45.85034552  | 36.02710562 | 31.84349902 | 27.06079093 | 35.76343693 | 0.402332663  | 0.712540622 | 0.3184473 |
| <b>ykfG</b> | gi 49175990 ref NC_000913.2 | - | 263480 | 263956 | 79.71413051  | 72.14844045 | 88.85409427 | 81.95586702 | 91.91076387 | -0.192001051 | 0.391910058 | 0.1563773 |
| <b>yafX</b> | gi 49175990 ref NC_000913.2 | - | 263972 | 264430 | 199.8483546  | 209.9247509 | 274.2954072 | 228.9448222 | 269.1318435 | -0.330934753 | 0.805712477 | 0.3714324 |
| <b>ykfF</b> | gi 49175990 ref NC_000913.2 | - | 264528 | 264767 | 64.9834634   | 84.61824613 | 93.97461798 | 94.08984681 | 78.71427694 | -0.277014834 | 0.480899847 | 0.2024127 |
| <b>ykfB</b> | gi 49175990 ref NC_000913.2 | - | 264844 | 265311 | 378.507415   | 469.3012898 | 596.7234351 | 544.9662117 | 555.3087072 | -0.442027654 | 1.220439527 | 0.635831  |
| <b>yafY</b> | gi 49175990 ref NC_000913.2 | - | 265334 | 265777 | 63.07711018  | 108.4662302 | 91.01382046 | 116.5063206 | 122.0853917 | -0.435119149 | 0.740709003 | 0.3343714 |
| <b>yafZ</b> | gi 49175990 ref NC_000913.2 | - | 266408 | 267229 | 61.16782018  | 45.5029344  | 70.98438522 | 47.38768222 | 62.76743765 | -0.133799838 | 0.27667096  | 0.1038347 |
| <b>ykfA</b> | gi 49175990 ref NC_000913.2 | - | 267321 | 268184 | 177.0725801  | 189.9871369 | 214.5606003 | 189.5823035 | 195.235944  | -0.126205928 | 0.210927832 | 0.0721266 |
| <b>perR</b> | gi 49175990 ref NC_000913.2 | - | 268513 | 269406 | 86.84771034  | 94.05527725 | 90.74848909 | 105.3492401 | 110.9188479 | -0.194990095 | 0.341592272 | 0.1341942 |
| <b>insI</b> | gi 49175990 ref NC_000913.2 | + | 269827 | 270978 | 231.7979255  | 213.6692753 | 199.6606004 | 258.7037557 | 221.0409997 | -0.021486596 | 0.030439532 | 0.0022473 |
| <b>insH</b> | gi 49175990 ref NC_000913.2 | - | 273325 | 274341 | 843.3655262  | 805.0507915 | 852.2666423 | 999.8896503 | 927.6818409 | -0.098174599 | 0.143169114 | 0.0427363 |
| <b>mmuP</b> | gi 49175990 ref NC_000913.2 | + | 274549 | 275952 | 106.2496807  | 121.6226079 | 134.0130071 | 119.0457111 | 147.8812608 | -0.24665127  | 0.470644367 | 0.1979895 |
| <b>mmuM</b> | gi 49175990 ref NC_000913.2 | + | 275939 | 276871 | 233.5671095  | 224.1339125 | 373.8174709 | 364.311162  | 319.8987951 | -0.613539217 | 2.224410497 | 1.373408  |
| <b>afuC</b> | gi 49175990 ref NC_000913.2 | - | 276980 | 278026 | 49.9038687   | 63.70777078 | 76.50545718 | 62.91280139 | 66.24052975 | -0.290523211 | 0.502156724 | 0.2134616 |
| <b>insB</b> | gi 49175990 ref NC_000913.2 | - | 278402 | 278905 | 173.1485113  | 194.7558608 | 156.9186821 | 196.9965255 | 150.5201854 | 0.109339838  | 0.227760357 | 0.0796445 |
| <b>insA</b> | gi 49175990 ref NC_000913.2 | - | 278824 | 279099 | 144.2143439  | 157.7001746 | 128.3399396 | 179.1560964 | 170.382915  | -0.102676017 | 0.114122409 | 0.032192  |
| <b>yagA</b> | gi 49175990 ref NC_000913.2 | - | 280053 | 281207 | 11.55243135  | 8.512165085 | 14.4555412  | 13.4454711  | 11.30205449 | -0.342654035 | 0.336858474 | 0.1327041 |
| <b>yagE</b> | gi 49175990 ref NC_000913.2 | + | 281502 | 282410 | 175.2547693  | 183.3278777 | 434.1674658 | 357.7236894 | 317.7540312 | -1.037126942 | 4.957753979 | 3.6941925 |
| <b>yagF</b> | gi 49175990 ref NC_000913.2 | + | 282425 | 284392 | 329.968357   | 331.4820858 | 641.3848432 | 605.2835823 | 459.2103938 | -0.772487229 | 3.222224927 | 2.1898023 |
| <b>yagG</b> | gi 49175990 ref NC_000913.2 | + | 284619 | 286001 | 52.23087557  | 55.10055251 | 92.67726624 | 47.50870371 | 62.9254965  | -0.316837484 | 0.58076136  | 0.2552364 |
| <b>yagH</b> | gi 49175990 ref NC_000913.2 | + | 286013 | 287623 | 70.60906499  | 54.0543587  | 74.89196423 | 88.54587654 | 96.29651705 | -0.451021146 | 1.172041784 | 0.6035201 |
| <b>yagI</b> | gi 49175990 ref NC_000913.2 | - | 287628 | 288386 | 167.8045265  | 209.0462407 | 170.8820789 | 143.7217132 | 170.409264  | 0.195697788  | 0.446929478 | 0.1843451 |
| <b>argF</b> | gi 49175990 ref NC_000913.2 | - | 288525 | 289529 | 111.0235002  | 87.29418241 | 70.85050899 | 49.54480356 | 55.05313065 | 0.803972606  | 2.554336662 | 1.645126  |
| <b>insB</b> | gi 49175990 ref NC_000913.2 | - | 289873 | 290376 | 236.5213267  | 242.2078946 | 281.2363832 | 274.7177336 | 279.3151371 | -0.220257185 | 0.479462725 | 0.2015743 |
| <b>insA</b> | gi 49175990 ref NC_000913.2 | - | 290295 | 290570 | 166.0744378  | 157.6436632 | 145.096409  | 138.1601176 | 195.870831  | 0.019913481  | 0.028746164 | 0.0017411 |
| <b>yagK</b> | gi 49175990 ref NC_000913.2 | - | 291546 | 292172 | 80.33300346  | 73.09990292 | 79.99918033 | 80.85580719 | 101.8179015 | -0.184281912 | 0.336635432 | 0.1327041 |
| <b>yagL</b> | gi 49175990 ref NC_000913.2 | - | 292444 | 293142 | 53.05789355  | 68.46237566 | 36.84618709 | 69.08730621 | 51.63817857 | 0.161504262  | 0.323966643 | 0.1260085 |
| <b>yagM</b> | gi 49175990 ref NC_000913.2 | - | 293169 | 294023 | 15.28876973  | 22.86166475 | 11.23228629 | 18.99728615 | 21.15720121 | 0.098723223  | 0.137983379 | 0.0415146 |
| <b>yagN</b> | gi 49175990 ref NC_000913.2 | - | 294363 | 294803 | 595.8223384  | 680.1229656 | 381.4299312 | 533.8884347 | 859.3134628 | 0.063430257  | 0.170134543 | 0.0535387 |
| <b>intF</b> | gi 49175990 ref NC_000913.2 | - | 294920 | 296320 | 332.0830465  | 379.030104  | 309.6170542 | 316.3047165 | 386.6930102 | 0.050637889  | 0.133138238 | 0.0398914 |
| <b>paoD</b> | gi 49175990 ref NC_000913.2 | - | 296994 | 297950 | 61.20510725  | 79.86820428 | 78.15335718 | 67.43784108 | 80.66535332 | -0.125489362 | 0.133307869 | 0.0399288 |
| <b>paoC</b> | gi 49175990 ref NC_000913.2 | - | 297960 | 300158 | 62.35974228  | 64.59393486 | 84.15017905 | 73.93430427 | 54.18874548 | -0.147838178 | 0.230342864 | 0.0812973 |
| <b>paoB</b> | gi 49175990 ref NC_000913.2 | - | 300155 | 301111 | 32.82446961  | 20.80167592 | 50.21139081 | 40.5413956  | 50.39479582 | -0.758957755 | 2.163953268 | 1.3270936 |
| <b>paoA</b> | gi 49175990 ref NC_000913.2 | - | 301108 | 301797 | 20.72393439  | 12.26810728 | 29.67110695 | 25.63124616 | 9.37950371  | -0.317444997 | 0.385623881 | 0.1538105 |
| <b>yagJ</b> | gi 49175990 ref NC_000913.2 | + | 302215 | 302829 | 570.6159528  | 644.975141  | 508.248511  | 379.1670217 | 376.0178309 | 0.527471037  | 1.77557944  | 1.0360689 |
| <b>ykgJ</b> | gi 49175990 ref NC_000913.2 | - | 303077 | 303406 | 62.97983669  | 65.54529824 | 62.41268377 | 51.83041568 | 74.88654203 | 0.022893802  | 0.03745033  | 0.0039338 |
| <b>yagV</b> | gi 49175990 ref NC_000913.2 | - | 303719 | 304429 | 100.4435834  | 94.95680239 | 95.51078591 | 91.98997463 | 96.44725287 | 0.053840251  | 0.073850991 | 0.0175681 |
| <b>yagW</b> | gi 49175990 ref NC_000913.2 | - | 304398 | 306041 | 140.7638936  | 136.7573803 | 164.3724288 | 155.8867591 | 157.0766077 | -0.190899073 | 0.387385793 | 0.1543669 |
| <b>yagX</b> | gi 49175990 ref NC_000913.2 | - | 306031 | 308556 | 86.874008689 | 93.10169291 | 87.82555294 | 93.06116447 | 97.51694183 | -0.055964184 | 0.052284815 | 0.0090435 |
| <b>matC</b> | gi 49175990 ref NC_000913.2 | - | 308582 | 309250 | 11.32137706  | 11.39392951 | 11.78182092 | 7.960279281 | 11.18425662 | 0.149092483  | 0.090540744 | 0.023835  |
| <b>matB</b> | gi 49175990 ref NC_000913.2 | - | 309308 | 309895 | 124.0456099  | 134.9014487 | 140.0180865 | 172.5494708 | 174.855661  | -0.347617311 | 0.751709555 | 0.3414472 |
| <b>ykgL</b> | gi 49175990 ref NC_000913.2 | + | 311336 | 311563 | 64.35661396  | 63.62945541 | 135.254472  | 101.3204724 | 161.1341961 | -1.0463397   | 4.195615427 | 3.0269108 |
| <b>ykgO</b> | gi 49175990 ref NC_000913.2 | - | 311598 | 311738 | 10.24274166  | 17.16440616 | 13.26667639 | 8.057840195 | 17.73738734 | 0.028654686  | 0.011899902 | 0         |
| <b>ykgM</b> | gi 49175990 ref NC_000913.2 | - | 311738 | 312001 | 20.5512798   | 24.72647307 | 7.434552516 | 13.55018597 | 25.36533071 | 0.502095058  | 0.763204886 | 0.3467545 |
| <b>ykgR</b> | gi 49175990 ref NC_000913.2 | - | 312365 | 312466 | 11.04507516  | 15.23598061 | 22.07828791 | 29.26238171 | 45.55085713 | -1.337081208 | 3.185166864 | 2.1650512 |
| <b>insE</b> | gi 49175990 ref NC_000913.2 | + | 314515 | 314814 | 69.31580763  | 71.24046918 | 57.90199104 | 84.97485802 | 77.33092305 | -0.07912479  | 0.08287232  | 0.0209983 |
| <b>insF</b> | gi 49175990 ref NC_000913.2 | + | 314811 | 315677 | 142.6165345  | 140.5621828 | 211.144637  | 215.2949702 | 227.6334413 | -0.622526666 | 2.084693665 | 1.2657677 |
| <b>ykgB</b> | gi 49175990 ref NC_000913.2 | - | 316950 | 317543 | 13.76364762  | 6.573728418 | 5.869356032 | 9.064264381 | 17.62712299 | -0.05522774  | 0.058025536 | 0.0110921 |
| <b>ykgC</b> | gi 49175990 ref NC_000913.2 | - | 317900 | 319225 | 88.26966969  | 69.25245481 | 71.79248726 | 95.95536436 | 54.24212144 | 0.117161414  | 0.130988936 | 0.0392301 |
| <b>ykgD</b> | gi 49175990 ref NC_000913.2 | + | 319451 | 320305 | 70.25785441  | 82.68447937 | 75.80416789 | 67.4958592  | 92.82521016 | -0.06317587  | 0.043761479 | 0.0060195 |
| <b>ykgE</b> | gi 49175990 ref NC_000913.2 | + | 320832 | 321551 | 1037.290224  | 877.5442327 | 1323.549526 | 698.2469054 | 1629.072752 | -0.315559792 | 0.676246126 | 0.3033725 |
| <b>ykgF</b> | gi 49175990 ref NC_000913.2 | + | 321562 | 321989 | 172.2502828  | 152.7236364 | 255.0465994 | 1382.083457 | 2820.55829  | -0.443650584 | 1.052134801 | 0.5260812 |
| <b>ykgG</b> | gi 49175990 ref NC_000913.2 | + | 322982 | 323677 | 750.5675356  | 566.9072129 | 1422.261966 | 690.3726082 | 1411.795144 | -0.779260486 | 2.56986965  | 1.6580558 |
| <b>ykgH</b> | gi 49175990 ref NC_000913.2 | - | 323920 | 324588 | 20.28609088  | 29.51734971 | 16.87078728 | 18.26317972 | 48.59226538 | -0.225118699 | 0.116626757 | 0.0329224 |
| <b>betA</b> | gi 49175990 ref NC_000913.2 | - | 324801 | 326471 | 509.6840836  | 439.6923383 | 473.0163756 | 450.5843778 | 354.8295171 | 0.184428897  | 0.315105808 | 0.1234768 |

|             |                             |   |        |        |             |             |             |             |             |              |             |           |
|-------------|-----------------------------|---|--------|--------|-------------|-------------|-------------|-------------|-------------|--------------|-------------|-----------|
| <b>betB</b> | gi 49175990 ref NC_000913.2 | - | 326485 | 327957 | 724.3589698 | 603.0426878 | 655.9034433 | 579.6246247 | 490.5258916 | 0.242378535  | 0.452738253 | 0.1880015 |
| <b>betI</b> | gi 49175990 ref NC_000913.2 | - | 327971 | 328558 | 540.9898634 | 606.0284683 | 385.2995583 | 487.3785924 | 399.4724491 | 0.41263881   | 1.356906824 | 0.7355514 |
| <b>betT</b> | gi 49175990 ref NC_000913.2 | + | 328687 | 330720 | 1245.052196 | 1204.341305 | 651.9504449 | 951.0750014 | 533.3710454 | 0.780364605  | 2.920820536 | 1.9503926 |
| <b>yahA</b> | gi 49175990 ref NC_000913.2 | + | 331595 | 332683 | 178.4631641 | 183.320417  | 126.8815406 | 138.0861316 | 192.4394408 | 0.231329645  | 0.491226096 | 0.2082617 |
| <b>yahB</b> | gi 49175990 ref NC_000913.2 | - | 332725 | 333657 | 263.2863322 | 247.8708302 | 353.6512642 | 390.246377  | 470.7789674 | -0.664702277 | 2.438131166 | 1.5508507 |
| <b>yahC</b> | gi 49175990 ref NC_000913.2 | - | 333749 | 334246 | 11.47292111 | 9.472694187 | 12.32362763 | 21.07554961 | 13.55985891 | -0.566339563 | 0.77804876  | 0.3565003 |
| <b>yahD</b> | gi 49175990 ref NC_000913.2 | + | 334504 | 335109 | 37.30269124 | 35.1238187  | 70.09791865 | 70.53925661 | 57.40505075 | -0.853056612 | 2.801133236 | 1.8492302 |
| <b>yahE</b> | gi 49175990 ref NC_000913.2 | + | 335149 | 336012 | 12.94714133 | 17.13379788 | 26.30676008 | 14.88313051 | 30.05236076 | -0.673997441 | 1.100524294 | 0.5577652 |
| <b>yahF</b> | gi 49175990 ref NC_000913.2 | + | 336002 | 337549 | 17.50269932 | 10.37699816 | 27.39760817 | 25.67693761 | 14.86126198 | -0.637534046 | 1.098104802 | 0.5577652 |
| <b>yahG</b> | gi 49175990 ref NC_000913.2 | + | 337549 | 338967 | 54.74538166 | 57.95133836 | 62.24222202 | 64.91871882 | 52.89571912 | -0.094340362 | 0.132066426 | 0.0394194 |
| <b>yahI</b> | gi 49175990 ref NC_000913.2 | + | 339389 | 340339 | 24.1400704  | 20.86413237 | 27.99145886 | 28.07490738 | 31.34288425 | -0.357242726 | 0.600547751 | 0.2668653 |
| <b>yahJ</b> | gi 49175990 ref NC_000913.2 | + | 340349 | 341731 | 136.4609085 | 127.2436998 | 148.1675573 | 123.4972389 | 135.7395157 | -0.026857739 | 0.05293833  | 0.0090435 |
| <b>yahK</b> | gi 49175990 ref NC_000913.2 | + | 342108 | 343157 | 531.2869523 | 529.0389727 | 519.1965202 | 422.8144898 | 410.7552046 | 0.245631422  | 0.55948162  | 0.2438129 |
| <b>yahL</b> | gi 49175990 ref NC_000913.2 | + | 343400 | 344215 | 6.168052763 | 7.610823367 | 4.789166473 | 13.45714217 | 20.95886236 | -0.963642907 | 1.16611607  | 0.5987772 |
| <b>yahM</b> | gi 49175990 ref NC_000913.2 | + | 344628 | 344873 | 164.3723213 | 181.4502549 | 137.5920774 | 183.708522  | 184.9121489 | 0.00926276   | 0.054176821 | 0.0096379 |
| <b>yahN</b> | gi 49175990 ref NC_000913.2 | - | 344890 | 345561 | 61.38221532 | 74.14258302 | 148.762647  | 165.7829605 | 144.8150847 | -1.199039526 | 5.787021929 | 4.412636  |
| <b>yahO</b> | gi 49175990 ref NC_000913.2 | + | 345708 | 345983 | 270.0190186 | 271.6445126 | 153.2531021 | 909.5950633 | 455.6542798 | -0.955372198 | 1.574972052 | 0.8819071 |
| <b>prpR</b> | gi 49175990 ref NC_000913.2 | - | 346081 | 347667 | 49.43245944 | 43.65288817 | 57.28033386 | 67.12341165 | 57.29553668 | -0.36794635  | 0.816334595 | 0.378439  |
| <b>prpB</b> | gi 49175990 ref NC_000913.2 | + | 347906 | 348796 | 36.28601452 | 29.39141695 | 36.04570062 | 35.96371412 | 43.60323086 | -0.210733979 | 0.342017944 | 0.1341942 |
| <b>prpC</b> | gi 49175990 ref NC_000913.2 | + | 349236 | 350405 | 19.26544854 | 23.78042987 | 25.23541275 | 25.52826904 | 27.95337884 | -0.247633357 | 0.240863917 | 0.0867246 |
| <b>prpD</b> | gi 49175990 ref NC_000913.2 | + | 350439 | 351890 | 13.51378961 | 9.45293239  | 17.1671513  | 20.02454139 | 11.41452585 | -0.456167585 | 0.517459569 | 0.2218965 |
| <b>prpE</b> | gi 49175990 ref NC_000913.2 | + | 351930 | 353816 | 38.7280416  | 33.20172032 | 54.03801218 | 44.95234782 | 47.16212235 | -0.412623102 | 0.896192856 | 0.4292932 |
| <b>codB</b> | gi 49175990 ref NC_000913.2 | + | 354146 | 355405 | 150.1467281 | 187.1992367 | 250.5283016 | 216.1680654 | 117.383577  | -0.215500094 | 0.330069487 | 0.1299192 |
| <b>codA</b> | gi 49175990 ref NC_000913.2 | + | 355395 | 356678 | 285.216969  | 282.0850443 | 370.6835762 | 340.7300929 | 261.766465  | -0.181335841 | 0.385295573 | 0.1537791 |
| <b>cynR</b> | gi 49175990 ref NC_000913.2 | - | 357015 | 357914 | 58.60692341 | 59.84016454 | 48.34409174 | 56.09587482 | 67.06971839 | 0.039488795  | 0.064689204 | 0.0146814 |
| <b>cynT</b> | gi 49175990 ref NC_000913.2 | + | 358023 | 358682 | 49.85589888 | 35.04913698 | 46.65240797 | 29.29974926 | 26.04692138 | 0.379114443  | 0.512485983 | 0.2202171 |
| <b>cynS</b> | gi 49175990 ref NC_000913.2 | + | 358713 | 359183 | 21.33679383 | 22.80356314 | 30.36581764 | 30.21879881 | 24.80993137 | -0.366545879 | 0.522157538 | 0.2235589 |
| <b>cynX</b> | gi 49175990 ref NC_000913.2 | + | 359216 | 360370 | 58.679904   | 57.93024078 | 52.98120991 | 46.10819237 | 54.88112629 | 0.188062809  | 0.315089935 | 0.1234768 |
| <b>lacA</b> | gi 49175990 ref NC_000913.2 | - | 360473 | 361084 | 20.72484343 | 21.8509464  | 19.55155048 | 45.49511333 | 29.25344501 | -0.58632752  | 0.903638004 | 0.4348327 |
| <b>lacY</b> | gi 49175990 ref NC_000913.2 | - | 361150 | 362403 | 53.54438203 | 55.09317607 | 55.11143632 | 70.57208731 | 76.09254979 | -0.321902774 | 0.586442284 | 0.2584339 |
| <b>lacZ</b> | gi 49175990 ref NC_000913.2 | - | 362455 | 365529 | 291.3025159 | 253.5362133 | 445.0993901 | 374.593595  | 372.5585539 | -0.516743575 | 1.813047544 | 1.059862  |
| <b>lacI</b> | gi 49175990 ref NC_000913.2 | - | 365652 | 366734 | 291.1447964 | 324.8799221 | 301.0078427 | 289.2799855 | 283.8621726 | 0.06752931   | 0.145447837 | 0.043659  |
| <b>mhpR</b> | gi 49175990 ref NC_000913.2 | - | 366811 | 367644 | 37.06659352 | 39.90662288 | 38.89731695 | 26.98492087 | 21.56381024 | 0.411162532  | 0.707907791 | 0.3175779 |
| <b>mhpA</b> | gi 49175990 ref NC_000913.2 | + | 367835 | 369499 | 12.15364473 | 9.465922042 | 6.322489501 | 6.819960152 | 15.35781342 | 0.339161928  | 0.263321937 | 0.0969652 |
| <b>mhpB</b> | gi 49175990 ref NC_000913.2 | + | 369501 | 370445 | 10.35399358 | 6.604536695 | 7.794733578 | 3.553296655 | 13.1881746  | 0.143932302  | 0.015068113 | 0         |
| <b>mhpC</b> | gi 49175990 ref NC_000913.2 | + | 370448 | 371329 | 14.5612687  | 23.82777382 | 18.87022943 | 24.56151091 | 21.3345719  | -0.221605294 | 0.179290741 | 0.0569389 |
| <b>mhpD</b> | gi 49175990 ref NC_000913.2 | + | 371339 | 372148 | 11.17903394 | 13.31509575 | 10.76348889 | 12.31997721 | 12.32612428 | 0.036789151  | 0.047350866 | 0.0075492 |
| <b>mhpF</b> | gi 49175990 ref NC_000913.2 | + | 372145 | 373095 | 18.82996483 | 19.95161321 | 21.0746892  | 18.00088795 | 19.0898312  | 0.001683619  | 0           | 0         |
| <b>mhpE</b> | gi 49175990 ref NC_000913.2 | + | 373092 | 374105 | 28.63962235 | 23.70240135 | 37.52612323 | 20.42145015 | 24.77873552 | -0.03513852  | 0.07078317  | 0.0170551 |
| <b>mhpT</b> | gi 49175990 ref NC_000913.2 | + | 374683 | 375894 | 62.39221186 | 47.40738504 | 57.92373351 | 54.8467808  | 40.65187286 | 0.14194577   | 0.131534803 | 0.0394194 |
| <b>yaiI</b> | gi 49175990 ref NC_000913.2 | + | 375996 | 376535 | 340.0982571 | 278.2043238 | 298.7242249 | 322.8050123 | 305.1474435 | 0.026124278  | 0           | 0         |
| <b>frmB</b> | gi 49175990 ref NC_000913.2 | - | 376759 | 377592 | 628.274855  | 661.0884804 | 566.5909035 | 471.2659368 | 677.1165575 | 0.165632152  | 0.355509159 | 0.1411458 |
| <b>frmA</b> | gi 49175990 ref NC_000913.2 | - | 377686 | 378795 | 1338.610953 | 1233.762673 | 1141.867395 | 977.825351  | 1065.648953 | 0.2941015    | 0.711952254 | 0.3184473 |
| <b>frmR</b> | gi 49175990 ref NC_000913.2 | - | 378830 | 379105 | 719.5434167 | 672.431147  | 696.4566378 | 480.1824221 | 519.5492971 | 0.327050913  | 0.736424122 | 0.3311722 |
| <b>yaiO</b> | gi 49175990 ref NC_000913.2 | - | 379293 | 380066 | 53.70002012 | 51.27200331 | 76.99138828 | 74.06962629 | 80.70471593 | -0.550952824 | 1.531014694 | 0.850008  |
| <b>insC</b> | gi 49175990 ref NC_000913.2 | + | 380575 | 380940 | 771.9121241 | 869.1296598 | 818.6704563 | 801.6946591 | 858.0486795 | -0.027410604 | 0.011795361 | 0         |
| <b>insD</b> | gi 49175990 ref NC_000913.2 | + | 380898 | 381803 | 1304.219969 | 1315.489158 | 1105.338825 | 1160.339745 | 1134.081667 | 0.205824882  | 0.492138024 | 0.2085595 |
| <b>yaiP</b> | gi 49175990 ref NC_000913.2 | - | 381963 | 383159 | 41.23132685 | 50.39190707 | 29.83684249 | 29.4080616  | 54.44761097 | 0.238326369  | 0.41428724  | 0.1691717 |
| <b>yaiS</b> | gi 49175990 ref NC_000913.2 | - | 383283 | 383840 | 9.161871468 | 4.697087733 | 4.174995787 | 4.542453555 | 7.741767825 | 0.378728219  | 0.15603393  | 0.0487535 |
| <b>tauA</b> | gi 49175990 ref NC_000913.2 | + | 384456 | 385418 | 7.240491805 | 11.44100563 | 15.81223569 | 13.51010582 | 14.59324772 | -0.674802436 | 0.787427507 | 0.3620733 |
| <b>tauB</b> | gi 49175990 ref NC_000913.2 | + | 385431 | 386198 | 7.015621852 | 5.679024552 | 11.73594348 | 10.09048538 | 7.949291262 | -0.605027292 | 0.60694555  | 0.2686404 |
| <b>tauC</b> | gi 49175990 ref NC_000913.2 | + | 386195 | 387022 | 16.67320052 | 12.30162047 | 6.984573265 | 13.29328579 | 9.021564622 | 0.580841527  | 0.697816935 | 0.3113985 |
| <b>tauD</b> | gi 49175990 ref NC_000913.2 | + | 387019 | 387870 | 79.74661684 | 71.19423422 | 61.18898883 | 72.66826771 | 56.2567588  | 0.263744379  | 0.495370764 | 0.2099578 |
| <b>hemB</b> | gi 49175990 ref NC_000913.2 | - | 387977 | 388951 | 1209.391353 | 1284.169968 | 1153.947006 | 1060.68493  | 1072.43622  | 0.181883547  | 0.423223224 | 0.1735234 |
| <b>insF</b> | gi 49175990 ref NC_000913.2 | - | 390963 | 391829 | 119.3562085 | 143.4892626 | 157.5807674 | 262.7854118 | 168.5435973 | -0.616435249 | 1.518053221 | 0.8390878 |
| <b>insE</b> | gi 49175990 ref NC_000913.2 | - | 391826 | 392125 | 90.70480307 | 74.01307245 | 72.26103168 | 90.70035483 | 89.64637726 | -0.016295065 | 0.032502535 | 0.0030156 |
| <b>yaiV</b> | gi 49175990 ref NC_000913.2 | + | 393730 | 394353 | 17.60801716 | 29.54362067 | 26.70872183 | 25.8799017  | 32.39751735 | -0.317846677 | 0.335799713 | 0.1322937 |

|             |                             |   |        |        |             |             |             |             |             |              |             |           |
|-------------|-----------------------------|---|--------|--------|-------------|-------------|-------------|-------------|-------------|--------------|-------------|-----------|
| <b>ampH</b> | gi 49175990 ref NC_000913.2 | - | 394354 | 395511 | 327.6804454 | 372.3793654 | 386.5917321 | 419.3353721 | 461.9603133 | -0.295861233 | 0.645433692 | 0.2883723 |
| <b>sbmA</b> | gi 49175990 ref NC_000913.2 | + | 395863 | 397083 | 237.1239518 | 245.0612711 | 251.7227551 | 212.101615  | 242.2443343 | 0.035555241  | 0.055398407 | 0.0102387 |
| <b>yaiW</b> | gi 49175990 ref NC_000913.2 | + | 397096 | 398190 | 393.106237  | 390.3652557 | 402.1595299 | 385.8181556 | 447.3924996 | -0.072652663 | 0.123692983 | 0.0368896 |
| <b>yaiY</b> | gi 49175990 ref NC_000913.2 | - | 398249 | 398557 | 38.39068102 | 39.89760744 | 42.90416527 | 52.61006171 | 51.54448362 | -0.334568562 | 0.564677286 | 0.2463254 |
| <b>yaiZ</b> | gi 49175990 ref NC_000913.2 | + | 398817 | 399029 | 144.5089703 | 142.461887  | 148.1360013 | 111.2572198 | 304.3874605 | -1.375069813 | 7.783319784 | 6.1945947 |
| <b>ddlA</b> | gi 49175990 ref NC_000913.2 | - | 399053 | 400147 | 1305.559614 | 1287.934042 | 1181.989976 | 1027.224911 | 1253.908087 | 0.171630341  | 0.3634977   | 0.1434578 |
| <b>iraP</b> | gi 49175990 ref NC_000913.2 | + | 400610 | 400870 | 216.8972682 | 279.3505565 | 202.4941936 | 404.3674327 | 425.7517108 | -0.5370724   | 1.04048087  | 0.5204761 |
| <b>phoA</b> | gi 49175990 ref NC_000913.2 | + | 400971 | 402386 | 282.4409061 | 247.8409538 | 263.0476533 | 269.1631353 | 307.15952   | -0.064128763 | 0.127523238 | 0.0373086 |
| <b>psiF</b> | gi 49175990 ref NC_000913.2 | + | 402505 | 402825 | 129.2384159 | 167.266241  | 121.6396461 | 162.4066841 | 162.4903481 | -0.052207612 | 0           | 0         |
| <b>adrA</b> | gi 49175990 ref NC_000913.2 | + | 402927 | 404042 | 95.88005078 | 95.92684522 | 94.49732128 | 92.08569299 | 115.2968644 | -0.072958222 | 0.09756009  | 0.0262976 |
| <b>proC</b> | gi 49175990 ref NC_000913.2 | - | 404059 | 404868 | 409.7708378 | 455.9541343 | 465.6765934 | 459.6959116 | 464.4025912 | -0.091233707 | 0.179934338 | 0.0572997 |
| <b>yaiC</b> | gi 49175990 ref NC_000913.2 | + | 404988 | 405446 | 452.0583364 | 414.0743122 | 455.2341006 | 498.7671375 | 445.4365394 | -0.096749107 | 0.198314781 | 0.0652279 |
| <b>aroL</b> | gi 49175990 ref NC_000913.2 | + | 405629 | 406153 | 692.6749932 | 599.2607422 | 658.3224929 | 769.9575543 | 629.4850342 | -0.069310303 | 0.154455854 | 0.0487404 |
| <b>yaiA</b> | gi 49175990 ref NC_000913.2 | + | 406203 | 406394 | 995.8158359 | 1154.087703 | 1282.493793 | 1560.53801  | 1635.274532 | -0.505713701 | 1.414554268 | 0.7686126 |
| <b>aroM</b> | gi 49175990 ref NC_000913.2 | + | 406652 | 407329 | 388.0969267 | 380.861856  | 228.4246953 | 347.3883312 | 385.4481187 | 0.244344128  | 0.574801764 | 0.2512697 |
| <b>yaiE</b> | gi 49175990 ref NC_000913.2 | + | 407401 | 407685 | 1294.491565 | 1408.601718 | 1944.888053 | 1785.021132 | 1998.83064  | -0.509289357 | 1.515427165 | 0.8369706 |
| <b>rdgC</b> | gi 49175990 ref NC_000913.2 | - | 408332 | 409243 | 268.3267248 | 309.6975862 | 197.8739805 | 204.0605027 | 210.8322103 | 0.478782223  | 1.593923788 | 0.8940999 |
| <b>mak</b>  | gi 49175990 ref NC_000913.2 | + | 409368 | 410276 | 323.0262999 | 266.8110468 | 463.4053121 | 364.1919853 | 177.0142834 | -0.128799877 | 0.2721267   | 0.1011126 |
| <b>araJ</b> | gi 49175990 ref NC_000913.2 | - | 410521 | 411705 | 203.057312  | 258.4485248 | 221.4979085 | 220.8470163 | 210.9582439 | 0.052175184  | 0.143849185 | 0.0431373 |
| <b>sbcB</b> | gi 49175990 ref NC_000913.2 | - | 411831 | 414977 | 348.9252603 | 347.6252045 | 354.4696195 | 386.6950103 | 362.362273  | -0.080903146 | 0.137800814 | 0.0415035 |
| <b>sbcD</b> | gi 49175990 ref NC_000913.2 | - | 414974 | 416176 | 268.5063534 | 292.5753449 | 270.673527  | 242.3864647 | 298.1756228 | 0.041533396  | 0.08981844  | 0.023818  |
| <b>phoB</b> | gi 49175990 ref NC_000913.2 | + | 416366 | 417055 | 154.597206  | 122.4330153 | 119.6792291 | 133.3251479 | 125.6530369 | 0.160462902  | 0.25530879  | 0.0928474 |
| <b>phoR</b> | gi 49175990 ref NC_000913.2 | + | 417113 | 418408 | 192.0934113 | 173.7706017 | 169.9358432 | 168.2333152 | 180.5238857 | 0.09362675   | 0.137631131 | 0.0414936 |
| <b>brnQ</b> | gi 49175990 ref NC_000913.2 | + | 418815 | 420134 | 1183.497131 | 1265.176958 | 985.3095652 | 1289.042377 | 1172.175861 | 0.071301609  | 0.174173136 | 0.0547989 |
| <b>proY</b> | gi 49175990 ref NC_000913.2 | + | 420210 | 421583 | 563.9775968 | 582.2451151 | 464.4442518 | 488.7395408 | 455.4993854 | 0.282219005  | 0.762987907 | 0.3467545 |
| <b>malZ</b> | gi 49175990 ref NC_000913.2 | + | 421742 | 423556 | 291.6193223 | 280.1728466 | 488.2045159 | 373.4733432 | 327.9164948 | -0.448846155 | 1.333551223 | 0.7180515 |
| <b>acpH</b> | gi 49175990 ref NC_000913.2 | - | 423561 | 424142 | 171.1067134 | 163.3446836 | 164.4903294 | 169.2282786 | 154.9016236 | 0.045115092  | 0.060129589 | 0.0118829 |
| <b>queA</b> | gi 49175990 ref NC_000913.2 | + | 424235 | 425305 | 805.4699513 | 729.4052217 | 618.3243571 | 642.3561269 | 608.043097  | 0.314490553  | 0.821196331 | 0.3800739 |
| <b>tgt</b>  | gi 49175990 ref NC_000913.2 | + | 425361 | 426488 | 1885.321964 | 1929.074491 | 1590.657348 | 1375.923761 | 1721.632589 | 0.285495754  | 0.691816298 | 0.3097886 |
| <b>yajC</b> | gi 49175990 ref NC_000913.2 | + | 426511 | 426843 | 2865.080012 | 3091.670062 | 2360.020576 | 1927.598555 | 2524.767746 | 0.383385243  | 1.053577162 | 0.5264481 |
| <b>secD</b> | gi 49175990 ref NC_000913.2 | + | 426871 | 428718 | 3471.234401 | 3352.814468 | 3040.508938 | 2618.086142 | 2962.437006 | 0.257295917  | 0.59529756  | 0.2640643 |
| <b>secF</b> | gi 49175990 ref NC_000913.2 | + | 428729 | 429700 | 1482.571838 | 1331.581081 | 1644.012564 | 1335.385743 | 1197.215252 | 0.044718427  | 0.027045778 | 0.0014853 |
| <b>yajD</b> | gi 49175990 ref NC_000913.2 | + | 429829 | 430176 | 292.3467169 | 332.4869935 | 258.0823024 | 293.7538039 | 330.6585733 | 0.060173188  | 0.154532056 | 0.0487404 |
| <b>tsx</b>  | gi 49175990 ref NC_000913.2 | - | 430353 | 431237 | 3103.874794 | 3710.04793  | 3932.614479 | 3929.688985 | 4281.53206  | -0.276866593 | 0.559779818 | 0.2438905 |
| <b>yajI</b> | gi 49175990 ref NC_000913.2 | - | 431536 | 432075 | 96.52191907 | 122.6114015 | 119.4036061 | 130.9976741 | 105.6438223 | -0.144860782 | 0.185579506 | 0.0597732 |
| <b>nrdR</b> | gi 49175990 ref NC_000913.2 | + | 432226 | 432675 | 603.1647901 | 610.7305035 | 755.2341488 | 641.3246719 | 545.514014  | -0.081941525 | 0.162854888 | 0.0516644 |
| <b>ribD</b> | gi 49175990 ref NC_000913.2 | + | 432679 | 433782 | 991.9999188 | 964.9915062 | 1174.82556  | 1110.952735 | 893.2593135 | -0.102635925 | 0.210198843 | 0.0715761 |
| <b>ribE</b> | gi 49175990 ref NC_000913.2 | + | 433871 | 434341 | 1430.574325 | 1381.005274 | 1214.258942 | 1346.36993  | 1256.381216 | 0.145444841  | 0.29774082  | 0.1148535 |
| <b>nusB</b> | gi 49175990 ref NC_000913.2 | + | 434361 | 434780 | 1986.176543 | 2094.356318 | 1993.801974 | 1621.52064  | 2101.896298 | 0.094388738  | 0.175195494 | 0.0550844 |
| <b>thiL</b> | gi 49175990 ref NC_000913.2 | + | 434858 | 435835 | 440.1765644 | 390.3148232 | 503.13255   | 424.9382458 | 355.9531239 | -0.013740512 | 0.06670165  | 0.0157502 |
| <b>pgpA</b> | gi 49175990 ref NC_000913.2 | + | 435813 | 436331 | 914.0472341 | 981.1849588 | 1168.797872 | 1190.59493  | 1106.136639 | -0.294901152 | 0.713838672 | 0.3184473 |
| <b>yajO</b> | gi 49175990 ref NC_000913.2 | - | 436385 | 437359 | 861.4026062 | 832.9649541 | 1182.979884 | 1145.718499 | 963.852508  | -0.362648349 | 1.027327755 | 0.5140349 |
| <b>dxs</b>  | gi 49175990 ref NC_000913.2 | - | 437539 | 439401 | 2070.10144  | 2181.738768 | 2189.173676 | 2097.785825 | 2336.444973 | -0.062729677 | 0.08580529  | 0.0221491 |
| <b>ispA</b> | gi 49175990 ref NC_000913.2 | - | 439426 | 440325 | 1126.0828   | 1201.538622 | 1298.682711 | 1175.116495 | 1296.661289 | -0.117591939 | 0.210903296 | 0.0721266 |
| <b>xseB</b> | gi 49175990 ref NC_000913.2 | - | 440325 | 440567 | 814.010215  | 802.5800827 | 799.9006102 | 669.6472492 | 875.8074715 | 0.051977411  | 0.086852038 | 0.0222447 |
| <b>thiI</b> | gi 49175990 ref NC_000913.2 | + | 440773 | 442221 | 1057.100353 | 997.2706882 | 735.3592032 | 753.4890704 | 844.4797358 | 0.045417376  | 1.209184841 | 0.6262121 |
| <b>yajL</b> | gi 49175990 ref NC_000913.2 | - | 442275 | 442865 | 267.6980894 | 261.1754024 | 296.5410971 | 249.0248496 | 249.1554129 | 0.025829257  | 0.016965623 | 0         |
| <b>panE</b> | gi 49175990 ref NC_000913.2 | - | 442828 | 443739 | 577.8012404 | 606.9483108 | 615.8844127 | 689.3546096 | 625.9992618 | -0.130142806 | 0.230901846 | 0.0815678 |
| <b>yajQ</b> | gi 49175990 ref NC_000913.2 | + | 443907 | 444398 | 3460.083955 | 3766.040701 | 3165.431768 | 2698.892109 | 3400.866687 | 0.216041157  | 0.514436745 | 0.2209121 |
| <b>yajR</b> | gi 49175990 ref NC_000913.2 | - | 444526 | 445890 | 236.2734885 | 262.1887668 | 187.4509511 | 198.479198  | 217.4645014 | 0.459236664  | 0.760155029 | 0.3458636 |
| <b>cyoE</b> | gi 49175990 ref NC_000913.2 | - | 446039 | 446929 | 2519.075405 | 2417.246829 | 1947.188175 | 1584.471259 | 1905.715605 | 0.297326664  | 1.293561005 | 0.6901153 |
| <b>cyoD</b> | gi 49175990 ref NC_000913.2 | - | 446941 | 447270 | 812.2514717 | 770.2683578 | 702.4660572 | 574.222489  | 606.9417736 | 0.350281801  | 0.934154178 | 0.4539297 |
| <b>cyoC</b> | gi 49175990 ref NC_000913.2 | - | 447270 | 447884 | 1072.015777 | 1079.935231 | 1039.820618 | 864.6794761 | 1044.200604 | 0.133995152  | 0.262566377 | 0.0969211 |
| <b>cyoB</b> | gi 49175990 ref NC_000913.2 | - | 447874 | 449865 | 2482.347576 | 2470.453815 | 2782.936244 | 2333.313463 | 2560.927199 | -0.039815444 | 0.073009532 | 0.017532  |
| <b>cyoA</b> | gi 49175990 ref NC_000913.2 | - | 449887 | 450834 | 2020.937683 | 2097.198004 | 2369.393934 | 2189.724941 | 2371.293834 | -0.169296974 | 0.321989517 | 0.1253096 |
| <b>ampG</b> | gi 49175990 ref NC_000913.2 | - | 451294 | 452769 | 788.2910748 | 743.6712572 | 530.0782552 | 578.6027577 | 694.0108667 | 0.349528853  | 0.97900591  | 0.4786629 |
| <b>yajG</b> | gi 49175990 ref NC_000913.2 | - | 452813 | 453391 | 933.3380777 | 902.3010467 | 696.1174255 | 767.015274  | 994.4887265 | 0.15737134   | 0.342702422 | 0.1341942 |

|             |                             |   |        |        |             |             |              |             |              |              |             |           |
|-------------|-----------------------------|---|--------|--------|-------------|-------------|--------------|-------------|--------------|--------------|-------------|-----------|
| <b>bolA</b> | gi 49175990 ref NC_000913.2 | + | 453696 | 454013 | 3250.209054 | 3951.30854  | 4484.63725   | 5259.012869 | 4350.266944  | -0.415740497 | 0.995049536 | 0.4899061 |
| <b>tig</b>  | gi 49175990 ref NC_000913.2 | + | 454357 | 455655 | 8655.349852 | 8831.355186 | 6659.632397  | 6779.823656 | 9416.390175  | 0.18596294   | 0.39219385  | 0.1564777 |
| <b>clpP</b> | gi 49175990 ref NC_000913.2 | + | 455901 | 456524 | 3572.949058 | 3983.559432 | 4279.572023  | 3754.85839  | 3932.842792  | -0.088439468 | 0.133445328 | 0.0399341 |
| <b>clpX</b> | gi 49175990 ref NC_000913.2 | + | 456650 | 457924 | 4861.979159 | 4674.950179 | 5046.407252  | 4672.951527 | 4371.568956  | 0.033289387  | 0.03837894  | 0.0042561 |
| <b>lon</b>  | gi 49175990 ref NC_000913.2 | + | 458112 | 460466 | 3956.7132   | 3576.938325 | 3233.570472  | 2658.356593 | 2494.993599  | 0.456935142  | 1.272591899 | 0.6763572 |
| <b>hupB</b> | gi 49175990 ref NC_000913.2 | + | 460675 | 460947 | 9970.747763 | 10887.73099 | 11526.76123  | 10683.61823 | 13272.07275  | -0.19628857  | 0.350328961 | 0.1391697 |
| <b>ppiD</b> | gi 49175990 ref NC_000913.2 | + | 461139 | 463010 | 3223.958334 | 3047.914619 | 2958.592273  | 2874.679865 | 3002.846344  | 0.098908726  | 0.173169983 | 0.0547573 |
| <b>ybaV</b> | gi 49175990 ref NC_000913.2 | + | 463161 | 463532 | 68.10790984 | 68.38339723 | 50.06296603  | 82.62500347 | 68.41006174  | 0.009551313  | 0.034977695 | 0.0036811 |
| <b>fadM</b> | gi 49175990 ref NC_000913.2 | + | 463626 | 464024 | 68.93145448 | 63.60762437 | 64.85962097  | 61.67988418 | 59.51867796  | 0.108624036  | 0.150138567 | 0.0457811 |
| <b>queC</b> | gi 49175990 ref NC_000913.2 | - | 464076 | 464771 | 359.9179499 | 330.4926996 | 389.6804715  | 393.3593719 | 309.9189679  | -0.060713958 | 0.132065616 | 0.0394194 |
| <b>ybaE</b> | gi 49175990 ref NC_000913.2 | - | 464836 | 466536 | 154.9935296 | 166.2410416 | 211.9632572  | 195.129413  | 190.7879105  | -0.315455445 | 0.738250555 | 0.3324689 |
| <b>cof</b>  | gi 49175990 ref NC_000913.2 | + | 466636 | 467454 | 352.5808941 | 365.6896037 | 368.5602947  | 430.6725564 | 553.6344965  | -0.34697429  | 0.79688881  | 0.3671003 |
| <b>ybaO</b> | gi 49175990 ref NC_000913.2 | + | 467607 | 468065 | 246.8495546 | 234.5775982 | 192.5562492  | 189.5702104 | 212.9926669  | 0.28398385   | 0.6534896   | 0.2925288 |
| <b>mdlA</b> | gi 49175990 ref NC_000913.2 | + | 468095 | 469867 | 564.9439564 | 528.0602613 | 453.0345922  | 400.2726322 | 355.8467449  | 0.458028969  | 1.377259674 | 0.7455258 |
| <b>mdlB</b> | gi 49175990 ref NC_000913.2 | + | 469860 | 471641 | 541.3110917 | 456.7789887 | 378.0088895  | 343.2291    | 386.9057955  | 0.459371185  | 1.347374759 | 0.7291294 |
| <b>glnK</b> | gi 49175990 ref NC_000913.2 | + | 471822 | 472160 | 6.74937048  | 8.564410798 | 4.214512573  | 5.629821251 | 7.763681244  | 0.353894168  | 0.275518819 | 0.1029688 |
| <b>amtB</b> | gi 49175990 ref NC_000913.2 | + | 472190 | 473476 | 101.8750485 | 90.18480791 | 107.0229711  | 87.61712887 | 96.48718955  | 0.007331283  | 0.009708107 | 0         |
| <b>tesB</b> | gi 49175990 ref NC_000913.2 | - | 473525 | 474385 | 373.798045  | 417.0126935 | 369.6948775  | 319.6656266 | 333.2119958  | 0.205279888  | 0.487912757 | 0.2057658 |
| <b>ybaY</b> | gi 49175990 ref NC_000913.2 | + | 474603 | 475175 | 1164.427232 | 1296.540379 | 1046.710051  | 1069.493073 | 972.6787636  | 0.242928398  | 0.646686251 | 0.2891394 |
| <b>ybaZ</b> | gi 49175990 ref NC_000913.2 | - | 475206 | 475595 | 148.0107651 | 129.1177627 | 165.4317226  | 145.9137493 | -0.113281595 | 0.23842888   | 0.0855881   |           |
| <b>ybaA</b> | gi 49175990 ref NC_000913.2 | + | 475896 | 476249 | 198.4184603 | 220.3964181 | 145.2272969  | 167.0338325 | 181.5330787  | 0.324958226  | 0.873311863 | 0.4140035 |
| <b>ylaB</b> | gi 49175990 ref NC_000913.2 | - | 476291 | 477841 | 560.6901757 | 602.2095794 | 438.8380783  | 551.5277736 | 602.0797151  | 0.1083282    | 0.25629268  | 0.0933812 |
| <b>ylaC</b> | gi 49175990 ref NC_000913.2 | - | 478005 | 478475 | 1350.25367  | 1373.431705 | 1083.02926   | 1188.363713 | 1203.540749  | 0.226108808  | 0.554769979 | 0.2405348 |
| <b>maa</b>  | gi 49175990 ref NC_000913.2 | - | 478591 | 479142 | 1077.658488 | 1097.036815 | 720.2872053  | 1041.192849 | 941.0435262  | 0.253586679  | 0.647312634 | 0.2895228 |
| <b>hha</b>  | gi 49175990 ref NC_000913.2 | - | 479314 | 479532 | 1898.448586 | 2012.675105 | 919.2058653  | 1861.857693 | 2040.917182  | 0.241620571  | 0.51978827  | 0.2224743 |
| <b>tomB</b> | gi 49175990 ref NC_000913.2 | - | 479558 | 479932 | 4396.42114  | 4880.17964  | 2744.6855    | 5402.377091 | 5614.865849  | -0.030291942 | 0.025393512 | 0.0007012 |
| <b>acrB</b> | gi 49175990 ref NC_000913.2 | - | 480478 | 483627 | 3808.905257 | 3593.105468 | 3178.413038  | 2832.128882 | 2903.111346  | 0.330730087  | 0.839761432 | 0.3936045 |
| <b>acrA</b> | gi 49175990 ref NC_000913.2 | - | 483650 | 484843 | 1619.140055 | 1609.923961 | 1142.553212  | 1188.415657 | 1222.626085  | 0.444894714  | 1.428374092 | 0.7765289 |
| <b>acrR</b> | gi 49175990 ref NC_000913.2 | + | 484985 | 485632 | 453.1676677 | 526.2604883 | 405.3649386  | 459.6844434 | 516.8585766  | 0.058308986  | 0.166658893 | 0.0525902 |
| <b>kefA</b> | gi 49175990 ref NC_000913.2 | + | 485760 | 489122 | 1618.391276 | 1664.079339 | 1215.912186  | 1287.190934 | 1548.778942  | 0.269484157  | 0.672384904 | 0.301217  |
| <b>ybaM</b> | gi 49175990 ref NC_000913.2 | - | 489334 | 489495 | 101.7128637 | 95.90562438 | 88.02703067  | 107.4715505 | 97.60411441  | 0.0173806    | 0.023669939 | 0.0005477 |
| <b>priC</b> | gi 49175990 ref NC_000913.2 | - | 489509 | 490036 | 197.1559544 | 177.567923  | 177.9012883  | 198.2673797 | 167.2952527  | 0.061350484  | 0.076702619 | 0.018604  |
| <b>ybaN</b> | gi 49175990 ref NC_000913.2 | + | 490106 | 490483 | 234.3898336 | 259.3380049 | 130.2674364  | 134.5733557 | 144.604213   | 0.837891098  | 3.756077984 | 2.6526686 |
| <b>apt</b>  | gi 49175990 ref NC_000913.2 | + | 490636 | 491187 | 783.6864099 | 780.7392729 | 367.7682817  | 431.9830663 | 734.8505859  | 0.592073773  | 1.805018024 | 1.0564929 |
| <b>dnaX</b> | gi 49175990 ref NC_000913.2 | + | 491316 | 493247 | 1888.133947 | 1780.864859 | 1715.636545  | 1737.812711 | 1826.105267  | 0.06640821   | 0.104519466 | 0.0772229 |
| <b>ybaB</b> | gi 49175990 ref NC_000913.2 | + | 493300 | 493629 | 1201.126611 | 1298.425755 | 1017.570264  | 948.632157  | 1059.931844  | 0.298666181  | 0.838707411 | 0.3929965 |
| <b>recR</b> | gi 49175990 ref NC_000913.2 | + | 493629 | 494234 | 1124.18946  | 1199.639045 | 1087.975612  | 966.6967241 | 1228.023386  | 0.076884981  | 0.164258474 | 0.0519647 |
| <b>htpG</b> | gi 49175990 ref NC_000913.2 | + | 494344 | 496218 | 3463.09681  | 3284.419245 | 1085.980145  | 840.0733102 | 1030.778062  | 1.790711688  | 13.65613597 | 11.497932 |
| <b>adk</b>  | gi 49175990 ref NC_000913.2 | + | 496399 | 497043 | 3458.920615 | 3660.597844 | 2497.710678  | 2662.891497 | 3438.764926  | 0.294337392  | 0.781402359 | 0.3587266 |
| <b>hemH</b> | gi 49175990 ref NC_000913.2 | + | 497279 | 498241 | 626.5991574 | 618.3170687 | 546.2130063  | 443.1420641 | 540.5522371  | 0.294883854  | 0.75835783  | 0.3450565 |
| <b>aes</b>  | gi 49175990 ref NC_000913.2 | - | 498238 | 499197 | 174.1141041 | 216.6447407 | 183.7166795  | 202.9831905 | 236.4164517  | -0.125671696 | 0.135035396 | 0.0403231 |
| <b>gsk</b>  | gi 49175990 ref NC_000913.2 | + | 499349 | 500653 | 1053.126296 | 1048.585906 | 907.3427757  | 837.6217824 | 906.3129454  | 0.252544262  | 0.612564831 | 0.2710778 |
| <b>ybaL</b> | gi 49175990 ref NC_000913.2 | - | 500786 | 502462 | 1960.034494 | 1866.352422 | 1738.118621  | 1404.882306 | 1221.937627  | 0.41714075   | 1.050562783 | 0.5248671 |
| <b>fsr</b>  | gi 49175990 ref NC_000913.2 | - | 502700 | 503920 | 375.9231958 | 390.3853649 | 256.3636495  | 262.4164103 | 291.4955505  | 0.495508578  | 1.683256887 | 0.9681742 |
| <b>ushA</b> | gi 49175990 ref NC_000913.2 | + | 504138 | 505790 | 900.9108573 | 779.7243432 | 1016.697049  | 962.8711444 | 675.8066936  | -0.043125841 | 0.120740702 | 0.035482  |
| <b>ybaK</b> | gi 49175990 ref NC_000913.2 | - | 505827 | 506306 | 191.7476861 | 194.713502  | 131.5880591  | 139.0145963 | 142.4073083  | 0.483999305  | 1.463852037 | 0.7989872 |
| <b>ybaP</b> | gi 49175990 ref NC_000913.2 | - | 506510 | 507304 | 641.7265512 | 636.3657602 | 551.3658019  | 632.3358699 | 713.142301   | 0.006901303  | 0.027165368 | 0.0014853 |
| <b>ybaQ</b> | gi 49175990 ref NC_000913.2 | + | 507442 | 507783 | 317.1487059 | 339.108298  | 252.4006748  | 431.2322535 | 401.354893   | -0.171968715 | 0.240684963 | 0.0867246 |
| <b>copA</b> | gi 49175990 ref NC_000913.2 | - | 508099 | 510603 | 1013.357869 | 1013.444958 | 1768.008142  | 1734.268307 | 1382.326841  | -0.677352349 | 2.544633378 | 1.6388695 |
| <b>ybaS</b> | gi 49175990 ref NC_000913.2 | + | 510865 | 511797 | 79.43906763 | 61.65344566 | 87.08283591  | 55.05185753 | 37.50995569  | 0.294225787  | 0.347884939 | 0.1376443 |
| <b>ybaT</b> | gi 49175990 ref NC_000913.2 | + | 511800 | 513092 | 161.8954944 | 141.4649251 | 172.5505098  | 143.4412085 | 98.09968315  | 0.171012155  | 0.221734384 | 0.0773895 |
| <b>cueR</b> | gi 49175990 ref NC_000913.2 | + | 513217 | 513624 | 446.699535  | 449.2593209 | 550.3668113  | 535.8845795 | 498.1838197  | -0.234967171 | 0.565078044 | 0.2463254 |
| <b>ybbJ</b> | gi 49175990 ref NC_000913.2 | - | 513625 | 514083 | 347.580641  | 355.2350624 | 408.2715776  | 391.2419749 | 349.0557903  | -0.121545027 | 0.234874434 | 0.0834468 |
| <b>qmcA</b> | gi 49175990 ref NC_000913.2 | - | 514080 | 514997 | 416.2567861 | 438.8327796 | 520.33811661 | 551.5743167 | 554.0974411  | -0.352455646 | 0.944659431 | 0.4592492 |
| <b>ybbL</b> | gi 49175990 ref NC_000913.2 | + | 515143 | 515820 | 344.9480965 | 300.0756918 | 274.8877945  | 301.4906944 | 283.8302281  | 0.185687004  | 0.35698042  | 0.1413425 |
| <b>ybbM</b> | gi 49175990 ref NC_000913.2 | + | 515807 | 516586 | 190.540838  | 189.9568187 | 155.4159038  | 178.0629608 | 148.2232753  | 0.242960405  | 0.535270919 | 0.2300624 |
| <b>ybbN</b> | gi 49175990 ref NC_000913.2 | - | 516649 | 517503 | 1216.562244 | 1209.103213 | 1047.258311  | 866.7788518 | 839.2585676  | 0.413943785  | 1.189308913 | 0.6164224 |



|      |                             |   |        |        |             |              |             |             |             |              |             |           |
|------|-----------------------------|---|--------|--------|-------------|--------------|-------------|-------------|-------------|--------------|-------------|-----------|
| ybbO | gi 49175990 ref NC_000913.2 | - | 517564 | 518373 | 575.3864982 | 585.0875387  | 523.7329258 | 501.1323655 | 458.9553912 | 0.232497215  | 0.548453985 | 0.2367121 |
| tesA | gi 49175990 ref NC_000913.2 | - | 518363 | 518989 | 555.5855865 | 606.9665829  | 672.3203958 | 616.7028713 | 615.9086212 | -0.13540236  | 0.247996594 | 0.0904131 |
| ybbA | gi 49175990 ref NC_000913.2 | + | 518957 | 519643 | 226.3764891 | 235.5660049  | 338.4611835 | 285.854384  | 214.7207436 | -0.265696093 | 0.587577456 | 0.2587763 |
| ybbP | gi 49175990 ref NC_000913.2 | + | 519640 | 522054 | 296.0580452 | 231.6469272  | 434.8369407 | 353.0786719 | 228.3668175 | -0.30640938  | 0.768638918 | 0.3493363 |
| rhdD | gi 49175990 ref NC_000913.2 | + | 522485 | 526765 | 167.1849663 | 167.1625409  | 214.5180159 | 211.7702983 | 168.5572208 | -0.239927676 | 0.511306198 | 0.2196639 |
| ybbC | gi 49175990 ref NC_000913.2 | + | 526805 | 527173 | 5.728068396 | 4.732765067  | 10.42042582 | 10.03466172 | 5.749529971 | -0.698060856 | 0.669120994 | 0.2995062 |
| selU | gi 49175990 ref NC_000913.2 | - | 529356 | 530450 | 124.2731438 | 124.4214998  | 185.8664113 | 153.5635922 | 111.5185727 | -0.256709458 | 0.529585328 | 0.2272311 |
| allS | gi 49175990 ref NC_000913.2 | - | 530519 | 531445 | 18.41532142 | 16.12128693  | 25.62907296 | 35.6994672  | 29.2100882  | -0.795862996 | 1.782920718 | 1.0409668 |
| allA | gi 49175990 ref NC_000913.2 | + | 531675 | 532157 | 33.18037744 | 38.02186357  | 20.9425884  | 34.75368567 | 46.71071307 | 0.023638419  | 0.055924109 | 0.0102387 |
| allR | gi 49175990 ref NC_000913.2 | + | 532235 | 533050 | 1410.380931 | 1362.009218  | 1334.23972  | 1235.520419 | 1152.192876 | 0.170885399  | 0.337505212 | 0.1331079 |
| gcl  | gi 49175990 ref NC_000913.2 | + | 533140 | 534921 | 37.82108821 | 37.98917326  | 36.19957877 | 42.56417731 | 43.67509194 | -0.112331596 | 0.110241801 | 0.0301426 |
| hyi  | gi 49175990 ref NC_000913.2 | + | 534934 | 535710 | 4.877674646 | 6.66578937   | 5.264229577 | 5.571758257 | 3.438691693 | 0.26103482   | 0.174453609 | 0.0547989 |
| glxR | gi 49175990 ref NC_000913.2 | + | 535810 | 536688 | 7.102866515 | 4.7176594    | 5.443929493 | 7.781585443 | 5.651201584 | -0.055161669 | 0           | 0         |
| ybbW | gi 49175990 ref NC_000913.2 | + | 536857 | 538311 | 7.382691097 | 9.517861456  | 6.711026178 | 2.437891605 | 12.07899783 | 0.230583801  | 0.163127355 | 0.0517718 |
| allB | gi 49175990 ref NC_000913.2 | + | 538371 | 539732 | 106.7502277 | 128.2903789  | 90.0204519  | 106.7038142 | 160.8929405 | -0.060696207 | 0.014005528 | 0         |
| ybbY | gi 49175990 ref NC_000913.2 | + | 539789 | 541090 | 46.13831716 | 43.6720028   | 55.76334406 | 68.09245888 | 44.03952012 | -0.310354906 | 0.572861459 | 0.2503008 |
| glxK | gi 49175990 ref NC_000913.2 | + | 541112 | 542257 | 44.16573632 | 19.78096701  | 46.80360891 | 32.60783347 | 27.17632152 | -0.055866552 | 0.160322174 | 0.0496823 |
| yIbA | gi 49175990 ref NC_000913.2 | - | 542485 | 543270 | 133.7580015 | 132.9670644  | 98.18626103 | 77.6989788  | 117.4434164 | 0.448830612  | 1.189551217 | 0.6164224 |
| allC | gi 49175990 ref NC_000913.2 | - | 543281 | 544516 | 86.07001201 | 98.82555815  | 74.71488571 | 75.26383002 | 97.30683033 | 0.142462009  | 0.285435138 | 0.1086502 |
| allD | gi 49175990 ref NC_000913.2 | - | 545538 | 545587 | 9.586906433 | 7.572131305  | 17.04485614 | 12.44802714 | 15.68543284 | -0.773768288 | 1.232201918 | 0.644367  |
| fdRA | gi 49175990 ref NC_000913.2 | + | 545904 | 547571 | 6.774937048 | 8.564410798  | 10.76349322 | 11.24709667 | 13.3979193  | -0.634459465 | 0.632555279 | 0.2835224 |
| yIbF | gi 49175990 ref NC_000913.2 | + | 548850 | 549665 | 17.20409634 | 14.21464287  | 17.654593   | 18.07869653 | 28.88325804 | -0.442754125 | 0.582705228 | 0.256092  |
| ybcF | gi 49175990 ref NC_000913.2 | + | 549662 | 550555 | 29.02039718 | 41.87925588  | 46.56694918 | 72.19415425 | 25.23293792 | -0.477827451 | 0.604595819 | 0.2677516 |
| purK | gi 49175990 ref NC_000913.2 | + | 550750 | 551817 | 404.5670286 | 389.4014725  | 822.9647232 | 1028.167349 | 286.0745556 | -0.826483725 | 1.912493118 | 1.1344485 |
| purE | gi 49175990 ref NC_000913.2 | - | 551814 | 552323 | 474.7968459 | 522.4362662  | 753.5788526 | 1071.925413 | 424.910454  | -0.602365627 | 1.424243577 | 0.7750308 |
| lpXH | gi 49175990 ref NC_000913.2 | - | 552441 | 553163 | 703.8485443 | 773.1867574  | 577.8662727 | 612.3080165 | 783.6626411 | 0.144096143  | 0.351741507 | 0.1397671 |
| ppiB | gi 49175990 ref NC_000913.2 | - | 553166 | 553660 | 4040.450289 | 4597.14789   | 2294.977521 | 2574.321127 | 3444.26623  | 0.608036843  | 2.223312121 | 1.3730656 |
| cysS | gi 49175990 ref NC_000913.2 | + | 553834 | 555219 | 1186.183274 | 1210.065446  | 903.7467102 | 808.6596982 | 1101.145858 | 0.347743189  | 0.958927756 | 0.4666554 |
| ybcI | gi 49175990 ref NC_000913.2 | - | 555255 | 555776 | 116.3407755 | 133.0209705  | 103.966913  | 121.008474  | 121.0708385 | 0.088528506  | 0.203410452 | 0.0682219 |
| ybcJ | gi 49175990 ref NC_000913.2 | - | 555884 | 556096 | 162.4455539 | 181.4550893  | 253.4554948 | 267.8561723 | 242.4018922 | -0.580570911 | 1.815049699 | 1.0606544 |
| fold | gi 49175990 ref NC_000913.2 | - | 556098 | 556964 | 782.2396079 | 822.5564169  | 1008.093037 | 1059.27845  | 841.6046202 | -0.277210529 | 0.651618944 | 0.2917747 |
| sfmA | gi 49175990 ref NC_000913.2 | + | 557435 | 557977 | 5.270673627 | 10.50606766  | 2.862396646 | 2.343814604 | 7.670168311 | 0.792941724  | 0.764211603 | 0.3470783 |
| sfmC | gi 49175990 ref NC_000913.2 | + | 558197 | 558889 | 22.45412698 | 16.08744381  | 13.93343263 | 20.21246776 | 27.76892067 | -0.083108444 | 0.089665566 | 0.023818  |
| sfmD | gi 49175990 ref NC_000913.2 | + | 558920 | 561523 | 60.83647977 | 53.14492797  | 60.39850108 | 69.58954425 | 88.29379065 | -0.346738073 | 0.731185928 | 0.3283671 |
| sfmH | gi 49175990 ref NC_000913.2 | + | 561559 | 562542 | 10.82456162 | 10.823290243 | 7.119893421 | 9.079897181 | 17.6500808  | -0.735940592 | 0.862350852 | 0.4074687 |
| sfmF | gi 49175990 ref NC_000913.2 | + | 562553 | 563068 | 7.721867774 | 14.31605169  | 16.46491044 | 15.92223306 | 33.20485016 | -1.049253364 | 1.69846805  | 0.9795332 |
| fimZ | gi 49175990 ref NC_000913.2 | - | 563071 | 563703 | 15.17583578 | 14.23350505  | 8.294029391 | 14.42164466 | 10.14509647 | 0.418844593  | 0.485503781 | 0.2045802 |
| intD | gi 49175990 ref NC_000913.2 | - | 564038 | 565201 | 827.5874688 | 891.9044154  | 519.1508956 | 799.2103558 | 905.8563132 | 0.180193088  | 0.441692081 | 0.180966  |
| insE | gi 49175990 ref NC_000913.2 | + | 566065 | 566364 | 97.79880337 | 96.87307477  | 88.92544628 | 89.6904239  | 88.63523014 | 0.129287992  | 0.222514086 | 0.0773895 |
| insF | gi 49175990 ref NC_000913.2 | + | 566361 | 567227 | 124.9836006 | 121.5610831  | 185.8959685 | 210.5768894 | 175.1568694 | -0.625761686 | 2.022058293 | 1.2142331 |
| emrE | gi 49175990 ref NC_000913.2 | + | 567538 | 567870 | 136.2412785 | 172.005915   | 110.4138698 | 94.51401339 | 146.498845  | 0.361169823  | 0.978113325 | 0.4781148 |
| ybcK | gi 49175990 ref NC_000913.2 | + | 568125 | 569651 | 8.668448052 | 21.02114091  | 13.59901257 | 21.11330252 | 14.66803302 | -0.237380675 | 0.073242466 | 0.017532  |
| ybcL | gi 49175990 ref NC_000913.2 | + | 570116 | 570667 | 25.86875594 | 38.08004471  | 30.90013434 | 31.51983429 | 43.4942424  | -0.189771998 | 0.159368343 | 0.049678  |
| ybcM | gi 49175990 ref NC_000913.2 | + | 570677 | 571474 | 42.67830854 | 64.70853008  | 35.53742376 | 55.95312534 | 62.5347554  | -0.002381071 | 0.083860123 | 0.021045  |
| yIcH | gi 49175990 ref NC_000913.2 | + | 571591 | 571692 | 5.911004058 | 2.810376305  | 6.753483596 | 7.840855767 | 7.844757545 | -0.707164885 | 0.663425995 | 0.2976012 |
| ybcN | gi 49175990 ref NC_000913.2 | + | 571689 | 572144 | 13.8219353  | 14.2468433   | 25.95068631 | 11.52589527 | 23.43686814 | -0.516010445 | 0.632599917 | 0.2835224 |
| ninE | gi 49175990 ref NC_000913.2 | + | 572144 | 572314 | 6.009951485 | 1.851346523  | 15.13808403 | 6.83971568  | 5.765559799 | -1.10240571  | 1.360855913 | 0.7377132 |
| ybcO | gi 49175990 ref NC_000913.2 | + | 572307 | 572597 | 4.035956479 | 0.913377903  | 4.174993429 | 5.611118416 | 6.67924723  | -1.029475546 | 0.668397946 | 0.2992823 |
| rusA | gi 49175990 ref NC_000913.2 | + | 572594 | 572956 | 4.659780709 | 9.553297585  | 4.325707659 | 7.82104854  | 8.8907475   | -0.055256112 | 0           | 0         |
| quuD | gi 49175990 ref NC_000913.2 | + | 573179 | 573562 | 3.682884278 | 14.37306559  | 13.72857653 | 21.18279364 | 19.03996759 | -1.111205422 | 1.595648882 | 0.8952905 |
| insH | gi 49175990 ref NC_000913.2 | - | 573960 | 574976 | 947.684988  | 961.2119702  | 851.0864103 | 967.5181834 | 1034.047187 | -0.004617894 | 0.011197326 | 0         |
| essD | gi 49175990 ref NC_000913.2 | + | 576621 | 576836 | 25.00312373 | 17.98378259  | 17.96288493 | 19.29163499 | 39.85415162 | -0.241459968 | 0.266781429 | 0.0981516 |
| rrrD | gi 49175990 ref NC_000913.2 | + | 576836 | 577333 | 43.90914815 | 49.41905458  | 35.20908674 | 36.12445704 | 63.40941095 | 0.029162286  | 0.04562916  | 0.0069576 |
| rzpD | gi 49175990 ref NC_000913.2 | + | 577330 | 577791 | 50.2595493  | 55.11190101  | 56.33792217 | 30.67825492 | 52.55939865 | 0.181778464  | 0.265688875 | 0.0973125 |
| rzoD | gi 49175990 ref NC_000913.2 | + | 577550 | 577732 | 29.30702974 | 23.69751822  | 41.51887171 | 20.51213409 | 31.4046685  | -0.191036441 | 0.263147373 | 0.0969652 |
| borD | gi 49175990 ref NC_000913.2 | - | 577823 | 578116 | 259.3326108 | 315.4197435  | 70.01789106 | 62.17257762 | 143.7218132 | 1.599488573  | 8.050693166 | 6.4320048 |
| ybcW | gi 49175990 ref NC_000913.2 | + | 579103 | 579309 | 37.34735403 | 48.50749223  | 47.63792017 | 87.07547022 | 73.95479089 | -0.744089241 | 1.710571857 | 0.9882747 |

|      |                             |   |        |        |             |             |             |             |             |              |             |           |
|------|-----------------------------|---|--------|--------|-------------|-------------|-------------|-------------|-------------|--------------|-------------|-----------|
| ylcl | gi 49175990 ref NC_000913.2 | - | 579474 | 579668 | 14.35768423 | 7.527321521 | 21.22319581 | 19.13641924 | 22.38671282 | -0.871506889 | 1.666276724 | 0.9545388 |
| nohD | gi 49175990 ref NC_000913.2 | + | 580057 | 580602 | 15.03982314 | 16.15301711 | 14.03961172 | 23.50917942 | 28.91483827 | -0.528612986 | 0.662913793 | 0.2976012 |
| appY | gi 49175990 ref NC_000913.2 | + | 582904 | 583653 | 16.14887507 | 10.38841495 | 9.45363495  | 17.599023   | 4.730743658 | 0.356151431  | 0.297245104 | 0.1146545 |
| ompT | gi 49175990 ref NC_000913.2 | - | 583903 | 584856 | 77.66510564 | 75.01924565 | 26.74088815 | 77.78825657 | 50.52802694 | 0.535280932  | 1.165716875 | 0.5987715 |
| envY | gi 49175990 ref NC_000913.2 | - | 585370 | 586131 | 56.09438107 | 56.98910294 | 52.70119377 | 77.21177406 | 79.44535933 | -0.32017967  | 0.58505965  | 0.2574398 |
| ybcH | gi 49175990 ref NC_000913.2 | - | 586314 | 587204 | 95.65069089 | 81.62504525 | 89.19204463 | 85.38453162 | 110.7811734 | -0.086053621 | 0.154843333 | 0.0487535 |
| nfrA | gi 49175990 ref NC_000913.2 | - | 587205 | 590177 | 328.3395206 | 303.901729  | 395.5727365 | 391.3789816 | 438.4477686 | -0.361271712 | 1.016236293 | 0.507037  |
| nfrB | gi 49175990 ref NC_000913.2 | - | 590164 | 592401 | 313.3050025 | 280.1418505 | 354.491627  | 340.9995662 | 412.5533799 | -0.303382773 | 0.798745681 | 0.3680957 |
| cusS | gi 49175990 ref NC_000913.2 | - | 592551 | 593993 | 204.2632816 | 214.6740975 | 147.0329616 | 199.4435846 | 213.9737462 | 0.143312683  | 0.304442848 | 0.1175135 |
| cusR | gi 49175990 ref NC_000913.2 | - | 593983 | 594666 | 164.0244292 | 164.3138685 | 128.8322055 | 126.7695872 | 140.1127959 | 0.313976005  | 0.755266478 | 0.3439111 |
| cusC | gi 49175990 ref NC_000913.2 | + | 594823 | 596196 | 12.09090608 | 20.02055765 | 21.36183858 | 18.10541868 | 27.84251904 | -0.528612986 | 0.636198962 | 0.284622  |
| cusF | gi 49175990 ref NC_000913.2 | + | 596354 | 596686 | 11.32137706 | 11.39392591 | 5.838774583 | 6.894481066 | 18.66851447 | 0.095143885  | 0.087078628 | 0.0224427 |
| cusB | gi 49175990 ref NC_000913.2 | + | 596702 | 597925 | 16.87180919 | 19.01157824 | 15.037012   | 19.07646243 | 23.39625129 | -0.115542491 | 0.040899664 | 0.0047848 |
| cusA | gi 49175990 ref NC_000913.2 | + | 597937 | 601080 | 85.3807825  | 77.8490317  | 104.1395851 | 81.99622712 | 84.24367893 | -0.120884535 | 0.23441618  | 0.0831396 |
| pheP | gi 49175990 ref NC_000913.2 | + | 601182 | 602558 | 647.6640691 | 717.1514533 | 512.6016917 | 532.6467524 | 623.4219907 | 0.187590861  | 0.761767229 | 0.3466446 |
| mscM | gi 49175990 ref NC_000913.2 | - | 602639 | 603886 | 673.6401967 | 722.8355477 | 660.2452856 | 566.346693  | 605.7644626 | 0.279265372  | 0.440482044 | 0.1808157 |
| nfsB | gi 49175990 ref NC_000913.2 | - | 603994 | 604647 | 1266.937917 | 1297.449992 | 1095.19326  | 1194.07734  | 1370.480091 | 0.060589779  | 0.13150709  | 0.0394194 |
| ybdF | gi 49175990 ref NC_000913.2 | - | 604741 | 605109 | 165.6256773 | 183.3511084 | 147.7262445 | 168.1074648 | 169.3031048 | 0.090313937  | 0.192314706 | 0.062551  |
| ybdJ | gi 49175990 ref NC_000913.2 | - | 605174 | 605422 | 182.9538478 | 183.3101986 | 162.1102039 | 170.4144335 | 176.0485385 | 0.108252541  | 0.20337445  | 0.0682219 |
| ybdK | gi 49175990 ref NC_000913.2 | - | 605488 | 606606 | 465.3634023 | 507.2348274 | 446.9766645 | 523.1344487 | 335.8834755 | 0.049610834  | 0.313171137 | 0.1222592 |
| hokE | gi 49175990 ref NC_000913.2 | + | 607059 | 607211 | 25.00312373 | 17.98378259 | 23.78154439 | 19.19008865 | 24.60744627 | -0.03079859  | 0.048454683 | 0.0080312 |
| insL | gi 49175990 ref NC_000913.2 | + | 607288 | 608400 | 839.4935291 | 927.0591068 | 667.8712208 | 691.8708771 | 828.6593311 | 0.255436903  | 0.708836374 | 0.3175779 |
| entD | gi 49175990 ref NC_000913.2 | - | 608682 | 609302 | 43.51749826 | 30.30368685 | 45.68939416 | 29.37032916 | 34.83462891 | 0.064103709  | 0           | 0         |
| fepA | gi 49175990 ref NC_000913.2 | - | 609477 | 611717 | 150.6654082 | 156.7304131 | 133.747399  | 155.6826547 | 140.0298261 | 0.280064928  | 0.61956589  | 0.2761184 |
| fes  | gi 49175990 ref NC_000913.2 | + | 612038 | 613162 | 48.64455909 | 46.52394017 | 45.65448048 | 22.81066442 | 40.26118017 | 0.412495661  | 0.725446748 | 0.3248854 |
| ybdZ | gi 49175990 ref NC_000913.2 | + | 613165 | 613383 | 16.1977049  | 19.01816564 | 6.477028017 | 2.373562201 | 6.658766866 | 1.748117487  | 3.656606648 | 2.5693596 |
| entF | gi 49175990 ref NC_000913.2 | + | 613380 | 617261 | 360.5453175 | 331.4429964 | 160.8919396 | 162.6804309 | 192.7142541 | 1.014271879  | 5.099050509 | 3.815472  |
| fepE | gi 49175990 ref NC_000913.2 | + | 617477 | 618610 | 29.33412951 | 35.18165437 | 13.09689695 | 8.00449147  | 13.3807851  | 1.470539115  | 4.35163255  | 3.1665998 |
| fepC | gi 49175990 ref NC_000913.2 | - | 618607 | 619422 | 151.8468465 | 162.4406244 | 29.21241732 | 31.32809992 | 27.00471782 | 2.417144394  | 20.5638924  | 17.90822  |
| fepD | gi 49175990 ref NC_000913.2 | - | 619419 | 620411 | 139.6916078 | 158.6651701 | 59.97547019 | 57.33885476 | 74.91448059 | 1.197651468  | 6.505261388 | 5.0476353 |
| fepG | gi 49175990 ref NC_000913.2 | - | 620408 | 621412 | 336.1496636 | 351.4459326 | 105.4857651 | 120.0112523 | 142.1793824 | 1.471817485  | 9.725861113 | 7.9420215 |
| entS | gi 49175990 ref NC_000913.2 | + | 621523 | 622773 | 171.945901  | 152.8687516 | 73.05312154 | 63.01612669 | 86.12705163 | 1.146579782  | 5.737552442 | 4.378058  |
| fepB | gi 49175990 ref NC_000913.2 | - | 622777 | 623733 | 147.0641781 | 143.4074093 | 54.75301543 | 55.06376362 | 70.42981408 | 1.270198639  | 7.062281939 | 5.5387274 |
| entC | gi 49175990 ref NC_000913.2 | + | 624108 | 625283 | 144.8403414 | 158.6506973 | 144.446689  | 96.94852506 | 175.6177722 | 0.117461557  | 0.206886596 | 0.070021  |
| entE | gi 49175990 ref NC_000913.2 | + | 625293 | 626990 | 136.250164  | 137.7226444 | 115.6956403 | 69.91601649 | 95.32411316 | 0.562828551  | 1.577826308 | 0.8827837 |
| entB | gi 49175990 ref NC_000913.2 | + | 626917 | 627774 | 118.3018736 | 104.4293074 | 34.08324584 | 25.90809552 | 28.09346631 | 1.945308281  | 12.40925234 | 10.422587 |
| entA | gi 49175990 ref NC_000913.2 | + | 627774 | 628520 | 174.2844045 | 132.8649831 | 100.3626724 | 82.00024743 | 88.65581274 | 0.807389387  | 2.898036739 | 1.9331534 |
| entH | gi 49175990 ref NC_000913.2 | + | 628523 | 628936 | 83.20360951 | 65.45549544 | 38.11649349 | 26.02766217 | 36.9196167  | 1.176124147  | 4.483474889 | 3.2818004 |
| cstA | gi 49175990 ref NC_000913.2 | + | 629117 | 631222 | 891.1382662 | 842.4525096 | 1665.750331 | 1229.987852 | 933.8782281 | -0.526714345 | 1.627560081 | 0.9229017 |
| ybdD | gi 49175990 ref NC_000913.2 | + | 631405 | 631602 | 82.35231969 | 92.16698602 | 117.7879176 | 112.0956614 | 101.1083902 | -0.346910129 | 0.787706875 | 0.3620573 |
| ybdH | gi 49175990 ref NC_000913.2 | - | 631612 | 632700 | 221.2413814 | 192.7507497 | 283.5721833 | 269.0587265 | 244.7088152 | -0.337066693 | 0.916727137 | 0.4427423 |
| ybdL | gi 49175990 ref NC_000913.2 | + | 632809 | 633969 | 74.97249587 | 100.7809511 | 119.3448063 | 108.8836342 | 123.3072928 | -0.449727974 | 1.037773346 | 0.5202286 |
| ybdM | gi 49175990 ref NC_000913.2 | - | 633970 | 634599 | 46.2398343  | 57.04631221 | 35.39045833 | 43.85632689 | 65.70918882 | 0.055761287  | 0.109691643 | 0.0297206 |
| ybdN | gi 49175990 ref NC_000913.2 | - | 634572 | 635792 | 36.84284518 | 31.30100719 | 18.15582467 | 33.48589039 | 34.58495895 | 0.241581112  | 0.339203829 | 0.1335511 |
| ybdO | gi 49175990 ref NC_000913.2 | - | 635939 | 636841 | 22.128163   | 20.88070977 | 15.93162492 | 15.7088762  | 15.71686    | 0.452559725  | 0.641974305 | 0.286746  |
| dsbG | gi 49175990 ref NC_000913.2 | - | 637050 | 637796 | 161.4544593 | 164.3202423 | 104.1097703 | 235.8995413 | 189.4454041 | -0.147156871 | 0.152455224 | 0.0474193 |
| ahpC | gi 49175990 ref NC_000913.2 | + | 638168 | 638731 | 10513.22668 | 12094.01772 | 9383.151006 | 10284.26177 | 11118.43799 | 0.11234922   | 0.26759705  | 0.0984343 |
| ahpF | gi 49175990 ref NC_000913.2 | + | 638976 | 640541 | 2948.113439 | 2863.664169 | 3454.851367 | 3408.33343  | 3561.457041 | -0.25421014  | 0.607946583 | 0.2691543 |
| uspG | gi 49175990 ref NC_000913.2 | - | 640662 | 641090 | 1983.830619 | 2385.062907 | 3519.871963 | 3755.704403 | 3364.210329 | -0.726461188 | 2.691502946 | 1.7646356 |
| ybdR | gi 49175990 ref NC_000913.2 | + | 641311 | 642549 | 158.5277309 | 149.0919046 | 172.4280104 | 178.7922238 | 159.4144474 | -0.135061643 | 0.261594166 | 0.096505  |
| rnk  | gi 49175990 ref NC_000913.2 | - | 642780 | 643190 | 422.2037881 | 410.3015758 | 385.6372994 | 364.7950792 | 612.8013272 | -0.133789484 | 0.210896021 | 0.0721266 |
| rna  | gi 49175990 ref NC_000913.2 | - | 643420 | 644226 | 518.3364821 | 569.9267593 | 556.2326066 | 527.1690693 | 677.1874526 | -0.126294489 | 0.195812491 | 0.0641759 |
| citT | gi 49175990 ref NC_000913.2 | - | 644340 | 645803 | 78.37961853 | 73.10812294 | 121.0252002 | 124.5087442 | 138.9517363 | -0.752956324 | 2.769609517 | 1.8262131 |
| citG | gi 49175990 ref NC_000913.2 | - | 645854 | 646732 | 8.616611319 | 21.98082158 | 13.3460333  | 10.24639625 | 17.77632113 | 0.062194732  | 0.139721297 | 0.0418239 |
| citX | gi 49175990 ref NC_000913.2 | - | 646707 | 647258 | 20.72484343 | 21.8509464  | 14.90824558 | 10.3696884  | 27.61758938 | 0.258191069  | 0.305633033 | 0.1183085 |
| citF | gi 49175990 ref NC_000913.2 | - | 647262 | 648794 | 4.35070241  | 14.36280526 | 21.4277313  | 23.54242778 | 24.63529884 | -1.405188583 | 2.646690763 | 1.7251962 |
| citE | gi 49175990 ref NC_000913.2 | - | 648805 | 649713 | 24.99413988 | 9.365188223 | 25.60138719 | 33.51928286 | 30.28295298 | -0.71599491  | 1.591033964 | 0.891744  |

|             |                             |   |        |        |             |             |             |             |             |              |             |           |
|-------------|-----------------------------|---|--------|--------|-------------|-------------|-------------|-------------|-------------|--------------|-------------|-----------|
| <b>citD</b> | gi 49175990 ref NC_000913.2 | - | 649710 | 650006 | 2.548739145 | 1.886824264 | 5.673914474 | 13.22828817 | 6.82459586  | -1.886466075 | 2.115075579 | 1.2876338 |
| <b>citC</b> | gi 49175990 ref NC_000913.2 | - | 650021 | 651079 | 61.08185681 | 47.41361328 | 49.36313041 | 59.27192154 | 50.55245364 | 0.056884219  | 0.043294636 | 0.0060195 |
| <b>dpiB</b> | gi 49175990 ref NC_000913.2 | + | 651458 | 653116 | 166.0211986 | 160.5003549 | 201.0211409 | 162.7421296 | 171.7071803 | -0.114852022 | 0.222885838 | 0.0773895 |
| <b>dpiA</b> | gi 49175990 ref NC_000913.2 | + | 653085 | 653765 | 287.5000235 | 306.8135422 | 806.9587445 | 638.1075545 | 626.1426329 | -1.211826981 | 6.748819216 | 5.2660096 |
| <b>dcuC</b> | gi 49175990 ref NC_000913.2 | - | 653806 | 655191 | 2032.793615 | 2191.24784  | 8098.242914 | 6153.02202  | 5686.412014 | -1.647449295 | 10.25394475 | 8.4221816 |
| <b>pagP</b> | gi 49175990 ref NC_000913.2 | + | 655780 | 656340 | 90.93397471 | 87.3643912  | 97.32231894 | 126.3981617 | 99.97109078 | -0.276396618 | 0.569591147 | 0.2490427 |
| <b>cspE</b> | gi 49175990 ref NC_000913.2 | + | 656515 | 656724 | 65150.52416 | 72662.54727 | 68358.97581 | 51817.81699 | 117433.1269 | -0.227452705 | 0.307350276 | 0.1188375 |
| <b>crcB</b> | gi 49175990 ref NC_000913.2 | - | 656778 | 657161 | 176.5695654 | 181.4208769 | 231.0378504 | 246.5896824 | 236.7082165 | -0.417035589 | 1.109394385 | 0.5635634 |
| <b>tatE</b> | gi 49175990 ref NC_000913.2 | + | 658170 | 658373 | 607.4719735 | 635.4047641 | 762.9326819 | 713.2159658 | 827.6721303 | -0.312072672 | 0.797606651 | 0.3675312 |
| <b>lipA</b> | gi 49175990 ref NC_000913.2 | - | 658474 | 659439 | 2233.019279 | 2274.803866 | 1542.371273 | 1659.409334 | 2016.509201 | 0.362404096  | 0.969211581 | 0.4722371 |
| <b>ybeF</b> | gi 49175990 ref NC_000913.2 | - | 659648 | 660601 | 108.5070696 | 108.2734395 | 74.36986711 | 119.8060678 | 133.1082896 | -0.030551506 | 0           | 0         |
| <b>lipB</b> | gi 49175990 ref NC_000913.2 | - | 660860 | 661501 | 486.3442138 | 505.313162  | 381.9720721 | 384.491519  | 350.1167861 | 0.410391095  | 1.27320175  | 0.676546  |
| <b>ybeD</b> | gi 49175990 ref NC_000913.2 | - | 661602 | 661865 | 508.2653951 | 554.7262596 | 506.761948  | 441.9913288 | 552.7914947 | 0.07535517   | 0.163592599 | 0.0518508 |
| <b>dacA</b> | gi 49175990 ref NC_000913.2 | - | 661975 | 663186 | 1123.213663 | 1103.668716 | 640.3320663 | 717.623568  | 875.6773927 | 0.572437356  | 2.064319638 | 1.2481956 |
| <b>rlpA</b> | gi 49175990 ref NC_000913.2 | - | 663325 | 664413 | 857.1494859 | 949.8562923 | 837.4022574 | 828.6372016 | 937.5952146 | 0.040714706  | 0.10589825  | 0.0283572 |
| <b>mrdB</b> | gi 49175990 ref NC_000913.2 | - | 664424 | 665536 | 838.3366365 | 897.60019   | 855.7714211 | 802.8900098 | 911.8327722 | 0.008855858  | 0.033442304 | 0.0030156 |
| <b>mrDA</b> | gi 49175990 ref NC_000913.2 | - | 665539 | 667440 | 1238.0694   | 1211.945443 | 858.6713112 | 799.6253899 | 1030.535387 | 0.450636967  | 1.400207081 | 0.767065  |
| <b>rlmH</b> | gi 49175990 ref NC_000913.2 | - | 667471 | 667938 | 683.4728218 | 658.1978557 | 433.315169  | 484.4170291 | 585.1770073 | 0.416395041  | 1.236652998 | 0.6466853 |
| <b>ybeB</b> | gi 49175990 ref NC_000913.2 | - | 667942 | 668259 | 810.860392  | 961.2863238 | 547.173262  | 549.5616511 | 709.6597406 | 0.526046285  | 1.975207571 | 1.1824631 |
| <b>cobC</b> | gi 49175990 ref NC_000913.2 | - | 668519 | 669130 | 256.1522934 | 256.4454146 | 245.8800382 | 251.2584656 | 300.3621958 | -0.058134567 | 0.082133412 | 0.0207313 |
| <b>nadD</b> | gi 49175990 ref NC_000913.2 | - | 669154 | 669795 | 399.6627787 | 446.4577337 | 330.7014886 | 364.298775  | 356.6846424 | 0.251537659  | 0.676885663 | 0.3033725 |
| <b>hoiA</b> | gi 49175990 ref NC_000913.2 | - | 669797 | 670828 | 1017.728608 | 1031.497708 | 1007.500188 | 1060.686148 | 1220.193034 | -0.105404459 | 0.177020845 | 0.0559818 |
| <b>lptE</b> | gi 49175990 ref NC_000913.2 | - | 670828 | 671409 | 1052.586192 | 1021.029038 | 1040.022596 | 969.8987153 | 1033.084775 | 0.037959229  | 0.056471047 | 0.0106306 |
| <b>leuS</b> | gi 49175990 ref NC_000913.2 | - | 671424 | 674006 | 3866.859371 | 3748.887743 | 3951.391936 | 3344.452286 | 3043.543344 | 0.15981644   | 0.285466637 | 0.1086502 |
| <b>ybeL</b> | gi 49175990 ref NC_000913.2 | + | 674241 | 674723 | 1838.55531  | 1920.536175 | 2618.836238 | 2893.374926 | 2169.790895 | -0.450657248 | 1.200515166 | 0.6212005 |
| <b>ybeQ</b> | gi 49175990 ref NC_000913.2 | - | 674793 | 675770 | 189.8282324 | 240.3989419 | 257.6795399 | 275.7748767 | 279.258234  | -0.367890565 | 0.817467436 | 0.3785126 |
| <b>ybeR</b> | gi 49175990 ref NC_000913.2 | + | 675934 | 676641 | 9.586906433 | 7.572131305 | 6.711023022 | 3.527066021 | 11.01801375 | 0.293995649  | 0.164757226 | 0.0519869 |
| <b>djIB</b> | gi 49175990 ref NC_000913.2 | + | 676638 | 678065 | 44.38595577 | 38.90354355 | 26.28981608 | 43.66846737 | 53.48686772 | 0.010447876  | 0.007138433 | 0         |
| <b>ybeT</b> | gi 49175990 ref NC_000913.2 | - | 678075 | 678629 | 9.340701599 | 21.01254315 | 6.012134511 | 14.51370487 | 17.73300498 | 0.146475599  | 0.257923945 | 0.0943277 |
| <b>ybeU</b> | gi 49175990 ref NC_000913.2 | + | 678731 | 679438 | 16.22829426 | 9.428945479 | 9.056157859 | 4.608373327 | 7.826562203 | 0.894285684  | 1.019154729 | 0.509266  |
| <b>djIC</b> | gi 49175990 ref NC_000913.2 | + | 679435 | 680886 | 73.9150405  | 70.26519749 | 52.08093098 | 54.99471434 | 63.78067077 | 0.340982943  | 0.72448126  | 0.3248854 |
| <b>hscC</b> | gi 49175990 ref NC_000913.2 | - | 680946 | 682616 | 97.65688437 | 79.71055637 | 136.7726838 | 147.8887248 | 133.5732166 | -0.628265944 | 2.17840755  | 1.3334161 |
| <b>rihA</b> | gi 49175990 ref NC_000913.2 | - | 682700 | 683635 | 1424.830686 | 1400.960052 | 3755.173674 | 3200.970787 | 3051.32389  | -1.227050991 | 6.609319127 | 5.1392838 |
| <b>gltL</b> | gi 49175990 ref NC_000913.2 | - | 683753 | 684478 | 198.7235723 | 199.4577378 | 294.5614016 | 242.1443245 | 178.8478839 | -0.24374266  | 0.517215127 | 0.2218965 |
| <b>gltK</b> | gi 49175990 ref NC_000913.2 | - | 684478 | 685152 | 145.1484416 | 113.8825853 | 196.7839637 | 178.1460712 | 127.2025826 | -0.32640336  | 0.814412222 | 0.3771007 |
| <b>gltJ</b> | gi 49175990 ref NC_000913.2 | - | 685152 | 685892 | 76.47285905 | 93.1463511  | 115.69548   | 93.07164845 | 72.16211785 | -0.151014609 | 0.231647267 | 0.0820292 |
| <b>gltI</b> | gi 49175990 ref NC_000913.2 | - | 686062 | 686970 | 309.8705905 | 368.6005995 | 443.5314949 | 566.8726998 | 413.0853325 | -0.512943478 | 1.437218282 | 0.7820287 |
| <b>insH</b> | gi 49175990 ref NC_000913.2 | - | 687220 | 688236 | 875.6390917 | 917.5360286 | 845.6047996 | 955.1244609 | 943.3171404 | -0.041234694 | 0.043342397 | 0.0060195 |
| <b>lnt</b>  | gi 49175990 ref NC_000913.2 | - | 688566 | 690104 | 1384.947333 | 1413.325367 | 960.6861702 | 957.5159299 | 1017.331882 | 0.511569596  | 1.845249701 | 1.08414   |
| <b>ybeX</b> | gi 49175990 ref NC_000913.2 | - | 690129 | 691007 | 1524.31994  | 1590.951015 | 1003.240276 | 1003.511711 | 1110.368227 | 0.575301737  | 2.165677954 | 1.3280853 |
| <b>ybeY</b> | gi 49175990 ref NC_000913.2 | - | 691097 | 691564 | 709.8916416 | 583.0907771 | 507.9651287 | 462.0512432 | 504.7312815 | 0.425186369  | 1.209550035 | 0.6262121 |
| <b>ybeZ</b> | gi 49175990 ref NC_000913.2 | - | 691561 | 692601 | 1356.226099 | 1268.911274 | 1227.709517 | 1003.591681 | 1006.358059 | 0.302565122  | 0.720337202 | 0.3221157 |
| <b>miaB</b> | gi 49175990 ref NC_000913.2 | - | 692754 | 694178 | 1364.597858 | 1457.038475 | 936.7194246 | 880.2522844 | 1004.926441 | 0.575804307  | 2.237726131 | 1.3821601 |
| <b>ubiF</b> | gi 49175990 ref NC_000913.2 | + | 694324 | 695499 | 1006.640429 | 944.078523  | 1289.959587 | 1146.880931 | 916.8651858 | -0.175721762 | 0.406364767 | 0.1653288 |
| <b>asnB</b> | gi 49175990 ref NC_000913.2 | - | 696736 | 698400 | 140.7638936 | 136.7573803 | 113.461477  | 133.4080433 | 148.9634746 | 0.066960416  | 0.122838246 | 0.0362877 |
| <b>nagD</b> | gi 49175990 ref NC_000913.2 | - | 698797 | 699549 | 988.6407532 | 1020.108458 | 902.120214  | 867.8333215 | 901.8555065 | 0.169997945  | 0.376524243 | 0.1484466 |
| <b>nagC</b> | gi 49175990 ref NC_000913.2 | - | 699597 | 700817 | 1348.120165 | 1227.108142 | 1551.928701 | 1517.958101 | 1329.477312 | -0.169674718 | 0.393002539 | 0.1567356 |
| <b>nagA</b> | gi 49175990 ref NC_000913.2 | - | 700826 | 701974 | 1292.660298 | 1153.963641 | 1656.649397 | 1750.923295 | 1226.523806 | -0.314755439 | 0.818269924 | 0.378885  |
| <b>nagB</b> | gi 49175990 ref NC_000913.2 | - | 702034 | 702834 | 905.8166996 | 980.238997  | 1630.391115 | 1780.097712 | 1344.189626 | -0.758020169 | 2.939474242 | 1.9660477 |
| <b>nagE</b> | gi 49175990 ref NC_000913.2 | + | 703167 | 705113 | 3549.56478  | 3347.104053 | 8509.714135 | 7676.309031 | 5255.927153 | -1.028059716 | 4.419421647 | 3.2261477 |
| <b>glnS</b> | gi 49175990 ref NC_000913.2 | + | 705316 | 706980 | 2761.086673 | 2877.945484 | 2914.730943 | 2475.806187 | 3206.763784 | -0.028092156 | 0.03353039  | 0.0030156 |
| <b>chiP</b> | gi 49175990 ref NC_000913.2 | + | 707557 | 708963 | 148.9946584 | 143.4022775 | 207.1968633 | 255.8846165 | 413.0189357 | -1.013943034 | 3.501721783 | 2.4371145 |
| <b>chiQ</b> | gi 49175990 ref NC_000913.2 | + | 709013 | 709339 | 78.84467176 | 78.82997762 | 78.88481922 | 90.83274117 | 104.0972326 | -0.219520403 | 0.392214401 | 0.1564777 |
| <b>fur</b>  | gi 49175990 ref NC_000913.2 | - | 709423 | 709869 | 2287.001263 | 2526.543455 | 1816.959801 | 1943.053746 | 2335.104668 | 0.221813843  | 0.538709664 | 0.2317944 |
| <b>uof</b>  | gi 49175990 ref NC_000913.2 | - | 709862 | 709948 | 1518.541528 | 1630.856915 | 1201.468261 | 1372.29233  | 1545.464499 | 0.17777175   | 0.430386254 | 0.1762871 |
| <b>fldA</b> | gi 49175990 ref NC_000913.2 | - | 710158 | 710688 | 1679.056765 | 1683.063342 | 1130.927025 | 1234.399269 | 1352.608235 | 0.432762951  | 1.362400374 | 0.7388097 |
| <b>ybfE</b> | gi 49175990 ref NC_000913.2 | - | 710828 | 711121 | 485.3096921 | 569.9574231 | 306.2665727 | 435.8259804 | 402.5946559 | 0.430152832  | 1.418493978 | 0.7709489 |

|             |                             |   |        |        |              |             |             |             |             |              |             |           |
|-------------|-----------------------------|---|--------|--------|--------------|-------------|-------------|-------------|-------------|--------------|-------------|-----------|
| <b>ybfF</b> | gi 49175990 ref NC_000913.2 | - | 711261 | 712025 | 255.1804416  | 284.9875009 | 262.7222576 | 244.5607304 | 281.4186227 | 0.023904322  | 0.062861336 | 0.0135708 |
| <b>seqA</b> | gi 49175990 ref NC_000913.2 | + | 712210 | 712755 | 1201.190514  | 1274.671547 | 1074.917802 | 1087.585406 | 1196.741071 | 0.133186092  | 0.306297832 | 0.1186729 |
| <b>pgm</b>  | gi 49175990 ref NC_000913.2 | + | 712781 | 714421 | 2220.23107   | 1985.999031 | 2071.917507 | 1895.910048 | 1833.043465 | 0.142764199  | 0.228120773 | 0.0798549 |
| <b>ybfP</b> | gi 49175990 ref NC_000913.2 | + | 714635 | 715129 | 73.66371324  | 77.89896385 | 40.70324175 | 50.56457924 | 72.46016079 | 0.450640561  | 1.081890766 | 0.5467928 |
| <b>potE</b> | gi 49175990 ref NC_000913.2 | - | 716169 | 717488 | 89.15920545  | 81.64933499 | 50.95068928 | 56.42693093 | 67.12295472 | 0.531398799  | 1.454706416 | 0.7956435 |
| <b>speF</b> | gi 49175990 ref NC_000913.2 | - | 717485 | 719683 | 52.46674891  | 49.36837705 | 52.98117422 | 51.57545374 | 49.41477621 | -0.001572709 | 0           | 0         |
| <b>kdpE</b> | gi 49175990 ref NC_000913.2 | - | 720279 | 720956 | 116.2259124  | 86.32476119 | 74.07041581 | 98.67935288 | 124.0827035 | 0.053273458  | 0.04598707  | 0.0070823 |
| <b>kdpD</b> | gi 49175990 ref NC_000913.2 | - | 720953 | 723637 | 381.0634527  | 384.6737527 | 314.1619529 | 299.3485196 | 281.6810369 | 0.362250151  | 1.027039327 | 0.5140349 |
| <b>kdpC</b> | gi 49175990 ref NC_000913.2 | - | 723630 | 724202 | 86.33239112  | 89.28976235 | 53.3534926  | 60.47753177 | 58.31861573 | 0.605071437  | 1.888521329 | 1.1168261 |
| <b>kdpB</b> | gi 49175990 ref NC_000913.2 | - | 724211 | 726259 | 52.81296426  | 57.00722586 | 26.02408504 | 43.50963606 | 39.18404128 | 0.573495859  | 1.43544991  | 0.7811622 |
| <b>kdpA</b> | gi 49175990 ref NC_000913.2 | - | 726282 | 727955 | 29.10612987  | 39.96600277 | 13.75944955 | 24.42441106 | 16.89794694 | 0.861741031  | 2.138615736 | 1.3067919 |
| <b>ybfA</b> | gi 49175990 ref NC_000913.2 | + | 728357 | 728563 | 2680.638798  | 2553.066299 | 4035.393823 | 2632.826366 | 2770.966974 | -0.236624393 | 0.564704083 | 0.2463254 |
| <b>rhcC</b> | gi 49175990 ref NC_000913.2 | + | 728806 | 732999 | 414.8195355  | 380.8321699 | 546.9159724 | 670.075393  | 505.05158   | -0.520546945 | 1.72759749  | 1.0019118 |
| <b>ybfB</b> | gi 49175990 ref NC_000913.2 | + | 732999 | 733325 | 7.617072802  | 6.632957969 | 5.443923956 | 9.905619496 | 3.501142631 | 0.189189924  | 0.041016278 | 0.0047848 |
| <b>ybfD</b> | gi 49175990 ref NC_000913.2 | + | 737315 | 738076 | 6.600669722  | 2.803618985 | 5.638296435 | 8.945870902 | 10.01782282 | -0.736636036 | 0.662349573 | 0.2976012 |
| <b>ybgA</b> | gi 49175990 ref NC_000913.2 | + | 738224 | 738733 | 485.56158778 | 528.1298154 | 539.4474644 | 491.0815658 | 450.0155968 | 0.033746684  | 0.068254712 | 0.0162038 |
| <b>phr</b>  | gi 49175990 ref NC_000913.2 | + | 738730 | 740148 | 783.1680402  | 755.0790801 | 955.3177014 | 828.4347007 | 596.1852504 | -0.023776168 | 0.067378672 | 0.0160372 |
| <b>dtpD</b> | gi 49175990 ref NC_000913.2 | - | 740298 | 741779 | 120.316198   | 128.2447338 | 122.2141021 | 127.7893092 | 126.7496498 | -0.024688784 | 0.019151684 | 0         |
| <b>ybgJ</b> | gi 49175990 ref NC_000913.2 | + | 742050 | 742793 | 821.0679285  | 782.61827   | 968.2893699 | 795.9591215 | 559.226449  | 0.076117203  | 0.08317985  | 0.0209983 |
| <b>ybgJ</b> | gi 49175990 ref NC_000913.2 | + | 742816 | 743472 | 455.4850196  | 384.5945108 | 533.7683574 | 394.6217233 | 239.6983865 | 0.160576352  | 0.167444064 | 0.0527964 |
| <b>ybgK</b> | gi 49175990 ref NC_000913.2 | + | 743466 | 744398 | 827.5778775  | 744.5991977 | 929.8575291 | 761.2248301 | 551.3421913 | 0.106332925  | 0.125886938 | 0.037291  |
| <b>ybgL</b> | gi 49175990 ref NC_000913.2 | + | 744388 | 745122 | 548.2051224  | 469.1326319 | 458.1082315 | 411.3732861 | 312.2805414 | 0.402659368  | 0.977482651 | 0.4778212 |
| <b>nei</b>  | gi 49175990 ref NC_000913.2 | + | 745158 | 745949 | 483.8471829  | 498.6607467 | 460.0061461 | 378.09544   | 455.3108096 | 0.189214592  | 0.415077307 | 0.1695263 |
| <b>abrB</b> | gi 49175990 ref NC_000913.2 | - | 745946 | 746992 | 632.1552734  | 646.8282436 | 1852.616981 | 1468.93974  | 1585.091301 | -1.347500013 | 8.355843678 | 6.7049707 |
| <b>ybgO</b> | gi 49175990 ref NC_000913.2 | - | 747144 | 748205 | 48.48017517  | 50.3464428  | 51.97200748 | 54.94971505 | 58.26078175 | -0.162637175 | 0.253751803 | 0.0923968 |
| <b>ybgP</b> | gi 49175990 ref NC_000913.2 | - | 748202 | 748930 | 28.05083489  | 34.2351598  | 28.27755257 | 28.18941488 | 42.32184945 | -0.108163044 | 0.082690701 | 0.0209983 |
| <b>ybgQ</b> | gi 49175990 ref NC_000913.2 | - | 748945 | 751392 | 60.64537491  | 57.9201357  | 57.40399643 | 66.08402664 | 65.02155657 | -0.083199578 | 0.113151379 | 0.031768  |
| <b>ybgD</b> | gi 49175990 ref NC_000913.2 | - | 751452 | 752018 | 5.728068396  | 4.732765067 | 7.182864074 | 12.33521784 | 16.62463069 | -1.188202359 | 1.482058847 | 0.8119038 |
| <b>glfA</b> | gi 49175990 ref NC_000913.2 | - | 752408 | 753691 | 2219.062813  | 1933.74714  | 2682.097761 | 2149.164847 | 1406.247635 | 0.040414001  | 0.001046655 | 0         |
| <b>sdhC</b> | gi 49175990 ref NC_000913.2 | + | 754400 | 754789 | 405.9550594  | 376.0871671 | 332.3952532 | 271.5140033 | 292.8243076 | 0.406420612  | 1.116771719 | 0.5675368 |
| <b>sdhD</b> | gi 49175990 ref NC_000913.2 | + | 754783 | 755130 | 207.5202672  | 210.8606424 | 186.6918318 | 192.6282104 | 140.5770348 | 0.274957879  | 0.596950812 | 0.2646456 |
| <b>sdhA</b> | gi 49175990 ref NC_000913.2 | + | 755130 | 756896 | 1115.494086  | 1143.580958 | 956.748036  | 701.0097428 | 758.4323653 | 0.498863229  | 1.531480164 | 0.850008  |
| <b>sdhB</b> | gi 49175990 ref NC_000913.2 | + | 756912 | 757628 | 816.0708565  | 766.4646421 | 574.2387105 | 506.9383352 | 569.7721017 | 0.536091813  | 1.880693271 | 1.110885  |
| <b>sucA</b> | gi 49175990 ref NC_000913.2 | + | 757929 | 760730 | 2405.560632  | 2266.217981 | 2211.807593 | 1827.521175 | 1555.107752 | 0.348022035  | 0.773922414 | 0.353532  |
| <b>sucB</b> | gi 49175990 ref NC_000913.2 | + | 760745 | 761962 | 1752.767756  | 1816.052923 | 1690.08322  | 1270.426188 | 1140.062785 | 0.397856866  | 0.995987238 | 0.4899061 |
| <b>sucC</b> | gi 49175990 ref NC_000913.2 | + | 762237 | 763403 | 1837.399097  | 1559.50933  | 1774.369948 | 1247.989531 | 979.8641143 | 0.397414047  | 0.783230287 | 0.3599897 |
| <b>sucD</b> | gi 49175990 ref NC_000913.2 | + | 763403 | 764272 | 1504.867663  | 1522.549609 | 1470.408471 | 1212.08311  | 1150.013026 | 0.254805402  | 0.570919971 | 0.2491116 |
| <b>mngR</b> | gi 49175990 ref NC_000913.2 | - | 764376 | 765098 | 103.2831149  | 110.1978058 | 73.66759415 | 110.566695  | 78.69680978 | 0.265639137  | 0.586406397 | 0.2584339 |
| <b>mngA</b> | gi 49175990 ref NC_000913.2 | + | 765207 | 767183 | 10.79953241  | 19.07647211 | 17.08646035 | 11.38208469 | 17.851258   | -0.092894911 | 0           | 0         |
| <b>mngB</b> | gi 49175990 ref NC_000913.2 | + | 767201 | 769834 | 169.0611135  | 170.0143085 | 159.7932765 | 184.9419091 | 193.9142852 | -0.091045923 | 0.127209014 | 0.0373086 |
| <b>cydA</b> | gi 49175990 ref NC_000913.2 | + | 770681 | 772249 | 19707.71232  | 18175.55397 | 24914.93728 | 20115.75387 | 20145.40232 | -0.17455481  | 0.381043914 | 0.1506163 |
| <b>cydB</b> | gi 49175990 ref NC_000913.2 | + | 772265 | 773404 | 1385.79202   | 12809.11883 | 19131.3454  | 14807.1158  | 13599.11946 | -0.221471711 | 0.505014666 | 0.2150742 |
| <b>ybgT</b> | gi 49175990 ref NC_000913.2 | + | 773419 | 773532 | 1839.284529  | 1868.283015 | 2712.690779 | 2355.684169 | 2491.407821 | -0.439145166 | 1.235836467 | 0.6462833 |
| <b>ybgE</b> | gi 49175990 ref NC_000913.2 | + | 773532 | 773825 | 1096.211492  | 1245.260133 | 1738.774935 | 1529.339316 | 1504.380092 | -0.453414058 | 1.303089182 | 0.6962042 |
| <b>ybgC</b> | gi 49175990 ref NC_000913.2 | + | 773975 | 774379 | 876.3629906  | 893.7779155 | 741.6117116 | 670.6476922 | 792.8965998 | 0.265872701  | 0.694627173 | 0.3103556 |
| <b>tolQ</b> | gi 49175990 ref NC_000913.2 | + | 774376 | 775068 | 748.493594   | 715.1828535 | 569.8290483 | 655.8219139 | 691.9337548 | 0.193505343  | 0.446046596 | 0.1840474 |
| <b>tolR</b> | gi 49175990 ref NC_000913.2 | + | 775072 | 775500 | 289.9446493  | 317.2726523 | 234.2665736 | 284.6793955 | 294.8452157 | 0.140212929  | 0.330527244 | 0.1302079 |
| <b>tolA</b> | gi 49175990 ref NC_000913.2 | + | 775565 | 776830 | 1011.632772  | 964.032024  | 845.504267  | 904.7572539 | 944.3925629 | 0.139601964  | 0.280024685 | 0.1056361 |
| <b>tolB</b> | gi 49175990 ref NC_000913.2 | + | 776963 | 778255 | 3941.24711   | 3897.067901 | 3324.794523 | 2994.813788 | 3652.140803 | 0.239343639  | 0.550715094 | 0.2383424 |
| <b>pal</b>  | gi 49175990 ref NC_000913.2 | + | 778290 | 778811 | 3738.288509  | 3472.471992 | 2567.366717 | 2587.641367 | 2710.040371 | 0.468681923  | 1.480804884 | 0.8114182 |
| <b>ybgF</b> | gi 49175990 ref NC_000913.2 | + | 778821 | 779612 | 1508.255063  | 1428.486799 | 1079.503712 | 881.4977163 | 1046.486855 | 0.564337146  | 1.977863029 | 1.1835264 |
| <b>nadA</b> | gi 49175990 ref NC_000913.2 | + | 781308 | 782351 | 157.8661692  | 150.0458654 | 146.0365427 | 154.6455286 | 143.6481229 | 0.061773605  | 0.090914185 | 0.023835  |
| <b>pnuC</b> | gi 49175990 ref NC_000913.2 | + | 782389 | 783108 | 302.2929096  | 295.377104  | 305.927078  | 303.6437813 | 223.6238364 | 0.11637565   | 0.18882611  | 0.0611353 |
| <b>zitB</b> | gi 49175990 ref NC_000913.2 | - | 783105 | 784046 | 333.71766    | 339.085633  | 338.4841972 | 357.5915575 | 345.5146815 | -0.049481426 | 0.070019182 | 0.0170551 |
| <b>ybgS</b> | gi 49175990 ref NC_000913.2 | - | 784160 | 784540 | 341.7451874  | 366.6545883 | 146.2521884 | 278.5780149 | 223.1721735 | 0.680185347  | 2.388591988 | 1.508745  |
| <b>aroG</b> | gi 49175990 ref NC_000913.2 | + | 784856 | 785908 | 1749.663882  | 1786.601726 | 1966.034261 | 1929.471024 | 1822.928754 | -0.108972178 | 0.190001679 | 0.0611353 |
| <b>gpmA</b> | gi 49175990 ref NC_000913.2 | - | 786066 | 786818 | 5552.180818  | 5511.749769 | 4068.597768 | 3866.781927 | 3400.217212 | 0.557011295  | 1.851900926 | 1.0889418 |

|       |                             |   |        |        |             |             |             |              |             |              |             |           |
|-------|-----------------------------|---|--------|--------|-------------|-------------|-------------|--------------|-------------|--------------|-------------|-----------|
| galM  | gi 49175990 ref NC_000913.2 | - | 787020 | 788060 | 2884.972877 | 2834.225459 | 8209.796584 | 7029.51527   | 5245.761751 | -1.237247026 | 6.135719654 | 4.7244623 |
| galK  | gi 49175990 ref NC_000913.2 | - | 788054 | 789202 | 6274.321842 | 5771.011535 | 20179.29754 | 16960.59922  | 12042.42182 | -1.414450481 | 7.283653318 | 5.7456209 |
| galT  | gi 49175990 ref NC_000913.2 | - | 789206 | 790252 | 5618.089329 | 5153.632654 | 18763.97672 | 16098.47678  | 12542.58844 | -1.525626235 | 8.802461243 | 7.0956368 |
| galE  | gi 49175990 ref NC_000913.2 | - | 790262 | 791278 | 8714.450313 | 7919.479855 | 25952.08904 | 22059.60112  | 16948.78407 | -1.35103734  | 6.962998039 | 5.4429887 |
| modF  | gi 49175990 ref NC_000913.2 | - | 791539 | 793011 | 483.802844  | 505.3155706 | 558.7371806 | 438.5132122  | 407.4758973 | 0.087472218  | 0.14422278  | 0.0432419 |
| modE  | gi 49175990 ref NC_000913.2 | - | 793079 | 793867 | 466.7806647 | 401.6992286 | 517.6805814 | 416.0598659  | 379.4380193 | 0.023077982  | 0.013195423 | 0         |
| ybhT  | gi 49175990 ref NC_000913.2 | + | 793996 | 794145 | 3062.852115 | 3669.207119 | 3018.303017 | 3870.187933  | 4660.304404 | -0.236676932 | 0.370076068 | 0.1454249 |
| modA  | gi 49175990 ref NC_000913.2 | + | 794312 | 795085 | 531.1620409 | 549.0021854 | 847.3218038 | 768.0438899  | 741.601565  | -0.539190796 | 1.902150119 | 1.1260201 |
| modB  | gi 49175990 ref NC_000913.2 | + | 795085 | 795774 | 296.847658  | 328.6757708 | 636.8732784 | 502.3740007  | 434.4872145 | -0.743593727 | 2.806892358 | 1.8540338 |
| modC  | gi 49175990 ref NC_000913.2 | + | 795777 | 796835 | 280.9294898 | 218.3475784 | 513.0395964 | 410.2769914  | 268.7556033 | -0.614879298 | 1.978562502 | 1.1835613 |
| ybhA  | gi 49175990 ref NC_000913.2 | - | 796836 | 797654 | 360.121754  | 377.0916736 | 421.4639248 | 379.019722   | 371.4086597 | -0.084045003 | 0.146722594 | 0.0441955 |
| pgl   | gi 49175990 ref NC_000913.2 | + | 797809 | 798804 | 1461.2963   | 1492.16005  | 1645.362017 | 1458.517409  | 1088.58093  | 0.09033469   | 0.139108508 | 0.0415146 |
| ybhD  | gi 49175990 ref NC_000913.2 | - | 798845 | 799798 | 98.95381784 | 79.70602002 | 100.8279493 | 99.7975936   | 99.8494517  | -0.137678119 | 0.301201766 | 0.11561   |
| ybhI  | gi 49175990 ref NC_000913.2 | + | 801110 | 802543 | 16.26050681 | 18.05881399 | 16.28285084 | 16.93151321  | 25.56613387 | -0.20693518  | 0.192706914 | 0.062551  |
| ybhJ  | gi 49175990 ref NC_000913.2 | + | 802726 | 804987 | 107.2371926 | 107.3247219 | 107.7748253 | 115.4779549  | 121.0610705 | -0.10110185  | 0.161101672 | 0.0501866 |
| ybhC  | gi 49175990 ref NC_000913.2 | - | 805221 | 806504 | 683.6514342 | 624.9305558 | 484.0970603 | 426.2417507  | 497.9257062 | 0.494057776  | 1.586038414 | 0.8888773 |
| ybhB  | gi 49175990 ref NC_000913.2 | - | 806656 | 807132 | 527.1011133 | 591.7822531 | 405.1948559 | 446.2214404  | 484.4056963 | 0.306204537  | 0.910421674 | 0.4394412 |
| bioA  | gi 49175990 ref NC_000913.2 | - | 807191 | 808480 | 115.0707706 | 104.4394922 | 97.13503827 | 95.43126571  | 116.4440437 | 0.100287451  | 0.155737999 | 0.0487535 |
| bioB  | gi 49175990 ref NC_000913.2 | + | 808567 | 809607 | 43.24975607 | 49.42326121 | 45.98550569 | 33.8199116   | 40.38038374 | 0.204166284  | 0.315509448 | 0.1235647 |
| bioF  | gi 49175990 ref NC_000913.2 | + | 809604 | 810758 | 57.36892988 | 57.93713878 | 46.6869353  | 48.26362831  | 54.84492943 | 0.202854128  | 0.301201766 | 0.1454249 |
| bioC  | gi 49175990 ref NC_000913.2 | + | 810745 | 811500 | 42.49964802 | 37.00298486 | 24.98860387 | 10.49126804  | 32.15463766 | 0.836279994  | 1.767783998 | 1.0317712 |
| bioD  | gi 49175990 ref NC_000913.2 | + | 811493 | 812170 | 32.61014861 | 36.11323746 | 25.06192665 | 21.38160681  | 23.55674728 | 0.551284083  | 1.115185513 | 0.5667635 |
| uvrB  | gi 49175990 ref NC_000913.2 | + | 812749 | 814770 | 1603.342987 | 1604.226089 | 1353.918138 | 1239.95636   | 1063.700373 | 0.4040197    | 1.137190184 | 0.5807384 |
| ybhK  | gi 49175990 ref NC_000913.2 | - | 814962 | 815870 | 703.5349224 | 703.808642  | 565.5580842 | 504.868657   | 732.0006075 | 0.22355164   | 0.515241058 | 0.2209121 |
| moaA  | gi 49175990 ref NC_000913.2 | + | 816267 | 817256 | 1716.371366 | 1679.252485 | 1900.824318 | 1814.449886  | 3014.389635 | -0.410478466 | 0.915448357 | 0.4423179 |
| moaB  | gi 49175990 ref NC_000913.2 | + | 817278 | 817790 | 914.2643402 | 921.3168023 | 692.6120625 | 459.266497   | 938.0845998 | 0.396220994  | 0.967716443 | 0.4717454 |
| moaC  | gi 49175990 ref NC_000913.2 | + | 817793 | 818278 | 691.9434933 | 616.3704984 | 539.4919456 | 335.893894   | 615.2992405 | 0.419445116  | 1.014497956 | 0.5056429 |
| moaD  | gi 49175990 ref NC_000913.2 | + | 818271 | 818516 | 273.0932343 | 230.7289779 | 200.8585989 | 134.9547343  | 184.9667243 | 0.570966274  | 1.57385775  | 0.8814488 |
| moaE  | gi 49175990 ref NC_000913.2 | + | 818518 | 818970 | 460.6628859 | 452.0976507 | 392.0631167 | 232.7526278  | 429.145425  | 0.38873356   | 0.899794428 | 0.4325823 |
| ybhL  | gi 49175990 ref NC_000913.2 | + | 819107 | 819811 | 1599.331361 | 1706.83884  | 1991.36129  | 2072.879982  | 1836.441409 | -0.259148466 | 0.546295315 | 0.235234  |
| ybhM  | gi 49175990 ref NC_000913.2 | + | 820016 | 820729 | 38.11679779 | 32.2492255  | 28.43134494 | 41.30061588  | 35.88764339 | 0.006694103  | 0           | 0         |
| ybhN  | gi 49175990 ref NC_000913.2 | - | 820765 | 821721 | 153.5127953 | 177.6701185 | 111.5642276 | 133.1225125  | 96.73517143 | 0.520224481  | 1.701383766 | 0.9810243 |
| ybhO  | gi 49175990 ref NC_000913.2 | - | 821721 | 822962 | 257.0227062 | 238.3664671 | 211.3630571 | 184.9405402  | 142.851274  | 0.485517773  | 1.283685645 | 0.6832221 |
| ybhP  | gi 49175990 ref NC_000913.2 | - | 822959 | 823720 | 208.1885472 | 208.9558648 | 166.5947894 | 149.1200279  | 131.4675889 | 0.492403533  | 1.445455749 | 0.7878493 |
| ybhQ  | gi 49175990 ref NC_000913.2 | + | 823853 | 824263 | 1051.844356 | 1053.337683 | 2107.464592 | 2639.995522  | 2258.137574 | -1.157286584 | 5.668233707 | 4.3183907 |
| ybhR  | gi 49175990 ref NC_000913.2 | - | 824225 | 825331 | 510.9886234 | 525.2543181 | 732.8245456 | 858.6146988  | 784.1245496 | -0.621354587 | 2.31044751  | 1.4424722 |
| ybhS  | gi 49175990 ref NC_000913.2 | - | 825342 | 826475 | 484.9262846 | 528.1304209 | 502.116354  | 485.2748956  | 352.6744151 | 0.178725475  | 0.383664873 | 0.1528746 |
| ybhF  | gi 49175990 ref NC_000913.2 | - | 826468 | 828204 | 1193.677724 | 1245.219168 | 1255.340004 | 1155.72387   | 798.1154691 | 0.19631385   | 0.388908993 | 0.1545033 |
| ybhG  | gi 49175990 ref NC_000913.2 | - | 828197 | 829195 | 1030.132458 | 926.962691  | 1342.710054 | 1222.956094  | 782.5029528 | -0.159006862 | 0.352977043 | 0.1402157 |
| ybiH  | gi 49175990 ref NC_000913.2 | - | 829195 | 829866 | 551.8136997 | 600.3159147 | 531.7275798 | 649.1357457  | 751.1912565 | -0.185905945 | 0.314337616 | 0.1228902 |
| rhlE  | gi 49175990 ref NC_000913.2 | + | 830095 | 831459 | 1458.235807 | 1449.405608 | 1302.861554 | 1402.380978  | 1198.201906 | 0.16104085   | 0.338853419 | 0.1335511 |
| ybiA  | gi 49175990 ref NC_000913.2 | - | 831691 | 832173 | 115.5477156 | 111.1091262 | 150.6552946 | 191.5475361  | 183.8816736 | -0.634123856 | 2.012043882 | 1.2076303 |
| dinG  | gi 49175990 ref NC_000913.2 | + | 832293 | 834443 | 1161.875026 | 1087.499023 | 1579.681729 | 1515.723467  | 1311.560207 | -0.369978152 | 1.06499592  | 0.5336653 |
| ybiB  | gi 49175990 ref NC_000913.2 | + | 834471 | 835433 | 668.4772569 | 616.3862477 | 1104.192354 | 1001.075629  | 753.1520773 | -0.544877684 | 1.8961778   | 1.121954  |
| ybiC  | gi 49175990 ref NC_000913.2 | + | 835574 | 836659 | 562.2374306 | 554.6796129 | 505.1021295 | 519.9991352  | 392.9743916 | 0.247634197  | 0.568292666 | 0.2488581 |
| ybiJ  | gi 49175990 ref NC_000913.2 | - | 836888 | 837148 | 114.0324688 | 152.0789493 | 93.23889131 | 109.7342963  | 99.86367526 | 0.355903682  | 1.007301742 | 0.4987907 |
| ybiI  | gi 49175990 ref NC_000913.2 | - | 837413 | 837679 | 77.04675511 | 96.00430597 | 108.2698673 | 140.01122732 | 141.190239  | -0.623132376 | 1.732444403 | 0.5056234 |
| ybiX  | gi 49175990 ref NC_000913.2 | - | 837753 | 838430 | 55.01339225 | 51.26489403 | 45.01593701 | 38.27059479  | 47.01916915 | 0.301561835  | 0.543599714 | 0.2336282 |
| fiu   | gi 49175990 ref NC_000913.2 | - | 838472 | 840754 | 82.19759719 | 97.88849775 | 73.31227621 | 80.70686955  | 84.04740878 | 0.155950397  | 0.334135895 | 0.1317706 |
| mcbaA | gi 49175990 ref NC_000913.2 | - | 841019 | 841279 | 60.39640874 | 64.60400675 | 61.81363471 | 52.72243418  | 46.18076588 | 0.224335718  | 0.407452893 | 0.1661972 |
| rlmF  | gi 49175990 ref NC_000913.2 | + | 841555 | 842481 | 236.7584777 | 275.5070763 | 213.2567488 | 172.9200555  | 211.8915387 | 0.345925384  | 0.92896401  | 0.4516294 |
| ybiO  | gi 49175990 ref NC_000913.2 | - | 842478 | 844703 | 366.4802448 | 378.0347535 | 304.5593015 | 256.8832671  | 262.5854805 | 0.442295302  | 1.340613187 | 0.7245757 |
| glnQ  | gi 49175990 ref NC_000913.2 | - | 844964 | 845686 | 362.0567101 | 374.2364109 | 317.2947581 | 286.163295   | 379.9334681 | 0.160622358  | 0.349756611 | 0.1391697 |
| glnP  | gi 49175990 ref NC_000913.2 | - | 845683 | 846342 | 306.0367095 | 288.7120568 | 268.3927314 | 239.1523125  | 355.0937981 | 0.053967804  | 0.082764356 | 0.0209983 |
| glnH  | gi 49175990 ref NC_000913.2 | - | 846481 | 847227 | 778.6711007 | 768.3872671 | 646.3870111 | 650.3521007  | 725.5989441 | 0.197272263  | 0.46263719  | 0.1939831 |
| dps   | gi 49175990 ref NC_000913.2 | - | 847631 | 848134 | 7412.88857  | 7603.251157 | 12345.79584 | 17343.45496  | 11334.40369 | -0.876301885 | 3.186598747 | 2.1650512 |
| rhtA  | gi 49175990 ref NC_000913.2 | - | 848433 | 849320 | 164.5820829 | 169.0731134 | 167.468014  | 159.4002286  | 203.8646525 | -0.091675958 | 0.137945072 | 0.0415146 |

|              |                             |   |        |        |             |             |             |             |             |              |             |           |
|--------------|-----------------------------|---|--------|--------|-------------|-------------|-------------|-------------|-------------|--------------|-------------|-----------|
| <b>ompX</b>  | gi 49175990 ref NC_000913.2 | + | 849673 | 850188 | 17344.52988 | 19514.8859  | 11249.89639 | 11764.29768 | 14195.20477 | 0.54687225   | 1.833624734 | 1.0743999 |
| <b>ybiP</b>  | gi 49175990 ref NC_000913.2 | - | 850237 | 851820 | 326.6812826 | 341.9482857 | 261.1552284 | 322.9244346 | 395.5231348 | 0.012966076  | 0.055200292 | 0.0101886 |
| <b>ylil</b>  | gi 49175990 ref NC_000913.2 | + | 851894 | 852163 | 1790.035943 | 1834.093968 | 1861.763429 | 2153.510855 | 1898.069988 | -0.129169969 | 0.216173671 | 0.0749019 |
| <b>mntR</b>  | gi 49175990 ref NC_000913.2 | + | 852406 | 852873 | 287.9277332 | 327.7382258 | 328.9456267 | 306.189142  | 333.096873  | -0.084495988 | 0.114998299 | 0.032456  |
| <b>ybiR</b>  | gi 49175990 ref NC_000913.2 | + | 852870 | 853988 | 165.0775301 | 177.6404606 | 228.8079748 | 168.49117   | 206.3569755 | -0.231172527 | 0.466106087 | 0.1954443 |
| <b>ybiS</b>  | gi 49175990 ref NC_000913.2 | - | 854047 | 854967 | 876.7668358 | 955.5472312 | 666.3071679 | 683.9506162 | 741.3329125 | 0.378365895  | 1.226521647 | 0.6406707 |
| <b>ybiT</b>  | gi 49175990 ref NC_000913.2 | + | 855186 | 856778 | 1700.202533 | 1555.745228 | 1387.553309 | 1166.288978 | 1462.53495  | 0.297705057  | 0.685476787 | 0.3075159 |
| <b>ybiU</b>  | gi 49175990 ref NC_000913.2 | - | 857019 | 858284 | 247.8465269 | 256.4596275 | 155.2436661 | 144.7592771 | 164.7838112 | 0.698110907  | 2.677191383 | 1.7539132 |
| <b>ybiV</b>  | gi 49175990 ref NC_000913.2 | - | 858436 | 859251 | 263.791817  | 316.3633696 | 163.5139589 | 179.331522  | 178.3152798 | 0.710351739  | 2.946764614 | 1.9705614 |
| <b>ybiW</b>  | gi 49175990 ref NC_000913.2 | - | 859397 | 861829 | 151.18668   | 163.394569  | 377.2735561 | 300.6493007 | 306.380926  | -1.059056874 | 5.108261432 | 3.8226295 |
| <b>ybiY</b>  | gi 49175990 ref NC_000913.2 | - | 861835 | 862734 | 34.50730662 | 38.01220964 | 24.24695805 | 71.91990211 | 76.36018091 | -1.142264034 | 4.569537845 | 3.3540751 |
| <b>fsaA</b>  | gi 49175990 ref NC_000913.2 | + | 862865 | 863527 | 124.7103239 | 106.3159152 | 376.3882613 | 271.4521333 | 220.3429012 | -1.28171196  | 6.136332676 | 4.7244623 |
| <b>moeB</b>  | gi 49175990 ref NC_000913.2 | - | 863603 | 864352 | 510.4712288 | 507.192299  | 551.245823  | 418.5200799 | 511.4410036 | 0.053279802  | 0.07645745  | 0.1084999 |
| <b>moeA</b>  | gi 49175990 ref NC_000913.2 | - | 864352 | 865587 | 780.3147025 | 828.2597233 | 829.7649727 | 614.7533163 | 761.5863054 | 0.130656228  | 0.264201225 | 0.0969652 |
| <b>iaaA</b>  | gi 49175990 ref NC_000913.2 | + | 865791 | 866756 | 480.3289869 | 456.8325003 | 477.6401536 | 343.3317465 | 350.2074979 | 0.28719574   | 0.615705233 | 0.2731972 |
| <b>gsiA</b>  | gi 49175990 ref NC_000913.2 | + | 866743 | 868614 | 824.9902301 | 756.0053507 | 825.1564698 | 646.991447  | 543.3420398 | 0.264498071  | 0.532195835 | 0.2284919 |
| <b>gsiB</b>  | gi 49175990 ref NC_000913.2 | + | 868634 | 870172 | 834.460323  | 763.6031748 | 913.6814605 | 831.9476948 | 805.5335028 | -0.07153898  | 0.166112847 | 0.0525902 |
| <b>gsiC</b>  | gi 49175990 ref NC_000913.2 | + | 870190 | 871110 | 256.1640615 | 255.493985  | 248.5254487 | 228.571264  | 160.8800683 | 0.279208835  | 0.573216223 | 0.2504314 |
| <b>gsiD</b>  | gi 49175990 ref NC_000913.2 | + | 871113 | 872024 | 185.9776509 | 194.7261889 | 252.5730326 | 213.0752984 | 189.8385838 | -0.193434716 | 0.385508731 | 0.1538105 |
| <b>ylilE</b> | gi 49175990 ref NC_000913.2 | + | 872202 | 874550 | 80.31456752 | 55.92368008 | 38.33755003 | 62.63453659 | 38.09366116 | 0.949942968  | 3.023013355 | 2.0321357 |
| <b>ylilF</b> | gi 49175990 ref NC_000913.2 | + | 874558 | 875886 | 158.2201075 | 132.9020612 | 106.0286025 | 168.9490784 | 151.3266319 | 0.039528012  | 0.048744248 | 0.0081378 |
| <b>rimO</b>  | gi 49175990 ref NC_000913.2 | - | 875933 | 877258 | 388.9116064 | 360.8910246 | 243.038863  | 211.1147746 | 305.8059517 | 0.572881623  | 1.890067072 | 1.1177411 |
| <b>bssR</b>  | gi 49175990 ref NC_000913.2 | + | 877471 | 877854 | 676.9903272 | 685.7658616 | 2173.706458 | 2034.75446  | 1568.61085  | -1.490487238 | 9.328333412 | 7.5934803 |
| <b>ylil</b>  | gi 49175990 ref NC_000913.2 | + | 877965 | 879080 | 239.4305288 | 216.5106303 | 277.5747442 | 310.4301238 | 286.0903292 | -0.343672098 | 0.926115178 | 0.4497397 |
| <b>gstB</b>  | gi 49175990 ref NC_000913.2 | - | 879077 | 879703 | 378.6251826 | 372.3144631 | 524.3954158 | 460.7401891 | 360.4981166 | -0.241321414 | 0.57366421  | 0.2506552 |
| <b>dacC</b>  | gi 49175990 ref NC_000913.2 | + | 879950 | 881152 | 1426.69038  | 1416.161562 | 1336.347583 | 1182.753517 | 933.7105625 | 0.318048849  | 0.755891146 | 0.3439111 |
| <b>deoR</b>  | gi 49175990 ref NC_000913.2 | - | 881199 | 881957 | 560.8705171 | 570.8407669 | 479.0408726 | 449.7437044 | 524.7970209 | 0.220589786  | 0.53648911  | 0.2308498 |
| <b>ybjG</b>  | gi 49175990 ref NC_000913.2 | - | 882015 | 882611 | 666.074839  | 713.3365    | 439.2540723 | 379.2703381 | 517.8882803 | 0.619864902  | 2.373494932 | 1.4988665 |
| <b>mdfA</b>  | gi 49175990 ref NC_000913.2 | + | 882896 | 884128 | 298.5290005 | 289.6752233 | 207.0782598 | 197.4516789 | 226.4458659 | 0.486717312  | 1.529089795 | 0.8485943 |
| <b>ybjH</b>  | gi 49175990 ref NC_000913.2 | - | 884169 | 884453 | 129.1544441 | 109.1618097 | 98.40893127 | 86.60185678 | 124.162817  | 0.227769019  | 0.404412269 | 0.1640847 |
| <b>ybjI</b>  | gi 49175990 ref NC_000913.2 | - | 884539 | 885354 | 200.7160025 | 240.3751548 | 167.1247454 | 139.3177582 | 188.1854006 | 0.396285534  | 1.113720124 | 0.5667635 |
| <b>ybjJ</b>  | gi 49175990 ref NC_000913.2 | - | 885354 | 886562 | 229.4030441 | 248.8814034 | 204.0892594 | 173.9920377 | 206.2912967 | 0.288421564  | 0.703775973 | 0.3152758 |
| <b>ybjK</b>  | gi 49175990 ref NC_000913.2 | + | 886646 | 887182 | 187.8809373 | 158.5466004 | 212.5692419 | 186.4438163 | 272.1421285 | -0.350156554 | 0.862369855 | 0.4074687 |
| <b>ybjL</b>  | gi 49175990 ref NC_000913.2 | - | 887357 | 889042 | 719.4330474 | 694.291635  | 543.2482992 | 600.9557071 | 668.3237135 | 0.223886246  | 0.539143091 | 0.2319924 |
| <b>ybjM</b>  | gi 49175990 ref NC_000913.2 | + | 889312 | 889689 | 150.4762106 | 167.2051442 | 183.7085629 | 198.5370524 | 239.7441168 | -0.405962564 | 0.949665263 | 0.4629489 |
| <b>grxA</b>  | gi 49175990 ref NC_000913.2 | - | 889719 | 889976 | 109.0365007 | 113.0367072 | 79.38404829 | 120.8451425 | 116.4941289 | 0.0516062    | 0.106090566 | 0.0283572 |
| <b>ybjC</b>  | gi 49175990 ref NC_000913.2 | + | 890136 | 890423 | 640.1060922 | 585.9890871 | 469.238713  | 431.6720455 | 407.3408404 | 0.509513609  | 1.683658776 | 0.9681742 |
| <b>nfsA</b>  | gi 49175990 ref NC_000913.2 | + | 890407 | 891129 | 845.5031922 | 706.5732477 | 536.1166969 | 455.1439117 | 343.7340231 | 0.842870103  | 3.241649144 | 2.2069226 |
| <b>rimK</b>  | gi 49175990 ref NC_000913.2 | + | 891190 | 892092 | 864.5743066 | 832.0128916 | 770.5034815 | 681.807997  | 733.608623  | 0.229250202  | 0.532483297 | 0.2285648 |
| <b>ybjN</b>  | gi 49175990 ref NC_000913.2 | + | 892180 | 892656 | 583.3434536 | 638.3112354 | 686.2925037 | 687.3980516 | 813.0030837 | -0.27203877  | 0.613584332 | 0.2715453 |
| <b>potF</b>  | gi 49175990 ref NC_000913.2 | + | 893007 | 894119 | 65.04555167 | 62.67156125 | 64.56776118 | 55.00309181 | 52.84022959 | 0.164683788  | 0.238016961 | 0.0853787 |
| <b>potG</b>  | gi 49175990 ref NC_000913.2 | + | 894214 | 895347 | 19.83219615 | 15.15046797 | 34.01122477 | 24.79902152 | 26.98350246 | -0.668461617 | 1.369980803 | 0.741885  |
| <b>potH</b>  | gi 49175990 ref NC_000913.2 | + | 895357 | 896310 | 23.59646897 | 18.95262031 | 20.87342463 | 17.9268655  | 13.61918026 | 0.315855326  | 0.324678312 | 0.1265519 |
| <b>potI</b>  | gi 49175990 ref NC_000913.2 | + | 896307 | 897152 | 36.5105732  | 25.56301528 | 29.04838775 | 19.32902435 | 33.43702204 | 0.227023379  | 0.213649726 | 0.0734101 |
| <b>ybjO</b>  | gi 49175990 ref NC_000913.2 | + | 897212 | 897700 | 105.0650051 | 116.8623758 | 71.50731363 | 58.52362637 | 76.12313585 | 0.680178259  | 2.387070631 | 1.508745  |
| <b>rlmD</b>  | gi 49175990 ref NC_000913.2 | + | 897741 | 898868 | 196.4987454 | 178.521231  | 159.7588813 | 127.9481033 | 125.8003692 | 0.467798462  | 1.193964839 | 0.6174173 |
| <b>artJ</b>  | gi 49175990 ref NC_000913.2 | - | 899067 | 899798 | 165.2411971 | 168.1193878 | 110.8822898 | 121.2342213 | 162.2236243 | 0.329521323  | 0.799855073 | 0.3686299 |
| <b>artM</b>  | gi 49175990 ref NC_000913.2 | - | 900089 | 900757 | 1212.011137 | 1251.863106 | 870.9356489 | 828.3841712 | 630.8336835 | 0.670077136  | 2.537829106 | 1.6346325 |
| <b>artQ</b>  | gi 49175990 ref NC_000913.2 | - | 900757 | 901473 | 1206.020401 | 1136.892542 | 853.483587  | 765.6713612 | 599.4273952 | 0.6683813251 | 2.510347906 | 1.613924  |
| <b>artI</b>  | gi 49175990 ref NC_000913.2 | - | 901480 | 902211 | 1359.711806 | 1385.780202 | 830.774668  | 912.4879086 | 842.4835063 | 0.659923883  | 2.794103769 | 1.8431542 |
| <b>artP</b>  | gi 49175990 ref NC_000913.2 | - | 902229 | 902957 | 1386.899757 | 1391.471565 | 963.8746352 | 1179.240965 | 1095.910108 | 0.354921925  | 1.046856813 | 0.5221887 |
| <b>ybjP</b>  | gi 49175990 ref NC_000913.2 | - | 903175 | 903690 | 1313.821195 | 1274.628753 | 1233.839582 | 1373.13152  | 1070.429313 | 0.083202225  | 0.144359407 | 0.0432419 |
| <b>ybjQ</b>  | gi 49175990 ref NC_000913.2 | + | 903816 | 904139 | 532.138152  | 599.3823047 | 579.2880894 | 495.7086286 | 525.0156162 | 0.074928355  | 0.159750639 | 0.049678  |
| <b>amiD</b>  | gi 49175990 ref NC_000913.2 | + | 904136 | 904966 | 650.7113848 | 617.3491272 | 877.2217648 | 699.7400331 | 659.8431048 | -0.212794694 | 0.529351503 | 0.2272311 |
| <b>ybjS</b>  | gi 49175990 ref NC_000913.2 | - | 904963 | 905976 | 591.0142947 | 627.8494545 | 604.7723686 | 558.4266129 | 581.0695341 | 0.062456097  | 0.124651621 | 0.0369374 |
| <b>ybjT</b>  | gi 49175990 ref NC_000913.2 | - | 906075 | 907505 | 495.3872258 | 483.4388305 | 568.6312611 | 532.5004628 | 459.0521374 | -0.077037985 | 0.156557809 | 0.0487535 |
| <b>itaE</b>  | gi 49175990 ref NC_000913.2 | - | 907516 | 908517 | 722.4677395 | 601.1428356 | 807.2238825 | 715.3037959 | 627.3330112 | -0.079366597 | 0.214076858 | 0.073582  |

|             |                             |   |        |        |             |             |             |             |             |              |             |           |
|-------------|-----------------------------|---|--------|--------|-------------|-------------|-------------|-------------|-------------|--------------|-------------|-----------|
| <b>poxB</b> | gi 49175990 ref NC_000913.2 | - | 908554 | 910272 | 1553.317665 | 1366.714474 | 1917.29787  | 1649.172083 | 1294.939141 | -0.117925159 | 0.270997389 | 0.1005736 |
| <b>hcr</b>  | gi 49175990 ref NC_000913.2 | - | 910405 | 911373 | 130.8114321 | 120.5910005 | 400.9584969 | 263.631545  | 191.3423701 | -1.141359325 | 4.496111202 | 3.2910305 |
| <b>hcp</b>  | gi 49175990 ref NC_000913.2 | - | 911385 | 913037 | 207.8574654 | 188.9690933 | 1112.482612 | 422.2835063 | 416.9155878 | -1.645059121 | 6.511216046 | 5.0501362 |
| <b>ybjE</b> | gi 49175990 ref NC_000913.2 | - | 913181 | 914080 | 212.2789499 | 192.7677523 | 132.6375433 | 170.5138924 | 232.722042  | 0.175679321  | 0.321444479 | 0.1253096 |
| <b>aqpZ</b> | gi 49175990 ref NC_000913.2 | - | 914575 | 915270 | 76.0072392  | 96.00725661 | 101.8194724 | 85.36792053 | 95.3356013  | -0.149778746 | 0.207093989 | 0.0700822 |
| <b>ybjD</b> | gi 49175990 ref NC_000913.2 | + | 915696 | 917354 | 632.6671851 | 670.5900318 | 719.5240618 | 565.2783309 | 593.5219673 | 0.060852133  | 0.103727424 | 0.0277229 |
| <b>ybjX</b> | gi 49175990 ref NC_000913.2 | - | 917351 | 918343 | 1745.56819  | 1948.112847 | 934.0508736 | 902.6107684 | 970.2253819 | 0.96501834   | 5.260898951 | 3.9669549 |
| <b>macA</b> | gi 49175990 ref NC_000913.2 | + | 918458 | 919573 | 282.5687186 | 290.6504662 | 367.9758617 | 308.3955189 | 281.8073346 | -0.14860671  | 0.300662217 | 0.11561   |
| <b>macB</b> | gi 49175990 ref NC_000913.2 | + | 919570 | 921516 | 358.0074305 | 330.495035  | 441.1873016 | 415.85669   | 336.851692  | -0.189889525 | 0.438916787 | 0.1798317 |
| <b>cspD</b> | gi 49175990 ref NC_000913.2 | - | 921589 | 921813 | 2026.752242 | 2426.852666 | 3578.980491 | 4279.313147 | 4432.907869 | -0.915560604 | 3.792241401 | 2.6847541 |
| <b>clpS</b> | gi 49175990 ref NC_000913.2 | + | 922136 | 922456 | 805.4159897 | 740.8101086 | 1949.442051 | 1888.900356 | 1307.356987 | -1.127117555 | 5.65485231  | 4.307389  |
| <b>clpA</b> | gi 49175990 ref NC_000913.2 | + | 922487 | 924763 | 4367.465428 | 3981.562081 | 9001.637782 | 6240.325467 | 3691.407585 | -0.549281872 | 1.399513157 | 0.7607069 |
| <b>infA</b> | gi 49175990 ref NC_000913.2 | - | 925448 | 925666 | 2918.332712 | 2934.916817 | 2164.709529 | 2231.323205 | 3068.510326 | 0.22328863   | 0.495019702 | 0.2099578 |
| <b>aat</b>  | gi 49175990 ref NC_000913.2 | - | 925951 | 926655 | 507.8067749 | 526.2078404 | 409.1186818 | 438.4086627 | 486.6348572 | 0.206332537  | 0.518239726 | 0.2218965 |
| <b>cydC</b> | gi 49175990 ref NC_000913.2 | - | 926697 | 928418 | 1015.237852 | 1019.145606 | 944.7979548 | 939.594472  | 1018.423938 | 0.069794066  | 0.135450549 | 0.0404245 |
| <b>cydD</b> | gi 49175990 ref NC_000913.2 | - | 928419 | 930185 | 649.9628728 | 638.2608545 | 689.3012501 | 618.9041228 | 567.8091426 | 0.053102272  | 0.076113872 | 0.0184999 |
| <b>trxB</b> | gi 49175990 ref NC_000913.2 | - | 930308 | 931273 | 1471.657978 | 1669.825881 | 805.6541664 | 716.7623292 | 1023.671283 | 0.865992901  | 4.194956674 | 3.0269108 |
| <b>lrp</b>  | gi 49175990 ref NC_000913.2 | + | 931818 | 932312 | 1812.706442 | 1881.590827 | 1580.684812 | 1593.3365   | 2016.494109 | 0.082367542  | 0.167584236 | 0.0527977 |
| <b>ftsK</b> | gi 49175990 ref NC_000913.2 | + | 932447 | 936436 | 5075.093444 | 5109.03639  | 5034.770219 | 4757.094227 | 4913.199775 | 0.056142278  | 0.097261414 | 0.0262976 |
| <b>lolA</b> | gi 49175990 ref NC_000913.2 | + | 936595 | 937206 | 627.829881  | 653.4775328 | 836.5605447 | 735.5491364 | 704.6181424 | -0.228650282 | 0.450519702 | 0.2346796 |
| <b>rarA</b> | gi 49175990 ref NC_000913.2 | + | 937217 | 938560 | 1017.130859 | 1021.04523  | 1194.556125 | 1032.625634 | 929.0675615 | -0.036016125 | 0.073033629 | 0.017532  |
| <b>serS</b> | gi 49175990 ref NC_000913.2 | + | 938651 | 939943 | 6552.944577 | 6514.751674 | 6820.289852 | 6342.34389  | 6031.708014 | 0.036304752  | 0.052145071 | 0.0090216 |
| <b>dmsA</b> | gi 49175990 ref NC_000913.2 | + | 940182 | 942626 | 2104.39297  | 1747.561781 | 9042.590142 | 6832.033005 | 2816.687001 | -1.631613247 | 6.246461063 | 4.8240674 |
| <b>dmsB</b> | gi 49175990 ref NC_000913.2 | + | 942637 | 943254 | 591.3774444 | 564.1623149 | 2420.611058 | 2061.524009 | 1066.551388 | -1.647716325 | 8.22343327  | 6.5957901 |
| <b>dmsC</b> | gi 49175990 ref NC_000913.2 | + | 943256 | 944119 | 1114.887757 | 947.8323393 | 4668.42145  | 4125.560591 | 2362.052714 | -1.807176986 | 10.03493173 | 8.217409  |
| <b>ycaC</b> | gi 49175990 ref NC_000913.2 | - | 944154 | 944780 | 580.4366905 | 589.836298  | 647.360612  | 706.0814723 | 554.426471  | -0.120989149 | 0.226040152 | 0.0788232 |
| <b>ycaD</b> | gi 49175990 ref NC_000913.2 | + | 945094 | 946242 | 283.0303954 | 251.6456764 | 289.3992254 | 291.5471987 | 310.6353562 | -0.138550809 | 0.297612873 | 0.1148535 |
| <b>ycaM</b> | gi 49175990 ref NC_000913.2 | + | 946452 | 947882 | 227.5688993 | 242.244285  | 510.7068436 | 424.1304571 | 569.5460045 | -1.100666718 | 5.531690409 | 4.2030655 |
| <b>ycaN</b> | gi 49175990 ref NC_000913.2 | - | 947883 | 948791 | 83.16612314 | 86.44192523 | 101.1218693 | 86.65745919 | 134.1710296 | -0.347527792 | 0.727190687 | 0.3259863 |
| <b>ycaK</b> | gi 49175990 ref NC_000913.2 | + | 948891 | 949481 | 31.52864602 | 31.33794974 | 19.4404267  | 32.43132388 | 36.78039685 | 0.070865414  | 0.083380306 | 0.0209983 |
| <b>pflA</b> | gi 49175990 ref NC_000913.2 | - | 949563 | 950303 | 1502.881689 | 1561.504667 | 1255.353556 | 1120.353995 | 1548.68919  | 0.219520534  | 0.509971355 | 0.2187462 |
| <b>pflB</b> | gi 49175990 ref NC_000913.2 | - | 950495 | 952777 | 47295.95741 | 48991.30257 | 72312.53938 | 54632.66319 | 73029.1537  | -0.467858445 | 1.243721519 | 0.6525076 |
| <b>focA</b> | gi 49175990 ref NC_000913.2 | - | 952832 | 953689 | 5517.73896  | 6075.988742 | 5913.084433 | 4005.413602 | 7413.976072 | -0.00728457  | 0.010624228 | 0         |
| <b>ycaO</b> | gi 49175990 ref NC_000913.2 | - | 954095 | 955855 | 681.691621  | 635.3873714 | 461.9586389 | 448.613372  | 532.5952091 | 0.460003475  | 1.502775185 | 0.8272791 |
| <b>ycaP</b> | gi 49175990 ref NC_000913.2 | + | 955985 | 956677 | 249.6039121 | 220.2996401 | 210.7313185 | 215.1343186 | 178.5856934 | 0.241837714  | 0.47608693  | 0.2004252 |
| <b>serC</b> | gi 49175990 ref NC_000913.2 | + | 956876 | 957964 | 1619.076196 | 1639.376837 | 1358.253366 | 1272.536707 | 1234.013805 | 0.341174409  | 0.930570057 | 0.4525949 |
| <b>aroA</b> | gi 49175990 ref NC_000913.2 | + | 958035 | 959318 | 599.4594539 | 592.6730509 | 474.5641029 | 437.2806815 | 415.1835652 | 0.437409158  | 1.375784593 | 0.7449631 |
| <b>ycaL</b> | gi 49175990 ref NC_000913.2 | + | 959487 | 960251 | 51.97792571 | 61.78627333 | 41.30414582 | 40.45100139 | 48.10616902 | 0.371340731  | 0.844958868 | 0.39638   |
| <b>cmk</b>  | gi 49175990 ref NC_000913.2 | + | 960424 | 961107 | 2646.535854 | 3040.410935 | 2096.931157 | 2108.003608 | 2870.004309 | 0.241188901  | 0.6008254   | 0.2668653 |
| <b>rpsA</b> | gi 49175990 ref NC_000913.2 | + | 961218 | 962891 | 19457.99205 | 20473.21279 | 12268.37122 | 10907.92116 | 14415.04998 | 0.663067806  | 2.373181976 | 1.4988665 |
| <b>ihfB</b> | gi 49175990 ref NC_000913.2 | + | 963051 | 963335 | 2214.106694 | 2244.407498 | 2128.751291 | 2377.963785 | 2647.041057 | -0.107424262 | 0.164418741 | 0.0519869 |
| <b>ycal</b> | gi 49175990 ref NC_000913.2 | + | 963543 | 965807 | 233.2158714 | 250.7772363 | 254.8794801 | 270.1310529 | 256.9167179 | -0.118326172 | 0.18908807  | 0.0611353 |
| <b>msbA</b> | gi 49175990 ref NC_000913.2 | + | 965844 | 967592 | 2033.169171 | 1969.890174 | 1634.478657 | 1495.785741 | 1717.238026 | 0.31429487   | 0.762113059 | 0.3466446 |
| <b>lpXK</b> | gi 49175990 ref NC_000913.2 | + | 967589 | 968575 | 871.4997872 | 842.462917  | 856.4125513 | 741.1738621 | 716.95552   | 0.164865844  | 0.327255097 | 0.1279492 |
| <b>ycaQ</b> | gi 49175990 ref NC_000913.2 | + | 968612 | 969844 | 192.0276924 | 177.5786545 | 209.5268057 | 190.7383993 | 214.1696722 | -0.135967626 | 0.27360107  | 0.1020023 |
| <b>ycaR</b> | gi 49175990 ref NC_000913.2 | + | 969896 | 970078 | 190.7130395 | 179.4853764 | 381.0175981 | 234.5855398 | 192.3812233 | -0.502086571 | 1.332769647 | 0.7180515 |
| <b>kdsB</b> | gi 49175990 ref NC_000913.2 | + | 970075 | 970821 | 680.3873382 | 642.0417073 | 878.4513785 | 766.7810119 | 620.863469  | -0.13366106  | 0.297728573 | 0.1148535 |
| <b>ycbJ</b> | gi 49175990 ref NC_000913.2 | + | 970975 | 971868 | 939.0640839 | 895.6460392 | 3607.754864 | 3229.959337 | 2581.523443 | -1.756584933 | 11.55819741 | 9.6569018 |
| <b>ycbC</b> | gi 49175990 ref NC_000913.2 | - | 971845 | 972624 | 277.4013496 | 296.3659928 | 796.7289571 | 741.0186463 | 620.6300544 | -1.326894441 | 7.936739772 | 6.3224606 |
| <b>smtA</b> | gi 49175990 ref NC_000913.2 | + | 972760 | 973545 | 800.6378089 | 817.793559  | 906.9453134 | 765.9263465 | 821.1468913 | -0.034868075 | 0.065163113 | 0.0135708 |
| <b>mukF</b> | gi 49175990 ref NC_000913.2 | + | 973542 | 974864 | 618.436609  | 603.1146539 | 709.4428016 | 493.5548152 | 464.7592692 | 0.160399049  | 0.252489518 | 0.0920535 |
| <b>mukE</b> | gi 49175990 ref NC_000913.2 | + | 974845 | 975549 | 629.889072  | 597.402976  | 657.194059  | 559.5142643 | 503.9316754 | 0.11610111   | 0.182134411 | 0.0582252 |
| <b>mukB</b> | gi 49175990 ref NC_000913.2 | + | 975549 | 980009 | 3007.671054 | 2729.708261 | 3244.174034 | 2595.627779 | 2563.368103 | 0.060742633  | 0.059913364 | 0.0118829 |
| <b>ycbB</b> | gi 49175990 ref NC_000913.2 | + | 980270 | 982117 | 1398.843174 | 1421.871779 | 1662.965187 | 1586.26496  | 1196.20821  | -0.064153582 | 0.116231241 | 0.0327853 |
| <b>ycbK</b> | gi 49175990 ref NC_000913.2 | + | 982298 | 982846 | 1218.28418  | 1271.814258 | 1035.526554 | 1181.656755 | 1267.357666 | 0.085714845  | 0.194999319 | 0.0639399 |
| <b>ycbL</b> | gi 49175990 ref NC_000913.2 | + | 982873 | 983520 | 1392.597927 | 1389.56933  | 1403.312598 | 1281.546484 | 1278.860381 | 0.079470946  | 0.138975568 | 0.0415146 |
| <b>aspC</b> | gi 49175990 ref NC_000913.2 | - | 983742 | 984932 | 1298.670568 | 1262.282088 | 1627.78664  | 1177.462968 | 1172.483102 | -0.028499643 | 0.077485321 | 0.0190529 |

|             |                             |   |         |         |             |              |             |             |             |              |             |           |
|-------------|-----------------------------|---|---------|---------|-------------|--------------|-------------|-------------|-------------|--------------|-------------|-----------|
| <b>ompF</b> | gi 49175990 ref NC_000913.2 | - | 985117  | 986205  | 2003.890042 | 2085.801724  | 3428.632843 | 3297.50834  | 4174.746319 | -0.83951935  | 3.471409659 | 2.4104985 |
| <b>asnS</b> | gi 49175990 ref NC_000913.2 | - | 986808  | 988208  | 3937.306356 | 4066.155528  | 3023.455042 | 2674.148191 | 3128.376408 | 0.441342705  | 1.371688532 | 0.7426861 |
| <b>pncB</b> | gi 49175990 ref NC_000913.2 | - | 988377  | 989579  | 1609.934758 | 1487.363351  | 1257.658495 | 1182.916918 | 1270.871799 | 0.336620959  | 0.878048421 | 0.417045  |
| <b>pepN</b> | gi 49175990 ref NC_000913.2 | + | 989845  | 992457  | 3252.726802 | 3305.348438  | 4266.124892 | 3662.916031 | 3699.595299 | -0.235802835 | 0.540247486 | 0.2323307 |
| <b>ssuB</b> | gi 49175990 ref NC_000913.2 | - | 992500  | 993267  | 49.05921208 | 52.25353791  | 64.35412246 | 48.36450925 | 50.58035807 | -0.098590512 | 0.136120309 | 0.0407537 |
| <b>ssuC</b> | gi 49175990 ref NC_000913.2 | - | 993264  | 994055  | 8.464146691 | 13.34657405  | 8.329273478 | 11.22944049 | 14.44796657 | -0.105721972 | 0           | 0         |
| <b>ssuD</b> | gi 49175990 ref NC_000913.2 | - | 994066  | 995211  | 19.97555608 | 13.23236718  | 14.49772375 | 12.38725981 | 13.46886331 | 0.346149531  | 0.324811815 | 0.1265519 |
| <b>ssuA</b> | gi 49175990 ref NC_000913.2 | - | 995208  | 996167  | 16.52837985 | 14.22078524  | 11.52044913 | 26.71182162 | 25.64677289 | -0.477307329 | 0.594979482 | 0.2640472 |
| <b>ssuE</b> | gi 49175990 ref NC_000913.2 | - | 996160  | 996735  | 25.48229756 | 32.34258142  | 23.38588124 | 42.32635928 | 34.74897754 | -0.252682102 | 0.278936322 | 0.1051846 |
| <b>elfA</b> | gi 49175990 ref NC_000913.2 | + | 997091  | 997630  | 39.57993394 | 42.75758278  | 31.81241978 | 24.87447059 | 36.83367995 | 0.394013763  | 0.750557761 | 0.3411917 |
| <b>elfD</b> | gi 49175990 ref NC_000913.2 | + | 997713  | 998414  | 11.65777955 | 16.18862717  | 10.64276353 | 14.40278367 | 6.900361883 | 0.356151431  | 0.384245533 | 0.1532738 |
| <b>elfC</b> | gi 49175990 ref NC_000913.2 | + | 998439  | 1001039 | 84.58096604 | 82.62125488  | 76.77015234 | 76.18210913 | 66.33073235 | 0.200249898  | 0.368642177 | 0.1454051 |
| <b>elfG</b> | gi 49175990 ref NC_000913.2 | + | 1001030 | 1002100 | 64.84117459 | 68.39924669  | 67.99075917 | 80.58370042 | 71.83617856 | -0.151497386 | 0.222282805 | 0.0773895 |
| <b>ycbU</b> | gi 49175990 ref NC_000913.2 | + | 1002112 | 1002654 | 27.63643454 | 29.45370321  | 18.73774497 | 24.49718931 | 16.95511212 | 0.498345796  | 0.87066365  | 0.4130376 |
| <b>ycbV</b> | gi 49175990 ref NC_000913.2 | + | 1002662 | 1003177 | 29.15013168 | 39.009271659 | 37.109292   | 32.63374077 | 39.18011101 | -0.119820847 | 0.098797082 | 0.0262976 |
| <b>ycbF</b> | gi 49175990 ref NC_000913.2 | + | 1003170 | 1003880 | 170.6986418 | 150.9671654  | 220.7295711 | 235.5032098 | 268.9935904 | -0.577693393 | 1.863093939 | 1.0982776 |
| <b>pyrD</b> | gi 49175990 ref NC_000913.2 | + | 1003991 | 1005001 | 426.1056128 | 484.4586189  | 471.2812044 | 506.7105033 | 503.6254606 | -0.138727493 | 0.22684407  | 0.0791779 |
| <b>zapC</b> | gi 49175990 ref NC_000913.2 | + | 1005175 | 1005717 | 332.4290244 | 280.1164741  | 773.713346  | 358.1954471 | 323.7481714 | -0.595012032 | 1.588328831 | 0.8901046 |
| <b>ycbX</b> | gi 49175990 ref NC_000913.2 | - | 1005714 | 1006823 | 840.5423255 | 821.5722445  | 850.6102377 | 810.7558302 | 956.6275419 | -0.069089535 | 0.124689448 | 0.0369374 |
| <b>rimL</b> | gi 49175990 ref NC_000913.2 | + | 1007067 | 1009175 | 1338.982624 | 1111.188514  | 1121.655351 | 821.0755818 | 1048.712046 | 0.333062882  | 0.733317438 | 0.3288781 |
| <b>uup</b>  | gi 49175990 ref NC_000913.2 | + | 1009187 | 1011094 | 817.2115626 | 794.9753068  | 753.6003132 | 724.3537471 | 780.6533186 | 0.102598628  | 0.197844161 | 0.0651964 |
| <b>pqiA</b> | gi 49175990 ref NC_000913.2 | + | 1011224 | 1012477 | 565.5000055 | 540.4178725  | 439.4200553 | 438.4739878 | 498.9889277 | 0.272020566  | 0.688919268 | 0.3091873 |
| <b>pqiB</b> | gi 49175990 ref NC_000913.2 | + | 1012482 | 1014122 | 609.9250591 | 651.5974368  | 368.9199213 | 365.5459718 | 384.6977191 | 0.747475929  | 3.532302821 | 2.4627193 |
| <b>ymbA</b> | gi 49175990 ref NC_000913.2 | + | 1014119 | 1014682 | 350.5295307 | 381.8585601  | 257.3875344 | 244.5123914 | 266.8970275 | 0.503402214  | 1.741857422 | 1.0121848 |
| <b>rmf</b>  | gi 49175990 ref NC_000913.2 | + | 1014938 | 1015105 | 1868.238989 | 1621.257345  | 3706.864797 | 2742.238118 | 1471.538486 | -0.545658715 | 1.354131594 | 0.733667  |
| <b>fabA</b> | gi 49175990 ref NC_000913.2 | - | 1015175 | 1015693 | 2713.6159   | 2948.2518    | 2211.093027 | 2244.787462 | 3093.198327 | 0.148549909  | 0.328799908 | 0.1288186 |
| <b>ycbZ</b> | gi 49175990 ref NC_000913.2 | - | 1015762 | 1017522 | 1964.842578 | 2002.208022  | 2015.316627 | 1815.367524 | 2211.837557 | -0.024743097 | 0.029938303 | 0.0018598 |
| <b>matP</b> | gi 49175990 ref NC_000913.2 | + | 1017708 | 1018160 | 287.0776114 | 286.8385405  | 267.4376231 | 539.8718847 | 501.0969544 | -0.632531349 | 1.612873686 | 0.9092943 |
| <b>ompA</b> | gi 49175990 ref NC_000913.2 | - | 1018236 | 1019276 | 46779.38528 | 45599.49509  | 43949.02659 | 46416.3556  | 40645.08437 | 0.085109369  | 0.141773065 | 0.0425377 |
| <b>sulA</b> | gi 49175990 ref NC_000913.2 | - | 1019633 | 1020142 | 1959.530705 | 2153.264719  | 904.7116853 | 1097.678434 | 1391.536851 | 0.833100602  | 3.587012892 | 2.5123926 |
| <b>sxy</b>  | gi 49175990 ref NC_000913.2 | + | 1020361 | 1020990 | 179.8416711 | 177.6054235  | 215.1384937 | 238.6690953 | 214.3367767 | -0.317884616 | 0.743861586 | 0.3361804 |
| <b>yccS</b> | gi 49175990 ref NC_000913.2 | - | 1020953 | 1023106 | 908.6987256 | 886.1583371  | 796.274275  | 773.7392873 | 906.1463081 | 0.121660329  | 2.48721099  | 0.0906571 |
| <b>yccF</b> | gi 49175990 ref NC_000913.2 | - | 1023125 | 1023571 | 291.4492793 | 295.3930879  | 251.0067117 | 252.342586  | 282.5238182 | 0.158867405  | 0.335497694 | 0.1322937 |
| <b>helD</b> | gi 49175990 ref NC_000913.2 | + | 1023694 | 1025748 | 797.7976633 | 743.6657044  | 835.0076002 | 756.7102498 | 608.3613354 | -0.09229191  | 0.132807549 | 0.0396928 |
| <b>mgsA</b> | gi 49175990 ref NC_000913.2 | + | 1025780 | 1026238 | 1693.433409 | 1764.765873  | 3938.180879 | 3317.572013 | 3126.505811 | -0.996156052 | 4.52401895  | 3.3137783 |
| <b>yccT</b> | gi 49175990 ref NC_000913.2 | - | 1026334 | 1026996 | 99.69649684 | 125.4578259  | 102.3823186 | 107.6304021 | 110.9975823 | 0.041352301  | 0.113904109 | 0.0321348 |
| <b>yccU</b> | gi 49175990 ref NC_000913.2 | + | 1027169 | 1027582 | 429.2618877 | 402.6872934  | 933.5630193 | 744.3905025 | 498.7188037 | -0.771524274 | 2.755624155 | 1.8159556 |
| <b>hspQ</b> | gi 49175990 ref NC_000913.2 | - | 1027627 | 1027944 | 512.6544749 | 564.2283138  | 635.5853024 | 602.2002376 | 687.4720803 | -0.267343534 | 0.591539911 | 0.2617484 |
| <b>rimI</b> | gi 49175990 ref NC_000913.2 | - | 1028002 | 1029192 | 682.932959  | 771.3002398  | 712.91203   | 737.8131809 | 855.6339617 | -0.103192984 | 0.143952331 | 0.0431373 |
| <b>yccX</b> | gi 49175990 ref NC_000913.2 | + | 1029287 | 1029565 | 132.2115774 | 182.4908239  | 196.2074673 | 190.5971265 | 182.923976  | -0.311103554 | 0.574727684 | 0.2512697 |
| <b>tusE</b> | gi 49175990 ref NC_000913.2 | - | 1029562 | 1029891 | 235.6569618 | 260.2870855  | 218.0023356 | 215.4376975 | 272.265255  | 0.057391323  | 0.128933535 | 0.0376665 |
| <b>yccA</b> | gi 49175990 ref NC_000913.2 | - | 1029982 | 1030641 | 3765.211024 | 3709.003355  | 3678.018881 | 3789.527929 | 4150.255677 | -0.053096348 | 0.082981008 | 0.0209983 |
| <b>hyaA</b> | gi 49175990 ref NC_000913.2 | + | 1031362 | 1032480 | 66.5483977  | 76.0246123   | 184.8761165 | 174.7012042 | 113.8019713 | -1.148775034 | 4.834739291 | 3.5844338 |
| <b>hyaB</b> | gi 49175990 ref NC_000913.2 | + | 1032477 | 1034270 | 47.62911776 | 55.12758663  | 163.8788362 | 128.7610536 | 59.11286278 | -1.178228282 | 3.531054491 | 2.4627193 |
| <b>hyaC</b> | gi 49175990 ref NC_000913.2 | + | 1034289 | 1034996 | 18.41532142 | 16.12128693  | 50.21717007 | 27.10391132 | 22.75727985 | -0.903784868 | 2.015332666 | 1.2095577 |
| <b>hyaD</b> | gi 49175990 ref NC_000913.2 | + | 1034993 | 1035580 | 50.79339754 | 42.68975245  | 98.83422967 | 99.51593124 | 57.70425822 | -0.837137661 | 2.582131141 | 1.6685731 |
| <b>hyaE</b> | gi 49175990 ref NC_000913.2 | + | 1035577 | 1035975 | 32.42179331 | 16.97572408  | 84.30090081 | 49.49731058 | 35.25483775 | -1.094970763 | 2.97084701  | 1.9893215 |
| <b>hyaF</b> | gi 49175990 ref NC_000913.2 | + | 1035972 | 1036829 | 35.65295891 | 41.82870708  | 88.89934871 | 52.9984636  | 59.62069645 | -0.788597285 | 2.169100364 | 1.3280853 |
| <b>appC</b> | gi 49175990 ref NC_000913.2 | + | 1036963 | 1038507 | 101.7225433 | 64.43728786  | 108.5927941 | 109.7774437 | 92.17506117 | -0.262628427 | 0.672082299 | 0.3012117 |
| <b>appB</b> | gi 49175990 ref NC_000913.2 | + | 1038519 | 1039655 | 107.7032666 | 90.1656007   | 124.1759472 | 169.0275345 | 149.1810486 | -0.564146652 | 1.67505694  | 1.0193581 |
| <b>yccB</b> | gi 49175990 ref NC_000913.2 | + | 1039668 | 1039760 | 46.58571456 | 48.44703416  | 68.89012392 | 108.5531689 | 111.9138838 | -1.042922465 | 3.677949761 | 2.5865493 |
| <b>appA</b> | gi 49175990 ref NC_000913.2 | + | 1039840 | 1041138 | 99.36699597 | 87.33322052  | 113.3462571 | 88.71753473 | 88.76405448 | -0.026731758 | 0.068761217 | 0.016354  |
| <b>etk</b>  | gi 49175990 ref NC_000913.2 | - | 1041253 | 1043433 | 366.9641353 | 396.1017031  | 264.5213808 | 268.1161957 | 336.1874222 | 0.380729248  | 1.138039656 | 0.5812037 |
| <b>etp</b>  | gi 49175990 ref NC_000913.2 | - | 1043453 | 1043899 | 32.88846658 | 19.84413923  | 10.80186439 | 14.48030854 | 11.26911954 | 1.153438931  | 2.40466282  | 1.5222897 |
| <b>gfcE</b> | gi 49175990 ref NC_000913.2 | - | 1043887 | 1045026 | 75.31892232 | 67.39639092  | 29.97135401 | 42.54831731 | 48.01225836 | 0.825835834  | 2.677567538 | 1.7539132 |
| <b>gfcD</b> | gi 49175990 ref NC_000913.2 | - | 1045072 | 1047168 | 164.7329734 | 199.5358299  | 138.2518098 | 134.6836207 | 163.5486486 | 0.295061339  | 0.758739882 | 0.3450565 |
| <b>gfcC</b> | gi 49175990 ref NC_000913.2 | - | 1047168 | 1047914 | 41.95769597 | 66.62278095  | 30.527806   | 27.02651151 | 33.55318943 | 0.783790473  | 2.367508176 | 1.4947864 |



|             |                             |   |         |         |             |             |             |             |             |              |             |           |
|-------------|-----------------------------|---|---------|---------|-------------|-------------|-------------|-------------|-------------|--------------|-------------|-----------|
| <b>gfcB</b> | gi 49175990 ref NC_000913.2 | - | 1047911 | 1048555 | 58.79277859 | 55.06509148 | 17.82953556 | 23.56756997 | 30.06209195 | 1.24829055   | 4.778273041 | 3.5357146 |
| <b>gfcA</b> | gi 49175990 ref NC_000913.2 | - | 1048662 | 1048967 | 116.4423425 | 128.2572702 | 93.3551136  | 93.23871162 | 125.2841094 | 0.215870621  | 0.482221646 | 0.2027933 |
| <b>insA</b> | gi 49175990 ref NC_000913.2 | + | 1049056 | 1049331 | 177.0575642 | 190.9390716 | 147.1012157 | 190.603065  | 232.8792915 | -0.073833406 | 0.060808232 | 0.0119952 |
| <b>insB</b> | gi 49175990 ref NC_000913.2 | + | 1049250 | 1049753 | 618.6677156 | 679.1547968 | 450.9410257 | 610.8538941 | 633.5174771 | 0.171027829  | 0.424790661 | 0.1739525 |
| <b>cspH</b> | gi 49175990 ref NC_000913.2 | - | 1050186 | 1050398 | 577.1901065 | 729.5615923 | 286.3890584 | 655.3522667 | 652.3428682 | 0.230117601  | 0.551925582 | 0.2392178 |
| <b>cspG</b> | gi 49175990 ref NC_000913.2 | + | 1050684 | 1050896 | 13617.94124 | 14857.94368 | 9549.908315 | 14766.17629 | 13358.58861 | 0.149740815  | 0.341801927 | 0.1341942 |
| <b>ymcE</b> | gi 49175990 ref NC_000913.2 | + | 1051070 | 1051300 | 1763.91389  | 1623.18449  | 996.1573542 | 1404.44713  | 1255.161693 | 0.472681181  | 1.453392601 | 0.7948157 |
| <b>gnsA</b> | gi 49175990 ref NC_000913.2 | + | 1051290 | 1051463 | 743.8304737 | 763.656754  | 208.869884  | 794.1285108 | 781.134906  | 0.289149532  | 0.517853837 | 0.2218965 |
| <b>yccM</b> | gi 49175990 ref NC_000913.2 | - | 1051512 | 1052585 | 306.0371062 | 302.9813091 | 435.9365776 | 418.0788959 | 335.729649  | -0.372094068 | 1.030042892 | 0.5156465 |
| <b>torS</b> | gi 49175990 ref NC_000913.2 | - | 1052657 | 1055401 | 287.8683344 | 273.5194225 | 251.2378809 | 273.5757428 | 298.2094609 | 0.033974929  | 0.052414195 | 0.0090435 |
| <b>torT</b> | gi 49175990 ref NC_000913.2 | + | 1055484 | 1056512 | 127.1236665 | 112.9792926 | 150.6406336 | 130.1090861 | 120.2142646 | -0.130600707 | 0.279799235 | 0.1055868 |
| <b>torR</b> | gi 49175990 ref NC_000913.2 | - | 1056485 | 1057177 | 131.9303539 | 160.5924867 | 105.8081334 | 93.14792065 | 95.40262461 | 0.555378671  | 1.864029276 | 1.098592  |
| <b>torC</b> | gi 49175990 ref NC_000913.2 | + | 1057307 | 1058479 | 57.91998951 | 54.11675879 | 24.75315625 | 16.94932415 | 19.12084527 | 1.476568597  | 6.152477426 | 4.7356876 |
| <b>torA</b> | gi 49175990 ref NC_000913.2 | + | 1058479 | 1061025 | 136.8792674 | 137.7208031 | 72.91216657 | 78.34099643 | 63.00174044 | 0.943039196  | 4.284403184 | 3.1042411 |
| <b>torD</b> | gi 49175990 ref NC_000913.2 | + | 1061022 | 1061621 | 75.61861397 | 77.89016408 | 66.01551591 | 60.55028195 | 55.09977377 | 0.34430948   | 0.762072608 | 0.3466446 |
| <b>cbpM</b> | gi 49175990 ref NC_000913.2 | - | 1061773 | 1062078 | 409.5921439 | 397.0036095 | 518.5372724 | 552.4927973 | 424.3433415 | 0.261947473  | 0.761947473 | 0.3466446 |
| <b>cbpA</b> | gi 49175990 ref NC_000913.2 | - | 1062078 | 1062998 | 665.6366057 | 673.4177174 | 748.1778008 | 918.7607855 | 533.4150886 | -0.131681488 | 0.230163621 | 0.0812973 |
| <b>yccE</b> | gi 49175990 ref NC_000913.2 | + | 1063259 | 1064515 | 30.76204318 | 33.2572244  | 5.742394549 | 8.999490317 | 13.27773564 | 1.74104036   | 5.456609819 | 4.13673   |
| <b>agg</b>  | gi 49175990 ref NC_000913.2 | + | 1064808 | 1066049 | 803.2455053 | 800.6855878 | 2228.10656  | 2245.338245 | 1452.118663 | -1.28985753  | 6.498588972 | 5.0470371 |
| <b>yccJ</b> | gi 49175990 ref NC_000913.2 | - | 1066087 | 1066314 | 790.3503552 | 853.9130722 | 453.7529218 | 3918.347021 | 2995.525431 | -2.211140374 | 16.45840274 | 10.052608 |
| <b>wrbA</b> | gi 49175990 ref NC_000913.2 | - | 1066335 | 1066931 | 880.5052384 | 810.1463742 | 5997.585759 | 5312.779225 | 2679.620634 | -2.429382446 | 15.54864161 | 13.217481 |
| <b>ymdF</b> | gi 49175990 ref NC_000913.2 | + | 1067304 | 1067477 | 65.47630009 | 90.33834266 | 33.28199816 | 70.33558369 | 69.27669921 | 0.368129732  | 0.872854706 | 0.4140035 |
| <b>rutG</b> | gi 49175990 ref NC_000913.2 | - | 1067734 | 1069062 | 60.60051154 | 43.59522512 | 51.2429966  | 70.52559665 | 73.85030535 | -0.299687366 | 0.612017563 | 0.2709151 |
| <b>rutF</b> | gi 49175990 ref NC_000913.2 | - | 1069083 | 1069577 | 12.83394361 | 9.459337712 | 15.68518795 | 10.23358794 | 14.54335018 | -0.234756398 | 0.219261355 | 0.0760663 |
| <b>rutE</b> | gi 49175990 ref NC_000913.2 | - | 1069588 | 1070178 | 13.21414032 | 13.29360878 | 14.6576957  | 13.52460101 | 16.75862426 | -0.173478253 | 0.159481982 | 0.049678  |
| <b>rutD</b> | gi 49175990 ref NC_000913.2 | - | 1070188 | 1070988 | 13.76364762 | 6.573728418 | 11.73594348 | 10.09048538 | 7.949291262 | 0.106469194  | 0           | 0         |
| <b>rutC</b> | gi 49175990 ref NC_000913.2 | - | 1070996 | 1071382 | 10.62544256 | 3.725680333 | 13.18368962 | 14.4815914  | 9.116700389 | -0.68138792  | 0.829809786 | 0.3863255 |
| <b>rutB</b> | gi 49175990 ref NC_000913.2 | - | 1071394 | 1072086 | 10.71538499 | 10.44043605 | 18.27745717 | 14.61840043 | 13.54840975 | -0.530039001 | 0.621007223 | 0.2767412 |
| <b>rutA</b> | gi 49175990 ref NC_000913.2 | - | 1072086 | 1073234 | 13.17137255 | 5.620308004 | 11.68890518 | 6.853612713 | 10.07756299 | 0.058864709  | 0           | 0         |
| <b>rutR</b> | gi 49175990 ref NC_000913.2 | + | 1073465 | 1074103 | 188.9882951 | 168.0650799 | 198.0305124 | 158.1815759 | 142.7324753 | 0.131361536  | 0.170807782 | 0.0537934 |
| <b>putA</b> | gi 49175990 ref NC_000913.2 | - | 1074143 | 1078105 | 1009.410916 | 882.3082316 | 292.7678177 | 264.6427083 | 253.6476784 | 1.831643225  | 16.02022672 | 13.640761 |
| <b>putP</b> | gi 49175990 ref NC_000913.2 | + | 1078528 | 1080036 | 403.3204232 | 319.0307502 | 249.4050871 | 204.0116501 | 145.2210591 | 0.905640488  | 3.350260631 | 2.306194  |
| <b>efeO</b> | gi 49175990 ref NC_000913.2 | + | 1081466 | 1082593 | 103.061532  | 93.994225   | 36.43303622 | 48.12347953 | 49.23817129 | 1.142813135  | 5.172572213 | 3.8828041 |
| <b>efeB</b> | gi 49175990 ref NC_000913.2 | + | 1082599 | 1083870 | 83.339475   | 80.1787836  | 46.40707585 | 36.02116647 | 40.40243048 | 1.017290983  | 4.015470768 | 2.8649488 |
| <b>phaH</b> | gi 49175990 ref NC_000913.2 | + | 1084215 | 1085279 | 145.2816905 | 170.0757637 | 80.28790531 | 96.40138974 | 107.470304  | 0.70402918   | 2.73367584  | 1.7998022 |
| <b>pgaD</b> | gi 49175990 ref NC_000913.2 | - | 1085329 | 1085742 | 61.70541604 | 64.59726221 | 48.0479975  | 54.86994261 | 52.71125231 | 0.274158221  | 0.562203732 | 0.2454308 |
| <b>pgaC</b> | gi 49175990 ref NC_000913.2 | - | 1085744 | 1087069 | 30.04760165 | 34.21940452 | 42.43497689 | 33.86422765 | 49.14833019 | -0.390588699 | 0.660668134 | 0.297006  |
| <b>pgaB</b> | gi 49175990 ref NC_000913.2 | - | 1087062 | 1089080 | 75.83024662 | 54.03242956 | 78.23344328 | 63.06367997 | 89.48759689 | -0.203647162 | 0.435544767 | 0.1778513 |
| <b>pgaA</b> | gi 49175990 ref NC_000913.2 | - | 1089089 | 1091512 | 169.3418589 | 191.9094071 | 146.6793956 | 165.9972436 | 200.4631404 | 0.052041646  | 1.26659212  | 0.0373086 |
| <b>ycdT</b> | gi 49175990 ref NC_000913.2 | + | 1092099 | 1093457 | 129.9936161 | 128.2150117 | 98.4542586  | 140.2682851 | 208.9902167 | -0.230950677 | 0.327627711 | 0.128073  |
| <b>insF</b> | gi 49175990 ref NC_000913.2 | - | 1093498 | 1094364 | 134.7548975 | 147.2514868 | 186.1821394 | 215.1431224 | 205.2582007 | -0.536665587 | 1.538808214 | 0.8557505 |
| <b>insE</b> | gi 49175990 ref NC_000913.2 | - | 1094361 | 1094660 | 67.14124572 | 77.92982614 | 96.02736785 | 70.82164476 | 74.16146196 | -0.151798243 | 0.232878294 | 0.0823564 |
| <b>ycdU</b> | gi 49175990 ref NC_000913.2 | + | 1095066 | 1096052 | 32.09563782 | 21.76360623 | 13.0302225  | 25.80869952 | 38.78965504 | 0.067470743  | 0.03597543  | 0.0036811 |
| <b>ghrA</b> | gi 49175990 ref NC_000913.2 | + | 1097109 | 1098047 | 865.0383951 | 728.4222499 | 740.8851323 | 617.8917549 | 612.6262564 | 0.311819263  | 0.70478679  | 0.3157646 |
| <b>ycdX</b> | gi 49175990 ref NC_000913.2 | + | 1098102 | 1098839 | 741.9933765 | 749.4018968 | 690.9108308 | 683.8065109 | 588.0210085 | 0.191648052  | 0.430150217 | 0.1762871 |
| <b>ycdY</b> | gi 49175990 ref NC_000913.2 | + | 1098863 | 1099417 | 659.2558222 | 681.025951  | 495.1527587 | 467.7363006 | 590.8470052 | 0.363875254  | 1.043892768 | 0.5210963 |
| <b>ycdZ</b> | gi 49175990 ref NC_000913.2 | + | 1099519 | 1100010 | 1216.931549 | 1304.120448 | 1262.403908 | 1423.852404 | 1564.584742 | -0.187064477 | 0.34273117  | 0.1341942 |
| <b>csgG</b> | gi 49175990 ref NC_000913.2 | - | 1100074 | 1100907 | 119.5486249 | 133.9631215 | 111.5749619 | 175.8392946 | 191.441915  | -0.36808052  | 0.676996952 | 0.3033725 |
| <b>csgF</b> | gi 49175990 ref NC_000913.2 | - | 1100934 | 1101350 | 5.040489558 | 4.740808851 | 6.425105136 | 2.359292457 | 5.574724205 | 0.058287219  | 0           | 0         |
| <b>csgD</b> | gi 49175990 ref NC_000913.2 | - | 1101769 | 1102419 | 13.21651012 | 23.84257693 | 9.603043658 | 9.110034717 | 17.69437922 | 0.540806946  | 0.844926388 | 0.39638   |
| <b>csgB</b> | gi 49175990 ref NC_000913.2 | + | 1103174 | 1103629 | 11.12463735 | 5.637997985 | 13.86480304 | 7.879650002 | 3.570347504 | 0.074375093  | 0           | 0         |
| <b>csgA</b> | gi 49175990 ref NC_000913.2 | + | 1103670 | 1104125 | 48.28693958 | 55.12360402 | 64.92773119 | 63.89766045 | 60.64040503 | -0.300623758 | 0.546478596 | 0.235234  |
| <b>csgC</b> | gi 49175990 ref NC_000913.2 | + | 1104184 | 1104516 | 36.40425726 | 39.9112183  | 30.92619803 | 32.61907462 | 43.50799347 | 0.079828893  | 0.103611161 | 0.0277229 |
| <b>ymdA</b> | gi 49175990 ref NC_000913.2 | + | 1104637 | 1104948 | 13.14454103 | 14.25376002 | 21.29367892 | 20.24450307 | 23.49613302 | -0.663697043 | 0.994158865 | 0.4894139 |
| <b>ymdB</b> | gi 49175990 ref NC_000913.2 | + | 1105043 | 1105576 | 214.9170716 | 188.0035587 | 388.8196765 | 344.0375151 | 226.0591425 | -0.631777194 | 2.056273459 | 1.2422391 |
| <b>ymdC</b> | gi 49175990 ref NC_000913.2 | + | 1105578 | 1106999 | 486.0689379 | 453.9748903 | 655.9258756 | 643.2886544 | 432.4072981 | -0.276381434 | 0.671701334 | 0.3010864 |
| <b>opgC</b> | gi 49175990 ref NC_000913.2 | - | 1107007 | 1108164 | 226.683425  | 262.2067164 | 141.6731656 | 187.143182  | 204.9888751 | 0.423772084  | 1.246870687 | 0.654824  |

|             |                             |   |         |         |              |             |             |             |             |              |             |           |
|-------------|-----------------------------|---|---------|---------|--------------|-------------|-------------|-------------|-------------|--------------|-------------|-----------|
| <b>opgG</b> | gi 49175990 ref NC_000913.2 | + | 1108558 | 1110093 | 2503.765922  | 2516.999455 | 2188.061237 | 2372.263585 | 2298.430851 | 0.130835486  | 0.265441054 | 0.0972218 |
| <b>opgH</b> | gi 49175990 ref NC_000913.2 | + | 1110086 | 1112629 | 3027.42321   | 3107.792522 | 2942.576742 | 2613.614051 | 3102.548819 | 0.085684561  | 0.164920126 | 0.0519869 |
| <b>yceK</b> | gi 49175990 ref NC_000913.2 | + | 1112802 | 1113029 | 734.2130154  | 788.3730167 | 529.0139291 | 782.026264  | 586.8373424 | 0.244504909  | 0.636075118 | 0.284622  |
| <b>msyB</b> | gi 49175990 ref NC_000913.2 | - | 1113030 | 1113404 | 634.3301364  | 597.3997512 | 439.6377618 | 591.4392304 | 403.0468378 | 0.367805046  | 0.968401805 | 0.4717621 |
| <b>mdtG</b> | gi 49175990 ref NC_000913.2 | - | 1114487 | 1114713 | 244.6513548  | 256.465228  | 342.0545195 | 354.1126796 | 284.0781348 | -0.385692129 | 1.023462558 | 0.5114992 |
| <b>lpxL</b> | gi 49175990 ref NC_000913.2 | - | 1114885 | 1115805 | 881.8208465  | 959.3456356 | 890.4979602 | 837.7196464 | 1053.002712 | -0.02513719  | 0.011372566 | 0         |
| <b>yceA</b> | gi 49175990 ref NC_000913.2 | + | 1116030 | 1117082 | 220.682258   | 230.8190742 | 132.0254273 | 169.095511  | 155.8889195 | 0.551949487  | 1.855463437 | 1.0918861 |
| <b>yceI</b> | gi 49175990 ref NC_000913.2 | - | 1117124 | 1117699 | 87.74364829  | 85.46963652 | 39.67756427 | 67.11010042 | 72.61672616 | 0.515703722  | 1.329899994 | 0.7169348 |
| <b>yceJ</b> | gi 49175990 ref NC_000913.2 | - | 1117703 | 1118269 | 54.49997254  | 64.63592041 | 37.41191271 | 36.01562106 | 48.01836507 | 0.532540945  | 1.405485552 | 0.7626509 |
| <b>solA</b> | gi 49175990 ref NC_000913.2 | - | 1118691 | 1119809 | 513.4040175  | 545.2154393 | 410.1364051 | 395.9022714 | 457.488281  | 0.319307686  | 0.924993495 | 0.4496612 |
| <b>bssS</b> | gi 49175990 ref NC_000913.2 | - | 1119924 | 1120178 | 2456.802574  | 2666.157098 | 4816.45204  | 5831.892287 | 4838.195522 | -1.028061328 | 4.759086655 | 3.5220842 |
| <b>dinI</b> | gi 49175990 ref NC_000913.2 | - | 1120465 | 1120710 | 771.360876   | 848.2225545 | 325.8059788 | 338.7973716 | 459.4205386 | 1.088529571  | 6.076839498 | 4.6710451 |
| <b>pyrC</b> | gi 49175990 ref NC_000913.2 | - | 1120784 | 1121830 | 379.6948374  | 396.0862924 | 305.8261548 | 339.7577706 | 393.4442079 | 0.148973066  | 0.339598923 | 0.1335511 |
| <b>yceB</b> | gi 49175990 ref NC_000913.2 | - | 1121936 | 1122496 | 419.7856119  | 395.0903041 | 353.9268408 | 460.6436935 | 474.2753947 | -0.08114186  | 0.127697395 | 0.0373086 |
| <b>grxB</b> | gi 49175990 ref NC_000913.2 | - | 1122630 | 1123277 | 992.501941   | 1002.051708 | 1261.795003 | 1313.916992 | 1242.945451 | -0.354008493 | 0.982430119 | 0.4800648 |
| <b>mdtH</b> | gi 49175990 ref NC_000913.2 | - | 1123341 | 1124549 | 75.55873236  | 79.79829179 | 112.5278774 | 109.8529918 | 76.63279818 | -0.45457344  | 1.235071889 | 0.645933  |
| <b>rimJ</b> | gi 49175990 ref NC_000913.2 | + | 1124785 | 1125369 | 859.1259358  | 928.9486966 | 1093.019114 | 1063.954525 | 1005.188993 | -0.245789623 | 0.554662258 | 0.2405348 |
| <b>yceH</b> | gi 49175990 ref NC_000913.2 | + | 1125380 | 1126027 | 575.4928871  | 567.0265658 | 704.8568227 | 616.6036173 | 499.5626116 | -0.073118676 | 0.148111097 | 0.0446157 |
| <b>yceM</b> | gi 49175990 ref NC_000913.2 | + | 1126029 | 1126952 | 718.5131698  | 627.7593914 | 1009.329132 | 957.4669917 | 905.3720696 | -0.484968791 | 1.724050058 | 0.998931  |
| <b>murJ</b> | gi 49175990 ref NC_000913.2 | + | 1127062 | 1128597 | 556.8709388  | 604.1138635 | 474.2156508 | 578.2879809 | 518.2741263 | 0.1302358    | 0.308155406 | 0.1190216 |
| <b>flgN</b> | gi 49175990 ref NC_000913.2 | - | 1128637 | 1129053 | 763.5675689  | 744.6364759 | 871.7587465 | 1344.974283 | 1218.065949 | -0.617091128 | 1.957802902 | 1.1674324 |
| <b>flgM</b> | gi 49175990 ref NC_000913.2 | - | 1129058 | 1129351 | 784.4662605  | 748.4255214 | 1149.570058 | 1435.902867 | 1241.830965 | -0.735975136 | 2.956730043 | 1.9772435 |
| <b>flgA</b> | gi 49175990 ref NC_000913.2 | - | 1129427 | 1130086 | 778.4409816  | 821.6083581 | 1193.261294 | 690.0062958 | 797.8014391 | -0.141406498 | 0.289536265 | 0.1110664 |
| <b>flgB</b> | gi 49175990 ref NC_000913.2 | + | 1130241 | 1130657 | 2611.917555  | 2926.421197 | 3403.486307 | 2231.644706 | 3305.499972 | -0.111288596 | 0.17751026  | 0.0561466 |
| <b>flgC</b> | gi 49175990 ref NC_000913.2 | + | 1130661 | 1131065 | 3192.938311  | 3104.916872 | 4130.733489 | 3096.989794 | 3929.310339 | -0.227307842 | 0.523745834 | 0.2243123 |
| <b>flgD</b> | gi 49175990 ref NC_000913.2 | + | 1131077 | 1131772 | 4742.7057871 | 4578.071266 | 6254.874845 | 4974.811719 | 5804.931005 | -0.271880219 | 0.650095418 | 0.2910887 |
| <b>flgE</b> | gi 49175990 ref NC_000913.2 | + | 1131797 | 1133005 | 5979.037362  | 5462.319494 | 8274.809881 | 5761.942804 | 6620.574846 | -0.238502523 | 0.563722789 | 0.246286  |
| <b>flgF</b> | gi 49175990 ref NC_000913.2 | + | 1133025 | 1133780 | 2891.005933  | 2572.980097 | 4363.323785 | 3076.703826 | 3045.812987 | -0.319212763 | 0.865717879 | 0.4093135 |
| <b>flgG</b> | gi 49175990 ref NC_000913.2 | + | 1133952 | 1134734 | 3416.303547  | 3330.973339 | 5044.476309 | 3804.328013 | 4122.491402 | -0.341222093 | 0.904750661 | 0.4351343 |
| <b>flgH</b> | gi 49175990 ref NC_000913.2 | + | 1134787 | 1135485 | 963.4865742  | 969.7566423 | 1426.559547 | 1092.252612 | 1165.607571 | -0.333768251 | 0.9134876   | 0.4415479 |
| <b>flgI</b> | gi 49175990 ref NC_000913.2 | + | 1135497 | 1136594 | 1589.463847  | 1589.030706 | 2208.168927 | 1847.773511 | 1787.121432 | -0.282916359 | 0.666737998 | 0.298619  |
| <b>flgJ</b> | gi 49175990 ref NC_000913.2 | + | 1136594 | 1137535 | 1417.419125  | 1331.602211 | 1974.929388 | 1675.165849 | 1770.153256 | -0.378244657 | 1.060360721 | 0.5299893 |
| <b>flgK</b> | gi 49175990 ref NC_000913.2 | + | 1137601 | 1139244 | 2793.80541   | 2570.146475 | 5674.985115 | 5226.713302 | 4316.784519 | -0.898411606 | 3.980253741 | 2.8342323 |
| <b>flgL</b> | gi 49175990 ref NC_000913.2 | + | 1139256 | 1140209 | 2231.386553  | 2112.350823 | 4058.887285 | 4458.740287 | 4521.624677 | -0.998115064 | 4.93475428  | 3.6750879 |
| <b>rne</b>  | gi 49175990 ref NC_000913.2 | + | 1140405 | 1143590 | 6710.254768  | 6326.663277 | 7051.680669 | 6326.902414 | 8178.239733 | -0.133483978 | 0.253463142 | 0.0293968 |
| <b>yceQ</b> | gi 49175990 ref NC_000913.2 | + | 1143725 | 1144045 | 896.4376241  | 946.0337834 | 766.657754  | 878.0248149 | 1189.557578 | -0.058403032 | 0.051413615 | 0.0088785 |
| <b>rluC</b> | gi 49175990 ref NC_000913.2 | + | 1144163 | 1145122 | 500.0397108  | 454.9128901 | 306.9652245 | 333.0017642 | 364.3842495 | 0.519197613  | 1.732753575 | 1.0056234 |
| <b>yceF</b> | gi 49175990 ref NC_000913.2 | - | 1145234 | 1145818 | 471.7429443  | 503.4258235 | 388.0690964 | 402.6689105 | 520.0696757 | 0.140791174  | 0.323507886 | 0.125886  |
| <b>yceD</b> | gi 49175990 ref NC_000913.2 | + | 1146017 | 1146538 | 7676.889928  | 8790.570128 | 5419.4903   | 5780.926997 | 8717.354548 | 0.276513333  | 6.702063862 | 0.2999977 |
| <b>rpmF</b> | gi 49175990 ref NC_000913.2 | + | 1146590 | 1146763 | 8632.736429  | 10236.20097 | 5765.844824 | 6336.988731 | 9444.232939 | 0.353299714  | 0.930603029 | 0.4525949 |
| <b>plsX</b> | gi 49175990 ref NC_000913.2 | + | 1146844 | 1147914 | 2308.631726  | 2424.888966 | 2284.738068 | 2245.735458 | 2427.333043 | 0.021010827  | 0.050890168 | 0.0085479 |
| <b>fabH</b> | gi 49175990 ref NC_000913.2 | + | 1147982 | 1148935 | 1297.163277  | 1352.547719 | 1823.815707 | 1382.455033 | 1080.776342 | -0.093661594 | 0.180140793 | 0.0573017 |
| <b>fabD</b> | gi 49175990 ref NC_000913.2 | + | 1148951 | 1149880 | 1878.539079  | 1837.871016 | 1981.104573 | 1628.010941 | 1496.676984 | 0.142668523  | 0.235395624 | 0.0836772 |
| <b>fabG</b> | gi 49175990 ref NC_000913.2 | + | 1149893 | 1150627 | 6662.987371  | 7378.183444 | 7577.373282 | 8036.400545 | 8786.3608   | -0.232437982 | 0.42994886  | 0.1762871 |
| <b>acpP</b> | gi 49175990 ref NC_000913.2 | + | 1150838 | 1151074 | 17211.95386  | 19732.40211 | 14188.76007 | 13590.88327 | 20642.59381 | 0.165292609  | 0.36679816  | 0.145076  |
| <b>fabF</b> | gi 49175990 ref NC_000913.2 | + | 1151162 | 1152403 | 5667.014121  | 5639.975582 | 5391.844961 | 4970.228379 | 5848.534753 | 0.06579243   | 0.115465517 | 0.0327284 |
| <b>pabC</b> | gi 49175990 ref NC_000913.2 | + | 1152523 | 1153332 | 246.236084   | 232.656045  | 219.5783803 | 197.3045177 | 167.4165575 | 0.314868878  | 0.70201208  | 0.3141674 |
| <b>yceG</b> | gi 49175990 ref NC_000913.2 | + | 1153335 | 1154357 | 464.5549747  | 441.635368  | 442.5681448 | 374.6189395 | 390.4375589 | 0.185270337  | 0.366909001 | 0.145076  |
| <b>tmk</b>  | gi 49175990 ref NC_000913.2 | + | 1154347 | 1154988 | 417.8694392  | 396.0432288 | 401.9232804 | 286.1369629 | 281.8284993 | 0.357581741  | 0.834814948 | 0.3898479 |
| <b>hoiB</b> | gi 49175990 ref NC_000913.2 | + | 1154985 | 1155989 | 647.721452   | 637.316267  | 566.2150809 | 529.222411  | 516.0936773 | 0.256703568  | 0.614169625 | 0.2718962 |
| <b>yceH</b> | gi 49175990 ref NC_000913.2 | + | 1156000 | 1156797 | 876.286854   | 913.7344602 | 1029.80569  | 1113.218746 | 1073.506909 | -0.269507835 | 0.626626041 | 0.2803477 |
| <b>ptsG</b> | gi 49175990 ref NC_000913.2 | + | 1157092 | 1158525 | 2702.517089  | 2727.85963  | 3988.182938 | 3714.528341 | 4309.53077  | -0.562025601 | 1.884728813 | 1.1142925 |
| <b>fhuE</b> | gi 49175990 ref NC_000913.2 | - | 1158585 | 1160774 | 163.4490083  | 199.5390732 | 146.3746991 | 166.9712224 | 164.8409016 | 0.155068796  | 0.360842335 | 0.1426462 |
| <b>hinT</b> | gi 49175990 ref NC_000913.2 | + | 1161108 | 1161467 | 1313.776896  | 1290.781544 | 1338.938497 | 1039.515032 | 1052.376822 | 0.203226312  | 0.409886581 | 0.1671417 |
| <b>ycfL</b> | gi 49175990 ref NC_000913.2 | + | 1161470 | 1161847 | 1045.747398  | 1182.570283 | 1284.976452 | 1014.932741 | 1194.597743 | -0.073797932 | 0.108429302 | 0.0293547 |
| <b>lpoB</b> | gi 49175990 ref NC_000913.2 | + | 1161861 | 1162502 | 1378.611943  | 1417.1281   | 1549.233125 | 1421.673042 | 1393.300638 | -0.056411929 | 0.095383371 | 0.025393  |
| <b>thiK</b> | gi 49175990 ref NC_000913.2 | + | 1162483 | 1163307 | 556.5472558  | 550.8818851 | 591.1378183 | 571.6493742 | 447.936605  | 0.053617477  | 0.077261839 | 0.0190413 |

|             |                             |   |         |         |             |             |             |             |             |              |             |           |
|-------------|-----------------------------|---|---------|---------|-------------|-------------|-------------|-------------|-------------|--------------|-------------|-----------|
| <b>nagZ</b> | gi 49175990 ref NC_000913.2 | + | 1163318 | 1164343 | 955.801342  | 829.1154325 | 1306.799951 | 1044.977049 | 869.7733404 | -0.230016424 | 0.589436782 | 0.2601007 |
| <b>ycfP</b> | gi 49175990 ref NC_000913.2 | + | 1164366 | 1164908 | 1617.608708 | 1452.206855 | 2623.061494 | 2218.739031 | 1770.548367 | -0.491774679 | 1.460264859 | 0.7982741 |
| <b>ndh</b>  | gi 49175990 ref NC_000913.2 | + | 1165308 | 1166612 | 1831.54056  | 1634.567802 | 1634.826791 | 1503.297951 | 1070.666331 | 0.333934627  | 0.701620739 | 0.3141627 |
| <b>ycfJ</b> | gi 49175990 ref NC_000913.2 | + | 1166822 | 1167361 | 360.043394  | 318.1285309 | 278.7193698 | 269.1835928 | 300.5034988 | 0.277824207  | 0.635548827 | 0.284622  |
| <b>ycfQ</b> | gi 49175990 ref NC_000913.2 | - | 1167423 | 1168055 | 224.3359972 | 199.4074141 | 158.9787889 | 154.6858914 | 140.3605559 | 0.504610492  | 0.635548827 | 0.7982741 |
| <b>bhsA</b> | gi 49175990 ref NC_000913.2 | + | 1168296 | 1168553 | 132.8406649 | 146.3047149 | 77.53885756 | 84.19055585 | 106.2581828 | 0.6222958    | 2.192601023 | 1.3453652 |
| <b>ycfS</b> | gi 49175990 ref NC_000913.2 | - | 1168635 | 1169597 | 132.6779036 | 154.8765135 | 116.5774341 | 109.910522  | 108.8630064 | 0.34594633   | 0.956434268 | 0.4664353 |
| <b>mfd</b>  | gi 49175990 ref NC_000913.2 | - | 1169741 | 1173187 | 1132.955771 | 1028.596514 | 1120.576571 | 980.0041694 | 996.1891691 | 0.086644641  | 0.122078378 | 0.0359921 |
| <b>ycfT</b> | gi 49175990 ref NC_000913.2 | - | 1173315 | 1174388 | 20.33688015 | 28.55935218 | 29.78968174 | 34.83857057 | 46.81946631 | -0.646492859 | 1.200763471 | 0.6212005 |
| <b>loiC</b> | gi 49175990 ref NC_000913.2 | + | 1174650 | 1175849 | 1058.926943 | 1018.17546  | 828.0960466 | 828.6062601 | 909.5914601 | 0.283027239  | 0.712655716 | 0.3184473 |
| <b>loiD</b> | gi 49175990 ref NC_000913.2 | + | 1175842 | 1176543 | 657.0178551 | 623.998287  | 657.2394615 | 546.124979  | 528.5310872 | 0.167759028  | 0.307312483 | 0.1188375 |
| <b>loiE</b> | gi 49175990 ref NC_000913.2 | + | 1176543 | 1177787 | 1198.479544 | 1119.79177  | 1328.620079 | 1111.198021 | 1103.944819 | -0.007888799 | 0.040959012 | 0.0047848 |
| <b>nagK</b> | gi 49175990 ref NC_000913.2 | + | 1177816 | 1177877 | 976.7822773 | 810.0988164 | 1252.90233  | 1060.691688 | 984.0062842 | -0.261807573 | 0.722501332 | 0.3231729 |
| <b>cobB</b> | gi 49175990 ref NC_000913.2 | + | 1178854 | 1179582 | 525.2152601 | 487.2150819 | 707.4176362 | 593.1255267 | 504.0182345 | -0.224835979 | 0.577222561 | 0.2530904 |
| <b>ycfZ</b> | gi 49175990 ref NC_000913.2 | - | 1179702 | 1180490 | 53.65707699 | 37.89665506 | 26.36346004 | 40.44105623 | 61.15445076 | 0.116563601  | 0.121057487 | 0.035482  |
| <b>ymfA</b> | gi 49175990 ref NC_000913.2 | - | 1180487 | 1180948 | 23.78586106 | 40.01144772 | 16.80219516 | 24.75268851 | 38.82804212 | 0.174717554  | 0.29361656  | 0.1132993 |
| <b>potD</b> | gi 49175990 ref NC_000913.2 | - | 1181006 | 1182052 | 1690.728463 | 1550.997365 | 1179.317008 | 1134.63507  | 1130.752862 | 0.511774113  | 1.688251627 | 0.9709883 |
| <b>potC</b> | gi 49175990 ref NC_000913.2 | - | 1182049 | 1182843 | 397.0981477 | 370.3913523 | 402.8886119 | 356.6276037 | 360.1608292 | 0.055786689  | 0.070098256 | 0.0170551 |
| <b>potB</b> | gi 49175990 ref NC_000913.2 | - | 1182840 | 1183667 | 411.5648934 | 389.3938076 | 504.5087977 | 405.9931714 | 386.1130967 | -0.089570794 | 0.197013559 | 0.0647991 |
| <b>pepA</b> | gi 49175990 ref NC_000913.2 | - | 1184817 | 1184817 | 1231.785751 | 1196.744889 | 996.448787  | 926.2510287 | 1092.377852 | 0.276361365  | 0.693214577 | 0.3103556 |
| <b>pepT</b> | gi 49175990 ref NC_000913.2 | + | 1185067 | 1186293 | 1648.130327 | 1655.519804 | 2166.42083  | 1963.300323 | 2222.048966 | -0.35691041  | 0.901863107 | 0.4337119 |
| <b>ycfD</b> | gi 49175990 ref NC_000913.2 | - | 1186342 | 1187463 | 1609.600754 | 1634.629204 | 1782.902644 | 1664.978837 | 1702.821394 | -0.081127203 | 0.139852109 | 0.0418239 |
| <b>phoQ</b> | gi 49175990 ref NC_000913.2 | - | 1187539 | 1188999 | 1545.418541 | 1491.183186 | 1378.265465 | 1474.061277 | 1136.652556 | 0.19933584   | 0.413479579 | 0.1691072 |
| <b>phoP</b> | gi 49175990 ref NC_000913.2 | - | 1188999 | 1189670 | 1331.492001 | 1290.775181 | 1287.28087  | 1571.49076  | 1224.050061 | -0.05532147  | 0.086659134 | 0.0221756 |
| <b>purB</b> | gi 49175990 ref NC_000913.2 | - | 1189839 | 1191209 | 791.3000592 | 778.8339849 | 829.9140646 | 856.2440895 | 568.1314532 | 0.073424213  | 0.11137069  | 0.0306299 |
| <b>hflD</b> | gi 49175990 ref NC_000913.2 | - | 1191213 | 1191854 | 892.4767685 | 825.3456894 | 692.0848138 | 821.7649383 | 903.8481208 | 0.092252427  | 0.17678188  | 0.0559818 |
| <b>mnmA</b> | gi 49175990 ref NC_000913.2 | - | 1191890 | 1192996 | 2597.088812 | 2659.480162 | 2098.829257 | 1866.942967 | 2256.731039 | 0.339111825  | 0.871996343 | 0.4137582 |
| <b>nudJ</b> | gi 49175990 ref NC_000913.2 | - | 1193050 | 1193511 | 1231.106785 | 201.3169019 | 270.7825112 | 142.5820201 | 162.6131669 | 0.430716808  | 1.147541267 | 0.5877497 |
| <b>rluE</b> | gi 49175990 ref NC_000913.2 | - | 1193521 | 1194174 | 259.0122866 | 284.9809766 | 192.9864988 | 224.1752704 | 234.2936047 | 0.3038189    | 0.825906324 | 0.3836046 |
| <b>icd</b>  | gi 49175990 ref NC_000913.2 | + | 1194346 | 1195596 | 4415.425043 | 4021.453716 | 4484.847359 | 4311.727973 | 3118.915335 | 0.110450791  | 0.152121051 | 0.0472209 |
| <b>ymfD</b> | gi 49175990 ref NC_000913.2 | - | 1196090 | 1196755 | 27.18796852 | 25.62818365 | 14.38128621 | 34.53581    | 34.55242656 | -0.096326235 | 0.037108682 | 0.0039338 |
| <b>ymfE</b> | gi 49175990 ref NC_000913.2 | - | 1196756 | 1197460 | 27.01218302 | 19.96900141 | 19.19206279 | 36.6031725  | 21.47575307 | -0.169014061 | 0.187669944 | 0.0607696 |
| <b>lit</b>  | gi 49175990 ref NC_000913.2 | + | 1197918 | 1198811 | 57.98782108 | 58.88866561 | 43.09494854 | 63.62430881 | 50.53908643 | 0.144422492  | 0.229576106 | 0.0808909 |
| <b>intE</b> | gi 49175990 ref NC_000913.2 | - | 1198902 | 1200029 | 75.18630867 | 71.21373968 | 58.06789647 | 83.9701712  | 90.60574226 | -0.092617397 | 0.108615528 | 0.0294058 |
| <b>xisE</b> | gi 49175990 ref NC_000913.2 | - | 1200010 | 1200255 | 12.44187008 | 12.44187008 | 16.91542    | 11.37042281 | 28.76753747 | -0.085330949 | 0           | 0         |
| <b>ymfI</b> | gi 49175990 ref NC_000913.2 | + | 1200720 | 1201061 | 160.1692927 | 164.3234679 | 86.68661891 | 185.5299888 | 152.4283461 | 0.166263779  | 0.327547584 | 0.128073  |
| <b>ymfJ</b> | gi 49175990 ref NC_000913.2 | - | 1200999 | 1201307 | 144.9879115 | 120.5519895 | 80.80987916 | 129.7581974 | 120.9946396 | 0.269750493  | 0.53471987  | 0.2297408 |
| <b>cohE</b> | gi 49175990 ref NC_000913.2 | - | 1201482 | 1202156 | 244.7702708 | 246.9506005 | 130.4430817 | 236.2265036 | 237.4583379 | 0.261346041  | 0.580135124 | 0.254877  |
| <b>croE</b> | gi 49175990 ref NC_000913.2 | + | 1202247 | 1202447 | 13.4974523  | 20.00554235 | 8.329277254 | 10.15586591 | 15.51651845 | 0.508641342  | 0.746784737 | 0.3385405 |
| <b>ymfL</b> | gi 49175990 ref NC_000913.2 | + | 1202491 | 1203048 | 66.15352386 | 51.20984869 | 84.12038772 | 92.00220523 | 109.6836513 | -0.676184734 | 2.169035108 | 1.3280853 |
| <b>ymfM</b> | gi 49175990 ref NC_000913.2 | + | 1203045 | 1203383 | 41.12975277 | 37.96758783 | 69.23315241 | 73.9888419  | 76.22404756 | -0.879339531 | 3.130156311 | 2.120125  |
| <b>ymfQ</b> | gi 49175990 ref NC_000913.2 | + | 1206136 | 1206720 | 2.764658204 | 7.657518245 | 6.527047224 | 8.799241541 | 1.292033949 | -0.159973204 | 0.033286024 | 0.0030156 |
| <b>stfP</b> | gi 49175990 ref NC_000913.2 | + | 1206724 | 1207353 | 13.17137255 | 5.620380004 | 20.24855333 | 9.114499754 | 8.039456655 | -0.307071424 | 0.388754126 | 0.1545033 |
| <b>tfaP</b> | gi 49175990 ref NC_000913.2 | + | 1207355 | 1207768 | 17.36420658 | 21.88226953 | 5.525191609 | 4.607378808 | 11.01750397 | 1.434152424  | 3.183901039 | 2.1650512 |
| <b>tfaE</b> | gi 49175990 ref NC_000913.2 | - | 1207740 | 1208342 | 23.78978994 | 26.61331253 | 12.35648968 | 17.87364809 | 17.88239779 | 0.627778319  | 1.117236461 | 0.5675368 |
| <b>pinE</b> | gi 49175990 ref NC_000913.2 | + | 1208908 | 1209462 | 6.774937048 | 8.564410798 | 6.834797762 | 5.730090759 | 12.1485906  | -0.124889109 | 0.049175328 | 0.0081378 |
| <b>mcrA</b> | gi 49175990 ref NC_000913.2 | + | 1209569 | 1210402 | 41.56261875 | 42.74460069 | 19.65526739 | 32.55589472 | 47.76206189 | 0.311329638  | 0.548210145 | 0.2367121 |
| <b>iraM</b> | gi 49175990 ref NC_000913.2 | - | 1210903 | 1211226 | 5.410322176 | 8.581735411 | 5.525191609 | 4.607378808 | 11.01750397 | -0.055256112 | 0           | 0         |
| <b>ycgX</b> | gi 49175990 ref NC_000913.2 | - | 1211926 | 1212330 | 23.80667731 | 23.80667731 | 13.42205637 | 17.80580892 | 12.43856676 | 0.432489142  | 0.642842775 | 0.2867508 |
| <b>ycgE</b> | gi 49175990 ref NC_000913.2 | - | 1212551 | 1213282 | 892.938069  | 867.1601552 | 780.4420435 | 884.4186388 | 799.8662631 | 0.099553372  | 0.198165886 | 0.0652279 |
| <b>ycfF</b> | gi 49175990 ref NC_000913.2 | - | 1213487 | 1214698 | 401.1670454 | 416.0297527 | 121.7658031 | 365.45167   | 222.2396459 | 0.748079558  | 2.126928485 | 1.2973314 |
| <b>ycgZ</b> | gi 49175990 ref NC_000913.2 | + | 1215012 | 1215248 | 19.15827756 | 15.15618824 | 10.68399449 | 7.989367363 | 14.42954285 | 0.655578307  | 0.849057307 | 0.3972037 |
| <b>ymgC</b> | gi 49175990 ref NC_000913.2 | + | 1215971 | 1216219 | 2.699350544 | 8.62063585  | 9.49234989  | 10.14031546 | 13.36009847 | -1.042573239 | 1.004263161 | 0.4960958 |
| <b>ycgG</b> | gi 49175990 ref NC_000913.2 | + | 1216551 | 1218074 | 53.98155621 | 60.82005985 | 45.75852842 | 60.43324892 | 60.4637982  | 0.023008704  | 0.053763491 | 0.0094608 |
| <b>ymgF</b> | gi 49175990 ref NC_000913.2 | + | 1218206 | 1218424 | 75.84812309 | 92.19562225 | 52.70127967 | 58.54710676 | 98.08337525 | 0.22805622   | 0.477135898 | 0.2008702 |
| <b>ymgD</b> | gi 49175990 ref NC_000913.2 | - | 1221528 | 1221857 | 462.9483357 | 488.223337  | 300.0907969 | 457.2376578 | 498.7576303 | 0.155203833  | 0.360824178 | 0.1426462 |
| <b>ymgG</b> | gi 49175990 ref NC_000913.2 | - | 1221867 | 1222211 | 393.3082211 | 445.5142716 | 238.9739318 | 353.0160622 | 394.4280537 | 0.313458733  | 0.862992096 | 0.4075017 |

|             |                             |   |         |         |             |             |             |             |             |              |             |           |
|-------------|-----------------------------|---|---------|---------|-------------|-------------|-------------|-------------|-------------|--------------|-------------|-----------|
| <b>ymgl</b> | gi 49175990 ref NC_000913.2 | - | 1222213 | 1222386 | 113.4044433 | 151.1287004 | 49.37069113 | 68.67988314 | 132.4965425 | 0.597924527  | 1.548452186 | 0.8638499 |
| <b>minE</b> | gi 49175990 ref NC_000913.2 | - | 1223502 | 1223768 | 766.4830706 | 801.6579925 | 747.2622587 | 740.093165  | 867.9899662 | -0.011912495 | 0           | 0         |
| <b>minD</b> | gi 49175990 ref NC_000913.2 | - | 1223772 | 1224584 | 2314.363836 | 2394.487659 | 2491.203381 | 2199.83253  | 2327.620143 | 0.009304309  | 0.017577264 | 0         |
| <b>minC</b> | gi 49175990 ref NC_000913.2 | - | 1224608 | 1225303 | 1613.286598 | 1685.932824 | 2057.72294  | 1866.909803 | 2197.306092 | -0.312532549 | 0.716217127 | 0.3190229 |
| <b>ycgJ</b> | gi 49175990 ref NC_000913.2 | + | 1225823 | 1226191 | 121.5315869 | 104.4194049 | 81.42654036 | 116.1487164 | 76.54869718 | 0.317894984  | 0.660220287 | 0.2968642 |
| <b>pliG</b> | gi 49175990 ref NC_000913.2 | - | 1226294 | 1226695 | 234.2667838 | 269.8035503 | 157.4068494 | 228.2957292 | 178.466456  | 0.391460736  | 1.114060397 | 0.5667635 |
| <b>ycgL</b> | gi 49175990 ref NC_000913.2 | + | 1226937 | 1227230 | 231.6664587 | 273.613849  | 151.4513937 | 149.2151213 | 170.351276  | 0.660957857  | 2.532170016 | 1.6315256 |
| <b>ycgM</b> | gi 49175990 ref NC_000913.2 | + | 1227302 | 1227961 | 353.6064586 | 324.7940205 | 302.3905884 | 302.6686962 | 281.6627444 | 0.212073705  | 0.440503424 | 0.1808157 |
| <b>ycgN</b> | gi 49175990 ref NC_000913.2 | + | 1228038 | 1228499 | 172.6720872 | 184.2859428 | 175.0407164 | 174.8677941 | 163.865347  | 0.052760763  | 0.09611917  | 0.0257826 |
| <b>hlyE</b> | gi 49175990 ref NC_000913.2 | - | 1228706 | 1229617 | 16.41800601 | 26.68255645 | 25.53726972 | 92.02458592 | 42.90318504 | -1.389477405 | 2.730605571 | 1.7982981 |
| <b>umuD</b> | gi 49175990 ref NC_000913.2 | + | 1229990 | 1230409 | 126.3587483 | 148.2292223 | 67.79869956 | 53.04478803 | 88.21186551 | 0.955184027  | 4.063908585 | 2.9118761 |
| <b>umuC</b> | gi 49175990 ref NC_000913.2 | + | 1230409 | 1231677 | 221.5478212 | 214.6398997 | 150.9427577 | 147.9170661 | 125.8447003 | 0.632237778  | 2.167070365 | 1.3280853 |
| <b>dsbB</b> | gi 49175990 ref NC_000913.2 | - | 1231723 | 1232253 | 610.4865619 | 665.8543554 | 632.1957241 | 640.3996075 | 857.6552738 | -0.174597351 | 0.302468641 | 0.1162915 |
| <b>nhaB</b> | gi 49175990 ref NC_000913.2 | - | 1232399 | 1233940 | 1019.493436 | 1072.357286 | 822.6475148 | 729.0215782 | 937.4795703 | 0.326243264  | 0.894337011 | 0.4283737 |
| <b>fadR</b> | gi 49175990 ref NC_000913.2 | + | 1234161 | 1234880 | 871.4033122 | 866.2212909 | 1051.335299 | 1151.432273 | 1261.745561 | -0.416524567 | 1.191811053 | 0.6165251 |
| <b>ycgB</b> | gi 49175990 ref NC_000913.2 | - | 1234932 | 1236464 | 742.6888876 | 736.0957213 | 969.7329154 | 1225.854273 | 653.5255357 | -0.35826513  | 0.819261963 | 0.3793157 |
| <b>dadA</b> | gi 49175990 ref NC_000913.2 | + | 1236794 | 1238092 | 533.4646349 | 488.158727  | 436.4174165 | 345.3585416 | 273.0461506 | 0.569177207  | 1.706394863 | 0.9852214 |
| <b>dadX</b> | gi 49175990 ref NC_000913.2 | + | 1238102 | 1239172 | 370.9865031 | 372.3235787 | 317.4143425 | 261.2931925 | 228.0261699 | 0.479587085  | 1.399384902 | 0.7607065 |
| <b>cvrA</b> | gi 49175990 ref NC_000913.2 | - | 1239558 | 1241294 | 1193.926325 | 1159.702138 | 1330.870431 | 1417.0426   | 1337.158637 | -0.208057036 | 0.466158961 | 0.1954443 |
| <b>ldcA</b> | gi 49175990 ref NC_000913.2 | - | 1241389 | 1242303 | 267.6787826 | 310.6498417 | 337.792412  | 277.1388023 | 309.5982644 | -0.105026625 | 0.156653632 | 0.0467535 |
| <b>emtA</b> | gi 49175990 ref NC_000913.2 | + | 1242403 | 1243014 | 301.5730839 | 302.9877568 | 275.7767057 | 253.4825644 | 268.0862932 | 0.18788559   | 0.396311437 | 0.1585723 |
| <b>ycgR</b> | gi 49175990 ref NC_000913.2 | - | 1243016 | 1243750 | 462.391601  | 476.815289  | 649.2297423 | 744.308821  | 707.8010058 | -0.586528584 | 2.054666002 | 1.2413259 |
| <b>ymgE</b> | gi 49175990 ref NC_000913.2 | + | 1243951 | 1244205 | 68.08436273 | 90.32523841 | 105.4656898 | 116.1419461 | 52.2461104  | -0.228823846 | 0.302076786 | 0.1160633 |
| <b>ycgY</b> | gi 49175990 ref NC_000913.2 | + | 1244383 | 1244823 | 20.97525259 | 18.01598722 | 16.08011305 | 21.15033918 | 14.69752257 | 0.184022373  | 0.155476678 | 0.0487535 |
| <b>treA</b> | gi 49175990 ref NC_000913.2 | - | 1244902 | 1246599 | 666.4597077 | 637.2987693 | 892.6612822 | 934.8378338 | 745.1318388 | -0.386065119 | 1.153228645 | 0.5905891 |
| <b>dhaM</b> | gi 49175990 ref NC_000913.2 | - | 1246919 | 1248337 | 3503.844407 | 3581.74655  | 2424.170965 | 1429.257189 | 3684.867932 | 0.489771154  | 1.120169993 | 0.5686948 |
| <b>dhaL</b> | gi 49175990 ref NC_000913.2 | - | 1248348 | 1248980 | 1822.470175 | 1738.128627 | 951.7242306 | 607.3957984 | 1517.669946 | 0.796939593  | 2.417014615 | 1.5321947 |
| <b>dhaK</b> | gi 49175990 ref NC_000913.2 | - | 1248991 | 1250061 | 3044.202974 | 2814.250257 | 1311.174608 | 780.1160674 | 2076.243419 | 1.083281121  | 3.688542455 | 2.5958239 |
| <b>dhaR</b> | gi 49175990 ref NC_000913.2 | + | 1250289 | 1252208 | 298.5078942 | 291.5777197 | 219.1151646 | 254.2610094 | 206.5851985 | 0.381239271  | 1.045095291 | 0.5211846 |
| <b>ycgV</b> | gi 49175990 ref NC_000913.2 | - | 1252308 | 1255175 | 281.3029119 | 289.7011822 | 297.8957614 | 347.5161927 | 373.3341858 | -0.263160916 | 0.568878655 | 0.2488581 |
| <b>ychF</b> | gi 49175990 ref NC_000913.2 | - | 1255944 | 1257035 | 1454.309748 | 1504.513866 | 895.262643  | 1004.715585 | 1344.392765 | 0.43397754   | 1.310474589 | 0.7014279 |
| <b>pth</b>  | gi 49175990 ref NC_000913.2 | - | 1257152 | 1257736 | 173.5253259 | 212.8392569 | 144.738967  | 140.2458631 | 158.0423623 | 0.358806387  | 0.995449879 | 0.4899061 |
| <b>ychH</b> | gi 49175990 ref NC_000913.2 | + | 1258014 | 1258292 | 2303.40478  | 2546.489856 | 4535.188198 | 4917.322461 | 5134.054037 | -1.023388644 | 4.843235782 | 3.5893472 |
| <b>ychM</b> | gi 49175990 ref NC_000913.2 | - | 1258347 | 1260026 | 606.4838512 | 585.0632504 | 654.350342  | 613.4985275 | 780.4091994 | -0.194578332 | 0.425495354 | 0.1743904 |
| <b>prs</b>  | gi 49175990 ref NC_000913.2 | - | 1260151 | 1261098 | 3815.238398 | 3576.005774 | 3456.374031 | 3173.114094 | 4138.840688 | 0.048550891  | 0.072798143 | 0.017494  |
| <b>ispE</b> | gi 49175990 ref NC_000913.2 | - | 1261249 | 1262100 | 3717.994466 | 4247.619147 | 4316.946481 | 3093.817799 | 5070.837911 | -0.07935481  | 0.093622578 | 0.024853  |
| <b>lolB</b> | gi 49175990 ref NC_000913.2 | - | 1262100 | 1262723 | 685.3704015 | 659.1470508 | 606.0417569 | 562.8795034 | 563.1747465 | 0.228862092  | 0.520634799 | 0.2226309 |
| <b>hemA</b> | gi 49175990 ref NC_000913.2 | + | 1262937 | 1264193 | 1498.01285  | 1478.846522 | 1265.820856 | 1204.264155 | 1389.65176  | 0.210891276  | 0.481407272 | 0.202515  |
| <b>prfA</b> | gi 49175990 ref NC_000913.2 | + | 1264235 | 1265317 | 1432.976045 | 1432.311677 | 1130.534023 | 1051.847163 | 1287.496491 | 0.30712358   | 0.804599537 | 0.3710658 |
| <b>prmC</b> | gi 49175990 ref NC_000913.2 | + | 1265317 | 1266150 | 821.5293943 | 822.5333279 | 863.4101723 | 709.9922001 | 890.4734553 | 0.005145036  | 0.004373591 | 0         |
| <b>ychQ</b> | gi 49175990 ref NC_000913.2 | + | 1266147 | 1266539 | 394.7457661 | 349.4727088 | 369.384851  | 404.7564977 | 447.3659218 | -0.119934745 | 0.244020007 | 0.088798  |
| <b>ychA</b> | gi 49175990 ref NC_000913.2 | + | 1266543 | 1267352 | 668.1020321 | 687.672951  | 592.0246837 | 627.8274535 | 643.8041141 | 0.118341056  | 0.260493223 | 0.0958716 |
| <b>kdsA</b> | gi 49175990 ref NC_000913.2 | + | 1267388 | 1268242 | 1612.572537 | 1725.836449 | 1347.696052 | 1134.876668 | 1385.178131 | 0.326376592  | 1.043353571 | 0.5210963 |
| <b>ldrA</b> | gi 49175990 ref NC_000913.2 | - | 1268391 | 1268498 | 119.69152   | 127.2940278 | 120.3320088 | 135.8217662 | 187.9411633 | -0.282026009 | 0.516364353 | 0.22137   |
| <b>ldrB</b> | gi 49175990 ref NC_000913.2 | - | 1268926 | 1269033 | 37.11229544 | 38.95016846 | 32.04975031 | 26.04354397 | 44.53734544 | 0.144501839  | 0.18252248  | 0.0582503 |
| <b>ldrC</b> | gi 49175990 ref NC_000913.2 | - | 1269461 | 1269568 | 106.8538359 | 123.5261308 | 104.1803497 | 121.1050332 | 139.9561325 | -0.107887234 | 0.120836138 | 0.035482  |
| <b>chaA</b> | gi 49175990 ref NC_000913.2 | - | 1269972 | 1271072 | 1065.252983 | 1224.369901 | 903.7946505 | 899.278326  | 1034.03309  | 0.252259809  | 0.688700088 | 0.3091873 |
| <b>chaB</b> | gi 49175990 ref NC_000913.2 | + | 1271342 | 1271572 | 169.1286218 | 166.2057512 | 145.7377659 | 231.6062976 | 182.895459  | -0.168650854 | 0.264757881 | 0.0969652 |
| <b>chaC</b> | gi 49175990 ref NC_000913.2 | + | 1271730 | 1272425 | 435.1305193 | 385.5655019 | 532.236235  | 448.4635952 | 362.7287578 | -0.094996195 | 0.226951469 | 0.0791779 |
| <b>ychN</b> | gi 49175990 ref NC_000913.2 | - | 1272469 | 1272822 | 595.3706799 | 644.0047336 | 912.6597918 | 942.7580279 | 815.6985274 | -0.531946807 | 1.80666945  | 1.057093  |
| <b>ychO</b> | gi 49175990 ref NC_000913.2 | + | 1273007 | 1274401 | 456.357519  | 433.0863101 | 535.7440526 | 406.2979925 | 593.0484052 | -0.1913731   | 0.422369462 | 0.1730485 |
| <b>narL</b> | gi 49175990 ref NC_000913.2 | - | 1274402 | 1275052 | 1193.106513 | 1223.365253 | 1446.643079 | 764.3502748 | 1619.151483 | -0.072712166 | 0.111034146 | 0.0304217 |
| <b>narX</b> | gi 49175990 ref NC_000913.2 | - | 1275045 | 1276841 | 1417.244668 | 1399.062327 | 1104.212979 | 719.4740609 | 1691.625674 | 0.262591293  | 0.490667149 | 0.2079073 |
| <b>narK</b> | gi 49175990 ref NC_000913.2 | + | 1277180 | 1278571 | 11268.18903 | 10034.70087 | 9379.278706 | 1007.166355 | 11199.11291 | 0.060675291  | 0.633016231 | 0.2835224 |
| <b>narG</b> | gi 49175990 ref NC_000913.2 | + | 1279087 | 1282830 | 27311.89457 | 25338.08712 | 32368.87169 | 2849.147722 | 40438.10048 | 0.095383658  | 0.052544912 | 0.0090435 |
| <b>narH</b> | gi 49175990 ref NC_000913.2 | + | 1282827 | 1284365 | 6514.268165 | 5724.449016 | 18724.11573 | 1986.978529 | 11241.89621 | -0.720233003 | 1.03395309  | 0.5178105 |
| <b>narJ</b> | gi 49175990 ref NC_000913.2 | + | 1284362 | 1285072 | 2720.069393 | 2377.310395 | 8365.86398  | 1180.841627 | 5655.514359 | -0.920325015 | 1.635308232 | 0.9295682 |

|             |                             |   |         |         |             |             |             |             |             |              |             |           |
|-------------|-----------------------------|---|---------|---------|-------------|-------------|-------------|-------------|-------------|--------------|-------------|-----------|
| <b>narI</b> | gi 49175990 ref NC_000913.2 | + | 1285072 | 1285749 | 3425.89596  | 3223.627519 | 12671.47291 | 2179.749115 | 8979.176544 | -1.200280819 | 2.597229919 | 1.6819207 |
| <b>trp</b>  | gi 49175990 ref NC_000913.2 | - | 1286310 | 1286399 | 534.6056106 | 420.6560551 | 331.6494296 | 597.7505934 | 1012.705682 | -0.442444454 | 0.787640986 | 0.3620573 |
| <b>purU</b> | gi 49175990 ref NC_000913.2 | - | 1287005 | 1287847 | 657.0652802 | 615.4436262 | 388.6300215 | 552.4694562 | 539.3583957 | 0.3598068    | 0.979118547 | 0.4786629 |
| <b>ychJ</b> | gi 49175990 ref NC_000913.2 | - | 1287897 | 1288355 | 734.4960415 | 874.8553897 | 797.4988507 | 838.5530283 | 800.9599439 | -0.040023301 | 0.018117401 | 0         |
| <b>rssA</b> | gi 49175990 ref NC_000913.2 | + | 1288468 | 1289373 | 924.6324774 | 861.4419191 | 1721.213195 | 1657.948277 | 1142.469142 | -0.733957529 | 2.786501134 | 1.8383994 |
| <b>rssB</b> | gi 49175990 ref NC_000913.2 | + | 1289465 | 1290478 | 653.6982014 | 651.5651197 | 801.6476655 | 957.1479154 | 762.9953075 | -0.368152082 | 1.033198401 | 0.5177551 |
| <b>galU</b> | gi 49175990 ref NC_000913.2 | + | 1290680 | 1291588 | 1494.144113 | 1510.20158  | 1410.360117 | 2042.453069 | 2018.879205 | -0.298975537 | 0.603455357 | 0.2674799 |
| <b>hns</b>  | gi 49175990 ref NC_000913.2 | - | 1291732 | 1292145 | 6222.254742 | 6264.007479 | 3848.592503 | 7157.185407 | 8725.171971 | -0.108194916 | 0.097967385 | 0.0262976 |
| <b>tdk</b>  | gi 49175990 ref NC_000913.2 | + | 1292750 | 1293367 | 180.4877517 | 219.4847321 | 122.5763013 | 102.4678436 | 184.421723  | 0.517535015  | 1.463319483 | 0.7989872 |
| <b>adhE</b> | gi 49175990 ref NC_000913.2 | - | 1294669 | 1297344 | 9641.042048 | 9653.882966 | 25342.63311 | 30945.07254 | 14620.40235 | -1.287370927 | 5.147026429 | 3.8593313 |
| <b>ychE</b> | gi 49175990 ref NC_000913.2 | + | 1297821 | 1298468 | 242.0576784 | 211.74792   | 306.0725383 | 281.43891   | 265.9942933 | -0.302582649 | 0.815105533 | 0.3775021 |
| <b>oppA</b> | gi 49175990 ref NC_000913.2 | + | 1299206 | 1300837 | 358.6632621 | 328.5921002 | 321.7099524 | 365.479621  | 396.8914148 | -0.068577372 | 0.122372618 | 0.0360746 |
| <b>oppB</b> | gi 49175990 ref NC_000913.2 | + | 1300923 | 1301843 | 66.80154434 | 68.38965661 | 58.71957429 | 75.97100951 | 57.36823314 | 0.070877798  | 0.10565675  | 0.0283572 |
| <b>oppC</b> | gi 49175990 ref NC_000913.2 | + | 1301858 | 1302766 | 115.7352236 | 131.117667  | 133.7028119 | 133.310522  | 109.0456611 | -0.033419466 | 0.021586493 | 0.0002799 |
| <b>oppD</b> | gi 49175990 ref NC_000913.2 | + | 1302778 | 1303791 | 149.6785202 | 112.9184419 | 156.8963072 | 127.8550498 | 106.8902901 | 0.05805722   | 0.01009936  | 0         |
| <b>oppF</b> | gi 49175990 ref NC_000913.2 | + | 1303788 | 1304792 | 166.9583891 | 145.2622238 | 186.3666122 | 161.4768103 | 142.7057574 | -0.038597138 | 0.095008161 | 0.0251728 |
| <b>yciU</b> | gi 49175990 ref NC_000913.2 | - | 1304845 | 1305174 | 248.0901197 | 193.6558583 | 301.4115063 | 241.1416148 | 213.4426555 | -0.142858471 | 0.361923664 | 0.1431209 |
| <b>cls</b>  | gi 49175990 ref NC_000913.2 | - | 1305209 | 1306669 | 1225.846693 | 1283.213315 | 1508.109665 | 1386.914279 | 1356.284905 | -0.177338038 | 0.367788747 | 0.145076  |
| <b>yciY</b> | gi 49175990 ref NC_000913.2 | + | 1306812 | 1306985 | 1953.574767 | 1940.457943 | 2792.353036 | 4872.323099 | 5918.64539  | -1.246133482 | 4.97341228  | 3.7078901 |
| <b>kch</b>  | gi 49175990 ref NC_000913.2 | - | 1307040 | 1308293 | 206.4901429 | 239.4114878 | 155.333798  | 240.8194351 | 249.831849  | 0.010138993  | 0.075752184 | 0.0183319 |
| <b>yciI</b> | gi 49175990 ref NC_000913.2 | - | 1308593 | 1308889 | 629.221024  | 727.61989   | 742.3317382 | 662.6302099 | 604.8383803 | 0.005803014  | 0.032233272 | 0.0030156 |
| <b>tonB</b> | gi 49175990 ref NC_000913.2 | + | 1309113 | 1309832 | 204.1563609 | 222.2876557 | 103.9537156 | 116.5858144 | 124.3783028 | 0.872793198  | 3.917729434 | 2.7849363 |
| <b>yciA</b> | gi 49175990 ref NC_000913.2 | - | 1309872 | 1310270 | 197.2890479 | 169.9518217 | 139.6754972 | 148.0272175 | 162.5052455 | 0.305950017  | 0.664173274 | 0.2977686 |
| <b>yciB</b> | gi 49175990 ref NC_000913.2 | - | 1310375 | 1310914 | 373.4663108 | 379.9281521 | 418.9185968 | 395.7694482 | 370.3152312 | -0.066151407 | 0.117074963 | 0.0329825 |
| <b>yciC</b> | gi 49175990 ref NC_000913.2 | - | 1310944 | 1311687 | 670.9014012 | 767.5070593 | 780.4446651 | 838.5804932 | 846.8506177 | -0.215608823 | 0.428952658 | 0.1756893 |
| <b>ompW</b> | gi 49175990 ref NC_000913.2 | + | 1312044 | 1312682 | 203.7620469 | 205.1579269 | 1513.058119 | 2156.73408  | 380.4776599 | -2.714319231 | 9.396729974 | 7.6511993 |
| <b>yciE</b> | gi 49175990 ref NC_000913.2 | - | 1312742 | 1313248 | 22.38595    | 17.04614356 | 32.36213476 | 65.29923269 | 18.48994256 | -0.954106998 | 1.769058191 | 1.0318826 |
| <b>yciF</b> | gi 49175990 ref NC_000913.2 | - | 1313294 | 1313794 | 6.629690701 | 10.48804508 | 8.329239497 | 20.83790351 | 4.75317173  | -0.450100678 | 0.313044327 | 0.1222592 |
| <b>yciG</b> | gi 49175990 ref NC_000913.2 | - | 1313880 | 1314059 | 21.11181143 | 26.63692009 | 20.36184391 | 32.25576395 | 22.53715715 | -0.101424614 | 0.032889073 | 0.0030156 |
| <b>trpA</b> | gi 49175990 ref NC_000913.2 | - | 1314440 | 1315246 | 223.6666108 | 201.3121232 | 335.4080586 | 306.1701875 | 317.4750323 | -0.571148758 | 2.006290876 | 1.2045874 |
| <b>trpB</b> | gi 49175990 ref NC_000913.2 | - | 1315246 | 1316439 | 252.854218  | 216.487883  | 424.6534857 | 337.5497488 | 288.657181  | -0.540939015 | 1.798164085 | 1.0521671 |
| <b>trpC</b> | gi 49175990 ref NC_000913.2 | - | 1316451 | 1317809 | 198.1269208 | 196.6035686 | 266.128326  | 248.8394682 | 208.9182493 | -0.281057402 | 0.658573874 | 0.295896  |
| <b>trpD</b> | gi 49175990 ref NC_000913.2 | - | 1317813 | 1319408 | 120.6280154 | 144.4376158 | 133.2403023 | 148.0241124 | 168.0390718 | -0.20704465  | 0.316842581 | 0.1239013 |
| <b>trpE</b> | gi 49175990 ref NC_000913.2 | - | 1319408 | 1320970 | 37.63927887 | 41.81478486 | 47.59900893 | 39.40169053 | 48.15619639 | -0.188041789 | 0.268925185 | 0.0994014 |
| <b>trpL</b> | gi 49175990 ref NC_000913.2 | - | 1321062 | 1321106 | 6.700927531 | 9.526263889 | 6.984580103 | 11.1581928  | 11.16357507 | -0.304237201 | 0.16400597  | 0.0518508 |
| <b>yciV</b> | gi 49175990 ref NC_000913.2 | + | 1321244 | 1322125 | 591.5632961 | 644.0077364 | 763.4770971 | 930.3322111 | 844.6802033 | -0.473227502 | 1.437371255 | 0.7820287 |
| <b>yciO</b> | gi 49175990 ref NC_000913.2 | + | 1322122 | 1322742 | 474.0958825 | 532.8941123 | 612.6671278 | 572.9523595 | 563.1952125 | -0.223831256 | 0.466819099 | 0.1956901 |
| <b>yciQ</b> | gi 49175990 ref NC_000913.2 | + | 1322770 | 1324665 | 358.3722752 | 359.025416  | 400.4253691 | 367.8264679 | 379.1744363 | -0.08916703  | 0.166282503 | 0.0525902 |
| <b>riuB</b> | gi 49175990 ref NC_000913.2 | + | 1324876 | 1325751 | 1224.01978  | 1050.41607  | 1095.93929  | 1118.8789   | 1093.719808 | 0.065501672  | 0.080697905 | 0.0203997 |
| <b>btuR</b> | gi 49175990 ref NC_000913.2 | - | 1325791 | 1326381 | 191.0332249 | 199.4741846 | 166.3212456 | 171.6597325 | 209.4810862 | 0.085660804  | 0.169218038 | 0.0533084 |
| <b>yciK</b> | gi 49175990 ref NC_000913.2 | - | 1326378 | 1327136 | 230.5997686 | 255.5393427 | 251.1906744 | 263.5412053 | 300.4134164 | -0.179971001 | 0.310750256 | 0.1211217 |
| <b>sohB</b> | gi 49175990 ref NC_000913.2 | + | 1327356 | 1328405 | 890.8310192 | 767.3746846 | 987.5476184 | 982.9360364 | 622.0513793 | -0.027789188 | 0.091837455 | 0.0238778 |
| <b>yciN</b> | gi 49175990 ref NC_000913.2 | - | 1328441 | 1328692 | 1801.428039 | 2659.659684 | 1902.229493 | 2019.451857 | 2920.324099 | -0.101456087 | 0.04009667  | 0.0045376 |
| <b>topA</b> | gi 49175990 ref NC_000913.2 | + | 1329072 | 1331669 | 3540.182204 | 3262.559845 | 3109.729065 | 2854.586601 | 3165.448878 | 0.173986781  | 0.338696127 | 0.1335511 |
| <b>cysB</b> | gi 49175990 ref NC_000913.2 | + | 1331879 | 1332853 | 921.6045685 | 993.5345642 | 627.3938154 | 854.1126594 | 864.6253875 | 0.266306567  | 0.74072402  | 0.3343714 |
| <b>ymiA</b> | gi 49175990 ref NC_000913.2 | + | 1333184 | 1333312 | 129.5215831 | 120.5947641 | 224.9061625 | 263.4252843 | 281.3651254 | -1.035767949 | 4.661977985 | 3.4340806 |
| <b>yciX</b> | gi 49175990 ref NC_000913.2 | + | 1333315 | 1333482 | 138.0129145 | 145.3372517 | 208.199734  | 328.0475313 | 272.5708921 | -0.951015835 | 3.60223818  | 2.5263499 |
| <b>acnA</b> | gi 49175990 ref NC_000913.2 | + | 1333855 | 1336530 | 1814.319792 | 1704.878174 | 2954.756394 | 2827.211881 | 1682.197025 | -0.476204117 | 1.247242135 | 0.654824  |
| <b>ribA</b> | gi 49175990 ref NC_000913.2 | - | 1336594 | 1337184 | 739.5059253 | 738.9489676 | 705.374123  | 815.109248  | 954.242661  | -0.169087579 | 0.320880356 | 0.1253096 |
| <b>pgpB</b> | gi 49175990 ref NC_000913.2 | + | 1337354 | 1338118 | 391.5368349 | 352.3292573 | 498.1755183 | 465.1890544 | 373.887818  | -0.237652187 | 0.602544029 | 0.2674799 |
| <b>yciS</b> | gi 49175990 ref NC_000913.2 | + | 1338267 | 1338575 | 730.0881733 | 867.255575  | 846.6459967 | 861.0746114 | 905.159892  | -0.15168164  | 0.24643314  | 0.0901954 |
| <b>yciM</b> | gi 49175990 ref NC_000913.2 | + | 1338582 | 1339751 | 847.9585806 | 867.1844691 | 921.7918117 | 889.0481882 | 822.3827325 | -0.03282277  | 0.052359081 | 0.0090435 |
| <b>pyrF</b> | gi 49175990 ref NC_000913.2 | + | 1339945 | 1340682 | 474.4132018 | 484.4092866 | 375.8699262 | 377.9662908 | 454.0316367 | 0.24401085   | 0.60792437  | 0.2691543 |
| <b>yciH</b> | gi 49175990 ref NC_000913.2 | + | 1340682 | 1341008 | 99.87619524 | 92.09869271 | 72.71880786 | 67.2931443  | 64.0340294  | 0.511451601  | 1.417872137 | 0.7708004 |
| <b>osmB</b> | gi 49175990 ref NC_000913.2 | - | 1341134 | 1341352 | 183.5796221 | 184.2607328 | 138.2634285 | 156.8300913 | 142.5135676 | 0.330347017  | 0.82740669  | 0.3845141 |
| <b>yciT</b> | gi 49175990 ref NC_000913.2 | - | 1341621 | 1342370 | 421.9733374 | 439.7773686 | 296.9131202 | 364.3847631 | 432.5910059 | 0.221302194  | 0.542278676 | 0.2332111 |
| <b>yciZ</b> | gi 49175990 ref NC_000913.2 | - | 1342460 | 1342633 | 241.1892763 | 279.3043176 | 289.8356067 | 279.4565583 | 402.1839345 | -0.342894525 | 0.719940464 | 0.3221157 |

|             |                             |   |         |         |              |             |             |             |             |              |             |           |
|-------------|-----------------------------|---|---------|---------|--------------|-------------|-------------|-------------|-------------|--------------|-------------|-----------|
| <b>gmr</b>  | gi 49175990 ref NC_000913.2 | - | 1342781 | 1344766 | 495.9569602  | 492.9452888 | 286.1084336 | 394.2867733 | 330.9614427 | 0.542138055  | 1.894558004 | 1.1216003 |
| <b>ymiB</b> | gi 49175990 ref NC_000913.2 | + | 1344820 | 1344924 | 32.75663764  | 33.24245458 | 23.11751378 | 34.58636251 | 30.2684094  | 0.157613393  | 0.211208096 | 0.0721266 |
| <b>rnb</b>  | gi 49175990 ref NC_000913.2 | - | 1345002 | 1346936 | 1140.826682  | 1138.819232 | 740.9311645 | 745.7783612 | 981.0786754 | 0.463240432  | 1.462940897 | 0.7989872 |
| <b>yciW</b> | gi 49175990 ref NC_000913.2 | - | 1347004 | 1348131 | 174.8729794  | 168.0964383 | 101.5094581 | 135.4090815 | 117.800789  | 0.531759296  | 1.639918285 | 0.9330939 |
| <b>fabI</b> | gi 49175990 ref NC_000913.2 | - | 1348275 | 1349063 | 2552.140515  | 2725.037516 | 2033.471849 | 171.46805   | 1969.696719 | 0.465042523  | 1.408943465 | 0.7651708 |
| <b>ycjD</b> | gi 49175990 ref NC_000913.2 | - | 1349431 | 1349784 | 82.90423669  | 74.04334404 | 113.205229  | 98.59154158 | 71.06686843 | -0.237140949 | 0.505711053 | 0.215207  |
| <b>sapF</b> | gi 49175990 ref NC_000913.2 | - | 1349852 | 1350658 | 312.085652   | 335.3111665 | 243.0158863 | 262.2761363 | 251.2862093 | 0.347598318  | 0.992197415 | 0.4877932 |
| <b>sapD</b> | gi 49175990 ref NC_000913.2 | - | 1350660 | 1351652 | 559.267332   | 522.3610694 | 519.6137055 | 503.2974953 | 417.5737484 | 0.187417219  | 0.371090479 | 0.1454249 |
| <b>sapC</b> | gi 49175990 ref NC_000913.2 | - | 1351652 | 1352542 | 260.6591671  | 253.5836784 | 287.2829499 | 266.7690164 | 219.0470123 | 0.009068158  | 0           | 0         |
| <b>sapB</b> | gi 49175990 ref NC_000913.2 | - | 1352529 | 1353494 | 333.782231   | 332.428075  | 274.4600479 | 246.8004859 | 273.6450056 | 0.333418181  | 0.879066    | 0.4176149 |
| <b>sapA</b> | gi 49175990 ref NC_000913.2 | - | 1353491 | 1355134 | 715.301102   | 635.3653552 | 680.0442046 | 549.6162083 | 629.2677744 | 0.148312946  | 0.249591788 | 0.0910032 |
| <b>ymiA</b> | gi 49175990 ref NC_000913.2 | - | 1355447 | 1355692 | 206.8798985  | 210.8169408 | 163.2056325 | 241.9796686 | 255.4395486 | -0.097350275 | 0.107416992 | 0.0428537 |
| <b>puuP</b> | gi 49175990 ref NC_000913.2 | - | 1355826 | 1357211 | 88.36479889  | 86.42081586 | 68.3632269  | 78.55457819 | 98.39257544 | 0.088266024  | 0.142616856 | 0.0287363 |
| <b>puuA</b> | gi 49175990 ref NC_000913.2 | - | 1357514 | 1358932 | 191.947383   | 182.3385607 | 137.0686172 | 139.1522839 | 170.239751  | 0.331927034  | 0.792852832 | 0.3644962 |
| <b>puuD</b> | gi 49175990 ref NC_000913.2 | + | 1359144 | 1359908 | 235.9947503  | 233.6451849 | 176.2380903 | 154.8774516 | 173.8152611 | 0.485154252  | 1.455896508 | 0.7962891 |
| <b>puuR</b> | gi 49175990 ref NC_000913.2 | + | 1359935 | 1360492 | 123.9670499  | 138.711948  | 97.99634953 | 89.76841404 | 93.12218089 | 0.476878085  | 1.459276495 | 0.7977751 |
| <b>puuC</b> | gi 49175990 ref NC_000913.2 | + | 1360767 | 1362254 | 20.30269746  | 18.02173311 | 36.39733818 | 19.35297749 | 29.14118961 | -0.531126573 | 0.806888305 | 0.418141  |
| <b>puuB</b> | gi 49175990 ref NC_000913.2 | + | 1362256 | 1363536 | 12.9972439   | 7.539204589 | 14.87448603 | 15.76814651 | 21.15959884 | -0.703043962 | 1.042874637 | 0.5210963 |
| <b>puuE</b> | gi 49175990 ref NC_000913.2 | + | 1363574 | 1364839 | 58.63314237  | 43.60465769 | 59.64955236 | 56.12095393 | 59.43652841 | -0.156678206 | 0.303173739 | 0.1166828 |
| <b>pspF</b> | gi 49175990 ref NC_000913.2 | - | 1364959 | 1365936 | 182.5993162  | 206.1555605 | 253.3836365 | 238.9124568 | 261.2912373 | -0.385161177 | 0.959937173 | 0.4669512 |
| <b>pspA</b> | gi 49175990 ref NC_000913.2 | + | 1366103 | 1366771 | 620.2650653  | 616.4207241 | 404.9521589 | 647.711624  | 648.0496138 | 0.104632281  | 0.22544996  | 0.0787822 |
| <b>pspB</b> | gi 49175990 ref NC_000913.2 | + | 1366825 | 1367049 | 94.21526776  | 110.2316332 | 75.40786911 | 95.40205657 | 131.8360234 | -0.017532617 | 0.024820625 | 0.0005477 |
| <b>pspC</b> | gi 49175990 ref NC_000913.2 | + | 1367049 | 1367408 | 138.6194459  | 147.2403264 | 130.3645269 | 146.7841362 | 141.325149  | 0.023032332  | 0.050066738 | 0.0082424 |
| <b>pspD</b> | gi 49175990 ref NC_000913.2 | + | 1367417 | 1367638 | 50.4031741   | 69.43253595 | 79.68083458 | 45.18981304 | 56.18886481 | -0.027596425 | 0           | 0         |
| <b>pspE</b> | gi 49175990 ref NC_000913.2 | + | 1367713 | 1368027 | 530.8057808  | 610.7900924 | 1438.230756 | 1437.331634 | 1463.845288 | -1.361582411 | 8.539959154 | 6.869564  |
| <b>ycjM</b> | gi 49175990 ref NC_000913.2 | + | 1368240 | 1369919 | 79.34857533  | 83.59697773 | 87.96344161 | 155.6590582 | 178.9750021 | -0.821605324 | 2.276648162 | 1.4155241 |
| <b>ycjN</b> | gi 49175990 ref NC_000913.2 | + | 1369933 | 1371225 | 43.91918821  | 35.08228597 | 85.62040265 | 88.78738145 | 129.6404412 | -1.342811699 | 5.958986076 | 4.5717881 |
| <b>ycjO</b> | gi 49175990 ref NC_000913.2 | + | 1371246 | 1372127 | 22.566719462 | 25.66678117 | 69.1391525  | 31.87567802 | 55.99656077 | -1.109039448 | 3.02514075  | 2.0321357 |
| <b>ycjP</b> | gi 49175990 ref NC_000913.2 | + | 1372114 | 1372956 | 11.87210994  | 23.85801836 | 53.68441321 | 37.19323554 | 41.58207858 | -1.353621425 | 3.998588488 | 2.8495719 |
| <b>ycjQ</b> | gi 49175990 ref NC_000913.2 | + | 1372987 | 1374039 | 28.15511493  | 20.83356373 | 65.33115722 | 36.24330004 | 51.59121011 | -1.008829641 | 3.114183442 | 2.1094502 |
| <b>ycjR</b> | gi 49175990 ref NC_000913.2 | + | 1374058 | 1374846 | 24.09939418  | 33.31151326 | 59.32755592 | 50.53290046 | 50.55917898 | -0.921043051 | 2.6893146   | 1.7633473 |
| <b>ycjS</b> | gi 49175990 ref NC_000913.2 | + | 1374856 | 1375911 | 35.46388339  | 32.26681017 | 76.48215307 | 67.29565902 | 60.74116647 | -0.988410372 | 3.572493571 | 2.5001067 |
| <b>ycjT</b> | gi 49175990 ref NC_000913.2 | + | 1375908 | 1378175 | 82.2855351   | 73.09186933 | 153.4384929 | 151.2114282 | 114.7451599 | -0.825287312 | 3.168155086 | 2.1526332 |
| <b>ycjU</b> | gi 49175990 ref NC_000913.2 | + | 1378172 | 1378831 | 4.659787079  | 9.553297585 | 15.77075011 | 17.78823648 | 9.184959096 | -1.045531196 | 1.307691729 | 0.6998487 |
| <b>ompG</b> | gi 49175990 ref NC_000913.2 | + | 1379971 | 1380876 | 12.23660834  | 8.505577743 | 13.72857653 | 21.18279364 | 19.03996759 | -0.766826716 | 1.174303321 | 0.6049913 |
| <b>ycjW</b> | gi 49175990 ref NC_000913.2 | - | 1380987 | 1381985 | 110.0651952  | 124.4677316 | 89.99905607 | 129.8939245 | 135.4836906 | -0.046525001 | 0.012485841 | 0         |
| <b>ycjX</b> | gi 49175990 ref NC_000913.2 | + | 1382141 | 1383538 | 151.3443332  | 154.82409   | 190.1313209 | 155.9071933 | 137.1343029 | -0.06312647  | 0.106675129 | 0.0284507 |
| <b>ycjY</b> | gi 49175990 ref NC_000913.2 | + | 1383535 | 1384596 | 130.5179059  | 106.2991417 | 123.3324677 | 90.88534823 | 69.96716186 | 0.367780482  | 0.67365872  | 0.3015412 |
| <b>tyrR</b> | gi 49175990 ref NC_000913.2 | + | 1384744 | 1386285 | 1729.615768  | 1695.400183 | 2346.53205  | 2179.520127 | 2028.270248 | -0.342699301 | 0.876126945 | 0.4157395 |
| <b>tpx</b>  | gi 49175990 ref NC_000913.2 | - | 1386329 | 1386835 | 3596.730013  | 4244.785758 | 3549.223239 | 3381.564186 | 4087.339038 | 0.067572558  | 0.174317093 | 0.0547989 |
| <b>ycjG</b> | gi 49175990 ref NC_000913.2 | + | 1386954 | 1387919 | 512.4341521  | 498.6344819 | 745.1648202 | 685.0471129 | 641.7985896 | -0.44017872  | 1.391800155 | 0.7554754 |
| <b>mpaA</b> | gi 49175990 ref NC_000913.2 | - | 1387894 | 1388622 | 329.5187839  | 380.9355114 | 349.5626395 | 394.6368405 | 430.5391084 | -0.168571407 | 0.266685114 | 0.0981516 |
| <b>ycjZ</b> | gi 49175990 ref NC_000913.2 | + | 1388957 | 1389877 | 59.05335147  | 86.55727465 | 39.78167629 | 72.65164217 | 74.87835418 | 0.151998823  | 0.341977499 | 0.1341942 |
| <b>ycjZ</b> | gi 49175990 ref NC_000913.2 | + | 1390015 | 1390914 | 178.1944718  | 200.4550058 | 141.5295304 | 197.0428586 | 176.073607  | 0.114205327  | 0.258231552 | 0.0943277 |
| <b>mppA</b> | gi 49175990 ref NC_000913.2 | + | 1391251 | 1392864 | 31.28145737  | 36.12319137 | 32.62548672 | 1313.779075 | 31.58243662 | -3.851274463 | 3.915517486 | 2.7841696 |
| <b>ynal</b> | gi 49175990 ref NC_000913.2 | - | 1392915 | 1393946 | 102.2034346  | 129.259575  | 82.58421023 | 199.6692236 | 107.9993415 | -0.224162258 | 0.232407436 | 0.082297  |
| <b>insH</b> | gi 49175990 ref NC_000913.2 | + | 1394100 | 1395116 | 876.0695292  | 973.6029968 | 835.1235365 | 980.875491  | 961.2487156 | -0.023993314 | 0.000289976 | 0         |
| <b>ynaJ</b> | gi 49175990 ref NC_000913.2 | + | 1395389 | 1395646 | 872.0242159  | 1046.775632 | 792.360071  | 763.6890746 | 936.364615  | 0.177910205  | 0.464483637 | 0.194418  |
| <b>uspE</b> | gi 49175990 ref NC_000913.2 | - | 1395696 | 1396646 | 3043.065485  | 3243.633952 | 6485.049929 | 7303.962041 | 5661.694427 | -1.053721882 | 4.853234366 | 3.5974284 |
| <b>fnr</b>  | gi 49175990 ref NC_000913.2 | - | 1396798 | 1397550 | 3272.775757  | 3463.036907 | 2403.298932 | 2709.763575 | 2837.829959 | 0.330272992  | 0.942893577 | 0.458135  |
| <b>ogt</b>  | gi 49175990 ref NC_000913.2 | - | 1397745 | 1398260 | 276.2003451  | 354.3869734 | 194.6481431 | 209.884396  | 303.3982718 | 0.370775019  | 1.068708478 | 0.536162  |
| <b>abgT</b> | gi 49175990 ref NC_000913.2 | - | 1398271 | 1399797 | 77.09767911  | 94.09706778 | 72.11555307 | 80.73558083 | 89.57588584 | 0.051831294  | 0.116698093 | 0.0329224 |
| <b>abgB</b> | gi 49175990 ref NC_000913.2 | - | 1399834 | 1401279 | 59.95354191  | 58.87842629 | 57.44373732 | 67.19764792 | 66.13557917 | -0.101094238 | 0.131918216 | 0.0394194 |
| <b>abgA</b> | gi 49175990 ref NC_000913.2 | - | 1401279 | 1402589 | 23.40842897  | 21.82795884 | 41.27507579 | 18.27530111 | 26.98833456 | -0.317846677 | 0.446340381 | 0.1840474 |
| <b>abgR</b> | gi 49175990 ref NC_000913.2 | + | 1402765 | 1403673 | 119.7764108  | 123.4828145 | 213.5649883 | 196.346394  | 223.1195096 | -0.797002834 | 3.07387513  | 2.0746209 |
| <b>smrA</b> | gi 49175990 ref NC_000913.2 | + | 1404003 | 1404566 | 397.0642409  | 374.1951471 | 324.570657  | 277.0774387 | 292.8193399 | 0.385950672  | 1.062138251 | 0.5314051 |
| <b>ydaM</b> | gi 49175990 ref NC_000913.2 | - | 1404587 | 1405819 | 228.3718835  | 229.8529304 | 184.7626965 | 213.9764798 | 191.877055  | 0.213617333  | 0.471296161 | 0.1982416 |

|       |                             |   |         |         |             |              |             |             |             |              |             |           |
|-------|-----------------------------|---|---------|---------|-------------|--------------|-------------|-------------|-------------|--------------|-------------|-----------|
| ydaN  | gi 49175990 ref NC_000913.2 | + | 1406074 | 1407057 | 727.9821931 | 635.3573665  | 867.1641815 | 683.8548643 | 453.8622288 | 0.070505437  | 0.044492868 | 0.0062873 |
| dbpA  | gi 49175990 ref NC_000913.2 | + | 1407535 | 1408908 | 451.220969  | 439.7469555  | 408.3371409 | 357.8140395 | 394.8164764 | 0.210886186  | 0.46568785  | 0.1952808 |
| ttcA  | gi 49175990 ref NC_000913.2 | - | 1409037 | 1409972 | 363.3635715 | 370.4309606  | 354.5131472 | 425.7223476 | 332.2623787 | -0.021252477 | 0.016665794 | 0         |
| intrR | gi 49175990 ref NC_000913.2 | - | 1410024 | 1411259 | 158.5912771 | 181.4649264  | 130.4258075 | 230.664704  | 239.6653677 | -0.278735235 | 0.410595894 | 0.1674779 |
| ydaC  | gi 49175990 ref NC_000913.2 | - | 1411555 | 1411764 | 3.062602778 | 3.803929377  | 7.933151191 | 5.69942231  | 8.912446281 | -1.11236067  | 1.098011548 | 0.5577652 |
| recT  | gi 49175990 ref NC_000913.2 | - | 1412008 | 1412817 | 34.60161504 | 36.09881665  | 27.09681119 | 30.38614525 | 43.43417287 | 0.056712081  | 0.07744811  | 0.0190529 |
| recE  | gi 49175990 ref NC_000913.2 | - | 1412810 | 1415410 | 71.40542892 | 67.41376138  | 48.44041216 | 53.94749611 | 74.77966876 | 0.228790314  | 0.395071507 | 0.1575167 |
| racC  | gi 49175990 ref NC_000913.2 | - | 1415512 | 1415787 | 7.535887652 | 7.594538163  | 7.97775704  | 5.715187373 | 9.998588005 | -0.0553319   | 0.005794796 | 0         |
| sieB  | gi 49175990 ref NC_000913.2 | + | 1416695 | 1417183 | 19.22888069 | 14.19702408  | 13.93342334 | 22.37083779 | 25.61576611 | -0.290600961 | 0.353631543 | 0.1402652 |
| ydaF  | gi 49175990 ref NC_000913.2 | - | 1417180 | 1417335 | 21.0413198  | 8.434141849  | 8.257955166 | 10.12329676 | 13.34015163 | 0.542541145  | 0.530277983 | 0.2274315 |
| ydaG  | gi 49175990 ref NC_000913.2 | - | 1417346 | 1417480 | 32.76167413 | 21.75921463  | 15.64919394 | 37.79522565 | 31.3203765  | -0.036271299 | 0.045181996 | 0.0067435 |
| racR  | gi 49175990 ref NC_000913.2 | - | 1417789 | 1418265 | 608.1627297 | 624.9845692  | 364.4256244 | 654.6030471 | 815.8553846 | -0.022728938 | 0.019039909 | 0         |
| ydaS  | gi 49175990 ref NC_000913.2 | + | 1418389 | 1418685 | 14.10682365 | 14.136267247 | 12.48164161 | 14.70135542 | 25.47103168 | 0.205965699  | 0.300187192 | 0.11561   |
| ydaT  | gi 49175990 ref NC_000913.2 | + | 1418708 | 1419130 | 17.48371054 | 19.96425704  | 11.95442921 | 15.53144619 | 8.022612008 | 0.64753878   | 0.957560995 | 0.4664401 |
| ydaU  | gi 49175990 ref NC_000913.2 | + | 1419143 | 1420000 | 27.58419897 | 30.41121409  | 21.98516215 | 20.51128818 | 49.8091897  | -0.111516874 | 0.057841786 | 0.0110921 |
| ydaV  | gi 49175990 ref NC_000913.2 | + | 1420007 | 1420753 | 7.108038389 | 13.36378017  | 9.244884789 | 11.1008703  | 5.749144219 | 0.18307008   | 0.193250055 | 0.062911  |
| rzoR  | gi 49175990 ref NC_000913.2 | + | 1421424 | 1421609 | 16.52837985 | 14.22078524  | 15.96984468 | 16.8005523  | 15.73239507 | -0.055683967 | 0.003016052 | 0         |
| trkG  | gi 49175990 ref NC_000913.2 | + | 1421806 | 1423263 | 196.2334348 | 240.384799   | 116.5127052 | 156.8837024 | 175.7913666 | 0.500850977  | 1.602663887 | 0.899623  |
| ynaK  | gi 49175990 ref NC_000913.2 | + | 1423401 | 1423664 | 9.75705043  | 5.650749758  | 6.834797762 | 5.730090759 | 12.1485906  | -0.055364444 | 0.048989498 | 0.0081378 |
| insH  | gi 49175990 ref NC_000913.2 | - | 1425770 | 1426750 | 131.2000878 | 132.0219531  | 150.196925  | 151.4434931 | 172.5815351 | -0.268103616 | 0.583080996 | 0.2562416 |
| stfR  | gi 49175990 ref NC_000913.2 | + | 1427073 | 1430435 | 75.82213476 | 93.14931035  | 71.09733744 | 92.95219678 | 96.30159851 | -0.075566595 | 0.039374697 | 0.0043015 |
| tfaR  | gi 49175990 ref NC_000913.2 | + | 1430435 | 1431010 | 23.91514209 | 37.14055348  | 24.29093699 | 33.47628415 | 28.07442079 | 0.039423607  | 0.086305758 | 0.0221491 |
| pinR  | gi 49175990 ref NC_000913.2 | - | 1431108 | 1431698 | 98.44331124 | 123.5569102  | 86.44953814 | 184.2154504 | 120.1790973 | -0.283205635 | 0.366356419 | 0.145076  |
| ynaE  | gi 49175990 ref NC_000913.2 | - | 1432015 | 1432248 | 122.1992388 | 164.4318266  | 47.45225864 | 211.4057833 | 83.47236845 | 0.248182418  | 0.432430919 | 0.1770091 |
| uspF  | gi 49175990 ref NC_000913.2 | - | 1433209 | 1433643 | 852.5788225 | 988.8204411  | 1885.454396 | 2053.800405 | 1859.932727 | -1.093138262 | 5.31752536  | 4.015107  |
| ompN  | gi 49175990 ref NC_000913.2 | - | 1433784 | 1434917 | 29.58358182 | 30.39561924  | 19.16516226 | 21.45248033 | 35.52407334 | 0.224605239  | 0.306549362 | 0.1187321 |
| ydbK  | gi 49175990 ref NC_000913.2 | - | 1435284 | 1438808 | 1991.596491 | 1890.096122  | 2335.211654 | 2054.971619 | 1531.67639  | -0.002621099 | 0.031447331 | 0.0026877 |
| ydbJ  | gi 49175990 ref NC_000913.2 | + | 1439082 | 1439386 | 535.2253868 | 422.5570965  | 1242.006317 | 846.595957  | 598.5969434 | -0.840745306 | 3.184432281 | 2.1650512 |
| hsiJ  | gi 49175990 ref NC_000913.2 | - | 1439345 | 1439767 | 496.4280047 | 517.66241    | 530.3481243 | 517.8970266 | 450.0387482 | 0.020711991  | 0.038277778 | 0.0042561 |
| ldhA  | gi 49175990 ref NC_000913.2 | - | 1439878 | 1440867 | 710.2335837 | 634.4181053  | 438.5650253 | 389.0915817 | 364.7480618 | 0.781882898  | 3.40863289  | 2.3598199 |
| ydbH  | gi 49175990 ref NC_000913.2 | + | 1441075 | 1443714 | 453.1033224 | 536.7177018  | 448.460889  | 440.6578122 | 456.5170315 | 0.118096758  | 0.299460961 | 0.1152438 |
| ydbE  | gi 49175990 ref NC_000913.2 | + | 1443711 | 1443896 | 44.99937039 | 39.85576684  | 41.65734031 | 61.3363607  | 43.89238327 | -0.201205281 | 0.331837297 | 0.1303325 |
| ydbL  | gi 49175990 ref NC_000913.2 | + | 1443904 | 1444230 | 57.29615697 | 59.84711232  | 28.46697086 | 114.3492462 | 56.32495937 | -0.223522514 | 0.184157239 | 0.059254  |
| feaR  | gi 49175990 ref NC_000913.2 | - | 1444402 | 1445307 | 51.76885857 | 50.32750684  | 52.35966079 | 68.26203584 | 66.10503657 | -0.291592499 | 0.542292767 | 0.2332111 |
| feaB  | gi 49175990 ref NC_000913.2 | + | 1445543 | 1447042 | 127.1917087 | 138.7019529  | 176.6845384 | 146.8536359 | 111.4702643 | -0.12078975  | 0.194430399 | 0.0635151 |
| tynA  | gi 49175990 ref NC_000913.2 | - | 1447100 | 1449373 | 75.38613102 | 85.52204856  | 90.06480311 | 75.32916832 | 94.09071692 | -0.116429263 | 0.149298666 | 0.0453478 |
| paaZ  | gi 49175990 ref NC_000913.2 | - | 1449621 | 1451666 | 14.71644237 | 11.36029483  | 16.67854742 | 12.32289871 | 6.94242922  | 0.165094772  | 0.063075358 | 0.0135708 |
| paaA  | gi 49175990 ref NC_000913.2 | + | 1451951 | 1452880 | 15.47123375 | 10.394338    | 17.59224493 | 14.80346446 | 29.923133   | -0.650851602 | 1.030754084 | 0.5157637 |
| paaB  | gi 49175990 ref NC_000913.2 | + | 1452892 | 1453179 | 12.67556627 | 3.709363676  | 6.911683419 | 6.836786347 | 13.25677379 | -0.055421133 | 0.067235449 | 0.0160372 |
| paaC  | gi 49175990 ref NC_000913.2 | + | 1453188 | 1453934 | 14.5694906  | 13.28016869  | 15.68519873 | 8.071313536 | 16.68776901 | 0.065505393  | 0.027194584 | 0.0014853 |
| paaD  | gi 49175990 ref NC_000913.2 | + | 1453949 | 1454446 | 15.17583578 | 14.23350505  | 20.13620866 | 8.007277749 | 6.930779849 | 0.36865036   | 0.347009581 | 0.1372877 |
| paaE  | gi 49175990 ref NC_000913.2 | + | 1454454 | 1455524 | 15.39426653 | 11.35407497  | 23.06852263 | 13.55809637 | 11.40445813 | -0.206664127 | 0.203349666 | 0.0682219 |
| paaF  | gi 49175990 ref NC_000913.2 | + | 1455521 | 1456288 | 11.65777955 | 16.18862717  | 14.80502102 | 21.1141008  | 13.58920121 | -0.276634921 | 0.183694143 | 0.0590752 |
| paaG  | gi 49175990 ref NC_000913.2 | + | 1456288 | 1457076 | 12.23360834 | 8.505577743  | 15.30188193 | 12.24979423 | 3.628700114 | 0.050424593  | 0           | 0         |
| paaH  | gi 49175990 ref NC_000913.2 | + | 1457078 | 1458505 | 28.28354677 | 18.91758129  | 19.87248912 | 23.38841157 | 14.76506987 | 0.327800427  | 0.389437041 | 0.1548204 |
| paal  | gi 49175990 ref NC_000913.2 | + | 1458495 | 1458917 | 6.700927531 | 9.526263889  | 11.48764295 | 7.860957293 | 4.641260535 | 0.014192765  | 0           | 0         |
| paaJ  | gi 49175990 ref NC_000913.2 | + | 1458917 | 1460122 | 88.10603801 | 74.02286781  | 80.09441896 | 108.4146112 | 80.93561758 | -0.133526244 | 0.233615375 | 0.0827918 |
| paaK  | gi 49175990 ref NC_000913.2 | + | 1460149 | 1461462 | 91.97178874 | 74.96224434  | 73.62246239 | 107.2427025 | 78.67803325 | -0.036530059 | 0.05559497  | 0.0102387 |
| paaX  | gi 49175990 ref NC_000913.2 | + | 1461563 | 1462513 | 365.4026411 | 356.1637804  | 414.2170733 | 379.894053  | 256.3054875 | 0.060445791  | 0.069330486 | 0.0166826 |
| paaY  | gi 49175990 ref NC_000913.2 | + | 1462495 | 1463085 | 404.3706291 | 413.1735986  | 437.3871286 | 429.2813673 | 350.2783673 | 0.014027369  | 0.020107755 | 0         |
| insD  | gi 49175990 ref NC_000913.2 | - | 1465945 | 1466850 | 1284.139199 | 1254.686071  | 1203.196061 | 1176.080772 | 1134.155356 | 0.121704685  | 0.236433479 | 0.0840982 |
| insC  | gi 49175990 ref NC_000913.2 | - | 1466808 | 1467173 | 764.3817269 | 850.127563   | 870.1744705 | 838.6424286 | 825.6575521 | -0.078434709 | 0.115789404 | 0.0327284 |
| insI  | gi 49175990 ref NC_000913.2 | + | 1467382 | 1468533 | 130.2261684 | 148.2173636  | 111.1226828 | 177.7622278 | 131.3691644 | -0.040010052 | 0.00465942  | 0         |
| ydbC  | gi 49175990 ref NC_000913.2 | + | 1472245 | 1473105 | 142.5958665 | 112.9364191  | 243.5592438 | 154.9906305 | 142.8560971 | -0.443257191 | 1.190904803 | 0.6164224 |
| ydbD  | gi 49175990 ref NC_000913.2 | + | 1473168 | 1475474 | 71.47352383 | 65.5048011   | 45.71898897 | 54.94536804 | 63.72382633 | 0.321982929  | 0.659787914 | 0.2968642 |
| ynbA  | gi 49175990 ref NC_000913.2 | + | 1475645 | 1476250 | 8.746698016 | 9.501862719  | 6.794717315 | 8.927358988 | 7.8632009   | 0.204673916  | 0.081269191 | 0.0204431 |
| ynbB  | gi 49175990 ref NC_000913.2 | + | 1476250 | 1477146 | 3.66664755  | 4.758042497  | 6.667223251 | 7.802288746 | 5.669046205 | -0.671666577 | 0.485249254 | 0.2045293 |

|             |                             |   |         |         |             |             |             |             |             |              |             |           |
|-------------|-----------------------------|---|---------|---------|-------------|-------------|-------------|-------------|-------------|--------------|-------------|-----------|
| <b>ynbC</b> | gi 49175990 ref NC_000913.2 | + | 1477162 | 1478919 | 67.502315   | 50.24891267 | 57.73769777 | 70.62379223 | 80.53709843 | -0.218548914 | 0.418114796 | 0.1710597 |
| <b>ynbD</b> | gi 49175990 ref NC_000913.2 | + | 1478933 | 1480225 | 50.18032022 | 41.73753882 | 73.76161689 | 59.54188224 | 60.6705544  | -0.461419103 | 1.155126297 | 0.5917071 |
| <b>azor</b> | gi 49175990 ref NC_000913.2 | - | 1480279 | 1480884 | 214.5630152 | 210.8466304 | 143.216346  | 135.7297274 | 142.4439265 | 0.60233039   | 2.037480306 | 1.2262165 |
| <b>hrpA</b> | gi 49175990 ref NC_000913.2 | + | 1481085 | 1484987 | 1660.319769 | 1575.708527 | 1758.060646 | 1478.800269 | 1201.806036 | 0.151194216  | 0.239241828 | 0.0858143 |
| <b>ycdF</b> | gi 49175990 ref NC_000913.2 | + | 1485259 | 1486059 | 265.6170401 | 265.9435725 | 263.8135736 | 241.1519283 | 254.6317355 | 0.073039389  | 0.124032502 | 0.0368896 |
| <b>aldA</b> | gi 49175990 ref NC_000913.2 | + | 1486256 | 1487695 | 712.6328247 | 660.0795355 | 691.4660349 | 635.5059152 | 429.0743824 | 0.254246176  | 0.491827994 | 0.2084543 |
| <b>cybB</b> | gi 49175990 ref NC_000913.2 | + | 1488926 | 1489456 | 577.368707  | 571.7779647 | 483.6839829 | 579.5369543 | 596.5977724 | 0.046428233  | 0.100067834 | 0.0264593 |
| <b>ycdA</b> | gi 49175990 ref NC_000913.2 | + | 1489701 | 1489874 | 257.5815712 | 299.2522997 | 425.2450399 | 347.7537908 | 373.5950259 | -0.468925992 | 1.357325883 | 0.7355514 |
| <b>hokB</b> | gi 49175990 ref NC_000913.2 | - | 1489946 | 1490095 | 532.6950542 | 613.6400661 | 591.6381483 | 486.9343642 | 664.8710679 | -0.038494141 | 0.025873093 | 0.000968  |
| <b>mokB</b> | gi 49175990 ref NC_000913.2 | - | 1489986 | 1490153 | 581.2418498 | 677.2832054 | 646.1440589 | 546.3420906 | 746.729565  | -0.060419416 | 0.058695698 | 0.0110921 |
| <b>trg</b>  | gi 49175990 ref NC_000913.2 | + | 1490494 | 1492134 | 481.1992473 | 514.8247816 | 1548.386736 | 1739.767324 | 1412.497578 | -1.663824118 | 12.1655972  | 10.218441 |
| <b>ycdI</b> | gi 49175990 ref NC_000913.2 | - | 1492172 | 1493095 | 410.8327257 | 400.8052243 | 442.4511953 | 579.2667    | 466.7808402 | -0.294587503 | 0.706229744 | 0.316685  |
| <b>ycdJ</b> | gi 49175990 ref NC_000913.2 | + | 1493312 | 1494655 | 410.4593063 | 370.3766981 | 664.9727343 | 820.2733996 | 599.3173035 | -0.820588621 | 3.427640758 | 2.3716094 |
| <b>opgD</b> | gi 49175990 ref NC_000913.2 | + | 1494880 | 1496535 | 814.5750655 | 818.7358996 | 837.2085929 | 733.5174893 | 948.6972401 | -0.041200926 | 0.06437772  | 0.0144896 |
| <b>ycdH</b> | gi 49175990 ref NC_000913.2 | + | 1496675 | 1496899 | 82.42979904 | 115.0454776 | 173.797243  | 274.319411  | 248.8920231 | -1.293756768 | 5.365640742 | 4.0567563 |
| <b>rimL</b> | gi 49175990 ref NC_000913.2 | + | 1496962 | 1497501 | 177.8973037 | 221.3941821 | 94.64859829 | 186.8174382 | 176.9461794 | 0.299312232  | 0.819710324 | 0.3794703 |
| <b>ycdK</b> | gi 49175990 ref NC_000913.2 | - | 1497493 | 1498473 | 168.148149  | 150.0208663 | 113.6659406 | 168.9001942 | 134.6785935 | 0.196037345  | 0.368651825 | 0.1454051 |
| <b>tehA</b> | gi 49175990 ref NC_000913.2 | + | 1498597 | 1499589 | 219.2309311 | 198.4651743 | 261.3903998 | 319.0684015 | 203.4801632 | -0.309819655 | 0.719842491 | 0.3221157 |
| <b>tehB</b> | gi 49175990 ref NC_000913.2 | + | 1499586 | 1500179 | 229.4389607 | 246.0269005 | 194.0665664 | 384.9290478 | 277.1411198 | -0.296387467 | 0.494151362 | 0.2099578 |
| <b>ycdL</b> | gi 49175990 ref NC_000913.2 | + | 1500481 | 1501149 | 285.3035666 | 335.3511538 | 194.9226817 | 264.5046302 | 298.0143535 | 0.25867298   | 0.67703562  | 0.3033725 |
| <b>insQ</b> | gi 49175990 ref NC_000913.2 | + | 1501741 | 1502889 | 938.0975746 | 985.9239538 | 1480.95464  | 2145.765836 | 2508.783593 | -1.116369147 | 4.670024056 | 3.4385075 |
| <b>ycdO</b> | gi 49175990 ref NC_000913.2 | - | 1502929 | 1504104 | 345.9071418 | 401.8338874 | 574.4998157 | 819.3438948 | 844.3738494 | -1.034899162 | 4.423177138 | 3.2282361 |
| <b>ycdN</b> | gi 49175990 ref NC_000913.2 | + | 1504196 | 1504732 | 187.3964534 | 186.1561064 | 174.9141234 | 160.4090578 | 166.0385268 | 0.164816262  | 0.311663419 | 0.1217048 |
| <b>ycdP</b> | gi 49175990 ref NC_000913.2 | + | 1504805 | 1506766 | 640.3426596 | 640.528139  | 485.2391252 | 454.085752  | 430.878023  | 0.508300737  | 1.751433523 | 1.0194661 |
| <b>yncJ</b> | gi 49175990 ref NC_000913.2 | - | 1506858 | 1507088 | 46.98526012 | 27.41618263 | 42.1743886  | 41.39921317 | 31.61446166 | 0.016447708  | 0.038194189 | 0.0042561 |
| <b>hicA</b> | gi 49175990 ref NC_000913.2 | + | 1507310 | 1507486 | 103.0628457 | 73.0163451  | 54.52193931 | 110.515862  | 90.77241626 | 0.063414503  | 0.053148459 | 0.0090819 |
| <b>hicB</b> | gi 49175990 ref NC_000913.2 | + | 1507532 | 1507948 | 68.14122892 | 67.42891    | 51.13834359 | 68.27965491 | 69.41012572 | 0.096732985  | 0.163100041 | 0.0517718 |
| <b>ycdR</b> | gi 49175990 ref NC_000913.2 | + | 1508027 | 1509433 | 260.4967633 | 266.9033601 | 187.6054071 | 218.532078  | 217.534595  | 0.332782387  | 0.889273815 | 0.4245558 |
| <b>ycdS</b> | gi 49175990 ref NC_000913.2 | + | 1509678 | 1510823 | 363.7577772 | 398.9583782 | 716.6976108 | 790.2842062 | 732.5446548 | -0.984655635 | 4.769182426 | 3.5303359 |
| <b>ycdT</b> | gi 49175990 ref NC_000913.2 | + | 1510841 | 1511854 | 184.7502411 | 236.6042135 | 380.2889819 | 383.2337692 | 285.3083755 | -0.757208218 | 2.623793439 | 1.7058441 |
| <b>ycdU</b> | gi 49175990 ref NC_000913.2 | + | 1511855 | 1512796 | 178.7409544 | 167.1355091 | 276.7990507 | 261.1733231 | 222.3585128 | -0.535352904 | 1.708846901 | 0.987112  |
| <b>ycdV</b> | gi 49175990 ref NC_000913.2 | + | 1512786 | 1513580 | 105.2482685 | 109.2377786 | 273.2326443 | 223.0649359 | 156.4610508 | -1.005930095 | 3.873863127 | 2.7539072 |
| <b>prf</b>  | gi 49175990 ref NC_000913.2 | + | 1513602 | 1515026 | 324.3178814 | 322.9298629 | 878.6224189 | 631.2446362 | 411.3041798 | -0.955253282 | 3.611767287 | 2.5333318 |
| <b>yncL</b> | gi 49175990 ref NC_000913.2 | - | 1515123 | 1515218 | 729.8544399 | 770.3184458 | 526.9002839 | 687.351509  | 923.6258601 | 0.046493855  | 0.126221259 | 0.0373086 |
| <b>ycdX</b> | gi 49175990 ref NC_000913.2 | + | 1515413 | 1515586 | 83.0672563  | 69.27254852 | 75.59305495 | 75.11481688 | 72.95537613 | 0.054090598  | 0.029038192 | 0.0017515 |
| <b>ycdY</b> | gi 49175990 ref NC_000913.2 | + | 1515672 | 1515905 | 1620.215133 | 1699.231916 | 1430.566197 | 1237.036963 | 1868.254583 | 0.123570277  | 0.247918877 | 0.0904131 |
| <b>ycdZ</b> | gi 49175990 ref NC_000913.2 | - | 1515906 | 1516355 | 211.6850332 | 233.6915352 | 246.0550581 | 205.2821218 | 198.7194122 | 0.036078744  | 0.060259697 | 0.0118829 |
| <b>yncA</b> | gi 49175990 ref NC_000913.2 | - | 1516352 | 1516870 | 282.5687186 | 290.6504662 | 307.4059781 | 279.2237565 | 271.5737187 | 0.004543878  | 0.004007536 | 0         |
| <b>curA</b> | gi 49175990 ref NC_000913.2 | + | 1517051 | 1518088 | 412.6940943 | 406.5084005 | 639.5235327 | 614.0217689 | 326.0851226 | -0.343881362 | 0.789759215 | 0.3626778 |
| <b>mcbr</b> | gi 49175990 ref NC_000913.2 | + | 1518286 | 1518951 | 152.3391905 | 171.0086876 | 76.99560523 | 134.1884867 | 123.219391  | 0.499808029  | 1.521982057 | 0.8425072 |
| <b>yncD</b> | gi 49175990 ref NC_000913.2 | - | 1518987 | 1521089 | 309.8126097 | 307.7318073 | 109.5759507 | 145.551338  | 136.7780235 | 1.230321053  | 6.933197104 | 5.4170293 |
| <b>yncE</b> | gi 49175990 ref NC_000913.2 | + | 1521331 | 1522392 | 806.7238568 | 732.2557272 | 199.6832352 | 192.0315304 | 291.0765366 | 1.761857285  | 13.50012104 | 11.367328 |
| <b>ansP</b> | gi 49175990 ref NC_000913.2 | - | 1522505 | 1524004 | 145.5723615 | 153.8873153 | 132.192795  | 102.282504  | 124.4491758 | 0.323721938  | 0.786010272 | 0.3615546 |
| <b>yncG</b> | gi 49175990 ref NC_000913.2 | + | 1524271 | 1524888 | 98.87139745 | 134.0355675 | 121.0750129 | 97.57955332 | 79.97048112 | 0.202009097  | 0.423651038 | 0.1736222 |
| <b>ycdC</b> | gi 49175990 ref NC_000913.2 | + | 1527946 | 1528428 | 4.801834285 | 7.628370029 | 4.001776424 | 2.328580122 | 5.530684859 | 0.609906468  | 0.474748837 | 0.1994892 |
| <b>ycdC</b> | gi 49175990 ref NC_000913.2 | + | 1529840 | 1530976 | 17.54565738 | 19.00512908 | 8.612965907 | 15.67292277 | 19.97297893 | 0.279373919  | 0.317246563 | 0.1239013 |
| <b>pptA</b> | gi 49175990 ref NC_000913.2 | + | 1531076 | 1531309 | 106.0407447 | 103.5163821 | 90.63258166 | 101.9901894 | 105.3509746 | 0.074654635  | 0.128125627 | 0.0373086 |
| <b>yddH</b> | gi 49175990 ref NC_000913.2 | - | 1531306 | 1531875 | 56.09438107 | 56.98910294 | 72.93276365 | 81.6411786  | 60.8093821  | -0.344126009 | 0.732412995 | 0.3287846 |
| <b>nhoA</b> | gi 49175990 ref NC_000913.2 | + | 1532048 | 1532893 | 77.17393333 | 53.07246681 | 72.46148742 | 65.0075954  | 54.06769886 | 0.080545934  | 0.020912598 | 0         |
| <b>yddE</b> | gi 49175990 ref NC_000913.2 | - | 1532989 | 1533882 | 332.8606456 | 362.8624583 | 350.0651462 | 364.2107769 | 297.5141665 | 0.035596922  | 0.077395323 | 0.0190529 |
| <b>narV</b> | gi 49175990 ref NC_000913.2 | - | 1533961 | 1534641 | 63.22716105 | 58.86198442 | 119.6636476 | 80.99417975 | 89.8647981  | -0.640172846 | 1.947501493 | 1.1616638 |
| <b>narW</b> | gi 49175990 ref NC_000913.2 | - | 1534638 | 1535333 | 56.94237712 | 37.88045045 | 82.89561588 | 76.1279909  | 53.08752026 | -0.5196678   | 1.319061255 | 0.7091468 |
| <b>narY</b> | gi 49175990 ref NC_000913.2 | - | 1535333 | 1536877 | 86.93628332 | 70.21151013 | 186.754996  | 109.1582511 | 128.0548628 | -0.797708712 | 2.781921723 | 1.8357082 |
| <b>narZ</b> | gi 49175990 ref NC_000913.2 | - | 1536874 | 1540614 | 281.3451864 | 285.8960838 | 480.4468904 | 309.9118984 | 412.743698  | -0.486766047 | 1.44734345  | 0.7892521 |
| <b>narU</b> | gi 49175990 ref NC_000913.2 | - | 1540696 | 1542084 | 111.6229281 | 113.0279554 | 126.9422038 | 81.22544987 | 139.8516623 | -0.041291902 | 0.051733856 | 0.0088785 |
| <b>yddJ</b> | gi 49175990 ref NC_000913.2 | - | 1542408 | 1542743 | 2.227109468 | 5.740917675 | 1.541191438 | 5.48016817  | 2.296504757 | 0.258666374  | 0.137391794 | 0.0414936 |
| <b>yddG</b> | gi 49175990 ref NC_000913.2 | - | 1544312 | 1545193 | 202.5655217 | 246.0803841 | 233.9452014 | 191.8071984 | 175.2411332 | 0.149022104  | 0.309287795 | 0.1198242 |



|             |                             |   |         |         |             |             |             |             |             |              |             |           |
|-------------|-----------------------------|---|---------|---------|-------------|-------------|-------------|-------------|-------------|--------------|-------------|-----------|
| <b>fdnG</b> | gi 49175990 ref NC_000913.2 | + | 1545425 | 1548472 | 4817.857513 | 4570.46439  | 4023.519787 | 888.2162682 | 6347.258162 | 0.336199283  | 0.369328844 | 0.1454051 |
| <b>fdnH</b> | gi 49175990 ref NC_000913.2 | + | 1548485 | 1549369 | 1119.934166 | 952.5816061 | 1929.907882 | 486.6721971 | 1498.296498 | -0.272219955 | 0.472452412 | 0.1985574 |
| <b>fdnI</b> | gi 49175990 ref NC_000913.2 | + | 1549362 | 1550015 | 844.1571561 | 867.1865904 | 1488.963991 | 497.7608    | 1307.501253 | -0.335908936 | 0.605186765 | 0.2677516 |
| <b>yddM</b> | gi 49175990 ref NC_000913.2 | - | 1550422 | 1550706 | 274.2000387 | 297.3223249 | 272.9529264 | 282.3198844 | 211.2396032 | 0.155424731  | 0.317757562 | 0.1239842 |
| <b>adhP</b> | gi 49175990 ref NC_000913.2 | - | 1550852 | 1551862 | 554.7618696 | 531.8710609 | 414.0851134 | 479.5644184 | 374.9103057 | 0.365975358  | 1.040077281 | 0.5204761 |
| <b>maeA</b> | gi 49175990 ref NC_000913.2 | - | 1551996 | 1553693 | 3979.408947 | 3617.782906 | 2601.838693 | 2753.446272 | 2585.661175 | 0.533494148  | 1.80038583  | 1.0531989 |
| <b>sra</b>  | gi 49175990 ref NC_000913.2 | - | 1553850 | 1553987 | 421.7860051 | 4665.520436 | 3786.028781 | 6198.760616 | 8175.461091 | -0.49026786  | 0.973666962 | 0.4750151 |
| <b>bdm</b>  | gi 49175990 ref NC_000913.2 | - | 1554089 | 1554304 | 172.1511215 | 219.5046052 | 148.6320097 | 159.0849796 | 139.2260747 | 0.361666244  | 1.021885374 | 0.5109224 |
| <b>osmC</b> | gi 49175990 ref NC_000913.2 | + | 1554649 | 1555080 | 2264.611343 | 2733.645985 | 3966.424438 | 3815.174579 | 3244.334784 | -0.577586938 | 1.807061008 | 1.057093  |
| <b>ddpF</b> | gi 49175990 ref NC_000913.2 | - | 1555136 | 1556062 | 238.3303773 | 250.7678943 | 296.096247  | 327.2498926 | 299.568229  | -0.340498375 | 0.84250815  | 0.3956627 |
| <b>ddpD</b> | gi 49175990 ref NC_000913.2 | - | 1556055 | 1557041 | 36.89091127 | 43.73188743 | 57.75367553 | 43.86168647 | 44.9783173  | -0.283667535 | 0.46749777  | 0.1960399 |
| <b>ddpC</b> | gi 49175990 ref NC_000913.2 | - | 1557038 | 1557934 | 59.30163408 | 77.97028318 | 107.0596822 | 88.7316046  | 97.60280777 | -0.536140531 | 1.367778379 | 0.741039  |
| <b>ddpB</b> | gi 49175990 ref NC_000913.2 | - | 1557931 | 1558953 | 39.06467117 | 55.1834222  | 42.6695487  | 48.13908839 | 44.88980739 | 0.01731304   | 0.055724939 | 0.0102387 |
| <b>ddpA</b> | gi 49175990 ref NC_000913.2 | - | 1558955 | 1560505 | 41.59540414 | 58.03151305 | 41.59130168 | 50.39466314 | 51.51199351 | 0.013212774  | 0.067154696 | 0.0160372 |
| <b>ddpX</b> | gi 49175990 ref NC_000913.2 | - | 1560519 | 1561100 | 15.17583578 | 14.23350505 | 22.77147056 | 26.84252655 | 24.69215487 | -0.744107192 | 1.428357471 | 0.7765289 |
| <b>dosP</b> | gi 49175990 ref NC_000913.2 | - | 1561358 | 1563757 | 128.5804142 | 133.9349488 | 89.60825015 | 146.1994804 | 82.26741561 | 0.292040912  | 0.618460188 | 0.2752477 |
| <b>dosC</b> | gi 49175990 ref NC_000913.2 | - | 1563782 | 1565164 | 109.4289875 | 97.78577338 | 90.3980712  | 112.8962438 | 77.68422866 | 0.157529526  | 0.264301077 | 0.0969652 |
| <b>yddW</b> | gi 49175990 ref NC_000913.2 | - | 1565528 | 1566847 | 168.194016  | 183.3447855 | 153.591172  | 119.1583648 | 159.0968349 | 0.281499726  | 0.636013824 | 0.284622  |
| <b>gadC</b> | gi 49175990 ref NC_000913.2 | - | 1566978 | 1568513 | 116.033085  | 117.7779719 | 140.9152178 | 109.9627262 | 95.64789821 | 0.030828207  | 0.020052352 | 0         |
| <b>gadB</b> | gi 49175990 ref NC_000913.2 | - | 1568669 | 1570069 | 151.6266593 | 140.5381752 | 148.4294277 | 152.3625061 | 128.0765001 | 0.044014139  | 0.04345085  | 0.0060195 |
| <b>pqqL</b> | gi 49175990 ref NC_000913.2 | - | 1570431 | 1573226 | 112.4461255 | 133.9866839 | 102.4264725 | 102.1294986 | 119.8458435 | 0.16247985   | 0.366681117 | 0.145076  |
| <b>yddB</b> | gi 49175990 ref NC_000913.2 | - | 1573271 | 1575643 | 66.4976109  | 58.8462781  | 64.20494097 | 57.50483702 | 98.17988434 | -0.218903709 | 0.356126056 | 0.1411458 |
| <b>yddA</b> | gi 49175990 ref NC_000913.2 | - | 1575681 | 1577366 | 12.94714133 | 17.13379788 | 14.49774944 | 6.985700098 | 18.82773135 | 0.140948045  | 0.126386028 | 0.0373086 |
| <b>ydeM</b> | gi 49175990 ref NC_000913.2 | - | 1577657 | 1578814 | 21.78194726 | 16.09279824 | 14.01375346 | 20.2535869  | 31.05107438 | -0.19063447  | 0.171072211 | 0.0538242 |
| <b>ydeN</b> | gi 49175990 ref NC_000913.2 | - | 1578866 | 1580548 | 92.85091369 | 113.0961884 | 127.2527713 | 246.8391825 | 130.5442609 | -0.749657077 | 1.8137319   | 1.0599419 |
| <b>ydeP</b> | gi 49175990 ref NC_000913.2 | - | 1582231 | 1584510 | 74.40736172 | 75.03357255 | 103.4539661 | 83.27671462 | 119.7345196 | -0.450279642 | 1.146897794 | 0.5877497 |
| <b>ydeQ</b> | gi 49175990 ref NC_000913.2 | - | 1584844 | 1585758 | 9.394846328 | 20.05276105 | 21.86101636 | 24.81444284 | 39.99653826 | -1.050891792 | 1.878663052 | 1.1101081 |
| <b>ydeR</b> | gi 49175990 ref NC_000913.2 | - | 1585817 | 1586320 | 18.34835256 | 17.08051097 | 35.20909803 | 33.93699615 | 65.58558613 | -1.342195036 | 3.734704832 | 2.6353354 |
| <b>ydeS</b> | gi 49175990 ref NC_000913.2 | - | 1586333 | 1586863 | 13.88887478 | 23.83509824 | 41.8827168  | 37.38427385 | 80.04891452 | -1.553482338 | 4.369534177 | 3.1812237 |
| <b>hipA</b> | gi 49175990 ref NC_000913.2 | - | 1588878 | 1590200 | 122.5263228 | 146.3364372 | 106.2219637 | 128.5952116 | 87.81138976 | 0.298060833  | 0.743334099 | 0.3361804 |
| <b>hipB</b> | gi 49175990 ref NC_000913.2 | - | 1590200 | 1590466 | 42.80954591 | 60.88835267 | 65.32004215 | 65.14685685 | 80.55210855 | -0.483769436 | 0.95507222  | 0.4657317 |
| <b>lsrK</b> | gi 49175990 ref NC_000913.2 | - | 1596641 | 1598233 | 155.3887148 | 155.2904831 | 147.285319  | 140.2381528 | 153.6038075 | 0.041162984  | 0.050495441 | 0.0085479 |
| <b>lsrR</b> | gi 49175990 ref NC_000913.2 | - | 1598312 | 1599265 | 114.4744107 | 102.5352085 | 162.9628772 | 148.0867848 | 154.8144931 | -0.499111254 | 1.581553587 | 0.885453  |
| <b>lsrA</b> | gi 49175990 ref NC_000913.2 | + | 1599514 | 1601049 | 36.02616109 | 34.1760265  | 40.6850227  | 56.02623762 | 65.89460998 | -0.634399786 | 1.499349588 | 0.8249424 |
| <b>lsrC</b> | gi 49175990 ref NC_000913.2 | + | 1601043 | 1602071 | 25.79517709 | 26.59664339 | 34.2212702  | 36.8034521  | 21.611094   | -0.232109546 | 0.290779073 | 0.1117456 |
| <b>lsrD</b> | gi 49175990 ref NC_000913.2 | + | 1602071 | 1603063 | 34.08522743 | 33.23295545 | 29.78961834 | 46.79680032 | 34.85668262 | -0.149738417 | 0.166983308 | 0.0526132 |
| <b>lsrB</b> | gi 49175990 ref NC_000913.2 | + | 1603075 | 1604097 | 38.1716718  | 44.67883647 | 49.45120999 | 69.14558412 | 45.10966937 | -0.419218796 | 0.771147237 | 0.3512842 |
| <b>lsrF</b> | gi 49175990 ref NC_000913.2 | + | 1604124 | 1604999 | 26.08712384 | 21.80659298 | 33.59998637 | 53.37002573 | 29.4443674  | -0.68321458  | 1.430546709 | 0.7777605 |
| <b>lsrG</b> | gi 49175990 ref NC_000913.2 | + | 1605023 | 1605313 | 15.78301811 | 15.18674821 | 29.83676861 | 43.56425573 | 40.32263645 | -1.293085852 | 3.858044813 | 2.742285  |
| <b>tam</b>  | gi 49175990 ref NC_000913.2 | + | 1605370 | 1606128 | 324.7785405 | 340.9998316 | 336.4963274 | 304.9842973 | 283.9727726 | 0.109953175  | 0.208783477 | 0.0708938 |
| <b>yneE</b> | gi 49175990 ref NC_000913.2 | - | 1606132 | 1607046 | 292.4370725 | 264.9507883 | 194.9051508 | 261.1590186 | 298.0032619 | 0.146043777  | 0.282213446 | 0.1071941 |
| <b>uxaB</b> | gi 49175990 ref NC_000913.2 | - | 1607253 | 1608704 | 329.9404824 | 334.3353567 | 631.8104372 | 518.0582426 | 463.5829851 | -0.683605118 | 2.618438109 | 1.7013706 |
| <b>yneF</b> | gi 49175990 ref NC_000913.2 | - | 1608931 | 1609878 | 355.9489908 | 345.7143019 | 527.8752335 | 527.9985672 | 479.1288966 | -0.537769189 | 1.866312274 | 1.1002533 |
| <b>yneG</b> | gi 49175990 ref NC_000913.2 | - | 1609990 | 1610349 | 595.8316764 | 678.2220091 | 695.9700961 | 777.0149396 | 912.7603812 | -0.347852332 | 0.832704199 | 0.3886274 |
| <b>yneH</b> | gi 49175990 ref NC_000913.2 | - | 1610349 | 1611275 | 606.6606289 | 555.5954155 | 505.3372291 | 445.3045048 | 522.5956668 | 0.257483904  | 0.583988797 | 0.256923  |
| <b>sad</b>  | gi 49175990 ref NC_000913.2 | - | 1611339 | 1612727 | 167.0961386 | 138.5954953 | 133.4203964 | 128.7855362 | 93.47241684 | 0.399169093  | 0.903611041 | 0.4348327 |
| <b>yneJ</b> | gi 49175990 ref NC_000913.2 | + | 1612828 | 1613709 | 114.9489346 | 109.2050868 | 87.95166095 | 92.01066446 | 107.4903809 | 0.227347011  | 0.471037069 | 0.1981824 |
| <b>yneK</b> | gi 49175990 ref NC_000913.2 | + | 1613787 | 1614902 | 10.18876568 | 8.525937031 | 10.76350622 | 8.017405397 | 16.60637079 | -0.316166441 | 0.300153259 | 0.11561   |
| <b>ydeA</b> | gi 49175990 ref NC_000913.2 | + | 1615052 | 1616242 | 205.6692828 | 206.1057746 | 195.6403257 | 157.1264916 | 161.6473396 | 0.273755933  | 0.59983168  | 0.2663791 |
| <b>marC</b> | gi 49175990 ref NC_000913.2 | - | 1616267 | 1616932 | 428.236349  | 453.0816511 | 442.9699762 | 422.7155361 | 422.9369715 | 0.031432375  | 0.062884962 | 0.0135708 |
| <b>marR</b> | gi 49175990 ref NC_000913.2 | + | 1617144 | 1617578 | 198.4985935 | 214.6861649 | 105.1451336 | 134.8507376 | 243.517725  | 0.322851146  | 0.694753622 | 0.3103556 |
| <b>marA</b> | gi 49175990 ref NC_000913.2 | + | 1617598 | 1617981 | 246.6754478 | 247.8987343 | 97.1167476  | 144.6708376 | 198.9913272 | 0.726281596  | 2.381770906 | 1.5050538 |
| <b>marB</b> | gi 49175990 ref NC_000913.2 | + | 1618013 | 1618231 | 192.3886861 | 194.7121167 | 123.8953276 | 114.6640104 | 174.4916424 | 0.482716249  | 1.328710893 | 0.7163989 |
| <b>eamA</b> | gi 49175990 ref NC_000913.2 | - | 1618262 | 1619161 | 271.3295678 | 268.7884093 | 267.3116649 | 242.1307859 | 201.0973835 | 0.200070974  | 0.392207504 | 0.1564777 |
| <b>ydeE</b> | gi 49175990 ref NC_000913.2 | + | 1619356 | 1620543 | 175.8500927 | 186.1823215 | 135.7485778 | 143.5683481 | 163.5793935 | 0.281004928  | 0.674182894 | 0.3018122 |
| <b>yneM</b> | gi 49175990 ref NC_000913.2 | + | 1620670 | 1620765 | 3600.53898  | 4221.037165 | 3397.128151 | 3530.67018  | 4541.456964 | 0.000940985  | 0.055598477 | 0.0102387 |
| <b>ydeH</b> | gi 49175990 ref NC_000913.2 | - | 1620984 | 1621874 | 457.9827596 | 471.1152895 | 233.9634747 | 408.8642894 | 406.847235  | 0.380332171  | 1.028173226 | 0.5144734 |

|      |                             |   |         |         |             |              |             |             |             |               |             |            |
|------|-----------------------------|---|---------|---------|-------------|--------------|-------------|-------------|-------------|---------------|-------------|------------|
| ydel | gi 49175990 ref NC_000913.2 | - | 1622129 | 1622521 | 99.56568957 | 103.53942    | 73.27693703 | 82.88981238 | 79.63358151 | 0.360425412   | 0.921775757 | 0.446994   |
| ydeJ | gi 49175990 ref NC_000913.2 | + | 1622797 | 1623315 | 65.42953808 | 70.30498066  | 36.62161354 | 63.48691295 | 43.87096602 | 0.476387064   | 1.151222021 | 0.5893608  |
| dcp  | gi 49175990 ref NC_000913.2 | - | 1623359 | 1625404 | 788.299948  | 741.770446   | 715.7962429 | 675.9547698 | 545.5097638 | 0.261433679   | 0.59049583  | 0.2609321  |
| ydfG | gi 49175990 ref NC_000913.2 | + | 1625541 | 1626287 | 2378.532346 | 2600.623732  | 2483.417211 | 2408.21396  | 2289.570228 | 0.046633092   | 0.099508046 | 0.0262976  |
| ydfH | gi 49175990 ref NC_000913.2 | + | 1626376 | 1627062 | 1354.341409 | 1264.162577  | 1353.45119  | 1381.275841 | 1437.994677 | -0.079476765  | 0.15638493  | 0.0487535  |
| ydfZ | gi 49175990 ref NC_000913.2 | + | 1627239 | 1627442 | 371.9410398 | 410.3589071  | 198.0425378 | 161.899098  | 274.2170238 | 0.869396141   | 3.64512094  | 2.5641232  |
| ydfI | gi 49175990 ref NC_000913.2 | - | 1627477 | 1628937 | 73.85023288 | 72.17380228  | 57.12731487 | 38.56177013 | 78.02121004 | 0.336261105   | 0.638645378 | 0.2852082  |
| ydfK | gi 49175990 ref NC_000913.2 | + | 1631096 | 1631329 | 133.9486461 | 155.8250421  | 49.80058694 | 172.5046598 | 81.10617398 | 0.463109068   | 0.957428756 | 0.4664401  |
| pinQ | gi 49175990 ref NC_000913.2 | + | 1631646 | 1632236 | 162.988722  | 121.5917213  | 62.99832627 | 185.0355554 | 103.4192946 | -0.023161376  | 0.019834267 | 0          |
| tfaQ | gi 49175990 ref NC_000913.2 | - | 1632334 | 1632909 | 30.14674937 | 32.30511695  | 20.30339788 | 26.82638788 | 25.75854691 | 0.346115997   | 0.584448804 | 0.2571565  |
| stfQ | gi 49175990 ref NC_000913.2 | - | 1632909 | 1633871 | 16.2685269  | 29.55748253  | 15.15681734 | 18.05169062 | 28.8457321  | 0.073704766   | 0.14422972  | 0.0432419  |
| ydfO | gi 49175990 ref NC_000913.2 | + | 1635071 | 1635481 | 9.890235048 | 12.36959227  | 4.36057525  | 12.0967599  | 5.701556471 | 0.548157874   | 0.662102236 | 0.2976012  |
| gnsB | gi 49175990 ref NC_000913.2 | - | 1635633 | 1635806 | 198.4377775 | 177.5658277  | 29.42615748 | 273.8124155 | 108.0810558 | 0.41255448    | 0.513985742 | 0.2208801  |
| ynfN | gi 49175990 ref NC_000913.2 | - | 1635978 | 1636133 | 59.18822919 | 81.78704267  | 15.32340659 | 107.3435122 | 41.83744975 | 0.273473389   | 0.413346434 | 0.1691072  |
| cspI | gi 49175990 ref NC_000913.2 | - | 1636479 | 1636691 | 704.9745405 | 806.4494632  | 259.8041502 | 704.1026822 | 464.4643876 | 0.613029024   | 1.72847603  | 1.0022231  |
| rzpQ | gi 49175990 ref NC_000913.2 | - | 1637054 | 1637551 | 54.74538166 | 57.95133836  | 42.85920785 | 59.13304056 | 42.78141391 | 0.210525041   | 0.378015949 | 0.1488553  |
| rzoQ | gi 49175990 ref NC_000913.2 | - | 1637104 | 1637358 | 29.68439781 | 41.87389078  | 26.856106   | 35.70042174 | 28.12492049 | 0.200157063   | 0.350488411 | 0.1391697  |
| rrrQ | gi 49175990 ref NC_000913.2 | - | 1637548 | 1638081 | 33.62917257 | 29.40931228  | 21.64237314 | 34.44758002 | 21.47717712 | 0.290921574   | 0.422117416 | 0.1729857  |
| ydfR | gi 49175990 ref NC_000913.2 | - | 1638078 | 1638389 | 17.97882446 | 22.83457216  | 15.09793646 | 27.72113958 | 16.95310485 | -0.00052582   | 0.009701419 | 0          |
| essQ | gi 49175990 ref NC_000913.2 | - | 1638394 | 1638609 | 14.36381826 | 16.15980527  | 6.984590359 | 7.943075005 | 14.36531294 | 0.617133224   | 0.789607194 | 0.3626778  |
| cspB | gi 49175990 ref NC_000913.2 | - | 1639363 | 1639578 | 6101.834299 | 7140.75786   | 2336.227545 | 4905.698062 | 5200.871324 | 0.618164578   | 1.830819821 | 1.072775   |
| cspF | gi 49175990 ref NC_000913.2 | + | 1639879 | 1640091 | 854.3711767 | 1021.128546  | 393.5041347 | 742.9439019 | 769.0361548 | 0.507658741   | 1.616777736 | 0.9126592  |
| quuQ | gi 49175990 ref NC_000913.2 | - | 1640513 | 1641265 | 66.05079447 | 71.25618959  | 84.73974957 | 84.03517568 | 74.17498728 | -0.243333462  | 0.446987068 | 0.1843451  |
| ydfU | gi 49175990 ref NC_000913.2 | - | 1641279 | 1642328 | 56.20807525 | 54.12367986  | 51.99428991 | 42.9096206  | 71.38986776 | -0.005740254  | 0           | 0          |
| rem  | gi 49175990 ref NC_000913.2 | - | 1642675 | 1642926 | 32.38214301 | 40.8966495   | 40.66118741 | 34.7674905  | 29.34310954 | 0.05425221    | 0.058536336 | 0.0110921  |
| hokD | gi 49175990 ref NC_000913.2 | - | 1643143 | 1643298 | 302.372314  | 351.4933308  | 264.7336385 | 280.4486769 | 363.0230284 | 0.080946003   | 0.202523963 | 0.0676994  |
| relE | gi 49175990 ref NC_000913.2 | - | 1643370 | 1643657 | 252.4508485 | 245.985901   | 171.8982481 | 219.5607222 | 208.5690629 | 0.310797585   | 0.767580721 | 0.3491173  |
| relB | gi 49175990 ref NC_000913.2 | - | 1643657 | 1643896 | 227.3761237 | 209.8706633  | 156.2315689 | 206.1749171 | 218.493244  | 0.172094405   | 0.339139711 | 0.1335511  |
| ydfV | gi 49175990 ref NC_000913.2 | + | 1643921 | 1644226 | 55.40146963 | 57.94773682  | 43.11517544 | 45.04983386 | 70.21808105 | 0.086177563   | 0.13859142  | 0.0415146  |
| fixA | gi 49175990 ref NC_000913.2 | + | 1644429 | 1644761 | 138.2550176 | 106.2779935  | 171.5028684 | 691.5170029 | 444.1793322 | -1.844980517  | 6.067368238 | 4.6642797  |
| dicC | gi 49175990 ref NC_000913.2 | - | 1645644 | 1645874 | 5.040489558 | 4.740808851  | 1.762701944 | 6.69566858  | 8.824624328 | -0.257852759  | 0.033720827 | 0.0030156  |
| dicA | gi 49175990 ref NC_000913.2 | + | 1645958 | 1646365 | 633.4432009 | 777.0383134  | 563.7922238 | 760.0104002 | 826.3768997 | -0.06862101   | 0.03133529  | 0.0026877  |
| ydfA | gi 49175990 ref NC_000913.2 | + | 1646532 | 1646687 | 21.51898876 | 19.92779635  | 16.34563432 | 23.43491043 | 21.28948325 | 0.024780712   | 0           | 0          |
| ydfB | gi 49175990 ref NC_000913.2 | + | 1646689 | 1646817 | 31.63386936 | 29.42344075  | 29.24385028 | 19.27289082 | 30.27270196 | 0.054832001   | 0.026955418 | 0.0014853  |
| ydfC | gi 49175990 ref NC_000913.2 | + | 1646847 | 1647065 | 62.22580077 | 68.41242294  | 64.30729525 | 72.94011495 | 89.4590686  | -0.230310766  | 0.366479383 | 0.145076   |
| rspB | gi 49175990 ref NC_000913.2 | - | 1650920 | 1651939 | 41.03650461 | 39.88024777  | 31.0023762  | 42.44052929 | 37.02391328 | 0.130529244   | 0.168708162 | 0.0531308  |
| rspA | gi 49175990 ref NC_000913.2 | - | 1651951 | 1653165 | 48.02856287 | 45.57202975  | 55.64424819 | 53.8305276  | 52.76386476 | -0.199476387  | 0.353272859 | 0.1402157  |
| ynfA | gi 49175990 ref NC_000913.2 | - | 1653371 | 1653697 | 109.1539108 | 108.2712401  | 94.49723783 | 108.6261111 | 98.75495924 | 0.108783129   | 0.197937713 | 0.0651964  |
| ynfB | gi 49175990 ref NC_000913.2 | + | 1653832 | 1654173 | 420.6201913 | 372.2677701  | 315.7119186 | 448.2531269 | 459.6429378 | -0.040935553  | 0.057538861 | 0.0110921  |
| speG | gi 49175990 ref NC_000913.2 | + | 1654208 | 1654768 | 582.7847788 | 624.053909   | 396.2262963 | 492.0620144 | 504.5990327 | 0.357428589   | 1.09626509  | 0.5563885  |
| ynfC | gi 49175990 ref NC_000913.2 | - | 1654771 | 1655481 | 309.3163649 | 359.0913728  | 220.2520244 | 342.7181611 | 315.0581424 | 0.152552863   | 0.379217775 | 0.149598   |
| ynfD | gi 49175990 ref NC_000913.2 | + | 1655589 | 1655894 | 740.1844001 | 729.4443836  | 1245.119678 | 1019.331481 | 1094.873111 | -0.59689925   | 2.166019693 | 1.3280853  |
| ynfE | gi 49175990 ref NC_000913.2 | + | 1656093 | 1658519 | 249.6712863 | 264.0676468  | 1165.693382 | 2568.480774 | 298.6411934 | -2.405490518  | 5.969732125 | 4.57599258 |
| ynfF | gi 49175990 ref NC_000913.2 | + | 1658580 | 1661003 | 331.337626  | 321.9693099  | 1150.645931 | 3210.659756 | 471.3335884 | -2.320038886  | 6.171839527 | 4.7522568  |
| ynfG | gi 49175990 ref NC_000913.2 | + | 1661014 | 1661631 | 68.96670796 | 62.65299969  | 254.9027292 | 679.4617193 | 116.7157175 | -2.42008854   | 6.92819151  | 5.4170293  |
| ynfH | gi 49175990 ref NC_000913.2 | + | 1661633 | 1662487 | 351.38458   | 357.1322116  | 661.8410353 | 1235.394771 | 550.3484047 | -1.220042641  | 4.582191418 | 3.364974   |
| dmsD | gi 49175990 ref NC_000913.2 | + | 1662530 | 1663144 | 230.9562519 | 227.945007   | 379.3217451 | 479.2014593 | 250.8009015 | -0.684525518  | 2.092736322 | 1.2724026  |
| clcB | gi 49175990 ref NC_000913.2 | + | 1663339 | 1664595 | 330.0535255 | 322.9221278  | 438.4721399 | 544.6483677 | 492.4493458 | -0.596134162  | 2.069539003 | 1.2518049  |
| ynfK | gi 49175990 ref NC_000913.2 | - | 1664548 | 1665243 | 1509.199978 | 1564.352961  | 2706.154642 | 2381.472513 | 2562.039517 | -0.730840879  | 2.73680912  | 1.8011016  |
| dgsA | gi 49175990 ref NC_000913.2 | - | 1665368 | 1666588 | 798.3698895 | 756.9709301  | 1364.829439 | 1207.61631  | 1277.675317 | -0.710128292  | 2.942595059 | 1.9681644  |
| ynfL | gi 49175990 ref NC_000913.2 | - | 1666723 | 1667616 | 75.79639507 | 94.10297389  | 88.17845939 | 60.83082313 | 76.26096074 | 0.162894049   | 0.298975335 | 0.1150997  |
| ynfM | gi 49175990 ref NC_000913.2 | + | 1667723 | 1668976 | 489.458476  | 514.8169369  | 272.6722019 | 309.4522    | 348.6054849 | 0.678587026   | 2.824530158 | 1.8696785  |
| asr  | gi 49175990 ref NC_000913.2 | + | 1669400 | 1669708 | 45.2274542  | 49.41078142  | 48.79933044 | 72.76072575 | 79.37686439 | -0.527184587  | 1.098362502 | 0.5577652  |
| ydgU | gi 49175990 ref NC_000913.2 | + | 1669801 | 1669880 | 18.95658586 | 18.033598082 | 28.19580721 | 35.75643118 | 31.43237468 | -0.7701839201 | 1.671496041 | 0.9582709  |
| ydgD | gi 49175990 ref NC_000913.2 | + | 1669984 | 1670805 | 725.9474677 | 794.0806588  | 944.7703968 | 992.154085  | 952.3877394 | -0.355815548  | 0.924761258 | 0.4496612  |
| mdtI | gi 49175990 ref NC_000913.2 | - | 1670844 | 1671173 | 149.5806933 | 146.2578774  | 88.07111524 | 107.4925159 | 100.931882  | 0.577258677   | 1.947452363 | 1.1616638  |
| mdtJ | gi 49175990 ref NC_000913.2 | - | 1671160 | 1671525 | 174.0182861 | 180.4748721  | 110.4944633 | 119.9652454 | 127.7632223 | 0.559861034   | 1.849062821 | 1.0867211  |

|             |                             |   |         |         |             |             |             |             |             |              |             |           |
|-------------|-----------------------------|---|---------|---------|-------------|-------------|-------------|-------------|-------------|--------------|-------------|-----------|
| <b>tqsA</b> | gi 49175990 ref NC_000913.2 | + | 1671937 | 1672971 | 301.4833245 | 311.5484629 | 642.5830451 | 519.2553019 | 516.175836  | -0.860614115 | 3.866326654 | 2.7477739 |
| <b>pntB</b> | gi 49175990 ref NC_000913.2 | - | 1672996 | 1674384 | 2581.92826  | 2226.284056 | 3277.256476 | 2302.92892  | 1604.80886  | 0.05557069   | 0.01097921  | 0         |
| <b>pntA</b> | gi 49175990 ref NC_000913.2 | - | 1674395 | 1675927 | 2206.133396 | 1757.990767 | 2967.982967 | 1978.996329 | 1456.713776 | -0.044098223 | 0.152590474 | 0.0474193 |
| <b>ydgH</b> | gi 49175990 ref NC_000913.2 | + | 1676451 | 1677395 | 504.7364056 | 422.5827207 | 654.4705558 | 534.9136503 | 507.2576451 | -0.249925626 | 0.692728298 | 0.3103556 |
| <b>ydgl</b> | gi 49175990 ref NC_000913.2 | + | 1677581 | 1678963 | 302.1407684 | 309.6451744 | 316.6233286 | 254.7643234 | 302.795407  | 0.0723235772 | 0.124482989 | 0.0369374 |
| <b>folM</b> | gi 49175990 ref NC_000913.2 | + | 1679000 | 1679722 | 315.6941901 | 294.4069888 | 291.8739521 | 292.6113162 | 286.0816816 | 0.082166078  | 0.127316005 | 0.0373086 |
| <b>ydgC</b> | gi 49175990 ref NC_000913.2 | - | 1679719 | 1680054 | 189.6295933 | 168.0637153 | 210.7212925 | 178.4885586 | 214.1313315 | -0.149623917 | 0.318645269 | 0.1240538 |
| <b>rstA</b> | gi 49175990 ref NC_000913.2 | + | 1680183 | 1680902 | 760.1286664 | 805.4634053 | 476.8604546 | 445.4303793 | 654.542334  | 0.559392337  | 1.96076889  | 1.1690804 |
| <b>rstB</b> | gi 49175990 ref NC_000913.2 | + | 1680906 | 1682207 | 820.1294176 | 854.8458964 | 513.4362519 | 468.8249893 | 549.4899469 | 0.708422001  | 3.120649877 | 2.1127955 |
| <b>tus</b>  | gi 49175990 ref NC_000913.2 | + | 1682283 | 1683212 | 271.2736517 | 273.5451516 | 196.6240788 | 204.0778718 | 217.5156832 | 0.398230776  | 1.153758242 | 0.590729  |
| <b>fumC</b> | gi 49175990 ref NC_000913.2 | - | 1683209 | 1684612 | 224.7333741 | 215.5855583 | 210.46549   | 196.1675593 | 169.6157941 | 0.209389164  | 0.401741877 | 0.1627105 |
| <b>fumA</b> | gi 49175990 ref NC_000913.2 | - | 1684755 | 1686401 | 712.3657666 | 713.3050167 | 738.8270521 | 760.0099781 | 651.9381308 | -0.006054182 | 0.008744623 | 0         |
| <b>manA</b> | gi 49175990 ref NC_000913.2 | + | 1686600 | 1687775 | 1450.77969  | 1395.250659 | 1389.26727  | 1487.669178 | 1402.216809 | 0.000192536  | 0.00124309  | 0         |
| <b>ydgA</b> | gi 49175990 ref NC_000913.2 | + | 1687876 | 1689384 | 2819.91526  | 2820.936841 | 2415.45541  | 3404.376844 | 2499.460803 | 0.014316891  | 0.041961388 | 0.0054988 |
| <b>uidC</b> | gi 49175990 ref NC_000913.2 | - | 1689610 | 1690875 | 17.60913381 | 18.0459296  | 14.90820518 | 19.01551516 | 19.02493928 | 0.00667601   | 0           | 0         |
| <b>uidB</b> | gi 49175990 ref NC_000913.2 | - | 1690914 | 1692287 | 43.75370438 | 53.2414662  | 67.50091071 | 59.53791592 | 66.15146576 | -0.426724711 | 0.894938542 | 0.4285397 |
| <b>uidA</b> | gi 49175990 ref NC_000913.2 | - | 1692284 | 1694095 | 122.5182305 | 92.02589445 | 163.3250597 | 149.3197002 | 188.2131436 | -0.603601425 | 1.974812124 | 1.1824631 |
| <b>uidR</b> | gi 49175990 ref NC_000913.2 | - | 1694486 | 1695076 | 947.5739843 | 992.5710573 | 1441.369309 | 1628.954003 | 1655.570777 | -0.712568224 | 2.736154853 | 1.8011016 |
| <b>hdhA</b> | gi 49175990 ref NC_000913.2 | - | 1695297 | 1696064 | 1259.133057 | 1379.166162 | 629.7929781 | 805.9231173 | 795.162323  | 0.802139763  | 3.797134068 | 2.6882789 |
| <b>mall</b> | gi 49175990 ref NC_000913.2 | - | 1696176 | 1697204 | 284.1349873 | 217.3914121 | 383.9459756 | 347.4906428 | 276.3197627 | -0.375271649 | 1.113834675 | 0.5667635 |
| <b>malX</b> | gi 49175990 ref NC_000913.2 | + | 1697379 | 1698971 | 381.1965803 | 369.4585847 | 599.7880881 | 558.5183067 | 666.1046254 | -0.692689414 | 2.789245176 | 1.840045  |
| <b>malY</b> | gi 49175990 ref NC_000913.2 | + | 1698981 | 1700153 | 359.9613317 | 396.1104218 | 468.726423  | 450.9218374 | 580.7056593 | -0.421578638 | 1.125307466 | 0.5718716 |
| <b>add</b>  | gi 49175990 ref NC_000913.2 | + | 1700257 | 1701258 | 2900.533593 | 3027.066547 | 2027.930393 | 1539.704936 | 1944.95963  | 0.691578631  | 2.532975409 | 1.6315256 |
| <b>ydgJ</b> | gi 49175990 ref NC_000913.2 | - | 1701292 | 1702332 | 917.6882421 | 855.7434763 | 726.7634127 | 602.3460802 | 745.7850815 | 0.37230271   | 1.039537026 | 0.5204761 |
| <b>blr</b>  | gi 49175990 ref NC_000913.2 | + | 1702575 | 1702700 | 1322.929093 | 1421.898601 | 1057.751622 | 1118.320468 | 2244.427965 | -0.134523829 | 0.141401    | 0.0424335 |
| <b>cnu</b>  | gi 49175990 ref NC_000913.2 | + | 1702973 | 1703188 | 78.08293414 | 106.4865335 | 31.76436331 | 30.76632633 | 90.87489022 | 0.787199364  | 1.872256485 | 1.1049513 |
| <b>ydgK</b> | gi 49175990 ref NC_000913.2 | + | 1703274 | 1703714 | 930.2958965 | 1045.794313 | 418.4662136 | 439.0024507 | 1020.391949 | 0.616605819  | 1.671108304 | 0.9582709 |
| <b>rsxA</b> | gi 49175990 ref NC_000913.2 | + | 1703791 | 1704372 | 416.8011225 | 451.1924635 | 194.6549209 | 174.2915998 | 340.0750591 | 0.852671486  | 3.196898886 | 2.1724452 |
| <b>rsxB</b> | gi 49175990 ref NC_000913.2 | + | 1704372 | 1704950 | 320.9367942 | 342.907251  | 169.0451123 | 121.7314971 | 273.8905589 | 0.801643461  | 2.63467953  | 1.7147128 |
| <b>rsxC</b> | gi 49175990 ref NC_000913.2 | + | 1704943 | 1707165 | 845.3756095 | 879.5401537 | 516.9055774 | 429.994738  | 844.8225853 | 0.514299942  | 1.475247769 | 0.8078375 |
| <b>rsxD</b> | gi 49175990 ref NC_000913.2 | + | 1707166 | 1708224 | 340.2370405 | 394.2341195 | 266.3065575 | 213.683035  | 483.4619404 | 0.160293635  | 0.322767081 | 0.1254812 |
| <b>rsxE</b> | gi 49175990 ref NC_000913.2 | + | 1708228 | 1708848 | 178.9972726 | 189.9826653 | 145.4059376 | 131.6123349 | 238.1571977 | 0.084716703  | 0.159929216 | 0.049678  |
| <b>rsxE</b> | gi 49175990 ref NC_000913.2 | + | 1708852 | 1709547 | 208.2914043 | 248.9229259 | 138.7185454 | 117.1061834 | 230.2420575 | 0.462143743  | 1.202119945 | 0.621995  |
| <b>nth</b>  | gi 49175990 ref NC_000913.2 | + | 1709547 | 1710182 | 202.2747319 | 219.4366131 | 114.9210579 | 114.6683256 | 184.450748  | 0.588640994  | 1.803738036 | 1.055955  |
| <b>gtpA</b> | gi 49175990 ref NC_000913.2 | + | 1710793 | 1712295 | 1708.277943 | 1620.349408 | 1353.27944  | 117.204582  | 1565.577547 | 0.307507917  | 0.627044082 | 0.3222172 |
| <b>gstA</b> | gi 49175990 ref NC_000913.2 | + | 1712401 | 1713006 | 469.8936805 | 494.8714152 | 468.2311994 | 487.5666622 | 418.6023398 | 0.068871771  | 0.140876123 | 0.0420426 |
| <b>pdxY</b> | gi 49175990 ref NC_000913.2 | - | 1713050 | 1713913 | 505.2843095 | 523.358192  | 603.0532165 | 504.6880371 | 529.5335419 | -0.082441764 | 0.150840547 | 0.0460761 |
| <b>tyrS</b> | gi 49175990 ref NC_000913.2 | - | 1713972 | 1715246 | 2379.351257 | 2465.724334 | 2559.850138 | 2116.903334 | 2191.977149 | 0.085515477  | 0.146122063 | 0.0438611 |
| <b>pdxH</b> | gi 49175990 ref NC_000913.2 | - | 1715375 | 1716031 | 549.1777797 | 511.9122715 | 514.8751722 | 526.9267373 | 523.851684  | 0.032649819  | 0.042349404 | 0.005706  |
| <b>mliC</b> | gi 49175990 ref NC_000913.2 | - | 1716090 | 1716419 | 120.5730627 | 147.2951577 | 121.0507817 | 113.4574658 | 152.2304915 | 0.025197718  | 0.084034204 | 0.021045  |
| <b>anmK</b> | gi 49175990 ref NC_000913.2 | - | 1716517 | 1717626 | 334.6882471 | 372.3698347 | 407.254441  | 399.1521479 | 399.3610983 | -0.198723701 | 0.393051875 | 0.1567356 |
| <b>slyB</b> | gi 49175990 ref NC_000913.2 | + | 1717900 | 1718367 | 7704.519621 | 7666.873772 | 6622.919548 | 6249.361628 | 6655.205136 | 0.241794569  | 0.539228983 | 0.2319924 |
| <b>slyA</b> | gi 49175990 ref NC_000913.2 | + | 1718414 | 1718848 | 1563.613748 | 1553.884815 | 2263.570281 | 2365.579255 | 2332.083537 | -0.574944105 | 1.859651222 | 1.0954548 |
| <b>ydhl</b> | gi 49175990 ref NC_000913.2 | + | 1719049 | 1719285 | 120.519209  | 150.1525875 | 76.49301477 | 206.6973364 | 168.0548472 | -0.215691274 | 0.191978143 | 0.0623582 |
| <b>ydHJ</b> | gi 49175990 ref NC_000913.2 | + | 1719288 | 1720145 | 245.0767405 | 274.5406873 | 183.8883413 | 215.2776399 | 248.7260251 | 0.240495171  | 0.597267025 | 0.2647326 |
| <b>ydHK</b> | gi 49175990 ref NC_000913.2 | + | 1720145 | 1722157 | 570.7210662 | 625.0142067 | 591.5988848 | 546.1258018 | 594.4631044 | 0.039358043  | 0.089664399 | 0.023818  |
| <b>sodC</b> | gi 49175990 ref NC_000913.2 | - | 1722158 | 1722679 | 397.5466413 | 475.9339688 | 580.5959378 | 554.8852745 | 463.5669051 | -0.305765881 | 0.697103564 | 0.1309446 |
| <b>ydHF</b> | gi 49175990 ref NC_000913.2 | - | 1722760 | 1723656 | 814.4038026 | 860.5512315 | 1399.091306 | 1297.127725 | 1118.649845 | -0.602555245 | 2.168238341 | 1.3280853 |
| <b>ydHL</b> | gi 49175990 ref NC_000913.2 | - | 1723705 | 1723944 | 96.92531673 | 105.4555949 | 110.6316392 | 72.12085984 | 97.52476928 | 0.11719073   | 0.187645394 | 0.0607696 |
| <b>nemR</b> | gi 49175990 ref NC_000913.2 | + | 1724047 | 1724646 | 158.4554876 | 190.0329893 | 134.7524962 | 154.7692831 | 184.7707469 | 0.105882072  | 0.247261854 | 0.0903598 |
| <b>nemA</b> | gi 49175990 ref NC_000913.2 | + | 1724683 | 1725780 | 508.1664291 | 472.9694724 | 525.898423  | 601.9554581 | 593.3316074 | -0.222089428 | 0.511868743 | 0.2198088 |
| <b>gloA</b> | gi 49175990 ref NC_000913.2 | + | 1725861 | 1726268 | 867.7261616 | 835.812564  | 957.3833262 | 853.2705929 | 831.3408128 | -0.036048791 | 0.078668887 | 0.0192386 |
| <b>rnt</b>  | gi 49175990 ref NC_000913.2 | + | 1726371 | 1727018 | 389.1931807 | 401.7804767 | 330.8793328 | 333.1625264 | 424.7741954 | 0.113005991  | 0.237483098 | 0.0849964 |
| <b>lhr</b>  | gi 49175990 ref NC_000913.2 | + | 1727111 | 1731727 | 678.9599592 | 672.4580233 | 882.1977118 | 847.6476216 | 873.8253752 | -0.358366038 | 1.024764706 | 0.5210803 |
| <b>grxD</b> | gi 49175990 ref NC_000913.2 | - | 1731778 | 1732125 | 1529.258733 | 1647.005086 | 1198.108743 | 1038.502525 | 1387.246053 | 0.383481676  | 1.125262323 | 0.5718716 |
| <b>ydHO</b> | gi 49175990 ref NC_000913.2 | + | 1732459 | 1733274 | 259.2763777 | 262.1485462 | 227.8305745 | 242.4228686 | 357.2073096 | -0.095347318 | 0.124277144 | 0.0369374 |
| <b>sodB</b> | gi 49175990 ref NC_000913.2 | + | 1733402 | 1733983 | 4339.31917  | 4400.480396 | 7392.451012 | 6026.183187 | 4835.149825 | -0.46269273  | 1.289736286 | 0.6874068 |

|             |                             |   |         |         |             |             |             |             |             |              |             |           |
|-------------|-----------------------------|---|---------|---------|-------------|-------------|-------------|-------------|-------------|--------------|-------------|-----------|
| <b>ydhP</b> | gi 49175990 ref NC_000913.2 | - | 1734145 | 1735314 | 348.9342243 | 346.6741655 | 311.8595597 | 326.1867493 | 306.3000467 | 0.144233078  | 0.295946196 | 0.1141666 |
| <b>ynhF</b> | gi 49175990 ref NC_000913.2 | - | 1735480 | 1735569 | 1321.900695 | 929.7015072 | 2696.478256 | 3927.39302  | 5229.859715 | -1.786833109 | 9.935801861 | 8.1388008 |
| <b>purR</b> | gi 49175990 ref NC_000913.2 | + | 1735868 | 1736893 | 1314.343027 | 1315.485468 | 1306.788953 | 1386.850007 | 1398.776779 | -0.068857285 | 0.115399672 | 0.0327284 |
| <b>ydhB</b> | gi 49175990 ref NC_000913.2 | - | 1736890 | 1737822 | 222.6274057 | 228.9121832 | 203.4377567 | 205.3205108 | 254.3348368 | 0.021295344  | 0.050504992 | 0.0085479 |
| <b>ydhC</b> | gi 49175990 ref NC_000913.2 | + | 1737935 | 1739146 | 298.2491019 | 259.234364  | 155.0973288 | 121.8096988 | 328.4609114 | 0.468075705  | 0.916026721 | 0.4425158 |
| <b>cfa</b>  | gi 49175990 ref NC_000913.2 | + | 1739437 | 1740585 | 1684.028985 | 1724.865432 | 1739.467556 | 1491.082947 | 1150.258427 | 0.234469791  | 0.467539759 | 0.1960399 |
| <b>ribC</b> | gi 49175990 ref NC_000913.2 | - | 1740625 | 1741266 | 1050.886876 | 1156.912426 | 796.8464963 | 952.8961445 | 1003.746386 | 0.242436452  | 0.65503584  | 0.2935851 |
| <b>mdtK</b> | gi 49175990 ref NC_000913.2 | + | 1741481 | 1742854 | 629.7475905 | 517.5546071 | 513.0873574 | 510.0028417 | 423.1656019 | 0.283029496  | 0.604681307 | 0.2677516 |
| <b>ydhQ</b> | gi 49175990 ref NC_000913.2 | - | 1742895 | 1744151 | 1177.865221 | 1037.130595 | 1450.818277 | 1145.745633 | 734.3463224 | 0.038188547  | 0.000556939 | 0         |
| <b>ydhR</b> | gi 49175990 ref NC_000913.2 | + | 1744724 | 1745029 | 1142.32478  | 1278.496418 | 1235.609867 | 1200.963721 | 1531.925678 | -0.149349885 | 0.238377883 | 0.0855881 |
| <b>ydhS</b> | gi 49175990 ref NC_000913.2 | + | 1745155 | 1746759 | 403.1831425 | 402.7154264 | 355.1035522 | 565.3852764 | 331.3511787 | -0.061427622 | 0.07071034  | 0.0170551 |
| <b>ydhT</b> | gi 49175990 ref NC_000913.2 | - | 1746771 | 1747583 | 108.1682345 | 122.5686968 | 227.0033558 | 595.4576188 | 108.8286055 | -1.463677054 | 3.119550587 | 2.1127805 |
| <b>ydhU</b> | gi 49175990 ref NC_000913.2 | - | 1747587 | 1748372 | 54.70899965 | 58.90639302 | 220.256505  | 567.3961642 | 90.91590644 | -2.391365087 | 6.39615857  | 4.9565059 |
| <b>ydhX</b> | gi 49175990 ref NC_000913.2 | - | 1748369 | 1749037 | 63.33953375 | 55.99722246 | 342.8736208 | 702.0927537 | 94.3704974  | -2.661547726 | 7.434773542 | 5.8779376 |
| <b>ydhW</b> | gi 49175990 ref NC_000913.2 | - | 1749101 | 1749748 | 52.70438958 | 59.87244892 | 417.5849476 | 1001.019262 | 88.83318748 | -3.183923201 | 7.798622359 | 6.2057413 |
| <b>ydhV</b> | gi 49175990 ref NC_000913.2 | - | 1749752 | 1751854 | 121.0247745 | 125.3843512 | 1332.842485 | 306.693596  | 252.6820633 | -3.648820161 | 9.641200576 | 7.8637951 |
| <b>ydhY</b> | gi 49175990 ref NC_000913.2 | - | 1751875 | 1752501 | 30.96963161 | 42.81984476 | 813.5402312 | 1598.784062 | 124.7772607 | -4.553258985 | 12.54005811 | 10.486446 |
| <b>ydhZ</b> | gi 49175990 ref NC_000913.2 | - | 1752956 | 1753165 | 309.508472  | 338.1680971 | 280.8814722 | 580.3225802 | 592.904724  | -0.625421543 | 1.469190487 | 0.8027706 |
| <b>pykF</b> | gi 49175990 ref NC_000913.2 | + | 1753722 | 1755134 | 4914.007911 | 5204.042333 | 6302.919427 | 5447.848108 | 6121.247654 | -0.239569232 | 0.511368592 | 0.2196639 |
| <b>lpp</b>  | gi 49175990 ref NC_000913.2 | + | 1755445 | 1755681 | 311254.1783 | 318775.8232 | 366970.9309 | 258121.5426 | 355903.5783 | -0.047679706 | 0.078124644 | 0.0192386 |
| <b>ynhG</b> | gi 49175990 ref NC_000913.2 | - | 1755745 | 1756749 | 720.5944334 | 716.1509527 | 1200.587944 | 1332.741782 | 997.5720638 | -0.709753123 | 2.762409728 | 1.8208812 |
| <b>sufE</b> | gi 49175990 ref NC_000913.2 | - | 1756898 | 1757314 | 223.8785866 | 187.9868897 | 263.8218828 | 255.6141349 | 241.2810708 | -0.273813351 | 0.711453595 | 0.3184473 |
| <b>sufS</b> | gi 49175990 ref NC_000913.2 | - | 1757327 | 1758547 | 720.1338119 | 680.9848861 | 959.8232543 | 901.2894069 | 707.08443   | -0.271933829 | 0.711506928 | 0.3184473 |
| <b>sufD</b> | gi 49175990 ref NC_000913.2 | - | 1758544 | 1759815 | 566.6315152 | 467.2165895 | 702.2940178 | 691.4635556 | 443.6756852 | -0.206744286 | 0.49427543  | 0.2099578 |
| <b>sufC</b> | gi 49175990 ref NC_000913.2 | - | 1759790 | 1760536 | 329.8248777 | 284.8759611 | 375.8068126 | 332.9043679 | 251.7102351 | -0.025865902 | 0.089913432 | 0.023818  |
| <b>sufB</b> | gi 49175990 ref NC_000913.2 | - | 1760546 | 1762033 | 521.1995651 | 429.2240702 | 613.9669345 | 574.7285852 | 260.0375528 | 0.024109758  | 0.024627408 | 0.0005477 |
| <b>sufA</b> | gi 49175990 ref NC_000913.2 | - | 1762042 | 1762410 | 137.3500725 | 146.2915594 | 166.7564139 | 184.6074929 | 109.3282396 | -0.116700691 | 0.173383271 | 0.0547682 |
| <b>ydiH</b> | gi 49175990 ref NC_000913.2 | - | 1762958 | 1763146 | 260.6001801 | 258.3407994 | 487.1683046 | 513.4683132 | 521.5549951 | -0.968956118 | 4.834512734 | 3.5844338 |
| <b>ydiI</b> | gi 49175990 ref NC_000913.2 | - | 1763246 | 1763656 | 151.1654745 | 131.9671609 | 195.9647851 | 154.6269611 | 90.40508301 | -0.013408291 | 0.063647099 | 0.0138785 |
| <b>ydiJ</b> | gi 49175990 ref NC_000913.2 | - | 1763653 | 1766709 | 830.7108155 | 752.200604  | 1148.767506 | 808.318536  | 430.5654399 | 0.040186928  | 0.005238269 | 0         |
| <b>ydiK</b> | gi 49175990 ref NC_000913.2 | + | 1767098 | 1768210 | 823.6237669 | 777.8649416 | 730.4799296 | 617.9247377 | 655.144932  | 0.27711911   | 0.670112317 | 0.2999977 |
| <b>ydiL</b> | gi 49175990 ref NC_000913.2 | + | 1768639 | 1768995 | 5.754970402 | 13.38190469 | 6.948594436 | 12.20651241 | 9.004616747 | -0.055445972 | 0           | 0         |
| <b>ydiM</b> | gi 49175990 ref NC_000913.2 | + | 1769095 | 1770309 | 16.93496138 | 18.05230255 | 12.65251688 | 20.18301749 | 26.65672571 | -0.20383408  | 0.13892548  | 0.0415146 |
| <b>ydiN</b> | gi 49175990 ref NC_000913.2 | + | 1770536 | 1771801 | 8.823681591 | 8.540579884 | 6.711019867 | 4.607709845 | 9.955649911 | 0.293995649  | 0.251395279 | 0.09173   |
| <b>ydiB</b> | gi 49175990 ref NC_000913.2 | + | 1771813 | 1772679 | 45.84641775 | 50.36234047 | 34.08142317 | 41.64227592 | 65.66816117 | 0.002388391  | 0.025175519 | 0.0060609 |
| <b>aroD</b> | gi 49175990 ref NC_000913.2 | + | 1772710 | 1773468 | 234.2737846 | 219.3746192 | 177.5149939 | 154.8741253 | 171.5935113 | 0.446055884  | 1.234568721 | 0.6458436 |
| <b>ydiF</b> | gi 49175990 ref NC_000913.2 | + | 1773611 | 1775206 | 8.219798621 | 7.586816861 | 6.873758554 | 7.894253915 | 11.10491514 | -0.121721751 | 0.026205542 | 0.000968  |
| <b>ydiO</b> | gi 49175990 ref NC_000913.2 | + | 1775220 | 1776371 | 24.96659026 | 29.47552306 | 20.04957714 | 20.23008953 | 23.48009389 | 0.337470763  | 0.536147913 | 0.230724  |
| <b>ydiP</b> | gi 49175990 ref NC_000913.2 | - | 1776414 | 1777325 | 43.75370438 | 53.2414662  | 31.64736809 | 53.69305539 | 60.26717675 | -0.04443931  | 0           | 0         |
| <b>ydiQ</b> | gi 49175990 ref NC_000913.2 | + | 1777641 | 1778405 | 33.08797301 | 16.97166491 | 23.21991643 | 36.80893403 | 32.48958601 | -0.250430859 | 0.36784649  | 0.145076  |
| <b>ydiR</b> | gi 49175990 ref NC_000913.2 | + | 1778425 | 1779363 | 34.554066   | 37.05554195 | 47.54344429 | 48.10965392 | 37.21837439 | -0.308037711 | 0.517194591 | 0.2218965 |
| <b>ydiS</b> | gi 49175990 ref NC_000913.2 | + | 1779419 | 1780708 | 18.7688759  | 20.91052977 | 30.26291062 | 24.76110859 | 26.94298191 | -0.462171374 | 0.718277927 | 0.3208175 |
| <b>fadK</b> | gi 49175990 ref NC_000913.2 | + | 1781055 | 1782701 | 59.05312371 | 65.56595552 | 66.08739819 | 56.19134011 | 62.79998612 | 0.007291046  | 0.016674175 | 0         |
| <b>ppsA</b> | gi 49175990 ref NC_000913.2 | - | 1782758 | 1785136 | 1638.05537  | 1635.570884 | 787.1715741 | 745.825738  | 995.6878016 | 0.952610058  | 4.945288018 | 3.6836785 |
| <b>ppsR</b> | gi 49175990 ref NC_000913.2 | + | 1785469 | 1786302 | 558.7717193 | 501.4472324 | 266.9553962 | 207.9270961 | 365.0370425 | 0.9325524    | 3.908827293 | 2.7803555 |
| <b>aroH</b> | gi 49175990 ref NC_000913.2 | + | 1786459 | 1787505 | 332.9205782 | 356.2053438 | 178.0893679 | 160.6127137 | 226.1952464 | 0.85834582   | 3.814241864 | 2.7012571 |
| <b>ydiE</b> | gi 49175990 ref NC_000913.2 | + | 1787637 | 1787828 | 222.3430446 | 204.1697826 | 89.5953971  | 87.74216382 | 139.6511002 | 1.013704879  | 4.26191027  | 3.0849652 |
| <b>ydiU</b> | gi 49175990 ref NC_000913.2 | - | 1787832 | 1789268 | 1113.221285 | 1061.863015 | 611.4985407 | 603.1617072 | 575.5381458 | 0.874482416  | 4.517699017 | 3.3091851 |
| <b>cdgR</b> | gi 49175990 ref NC_000913.2 | - | 1789331 | 1790044 | 117.6320449 | 133.0167241 | 174.7884848 | 239.7018973 | 229.8259701 | -0.805683387 | 2.782614977 | 1.8357082 |
| <b>nlpC</b> | gi 49175990 ref NC_000913.2 | - | 1790291 | 1790755 | 385.1720836 | 427.4583398 | 365.2599116 | 347.8001702 | 461.7685583 | 0.033727589  | 0.092015571 | 0.023893  |
| <b>btuD</b> | gi 49175990 ref NC_000913.2 | - | 1790833 | 1791582 | 636.5414137 | 657.28043   | 582.7125683 | 667.9932169 | 575.5801841 | 0.079941894  | 0.16759897  | 0.0527977 |
| <b>btuE</b> | gi 49175990 ref NC_000913.2 | - | 1791582 | 1792133 | 707.1681211 | 739.9203421 | 661.9216326 | 649.144503  | 629.3628823 | 0.157137835  | 0.357015749 | 0.1413425 |
| <b>btuC</b> | gi 49175990 ref NC_000913.2 | - | 1792196 | 1793176 | 329.726311  | 357.1606758 | 368.6548325 | 366.5617577 | 333.3003889 | -0.060812897 | 0.082646173 | 0.0209983 |
| <b>ihfA</b> | gi 49175990 ref NC_000913.2 | - | 1793277 | 1793576 | 3938.37626  | 4293.187017 | 5550.981015 | 5035.265128 | 5918.098233 | -0.430436973 | 1.148812852 | 0.5881165 |
| <b>pheT</b> | gi 49175990 ref NC_000913.2 | - | 1793581 | 1795968 | 8481.242338 | 8535.957038 | 10592.71833 | 10231.69935 | 11626.60436 | -0.348838446 | 0.863848059 | 0.4077485 |
| <b>pheS</b> | gi 49175990 ref NC_000913.2 | - | 1795983 | 1796966 | 1744.140603 | 1703.946893 | 1596.383544 | 1094.697744 | 1435.727796 | 0.341583876  | 0.793635568 | 0.3647067 |
| <b>pheM</b> | gi 49175990 ref NC_000913.2 | - | 1797250 | 1797294 | 36.54328765 | 37.04161719 | 33.81199986 | 38.24416966 | 54.60796925 | -0.210483646 | 0.27337433  | 0.1020023 |

|      |                             |   |         |         |             |             |             |             |              |              |             |           |
|------|-----------------------------|---|---------|---------|-------------|-------------|-------------|-------------|--------------|--------------|-------------|-----------|
| rpIT | gi 49175990 ref NC_000913.2 | - | 1797417 | 1797773 | 8685.700149 | 10420.47029 | 6037.738874 | 6052.358183 | 10075.64339  | 0.329892647  | 0.825118032 | 0.3831114 |
| rpml | gi 49175990 ref NC_000913.2 | - | 1797826 | 1798023 | 5090.020988 | 5446.249391 | 3532.827236 | 3673.200648 | 5621.366858  | 0.277812819  | 0.664148958 | 0.2977686 |
| infC | gi 49175990 ref NC_000913.2 | - | 1798120 | 1798662 | 22787.23117 | 23488.85497 | 16490.22487 | 15173.87952 | 20735.92952  | 0.396914954  | 1.05238643  | 0.5260812 |
| thrS | gi 49175990 ref NC_000913.2 | - | 1798666 | 1800594 | 15630.49778 | 15712.73396 | 14505.3158  | 14532.36054 | 16057.4697   | 0.056656673  | 0.103724758 | 0.0277229 |
| yniD | gi 49175990 ref NC_000913.2 | + | 1803189 | 1803296 | 84.9786169  | 91.20243086 | 114.8986166 | 100.9397114 | 92.16187199  | -0.220856796 | 0.420276915 | 0.171766  |
| ydiY | gi 49175990 ref NC_000913.2 | - | 1803349 | 1804107 | 245.8324745 | 324.9549462 | 242.5213452 | 194.2713288 | 253.3135834  | 0.276664546  | 0.738314584 | 0.3324689 |
| pfkB | gi 49175990 ref NC_000913.2 | + | 1804394 | 1805323 | 713.2768632 | 658.1781774 | 665.348707  | 618.8005246 | 507.3589971  | 0.219536181  | 0.44308043  | 0.1817004 |
| ydiZ | gi 49175990 ref NC_000913.2 | + | 1805424 | 1805714 | 331.2056636 | 335.2847306 | 573.4139246 | 511.1379788 | 374.0306119  | -0.532845588 | 1.663251028 | 0.9520618 |
| yniA | gi 49175990 ref NC_000913.2 | + | 1805820 | 1806680 | 1214.47182  | 1277.516778 | 3419.122356 | 2986.655512 | 2248.460264  | -1.203854004 | 5.762514536 | 4.3956382 |
| yniB | gi 49175990 ref NC_000913.2 | - | 1806721 | 1807257 | 454.6285592 | 496.788006  | 464.8483202 | 483.3191934 | 568.4506164  | -0.106148603 | 0.158099717 | 0.0488334 |
| yniC | gi 49175990 ref NC_000913.2 | + | 1807404 | 1808072 | 417.3974287 | 377.0257688 | 370.1822374 | 314.2434204 | 425.9383902  | 0.116089984  | 0.188282679 | 0.0610389 |
| ydiM | gi 49175990 ref NC_000913.2 | + | 1808235 | 1808825 | 256.1781156 | 311.6204341 | 222.249984  | 198.8745399 | 339.1699555  | 0.1279087    | 0.291415401 | 0.1120598 |
| ydiN | gi 49175990 ref NC_000913.2 | + | 1808958 | 1810349 | 233.3614602 | 239.359134  | 210.9554192 | 207.4469876 | 212.0000491  | 0.166683188  | 0.343170303 | 0.1341942 |
| ydiO | gi 49175990 ref NC_000913.2 | - | 1810353 | 1811156 | 2.833221706 | 6.69422259  | 5.264224634 | 7.692437469 | 1.268510481  | -0.054880268 | 0           | 0         |
| cedA | gi 49175990 ref NC_000913.2 | - | 1811445 | 1811687 | 280.9567623 | 322.993481  | 210.4136579 | 239.9836692 | 286.8256469  | 0.267645936  | 0.712480904 | 0.3184473 |
| katE | gi 49175990 ref NC_000913.2 | + | 1811891 | 1814152 | 941.2342546 | 829.1224801 | 606.0088983 | 638.8097073 | 478.2286652  | 0.646084007  | 2.383447352 | 1.5059267 |
| chbG | gi 49175990 ref NC_000913.2 | - | 1814410 | 1815159 | 133.4296332 | 149.1601721 | 155.1343866 | 159.1180467 | 140.3630686  | -0.113433614 | 0.165577816 | 0.0523163 |
| chbF | gi 49175990 ref NC_000913.2 | - | 1815172 | 1816524 | 70.66502747 | 91.26629189 | 99.40592222 | 92.02343613 | 98.68769848  | -0.284986961 | 0.523495466 | 0.2242744 |
| chbR | gi 49175990 ref NC_000913.2 | - | 1816629 | 1817471 | 68.86211257 | 65.51678578 | 81.65942827 | 110.7720176 | 99.80561823  | -0.539647514 | 1.474497103 | 0.8075823 |
| chbA | gi 49175990 ref NC_000913.2 | - | 1817479 | 1817829 | 61.3754029  | 56.00687424 | 80.49077717 | 120.74436   | 99.85614183  | -0.775266316 | 2.518039463 | 1.6199106 |
| chbC | gi 49175990 ref NC_000913.2 | - | 1817880 | 1819238 | 122.4540194 | 150.14635   | 220.1275933 | 175.2613432 | 248.7101525  | -0.679570715 | 2.101377458 | 1.2782145 |
| chbB | gi 49175990 ref NC_000913.2 | - | 1819323 | 1819643 | 99.42164682 | 109.2587947 | 147.9789524 | 300.0446837 | 296.8631608  | -1.291145006 | 4.770643342 | 3.5303359 |
| osmE | gi 49175990 ref NC_000913.2 | - | 1819942 | 1820280 | 6054.326915 | 6235.524262 | 9287.528992 | 8451.113653 | 6763.338279  | -0.403992221 | 1.038622887 | 0.5202286 |
| nadE | gi 49175990 ref NC_000913.2 | + | 1820482 | 1821309 | 1008.081556 | 1077.113835 | 1451.10372  | 1494.288208 | 1171.429201  | -0.401384657 | 1.102106169 | 0.5585177 |
| cho  | gi 49175990 ref NC_000913.2 | + | 1821539 | 1822426 | 269.856151  | 285.9143083 | 262.7906754 | 265.7256132 | 270.316746   | 0.052853288  | 0.108004591 | 0.0290579 |
| ves  | gi 49175990 ref NC_000913.2 | - | 1822386 | 1822961 | 407.3380992 | 440.7442578 | 649.667564  | 570.7937979 | 592.3292204  | -0.516064238 | 1.670082575 | 0.9577953 |
| spy  | gi 49175990 ref NC_000913.2 | - | 1823164 | 1823649 | 164.1478982 | 195.7298537 | 100.3901474 | 254.926176  | 211.7847083  | -0.128256965 | 0.081530934 | 0.0204431 |
| astE | gi 49175990 ref NC_000913.2 | - | 1823979 | 1824947 | 22.79911667 | 20.87508081 | 34.28750577 | 35.7474411  | 24.89982788  | -0.518059345 | 0.930889667 | 0.4525949 |
| astB | gi 49175990 ref NC_000913.2 | - | 1824940 | 1826283 | 59.64133218 | 67.47145689 | 71.11219294 | 61.68415986 | 54.03708826  | 0.024357509  | 0.027161489 | 0.0014853 |
| astD | gi 49175990 ref NC_000913.2 | - | 1826280 | 1827758 | 48.83451997 | 57.98540161 | 54.5375225  | 68.10237284 | 46.24016592  | -0.096782108 | 0.085644216 | 0.0221491 |
| astA | gi 49175990 ref NC_000913.2 | - | 1827755 | 1828789 | 36.75147558 | 21.73427982 | 30.43201533 | 26.99142861 | 30.26056115  | 0.056268463  | 0           | 0         |
| astC | gi 49175990 ref NC_000913.2 | - | 1828786 | 1830006 | 40.71438154 | 33.18921625 | 44.8453658  | 45.83688296 | 32.77326382  | -0.126794121 | 0.185530169 | 0.0597732 |
| xthA | gi 49175990 ref NC_000913.2 | + | 1830452 | 1831258 | 483.6917742 | 522.4276866 | 437.0505239 | 318.7708813 | 399.2665532  | 0.385089819  | 1.079979479 | 0.5452469 |
| ydiX | gi 49175990 ref NC_000913.2 | + | 1831425 | 1832135 | 236.2962081 | 260.2859128 | 385.0090578 | 292.0609121 | 526.5205092  | -0.708082509 | 2.206984762 | 1.3582462 |
| ydiY | gi 49175990 ref NC_000913.2 | + | 1832140 | 1832817 | 324.997409  | 319.1244834 | 446.9240505 | 214.9153289 | 403.5354591  | -0.119013537 | 0.218689338 | 0.5758113 |
| ydiZ | gi 49175990 ref NC_000913.2 | + | 1832832 | 1833539 | 295.6660608 | 319.1662864 | 458.2085757 | 200.3488013 | 347.6672461  | -0.108777704 | 0.181422754 | 0.0580027 |
| ynjA | gi 49175990 ref NC_000913.2 | + | 1833539 | 1834087 | 144.7544533 | 163.4120612 | 177.7897414 | 84.76330416 | 160.1568283  | 0.131416629  | 0.190584834 | 0.0615393 |
| ynjB | gi 49175990 ref NC_000913.2 | + | 1834097 | 1835263 | 271.2625896 | 274.4964887 | 378.9811458 | 145.5489907 | 342.8596092  | -0.062009013 | 0.102261229 | 0.0270074 |
| ynjC | gi 49175990 ref NC_000913.2 | + | 1835236 | 1836771 | 207.9720234 | 224.1830778 | 327.233264  | 172.1289483 | 245.6891165  | -0.187410491 | 0.348482013 | 0.1380683 |
| ynjD | gi 49175990 ref NC_000913.2 | + | 1836771 | 1837424 | 126.5274799 | 139.6565169 | 177.4233358 | 92.45958533 | 129.0590302  | 0.011871874  | 0           | 0         |
| ynjE | gi 49175990 ref NC_000913.2 | + | 1837491 | 1838798 | 805.8382626 | 787.3788786 | 1433.174741 | 616.373382  | 1096.959363  | -0.364975946 | 0.821741509 | 0.3803246 |
| ynjF | gi 49175990 ref NC_000913.2 | - | 1838807 | 1839427 | 229.8358393 | 266.0063271 | 300.8491929 | 251.3756865 | 298.2814885  | -0.208620673 | 0.394176815 | 0.1571967 |
| nudG | gi 49175990 ref NC_000913.2 | + | 1839514 | 1839921 | 116.170405  | 112.0600811 | 82.81859246 | 87.58008909 | 112.9714642  | 0.269242127  | 0.586601408 | 0.2584339 |
| ynjH | gi 49175990 ref NC_000913.2 | - | 1839887 | 1840159 | 86.71932994 | 98.82287982 | 82.8332711  | 95.30112387 | 106.3704348  | -0.055965652 | 0.037379183 | 0.0039338 |
| gdhA | gi 49175990 ref NC_000913.2 | + | 1840395 | 1841738 | 1244.879511 | 1265.152734 | 865.0014745 | 875.5774476 | 833.5230203  | 0.546896975  | 1.993790171 | 1.1941083 |
| ynjI | gi 49175990 ref NC_000913.2 | - | 1841855 | 1842895 | 176.71483   | 172.8524941 | 124.3225834 | 152.4955123 | 182.4842281  | 0.180909411  | 0.359986331 | 0.1424431 |
| topB | gi 49175990 ref NC_000913.2 | - | 1843023 | 1844984 | 1717.003565 | 1406.573505 | 2400.482921 | 2114.472485 | 1786.149837  | -0.387992214 | 1.098914478 | 0.5577652 |
| selD | gi 49175990 ref NC_000913.2 | - | 1844989 | 1846032 | 1923.094173 | 1688.699445 | 3027.216597 | 2329.810639 | 1827.842892  | -0.368033363 | 0.962396283 | 0.4683213 |
| ydiA | gi 49175990 ref NC_000913.2 | - | 1846149 | 1846700 | 964.3971194 | 895.6336113 | 1128.330974 | 1002.327938 | 896.5250691  | -0.098017347 | 0.220440134 | 0.0765031 |
| sppA | gi 49175990 ref NC_000913.2 | + | 1846861 | 1848717 | 1325.497019 | 1406.695493 | 1144.777648 | 994.691987  | 1026.9746604 | 0.297746604  | 0.807117146 | 0.371975  |
| ansA | gi 49175990 ref NC_000913.2 | + | 1848884 | 1849900 | 547.5954756 | 561.3459554 | 472.2408769 | 401.6660671 | 519.1102385  | 0.253793631  | 0.627660751 | 0.2809088 |
| pncA | gi 49175990 ref NC_000913.2 | + | 1849911 | 1850552 | 328.6292735 | 338.1414013 | 303.8066612 | 296.0307774 | 305.0976763  | 0.141050574  | 0.295088841 | 0.1134712 |
| ydiE | gi 49175990 ref NC_000913.2 | - | 1850645 | 1852003 | 60.32897721 | 66.51337649 | 68.88794794 | 65.0719729  | 66.20318207  | -0.081741465 | 0.088896646 | 0.0234224 |
| ydiF | gi 49175990 ref NC_000913.2 | - | 1852120 | 1852878 | 98.8211285  | 107.3584056 | 65.77004242 | 152.1365782 | 164.3698059  | -0.349602249 | 0.494166765 | 0.2099578 |
| ydiG | gi 49175990 ref NC_000913.2 | - | 1853015 | 1853995 | 37.30269124 | 35.1238187  | 35.10001987 | 50.25529113 | 43.74090157  | -0.251807412 | 0.391167657 | 0.1558183 |
| ydiH | gi 49175990 ref NC_000913.2 | - | 1854005 | 1854952 | 19.86346269 | 6.527958832 | 18.44262391 | 16.83314561 | 15.76382075  | -0.271133299 | 0.387895174 | 0.1543669 |
| ydiI | gi 49175990 ref NC_000913.2 | - | 1854957 | 1855793 | 12.07617649 | 10.42636026 | 11.28904228 | 30.83700445 | 11.47213095  | -0.668158826 | 0.803753294 | 0.3705088 |

|             |                             |   |         |         |             |             |             |             |             |              |             |           |
|-------------|-----------------------------|---|---------|---------|-------------|-------------|-------------|-------------|-------------|--------------|-------------|-----------|
| <b>ydjJ</b> | gi 49175990 ref NC_000913.2 | - | 1855814 | 1856857 | 12.46689751 | 14.26085094 | 22.92327518 | 37.71934282 | 19.32633998 | -1.008928025 | 1.948387431 | 1.1616638 |
| <b>ydjK</b> | gi 49175990 ref NC_000913.2 | - | 1856874 | 1858253 | 21.78164725 | 26.63086208 | 39.26961116 | 29.27334071 | 30.37651622 | -0.452213442 | 0.722121603 | 0.3230606 |
| <b>ydjL</b> | gi 49175990 ref NC_000913.2 | - | 1858280 | 1859356 | 39.82690335 | 25.54289789 | 68.16689797 | 54.96098326 | 44.03166993 | -0.707971778 | 1.976836922 | 1.1831638 |
| <b>yeaC</b> | gi 49175990 ref NC_000913.2 | - | 1859726 | 1859998 | 231.2858802 | 251.7322738 | 242.6153829 | 434.0960847 | 242.7255468 | -0.37049646  | 0.708082542 | 0.3157779 |
| <b>msrB</b> | gi 49175990 ref NC_000913.2 | - | 1860040 | 1860453 | 479.9969466 | 504.3685231 | 502.5117406 | 817.6307414 | 496.2056643 | -0.318629212 | 0.659849058 | 0.2968642 |
| <b>gapA</b> | gi 49175990 ref NC_000913.2 | + | 1860795 | 1861790 | 47068.62175 | 51213.88632 | 64977.18674 | 54772.62309 | 62542.22261 | -0.313134692 | 0.693867361 | 0.3103556 |
| <b>yeaD</b> | gi 49175990 ref NC_000913.2 | + | 1861874 | 1862758 | 654.5279886 | 615.4454028 | 1155.199937 | 894.7151308 | 673.6075097 | -0.485904772 | 1.504653946 | 0.8282268 |
| <b>yeaE</b> | gi 49175990 ref NC_000913.2 | - | 1862806 | 1863660 | 438.1593298 | 488.2486463 | 652.2754989 | 605.4169604 | 549.8511044 | -0.388105845 | 1.058814905 | 0.528805  |
| <b>mipA</b> | gi 49175990 ref NC_000913.2 | - | 1863750 | 1864496 | 2359.924214 | 2354.578007 | 1089.024736 | 947.5911415 | 1107.031228 | 1.172960297  | 6.834897028 | 5.3355723 |
| <b>yeaG</b> | gi 49175990 ref NC_000913.2 | + | 1864932 | 1866866 | 1603.931863 | 1624.179888 | 2613.907055 | 2653.310282 | 1435.480535 | -0.457658161 | 1.085952977 | 0.5501233 |
| <b>yeaH</b> | gi 49175990 ref NC_000913.2 | + | 1866979 | 1868262 | 700.5406129 | 668.6416464 | 1194.409376 | 1304.394556 | 594.2868052 | -0.571961146 | 1.501882623 | 0.8269714 |
| <b>yeal</b> | gi 49175990 ref NC_000913.2 | + | 1868409 | 1869884 | 26.91726528 | 30.41657625 | 22.14479176 | 45.57603039 | 32.57431112 | -0.252682102 | 0.271463117 | 0.1008814 |
| <b>yeaJ</b> | gi 49175990 ref NC_000913.2 | + | 1870065 | 1871555 | 447.3141351 | 452.1110078 | 242.2751607 | 216.8551423 | 390.6662572 | 0.654623824  | 2.174200508 | 1.3299547 |
| <b>yeaK</b> | gi 49175990 ref NC_000913.2 | + | 1871598 | 1872101 | 540.0927985 | 542.3401917 | 617.5815011 | 494.6643848 | 548.5576815 | -0.024332758 | 0.048806721 | 0.0081378 |
| <b>yoal</b> | gi 49175990 ref NC_000913.2 | - | 1872102 | 1872206 | 56.44888017 | 48.39185503 | 50.76598642 | 54.96713347 | 61.56150044 | -0.076352193 | 0.104471436 | 0.0277229 |
| <b>yeaL</b> | gi 49175990 ref NC_000913.2 | + | 1872376 | 1872822 | 147.1029447 | 141.5024737 | 175.6833293 | 200.966189  | 210.7439324 | -0.441237004 | 1.194878595 | 0.6175829 |
| <b>yeaM</b> | gi 49175990 ref NC_000913.2 | - | 1872779 | 1873600 | 153.2664721 | 124.3414739 | 168.0420844 | 151.390738  | 141.4941612 | -0.11283033  | 0.262169535 | 0.0969211 |
| <b>yeaN</b> | gi 49175990 ref NC_000913.2 | + | 1873697 | 1874878 | 164.0244292 | 164.3138685 | 182.0450561 | 189.5041785 | 202.9262158 | -0.225455364 | 0.458089617 | 0.1917807 |
| <b>yeaO</b> | gi 49175990 ref NC_000913.2 | + | 1874933 | 1875280 | 263.006402  | 270.7045992 | 436.4409259 | 300.7795539 | 321.013351  | -0.388475166 | 1.044023425 | 0.5210963 |
| <b>yeaF</b> | gi 49175990 ref NC_000913.2 | - | 1875302 | 1875556 | 146.1978893 | 154.8378976 | 147.7468454 | 162.5757622 | 177.0717091 | -0.123725077 | 0.177623049 | 0.0561466 |
| <b>yeaP</b> | gi 49175990 ref NC_000913.2 | + | 1875739 | 1876764 | 723.3834525 | 800.734982  | 647.7556564 | 619.0803002 | 774.8112017 | 0.145119694  | 0.349891235 | 0.1391697 |
| <b>yoaK</b> | gi 49175990 ref NC_000913.2 | + | 1876797 | 1876895 | 94.95706439 | 106.416249  | 78.33004125 | 69.69806799 | 88.43182521 | 0.338669393  | 0.846908286 | 0.3971622 |
| <b>yeaJ</b> | gi 49175990 ref NC_000913.2 | + | 1876898 | 1876972 | 42.75042872 | 32.22065796 | 35.40514047 | 34.6238119  | 21.60193631 | 0.334451408  | 0.474011059 | 0.1991532 |
| <b>yeaQ</b> | gi 49175990 ref NC_000913.2 | - | 1877031 | 1877279 | 1662.672266 | 1656.465678 | 2562.540304 | 174.654017  | 1418.483778 | -0.209036186 | 0.430821135 | 0.1762871 |
| <b>yoaG</b> | gi 49175990 ref NC_000913.2 | - | 1877427 | 1877609 | 57.10516399 | 48.38847649 | 39.77258801 | 10.76032486 | 66.42152648 | 0.453208522  | 0.554096612 | 0.2401889 |
| <b>yeaR</b> | gi 49175990 ref NC_000913.2 | - | 1877613 | 1877972 | 113.4485184 | 117.7864625 | 51.80649787 | 17.75361233 | 169.6527411 | 0.504896647  | 0.622569271 | 0.2777086 |
| <b>leuE</b> | gi 49175990 ref NC_000913.2 | - | 1878145 | 1878783 | 340.9927081 | 379.9691109 | 359.2504347 | 283.9984927 | 377.7962652 | 0.072137991  | 0.149507036 | 0.0453478 |
| <b>dmlR</b> | gi 49175990 ref NC_000913.2 | - | 1878910 | 1879833 | 512.7864705 | 542.364128  | 839.8060591 | 689.8925399 | 974.4078742 | -0.669102203 | 2.446180987 | 1.5580772 |
| <b>dmlA</b> | gi 49175990 ref NC_000913.2 | + | 1879936 | 1881021 | 89.24118938 | 101.6725967 | 160.2383465 | 154.6770242 | 137.0275463 | -0.669120835 | 2.263802076 | 1.4050162 |
| <b>yeaV</b> | gi 49175990 ref NC_000913.2 | + | 1881212 | 1882657 | 20.49592756 | 25.68482256 | 35.67010277 | 35.81382117 | 29.30833768 | -0.556563703 | 1.038092913 | 0.5202286 |
| <b>yeaW</b> | gi 49175990 ref NC_000913.2 | + | 1882689 | 1883813 | 19.38134161 | 21.86310948 | 47.1174664  | 33.79130621 | 35.98989592 | -0.912657397 | 2.29892978  | 1.4348706 |
| <b>yeaX</b> | gi 49175990 ref NC_000913.2 | + | 1883869 | 1884834 | 44.02045021 | 33.16944074 | 36.1747352  | 34.92402369 | 50.19290477 | -0.041982876 | 0.061913886 | 0.0128622 |
| <b>rmd</b>  | gi 49175990 ref NC_000913.2 | - | 1884888 | 1886015 | 497.1191182 | 509.1057898 | 401.2149506 | 421.6549588 | 500.0065449 | 0.18020068   | 0.428218534 | 0.1754896 |
| <b>fadD</b> | gi 49175990 ref NC_000913.2 | - | 1886805 | 1887770 | 524.6000713 | 484.3635383 | 482.2005246 | 530.3304332 | 592.046071  | -0.08054298  | 0.149319932 | 0.0453478 |
| <b>yeaY</b> | gi 49175990 ref NC_000913.2 | - | 1887975 | 1888556 | 717.3971233 | 721.8556006 | 713.5378652 | 706.2559618 | 630.5956815 | 0.076913567  | 0.142105686 | 0.0427363 |
| <b>yeaZ</b> | gi 49175990 ref NC_000913.2 | - | 1888596 | 1889291 | 768.2379905 | 836.8202944 | 728.3360837 | 730.9647998 | 703.3917568 | 0.143394331  | 0.343737764 | 0.134534  |
| <b>yoaA</b> | gi 49175990 ref NC_000913.2 | - | 1889349 | 1891259 | 918.9434461 | 858.5938185 | 827.3746806 | 767.9754397 | 690.0851962 | 0.238626577  | 0.537974428 | 0.2314721 |
| <b>yoaB</b> | gi 49175990 ref NC_000913.2 | + | 1891391 | 1891735 | 663.3970761 | 743.7521301 | 468.4144734 | 466.4352282 | 483.427974  | 0.556627855  | 2.107967032 | 1.2830803 |
| <b>yoaC</b> | gi 49175990 ref NC_000913.2 | + | 1892157 | 1892456 | 98.46095884 | 74.93919016 | 98.15469194 | 183.213279  | 125.7803728 | -0.632184588 | 1.718775473 | 0.9947874 |
| <b>yoaH</b> | gi 49175990 ref NC_000913.2 | - | 1892576 | 1892755 | 570.248821  | 595.5478495 | 571.0462959 | 582.0425464 | 728.7675552 | -0.118700149 | 0.191645288 | 0.062169  |
| <b>pabB</b> | gi 49175990 ref NC_000913.2 | + | 1892829 | 1894190 | 347.5458754 | 359.03912   | 333.9232186 | 387.97459   | 468.4957501 | -0.183705368 | 0.325963418 | 0.1268477 |
| <b>nudL</b> | gi 49175990 ref NC_000913.2 | + | 1894194 | 1894772 | 280.0265741 | 289.7031724 | 319.3181714 | 364.4636221 | 452.7606195 | -0.427428542 | 1.121155192 | 0.5689069 |
| <b>sdaA</b> | gi 49175990 ref NC_000913.2 | + | 1894956 | 1896320 | 2172.957692 | 2288.117273 | 2153.393923 | 2226.560069 | 2179.546864 | 0.020144367  | 0.04965396  | 0.0081378 |
| <b>adrB</b> | gi 49175990 ref NC_000913.2 | + | 1896451 | 1898049 | 144.7292465 | 131.9839724 | 180.2100538 | 164.8949191 | 170.5281642 | -0.297147131 | 0.713988339 | 0.3184473 |
| <b>yoaE</b> | gi 49175990 ref NC_000913.2 | - | 1898053 | 1899609 | 881.5052443 | 874.7687932 | 1010.573047 | 839.997271  | 989.275923  | -0.101952469 | 0.199446835 | 0.0660742 |
| <b>manX</b> | gi 49175990 ref NC_000913.2 | + | 1900072 | 1901043 | 3316.588096 | 3249.291846 | 8641.614298 | 8199.940299 | 6580.462863 | -1.238486975 | 6.51083148  | 5.0501362 |
| <b>manY</b> | gi 49175990 ref NC_000913.2 | + | 1901106 | 1901906 | 2972.853533 | 2783.862424 | 7932.970597 | 7632.544975 | 5434.195821 | -1.262169373 | 6.499746929 | 5.0470371 |
| <b>manZ</b> | gi 49175990 ref NC_000913.2 | + | 1901919 | 1902770 | 4228.302916 | 4239.956742 | 11642.30972 | 9792.141279 | 8671.328095 | -1.232733201 | 6.248533236 | 4.8240674 |
| <b>yobD</b> | gi 49175990 ref NC_000913.2 | + | 1902825 | 1903283 | 167.3591813 | 157.6405796 | 286.2310376 | 265.7420367 | 253.6349513 | -0.711415119 | 2.739194284 | 1.8013377 |
| <b>yebN</b> | gi 49175990 ref NC_000913.2 | + | 1903712 | 1904278 | 283.7419949 | 300.160942  | 350.1487015 | 301.8416055 | 374.465365  | -0.234639015 | 0.505599002 | 0.1521007 |
| <b>rlmA</b> | gi 49175990 ref NC_000913.2 | - | 1904275 | 1905084 | 582.9158669 | 600.2904022 | 543.3818278 | 575.3165206 | 742.1473562 | -0.08174072  | 0.11251744  | 0.0313912 |
| <b>cspC</b> | gi 49175990 ref NC_000913.2 | - | 1905250 | 1905459 | 10702.02763 | 11857.49598 | 13185.76247 | 14225.21205 | 17634.36682 | -0.437111239 | 1.046812518 | 0.5221887 |
| <b>yobF</b> | gi 49175990 ref NC_000913.2 | - | 1905472 | 1905615 | 9376.664445 | 11192.66474 | 11484.23662 | 14142.25522 | 19316.6775  | -0.586637688 | 1.432590481 | 0.7793247 |
| <b>yebO</b> | gi 49175990 ref NC_000913.2 | - | 1906285 | 1906572 | 1253.215127 | 1226.192392 | 1003.109088 | 911.7299921 | 1133.814043 | 0.288956266  | 0.741431287 | 0.3345498 |
| <b>mgrB</b> | gi 49175990 ref NC_000913.2 | - | 1906647 | 1906790 | 1340.629233 | 1427.592996 | 1143.687593 | 1125.683832 | 1175.53281  | 0.260130094  | 0.67860366  | 0.3037385 |
| <b>yobH</b> | gi 49175990 ref NC_000913.2 | + | 1906949 | 1907188 | 141.4705365 | 167.2300278 | 67.44581748 | 168.0044657 | 223.4486324 | -0.048779487 | 0.019542461 | 0         |
| <b>kdgR</b> | gi 49175990 ref NC_000913.2 | - | 1907332 | 1908123 | 563.4323429 | 567.0363284 | 567.6772417 | 515.8728494 | 567.5379718 | 0.040051362  | 0.070171915 | 0.0170551 |

|      |                             |   |         |         |             |             |             |             |             |              |             |           |
|------|-----------------------------|---|---------|---------|-------------|-------------|-------------|-------------|-------------|--------------|-------------|-----------|
| yebQ | gi 49175990 ref NC_000913.2 | + | 1908300 | 1909673 | 175.4230921 | 214.7381628 | 151.7576608 | 178.1557261 | 173.8123305 | 0.182550919  | 0.454909541 | 0.1895839 |
| htpX | gi 49175990 ref NC_000913.2 | - | 1909719 | 1910600 | 2777.626575 | 2787.695005 | 2496.896303 | 2347.815405 | 2616.892766 | 0.161749528  | 0.330697285 | 0.1302079 |
| prc  | gi 49175990 ref NC_000913.2 | - | 1910792 | 1912840 | 3367.819589 | 3190.387339 | 2505.376612 | 2500.34996  | 3164.033589 | 0.269592026  | 0.641629294 | 0.286746  |
| proQ | gi 49175990 ref NC_000913.2 | - | 1912860 | 1913558 | 3261.908957 | 3007.060673 | 2412.386338 | 2223.543859 | 3067.48417  | 0.294740757  | 0.69555778  | 0.3103556 |
| msrC | gi 49175990 ref NC_000913.2 | - | 1913655 | 1914152 | 1379.586983 | 1540.643654 | 817.5972452 | 809.6113899 | 957.7136911 | 0.741076216  | 3.418370644 | 2.3647587 |
| yebS | gi 49175990 ref NC_000913.2 | + | 1914282 | 1915565 | 668.8614554 | 799.8218063 | 672.9088049 | 685.0773574 | 742.4611678 | 0.040369377  | 0.128440893 | 0.0374351 |
| yebT | gi 49175990 ref NC_000913.2 | + | 1915534 | 1918167 | 1220.950925 | 1223.35425  | 1029.333299 | 1007.882437 | 939.0224075 | 0.303517552  | 0.801191608 | 0.3696785 |
| rsmF | gi 49175990 ref NC_000913.2 | + | 1918247 | 1919686 | 422.1125202 | 421.7117559 | 380.8352148 | 344.4149091 | 424.9105524 | 0.137885291  | 0.276925816 | 0.1038347 |
| yebV | gi 49175990 ref NC_000913.2 | + | 1919804 | 1920040 | 613.4636404 | 705.7716979 | 729.1697079 | 787.1893758 | 997.9091359 | -0.375209637 | 0.906283198 | 0.4362479 |
| yebW | gi 49175990 ref NC_000913.2 | + | 1920145 | 1920336 | 172.1085201 | 179.5274068 | 187.8093261 | 153.7656467 | 162.7211401 | 0.067766852  | 0.109043418 | 0.0294058 |
| pphA | gi 49175990 ref NC_000913.2 | - | 1920337 | 1920993 | 281.6233407 | 262.1129213 | 210.2666382 | 274.3739358 | 228.920723  | 0.194205479  | 0.398309635 | 0.1602017 |
| yebY | gi 49175990 ref NC_000913.2 | - | 1921389 | 1921730 | 802.4405694 | 841.5514147 | 823.7373256 | 749.0746476 | 825.5321082 | 0.035745222  | 0.073766254 | 0.3107681 |
| yebZ | gi 49175990 ref NC_000913.2 | - | 1921743 | 1922615 | 1477.293283 | 1416.14497  | 1443.437051 | 1375.738398 | 1466.055385 | 0.025285858  | 0.033117261 | 0.0030156 |
| yobA | gi 49175990 ref NC_000913.2 | - | 1922619 | 1922993 | 1015.377153 | 979.234612  | 955.63703   | 1030.313291 | 1066.668221 | -0.028434911 | 0.043913651 | 0.0060195 |
| holE | gi 49175990 ref NC_000913.2 | + | 1923132 | 1923362 | 426.2371779 | 465.4437129 | 284.0202626 | 391.2392091 | 470.6245454 | 0.191704585  | 0.468199947 | 0.1963434 |
| yobB | gi 49175990 ref NC_000913.2 | + | 1923464 | 1924120 | 325.8606545 | 361.9210024 | 325.6382024 | 369.9411589 | 390.2052506 | -0.095612408 | 0.123949471 | 0.0368896 |
| exoX | gi 49175990 ref NC_000913.2 | + | 1924144 | 1924806 | 525.0476156 | 511.93274   | 466.0080994 | 493.3052241 | 514.7809188 | 0.077262262  | 0.147334793 | 0.0441959 |
| ptrB | gi 49175990 ref NC_000913.2 | - | 1924803 | 1926863 | 494.0771236 | 489.1442446 | 457.4029088 | 432.7682125 | 406.2064863 | 0.191933215  | 0.416244386 | 0.1703178 |
| yebE | gi 49175990 ref NC_000913.2 | - | 1927072 | 1927731 | 364.4650836 | 390.3993305 | 457.3378926 | 456.1695632 | 369.348776  | -0.184302974 | 0.373618884 | 0.1468014 |
| yebF | gi 49175990 ref NC_000913.2 | - | 1928058 | 1928414 | 1433.480732 | 1485.518453 | 980.9890606 | 1207.189559 | 1027.612757 | 0.435388172  | 1.415805168 | 0.7692063 |
| yebG | gi 49175990 ref NC_000913.2 | - | 1928481 | 1928771 | 1780.321177 | 1959.503834 | 1129.436177 | 1839.436156 | 1797.839572 | 0.198812878  | 0.47277044  | 0.1985574 |
| purT | gi 49175990 ref NC_000913.2 | + | 1928905 | 1930083 | 170.2629084 | 174.7717291 | 391.4680074 | 432.0128938 | 141.2487368 | -0.88528393  | 2.232753543 | 1.3794752 |
| eda  | gi 49175990 ref NC_000913.2 | - | 1930139 | 1930780 | 894.1558482 | 879.5136975 | 929.7408504 | 726.5412798 | 553.5572395 | 0.290242452  | 0.612691524 | 0.2710778 |
| edd  | gi 49175990 ref NC_000913.2 | - | 1932628 | 1932628 | 585.6425184 | 567.9691059 | 988.3047735 | 768.0879738 | 649.9075632 | -0.453399024 | 1.399919785 | 0.7607065 |
| zwf  | gi 49175990 ref NC_000913.2 | - | 1932863 | 1934338 | 2886.657968 | 3007.119614 | 2904.227024 | 2638.273468 | 3173.176491 | 0.014635646  | 0.036860185 | 0.0039338 |
| yebK | gi 49175990 ref NC_000913.2 | + | 1934676 | 1935545 | 869.9520088 | 913.7379007 | 1402.713299 | 1380.298722 | 1671.097899 | -0.746457787 | 2.917768587 | 1.9483356 |
| pykA | gi 49175990 ref NC_000913.2 | + | 1935673 | 1937115 | 4464.398619 | 4352.020832 | 7154.365988 | 5668.800423 | 6589.032662 | -0.541723271 | 1.737371222 | 1.0087467 |
| lpxM | gi 49175990 ref NC_000913.2 | - | 1937246 | 1938217 | 807.2248364 | 760.767375  | 621.3420109 | 635.8033724 | 744.5774505 | 0.235842822  | 0.564205338 | 0.2463254 |
| yebA | gi 49175990 ref NC_000913.2 | - | 1938337 | 1939659 | 1607.807503 | 1587.125017 | 1721.301535 | 1855.532114 | 2058.166217 | -0.238230914 | 0.496396596 | 0.2105588 |
| znuA | gi 49175990 ref NC_000913.2 | - | 1939675 | 1940607 | 1362.571181 | 1262.259396 | 1258.48508  | 1491.031926 | 1537.73001  | -0.121116083 | 0.229456827 | 0.0808909 |
| znuC | gi 49175990 ref NC_000913.2 | + | 1940686 | 1941441 | 305.1279854 | 329.6146436 | 430.6559057 | 394.6450849 | 354.6855295 | -0.31288244  | 0.776419615 | 0.3557147 |
| znuB | gi 49175990 ref NC_000913.2 | + | 1941438 | 1942223 | 370.6863523 | 336.1860755 | 392.3067442 | 386.6779196 | 316.6164282 | -0.028151835 | 0.071162252 | 0.0170551 |
| ruvB | gi 49175990 ref NC_000913.2 | - | 1942370 | 1943380 | 754.9497259 | 691.418046  | 677.5641406 | 607.7605015 | 615.904408  | 0.208181526  | 0.436454439 | 0.1781431 |
| ruvA | gi 49175990 ref NC_000913.2 | - | 1943389 | 1944000 | 484.5340367 | 491.0545546 | 470.4151293 | 392.5823663 | 418.4603516 | 0.197345777  | 0.426986355 | 0.1748163 |
| yebB | gi 49175990 ref NC_000913.2 | + | 1944275 | 1944877 | 81.35859909 | 81.68082804 | 76.62401206 | 83.23806444 | 137.3010462 | -0.296197927 | 0.522143383 | 0.2535589 |
| ruvC | gi 49175990 ref NC_000913.2 | - | 1944879 | 1945400 | 945.537615  | 860.4812144 | 916.9447977 | 870.1851633 | 1034.018596 | -0.046988517 | 0.096657905 | 0.0259602 |
| yebC | gi 49175990 ref NC_000913.2 | - | 1945435 | 1946175 | 1957.709682 | 1762.796497 | 1908.361446 | 1596.645732 | 1564.99837  | 0.163549959  | 0.264183463 | 0.0969652 |
| nudB | gi 49175990 ref NC_000913.2 | - | 1946204 | 1946656 | 582.233354  | 608.8458368 | 698.0615791 | 514.8834232 | 550.9192858 | 0.026542861  | 0.031434199 | 0.0026877 |
| aspS | gi 49175990 ref NC_000913.2 | - | 1946774 | 1948546 | 2943.968181 | 2650.870159 | 3687.205055 | 3040.630595 | 2708.193853 | -0.140564978 | 0.332929238 | 0.1312548 |
| yecD | gi 49175990 ref NC_000913.2 | + | 1948856 | 1949422 | 398.3200205 | 376.0956078 | 411.0404848 | 367.8793486 | 399.3110087 | -0.008902833 | 0.028491222 | 0.0017411 |
| yecE | gi 49175990 ref NC_000913.2 | + | 1949419 | 1950237 | 158.4172002 | 154.8058542 | 227.6456524 | 198.519826  | 190.8451918 | -0.381920686 | 1.023678527 | 0.5114992 |
| yecN | gi 49175990 ref NC_000913.2 | + | 1950290 | 1950685 | 535.6837436 | 536.6402316 | 422.212283  | 442.8690851 | 467.6577782 | 0.267377782  | 0.709288188 | 0.3176227 |
| cmoA | gi 49175990 ref NC_000913.2 | + | 1950726 | 1951469 | 319.1621527 | 328.6435757 | 290.754591  | 238.8330624 | 194.4496862 | 0.435360157  | 1.166871353 | 0.5991385 |
| cmoB | gi 49175990 ref NC_000913.2 | + | 1951466 | 1952437 | 479.1794357 | 440.6706482 | 424.2156109 | 376.8342536 | 397.1158457 | 0.219996126  | 0.46226515  | 0.1939831 |
| torZ | gi 49175990 ref NC_000913.2 | - | 1952602 | 1955031 | 117.5923335 | 134.9220983 | 193.5703766 | 181.6990145 | 188.4553584 | -0.588523144 | 1.765557245 | 1.0301247 |
| torY | gi 49175990 ref NC_000913.2 | - | 1955056 | 1956156 | 37.26956285 | 50.41919341 | 56.04778799 | 69.3213511  | 57.30301864 | -0.510998749 | 1.056006916 | 0.5279327 |
| cutC | gi 49175990 ref NC_000913.2 | - | 1956544 | 1957290 | 4469.316127 | 5412.117301 | 3175.779287 | 7160.914289 | 5115.133943 | -0.117666282 | 0.076111232 | 0.0184999 |
| yecM | gi 49175990 ref NC_000913.2 | - | 1957304 | 1957870 | 254.2124162 | 258.3515018 | 225.6880522 | 220.960232  | 245.5389295 | 0.14790457   | 0.300467398 | 0.11561   |
| argS | gi 49175990 ref NC_000913.2 | + | 1958086 | 1959819 | 1355.546127 | 1286.0159   | 928.8431897 | 905.9896028 | 1002.702142 | 0.487877226  | 1.63704764  | 0.9307657 |
| yecT | gi 49175990 ref NC_000913.2 | + | 1959996 | 1960484 | 160.2386648 | 199.5472857 | 129.9190351 | 131.6163427 | 254.7850495 | 0.01715124   | 0.089037176 | 0.0234389 |
| flhE | gi 49175990 ref NC_000913.2 | - | 1960604 | 1960996 | 461.3553752 | 444.4908178 | 469.5028445 | 383.7722953 | 512.3629722 | 0.000415597  | 0.005788752 | 0         |
| flhA | gi 49175990 ref NC_000913.2 | - | 1960996 | 1963074 | 1876.244071 | 1721.013534 | 1598.48511  | 1309.839687 | 1707.031205 | 0.240858175  | 0.49296453  | 0.2089761 |
| flhB | gi 49175990 ref NC_000913.2 | - | 1963067 | 1964215 | 999.7105367 | 934.5789197 | 874.517741  | 711.2736048 | 1117.812836 | 0.109262879  | 0.182346761 | 0.0582503 |
| cheZ | gi 49175990 ref NC_000913.2 | - | 1964417 | 1965061 | 606.6256497 | 561.2989373 | 1680.778098 | 1680.962401 | 745.6103638 | -0.956339779 | 3.479178302 | 2.4170386 |
| cheY | gi 49175990 ref NC_000913.2 | - | 1965072 | 1965461 | 601.1421208 | 525.1802969 | 2052.533874 | 1099.064758 | 726.6836562 | -1.1337921   | 3.936913169 | 2.7970192 |
| cheB | gi 49175990 ref NC_000913.2 | - | 1965476 | 1966525 | 478.9699655 | 388.3760584 | 1521.137587 | 927.3827015 | 587.5478364 | -1.154396293 | 4.46460226  | 3.2663076 |
| cheR | gi 49175990 ref NC_000913.2 | - | 1966528 | 1967388 | 551.2511305 | 487.1932856 | 1459.117138 | 1129.067051 | 899.0164999 | -1.125475819 | 5.624158454 | 4.283757  |

|      |                             |   |         |         |             |             |             |             |             |              |             |           |
|------|-----------------------------|---|---------|---------|-------------|-------------|-------------|-------------|-------------|--------------|-------------|-----------|
| tap  | gi 49175990 ref NC_000913.2 | - | 1967407 | 1969008 | 2171.672389 | 1927.106973 | 5504.959062 | 4861.255301 | 3994.883076 | -1.195046789 | 6.452453867 | 5.0068923 |
| tar  | gi 49175990 ref NC_000913.2 | - | 1969054 | 1970715 | 2895.199586 | 2742.076141 | 6634.283069 | 6505.807194 | 4841.851668 | -1.07231032  | 5.094090147 | 3.8125553 |
| cheW | gi 49175990 ref NC_000913.2 | - | 1970860 | 1971363 | 812.7265129 | 806.382281  | 1600.798207 | 1331.015072 | 1462.754494 | -0.847105371 | 3.913545012 | 2.7836375 |
| cheA | gi 49175990 ref NC_000913.2 | - | 1971384 | 1973348 | 3034.038459 | 2858.90052  | 5855.573286 | 5139.426023 | 5045.701429 | -0.843663026 | 3.647132366 | 2.5648482 |
| motB | gi 49175990 ref NC_000913.2 | - | 1973353 | 1974279 | 1920.263137 | 1837.860516 | 3435.61127  | 3218.746956 | 2728.359824 | -0.721001929 | 2.729464563 | 1.7980685 |
| motA | gi 49175990 ref NC_000913.2 | - | 1974276 | 1975163 | 2499.223197 | 2603.449575 | 4156.235524 | 3962.097656 | 3586.381166 | -0.613585568 | 2.172290696 | 1.3287891 |
| flhC | gi 49175990 ref NC_000913.2 | - | 1975290 | 1975868 | 442.3573659 | 527.2223411 | 770.4627033 | 890.2601422 | 1084.294652 | -0.953022341 | 4.218951296 | 3.0444026 |
| flhD | gi 49175990 ref NC_000913.2 | - | 1975871 | 1976221 | 220.1597467 | 222.2556937 | 262.6606807 | 318.5639362 | 446.9094895 | -0.649802421 | 1.932304758 | 1.1491129 |
| insB | gi 49175990 ref NC_000913.2 | - | 1976542 | 1977045 | 137.7775922 | 157.7184069 | 127.3764927 | 121.1744709 | 132.298139  | 0.201631042  | 0.478934522 | 0.2015743 |
| insA | gi 49175990 ref NC_000913.2 | - | 1976964 | 1977239 | 118.462984  | 156.8258487 | 110.9903437 | 143.4076495 | 151.2261647 | -0.02302969  | 0.030462145 | 0.0022473 |
| uspC | gi 49175990 ref NC_000913.2 | + | 1977777 | 1978205 | 245.1314662 | 269.7838391 | 297.247487  | 316.0534229 | 283.9140165 | -0.229436516 | 0.468526599 | 0.1963434 |
| otsA | gi 49175990 ref NC_000913.2 | - | 1978212 | 1979636 | 1851.864754 | 1902.481701 | 1357.42094  | 1674.520139 | 1145.696531 | 0.424943824  | 1.196775052 | 0.6184937 |
| otsB | gi 49175990 ref NC_000913.2 | - | 1979611 | 1980411 | 1517.11218  | 1427.533901 | 1478.19775  | 1489.570837 | 798.3374452 | 0.252379799  | 0.443749786 | 0.1821402 |
| araH | gi 49175990 ref NC_000913.2 | - | 1980578 | 1981564 | 113.1923365 | 129.2207987 | 157.3429888 | 161.1912949 | 105.8940033 | -0.231850251 | 0.423511533 | 0.1736222 |
| araG | gi 49175990 ref NC_000913.2 | - | 1981579 | 1983093 | 177.211262  | 181.4193877 | 218.3264259 | 252.2676184 | 285.7746493 | -0.5040676   | 1.423907621 | 0.7750308 |
| araF | gi 49175990 ref NC_000913.2 | - | 1983163 | 1984152 | 44.95973813 | 56.09930627 | 82.84740322 | 74.81934523 | 54.17552409 | -0.481236219 | 1.037879607 | 0.5202286 |
| ftnB | gi 49175990 ref NC_000913.2 | + | 1984949 | 1985452 | 165.9609676 | 203.3400742 | 324.7720621 | 460.4556823 | 408.2658055 | -1.147673033 | 5.221346463 | 3.9294954 |
| yecJ | gi 49175990 ref NC_000913.2 | - | 1985531 | 1985782 | 377.507189  | 431.2708294 | 285.255652  | 336.569225  | 502.9028693 | 0.072856187  | 0.184399621 | 0.0593542 |
| azuC | gi 49175990 ref NC_000913.2 | - | 1985897 | 1985983 | 1014.11606  | 681.7832995 | 422.338676  | 1435.220014 | 1202.092102 | -0.256307849 | 0.365752083 | 0.1448265 |
| yecR | gi 49175990 ref NC_000913.2 | + | 1986246 | 1986569 | 841.611545  | 870.0390043 | 1128.15629  | 925.4686074 | 1577.561841 | -0.509916668 | 1.386454184 | 0.7197176 |
| ftnA | gi 49175990 ref NC_000913.2 | + | 1986740 | 1987237 | 806.5852247 | 916.6248245 | 1980.506558 | 2476.517407 | 2666.079687 | -1.493441808 | 8.330008964 | 6.6885775 |
| yecH | gi 49175990 ref NC_000913.2 | - | 1987275 | 1987514 | 1256.859584 | 1539.738831 | 2790.882892 | 2131.683786 | 2761.534203 | -0.895476519 | 3.425101102 | 2.3702811 |
| tyrP | gi 49175990 ref NC_000913.2 | + | 1987705 | 1988916 | 341.4183321 | 333.3691389 | 335.6401478 | 299.5624766 | 363.255267  | 0.023770403  | 0.032198487 | 0.0030156 |
| yecA | gi 49175990 ref NC_000913.2 | - | 1988978 | 1989643 | 607.1406871 | 581.2605187 | 961.6998503 | 768.0088352 | 590.5513265 | -0.355360875 | 0.971758038 | 0.4737779 |
| pgsA | gi 49175990 ref NC_000913.2 | - | 1990293 | 1990841 | 780.7077055 | 738.9237178 | 969.0738105 | 995.73076   | 1226.828535 | -0.484548746 | 1.476079722 | 0.8081734 |
| uvrC | gi 49175990 ref NC_000913.2 | - | 1990898 | 1992730 | 1651.222092 | 1688.771872 | 1615.553158 | 1404.96686  | 1519.949784 | 0.14399405   | 0.283487617 | 0.1073228 |
| uvrY | gi 49175990 ref NC_000913.2 | - | 1992727 | 1993383 | 1127.365124 | 1195.836922 | 1236.364465 | 1147.047132 | 1227.141872 | -0.057438958 | 0.085718869 | 0.0221491 |
| yecF | gi 49175990 ref NC_000913.2 | + | 1993842 | 1994066 | 928.5159565 | 1009.685515 | 378.2382755 | 440.8991931 | 701.3273554 | 0.903998832  | 3.935614941 | 2.7970192 |
| sdiA | gi 49175990 ref NC_000913.2 | - | 1994134 | 1994856 | 1000.678017 | 1018.202201 | 668.0556295 | 734.422855  | 864.5353835 | 0.406419489  | 1.298074164 | 0.6927928 |
| yecC | gi 49175990 ref NC_000913.2 | - | 1995086 | 1995838 | 434.6270066 | 448.3210111 | 497.8297598 | 492.319763  | 578.5863747 | -0.252030974 | 0.578328892 | 0.2535215 |
| yecS | gi 49175990 ref NC_000913.2 | - | 1995835 | 1996503 | 276.8207557 | 238.3351046 | 280.8199126 | 263.4421601 | 232.4147412 | 0.019182744  | 0.005903766 | 0         |
| dcyD | gi 49175990 ref NC_000913.2 | - | 1996518 | 1997504 | 506.591469  | 517.6530856 | 542.0152495 | 493.2961325 | 433.2460845 | 0.07027238   | 0.119585736 | 0.034732  |
| fliY | gi 49175990 ref NC_000913.2 | - | 1997609 | 1998409 | 863.1037032 | 882.3813084 | 1179.389322 | 1043.602159 | 665.8580439 | -0.127684722 | 0.241900687 | 0.0874402 |
| fliZ | gi 49175990 ref NC_000913.2 | - | 1998497 | 1999048 | 971.0084481 | 991.6091859 | 886.8092885 | 980.9918464 | 1049.770012 | 0.003265589  | 0.023843918 | 0.0005477 |
| fliA | gi 49175990 ref NC_000913.2 | - | 1999094 | 1999813 | 3114.85111  | 3464.01109  | 3359.779984 | 3439.812179 | 4140.005888 | -0.170202502 | 0.285675958 | 1.086502  |
| fliC | gi 49175990 ref NC_000913.2 | - | 2000134 | 2001630 | 14775.67927 | 14094.22923 | 27918.30343 | 28583.54127 | 27719.2103  | -0.953240256 | 4.161617511 | 3.0004094 |
| fliD | gi 49175990 ref NC_000913.2 | + | 2001896 | 2003302 | 1805.366908 | 1754.284334 | 3439.359956 | 4223.035883 | 3489.867207 | -1.064232818 | 5.345160188 | 4.0384418 |
| fliS | gi 49175990 ref NC_000913.2 | + | 2003327 | 2003737 | 504.6491231 | 523.3587714 | 852.0866528 | 931.59351   | 907.4667086 | -0.812177427 | 3.737173763 | 2.6364619 |
| fliT | gi 49175990 ref NC_000913.2 | + | 2003737 | 2004102 | 384.125732  | 398.9337364 | 739.6060827 | 859.8219122 | 864.7469245 | -1.08154226  | 5.782810236 | 4.4109419 |
| amyA | gi 49175990 ref NC_000913.2 | + | 2004180 | 2005667 | 886.5768489 | 873.815774  | 998.22736   | 1241.910819 | 1026.526922 | -0.311249828 | 0.766015657 | 0.3481108 |
| yedD | gi 49175990 ref NC_000913.2 | - | 2005701 | 2006114 | 643.7334518 | 617.3540913 | 585.0953037 | 591.9419275 | 573.2548597 | 0.118208667  | 0.221617497 | 0.0773895 |
| yedE | gi 49175990 ref NC_000913.2 | + | 2006301 | 2007506 | 888.7944948 | 797.7874234 | 1176.874413 | 517.648511  | 816.686325  | 0.05741628   | 0.017090866 | 0         |
| yedF | gi 49175990 ref NC_000913.2 | + | 2007503 | 2007736 | 352.2848825 | 329.5510458 | 503.9240743 | 216.1518332 | 476.3134491 | -0.197093606 | 0.368776676 | 0.1454051 |
| yedK | gi 49175990 ref NC_000913.2 | + | 2007845 | 2008513 | 40.56447918 | 36.05889573 | 43.33972182 | 31.57873713 | 38.13261012 | 0.046428377  | 0.023027115 | 0.0005477 |
| yedL | gi 49175990 ref NC_000913.2 | + | 2008624 | 2009103 | 36.7662312  | 46.60024526 | 34.8366668  | 37.06281598 | 44.70242465 | 0.069339791  | 0.105644569 | 0.0283572 |
| fliE | gi 49175990 ref NC_000913.2 | - | 2010724 | 2011038 | 539.6407884 | 513.821541  | 358.8485507 | 198.062725  | 399.9123682 | 0.739831605  | 2.365412192 | 1.4942783 |
| fliF | gi 49175990 ref NC_000913.2 | + | 2011253 | 2012911 | 3795.484989 | 3753.646421 | 2887.34392  | 2314.597916 | 4001.611879 | 0.296174409  | 0.667436147 | 0.2990682 |
| fliG | gi 49175990 ref NC_000913.2 | + | 2012904 | 2013899 | 2391.61324  | 2294.721084 | 1902.446648 | 1520.700848 | 2192.591239 | 0.331216859  | 0.767604829 | 0.3491173 |
| fliH | gi 49175990 ref NC_000913.2 | + | 2013892 | 2014578 | 1875.551328 | 1750.465893 | 1720.854529 | 1458.980573 | 2038.912527 | 0.068768437  | 0.100125342 | 0.0264593 |
| fliI | gi 49175990 ref NC_000913.2 | + | 2014578 | 2015951 | 135.7600941 | 1473.193084 | 1435.538731 | 1189.924304 | 1678.842586 | -0.031265233 | 0.026089264 | 0.000968  |
| fliJ | gi 49175990 ref NC_000913.2 | + | 2015970 | 2016413 | 460.3868377 | 491.0780054 | 491.4590566 | 477.8730147 | 656.8635294 | -0.204280683 | 0.38679288  | 0.1543669 |
| fliK | gi 49175990 ref NC_000913.2 | + | 2016410 | 2017537 | 1000.156963 | 985.8935942 | 1072.033106 | 855.8888664 | 1295.127709 | -0.111580782 | 0.199731273 | 0.0660742 |
| fliL | gi 49175990 ref NC_000913.2 | + | 2017642 | 2018106 | 2905.301672 | 3284.504713 | 2972.105571 | 2171.193496 | 4094.651148 | -0.013165769 | 0.014043766 | 0         |
| fliM | gi 49175990 ref NC_000913.2 | + | 2018111 | 2019115 | 1923.641627 | 1995.543542 | 2204.251603 | 1575.656221 | 2103.090662 | 0.047047603  | 0.057919514 | 0.0110921 |
| fliN | gi 49175990 ref NC_000913.2 | + | 2019112 | 2019525 | 1433.228408 | 1333.497272 | 1650.043463 | 1279.618688 | 1704.802044 | -0.143592281 | 0.300167109 | 0.11561   |
| fliO | gi 49175990 ref NC_000913.2 | + | 2019528 | 2019893 | 1234.272628 | 1211.9469   | 1241.62173  | 931.049701  | 1425.288447 | 0.033754136  | 0.04823619  | 0.0079297 |
| fliP | gi 49175990 ref NC_000913.2 | + | 2019893 | 2020630 | 1048.111949 | 1242.431263 | 989.8577756 | 812.1399526 | 1214.358597 | 0.162231199  | 0.387085841 | 0.1543669 |



|             |                             |   |         |         |             |              |             |             |             |              |             |             |          |
|-------------|-----------------------------|---|---------|---------|-------------|--------------|-------------|-------------|-------------|--------------|-------------|-------------|----------|
| <b>fliQ</b> | gi 49175990 ref NC_000913.2 | + | 2020640 | 2020909 | 578.9211027 | 634.512742   | 517.6301846 | 436.5230138 | 647.8863373 | 0.168919793  | 0.394126593 | 0.1571967   |          |
| <b>fliR</b> | gi 49175990 ref NC_000913.2 | + | 2020917 | 2021702 | 537.6880394 | 629.7947652  | 443.8609507 | 379.4783074 | 694.622466  | 0.174609019  | 0.393561748 | 0.1569272   |          |
| <b>rcsA</b> | gi 49175990 ref NC_000913.2 | + | 2021992 | 2022615 | 117.1934732 | 123.4911147  | 69.61497343 | 92.84175956 | 81.89048357 | 0.546781288  | 1.75315382  | 1.0202756   |          |
| <b>dsrB</b> | gi 49175990 ref NC_000913.2 | - | 2022659 | 2022847 | 823.7316352 | 754.1052571  | 935.4505706 | 1035.735572 | 874.017282  | 0.1254128396 | 0.636445424 | 0.284622    |          |
| <b>yodD</b> | gi 49175990 ref NC_000913.2 | + | 2023010 | 2023237 | 315.9286697 | 320.2320561  | 333.4035533 | 310.2305611 | 352.7685296 | 228.1852204  | 0.242058556 | 0.232654962 | 0.082297 |
| <b>yedP</b> | gi 49175990 ref NC_000913.2 | + | 2023535 | 2024350 | 336.8221355 | 347.6409251  | 339.5946464 | 404.2947024 | 261.8191    | 0.026431146  | 0.048942271 | 0.0081378   |          |
| <b>yedQ</b> | gi 49175990 ref NC_000913.2 | - | 2024347 | 2026041 | 628.6092892 | 599.3049887  | 637.9745823 | 643.4501065 | 568.8998851 | 0.002795899  | 0.005619045 | 0           |          |
| <b>yodC</b> | gi 49175990 ref NC_000913.2 | - | 2026212 | 2026394 | 46.97819079 | 39.84417471  | 167.4426014 | 67.72167391 | 50.06485664 | -1.060579574 | 2.518017756 | 1.6199106   |          |
| <b>yedI</b> | gi 49175990 ref NC_000913.2 | - | 2026473 | 2027390 | 354.7288863 | 280.0889716  | 663.5840462 | 474.2568533 | 287.9636041 | -0.520219697 | 1.440486592 | 0.7838485   |          |
| <b>yedA</b> | gi 49175990 ref NC_000913.2 | + | 2027563 | 2028483 | 219.4025588 | 230.8215506  | 200.8506494 | 208.6567038 | 254.337647  | 0.011434557  | 0.03632756  | 0.0036811   |          |
| <b>vsr</b>  | gi 49175990 ref NC_000913.2 | - | 2028472 | 2028942 | 173.7810808 | 157.6255285  | 174.4823841 | 132.5610808 | 155.910052  | 0.124909636  | 0.176842588 | 0.0559818   |          |
| <b>dcm</b>  | gi 49175990 ref NC_000913.2 | - | 2028923 | 2030341 | 640.802407  | 575.532519   | 514.6872836 | 472.1541142 | 529.363381  | 0.283540893  | 0.667871334 | 0.2992543   |          |
| <b>yedJ</b> | gi 49175990 ref NC_000913.2 | - | 2030408 | 2031103 | 204.9037025 | 214.6727781  | 227.6774744 | 206.304281  | 186.4095246 | 0.0221968812 | 0.034883741 | 0.0036811   |          |
| <b>yedR</b> | gi 49175990 ref NC_000913.2 | - | 2031143 | 2031508 | 89.72089401 | 84.5082273   | 50.15643349 | 59.06570117 | 29.59589488 | 0.923931981  | 3.03099823  | 2.035981    |          |
| <b>hchA</b> | gi 49175990 ref NC_000913.2 | + | 2033859 | 2034710 | 833.2898104 | 891.9011542  | 404.4589344 | 521.1430742 | 482.33635   | 0.834477372  | 4.162690125 | 3.0004094   |          |
| <b>yedV</b> | gi 49175990 ref NC_000913.2 | - | 2034818 | 2036176 | 184.400151  | 214.7171979  | 105.4757882 | 126.0131255 | 221.669629  | 0.090077512  | 0.213968895 | 0.073582    |          |
| <b>yedW</b> | gi 49175990 ref NC_000913.2 | - | 2036176 | 2036847 | 273.4816519 | 304.9332061  | 210.1095761 | 226.5122684 | 253.3145399 | 0.309436016  | 0.845767668 | 0.3966027   |          |
| <b>hiuH</b> | gi 49175990 ref NC_000913.2 | + | 2036980 | 2037393 | 68.95364374 | 82.69076126  | 62.89779655 | 124.2766868 | 149.721897  | -0.618196671 | 1.217833344 | 0.6336343   |          |
| <b>yedY</b> | gi 49175990 ref NC_000913.2 | + | 2037502 | 2038506 | 365.5463821 | 340.9479331  | 434.5727331 | 477.6959311 | 573.9817998 | -0.487388648 | 1.49779402  | 0.8238904   |          |
| <b>yedZ</b> | gi 49175990 ref NC_000913.2 | + | 2038507 | 2039142 | 129.8031332 | 172.0253059  | 161.000554  | 163.8316791 | 203.856414  | -0.266522419 | 0.429926345 | 0.1762871   |          |
| <b>zinT</b> | gi 49175990 ref NC_000913.2 | + | 2039399 | 2040049 | 20.84719547 | 19.93357614  | 9.127340923 | 30.02498277 | 30.03916038 | -0.207116279 | 0.137124776 | 0.0413595   |          |
| <b>yodB</b> | gi 49175990 ref NC_000913.2 | + | 2040392 | 2040922 | 41.77623677 | 53.25440264  | 16.16335955 | 44.71472759 | 57.78200106 | 0.199547033  | 0.322461113 | 0.1253431   |          |
| <b>mtfA</b> | gi 49175990 ref NC_000913.2 | + | 2041675 | 2042472 | 732.8444239 | 812.1332935  | 1716.050055 | 1994.39896  | 1964.076844 | -1.313634238 | 7.592339789 | 6.0198519   |          |
| <b>yeeJ</b> | gi 49175990 ref NC_000913.2 | + | 2042962 | 2050038 | 588.326682  | 656.33668104 | 580.3977556 | 630.3127221 | 695.3104416 | -0.075424632 | 0.085833324 | 0.0221491   |          |
| <b>shiA</b> | gi 49175990 ref NC_000913.2 | + | 2051667 | 2052983 | 599.4758808 | 589.8213806  | 575.8748918 | 589.6977788 | 576.5972383 | 0.035917296  | 0.060303901 | 0.0118829   |          |
| <b>amn</b>  | gi 49175990 ref NC_000913.2 | + | 2053085 | 2054539 | 1458.365326 | 1397.148453  | 1450.126092 | 1474.272709 | 1419.049499 | -0.013832066 | 0.028606218 | 0.0017411   |          |
| <b>yeeN</b> | gi 49175990 ref NC_000913.2 | + | 2054882 | 2055598 | 516.5101829 | 556.6200114  | 281.1088282 | 736.8083254 | 565.2085783 | -0.0217299   | 0.034574198 | 0.0035281   |          |
| <b>yeeO</b> | gi 49175990 ref NC_000913.2 | - | 2056227 | 2057714 | 81.54774745 | 97.89129916  | 110.2635356 | 78.63878619 | 72.06700028 | 0.039934069  | 0.065234958 | 0.015023    |          |
| <b>cbI</b>  | gi 49175990 ref NC_000913.2 | - | 2057988 | 2058938 | 809.3421095 | 858.6535117  | 422.1988572 | 530.5324567 | 817.9732658 | 0.468793885  | 1.374023522 | 0.7445406   |          |
| <b>nac</b>  | gi 49175990 ref NC_000913.2 | - | 2059040 | 2059957 | 64.25399291 | 66.49337701  | 70.89820696 | 80.75634108 | 93.99740941 | -0.336672987 | 0.688065665 | 0.3088556   |          |
| <b>orfK</b> | gi 49175990 ref NC_000913.2 | - | 2060415 | 2061347 | 750.2875468 | 889.1001776  | 890.096867  | 950.5198193 | 760.8179843 | -0.103404772 | 0.143487262 | 0.0429098   |          |
| <b>cobT</b> | gi 49175990 ref NC_000913.2 | - | 2061412 | 2062491 | 216.0008379 | 200.3748436  | 321.4837028 | 248.7381189 | 120.8910315 | -0.107231493 | 0.198172582 | 0.0652279   |          |
| <b>cobS</b> | gi 49175990 ref NC_000913.2 | - | 2062503 | 2063246 | 75.45724788 | 63.57862059  | 203.9944164 | 124.5212211 | 60.30331261 | -0.837922147 | 2.020934804 | 1.2137941   |          |
| <b>cobU</b> | gi 49175990 ref NC_000913.2 | - | 2063243 | 2063788 | 125.7140429 | 148.2312311  | 258.2744832 | 176.2130232 | 150.7478077 | -0.507761606 | 1.260931068 | 0.6627124   |          |
| <b>insH</b> | gi 49175990 ref NC_000913.2 | - | 2064329 | 2065345 | 722.855831  | 776.0253472  | 759.3472276 | 876.5839177 | 819.9942561 | -0.142992997 | 0.25329588  | 0.0923968   |          |
| <b>insD</b> | gi 49175990 ref NC_000913.2 | - | 2066976 | 2067881 | 1303.062666 | 1275.582822  | 1191.074827 | 1087.600237 | 1103.844281 | 0.200911772  | 0.442920594 | 0.1817004   |          |
| <b>insC</b> | gi 49175990 ref NC_000913.2 | - | 2067839 | 2068204 | 786.6997224 | 816.8515748  | 862.1905653 | 767.0510556 | 872.613264  | -0.059435938 | 0.097935866 | 0.0262976   |          |
| <b>flu</b>  | gi 49175990 ref NC_000913.2 | + | 2069563 | 2072682 | 627.4677702 | 577.4432056  | 604.7620534 | 6996.161513 | 502.8380439 | -2.212701406 | 2.862405981 | 1.9037696   |          |
| <b>yeeR</b> | gi 49175990 ref NC_000913.2 | + | 2072803 | 2074335 | 100.9109002 | 101.6281156  | 76.91667552 | 382.2755886 | 97.31054937 | -0.916521095 | 1.321197316 | 0.7104134   |          |
| <b>yeeS</b> | gi 49175990 ref NC_000913.2 | + | 2074332 | 2074778 | 45.61312045 | 40.80794577  | 47.4571879  | 118.656451  | 28.75986714 | -0.5931603   | 0.809211261 | 0.3724304   |          |
| <b>yeeT</b> | gi 49175990 ref NC_000913.2 | + | 2074841 | 2075062 | 12.53600794 | 13.30058662  | 22.23445368 | 20.14389342 | 14.75371061 | -0.550098862 | 0.806957798 | 0.371975    |          |
| <b>yeeU</b> | gi 49175990 ref NC_000913.2 | + | 2075136 | 2075504 | 28.96991269 | 29.44330231  | 30.55886751 | 23.77507791 | 37.90172537 | -0.074399155 | 0.067712578 | 0.0160372   |          |
| <b>cbtA</b> | gi 49175990 ref NC_000913.2 | + | 2075593 | 2075967 | 134.6562585 | 191.051309   | 102.1538688 | 116.9218243 | 205.5269832 | 0.136533884  | 0.322992292 | 0.1255384   |          |
| <b>yeeX</b> | gi 49175990 ref NC_000913.2 | - | 2077056 | 2077385 | 2617.198903 | 2743.074891  | 2668.194778 | 3890.130744 | 3999.786565 | -0.418534815 | 0.99782187  | 0.4910267   |          |
| <b>yeeA</b> | gi 49175990 ref NC_000913.2 | - | 2077557 | 2078615 | 418.9475733 | 419.8134935  | 465.8007856 | 504.3808847 | 449.9330258 | -0.176070778 | 0.370088426 | 0.1454249   |          |
| <b>sbmC</b> | gi 49175990 ref NC_000913.2 | - | 2078813 | 2079286 | 510.8392572 | 454.9033151  | 770.8423439 | 1008.310798 | 529.0078579 | -0.655739659 | 2.103631109 | 1.2797579   |          |
| <b>dacD</b> | gi 49175990 ref NC_000913.2 | - | 2079405 | 2080571 | 145.5433046 | 124.36114    | 174.1806819 | 134.6913328 | 130.3295297 | -0.083673001 | 0.184896354 | 0.0595043   |          |
| <b>sbCB</b> | gi 49175990 ref NC_000913.2 | + | 2080780 | 2082207 | 554.0078231 | 550.8839886  | 609.0930038 | 655.7482683 | 593.5002717 | -0.165524077 | 0.338460836 | 0.1335511   |          |
| <b>yeeD</b> | gi 49175990 ref NC_000913.2 | - | 2082250 | 2082477 | 104.6727934 | 106.380547   | 108.9526087 | 109.9176432 | 117.7059903 | -0.091818948 | 0.133772413 | 0.039995    |          |
| <b>yeeE</b> | gi 49175990 ref NC_000913.2 | - | 2082491 | 2083549 | 61.3754029  | 56.00687424  | 60.7017934  | 53.9118211  | 46.22051337 | 0.099926697  | 0.126551066 | 0.0373086   |          |
| <b>plaP</b> | gi 49175990 ref NC_000913.2 | - | 2083728 | 2085086 | 785.0868889 | 751.2763517  | 450.5440669 | 406.3205113 | 699.1678079 | 0.562926742  | 1.746605436 | 1.0163602   |          |
| <b>yoel</b> | gi 49175990 ref NC_000913.2 | - | 2085076 | 2085138 | 126.2692468 | 152.9914159  | 56.79908829 | 70.77896765 | 104.8791499 | 0.806436977  | 2.947083193 | 1.9705614   |          |
| <b>yeeY</b> | gi 49175990 ref NC_000913.2 | - | 2085353 | 2086282 | 294.248726  | 273.5099577  | 415.8271043 | 420.1183484 | 263.0649206 | -0.347685159 | 0.877313369 | 0.4166181   |          |
| <b>yeeZ</b> | gi 49175990 ref NC_000913.2 | - | 2086328 | 2087152 | 1671.378675 | 1726.76922   | 1941.532257 | 1771.348723 | 1447.404241 | -0.012415654 | 0.022816734 | 0.0005477   |          |
| <b>yoeB</b> | gi 49175990 ref NC_000913.2 | - | 2087235 | 2087489 | 106.1446259 | 126.3870234  | 84.24949906 | 100.8774944 | 110.8518971 | 0.204915535  | 0.477296675 | 0.2008702   |          |
| <b>yefM</b> | gi 49175990 ref NC_000913.2 | - | 2087486 | 2087737 | 244.6281264 | 258.3681005  | 152.5297979 | 207.3839226 | 249.691186  | 0.282272361  | 0.6926404   | 0.3103556   |          |
| <b>hisL</b> | gi 49175990 ref NC_000913.2 | + | 2088020 | 2088070 | 1032.536297 | 1154.070269  | 1807.822138 | 3250.994693 | 3493.666079 | -1.42680717  | 6.12127853  | 4.7127612   |          |

|      |                             |   |         |         |             |              |             |             |             |              |             |           |
|------|-----------------------------|---|---------|---------|-------------|--------------|-------------|-------------|-------------|--------------|-------------|-----------|
| hisG | gi 49175990 ref NC_000913.2 | + | 2088216 | 2089115 | 292.0014    | 248.7782815  | 407.6748098 | 339.7719581 | 299.8050293 | -0.334149712 | 0.937540532 | 0.4557021 |
| hisD | gi 49175990 ref NC_000913.2 | + | 2089121 | 2090425 | 403.8306963 | 331.3936931  | 574.6013962 | 437.4377392 | 422.0324273 | -0.336397522 | 0.981454086 | 0.4794277 |
| hisC | gi 49175990 ref NC_000913.2 | + | 2090422 | 2091492 | 272.131427  | 208.8449112  | 387.5080079 | 285.0000395 | 285.1499957 | -0.357261911 | 1.040518239 | 0.5204761 |
| hisB | gi 49175990 ref NC_000913.2 | + | 2091492 | 2092559 | 335.4428734 | 295.3318982  | 475.6506967 | 314.1774426 | 280.8782898 | -0.135969289 | 0.321741269 | 0.1253096 |
| hisH | gi 49175990 ref NC_000913.2 | + | 2092559 | 2093149 | 163.3630573 | 132.8897517  | 249.7319432 | 164.9169369 | 108.3653058 | -0.177515104 | 0.369438957 | 0.1454051 |
| hisA | gi 49175990 ref NC_000913.2 | + | 2093149 | 2093886 | 208.5134474 | 188.0159503  | 363.8700981 | 223.3949582 | 192.3316029 | -0.346870884 | 0.833844428 | 0.3894711 |
| hisF | gi 49175990 ref NC_000913.2 | + | 2093868 | 2094644 | 349.0718671 | 332.4082838  | 519.432198  | 348.908406  | 303.337237  | -0.165175198 | 0.364634415 | 0.1440332 |
| hisI | gi 49175990 ref NC_000913.2 | + | 2094638 | 2095249 | 415.17682   | 414.112533   | 503.4654953 | 414.9966772 | 429.7283043 | -0.10653466  | 0.216791934 | 0.0750873 |
| cid  | gi 49175990 ref NC_000913.2 | - | 2095345 | 2096325 | 3594.130579 | 3619.731783  | 2426.556868 | 3414.756589 | 3394.13329  | 0.211107952  | 0.500027048 | 0.2131584 |
| ugd  | gi 49175990 ref NC_000913.2 | - | 2096471 | 2097637 | 222.2977089 | 254.6037267  | 180.2102088 | 220.9344437 | 281.0749651 | 0.03505936   | 0.110876876 | 0.0303928 |
| gnd  | gi 49175990 ref NC_000913.2 | - | 2097886 | 2099292 | 7793.347214 | 8073.412846  | 5501.699476 | 4896.221279 | 5484.082782 | 0.581528406  | 2.009561859 | 1.2058274 |
| insH | gi 49175990 ref NC_000913.2 | - | 2099919 | 2100935 | 886.6949276 | 1015.4009149 | 891.9154905 | 997.6965182 | 940.0311379 | -0.011628149 | 0.021860314 | 0.0004107 |
| wbbK | gi 49175990 ref NC_000913.2 | - | 2101415 | 2102533 | 342.0635835 | 404.6916453  | 183.4466695 | 411.4456402 | 215.7860967 | 0.419186607  | 1.047927063 | 0.5225889 |
| wbbJ | gi 49175990 ref NC_000913.2 | - | 2102518 | 2103108 | 281.7578232 | 306.8224434  | 151.2451485 | 329.4391833 | 130.7905085 | 0.499070807  | 1.148272227 | 0.5879634 |
| wbbl | gi 49175990 ref NC_000913.2 | - | 2103089 | 2104081 | 649.5982844 | 710.496958   | 312.5402821 | 457.9556386 | 308.7826682 | 0.895917081  | 4.282199634 | 3.103649  |
| rfc  | gi 49175990 ref NC_000913.2 | - | 2104084 | 2105250 | 302.5044561 | 337.2272261  | 154.9884614 | 273.8737902 | 159.6522875 | 0.674931647  | 2.250535802 | 1.3942045 |
| gjf  | gi 49175990 ref NC_000913.2 | - | 2105250 | 2106353 | 357.9885608 | 332.3971809  | 207.0627238 | 392.67326   | 244.8147375 | 0.284821061  | 0.608573427 | 0.2691543 |
| rfbX | gi 49175990 ref NC_000913.2 | - | 2106361 | 2107608 | 597.3396857 | 631.6465581  | 392.4223369 | 512.2142288 | 528.1123669 | 0.342342793  | 0.994992134 | 0.4899061 |
| rfbC | gi 49175990 ref NC_000913.2 | - | 2107605 | 2108162 | 245.06592   | 275.4920445  | 130.6257704 | 264.12482   | 247.5984782 | 0.237405277  | 0.542095537 | 0.2332111 |
| rfbA | gi 49175990 ref NC_000913.2 | - | 2108162 | 2109043 | 662.623512  | 643.0044111  | 404.7019315 | 657.5866915 | 533.9491159 | 0.281185564  | 0.688652752 | 0.3091873 |
| rfbD | gi 49175990 ref NC_000913.2 | - | 2109101 | 2110000 | 718.614333  | 609.6998245  | 476.0125179 | 637.7115742 | 621.284869  | 0.209249898  | 0.4326022   | 0.1770091 |
| rfbB | gi 49175990 ref NC_000913.2 | - | 2110000 | 2111085 | 852.8579328 | 910.8964006  | 487.0631879 | 744.1381417 | 731.1137331 | 0.40226493   | 1.261577141 | 0.6674415 |
| galF | gi 49175990 ref NC_000913.2 | - | 2111458 | 2112351 | 3290.466681 | 3459.23449   | 2780.72037  | 2632.538857 | 2774.019813 | 0.300638584  | 0.802619517 | 0.3702416 |
| wcaM | gi 49175990 ref NC_000913.2 | - | 2112526 | 2113920 | 93.31210429 | 94.98317953  | 74.37214933 | 63.03636432 | 88.35086338 | 0.320375327  | 0.709943045 | 0.3177757 |
| wcaL | gi 49175990 ref NC_000913.2 | - | 2113931 | 2115151 | 64.02765282 | 73.17474433  | 51.73729448 | 59.22031352 | 42.84716275 | 0.404759108  | 0.939525233 | 0.4570396 |
| wcaK | gi 49175990 ref NC_000913.2 | - | 2115148 | 2116428 | 27.65057965 | 42.8467669   | 31.68362395 | 27.00408421 | 30.27441956 | 0.206382526  | 0.370859798 | 0.1454249 |
| wzxC | gi 49175990 ref NC_000913.2 | - | 2116704 | 2118182 | 36.84284518 | 31.30100719  | 43.49502875 | 39.25791662 | 36.00828069 | -0.191582653 | 0.296539067 | 0.1143219 |
| wcaJ | gi 49175990 ref NC_000913.2 | - | 2118184 | 2119578 | 22.39746818 | 27.58296039  | 23.74518848 | 21.34061281 | 21.35159422 | 0.158333138  | 0.174443065 | 0.0547989 |
| cpsG | gi 49175990 ref NC_000913.2 | - | 2119633 | 2121003 | 24.35086107 | 28.52342981  | 30.19170474 | 24.73636033 | 24.74923154 | -0.013538424 | 0           | 0         |
| cpsB | gi 49175990 ref NC_000913.2 | - | 2121108 | 2122544 | 19.08939507 | 16.1153475   | 21.2587346  | 20.23082315 | 22.40171586 | -0.255055009 | 0.317132574 | 0.1239013 |
| wcal | gi 49175990 ref NC_000913.2 | - | 2122547 | 2123770 | 12.60717335 | 12.34027344  | 17.39143372 | 16.89114423 | 21.21197307 | -0.562624677 | 0.807386301 | 0.371975  |
| gmm  | gi 49175990 ref NC_000913.2 | - | 2123767 | 2124246 | 10.50030495 | 13.32264372  | 14.87451136 | 10.35856309 | 26.5252949  | -0.55746243  | 0.640602971 | 0.2862934 |
| fcl  | gi 49175990 ref NC_000913.2 | - | 2124249 | 2125214 | 13.62310243 | 17.1265954   | 12.11175025 | 15.60654887 | 12.39255144 | 0.177239742  | 0.187453022 | 0.0607696 |
| gmd  | gi 49175990 ref NC_000913.2 | - | 2125217 | 2126338 | 24.35086107 | 28.52342981  | 24.02004873 | 24.69372279 | 26.87099117 | 0.052304251  | 0.051629356 | 0.0088785 |
| wcaE | gi 49175990 ref NC_000913.2 | - | 2126928 | 2127674 | 0.264312492 | 5.774953884  | 4.047635428 | 2.344027438 | 6.612956764 | -0.688307545 | 0.196150951 | 0.06437   |
| wcaD | gi 49175990 ref NC_000913.2 | - | 2127685 | 2128902 | 6.019621319 | 9.534957603  | 6.667220152 | 8.866621496 | 4.595130209 | 0.176053798  | 0.14274327  | 0.0427363 |
| wcaC | gi 49175990 ref NC_000913.2 | - | 2128877 | 2130094 | 16.99970835 | 17.0929588   | 10.68398158 | 11.21356165 | 11.21921057 | 0.624046079  | 0.863379771 | 0.4075849 |
| wcaB | gi 49175990 ref NC_000913.2 | - | 2130091 | 2130579 | 10.95250556 | 7.558359327  | 12.03486949 | 12.35412431 | 13.43392104 | -0.408544817 | 0.475143656 | 0.199683  |
| wcaA | gi 49175990 ref NC_000913.2 | - | 2130582 | 2131421 | 22.45126203 | 26.62491002  | 14.73282473 | 18.93203521 | 13.56108457 | 0.618967162  | 1.108266895 | 0.5628105 |
| wzc  | gi 49175990 ref NC_000913.2 | - | 2131514 | 2133676 | 31.13311903 | 26.5560152   | 28.33014871 | 39.0770589  | 33.66569604 | -0.21484116  | 0.321064017 | 0.1253096 |
| wza  | gi 49175990 ref NC_000913.2 | - | 2134128 | 2135267 | 8.301873463 | 6.625485256  | 8.183037664 | 14.35962    | 6.871106068 | -0.373761866 | 0.249373405 | 0.0909384 |
| yegH | gi 49175990 ref NC_000913.2 | + | 2135926 | 2137509 | 952.4165255 | 882.3351223  | 763.2015428 | 617.8845485 | 583.5502647 | 0.509770192  | 1.651206039 | 0.9422047 |
| asmA | gi 49175990 ref NC_000913.2 | - | 2137783 | 2139636 | 1371.841698 | 1343.01948   | 1418.416513 | 1439.571169 | 1482.884993 | -0.090581584 | 0.166297548 | 0.0525902 |
| dcd  | gi 49175990 ref NC_000913.2 | - | 2139658 | 2140239 | 1172.422261 | 1387.752005  | 1303.038225 | 1356.565838 | 1359.517703 | -0.09206441  | 0.11066125  | 0.0303055 |
| udk  | gi 49175990 ref NC_000913.2 | - | 2140331 | 2140972 | 377.7381276 | 401.7939826  | 298.9165245 | 286.1233661 | 376.5346948 | 0.268657039  | 0.692904061 | 0.3103556 |
| yegE | gi 49175990 ref NC_000913.2 | + | 2141290 | 2144607 | 1495.638349 | 1415.188989  | 1762.944588 | 1634.704313 | 1651.24619  | -0.197925132 | 0.446190831 | 0.1840474 |
| alkA | gi 49175990 ref NC_000913.2 | - | 2144716 | 2145564 | 126.9024362 | 96.77912772  | 160.9933671 | 136.7870254 | 112.4962195 | -0.243694269 | 0.609774005 | 0.2692728 |
| yegD | gi 49175990 ref NC_000913.2 | + | 2145698 | 2147050 | 222.7911538 | 266.971218   | 206.8792373 | 192.93832   | 207.4810386 | 0.251663953  | 0.642350452 | 0.286746  |
| yegI | gi 49175990 ref NC_000913.2 | - | 2147063 | 2149009 | 95.90633513 | 94.97337317  | 90.77660286 | 94.32998261 | 124.1648336 | -0.117548366 | 0.170408025 | 0.0536727 |
| yegJ | gi 49175990 ref NC_000913.2 | + | 2149209 | 2149670 | 6.329409299 | 5.686769701  | 7.243049486 | 15.1434457  | 16.66389811 | -1.088296648 | 1.550451105 | 0.8653327 |
| yegK | gi 49175990 ref NC_000913.2 | - | 2149735 | 2150496 | 12.53600794 | 13.30058662  | 22.70736321 | 19.23802529 | 30.06584426 | -0.894310568 | 1.661683181 | 0.9513929 |
| yegL | gi 49175990 ref NC_000913.2 | - | 2150493 | 2151152 | 20.85563745 | 46.73257574  | 41.06152702 | 35.99799306 | 42.55497778 | -0.321044511 | 0.319346383 | 0.1244053 |
| ibsA | gi 49175990 ref NC_000913.2 | - | 2151373 | 2151432 | 240.5603545 | 343.0356047  | 431.0726546 | 521.4363848 | 681.449469  | -0.964739994 | 3.453220794 | 2.3935347 |
| ibsB | gi 49175990 ref NC_000913.2 | - | 2151705 | 2151761 | 164.4996337 | 173.8337208  | 215.1953748 | 272.6729448 | 429.8609277 | -0.883280305 | 2.741789167 | 1.8030476 |
| mdtA | gi 49175990 ref NC_000913.2 | + | 2152040 | 2153287 | 181.9152909 | 169.0325313  | 148.9944064 | 185.8227843 | 148.2285315 | 0.128609017  | 0.218872428 | 0.0758256 |
| mdtB | gi 49175990 ref NC_000913.2 | + | 2153287 | 2156409 | 312.013496  | 342.9198381  | 302.9387591 | 363.0288717 | 316.4106166 | -0.018454588 | 0.00160817  | 0         |
| mdtC | gi 49175990 ref NC_000913.2 | + | 2156410 | 2159487 | 307.0060172 | 273.4917019  | 246.1049702 | 317.0040758 | 272.6366055 | 0.066438158  | 0.101606913 | 0.0267012 |

|             |                             |   |         |         |             |             |             |             |             |              |             |           |
|-------------|-----------------------------|---|---------|---------|-------------|-------------|-------------|-------------|-------------|--------------|-------------|-----------|
| <b>mdtD</b> | gi 49175990 ref NC_000913.2 | + | 2159488 | 2160903 | 132.8822094 | 114.868376  | 80.55409555 | 120.7817062 | 105.4037364 | 0.28100206   | 0.603543939 | 0.2674799 |
| <b>baeS</b> | gi 49175990 ref NC_000913.2 | + | 2160900 | 2162303 | 119.4004289 | 112.0498341 | 129.806672  | 134.389919  | 106.8122119 | -0.083879817 | 0.156466999 | 0.0487535 |
| <b>baeR</b> | gi 49175990 ref NC_000913.2 | + | 2162300 | 2163022 | 229.9068887 | 211.7693849 | 253.8029316 | 215.2774934 | 179.8133057 | 0.053706634  | 0.046745721 | 0.0074556 |
| <b>yegP</b> | gi 49175990 ref NC_000913.2 | + | 2163213 | 2163545 | 80.5912522  | 110.2880827 | 55.14569415 | 88.12661138 | 60.74285859 | 0.437139755  | 1.189914219 | 0.6164224 |
| <b>yegQ</b> | gi 49175990 ref NC_000913.2 | + | 2163692 | 2165053 | 75.662763   | 747.505098  | 607.3797898 | 562.8880184 | 568.7707417 | 0.356746803  | 1.039427462 | 0.5204761 |
| <b>ogrK</b> | gi 49175990 ref NC_000913.2 | - | 2165326 | 2165544 | 172.700789  | 147.1535291 | 91.5135213  | 86.40821934 | 93.06374734 | 0.845554946  | 3.486559288 | 2.4231875 |
| <b>yegR</b> | gi 49175990 ref NC_000913.2 | - | 2166013 | 2166330 | 7.102866515 | 4.7176594   | 8.257921475 | 19.72551831 | 3.637430106 | -0.801152162 | 0.848616112 | 0.3971622 |
| <b>yegS</b> | gi 49175990 ref NC_000913.2 | + | 2166736 | 2167635 | 415.1164276 | 421.7193171 | 289.6241515 | 284.9498015 | 356.4027502 | 0.424062194  | 1.307597048 | 0.6998487 |
| <b>insE</b> | gi 49175990 ref NC_000913.2 | + | 2168260 | 2168559 | 80.8582723  | 76.91361425 | 78.31094613 | 80.68747941 | 76.32995711 | 0.014693043  | 0.009843037 | 0         |
| <b>insF</b> | gi 49175990 ref NC_000913.2 | + | 2168556 | 2169422 | 142.4270428 | 150.0867087 | 306.653982  | 313.9395756 | 325.2462782 | -1.116203691 | 5.668590302 | 4.3183907 |
| <b>gatD</b> | gi 49175990 ref NC_000913.2 | - | 2169857 | 2170897 | 2283.621876 | 2247.242642 | 10887.32035 | 10722.26059 | 6240.94051  | -2.018987674 | 12.49185248 | 10.484145 |
| <b>gatC</b> | gi 49175990 ref NC_000913.2 | - | 2170945 | 2172300 | 5846.33833  | 5627.61186  | 22159.22367 | 22468.42807 | 12521.5612  | -1.713091126 | 9.152433544 | 7.4233327 |
| <b>gatB</b> | gi 49175990 ref NC_000913.2 | - | 2172304 | 2172588 | 2533.703067 | 2354.543942 | 6614.153559 | 6645.800178 | 4120.781683 | -1.223495005 | 5.80697686  | 4.4300586 |
| <b>gatA</b> | gi 49175990 ref NC_000913.2 | - | 2172619 | 2173071 | 2509.512493 | 2475.198552 | 6783.68664  | 9068.182671 | 4901.515007 | -1.472366935 | 7.29774071  | 5.7533858 |
| <b>gatZ</b> | gi 49175990 ref NC_000913.2 | - | 2173081 | 2174343 | 12990.11398 | 11823.20677 | 33054.02147 | 41680.15536 | 24535.16016 | -1.401818585 | 6.822558385 | 5.3265873 |
| <b>gatY</b> | gi 49175990 ref NC_000913.2 | - | 2174372 | 2175226 | 9306.6867   | 9124.827567 | 22662.06858 | 27147.04821 | 21313.19247 | -1.363775383 | 7.32771439  | 5.7784978 |
| <b>fabB</b> | gi 49175990 ref NC_000913.2 | - | 2175534 | 2176586 | 960.6686054 | 877.579555  | 1023.285845 | 1033.31716  | 599.7012207 | 0.078643289  | 0.08616475  | 0.0221491 |
| <b>yegT</b> | gi 49175990 ref NC_000913.2 | + | 2176843 | 2178120 | 76.21696171 | 60.71228912 | 82.36214602 | 77.48939235 | 91.83838667 | -0.266833745 | 0.609343358 | 0.2691753 |
| <b>yegU</b> | gi 49175990 ref NC_000913.2 | + | 2178117 | 2179121 | 76.48974896 | 71.20805682 | 101.8922476 | 96.41466797 | 88.7456478  | -0.359762889 | 0.887323926 | 0.4234833 |
| <b>yegV</b> | gi 49175990 ref NC_000913.2 | + | 2179118 | 2180083 | 103.5776815 | 98.75892707 | 124.3900624 | 108.865302  | 114.4479186 | -0.184526418 | 0.374832875 | 0.1474503 |
| <b>yegW</b> | gi 49175990 ref NC_000913.2 | - | 2180057 | 2180803 | 167.3952084 | 155.7360829 | 200.6596183 | 167.0682493 | 136.0884184 | -0.032269854 | 0.07774391  | 0.0190529 |
| <b>yegX</b> | gi 49175990 ref NC_000913.2 | - | 2180855 | 2181673 | 107.8601709 | 108.2756516 | 123.9632332 | 153.4289139 | 142.4388856 | -0.380686438 | 0.94386777  | 0.4587835 |
| <b>thiD</b> | gi 49175990 ref NC_000913.2 | - | 2181738 | 2182538 | 131.6628069 | 112.013315  | 165.4968699 | 155.8292747 | 141.5013487 | -0.314404786 | 0.793232816 | 0.3645902 |
| <b>thiM</b> | gi 49175990 ref NC_000913.2 | - | 2182535 | 2183323 | 187.018302  | 210.9043638 | 170.1602668 | 157.2202398 | 216.1196438 | 0.114885605  | 0.23910339  | 0.0858143 |
| <b>rcnR</b> | gi 49175990 ref NC_000913.2 | - | 2183546 | 2183818 | 122.8359055 | 131.0947708 | 141.2589593 | 186.9259972 | 153.769815  | -0.35588384  | 0.78480529  | 0.360433  |
| <b>rcnA</b> | gi 49175990 ref NC_000913.2 | + | 2183939 | 2184763 | 44.92356669 | 57.05462393 | 53.28803805 | 62.63587549 | 52.8157561  | -0.171189052 | 0.18835344  | 0.0610389 |
| <b>rcnB</b> | gi 49175990 ref NC_000913.2 | + | 2184982 | 2185320 | 578.6120542 | 696.2947378 | 399.7292812 | 391.4636438 | 487.6454091 | 0.549518371  | 2.108108933 | 1.2830803 |
| <b>yehA</b> | gi 49175990 ref NC_000913.2 | - | 2185402 | 2186436 | 11.11105339 | 14.27558537 | 12.48164161 | 14.70135542 | 25.47103168 | -0.50022159  | 0.517240674 | 0.2218965 |
| <b>yehB</b> | gi 49175990 ref NC_000913.2 | - | 2186452 | 2188932 | 40.15483044 | 44.66541239 | 55.98520024 | 68.19725964 | 55.08521434 | -0.508551423 | 1.141470966 | 0.5834805 |
| <b>yehC</b> | gi 49175990 ref NC_000913.2 | - | 2188948 | 2189667 | 6.629690701 | 10.48804508 | 5.63828741  | 12.14272808 | 6.808465226 | 0.010963245  | 0           | 0         |
| <b>yehD</b> | gi 49175990 ref NC_000913.2 | - | 2189702 | 2190244 | 75.0591022  | 75.03066256 | 182.7203589 | 260.886033  | 224.3434988 | -1.580249538 | 8.694015849 | 7.0135204 |
| <b>yehE</b> | gi 49175990 ref NC_000913.2 | - | 2190537 | 2190818 | 111.5922386 | 144.4678173 | 92.55284416 | 124.3677929 | 137.6877717 | 0.067071748  | 0.185763884 | 0.0597732 |
| <b>mrp</b>  | gi 49175990 ref NC_000913.2 | - | 2191081 | 2192190 | 2252.498006 | 2348.900509 | 3205.626138 | 2604.543547 | 2414.255181 | -0.245671693 | 0.544251112 | 0.2340619 |
| <b>metG</b> | gi 49175990 ref NC_000913.2 | + | 2192322 | 2194355 | 2185.699053 | 2223.513359 | 1737.952826 | 1570.924899 | 1837.243708 | 0.360570914  | 0.952622117 | 0.4645752 |
| <b>yehI</b> | gi 49175990 ref NC_000913.2 | + | 2198301 | 2201933 | 162.3655601 | 150.0347221 | 155.3484469 | 153.6620805 | 165.9351054 | -0.010101444 | 0.023151119 | 0.0005477 |
| <b>yehL</b> | gi 49175990 ref NC_000913.2 | + | 2202618 | 2203706 | 13.68757094 | 16.1667538  | 12.32364603 | 16.78236067 | 17.86555361 | -0.09196723  | 0.017105954 | 0         |
| <b>yehM</b> | gi 49175990 ref NC_000913.2 | + | 2203717 | 2205996 | 42.91278387 | 58.0227282  | 57.5774747  | 55.18525673 | 85.9283081  | -0.433800793 | 0.758242163 | 0.3450565 |
| <b>yehP</b> | gi 49175990 ref NC_000913.2 | + | 2205989 | 2207125 | 17.36420658 | 21.88226953 | 21.39505907 | 20.28408423 | 26.77993588 | -0.240472675 | 0.22613245  | 0.0788232 |
| <b>yehR</b> | gi 49175990 ref NC_000913.2 | + | 2209247 | 2209708 | 43.94941231 | 48.463332   | 25.14310375 | 50.27119758 | 54.65255001 | 0.05536597   | 0.116785613 | 0.0329224 |
| <b>yehS</b> | gi 49175990 ref NC_000913.2 | - | 2209748 | 2210218 | 658.7083271 | 663.9178534 | 553.2801211 | 532.6385575 | 576.4915155 | 0.253911921  | 0.630308236 | 0.28237   |
| <b>yehT</b> | gi 49175990 ref NC_000913.2 | - | 2210265 | 2210984 | 197.0053657 | 150.9108615 | 219.3906532 | 163.9454513 | 182.9112773 | -0.07125252  | 0.189699399 | 0.0611353 |
| <b>yehU</b> | gi 49175990 ref NC_000913.2 | - | 2210981 | 2212666 | 313.5009238 | 321.04262   | 440.1245533 | 347.8969681 | 452.9814005 | -0.380956025 | 1.036511758 | 0.5193573 |
| <b>mlrA</b> | gi 49175990 ref NC_000913.2 | + | 2212888 | 2213619 | 224.7333741 | 215.5855583 | 244.1573614 | 293.334574  | 196.6990422 | -0.147059729 | 0.743407119 | 0.3161804 |
| <b>yohO</b> | gi 49175990 ref NC_000913.2 | + | 2213679 | 2213786 | 608.8916144 | 607.8745222 | 495.7836962 | 646.6770547 | 614.6105668 | 0.0435052    | 0.096547516 | 0.0259602 |
| <b>yehW</b> | gi 49175990 ref NC_000913.2 | - | 2213767 | 2214498 | 961.1608247 | 913.6908969 | 776.6617465 | 945.989346  | 820.0711966 | 0.146175302  | 0.300935454 | 0.11561   |
| <b>yehX</b> | gi 49175990 ref NC_000913.2 | - | 2214503 | 2215429 | 430.1690836 | 371.3069818 | 524.1954015 | 388.9330084 | 196.0901998 | 0.167673115  | 0.167063335 | 0.0526132 |
| <b>yehY</b> | gi 49175990 ref NC_000913.2 | - | 2215422 | 2216579 | 470.2534042 | 444.4821947 | 454.9439857 | 391.1304239 | 247.4328188 | 0.353785084  | 0.743407119 | 0.3161804 |
| <b>osmF</b> | gi 49175990 ref NC_000913.2 | - | 2216586 | 2217503 | 492.112923  | 497.7022937 | 530.6403352 | 428.2968838 | 332.5152524 | 0.217179737  | 0.417040222 | 0.1708749 |
| <b>bgIX</b> | gi 49175990 ref NC_000913.2 | - | 2217714 | 2220011 | 1067.836257 | 1004.867997 | 976.0562617 | 827.618669  | 929.8806148 | 0.199873879  | 0.407999432 | 0.1664204 |
| <b>dlid</b> | gi 49175990 ref NC_000913.2 | + | 2220207 | 2221922 | 1600.295772 | 1552.923637 | 2695.365581 | 2566.224031 | 2166.364292 | -0.639916347 | 2.224545342 | 1.373408  |
| <b>pbpG</b> | gi 49175990 ref NC_000913.2 | - | 2221960 | 2222892 | 421.5755141 | 409.3513939 | 423.2982718 | 424.9327204 | 431.8514936 | -0.034857331 | 0.059855737 | 0.0118829 |
| <b>yohC</b> | gi 49175990 ref NC_000913.2 | - | 2223066 | 2223653 | 92.43586699 | 103.5664311 | 160.7153795 | 149.9616979 | 80.2906304  | -0.408815926 | 0.850775385 | 0.3986199 |
| <b>yohD</b> | gi 49175990 ref NC_000913.2 | + | 2223823 | 2224401 | 523.3767813 | 477.7097083 | 702.8915104 | 794.4742119 | 512.0247047 | -0.403647286 | 1.107168634 | 0.5620864 |
| <b>yohF</b> | gi 49175990 ref NC_000913.2 | - | 2224531 | 2225292 | 210.528721  | 172.7825646 | 192.1162218 | 231.5406799 | 122.8696879 | 0.10092631   | 0.103849699 | 0.0277229 |
| <b>yohP</b> | gi 49175990 ref NC_000913.2 | + | 2227004 | 2227087 | 235.0177006 | 260.2882613 | 432.6779735 | 422.7809669 | 474.3493707 | -0.855138566 | 3.729952227 | 2.6332554 |
| <b>dusC</b> | gi 49175990 ref NC_000913.2 | - | 2227460 | 2228407 | 192.091456  | 214.6999928 | 172.9126339 | 136.9100858 | 130.3331483 | 0.468801698  | 1.327525245 | 0.716306  |
| <b>yohJ</b> | gi 49175990 ref NC_000913.2 | + | 2228646 | 2229044 | 262.6354595 | 248.8233224 | 340.1627056 | 262.5931671 | 288.3554848 | -0.19770701  | 0.451091985 | 0.1869433 |

|       |                             |   |         |         |             |             |             |             |             |              |             |           |
|-------|-----------------------------|---|---------|---------|-------------|-------------|-------------|-------------|-------------|--------------|-------------|-----------|
| yohK  | gi 49175990 ref NC_000913.2 | + | 2229041 | 2229736 | 254.9579114 | 249.7874622 | 367.2516417 | 212.4202724 | 283.8356516 | -0.1662736   | 0.347192619 | 0.1372978 |
| cdd   | gi 49175990 ref NC_000913.2 | + | 2229866 | 2230750 | 1496.188682 | 1448.443235 | 3096.471857 | 2543.872969 | 1947.854386 | -0.758474037 | 2.715016015 | 1.7854371 |
| sanA  | gi 49175990 ref NC_000913.2 | + | 2230900 | 2231619 | 206.614317  | 229.8955354 | 204.2907542 | 174.0555463 | 228.5812402 | 0.09593528   | 0.195057926 | 0.0639399 |
| yeiS  | gi 49175990 ref NC_000913.2 | + | 2231622 | 2231861 | 56.67668735 | 58.89565498 | 51.92699125 | 43.98337303 | 66.98540963 | 0.083235926  | 0.125437268 | 0.037135  |
| preB  | gi 49175990 ref NC_000913.2 | + | 2232055 | 2232393 | 122.5363458 | 115.8516932 | 672.2477387 | 751.845452  | 459.3666741 | -2.383388901 | 18.71841935 | 16.187686 |
| preA  | gi 49175990 ref NC_000913.2 | + | 2233287 | 2234522 | 109.0365007 | 113.0367072 | 824.6834331 | 749.6338244 | 325.1569098 | -2.491785623 | 14.14805881 | 11.936084 |
| mgIC  | gi 49175990 ref NC_000913.2 | - | 2234765 | 2235775 | 97.07362027 | 99.73567988 | 122.5176651 | 115.737432  | 165.5930114 | -0.460891784 | 1.155967657 | 0.5921291 |
| mgIA  | gi 49175990 ref NC_000913.2 | - | 2235791 | 2237311 | 165.8169312 | 171.9263396 | 122.0337868 | 150.4193302 | 224.7681731 | 0.00368067   | 0.038681303 | 0.0042561 |
| mgIB  | gi 49175990 ref NC_000913.2 | - | 2237372 | 2238370 | 144.0442261 | 133.890877  | 196.1099824 | 285.5635743 | 254.5692402 | -0.82502876  | 2.99126399  | 2.006662  |
| galS  | gi 49175990 ref NC_000913.2 | - | 2238650 | 2239690 | 97.33812138 | 90.20096712 | 182.101057  | 210.6131197 | 188.5148476 | -1.040706719 | 4.744847923 | 3.5096819 |
| yeiB  | gi 49175990 ref NC_000913.2 | - | 2239832 | 2240989 | 384.4217872 | 364.7000389 | 331.672789  | 342.9941379 | 314.1938478 | 0.192214545  | 0.411771113 | 0.1679059 |
| foleE | gi 49175990 ref NC_000913.2 | - | 2241006 | 2241674 | 1459.561426 | 1424.701876 | 1012.718638 | 1179.251922 | 1061.219521 | 0.409680516  | 1.271533306 | 0.6657192 |
| yeiG  | gi 49175990 ref NC_000913.2 | + | 2241932 | 2242768 | 743.4451637 | 710.4338501 | 1192.772381 | 1236.555893 | 1161.073163 | -0.712988227 | 2.933601922 | 1.9621768 |
| cirA  | gi 49175990 ref NC_000913.2 | - | 2242800 | 2244791 | 353.2433158 | 362.8358147 | 274.8260124 | 234.6736736 | 340.5846589 | 0.331605827  | 0.85254375  | 0.3997838 |
| lysP  | gi 49175990 ref NC_000913.2 | - | 2245085 | 2246554 | 990.5728141 | 1010.604966 | 924.4303704 | 912.5325696 | 797.7676694 | 0.189353491  | 0.415695236 | 0.1699565 |
| yeiE  | gi 49175990 ref NC_000913.2 | - | 2246759 | 2247640 | 1000.34732  | 933.628337  | 1245.223376 | 1121.185079 | 1043.408018 | -0.215906326 | 0.533241632 | 0.2291084 |
| yeiH  | gi 49175990 ref NC_000913.2 | + | 2247739 | 2248788 | 213.5430315 | 238.4455788 | 216.2400453 | 220.8166233 | 206.4834237 | 0.061057902  | 0.126909468 | 0.0373086 |
| nfo   | gi 49175990 ref NC_000913.2 | + | 2248862 | 2249719 | 573.704672  | 548.016147  | 488.2357008 | 476.5391943 | 493.5394494 | 0.213198451  | 0.486859532 | 0.2053306 |
| yeiI  | gi 49175990 ref NC_000913.2 | + | 2249722 | 2250810 | 482.7808604 | 469.1897974 | 483.6897525 | 429.4584801 | 406.2411202 | 0.125668566  | 0.225197279 | 0.0787279 |
| nupX  | gi 49175990 ref NC_000913.2 | - | 2250917 | 2252167 | 34.24025841 | 30.3618681  | 44.43173845 | 33.71641944 | 30.46591476 | -0.137165645 | 0.207492207 | 0.0702944 |
| rihB  | gi 49175990 ref NC_000913.2 | - | 2252267 | 2253208 | 6.430974157 | 13.37266653 | 12.22101852 | 15.65840579 | 15.66614334 | -0.616515229 | 0.655192172 | 0.2935851 |
| yeiL  | gi 49175990 ref NC_000913.2 | + | 2253377 | 2254036 | 20.66570014 | 22.80953107 | 15.1567929  | 23.44982591 | 23.46129959 | 0.048724509  | 0.070942711 | 0.0170551 |
| psuT  | gi 49175990 ref NC_000913.2 | - | 2254107 | 2255357 | 89.39261728 | 95.95189644 | 106.9290733 | 83.17709286 | 95.35204916 | -0.038062156 | 0.045665201 | 0.0069576 |
| psuG  | gi 49175990 ref NC_000913.2 | - | 2255451 | 2256389 | 31.19014274 | 25.59849499 | 18.73776761 | 20.18673728 | 21.27596853 | 0.517390332  | 0.879653172 | 0.4177241 |
| psuK  | gi 49175990 ref NC_000913.2 | - | 2256377 | 2257318 | 12.9972439  | 7.539204589 | 6.9116666   | 12.18604611 | 7.915231371 | 0.225545725  | 0.14219247  | 0.0427363 |
| fruA  | gi 49175990 ref NC_000913.2 | - | 2257741 | 2259432 | 862.5247439 | 603.9168212 | 1905.834169 | 1708.218208 | 744.7215104 | -0.913197115 | 2.953091654 | 1.974621  |
| fruK  | gi 49175990 ref NC_000913.2 | - | 2259449 | 2260387 | 323.3126701 | 297.2502144 | 958.6632803 | 893.0660683 | 355.5014611 | -1.210655978 | 4.359391386 | 3.1727228 |
| fruB  | gi 49175990 ref NC_000913.2 | - | 2260387 | 2261517 | 400.9074035 | 371.3380574 | 1067.378128 | 1102.883609 | 724.069927  | -1.302108881 | 7.474830989 | 5.9141346 |
| setB  | gi 49175990 ref NC_000913.2 | + | 2261885 | 2263066 | 238.5267946 | 235.5437075 | 260.4222462 | 266.928375  | 308.2623801 | -0.235557954 | 0.514600781 | 0.2209121 |
| yeiW  | gi 49175990 ref NC_000913.2 | - | 2263063 | 2263317 | 181.223287  | 171.8902153 | 180.9321447 | 198.4583521 | 217.4412034 | -0.171412668 | 0.319454427 | 0.1244053 |
| yeiP  | gi 49175990 ref NC_000913.2 | + | 2263472 | 2264044 | 314.2456831 | 310.5790458 | 265.9126893 | 250.3316422 | 368.5206701 | 0.077613364  | 0.142312715 | 0.0427363 |
| yeiQ  | gi 49175990 ref NC_000913.2 | + | 2264267 | 2265733 | 290.4333415 | 332.4899182 | 395.4008066 | 447.0648564 | 345.7717849 | -0.365343722 | 0.892966342 | 0.4276261 |
| yeiR  | gi 49175990 ref NC_000913.2 | + | 2265851 | 2266837 | 576.1219273 | 567.9766445 | 333.2116393 | 318.5693332 | 380.0512583 | 0.733613725  | 3.191314892 | 2.1679878 |
| lpxT  | gi 49175990 ref NC_000913.2 | + | 2266876 | 2267589 | 487.8165889 | 475.8401471 | 266.2331661 | 290.5535582 | 390.9785233 | 0.600765544  | 2.123834246 | 1.2956752 |
| spr   | gi 49175990 ref NC_000913.2 | + | 2268001 | 2268567 | 407.7265795 | 4359.664374 | 3520.966307 | 3768.474017 | 5707.73324  | -0.062664121 | 0.052460421 | 0.0090435 |
| rtn   | gi 49175990 ref NC_000913.2 | + | 2268748 | 2270304 | 655.2930492 | 713.3441767 | 623.0092045 | 694.0603096 | 824.1290934 | -0.082367036 | 0.100849812 | 0.0266333 |
| yeiA  | gi 49175990 ref NC_000913.2 | + | 2270386 | 2272200 | 596.9319987 | 590.7738968 | 651.469573  | 683.8050559 | 626.0319908 | -0.137390487 | 0.27715563  | 0.1038347 |
| yeiB  | gi 49175990 ref NC_000913.2 | + | 2272201 | 2273295 | 334.8842832 | 350.4965915 | 291.8597033 | 269.227743  | 307.2356911 | 0.238048188  | 0.569833511 | 0.2490619 |
| yeiE  | gi 49175990 ref NC_000913.2 | + | 2273295 | 2274320 | 343.3859816 | 327.6601493 | 319.3890478 | 308.2622233 | 270.5458281 | 0.175813057  | 0.342490179 | 0.1341942 |
| yeiF  | gi 49175990 ref NC_000913.2 | + | 2274322 | 2275911 | 1321.358806 | 1294.579451 | 1304.408494 | 1445.003638 | 1303.545717 | -0.046389531 | 0.075570843 | 0.0183319 |
| yeiG  | gi 49175990 ref NC_000913.2 | - | 2275915 | 2276259 | 1225.170465 | 1299.366389 | 1980.735977 | 2260.983675 | 1616.816738 | -0.636872549 | 2.069094187 | 1.2518049 |
| bcr   | gi 49175990 ref NC_000913.2 | - | 2276592 | 2277782 | 1350.591354 | 1495.048392 | 1027.401047 | 1101.008036 | 1224.721083 | 0.327364394  | 0.956791941 | 0.4664353 |
| rsuA  | gi 49175990 ref NC_000913.2 | - | 2277810 | 2278505 | 1072.745336 | 1050.477655 | 769.5287405 | 735.5797639 | 804.1917654 | 0.466749545  | 1.527640764 | 0.8476199 |
| yeiH  | gi 49175990 ref NC_000913.2 | + | 2278654 | 2280414 | 457.7184851 | 421.6753204 | 469.5273304 | 444.0447282 | 457.6746296 | -0.04237468  | 0.093437838 | 0.024853  |
| rplY  | gi 49175990 ref NC_000913.2 | + | 2280539 | 2280823 | 5677.393829 | 5222.02038  | 3342.346402 | 4224.667601 | 6213.544557 | 0.23756515   | 0.481809423 | 0.2027145 |
| yeiJ  | gi 49175990 ref NC_000913.2 | - | 2280962 | 2281969 | 648.7455761 | 628.756678  | 537.3490835 | 500.1902681 | 574.1843179 | 0.25417231   | 0.604886988 | 0.2677516 |
| yeiL  | gi 49175990 ref NC_000913.2 | + | 2282151 | 2282378 | 996.8498661 | 926.7563    | 709.3099618 | 792.7396333 | 964.2998957 | 0.284838728  | 0.755245531 | 0.3439111 |
| yeiM  | gi 49175990 ref NC_000913.2 | + | 2282398 | 2284158 | 2015.345897 | 2040.197319 | 1625.556864 | 1656.008505 | 1838.351016 | 0.243316449  | 0.564229041 | 0.2463254 |
| insH  | gi 49175990 ref NC_000913.2 | - | 2287087 | 2288103 | 857.2394301 | 925.1485397 | 902.5581202 | 1018.988302 | 956.8556813 | -0.121887586 | 0.196381615 | 0.0644562 |
| narP  | gi 49175990 ref NC_000913.2 | + | 2288522 | 2289169 | 276.8670915 | 286.8543599 | 315.6195229 | 243.3504753 | 191.1630662 | 0.187218668  | 0.324702415 | 0.1265159 |
| ccmH  | gi 49175990 ref NC_000913.2 | - | 2289380 | 2290432 | 452.6481308 | 419.778674  | 1236.717713 | 1066.176241 | 838.3840582 | -1.238571361 | 7.169816356 | 5.6426873 |
| ccmG  | gi 49175990 ref NC_000913.2 | - | 2290429 | 2290986 | 307.0060172 | 273.4917019 | 824.5002498 | 765.6573181 | 615.0766661 | -1.315196767 | 8.247174354 | 6.6149835 |
| ccmF  | gi 49175990 ref NC_000913.2 | - | 2290983 | 2292926 | 686.9128832 | 608.7697172 | 1862.495374 | 1561.661389 | 1062.923058 | -1.170933109 | 5.808355858 | 4.4300586 |
| ccmE  | gi 49175990 ref NC_000913.2 | - | 2292923 | 2293402 | 611.6790858 | 565.0974637 | 1338.617124 | 991.3167758 | 960.4924621 | -0.870108101 | 3.888562942 | 2.7656595 |
| ccmD  | gi 49175990 ref NC_000913.2 | - | 2293399 | 2293608 | 263.8407225 | 254.5298804 | 676.6022515 | 523.6969917 | 456.9255155 | -1.06934842  | 5.28848605  | 3.9903255 |
| ccmC  | gi 49175990 ref NC_000913.2 | - | 2293605 | 2294342 | 538.8766429 | 533.7856211 | 1367.062303 | 824.4796633 | 884.2424369 | -0.907404268 | 3.881364318 | 2.7600006 |
| ccmB  | gi 49175990 ref NC_000913.2 | - | 2294384 | 2295046 | 297.2745116 | 287.7745777 | 692.784454  | 482.478934  | 582.2030233 | -0.983160951 | 4.853958025 | 3.5974284 |

|             |                             |   |         |         |             |             |             |             |             |              |             |           |
|-------------|-----------------------------|---|---------|---------|-------------|-------------|-------------|-------------|-------------|--------------|-------------|-----------|
| <b>ccmA</b> | gi 49175990 ref NC_000913.2 | - | 2295043 | 2295666 | 783.4175048 | 844.4138118 | 1946.407856 | 1150.941408 | 1788.944023 | -0.996154895 | 4.145241507 | 2.9855762 |
| <b>napC</b> | gi 49175990 ref NC_000913.2 | - | 2295679 | 2296281 | 780.56397   | 770.2869093 | 2066.542723 | 1050.144305 | 1708.265128 | -1.02819381  | 4.168621499 | 3.0043113 |
| <b>napB</b> | gi 49175990 ref NC_000913.2 | - | 2296291 | 2296740 | 596.6848644 | 635.4491258 | 1564.299314 | 600.7692689 | 1191.140792 | -0.838435556 | 2.477692611 | 1.5846159 |
| <b>napH</b> | gi 49175990 ref NC_000913.2 | - | 2296737 | 2297600 | 1220.86253  | 1254.710149 | 3224.75406  | 998.924627  | 2319.605932 | -0.783428355 | 1.899068165 | 1.1235745 |
| <b>napG</b> | gi 49175990 ref NC_000913.2 | - | 2297587 | 2298282 | 716.6851862 | 614.4535634 | 2034.893203 | 580.7046958 | 1097.320557 | -0.822706206 | 2.138555068 | 1.3067919 |
| <b>napA</b> | gi 49175990 ref NC_000913.2 | - | 2298289 | 2300775 | 4149.159961 | 3760.253152 | 6552.296408 | 1612.34719  | 5324.435488 | -0.134772319 | 0.215398322 | 0.0745623 |
| <b>napD</b> | gi 49175990 ref NC_000913.2 | - | 2300772 | 2301035 | 500.4299684 | 489.1384176 | 605.7431312 | 139.197181  | 908.1822611 | -0.144756504 | 0.145728734 | 0.043805  |
| <b>napF</b> | gi 49175990 ref NC_000913.2 | - | 2301025 | 2301519 | 1033.287192 | 1115.111113 | 1304.364817 | 486.7923241 | 3442.342964 | -0.729804577 | 0.948141504 | 0.4620781 |
| <b>eco</b>  | gi 49175990 ref NC_000913.2 | + | 2301927 | 2302415 | 1327.971807 | 1429.497835 | 1258.489196 | 1060.784534 | 1126.275206 | 0.260399896  | 0.646240469 | 0.2889364 |
| <b>mgo</b>  | gi 49175990 ref NC_000913.2 | - | 2303130 | 2304776 | 436.7224463 | 350.3797831 | 270.3194564 | 316.7689035 | 174.4789431 | 0.667191639  | 1.949399266 | 1.1616638 |
| <b>yojI</b> | gi 49175990 ref NC_000913.2 | - | 2304994 | 2306637 | 458.5977573 | 392.1984886 | 183.3385086 | 190.6145827 | 200.7064687 | 1.169347336  | 6.729260357 | 5.2496797 |
| <b>alkB</b> | gi 49175990 ref NC_000913.2 | - | 2306713 | 2307363 | 99.82205236 | 73.02704156 | 137.5549667 | 75.51859563 | 87.70800066 | -0.15128661  | 0.359309023 | 0.1424431 |
| <b>ada</b>  | gi 49175990 ref NC_000913.2 | - | 2307363 | 2308427 | 330.1608685 | 312.459656  | 356.852936  | 358.7413822 | 343.3186791 | -0.127021342 | 0.268006161 | 0.098686  |
| <b>apbE</b> | gi 49175990 ref NC_000913.2 | - | 2308501 | 2309556 | 391.1099644 | 400.827376  | 332.6944303 | 274.9443399 | 334.1493607 | 0.336028356  | 0.90720137  | 0.4368512 |
| <b>ompC</b> | gi 49175990 ref NC_000913.2 | - | 2309668 | 2310771 | 63112.38966 | 70358.30377 | 75729.93686 | 88769.80218 | 83931.48518 | -0.333936691 | 0.708310832 | 0.3175779 |
| <b>rcsD</b> | gi 49175990 ref NC_000913.2 | + | 2311510 | 2314182 | 2911.83635  | 3086.912341 | 2971.654579 | 2900.382368 | 2725.9374   | 0.060048048  | 0.120774189 | 0.035482  |
| <b>rcsB</b> | gi 49175990 ref NC_000913.2 | + | 2314199 | 2314849 | 1764.623144 | 1965.6549   | 1717.066439 | 1827.429649 | 1831.750325 | 0.180236345  | 0.05452062  | 0.0097454 |
| <b>rcsC</b> | gi 49175990 ref NC_000913.2 | - | 2315049 | 2317898 | 1552.174562 | 1578.590999 | 1219.270138 | 1148.188457 | 1280.906874 | 0.362025113  | 1.043734897 | 0.5210963 |
| <b>atoS</b> | gi 49175990 ref NC_000913.2 | + | 2318065 | 2319891 | 188.1321456 | 180.4429033 | 221.2145497 | 295.7870627 | 290.3758088 | -0.553406279 | 1.661300595 | 0.9513929 |
| <b>atoC</b> | gi 49175990 ref NC_000913.2 | + | 2319888 | 2321273 | 133.2811135 | 125.3474303 | 152.7388729 | 183.5524762 | 134.8784185 | -0.274018211 | 0.597400592 | 0.2647326 |
| <b>atoD</b> | gi 49175990 ref NC_000913.2 | + | 2321469 | 2322131 | 18.89251215 | 18.99262747 | 19.90917078 | 21.25085606 | 18.02357286 | -0.055744772 | 0.01476176  | 0         |
| <b>atoA</b> | gi 49175990 ref NC_000913.2 | + | 2322131 | 2322781 | 6.246990994 | 6.648742113 | 5.357235097 | 7.738739117 | 3.471079833 | 0.220508297  | 0.070320283 | 0.0170551 |
| <b>atoB</b> | gi 49175990 ref NC_000913.2 | + | 2322778 | 2324100 | 20.30269746 | 18.02173311 | 26.23211857 | 17.0353077  | 25.70398667 | -0.240472675 | 0.311020209 | 0.1212266 |
| <b>atoE</b> | gi 49175990 ref NC_000913.2 | + | 2324131 | 2325315 | 27.24473276 | 37.11183355 | 39.47021637 | 33.69082076 | 32.61996555 | -0.156262795 | 0.165066991 | 0.0519869 |
| <b>yfaP</b> | gi 49175990 ref NC_000913.2 | - | 2325389 | 2326165 | 79.68197057 | 73.10262191 | 86.10853791 | 125.4504748 | 138.7678056 | -0.618874583 | 1.77028185  | 1.0325237 |
| <b>yfaQ</b> | gi 49175990 ref NC_000913.2 | - | 2326170 | 2327819 | 80.23836121 | 75.96227254 | 61.1890673  | 59.51804053 | 69.41766027 | 0.30612669   | 0.641850367 | 0.286746  |
| <b>yfaT</b> | gi 49175990 ref NC_000913.2 | - | 2332358 | 2332981 | 21.00636406 | 28.55310443 | 16.94467234 | 26.6594507  | 0.270366598 | 0.41144496   | 0.1678377   |           |
| <b>yfaA</b> | gi 49175990 ref NC_000913.2 | - | 2332978 | 2334666 | 90.58859331 | 99.70606018 | 96.86549231 | 78.78662755 | 114.1143446 | -0.032626449 | 0.023991311 | 0.0005477 |
| <b>gyrA</b> | gi 49175990 ref NC_000913.2 | - | 2334815 | 2337442 | 6196.947479 | 6357.098222 | 5707.158822 | 5063.220626 | 5266.586307 | 0.233314241  | 0.522148366 | 0.2235589 |
| <b>ubiG</b> | gi 49175990 ref NC_000913.2 | + | 2337589 | 2338311 | 842.0596421 | 764.5493751 | 764.4912299 | 762.4945669 | 874.750227  | 0.015173643  | 0.010311658 | 0         |
| <b>yfaL</b> | gi 49175990 ref NC_000913.2 | - | 2338439 | 2342191 | 442.5449793 | 411.2313148 | 461.3747582 | 451.7486832 | 392.8252636 | -0.013414288 | 0.040386754 | 0.0045376 |
| <b>nrda</b> | gi 49175990 ref NC_000913.2 | + | 2342887 | 2345172 | 3765.810737 | 3742.25101  | 2154.938755 | 2458.483294 | 2194.19876  | 0.723225029  | 3.084469235 | 2.0841492 |
| <b>nrdb</b> | gi 49175990 ref NC_000913.2 | + | 2345406 | 2346536 | 1104.55434  | 1204.398464 | 951.4580163 | 998.9029357 | 985.9976345 | 0.22362037   | 0.577386949 | 0.2530904 |
| <b>yfaE</b> | gi 49175990 ref NC_000913.2 | + | 2346536 | 2346790 | 298.4146477 | 300.1387926 | 235.0389011 | 241.0739332 | 253.4358156 | 0.296288758  | 0.776562157 | 0.3557147 |
| <b>inaA</b> | gi 49175990 ref NC_000913.2 | - | 2346844 | 2347494 | 627.3951487 | 589.8004478 | 546.6539066 | 541.549402  | 556.3571728 | 0.159361695  | 0.316328262 | 0.1237082 |
| <b>glpQ</b> | gi 49175990 ref NC_000913.2 | - | 2347957 | 2349033 | 4655.581897 | 4551.482687 | 14502.90091 | 11821.53245 | 12057.66445 | -1.460855415 | 8.776988859 | 7.0755595 |
| <b>glpT</b> | gi 49175990 ref NC_000913.2 | - | 2349038 | 2350396 | 5633.854575 | 5182.128303 | 19347.1395  | 16794.90379 | 17753.72291 | -1.713915253 | 11.55081286 | 9.6569018 |
| <b>glpA</b> | gi 49175990 ref NC_000913.2 | + | 2350669 | 2352297 | 5710.305453 | 5109.929486 | 17559.00333 | 13605.20024 | 11549.81555 | -1.361626451 | 7.263839777 | 5.7331066 |
| <b>glpB</b> | gi 49175990 ref NC_000913.2 | + | 2352287 | 2353546 | 5678.843492 | 4959.847724 | 15542.23598 | 11688.07052 | 9919.957934 | -1.179509511 | 5.668832445 | 4.3183907 |
| <b>glpC</b> | gi 49175990 ref NC_000913.2 | + | 2353543 | 2354733 | 4214.844653 | 3756.445961 | 10129.2784  | 8000.53558  | 6285.60093  | -0.994121931 | 4.21815436  | 3.0444026 |
| <b>yfaD</b> | gi 49175990 ref NC_000913.2 | + | 2354926 | 2355825 | 123.5223311 | 129.1873147 | 195.0172329 | 205.0624687 | 180.7383068 | -0.62017634  | 1.992994693 | 1.1939846 |
| <b>ypaA</b> | gi 49175990 ref NC_000913.2 | + | 2355838 | 2356023 | 79.52591916 | 77.87315641 | 69.70844712 | 79.68989882 | 101.7348338 | -0.096935864 | 0.12859712  | 0.0374598 |
| <b>rhmA</b> | gi 49175990 ref NC_000913.2 | - | 2356064 | 2356867 | 56.60491429 | 60.8055969  | 48.0025192  | 45.01093207 | 60.33877983 | 0.188062809  | 0.334919041 | 0.1322052 |
| <b>rhmT</b> | gi 49175990 ref NC_000913.2 | - | 2356885 | 2358174 | 27.02240427 | 28.50141188 | 46.94740175 | 32.65057138 | 31.57787648 | -0.404127747 | 0.681465209 | 0.3053082 |
| <b>rhmD</b> | gi 49175990 ref NC_000913.2 | - | 2358231 | 2359436 | 32.09199956 | 33.24730686 | 63.53916205 | 64.93844246 | 54.00925383 | -0.894571012 | 2.898352031 | 1.9331534 |
| <b>rhmR</b> | gi 49175990 ref NC_000913.2 | - | 2359451 | 2360233 | 23.6303002  | 29.48697642 | 47.51526816 | 41.55627044 | 42.66926543 | -0.73977877  | 1.790201427 | 1.0459831 |
| <b>yfaY</b> | gi 49175990 ref NC_000913.2 | - | 2360453 | 2361655 | 699.0549566 | 712.3633965 | 823.233144  | 750.0255811 | 647.5262074 | -0.062986433 | 0.120384545 | 0.0352556 |
| <b>yfaZ</b> | gi 49175990 ref NC_000913.2 | - | 2361755 | 2362297 | 55.84503418 | 63.67379158 | 68.10960393 | 63.68873852 | 33.0359209  | 0.12064871   | 0.16368217  | 0.0518508 |
| <b>nudI</b> | gi 49175990 ref NC_000913.2 | + | 2362576 | 2363001 | 74.99743685 | 76.93896403 | 84.24955484 | 88.74794076 | 122.9727616 | -0.389012762 | 0.847580353 | 0.3971622 |
| <b>ais</b>  | gi 49175990 ref NC_000913.2 | - | 2363040 | 2363642 | 6.141898866 | 18.17716224 | 9.956943686 | 12.33463606 | 17.69219546 | -0.102488971 | 0           | 0         |
| <b>arnB</b> | gi 49175990 ref NC_000913.2 | + | 2363950 | 2365089 | 136.5958683 | 152.0079789 | 109.2017213 | 137.628436  | 110.0719478 | 0.259031446  | 0.62455875  | 0.2789898 |
| <b>arnC</b> | gi 49175990 ref NC_000913.2 | + | 2365093 | 2366061 | 98.07042139 | 87.33784338 | 83.37827326 | 79.59918528 | 74.13996044 | 0.248208104  | 0.46077842  | 0.1934841 |
| <b>arnA</b> | gi 49175990 ref NC_000913.2 | + | 2366061 | 2368043 | 243.4799047 | 247.9043315 | 231.460191  | 285.6931378 | 261.3604207 | -0.089054948 | 0.129024345 | 0.0376665 |
| <b>arnD</b> | gi 49175990 ref NC_000913.2 | + | 2368040 | 2368930 | 98.21532801 | 82.56509408 | 65.94291185 | 99.50806721 | 88.55662619 | 0.101178163  | 0.145919611 | 0.0438611 |
| <b>arnT</b> | gi 49175990 ref NC_000913.2 | + | 2368930 | 2370582 | 114.9383695 | 174.929756  | 144.7269091 | 141.3488258 | 155.8224069 | -0.079302528 | 0.023690149 | 0.0005477 |
| <b>arnE</b> | gi 49175990 ref NC_000913.2 | + | 2370579 | 2370914 | 37.83620493 | 72.3788956  | 44.63419526 | 81.27258897 | 48.47388413 | -0.166377349 | 0.073720807 | 0.0175681 |
| <b>arnF</b> | gi 49175990 ref NC_000913.2 | + | 2370914 | 2371300 | 139.9448793 | 145.3317723 | 160.0207561 | 202.7986623 | 205.1236351 | -0.423890318 | 1.036200361 | 0.5193573 |

|             |                             |   |         |         |             |             |             |             |             |              |             |           |
|-------------|-----------------------------|---|---------|---------|-------------|-------------|-------------|-------------|-------------|--------------|-------------|-----------|
| <b>pnrD</b> | gi 49175990 ref NC_000913.2 | - | 2371294 | 2371560 | 361.6175611 | 352.3644056 | 461.3495366 | 540.4504783 | 655.7999082 | -0.638807481 | 2.261565079 | 1.4041677 |
| <b>menE</b> | gi 49175990 ref NC_000913.2 | - | 2371670 | 2373025 | 889.5857707 | 762.6234519 | 1178.092613 | 822.1363353 | 896.4362917 | -0.186255023 | 0.471901027 | 0.1985574 |
| <b>menC</b> | gi 49175990 ref NC_000913.2 | - | 2373022 | 2373984 | 1521.012597 | 1385.726989 | 1932.725771 | 1244.901544 | 1431.498527 | -0.046668043 | 0.125257755 | 0.037135  |
| <b>menB</b> | gi 49175990 ref NC_000913.2 | - | 2373984 | 2374841 | 1067.118042 | 1029.574808 | 1364.547886 | 794.2926782 | 960.3859923 | 0.041281985  | 0.020380896 | 0         |
| <b>menH</b> | gi 49175990 ref NC_000913.2 | - | 2374856 | 2375614 | 412.5277437 | 427.4271221 | 628.4700208 | 628.2577496 | 470.0993517 | -0.202483964 | 0.035959319 | 0.1778877 |
| <b>menD</b> | gi 49175990 ref NC_000913.2 | - | 2375611 | 2377281 | 947.2098241 | 918.4492369 | 1298.157423 | 1018.286047 | 1171.083261 | -0.304045725 | 0.805950004 | 0.3714324 |
| <b>menF</b> | gi 49175990 ref NC_000913.2 | - | 2377370 | 2378665 | 1308.129538 | 1273.680648 | 1246.745287 | 1082.085659 | 1184.534798 | 0.149343361  | 0.294334459 | 0.113293  |
| <b>elaB</b> | gi 49175990 ref NC_000913.2 | - | 2378744 | 2379049 | 2998.110292 | 3339.586526 | 3440.087055 | 3421.705632 | 3244.151245 | -0.102211209 | 0.156585567 | 0.0487535 |
| <b>elaA</b> | gi 49175990 ref NC_000913.2 | - | 2379104 | 2379565 | 224.321225  | 200.3591845 | 237.0086255 | 278.5841016 | 135.3115851 | -0.009393085 | 0.032390486 | 0.0030156 |
| <b>rbn</b>  | gi 49175990 ref NC_000913.2 | + | 2379630 | 2380547 | 259.5781075 | 291.6389346 | 227.1572769 | 231.0306388 | 257.8441244 | 0.188200537  | 0.449699995 | 0.1859429 |
| <b>elaD</b> | gi 49175990 ref NC_000913.2 | + | 2380735 | 2381946 | 14.7931162  | 10.40041227 | 4.60815537  | 14.39962061 | 12.26931749 | 0.274285702  | 0.216984566 | 0.0750873 |
| <b>yfbK</b> | gi 49175990 ref NC_000913.2 | - | 2382017 | 2383744 | 145.4784275 | 127.2191419 | 170.7794066 | 225.2023163 | 229.7623621 | -0.608577162 | 1.909430895 | 1.1320254 |
| <b>yfbL</b> | gi 49175990 ref NC_000913.2 | + | 2383882 | 2384853 | 12.68048512 | 11.37993701 | 11.7818164  | 9.035194688 | 10.1130619  | 0.241442148  | 0.154741081 | 0.0487535 |
| <b>yfbM</b> | gi 49175990 ref NC_000913.2 | + | 2384956 | 2385459 | 22.92548844 | 18.95800729 | 28.82813787 | 50.22586619 | 46.98366715 | -1.000276323 | 2.678894638 | 1.7539132 |
| <b>yfbN</b> | gi 49175990 ref NC_000913.2 | - | 2385732 | 2386448 | 5.911004058 | 2.810376305 | 6.47702521  | 3.453364355 | 5.595077156 | -0.168134034 | 0.007918306 | 0         |
| <b>yfbO</b> | gi 49175990 ref NC_000913.2 | + | 2386657 | 2387079 | 16.07164819 | 11.34800768 | 12.3886928  | 17.89006118 | 18.97416526 | -0.237380675 | 0.246921011 | 0.0903249 |
| <b>yfbP</b> | gi 49175990 ref NC_000913.2 | + | 2387138 | 2387986 | 162.5725972 | 173.8385222 | 179.738324  | 217.3761817 | 213.046013  | -0.29082714  | 0.592609391 | 0.2622281 |
| <b>nuoN</b> | gi 49175990 ref NC_000913.2 | - | 2388070 | 2389527 | 3481.404433 | 3293.916217 | 5626.934037 | 4947.56756  | 3945.569253 | -0.493987426 | 1.506616657 | 0.8296831 |
| <b>nuoM</b> | gi 49175990 ref NC_000913.2 | - | 2389534 | 2391063 | 3208.192617 | 3025.117891 | 5412.766863 | 4315.307878 | 3292.841278 | -0.449914948 | 1.276720283 | 0.678799  |
| <b>nuoL</b> | gi 49175990 ref NC_000913.2 | - | 2391227 | 2393068 | 3593.272752 | 3233.104285 | 7026.705746 | 4967.911946 | 3659.768815 | -0.569901421 | 1.680852532 | 0.9663607 |
| <b>nuoK</b> | gi 49175990 ref NC_000913.2 | - | 2393065 | 2393367 | 614.1375553 | 578.4035817 | 1533.382114 | 1012.48648  | 608.8649571 | -0.774352644 | 2.366373057 | 1.494446  |
| <b>nuoJ</b> | gi 49175990 ref NC_000913.2 | - | 2393364 | 2393918 | 1358.045548 | 1297.416938 | 3090.134659 | 2221.021075 | 1423.157902 | -0.721491971 | 2.151509358 | 1.3182961 |
| <b>nuoI</b> | gi 49175990 ref NC_000913.2 | - | 2393930 | 2394472 | 981.5144196 | 890.8739133 | 2114.038018 | 1531.585218 | 1142.556585 | -0.730487883 | 2.57868374  | 1.6659987 |
| <b>nuoH</b> | gi 49175990 ref NC_000913.2 | - | 2394487 | 2395464 | 2303.564304 | 2037.283501 | 4108.087119 | 2970.021663 | 2236.245967 | -0.473530613 | 1.30838469  | 0.6998487 |
| <b>nuoG</b> | gi 49175990 ref NC_000913.2 | - | 2395461 | 2398187 | 7075.014321 | 6596.404423 | 10455.57841 | 8075.683406 | 6452.73401  | -0.254641913 | 0.580720059 | 0.2552364 |
| <b>nuoF</b> | gi 49175990 ref NC_000913.2 | - | 2398240 | 2399577 | 3308.785627 | 2899.70797  | 5316.413744 | 3544.149049 | 2793.751704 | -0.275623048 | 0.666001128 | 0.2983796 |
| <b>nuoE</b> | gi 49175990 ref NC_000913.2 | - | 2399574 | 2400074 | 2353.790432 | 1874.817289 | 3810.753074 | 2586.689314 | 2101.592306 | -0.362729671 | 0.958635952 | 0.4666554 |
| <b>nuoC</b> | gi 49175990 ref NC_000913.2 | - | 2400077 | 2401867 | 5562.903759 | 4643.539173 | 8803.843549 | 6635.076121 | 5683.153916 | -0.418715445 | 1.192462962 | 0.6167758 |
| <b>nuoB</b> | gi 49175990 ref NC_000913.2 | - | 2401973 | 2402635 | 2917.539626 | 3071.711989 | 4567.124956 | 3943.139478 | 3658.211621 | -0.435313554 | 1.248034025 | 0.655153  |
| <b>nuoA</b> | gi 49175990 ref NC_000913.2 | - | 2402651 | 2403094 | 2418.312822 | 2623.41538  | 3556.484583 | 3383.566765 | 2970.594213 | -0.395895193 | 1.071329264 | 0.5380553 |
| <b>lrhA</b> | gi 49175990 ref NC_000913.2 | - | 2403725 | 2404663 | 827.4944237 | 762.6566631 | 1130.52668  | 1652.341048 | 1719.284461 | -0.923818983 | 3.902491382 | 2.7754506 |
| <b>alaA</b> | gi 49175990 ref NC_000913.2 | + | 2405583 | 2406800 | 770.2859308 | 801.6556589 | 752.1803156 | 727.6701361 | 740.3536834 | 0.082448021  | 0.17332096  | 0.0547682 |
| <b>yfbR</b> | gi 49175990 ref NC_000913.2 | + | 2406884 | 2407483 | 201.273406  | 247.0346321 | 325.8267979 | 288.1977142 | 273.8665153 | -0.420918397 | 1.090485731 | 0.5531888 |
| <b>yfbS</b> | gi 49175990 ref NC_000913.2 | - | 2407542 | 2409374 | 1013.015868 | 1118.921497 | 3269.499411 | 3009.045157 | 2323.549924 | -1.430780009 | 7.889284916 | 6.2879707 |
| <b>yfbT</b> | gi 49175990 ref NC_000913.2 | - | 2409461 | 2410111 | 1352.158856 | 1370.5806   | 1988.720205 | 1608.888008 | 1306.156621 | -0.248903715 | 0.564030835 | 0.2440999 |
| <b>yfbU</b> | gi 49175990 ref NC_000913.2 | - | 2410122 | 2410616 | 1872.400655 | 2088.684824 | 2256.483864 | 1990.215338 | 2215.368121 | -0.133211221 | 0.216654424 | 0.0750873 |
| <b>yfbV</b> | gi 49175990 ref NC_000913.2 | - | 2410699 | 2411154 | 530.4239697 | 566.1136807 | 630.3685773 | 615.623352  | 693.0783687 | -0.248377706 | 0.552479591 | 0.2392304 |
| <b>ackA</b> | gi 49175990 ref NC_000913.2 | + | 2411492 | 2412694 | 4253.93586  | 4561.975731 | 6536.380215 | 5500.584105 | 6382.582991 | -0.483153626 | 1.396853558 | 0.7596047 |
| <b>pta</b>  | gi 49175990 ref NC_000913.2 | + | 2412769 | 2414913 | 3549.705498 | 3218.860809 | 5189.538034 | 3975.94865  | 5009.531149 | -0.459641257 | 1.391084378 | 0.7552209 |
| <b>yfcC</b> | gi 49175990 ref NC_000913.2 | + | 2415103 | 2416623 | 369.8947652 | 352.3543634 | 561.7747241 | 481.4535704 | 813.6559631 | -0.7773698   | 2.822239681 | 1.8684235 |
| <b>yfcD</b> | gi 49175990 ref NC_000913.2 | - | 2416656 | 2417198 | 654.195955  | 678.1781541 | 471.2895651 | 476.5759219 | 536.0130214 | 0.420952556  | 1.407812675 | 0.7645093 |
| <b>yfcE</b> | gi 49175990 ref NC_000913.2 | - | 2417256 | 2417810 | 711.6594494 | 728.5123339 | 545.7078946 | 618.7540903 | 591.1417096 | 0.290818724  | 0.801924973 | 0.3701238 |
| <b>yfcF</b> | gi 49175990 ref NC_000913.2 | - | 2417863 | 2418507 | 278.6675125 | 297.3152196 | 249.3952864 | 268.9006354 | 222.3128533 | 0.214212572  | 0.5023701   | 0.2138914 |
| <b>yfcG</b> | gi 49175990 ref NC_000913.2 | + | 2418643 | 2419290 | 205.114433  | 247.0265301 | 161.5753658 | 169.0910448 | 125.9570711 | 0.54972772   | 1.804872942 | 1.0564929 |
| <b>folX</b> | gi 49175990 ref NC_000913.2 | + | 2419347 | 2419709 | 540.9794349 | 607.9295733 | 464.4397891 | 437.402167  | 505.7397101 | 0.274789251  | 0.766356107 | 0.3481721 |
| <b>yfcH</b> | gi 49175990 ref NC_000913.2 | + | 2419730 | 2420623 | 1245.179552 | 1161.582707 | 1418.697683 | 1496.770648 | 1639.798112 | -0.330574132 | 0.873729687 | 0.4140035 |
| <b>yfcI</b> | gi 49175990 ref NC_000913.2 | - | 2420671 | 2421561 | 155.6065629 | 134.8134315 | 149.0049997 | 162.5632141 | 172.6244398 | -0.139018154 | 0.275163558 | 0.1029688 |
| <b>hisP</b> | gi 49175990 ref NC_000913.2 | - | 2421758 | 2422531 | 77.57267956 | 77.88156375 | 56.70933587 | 59.22430411 | 38.4668047  | 0.600163263  | 1.602110283 | 0.8996072 |
| <b>hisM</b> | gi 49175990 ref NC_000913.2 | - | 2422539 | 2423255 | 74.22430215 | 61.67513962 | 58.99124728 | 46.04851859 | 41.69760792 | 0.50840294   | 1.103155478 | 0.5588208 |
| <b>hisQ</b> | gi 49175990 ref NC_000913.2 | - | 2423252 | 2423938 | 65.98762679 | 73.16494456 | 59.78531864 | 55.07496931 | 67.15921312 | 0.184708679  | 0.3676459   | 0.145076  |
| <b>hisJ</b> | gi 49175990 ref NC_000913.2 | - | 2424028 | 2424810 | 237.7269713 | 247.9146041 | 171.1826898 | 171.544094  | 171.6333679 | 0.496280932  | 1.560041972 | 0.8723338 |
| <b>argT</b> | gi 49175990 ref NC_000913.2 | - | 2425031 | 2425813 | 121.0595252 | 155.8650208 | 87.95160007 | 104.1314267 | 95.36654704 | 0.492600256  | 1.574841471 | 0.8819071 |
| <b>ubiX</b> | gi 49175990 ref NC_000913.2 | - | 2426079 | 2426648 | 235.0985694 | 253.6281223 | 211.5220659 | 272.1294028 | 223.3412201 | 0.034669481  | 0.087153674 | 0.0222447 |
| <b>purF</b> | gi 49175990 ref NC_000913.2 | - | 2426743 | 2428260 | 663.8971329 | 642.0532029 | 1249.632253 | 1316.637238 | 467.7229594 | -0.608263572 | 1.391973913 | 0.7554754 |
| <b>cvpA</b> | gi 49175990 ref NC_000913.2 | - | 2428297 | 2428785 | 847.3476534 | 1038.237161 | 1467.673061 | 1734.634976 | 581.0292726 | -0.43627061  | 0.752457201 | 0.3417493 |
| <b>dedD</b> | gi 49175990 ref NC_000913.2 | - | 2429044 | 2429706 | 772.3802374 | 757.936736  | 896.4093235 | 796.1167241 | 801.0097293 | -0.11061637  | 0.235256016 | 0.0836772 |
| <b>folC</b> | gi 49175990 ref NC_000913.2 | - | 2429696 | 2430964 | 809.7252051 | 768.369037  | 911.8314595 | 703.2030305 | 747.1989009 | 0.022627733  | 0.007096313 | 0         |

|      |                             |   |         |         |             |             |             |             |             |               |             |           |
|------|-----------------------------|---|---------|---------|-------------|-------------|-------------|-------------|-------------|---------------|-------------|-----------|
| accD | gi 49175990 ref NC_000913.2 | - | 2431034 | 2431948 | 3526.629052 | 3536.146213 | 2982.60879  | 2930.760644 | 3190.100595 | 0.217079      | 0.505959459 | 0.215207  |
| dedA | gi 49175990 ref NC_000913.2 | - | 2432104 | 2432763 | 520.5092886 | 526.1964701 | 569.0027521 | 579.5288077 | 506.0918242 | -0.074719567  | 0.131486146 | 0.0394194 |
| truA | gi 49175990 ref NC_000913.2 | - | 2432846 | 2433658 | 655.7754803 | 619.2465942 | 797.3508178 | 849.6732173 | 730.4335686 | -0.305300833  | 0.843054419 | 0.3956627 |
| usg  | gi 49175990 ref NC_000913.2 | - | 2433658 | 2434671 | 906.4903585 | 807.2818876 | 886.9856282 | 790.459745  | 740.5354271 | 0.112469224   | 0.171769756 | 0.0540684 |
| pdxB | gi 49175990 ref NC_000913.2 | - | 2434737 | 2435873 | 1489.578549 | 1571.009995 | 1500.468419 | 1436.264638 | 1505.338624 | 0.040945241   | 0.083890881 | 0.021045  |
| flk  | gi 49175990 ref NC_000913.2 | + | 2435972 | 2436967 | 521.3261677 | 498.626645  | 423.8278408 | 488.7466233 | 500.1668336 | 0.113745737   | 0.230257443 | 0.0812973 |
| yfcJ | gi 49175990 ref NC_000913.2 | - | 2436964 | 2438142 | 230.176471  | 238.4134911 | 187.3606598 | 174.0152079 | 230.7457093 | 0.239111926   | 0.533243526 | 0.2291084 |
| fabB | gi 49175990 ref NC_000913.2 | - | 2438407 | 2439627 | 4486.374745 | 4508.754546 | 5482.246149 | 4556.397255 | 3971.291441 | -0.041347252  | 0.083651867 | 0.021045  |
| mnmC | gi 49175990 ref NC_000913.2 | + | 2439786 | 2441792 | 546.0347891 | 507.161607  | 470.6023704 | 408.2600334 | 440.8465263 | 0.275160488   | 0.661997347 | 0.2976012 |
| yfcL | gi 49175990 ref NC_000913.2 | - | 2441913 | 2442191 | 351.7311847 | 390.4154026 | 266.1013973 | 308.3163512 | 346.3519814 | 0.249547898   | 0.667995192 | 0.2992543 |
| yfcM | gi 49175990 ref NC_000913.2 | - | 2442225 | 2442773 | 525.1497359 | 496.7219698 | 456.0012227 | 369.1461482 | 451.9333899 | 0.276533981   | 0.652693943 | 0.2919779 |
| yfcA | gi 49175990 ref NC_000913.2 | - | 2442773 | 2443582 | 506.0312266 | 506.2456288 | 461.7014776 | 413.9248693 | 503.457598  | 0.139220591   | 0.289456201 | 0.1110664 |
| mepA | gi 49175990 ref NC_000913.2 | - | 2443582 | 2444406 | 378.0310621 | 367.5603864 | 347.2465314 | 300.6348741 | 328.6572335 | 0.204614933   | 0.439459277 | 0.1801805 |
| aroC | gi 49175990 ref NC_000913.2 | - | 2444410 | 2445495 | 943.5123656 | 891.842599  | 859.4580482 | 774.8463224 | 828.9497214 | 0.172090916   | 0.354871399 | 0.1411458 |
| prmB | gi 49175990 ref NC_000913.2 | - | 2445530 | 2446462 | 1391.63358  | 1528.287982 | 1271.039744 | 1083.368187 | 1465.760479 | 0.183665761   | 0.426735111 | 0.1747555 |
| smrB | gi 49175990 ref NC_000913.2 | + | 2446628 | 2447179 | 582.3847703 | 582.2302552 | 726.8076514 | 723.0621715 | 639.5792271 | -0.254838961  | 0.629135859 | 0.2816725 |
| yfcO | gi 49175990 ref NC_000913.2 | - | 2447250 | 2448071 | 897.2222524 | 1090.473071 | 1324.33131  | 1314.09497  | 1491.721135 | -0.501006816  | 1.460510049 | 0.7982741 |
| yfcP | gi 49175990 ref NC_000913.2 | - | 2448073 | 2448612 | 17.5465738  | 19.00512908 | 7.182857048 | 14.47838879 | 14.48526993 | 0.571018488   | 0.788056134 | 0.3620573 |
| yfcQ | gi 49175990 ref NC_000913.2 | - | 2448609 | 2449097 | 22.14713007 | 11.29936631 | 11.99511945 | 11.26379052 | 13.41644732 | 0.509949186   | 0.537460266 | 0.2313891 |
| yfcR | gi 49175990 ref NC_000913.2 | - | 2449094 | 2449606 | 12.07617649 | 10.42636026 | 11.17327796 | 15.73682958 | 22.19460824 | -0.537642467  | 0.66634704  | 0.2984769 |
| yfcS | gi 49175990 ref NC_000913.2 | - | 2449606 | 2450358 | 11.24910901 | 12.35453491 | 14.65769057 | 14.60101631 | 15.68408446 | -0.347219898  | 0.377010652 | 0.1485519 |
| yfcV | gi 49175990 ref NC_000913.2 | - | 2453105 | 2453668 | 13.51378961 | 9.45293239  | 19.79718406 | 15.81254736 | 20.13671295 | -0.652109353  | 1.041957842 | 0.5210803 |
| sixA | gi 49175990 ref NC_000913.2 | - | 2454349 | 2454834 | 501.3714487 | 539.5226609 | 556.1501832 | 664.5113782 | 514.0062298 | -0.165024897  | 0.307430482 | 0.188375  |
| fadJ | gi 49175990 ref NC_000913.2 | - | 2455037 | 2457181 | 646.9424601 | 610.6981519 | 1605.761639 | 1393.603869 | 1202.82672  | -1.135816535  | 6.255376679 | 4.8273059 |
| fadI | gi 49175990 ref NC_000913.2 | - | 2457181 | 2458491 | 489.3978404 | 434.0057816 | 1093.790451 | 931.7734338 | 889.7346188 | -1.047059979  | 5.813488426 | 4.4314607 |
| yfcZ | gi 49175990 ref NC_000913.2 | - | 2458672 | 2458956 | 2559.965222 | 2544.538531 | 3434.821087 | 3048.629504 | 3671.244397 | -0.405263739  | 1.156259986 | 0.5921291 |
| fadL | gi 49175990 ref NC_000913.2 | + | 2459328 | 2460668 | 1031.72336  | 1216.783832 | 923.9387472 | 944.1594998 | 1160.65536  | 0.124999061   | 0.31854404  | 0.1240538 |
| yfdF | gi 49175990 ref NC_000913.2 | + | 2461034 | 2462092 | 12.65191718 | 21.9318355  | 9.006408008 | 26.69341456 | 26.70602246 | -0.349681837  | 0.262350309 | 0.0969652 |
| miaA | gi 49175990 ref NC_000913.2 | - | 2462274 | 2463029 | 1517.43904  | 1556.749505 | 1166.155874 | 1125.696057 | 1172.187319 | 0.409814115   | 1.262130089 | 0.6675754 |
| yfdC | gi 49175990 ref NC_000913.2 | + | 2463323 | 2464255 | 140.477459  | 151.0445213 | 148.5072323 | 152.3931653 | 134.7501362 | -0.002155152  | 0.007059348 | 0         |
| intS | gi 49175990 ref NC_000913.2 | + | 2464567 | 2465724 | 203.8929883 | 196.5916573 | 94.15470243 | 117.8978904 | 177.669992  | 0.609755849   | 1.76797093  | 1.0317712 |
| gtrA | gi 49175990 ref NC_000913.2 | + | 2465877 | 2466239 | 510.8928764 | 540.4645869 | 391.7089232 | 363.5142706 | 484.2173998 | 0.335766457   | 0.948140878 | 0.4620781 |
| gtrB | gi 49175990 ref NC_000913.2 | + | 2466236 | 2467156 | 393.6395564 | 402.726228  | 198.2697107 | 406.3235248 | 329.6789402 | 0.324466084   | 0.791480983 | 0.3636958 |
| gtrS | gi 49175990 ref NC_000913.2 | + | 2467153 | 2468484 | 123.9005927 | 152.9995388 | 87.59216098 | 167.5366326 | 117.8886724 | 0.105786083   | 0.255117572 | 0.0928474 |
| yfdK | gi 49175990 ref NC_000913.2 | + | 2469099 | 2469539 | 47.94419723 | 47.48348777 | 45.46410974 | 51.55048648 | 53.76218782 | -0.07858884   | 0.099668097 | 0.0263121 |
| yfdP | gi 49175990 ref NC_000913.2 | + | 2471626 | 2471988 | 10.03455665 | 10.44778144 | 9.566997448 | 11.2465432  | 14.46782177 | -0.206213948  | 0.144779159 | 0.0432598 |
| yfdQ | gi 49175990 ref NC_000913.2 | + | 2472054 | 2472878 | 11.17903394 | 13.31509575 | 6.794720567 | 7.859212864 | 8.931663118 | 0.615916715   | 0.713112868 | 0.3184473 |
| yfdR | gi 49175990 ref NC_000913.2 | + | 2473006 | 2473542 | 9.961229585 | 11.40871066 | 10.3723187  | 6.806368871 | 7.882405635 | 0.355341951   | 0.33800763  | 0.1334396 |
| yfdS | gi 49175990 ref NC_000913.2 | + | 2473533 | 2473895 | 12.31619178 | 7.54540306  | 8.063226763 | 8.965222414 | 8.969706128 | 0.2369991     | 0.122715769 | 0.0362877 |
| yfdT | gi 49175990 ref NC_000913.2 | + | 2473895 | 2474200 | 27.07651796 | 27.54373064 | 22.12293012 | 39.05876361 | 37.99284743 | -0.294546658  | 0.387329185 | 0.1543669 |
| torI | gi 49175990 ref NC_000913.2 | + | 2474332 | 2474532 | 376.7655395 | 445.5339406 | 599.9151762 | 876.584149  | 978.8282329 | -1.036792099  | 4.322547777 | 3.1407682 |
| dsdC | gi 49175990 ref NC_000913.2 | - | 2474716 | 2475651 | 70.03956946 | 90.31566382 | 68.77665582 | 52.96017157 | 72.7394075  | 0.279531687   | 0.627743884 | 0.2809088 |
| dsdX | gi 49175990 ref NC_000913.2 | + | 2475869 | 2477206 | 438.1211269 | 493.952948  | 800.1471298 | 587.7520774 | 617.1325253 | -0.5211718035 | 1.597166536 | 0.896273  |
| dsdA | gi 49175990 ref NC_000913.2 | + | 2477224 | 2478552 | 1056.298071 | 1046.684001 | 2183.728656 | 1352.386117 | 1088.732229 | -0.518058458  | 1.432825995 | 0.7793247 |
| emrY | gi 49175990 ref NC_000913.2 | - | 2478660 | 2480198 | 20.57669529 | 14.18590549 | 19.83518033 | 19.06458523 | 17.99526313 | -0.085944762  | 0.083873324 | 0.021045  |
| emrK | gi 49175990 ref NC_000913.2 | - | 2480198 | 2481361 | 8.336309826 | 15.26830255 | 5.869343302 | 13.35197637 | 13.35826255 | 0.04314015    | 0.066551591 | 0.0157502 |
| evgA | gi 49175990 ref NC_000913.2 | + | 2481777 | 2482391 | 290.0026258 | 311.5656054 | 215.2800364 | 424.1496913 | 300.721903  | -0.092154252  | 0.081011087 | 0.0203997 |
| evgS | gi 49175990 ref NC_000913.2 | + | 2482396 | 2485989 | 440.8739824 | 463.5267461 | 375.7157139 | 669.8006031 | 516.0283599 | -0.230890717  | 0.390893918 | 0.1557279 |
| yfdE | gi 49175990 ref NC_000913.2 | - | 2486405 | 2487190 | 33.30262042 | 50.44848059 | 42.8364537  | 47.12025771 | 53.69590219 | -0.244757715  | 0.285582489 | 0.1086502 |
| yfdV | gi 49175990 ref NC_000913.2 | - | 2487264 | 2488208 | 9.627680493 | 16.21219484 | 5.899207809 | 16.57537265 | 11.23404968 | 0.129344234   | 0.14055743  | 0.0419272 |
| oxc  | gi 49175990 ref NC_000913.2 | - | 2488278 | 2489972 | 32.19376678 | 31.33309476 | 35.82201307 | 29.34470469 | 41.326829   | -0.155113011  | 0.201180591 | 0.0670826 |
| frc  | gi 49175990 ref NC_000913.2 | - | 2490026 | 2491276 | 26.00508357 | 35.20885426 | 14.16268921 | 27.90223059 | 30.07536318 | 0.292514476   | 0.526997926 | 0.2262827 |
| yfdX | gi 49175990 ref NC_000913.2 | - | 2491789 | 2492424 | 23.41539921 | 12.24810155 | 14.11464    | 33.26115168 | 22.48167478 | -0.346602589  | 0.455354611 | 0.1898325 |
| ypdI | gi 49175990 ref NC_000913.2 | + | 2492720 | 2492995 | 40.05249534 | 33.19332894 | 53.8961215  | 54.72291792 | 31.7981231  | -0.32320385   | 0.57956977  | 0.2545371 |
| yfdY | gi 49175990 ref NC_000913.2 | - | 2493072 | 2493314 | 180.5983721 | 170.9395767 | 398.5875687 | 295.9717183 | 185.8019692 | -0.705259861  | 2.125699971 | 1.2968225 |
| lpxP | gi 49175990 ref NC_000913.2 | + | 2493667 | 2494587 | 2090.106413 | 2324.236698 | 1981.687897 | 2730.6801   | 2211.045362 | -0.090665715  | 0.098642468 | 0.0262976 |
| ypdK | gi 49175990 ref NC_000913.2 | + | 2494943 | 2495014 | 141.6752115 | 155.8027188 | 84.88649954 | 136.5281528 | 135.49322   | 0.290004587   | 0.709268555 | 0.317627  |

|      |                             |   |         |         |             |             |             |             |             |              |             |           |
|------|-----------------------------|---|---------|---------|-------------|-------------|-------------|-------------|-------------|--------------|-------------|-----------|
| alaC | gi 49175990 ref NC_000913.2 | - | 2495079 | 2496317 | 594.0332124 | 545.1484623 | 513.38373   | 608.3351335 | 396.439203  | 0.183740199  | 0.341674588 | 0.1341942 |
| ypdA | gi 49175990 ref NC_000913.2 | + | 2496693 | 2498390 | 860.7336038 | 841.5183982 | 786.9214951 | 768.1005425 | 864.7022351 | 0.078972362  | 0.150357513 | 0.0458644 |
| ypdB | gi 49175990 ref NC_000913.2 | + | 2498405 | 2499139 | 525.0539023 | 510.9820758 | 480.2436711 | 469.795997  | 476.7417541 | 0.127897647  | 0.257096594 | 0.0940299 |
| ypdC | gi 49175990 ref NC_000913.2 | + | 2499152 | 2500009 | 259.2193994 | 266.9054908 | 295.95753   | 327.1907967 | 276.1195781 | -0.193081332 | 0.384396697 | 0.1532738 |
| fryA | gi 49175990 ref NC_000913.2 | - | 2500012 | 2502507 | 112.715931  | 95.86861858 | 117.9621973 | 108.8458489 | 116.6367541 | -0.111713048 | 0.235633494 | 0.0837523 |
| ypdE | gi 49175990 ref NC_000913.2 | - | 2502532 | 2503569 | 18.82996483 | 19.95161321 | 29.24384368 | 30.25736356 | 29.18782957 | -0.609933365 | 1.139692962 | 0.5824725 |
| ypdF | gi 49175990 ref NC_000913.2 | - | 2503569 | 2504654 | 35.18213929 | 25.57148536 | 41.14525786 | 37.1185922  | 44.76797065 | -0.397830964 | 0.805167489 | 0.3713443 |
| fryC | gi 49175990 ref NC_000913.2 | - | 2504669 | 2505916 | 25.74087701 | 27.55447586 | 38.36749895 | 41.34714727 | 30.48222123 | -0.4644542   | 0.796216112 | 0.3667143 |
| fryB | gi 49175990 ref NC_000913.2 | - | 2505938 | 2506264 | 5.410322176 | 8.581735411 | 15.89262951 | 15.6930763  | 14.62467493 | -1.16025762  | 1.833055927 | 1.0743999 |
| glk  | gi 49175990 ref NC_000913.2 | - | 2506483 | 2507448 | 2120.570567 | 1876.765728 | 5960.506533 | 4471.233125 | 3582.2316   | -1.185576828 | 5.817735184 | 4.4331301 |
| yfeO | gi 49175990 ref NC_000913.2 | + | 2507652 | 2508908 | 427.3148525 | 407.4436154 | 453.2990848 | 415.9744308 | 390.5230545 | 0.003902368  | 0.00824669  | 0         |
| ypeC | gi 49175990 ref NC_000913.2 | + | 2509023 | 2509349 | 272.8897391 | 245.952704  | 217.6272624 | 228.6286769 | 208.7400563 | 0.262670013  | 0.575795444 | 0.2518882 |
| mntH | gi 49175990 ref NC_000913.2 | - | 2509490 | 2510728 | 412.8128548 | 392.2451333 | 330.8479722 | 312.6248307 | 219.2198252 | 0.503331246  | 1.463575521 | 0.7989872 |
| nupC | gi 49175990 ref NC_000913.2 | + | 2511064 | 2512266 | 1566.547491 | 1658.394517 | 1161.888552 | 1175.311741 | 1826.552273 | 0.195648891  | 0.429793209 | 0.1762871 |
| insL | gi 49175990 ref NC_000913.2 | + | 2512353 | 2513465 | 947.4989857 | 1014.427158 | 780.6087065 | 729.0597337 | 1030.375896 | 0.196697825  | 0.463153894 | 0.1939831 |
| yfeA | gi 49175990 ref NC_000913.2 | - | 2513665 | 2515854 | 647.1112452 | 700.0438353 | 535.1146375 | 545.0045721 | 648.0897556 | 0.209107615  | 0.527613318 | 0.2262827 |
| yfeC | gi 49175990 ref NC_000913.2 | + | 2516489 | 2516833 | 592.1340609 | 656.3637833 | 814.6407065 | 1117.652322 | 1229.041111 | -0.787218478 | 2.843716761 | 1.8870149 |
| yfeD | gi 49175990 ref NC_000913.2 | + | 2516835 | 2517227 | 274.1001738 | 306.8346067 | 234.2177713 | 487.0746021 | 414.8470305 | -0.426483227 | 0.820861163 | 0.3800331 |
| gltX | gi 49175990 ref NC_000913.2 | - | 2517279 | 2518694 | 2837.436472 | 2958.679678 | 2163.063002 | 2150.553792 | 2717.590104 | 0.294268603  | 0.744402627 | 0.3364313 |
| xapR | gi 49175990 ref NC_000913.2 | - | 2519615 | 2520499 | 189.609708  | 208.9950999 | 199.1503946 | 206.2744937 | 205.2710025 | -0.044882752 | 0.038558248 | 0.0042561 |
| xapB | gi 49175990 ref NC_000913.2 | - | 2520751 | 2522007 | 111.8382475 | 104.4499709 | 131.5382726 | 132.3562127 | 144.5995619 | -0.32548604  | 0.817248249 | 0.3785126 |
| xapA | gi 49175990 ref NC_000913.2 | - | 2522067 | 2522900 | 9.75705043  | 5.650749758 | 4.091684585 | 3.43641093  | 6.635985085 | 0.739558812  | 0.649094356 | 0.2905748 |
| yfeN | gi 49175990 ref NC_000913.2 | + | 2523149 | 2523913 | 29.28689381 | 36.13866194 | 36.62186539 | 24.85621904 | 30.30321074 | 0.086314218  | 0.114553384 | 0.032275  |
| yfeR | gi 49175990 ref NC_000913.2 | - | 2523952 | 2524878 | 150.1676922 | 149.1133782 | 158.2702325 | 165.9902073 | 187.149702  | -0.191750007 | 0.354860837 | 0.1411458 |
| yfeH | gi 49175990 ref NC_000913.2 | + | 2524968 | 2525966 | 367.9144245 | 359.964691  | 431.0048526 | 403.6863269 | 413.9415622 | -0.187742892 | 0.419160359 | 0.1714563 |
| ypeB | gi 49175990 ref NC_000913.2 | - | 2525963 | 2526181 | 202.4952299 | 204.2087802 | 204.141     | 185.1125476 | 200.75894   | 0.050039588  | 0.079446645 | 0.0195158 |
| ligA | gi 49175990 ref NC_000913.2 | - | 2526183 | 2528198 | 1102.078257 | 988.698938  | 942.3933301 | 774.8413815 | 740.567976  | 0.37860562   | 0.95648032  | 0.4664353 |
| zipA | gi 49175990 ref NC_000913.2 | - | 2528269 | 2529255 | 3500.36936  | 3918.974281 | 3250.36943  | 3016.010822 | 3287.736355 | 0.205335829  | 0.505195589 | 0.2150742 |
| cysZ | gi 49175990 ref NC_000913.2 | + | 2529485 | 2530246 | 423.2237974 | 442.6284071 | 413.0948316 | 416.1104375 | 516.7912663 | -0.063602663 | 0.081231547 | 0.0204431 |
| cysK | gi 49175990 ref NC_000913.2 | + | 2530431 | 2531402 | 1429.107052 | 1462.717006 | 1715.299707 | 1718.652466 | 1567.210066 | -0.206382374 | 0.43409604  | 0.1772001 |
| ptsH | gi 49175990 ref NC_000913.2 | + | 2531786 | 2532043 | 5094.153411 | 5912.64712  | 5932.945189 | 4745.093539 | 6606.669741 | -0.085483084 | 0.102882456 | 0.0275018 |
| ptsI | gi 49175990 ref NC_000913.2 | + | 2532088 | 2533815 | 16029.11246 | 16938.96545 | 18648.41087 | 17812.84156 | 19127.74236 | -0.176294026 | 0.32145309  | 0.1253096 |
| crr  | gi 49175990 ref NC_000913.2 | + | 2533856 | 2534365 | 6509.895625 | 6732.277815 | 7376.523926 | 6833.526893 | 7625.444769 | -0.14037507  | 0.250378814 | 0.0911061 |
| pdxK | gi 49175990 ref NC_000913.2 | - | 2534408 | 2535259 | 525.4295449 | 551.8590362 | 596.1560979 | 468.8567676 | 492.5627403 | 0.057488948  | 0.093529854 | 0.024853  |
| yfeK | gi 49175990 ref NC_000913.2 | + | 2535364 | 2535738 | 126.4550395 | 113.9341379 | 70.31588211 | 148.2972288 | 85.52427987 | 0.237792739  | 0.431739047 | 0.1767011 |
| yfeS | gi 49175990 ref NC_000913.2 | + | 2535771 | 2536505 | 134.3259866 | 171.0594638 | 63.11865759 | 171.9407793 | 135.5718892 | 0.239430397  | 0.51009694  | 0.2187462 |
| cysM | gi 49175990 ref NC_000913.2 | - | 2536694 | 2537605 | 176.2954265 | 160.4762641 | 184.975272  | 104.6230868 | 103.5713262 | 0.402339304  | 0.768200012 | 0.3491773 |
| cysA | gi 49175990 ref NC_000913.2 | - | 2537739 | 2538836 | 74.39464755 | 97.92340422 | 99.60420223 | 110.8406251 | 93.24622424 | -0.266952394 | 0.447206647 | 0.1843451 |
| cysW | gi 49175990 ref NC_000913.2 | - | 2538826 | 2539701 | 52.96439208 | 53.18630772 | 54.94844373 | 37.20304659 | 41.59290794 | 0.26537417   | 0.447928651 | 0.1845628 |
| cysU | gi 49175990 ref NC_000913.2 | - | 2539701 | 2540534 | 38.74236585 | 21.72265336 | 40.14814733 | 22.65096495 | 25.92564452 | 0.109214199  | 0           | 0         |
| cysP | gi 49175990 ref NC_000913.2 | - | 2540534 | 2541550 | 57.02275313 | 50.29919149 | 64.09297844 | 41.7205188  | 47.21604953 | 0.10365633   | 0.103889759 | 0.0277229 |
| ucpA | gi 49175990 ref NC_000913.2 | - | 2541854 | 2542645 | 1845.43659  | 1845.43659  | 4280.760038 | 4033.814055 | 3421.587154 | -0.996317119 | 4.973502907 | 3.7078901 |
| murR | gi 49175990 ref NC_000913.2 | - | 2542774 | 2543631 | 65.84377092 | 58.84936283 | 70.74846561 | 79.59092441 | 85.12908206 | -0.324394279 | 0.715625342 | 0.3189698 |
| murQ | gi 49175990 ref NC_000913.2 | + | 2543795 | 2544691 | 211.0135023 | 191.8183978 | 348.3267632 | 280.5142102 | 312.9795225 | -0.619051577 | 2.23410163  | 1.3798801 |
| murP | gi 49175990 ref NC_000913.2 | + | 2544695 | 2546119 | 245.6619894 | 227.9188831 | 371.0343158 | 336.3921651 | 320.9593866 | -0.517154386 | 1.737276411 | 1.0087467 |
| yfeW | gi 49175990 ref NC_000913.2 | + | 2546124 | 2547428 | 200.888734  | 184.2237282 | 295.656308  | 276.9832756 | 279.3554513 | -0.545645293 | 1.821732354 | 1.0659315 |
| yfeX | gi 49175990 ref NC_000913.2 | - | 2547668 | 2548567 | 2780.986993 | 2634.74758  | 4764.693593 | 3865.883199 | 3873.521976 | -0.603176508 | 2.153303252 | 1.3193632 |
| yfeY | gi 49175990 ref NC_000913.2 | - | 2548663 | 2549238 | 641.2706539 | 604.0485022 | 453.8401897 | 671.3183633 | 681.7261174 | 0.03777885   | 0.080734266 | 0.0203997 |
| yfeZ | gi 49175990 ref NC_000913.2 | - | 2549299 | 2549748 | 311.6079288 | 262.0697674 | 281.8572173 | 271.1336019 | 191.152013  | 0.243016227  | 0.424288008 | 0.1738296 |
| ypeA | gi 49175990 ref NC_000913.2 | - | 2549735 | 2550160 | 511.2091808 | 491.9807681 | 518.2062181 | 514.4211355 | 386.273769  | 0.094709521  | 0.156546689 | 0.0487535 |
| amiA | gi 49175990 ref NC_000913.2 | + | 2550374 | 2551243 | 637.4279601 | 736.1676302 | 428.0959555 | 546.9407081 | 537.1756496 | 0.414387856  | 1.349850376 | 0.7302748 |
| hemF | gi 49175990 ref NC_000913.2 | + | 2551247 | 2552146 | 484.9277755 | 436.8622086 | 337.2067757 | 359.8315793 | 349.9854137 | 0.413181797  | 1.205574492 | 0.6233323 |
| eutR | gi 49175990 ref NC_000913.2 | - | 2552152 | 2553204 | 154.3172183 | 168.1470942 | 136.9661323 | 156.8242366 | 142.5082821 | 0.133609721  | 0.277088729 | 0.1038347 |
| eutK | gi 49175990 ref NC_000913.2 | - | 2553250 | 2553750 | 62.84722028 | 69.36361681 | 88.01222759 | 89.8298201  | 114.130921  | -0.574893205 | 1.560440647 | 0.8723338 |
| eutL | gi 49175990 ref NC_000913.2 | - | 2553763 | 2554422 | 39.32964238 | 48.49369902 | 54.325148   | 52.70783136 | 51.64092508 | -0.28863794  | 0.482752962 | 0.2028463 |
| eutC | gi 49175990 ref NC_000913.2 | - | 2554432 | 2555319 | 76.98018736 | 57.84583464 | 87.69234524 | 96.3087937  | 85.34244461 | -0.380650409 | 0.982974009 | 0.4802696 |
| eutB | gi 49175990 ref NC_000913.2 | - | 2555340 | 2556701 | 1714.617793 | 1612.746926 | 1842.971064 | 2101.878522 | 1697.41663  | -0.169705658 | 0.34097108  | 0.1340055 |



|      |                             |   |         |         |             |             |             |             |             |              |             |           |
|------|-----------------------------|---|---------|---------|-------------|-------------|-------------|-------------|-------------|--------------|-------------|-----------|
| eutA | gi 49175990 ref NC_000913.2 | - | 2563503 | 2564906 | 48.56123299 | 48.43527637 | 54.37397896 | 57.10031347 | 49.47005492 | -0.143214877 | 0.211288915 | 0.0721266 |
| eutH | gi 49175990 ref NC_000913.2 | - | 2564903 | 2566129 | 47.59209103 | 56.08290132 | 54.44545356 | 60.40977097 | 49.49599418 | -0.097970139 | 0.10585326  | 0.0283572 |
| eutG | gi 49175990 ref NC_000913.2 | - | 2566346 | 2567533 | 20.43643086 | 16.10383915 | 25.81933115 | 15.82915787 | 15.83773242 | -0.026141384 | 0.04012783  | 0.0045376 |
| eutJ | gi 49175990 ref NC_000913.2 | - | 2567523 | 2568359 | 7.3103005   | 10.4794764  | 11.20080123 | 3.485533013 | 3.487792173 | 0.553158369  | 0.476639903 | 0.2007769 |
| eutE | gi 49175990 ref NC_000913.2 | - | 2568370 | 2569773 | 14.44380397 | 6.568088005 | 23.3886954  | 13.65100167 | 19.06132845 | -0.747513599 | 1.277519131 | 0.678799  |
| eutM | gi 49175990 ref NC_000913.2 | - | 2570179 | 2570472 | 34.69617691 | 22.70381426 | 25.42655923 | 29.10537929 | 28.0365504  | 0.099758223  | 0.057807618 | 0.0110921 |
| eutD | gi 49175990 ref NC_000913.2 | - | 2570511 | 2571527 | 20.30269746 | 18.02173311 | 34.25459714 | 38.98384699 | 20.52936944 | -0.684657416 | 1.386582318 | 0.7519716 |
| eutT | gi 49175990 ref NC_000913.2 | - | 2571524 | 2572327 | 16.63410527 | 22.84784579 | 9.771587556 | 18.85552008 | 13.49854189 | 0.443877341  | 0.620421129 | 0.2765031 |
| eutQ | gi 49175990 ref NC_000913.2 | - | 2572324 | 2573025 | 12.33450278 | 16.18115794 | 18.44262391 | 16.83314561 | 15.76382075 | -0.271133299 | 0.263571877 | 0.0969652 |
| eutP | gi 49175990 ref NC_000913.2 | - | 2573000 | 2573479 | 9.353529405 | 10.45534596 | 8.183048761 | 11.15873555 | 10.09400242 | 0.00055463   | 0           | 0         |
| maeB | gi 49175990 ref NC_000913.2 | - | 2574120 | 2576399 | 1341.930699 | 1180.551532 | 1892.49964  | 1334.325907 | 1068.458081 | -0.13961704  | 0.330596823 | 0.1302079 |
| talA | gi 49175990 ref NC_000913.2 | + | 2576688 | 2577638 | 1056.831425 | 1077.091318 | 995.6948178 | 915.9303931 | 772.066447  | 0.260240221  | 0.608296349 | 0.2691543 |
| tkbB | gi 49175990 ref NC_000913.2 | + | 2577658 | 2579661 | 1653.751753 | 1413.241642 | 1605.12106  | 1362.069763 | 901.4140288 | 0.291305254  | 0.514588472 | 0.2209121 |
| ypfG | gi 49175990 ref NC_000913.2 | - | 2579756 | 2580799 | 260.1171473 | 245.9731156 | 275.095366  | 252.1375802 | 184.4061014 | 0.112513929  | 0.156200621 | 0.0487535 |
| nudK | gi 49175990 ref NC_000913.2 | - | 2580925 | 2581500 | 291.7418773 | 269.7084216 | 347.4540526 | 337.4722066 | 326.501104  | -0.251005197 | 0.620894735 | 0.2767412 |
| aegA | gi 49175990 ref NC_000913.2 | - | 2581568 | 2583547 | 569.0778788 | 578.4386643 | 1074.260136 | 945.2726125 | 1001.73061  | -0.808647813 | 3.731972696 | 2.6339416 |
| narQ | gi 49175990 ref NC_000913.2 | + | 2583753 | 2585453 | 377.6919669 | 407.4993247 | 404.9071588 | 439.4074546 | 420.6657484 | -0.116460365 | 0.191207889 | 0.0618753 |
| acrD | gi 49175990 ref NC_000913.2 | + | 2585617 | 2588730 | 373.2236839 | 337.134122  | 383.2016822 | 337.6442336 | 381.3177188 | -0.031405624 | 0.078144191 | 0.0192386 |
| ypfM | gi 49175990 ref NC_000913.2 | - | 2588829 | 2588888 | 1023.635648 | 971.628662  | 1946.525232 | 2632.439678 | 3259.169416 | -1.401130599 | 6.877399239 | 5.3746948 |
| ypfB | gi 49175990 ref NC_000913.2 | + | 2589269 | 2589625 | 239.32213   | 224.1236401 | 225.8267524 | 223.235218  | 262.2772656 | -0.02758373  | 0.046696426 | 0.0074556 |
| dapE | gi 49175990 ref NC_000913.2 | + | 2589629 | 2590756 | 1073.955043 | 1067.581367 | 1210.969727 | 1161.4832   | 1063.575693 | -0.091813658 | 0.180791665 | 0.057591  |
| ypfN | gi 49175990 ref NC_000913.2 | + | 2590784 | 2590984 | 285.2061737 | 283.0363345 | 314.7904789 | 356.3942846 | 332.0587435 | -0.238217381 | 0.526789436 | 0.2262827 |
| ypfA | gi 49175990 ref NC_000913.2 | - | 2591094 | 2591792 | 499.062721  | 503.3999593 | 631.8748642 | 577.256903  | 418.8987596 | -0.103274717 | 0.203384873 | 0.0682219 |
| tmcH | gi 49175990 ref NC_000913.2 | - | 2591866 | 2593881 | 857.1974781 | 779.7471864 | 1068.014604 | 902.4702649 | 666.8427112 | -0.07312758  | 0.177971662 | 0.0563259 |
| ypfJ | gi 49175990 ref NC_000913.2 | - | 2593896 | 2594759 | 698.1492793 | 641.0793754 | 970.287967  | 786.8342063 | 396.8883207 | -0.061674041 | 0.140334852 | 0.0419027 |
| purC | gi 49175990 ref NC_000913.2 | - | 2594927 | 2595640 | 462.6481906 | 441.6372233 | 1013.85353  | 1208.756833 | 357.8556904 | -0.907618776 | 2.340575086 | 1.4710234 |
| bamC | gi 49175990 ref NC_000913.2 | - | 2595853 | 2596887 | 3341.28274  | 3196.090866 | 3203.80214  | 3012.573129 | 3013.035977 | 0.097087725  | 0.166332767 | 0.0525902 |
| dapA | gi 49175990 ref NC_000913.2 | - | 2596904 | 2597782 | 5428.432523 | 5498.462203 | 5907.628108 | 5418.59344  | 5604.209875 | -0.044953608 | 0.073352092 | 0.017532  |
| gcvR | gi 49175990 ref NC_000913.2 | + | 2597928 | 2598500 | 1423.176094 | 1566.281516 | 1003.626363 | 1078.622291 | 1258.291867 | 0.403377783  | 1.277545636 | 0.678799  |
| bcp  | gi 49175990 ref NC_000913.2 | + | 2598500 | 2598970 | 1504.216274 | 1838.928904 | 876.4562047 | 1002.331111 | 1151.704353 | 0.687359694  | 2.935121399 | 1.9626967 |
| hyfA | gi 49175990 ref NC_000913.2 | + | 2599223 | 2599840 | 12.07617649 | 10.42636026 | 7.434545479 | 75.70422861 | 23.22481815 | -0.467671673 | 0.481036106 | 0.2024127 |
| hyfB | gi 49175990 ref NC_000913.2 | + | 2599840 | 2601858 | 67.6770742  | 60.75894277 | 53.6729268  | 65.00317317 | 71.61298025 | -0.003550661 | 0           | 0         |
| hyfC | gi 49175990 ref NC_000913.2 | + | 2601869 | 2602816 | 9.161871468 | 4.697087733 | 7.839832401 | 4.592705677 | 7.806429955 | 0.103008294  | 0           | 0         |
| hyfD | gi 49175990 ref NC_000913.2 | + | 2602833 | 2604272 | 18.03681517 | 21.8757557  | 29.96464536 | 25.73804921 | 17.0802897  | -0.285053939 | 0.293632808 | 0.113293  |
| hyfE | gi 49175990 ref NC_000913.2 | + | 2604284 | 2604934 | 13.3595298  | 11.3732187  | 18.73774497 | 24.49718931 | 16.95511212 | -0.67987392  | 1.101379248 | 0.5581634 |
| hyfF | gi 49175990 ref NC_000913.2 | + | 2604939 | 2606519 | 68.10790984 | 68.38339723 | 81.28393774 | 88.5709303  | 94.12226224 | -0.371062116 | 0.843347001 | 0.3956627 |
| hyfG | gi 49175990 ref NC_000913.2 | + | 2606509 | 2608176 | 125.5852232 | 123.4647564 | 202.3954682 | 183.8478785 | 157.3016541 | -0.52978661  | 1.583012589 | 0.8863821 |
| hyfH | gi 49175990 ref NC_000913.2 | + | 2608186 | 2608731 | 25.38567187 | 34.25730018 | 33.0660533  | 35.74670856 | 25.98782464 | -0.110812025 | 0.097945609 | 0.0262976 |
| hyfI | gi 49175990 ref NC_000913.2 | + | 2608728 | 2609486 | 38.27595951 | 29.37865289 | 56.70935102 | 57.04056075 | 40.65907194 | -0.569279877 | 1.352440974 | 0.7324211 |
| hyfJ | gi 49175990 ref NC_000913.2 | + | 2609479 | 2609892 | 9.210716633 | 12.37744358 | 8.021085681 | 8.946809301 | 7.881516754 | 0.355341951  | 0.338491965 | 0.1335511 |
| hyfR | gi 49175990 ref NC_000913.2 | + | 2609922 | 2611934 | 101.1721829 | 92.09409621 | 106.3705033 | 126.4589804 | 101.1237215 | -0.1948764   | 0.379120274 | 0.149598  |
| foxB | gi 49175990 ref NC_000913.2 | + | 2611956 | 2612804 | 116.9848219 | 105.3864824 | 157.1659719 | 147.8519425 | 105.850099  | -0.276805804 | 0.63225492  | 0.2835224 |
| yfgO | gi 49175990 ref NC_000913.2 | + | 2612842 | 2613903 | 441.2425217 | 415.0359782 | 518.1068344 | 473.0984202 | 406.3501396 | -0.104698726 | 0.226990187 | 0.0791779 |
| yfgC | gi 49175990 ref NC_000913.2 | + | 2614116 | 2615579 | 781.9708703 | 739.873374  | 759.0361329 | 837.3213937 | 728.1502454 | -0.01982502  | 0.039842072 | 0.0045376 |
| yfgD | gi 49175990 ref NC_000913.2 | + | 2615600 | 2615959 | 950.7570171 | 987.8181205 | 852.6487166 | 904.9809963 | 1234.477671 | -0.057716087 | 0.06168378  | 0.0127514 |
| hda  | gi 49175990 ref NC_000913.2 | - | 2616097 | 2616798 | 727.5913673 | 711.3942942 | 588.0193097 | 645.6750617 | 609.1305621 | 0.228066225  | 0.556885196 | 0.241437  |
| uraA | gi 49175990 ref NC_000913.2 | - | 2616893 | 2618182 | 262.6525968 | 202.1979488 | 178.2460089 | 182.8749806 | 222.9441457 | 0.284273459  | 0.551809461 | 0.2392178 |
| upp  | gi 49175990 ref NC_000913.2 | - | 2618268 | 2618894 | 843.5590602 | 1034.438293 | 473.2494243 | 510.3300735 | 701.6440809 | 0.699995975  | 2.961244278 | 1.9807395 |
| purM | gi 49175990 ref NC_000913.2 | + | 2619219 | 2620256 | 959.518329  | 1018.222118 | 2187.645696 | 2518.207157 | 635.0340129 | -0.83902924  | 1.748058877 | 1.0172403 |
| purN | gi 49175990 ref NC_000913.2 | + | 2620256 | 2620894 | 322.6746531 | 361.9254152 | 633.5315694 | 797.3365323 | 280.3170951 | -0.744192055 | 1.824784277 | 1.0673499 |
| ppk  | gi 49175990 ref NC_000913.2 | + | 2621066 | 2623132 | 1440.407469 | 1498.817788 | 1723.111599 | 1667.109252 | 1521.243577 | -0.157366619 | 0.303023643 | 0.1166828 |
| ppx  | gi 49175990 ref NC_000913.2 | + | 2623137 | 2624678 | 841.7421154 | 837.7274976 | 835.6416909 | 819.5296956 | 764.0287127 | 0.061944276  | 0.110487045 | 0.0302596 |
| yfgF | gi 49175990 ref NC_000913.2 | - | 2624717 | 2626960 | 161.9301946 | 173.8401352 | 164.8553584 | 159.388309  | 202.7398039 | -0.078750378 | 0.094270227 | 0.0250606 |
| yfgG | gi 49175990 ref NC_000913.2 | + | 2627312 | 2627503 | 1285.026964 | 1398.159189 | 1067.102847 | 1441.906733 | 2023.917065 | -0.206202442 | 0.294495695 | 0.113293  |
| yfgH | gi 49175990 ref NC_000913.2 | + | 2627814 | 2628332 | 20.91048869 | 18.97480458 | 11.08028539 | 12.45919502 | 22.13642316 | 0.384375306  | 0.45400884  | 0.1888796 |
| yfgI | gi 49175990 ref NC_000913.2 | + | 2628348 | 2628887 | 59.5763314  | 69.38063945 | 31.98768465 | 70.31292023 | 68.16073923 | 0.13640458   | 0.247774229 | 0.0904131 |
| guaA | gi 49175990 ref NC_000913.2 | - | 2628980 | 2630557 | 2526.100124 | 2367.845421 | 2476.158195 | 2387.825008 | 1682.000555 | 0.185138418  | 0.311978684 | 0.1218549 |

|             |                             |   |         |         |              |             |             |             |             |              |             |           |
|-------------|-----------------------------|---|---------|---------|--------------|-------------|-------------|-------------|-------------|--------------|-------------|-----------|
| <b>guaB</b> | gi 49175990 ref NC_000913.2 | - | 2630626 | 2632092 | 2513.523015  | 2327.947618 | 2479.471059 | 2055.009994 | 1482.397399 | 0.300842761  | 0.570781343 | 0.2491116 |
| <b>xseA</b> | gi 49175990 ref NC_000913.2 | + | 2632254 | 2633624 | 1533.263259  | 1551.043891 | 1186.657073 | 1207.646808 | 1511.727447 | 0.23575721   | 0.568820018 | 0.2488581 |
| <b>yfgJ</b> | gi 49175990 ref NC_000913.2 | - | 2633621 | 2633836 | 247.2784284  | 250.7520361 | 194.2196398 | 207.4848012 | 240.9297504 | 0.208684171  | 0.47367651  | 0.1990194 |
| <b>der</b>  | gi 49175990 ref NC_000913.2 | - | 2633906 | 2635378 | 1761.770153  | 1740.04495  | 1762.728868 | 1550.663684 | 1576.122338 | 0.111518099  | 0.193794684 | 0.0631676 |
| <b>bamB</b> | gi 49175990 ref NC_000913.2 | - | 2635496 | 2636674 | 3025.986982  | 2733.505287 | 3349.388492 | 3075.293424 | 2740.643322 | -0.063148621 | 0.147889759 | 0.0446157 |
| <b>yfgM</b> | gi 49175990 ref NC_000913.2 | - | 2636685 | 2637305 | 1856.80901   | 1644.062205 | 1958.953997 | 1803.897676 | 1571.82347  | 0.002574252  | 0.030579696 | 0.0022473 |
| <b>hisS</b> | gi 49175990 ref NC_000913.2 | - | 2637323 | 2638597 | 3820.837838  | 3661.499469 | 3765.221656 | 3719.977932 | 3727.538735 | 0.008126519  | 0.005485973 | 0         |
| <b>ispG</b> | gi 49175990 ref NC_000913.2 | - | 2638708 | 2639826 | 1761.039079  | 1789.448808 | 2163.968524 | 2217.597007 | 2168.338068 | -0.301448976 | 0.70225825  | 0.3141674 |
| <b>rodZ</b> | gi 49175990 ref NC_000913.2 | - | 2639853 | 2640866 | 3103.805772  | 3158.128247 | 3724.287685 | 3986.692567 | 3730.948638 | -0.289018632 | 0.690690369 | 0.3092004 |
| <b>rlmN</b> | gi 49175990 ref NC_000913.2 | - | 2641151 | 2642305 | 1352.887691  | 1333.524608 | 1007.579197 | 1075.263111 | 1253.81139  | 0.267103939  | 0.686560195 | 0.3077389 |
| <b>ndk</b>  | gi 49175990 ref NC_000913.2 | - | 2642455 | 2642886 | 309.5631788  | 332.4615177 | 214.5812294 | 273.4749589 | 295.8719534 | 0.273984691  | 0.712160347 | 0.3184473 |
| <b>pbpC</b> | gi 49175990 ref NC_000913.2 | - | 2643035 | 2645347 | 478.9210062  | 475.8485261 | 610.6618902 | 673.729062  | 659.5499685 | -0.444113809 | 1.328054006 | 0.7163989 |
| <b>yfhM</b> | gi 49175990 ref NC_000913.2 | - | 2645348 | 2650309 | 2431.913927  | 2388.763697 | 3377.303981 | 3344.200933 | 2591.59141  | -0.355613602 | 0.950892784 | 0.4631943 |
| <b>sseA</b> | gi 49175990 ref NC_000913.2 | + | 2650516 | 2651361 | 1417.141245  | 1440.868149 | 3148.557569 | 2769.163678 | 2139.614677 | -0.899196072 | 3.628727835 | 2.5490131 |
| <b>sseB</b> | gi 49175990 ref NC_000913.2 | - | 2652179 | 2652955 | 380.3466451  | 394.183718  | 352.4652714 | 308.4350525 | 316.3990037 | 0.250681224  | 0.601300324 | 0.2668653 |
| <b>pepB</b> | gi 49175990 ref NC_000913.2 | - | 2653097 | 2654380 | 1310.293001  | 1181.51283  | 1327.268241 | 1189.517441 | 1011.006234 | 0.108092538  | 0.155394734 | 0.0487535 |
| <b>iscX</b> | gi 49175990 ref NC_000913.2 | - | 2654558 | 2654758 | 509.5991671  | 544.26826   | 478.54737   | 399.3608082 | 460.9703467 | 0.235875501  | 0.584958664 | 0.2574398 |
| <b>fdx</b>  | gi 49175990 ref NC_000913.2 | - | 2654770 | 2655105 | 425.0612062  | 452.1342729 | 349.7779592 | 270.5286796 | 344.2309066 | 0.44594296   | 1.368389863 | 0.7411988 |
| <b>hscA</b> | gi 49175990 ref NC_000913.2 | - | 2655107 | 2656957 | 1706.488981  | 1571.895149 | 1406.860076 | 1168.381146 | 1158.917873 | 0.419019756  | 1.150049027 | 0.5889647 |
| <b>hscB</b> | gi 49175990 ref NC_000913.2 | - | 2656974 | 2657489 | 432.1984503  | 433.110881  | 371.0680053 | 306.3128456 | 356.6466942 | 0.333446916  | 0.873080973 | 0.4140035 |
| <b>iscA</b> | gi 49175990 ref NC_000913.2 | - | 2657585 | 2657908 | 818.9077568  | 702.7860489 | 770.2156042 | 682.8335398 | 639.5820656 | 0.154826642  | 0.255846473 | 0.0930901 |
| <b>iscU</b> | gi 49175990 ref NC_000913.2 | - | 2657925 | 2658311 | 892.5131449  | 816.7925554 | 742.6141354 | 717.4833275 | 637.3502999 | 0.30705217   | 0.78424961  | 0.3603755 |
| <b>iscS</b> | gi 49175990 ref NC_000913.2 | - | 2658339 | 2659553 | 2560.771781  | 2422.938966 | 1953.795396 | 1782.666321 | 1698.459012 | 0.473984605  | 1.376422034 | 0.7451446 |
| <b>iscR</b> | gi 49175990 ref NC_000913.2 | - | 2659665 | 2660153 | 1178.641358  | 1192.014896 | 757.1743904 | 766.6889196 | 603.8278593 | 0.74445411   | 3.164327447 | 2.1521082 |
| <b>trmJ</b> | gi 49175990 ref NC_000913.2 | - | 2660605 | 2661345 | 1516.595973  | 1653.65975  | 2229.751927 | 2100.996578 | 1871.279759 | -0.389509074 | 0.978998777 | 0.4786629 |
| <b>suhB</b> | gi 49175990 ref NC_000913.2 | + | 2661464 | 2662267 | 1602.05673   | 1937.704194 | 796.5316031 | 1200.669488 | 1473.316398 | 0.562038361  | 1.879050275 | 1.1101081 |
| <b>yfhR</b> | gi 49175990 ref NC_000913.2 | + | 2662412 | 2663266 | 114.6965425  | 119.6880524 | 66.30053053 | 92.00434927 | 127.3046244 | 0.273875564  | 0.595222096 | 0.2640613 |
| <b>csiE</b> | gi 49175990 ref NC_000913.2 | + | 2663457 | 2664737 | 850.8762998  | 932.7544895 | 1517.823208 | 1763.199385 | 1290.348989 | -0.786222952 | 3.058755535 | 2.0605644 |
| <b>hcaT</b> | gi 49175990 ref NC_000913.2 | - | 2664729 | 2665868 | 440.8876279  | 461.6252244 | 536.2511671 | 573.9718329 | 563.099634  | -0.314933087 | 0.803188527 | 0.3702416 |
| <b>hcaR</b> | gi 49175990 ref NC_000913.2 | - | 2666028 | 2666918 | 99.57186091  | 80.65752081 | 72.45496159 | 79.78096297 | 115.0558378 | 0.029917926  | 0.016484957 | 0         |
| <b>hcaE</b> | gi 49175990 ref NC_000913.2 | + | 2667054 | 2668415 | 163.0458041  | 148.1284836 | 189.98894   | 170.2640022 | 111.5774178 | 0.011747393  | 0.014235097 | 0         |
| <b>hcaF</b> | gi 49175990 ref NC_000913.2 | + | 2668412 | 2668930 | 27.85570345  | 25.62303249 | 21.55330175 | 27.92234595 | 24.69135253 | 0.116010054  | 0.136468864 | 0.0409694 |
| <b>hcaC</b> | gi 49175990 ref NC_000913.2 | + | 2668930 | 2669250 | 17.97882446  | 22.83457216 | 18.31997213 | 15.71020823 | 13.56292623 | 0.348074744  | 0.43190826  | 0.1767011 |
| <b>hcaB</b> | gi 49175990 ref NC_000913.2 | + | 2669247 | 2670059 | 25.86875594  | 38.08004471 | 33.82179241 | 20.39787551 | 25.83558865 | 0.234647203  | 0.350773867 | 0.1391697 |
| <b>hcaD</b> | gi 49175990 ref NC_000913.2 | + | 2670069 | 2671121 | 64.94162441  | 65.5355608  | 68.43938407 | 87.3907472  | 95.1362679  | -0.370741135 | 0.679949202 | 0.3498665 |
| <b>yphA</b> | gi 49175990 ref NC_000913.2 | + | 2671368 | 2671790 | 171.8909521  | 155.7255148 | 162.2229924 | 180.4396755 | 178.3146765 | -0.075698589 | 0.13749475  | 0.0414936 |
| <b>yphB</b> | gi 49175990 ref NC_000913.2 | - | 2671838 | 2672710 | 98.74723605  | 86.3819026  | 85.94182162 | 89.50769795 | 64.24544469 | 0.233870298  | 0.409684712 | 0.1671262 |
| <b>yphC</b> | gi 49175990 ref NC_000913.2 | - | 2672722 | 2673783 | 73.57468368  | 80.76117904 | 86.47899083 | 66.19690772 | 51.94549185 | 0.184087763  | 0.299076688 | 0.1150997 |
| <b>yphD</b> | gi 49175990 ref NC_000913.2 | - | 2673849 | 2674847 | 25.35738856  | 22.76996426 | 17.20635684 | 16.81701538 | 15.74826883 | 0.548996368  | 0.90034349  | 0.4325823 |
| <b>yphE</b> | gi 49175990 ref NC_000913.2 | - | 2674872 | 2676383 | 53.12391911  | 49.36476344 | 58.53309842 | 56.17046134 | 67.15825741 | -0.234940935 | 0.419467113 | 0.1714693 |
| <b>yphF</b> | gi 49175990 ref NC_000913.2 | - | 2676406 | 2677389 | 21.11181143  | 26.63692009 | 20.27443361 | 28.97078842 | 22.49874768 | -0.032432665 | 0           | 0         |
| <b>yphG</b> | gi 49175990 ref NC_000913.2 | - | 2677486 | 2680767 | 94.79823212  | 68.27492892 | 84.42760279 | 81.71854333 | 59.76671557 | 0.161825993  | 0.170978252 | 0.0538242 |
| <b>yphH</b> | gi 49175990 ref NC_000913.2 | + | 2680885 | 2682078 | 159.6545159  | 126.231094  | 134.516754  | 154.6639738 | 159.1747067 | -0.0409293   | 0.089277873 | 0.0235556 |
| <b>glyA</b> | gi 49175990 ref NC_000913.2 | - | 2682276 | 2683529 | 5226.114301  | 4959.887395 | 6572.188088 | 6867.865833 | 5043.740189 | -0.26195692  | 0.600681845 | 0.2668653 |
| <b>hmp</b>  | gi 49175990 ref NC_000913.2 | + | 2683857 | 2685047 | 386.7346906  | 322.8529557 | 373.3073987 | 305.0894611 | 297.4467763 | 0.161029055  | 0.242030258 | 0.0874402 |
| <b>glnB</b> | gi 49175990 ref NC_000913.2 | - | 2685092 | 2685430 | 433.5537693  | 512.020957  | 436.762202  | 437.3440622 | 493.3911575 | 0.026225725  | 0.094400619 | 0.0250659 |
| <b>glrR</b> | gi 49175990 ref NC_000913.2 | - | 2685491 | 2686825 | 348.021098   | 310.5344104 | 303.657495  | 261.460514  | 316.1774878 | 0.182838275  | 0.335056511 | 0.1322052 |
| <b>yfhG</b> | gi 49175990 ref NC_000913.2 | - | 2686815 | 2687528 | 293.6960424  | 324.8760465 | 271.5406013 | 234.457955  | 245.7086698 | 0.29602269   | 0.755168417 | 0.3439111 |
| <b>glrK</b> | gi 49175990 ref NC_000913.2 | - | 2687693 | 2689120 | 598.035889   | 620.2397674 | 635.6595605 | 604.4609797 | 709.8588335 | -0.100374838 | 0.170517742 | 0.0536727 |
| <b>purL</b> | gi 49175990 ref NC_000913.2 | - | 2689356 | 2689356 | 1062.9682831 | 951.6553957 | 3533.22365  | 3519.4809   | 620.583282  | -1.298828999 | 2.73302298  | 1.7998022 |
| <b>mitF</b> | gi 49175990 ref NC_000913.2 | + | 2693823 | 2695379 | 370.7213559  | 403.7042473 | 276.1908412 | 253.6237219 | 330.5964206 | 0.184497841  | 1.297596027 | 0.6927928 |
| <b>tadA</b> | gi 49175990 ref NC_000913.2 | - | 2695376 | 2695879 | 569.4559087  | 517.5996992 | 404.9646081 | 443.8930479 | 429.6169382 | 0.360604549  | 1.02500938  | 0.5123523 |
| <b>pgpC</b> | gi 49175990 ref NC_000913.2 | - | 2695937 | 2696572 | 715.2650432  | 642.0187801 | 708.6223774 | 784.6199296 | 677.6789258 | -0.078956995 | 0.169500489 | 0.0533084 |
| <b>yfhH</b> | gi 49175990 ref NC_000913.2 | + | 2696781 | 2697629 | 208.6516965  | 221.3267867 | 219.5308906 | 224.4221098 | 296.8454138 | -0.215589641 | 0.394015149 | 0.1571967 |
| <b>yfhL</b> | gi 49175990 ref NC_000913.2 | + | 2697685 | 2697945 | 183.0172286  | 179.5022276 | 99.6830788  | 180.0770864 | 159.1356083 | 0.289267242  | 0.636960102 | 0.284622  |
| <b>shoB</b> | gi 49175990 ref NC_000913.2 | - | 2698139 | 2698219 | 633.6516964  | 886.3298351 | 742.2418608 | 625.0020966 | 1097.39108  | -0.167640099 | 0.17903556  | 0.056825  |
| <b>acpS</b> | gi 49175990 ref NC_000913.2 | - | 2698640 | 2699020 | 230.2394007  | 233.6556986 | 269.2335013 | 272.3791496 | 249.1466589 | -0.184626899 | 0.375722926 | 0.1480057 |

|             |                             |   |         |         |             |             |             |             |             |              |             |           |
|-------------|-----------------------------|---|---------|---------|-------------|-------------|-------------|-------------|-------------|--------------|-------------|-----------|
| <b>pdxJ</b> | gi 49175990 ref NC_000913.2 | - | 2699020 | 2699751 | 979.5885242 | 897.5269466 | 1107.440587 | 996.80149   | 1016.353249 | -0.130877669 | 0.2976065   | 0.1148535 |
| <b>recO</b> | gi 49175990 ref NC_000913.2 | - | 2699763 | 2700491 | 514.3012341 | 504.3368716 | 441.1351109 | 483.2786075 | 562.8177658 | 0.033511145  | 0.068518217 | 0.0162313 |
| <b>era</b>  | gi 49175990 ref NC_000913.2 | - | 2700503 | 2701408 | 1414.086593 | 1397.163119 | 1043.008121 | 1051.690659 | 1127.238489 | 0.387770311  | 1.178137167 | 0.6080333 |
| <b>rnc</b>  | gi 49175990 ref NC_000913.2 | - | 2701405 | 2702085 | 1329.723599 | 1244.217694 | 1108.885729 | 1028.168338 | 1044.379084 | 0.292297949  | 0.730249418 | 0.3277    |
| <b>lepB</b> | gi 49175990 ref NC_000913.2 | - | 2702357 | 2703331 | 1395.054533 | 1422.823214 | 1348.255776 | 1260.418416 | 1627.285811 | -0.009378203 | 0.000582103 | 0         |
| <b>lepA</b> | gi 49175990 ref NC_000913.2 | - | 2703347 | 2705146 | 3076.794594 | 3025.138005 | 2905.311552 | 2575.46213  | 2916.419795 | 0.12975602   | 0.248478214 | 0.0906571 |
| <b>rseC</b> | gi 49175990 ref NC_000913.2 | - | 2705344 | 2705823 | 1626.133895 | 1592.820184 | 1714.147089 | 1746.706318 | 1675.929903 | -0.086222516 | 0.155134521 | 0.0487535 |
| <b>rseB</b> | gi 49175990 ref NC_000913.2 | - | 2705820 | 2706776 | 2447.050477 | 2408.710758 | 2697.21004  | 2951.740737 | 2383.946717 | -0.138417895 | 0.262206969 | 0.0969211 |
| <b>rseA</b> | gi 49175990 ref NC_000913.2 | - | 2706776 | 2707426 | 4525.967453 | 4758.577068 | 5293.836545 | 6415.892825 | 4646.571718 | -0.241556086 | 0.478957363 | 0.2015743 |
| <b>rpoE</b> | gi 49175990 ref NC_000913.2 | - | 2707459 | 2708034 | 6166.645126 | 6351.401311 | 7521.512201 | 8957.626222 | 7174.830622 | -0.341016389 | 0.790183232 | 0.3626835 |
| <b>nadB</b> | gi 49175990 ref NC_000913.2 | + | 2708442 | 2710064 | 268.8325815 | 264.0356524 | 324.305903  | 278.1080079 | 254.863486  | -0.088413893 | 0.171641556 | 0.0540684 |
| <b>yfiC</b> | gi 49175990 ref NC_000913.2 | - | 2710049 | 2710786 | 351.2364065 | 307.6770398 | 298.0549856 | 245.7484738 | 278.1677226 | 0.290614783  | 0.634942502 | 0.284622  |
| <b>srnB</b> | gi 49175990 ref NC_000913.2 | + | 2710918 | 2712252 | 1063.17753  | 1072.337315 | 769.8292025 | 841.9020424 | 819.9716136 | 0.39251368   | 1.195334906 | 0.6176362 |
| <b>yfiE</b> | gi 49175990 ref NC_000913.2 | - | 2712461 | 2713342 | 142.7905983 | 165.3219385 | 174.7565634 | 158.1379695 | 153.7848394 | -0.087990884 | 0.108859005 | 0.0294058 |
| <b>eamB</b> | gi 49175990 ref NC_000913.2 | + | 2713445 | 2714032 | 196.700922  | 206.1244459 | 256.5343869 | 270.2741226 | 311.6098921 | -0.484434752 | 1.371128208 | 0.7425793 |
| <b>yfiD</b> | gi 49175990 ref NC_000913.2 | - | 2714088 | 2714471 | 42661.05066 | 46721.28502 | 28654.2775  | 28656.56975 | 48369.2661  | 0.359412583  | 0.831960118 | 0.3881797 |
| <b>ung</b>  | gi 49175990 ref NC_000913.2 | + | 2714776 | 2715465 | 681.3041603 | 711.425006  | 899.3001201 | 814.0914543 | 880.5294044 | -0.315200887 | 0.838558102 | 0.3929965 |
| <b>yfiF</b> | gi 49175990 ref NC_000913.2 | - | 2715513 | 2716550 | 1914.088045 | 1763.757201 | 2412.607094 | 2073.10318  | 2008.080488 | -0.214551    | 0.495311047 | 0.2099578 |
| <b>trxC</b> | gi 49175990 ref NC_000913.2 | + | 2716757 | 2717176 | 400.3622936 | 437.8997263 | 330.5989689 | 290.7042621 | 410.142812  | 0.270449983  | 0.685451258 | 0.3075159 |
| <b>yfiP</b> | gi 49175990 ref NC_000913.2 | + | 2717245 | 2717943 | 182.9382043 | 184.2647322 | 148.2647322 | 158.355569  | 244.9942163 | -0.016734712 | 0           | 0         |
| <b>yfiQ</b> | gi 49175990 ref NC_000913.2 | + | 2717975 | 2720635 | 1852.514579 | 1892.980998 | 3805.148645 | 4178.314895 | 3576.265226 | -1.04496698  | 5.301117986 | 4.0008337 |
| <b>pssA</b> | gi 49175990 ref NC_000913.2 | + | 2720749 | 2722104 | 2679.221807 | 2665.164999 | 2760.745355 | 2719.870264 | 2555.427146 | -0.000339789 | 0.001382143 | 0         |
| <b>yfiM</b> | gi 49175990 ref NC_000913.2 | + | 2722150 | 2722473 | 2714.761246 | 3049.898081 | 3403.604422 | 3237.051451 | 4525.68314  | -0.39238264  | 0.926722884 | 0.4500279 |
| <b>kgfP</b> | gi 49175990 ref NC_000913.2 | - | 2722470 | 2723768 | 10913.67394 | 11234.38322 | 12755.41466 | 13137.6117  | 14073.15087 | -0.274161468 | 0.592475568 | 0.2622281 |
| <b>clpB</b> | gi 49175990 ref NC_000913.2 | - | 2729622 | 2732195 | 10462.68375 | 8619.444685 | 11827.23506 | 10201.85861 | 18662.4835  | -0.489676298 | 1.223559932 | 0.6385415 |
| <b>yfiH</b> | gi 49175990 ref NC_000913.2 | - | 2732325 | 2733056 | 686.1725223 | 627.7803788 | 628.6173763 | 602.0603094 | 572.1999587 | 0.14463939   | 0.263955949 | 0.0969652 |
| <b>rluD</b> | gi 49175990 ref NC_000913.2 | - | 2733053 | 2734033 | 1093.582346 | 1066.622567 | 1014.478115 | 926.1077382 | 878.4743913 | 0.210632347  | 0.458728613 | 0.1918802 |
| <b>bamD</b> | gi 49175990 ref NC_000913.2 | + | 2734168 | 2734905 | 1887.090151 | 3182.862491 | 2933.84791  | 3169.474153 | 3360.57071  | -0.075364585 | 0.092260353 | 0.0239252 |
| <b>raiA</b> | gi 49175990 ref NC_000913.2 | + | 2735176 | 2735517 | 17544.28165 | 17858.3648  | 37016.13371 | 70626.83225 | 53173.58872 | -1.625210819 | 7.890891067 | 6.2879707 |
| <b>pheL</b> | gi 49175990 ref NC_000913.2 | + | 2735621 | 2735668 | 112.2606058 | 89.19701906 | 137.9214563 | 187.2116913 | 227.2534052 | -0.858962219 | 3.009176172 | 2.0214758 |
| <b>pheA</b> | gi 49175990 ref NC_000913.2 | + | 2735767 | 2736927 | 891.6107919 | 882.3659924 | 739.5132546 | 810.6439823 | 880.3635637 | 0.13116088   | 0.286768325 | 0.1088606 |
| <b>tyrA</b> | gi 49175990 ref NC_000913.2 | - | 2736970 | 2738091 | 364.9559076 | 336.1929152 | 337.6536406 | 314.9562316 | 251.6133457 | 0.238236241  | 0.47966885  | 0.2015743 |
| <b>aroF</b> | gi 49175990 ref NC_000913.2 | - | 2738102 | 2739172 | 607.2602317 | 561.2984606 | 440.793006  | 482.018741  | 469.9899933 | 0.3389627    | 0.932749178 | 0.4530955 |
| <b>yfiL</b> | gi 49175990 ref NC_000913.2 | + | 2739382 | 2739747 | 75.1220478  | 73.12225446 | 65.62173154 | 98.22235328 | 66.39922832 | -0.055952102 | 0.057585463 | 0.0110921 |
| <b>yfiR</b> | gi 49175990 ref NC_000913.2 | + | 2739897 | 2740415 | 919.4816399 | 882.3515487 | 976.8251905 | 957.6310633 | 1164.073941 | -0.195375176 | 0.424458936 | 0.1738296 |
| <b>yfiN</b> | gi 49175990 ref NC_000913.2 | + | 2740405 | 2741631 | 438.0941553 | 411.2358388 | 442.4815385 | 479.9441822 | 575.1181235 | -0.232852597 | 0.531197544 | 0.2279226 |
| <b>yfiB</b> | gi 49175990 ref NC_000913.2 | + | 2741647 | 2742129 | 232.7721276 | 235.5541166 | 292.0062384 | 296.0015178 | 303.9533406 | -0.347102193 | 0.902638436 | 0.4341738 |
| <b>rplS</b> | gi 49175990 ref NC_000913.2 | - | 2742205 | 2742552 | 7860.342555 | 7897.682723 | 5391.846681 | 5094.623281 | 5728.563449 | 0.542853961  | 1.795495503 | 1.0500922 |
| <b>trmD</b> | gi 49175990 ref NC_000913.2 | - | 2742594 | 2743361 | 6649.263783 | 5905.868121 | 4753.904619 | 3854.623804 | 3584.222341 | 0.657583912  | 2.186977041 | 1.3412388 |
| <b>rimM</b> | gi 49175990 ref NC_000913.2 | - | 2743392 | 2743940 | 4399.475521 | 4205.740396 | 3432.528182 | 2880.283279 | 2532.086191 | 0.564670893  | 1.816895881 | 1.0618945 |
| <b>rpsP</b> | gi 49175990 ref NC_000913.2 | - | 2743959 | 2744207 | 4247.650119 | 4523.979882 | 2842.101047 | 2695.440523 | 3317.803224 | 0.559236128  | 2.007990595 | 1.2056112 |
| <b>ffh</b>  | gi 49175990 ref NC_000913.2 | - | 2744456 | 2745817 | 3436.672605 | 3189.427694 | 4059.145022 | 3845.43065  | 3142.322616 | -0.133694503 | 0.292667494 | 0.1130641 |
| <b>ypjD</b> | gi 49175990 ref NC_000913.2 | + | 2745984 | 2746775 | 472.732446  | 548.1056035 | 442.1086347 | 480.9050175 | 471.1085348 | 0.02892737   | 0.282986422 | 0.1073228 |
| <b>yfiD</b> | gi 49175990 ref NC_000913.2 | + | 2746796 | 2748082 | 774.2687457 | 760.7867818 | 605.9676306 | 549.4519082 | 556.4448275 | 0.434899106  | 1.374048144 | 0.7445406 |
| <b>grpE</b> | gi 49175990 ref NC_000913.2 | - | 2748137 | 2748730 | 3763.877207 | 3783.09843  | 1743.681347 | 1795.024699 | 1996.503536 | 1.027219521  | 5.404711026 | 4.0914618 |
| <b>nadK</b> | gi 49175990 ref NC_000913.2 | + | 2748853 | 2749731 | 623.9632763 | 636.378797  | 630.7079868 | 735.3228421 | 695.4584597 | -0.133869019 | 0.244705349 | 0.0891784 |
| <b>recN</b> | gi 49175990 ref NC_000913.2 | + | 2749817 | 2751478 | 1408.324822 | 1424.718939 | 691.8708793 | 729.9980972 | 895.9067968 | 0.864916839  | 4.182882035 | 3.0170124 |
| <b>bamE</b> | gi 49175990 ref NC_000913.2 | + | 2751627 | 2751968 | 2270.926084 | 2737.444547 | 1837.582548 | 2509.006383 | 2799.438264 | 0.027354368  | 0.119923931 | 0.0349247 |
| <b>ratB</b> | gi 49175990 ref NC_000913.2 | - | 2752030 | 2752320 | 213.0802833 | 225.124404  | 185.9252315 | 190.6156721 | 198.4871991 | 0.183529975  | 0.3972004   | 0.1592805 |
| <b>ratA</b> | gi 49175990 ref NC_000913.2 | - | 2752310 | 2752786 | 522.8208975 | 563.2685939 | 424.9675439 | 458.5445334 | 483.3438074 | 0.237726881  | 0.635075297 | 0.284622  |
| <b>smgB</b> | gi 49175990 ref NC_000913.2 | + | 2752918 | 2753400 | 1228.036676 | 1180.593111 | 1349.863225 | 1511.273148 | 1596.064101 | -0.304333767 | 0.751332334 | 0.3414472 |
| <b>intA</b> | gi 49175990 ref NC_000913.2 | + | 2754181 | 2755422 | 473.7581184 | 487.2620444 | 420.6386717 | 441.648155  | 408.3985265 | 0.177598237  | 0.404764285 | 0.1642513 |
| <b>yfiJ</b> | gi 49175990 ref NC_000913.2 | - | 2755666 | 2756622 | 54.92987391 | 71.31491834 | 51.40550963 | 77.19311001 | 78.32915526 | -0.174643701 | 0.181704465 | 0.0580788 |
| <b>alpA</b> | gi 49175990 ref NC_000913.2 | + | 2756666 | 2756878 | 11.65460477 | 7.551786895 | 5.807428936 | 11.17603917 | 13.31908501 | -0.055489971 | 0.004658046 | 0         |
| <b>yfiI</b> | gi 49175990 ref NC_000913.2 | + | 2757007 | 2758416 | 79.71413051 | 72.14844045 | 68.87841552 | 89.81326769 | 129.5258834 | -0.345791338 | 0.665391328 | 0.2980183 |
| <b>yfiJ</b> | gi 49175990 ref NC_000913.2 | + | 2758569 | 2759195 | 12.00108767 | 11.3868366  | 10.64279779 | 5.814175368 | 15.47619141 | 0.142057527  | 0.107462512 | 0.0288537 |
| <b>yfiK</b> | gi 49175990 ref NC_000913.2 | - | 2759373 | 2761562 | 566.3660073 | 608.858706  | 660.0482184 | 757.8495352 | 801.8593235 | -0.350837422 | 0.891151346 | 0.4261224 |

|      |                             |   |         |         |             |             |             |             |             |              |             |           |
|------|-----------------------------|---|---------|---------|-------------|-------------|-------------|-------------|-------------|--------------|-------------|-----------|
| yfjL | gi 49175990 ref NC_000913.2 | - | 2761559 | 2763175 | 575.9397494 | 599.3454446 | 664.048292  | 765.6964459 | 811.9481404 | -0.360602887 | 0.949870102 | 0.4629489 |
| yfjM | gi 49175990 ref NC_000913.2 | - | 2763535 | 2763798 | 50.66837382 | 32.17731571 | 49.27144675 | 47.20857566 | 58.16653121 | -0.268714656 | 0.555276056 | 0.2405783 |
| miIA | gi 49175990 ref NC_000913.2 | + | 2763940 | 2765013 | 3443.553648 | 3883.834864 | 2792.643664 | 3752.29053  | 3876.44605  | 0.04408321   | 0.135026241 | 0.0403231 |
| rniB | gi 49175990 ref NC_000913.2 | + | 2765006 | 2765377 | 692.5113932 | 756.0872091 | 612.3324121 | 813.5621554 | 652.9880223 | 0.042473022  | 0.115496326 | 0.0327284 |
| yfjP | gi 49175990 ref NC_000913.2 | + | 2765732 | 2766595 | 61.97552428 | 76.04782508 | 86.63361335 | 59.65186787 | 65.179361   | -0.039757402 | 0.022414646 | 0.0005477 |
| yfjQ | gi 49175990 ref NC_000913.2 | + | 2766687 | 2767508 | 50.9307223  | 39.82217822 | 43.07466515 | 53.7834428  | 59.27556286 | -0.180214704 | 0.315846578 | 0.1236733 |
| yfjR | gi 49175990 ref NC_000913.2 | + | 2767725 | 2768426 | 20.23815131 | 18.98062682 | 29.21243061 | 29.1603015  | 29.17517974 | -0.562755138 | 1.089734951 | 0.5531722 |
| ypjK | gi 49175990 ref NC_000913.2 | + | 2768467 | 2768703 | 7.457826829 | 8.556197883 | 7.577801813 | 4.507232939 | 2.361186894 | 0.739558812  | 0.53851273  | 0.2317944 |
| yfjS | gi 49175990 ref NC_000913.2 | + | 2768703 | 2769146 | 18.53821129 | 24.74538573 | 14.8050414  | 16.81563637 | 17.90033304 | 0.357168509  | 0.527172218 | 0.2262827 |
| yfjT | gi 49175990 ref NC_000913.2 | + | 2769170 | 2769637 | 50.11309075 | 58.93270328 | 45.57411145 | 52.69216479 | 58.1849128  | 0.038371431  | 0.070415562 | 0.0170551 |
| yfjW | gi 49175990 ref NC_000913.2 | + | 2771340 | 2773043 | 29.90538123 | 37.09034422 | 20.13984442 | 67.71418369 | 44.87396493 | -0.457422168 | 0.513233764 | 0.2205467 |
| yfjX | gi 49175990 ref NC_000913.2 | + | 2773941 | 2774399 | 22.56229841 | 24.70857662 | 43.30752148 | 28.2969493  | 40.29672669 | -0.654255469 | 1.410269411 | 0.7655567 |
| yfjY | gi 49175990 ref NC_000913.2 | + | 2774408 | 2774890 | 14.7294558  | 20.95049133 | 12.29012234 | 18.91275824 | 14.62274455 | 0.181067046  | 0.221676738 | 0.0773895 |
| ypjJ | gi 49175990 ref NC_000913.2 | + | 2774899 | 2775099 | 5.882388997 | 11.45872193 | 11.48764295 | 7.860957293 | 4.641260535 | 0.080520454  | 0.015055823 | 0         |
| yfjZ | gi 49175990 ref NC_000913.2 | + | 2775137 | 2775454 | 12.15364473 | 9.465922042 | 12.32364603 | 16.78236067 | 17.86555361 | -0.516162278 | 0.673409494 | 0.3015412 |
| ypjF | gi 49175990 ref NC_000913.2 | + | 2775475 | 2775804 | 21.51898876 | 19.92779635 | 13.05193328 | 9.067211058 | 11.2203231  | 0.912074746  | 1.57605706  | 0.8820699 |
| ypjA | gi 49175990 ref NC_000913.2 | - | 2776168 | 2780748 | 363.8364157 | 389.4491918 | 406.1579161 | 440.4986171 | 405.0193262 | -0.158926879 | 0.293118815 | 0.1132795 |
| csiD | gi 49175990 ref NC_000913.2 | + | 2787007 | 2787984 | 73.85023288 | 72.17380228 | 42.08105929 | 43.53571361 | 26.12729988 | 0.979990957  | 3.353183381 | 2.307935  |
| lhgO | gi 49175990 ref NC_000913.2 | + | 2788004 | 2789272 | 140.7638936 | 136.7573803 | 178.5668246 | 160.338933  | 143.7889531 | -0.201592481 | 0.417669736 | 0.1708749 |
| gabD | gi 49175990 ref NC_000913.2 | + | 2789295 | 2790743 | 226.5846949 | 220.3402938 | 374.4070113 | 303.9158308 | 268.4096174 | -0.480010128 | 1.441876405 | 0.7847544 |
| gabT | gi 49175990 ref NC_000913.2 | + | 2790757 | 2792037 | 195.896505  | 142.343399  | 339.8532802 | 284.769892  | 225.883871  | -0.689102378 | 2.524835897 | 1.6250389 |
| gabP | gi 49175990 ref NC_000913.2 | + | 2792275 | 2793675 | 67.62493826 | 63.61372693 | 117.4586957 | 88.80892972 | 103.2067408 | -0.634695879 | 2.036361665 | 1.2257878 |
| csiR | gi 49175990 ref NC_000913.2 | + | 2793696 | 2794358 | 267.6723986 | 254.5236943 | 291.5802592 | 301.4008763 | 233.6367109 | -0.066386184 | 0.124875851 | 0.0369374 |
| ygaU | gi 49175990 ref NC_000913.2 | - | 2794359 | 2794808 | 1392.717915 | 1343.012304 | 1486.041339 | 1966.883133 | 1066.294394 | -0.135085955 | 0.231731488 | 0.0820292 |
| yqaE | gi 49175990 ref NC_000913.2 | - | 2794892 | 2795050 | 1290.528    | 1478.918362 | 1959.27993  | 1778.251739 | 1857.610938 | -0.445278881 | 1.204813996 | 0.6233323 |
| ygaV | gi 49175990 ref NC_000913.2 | + | 2795233 | 2795532 | 88.49574447 | 105.4886245 | 77.99934002 | 94.31750859 | 134.0663198 | -0.112057506 | 0.093770437 | 0.024853  |
| ygaP | gi 49175990 ref NC_000913.2 | + | 2795542 | 2796066 | 121.8997001 | 145.3859897 | 107.06103   | 124.5656228 | 165.5569618 | -0.022356778 | 0.015302098 | 0         |
| stpA | gi 49175990 ref NC_000913.2 | + | 2796113 | 2796517 | 227.362899  | 244.0016791 | 77.93816478 | 58.9326759  | 163.7494584 | 1.279617575  | 4.71715788  | 3.4838204 |
| alaE | gi 49175990 ref NC_000913.2 | + | 2797186 | 2797635 | 267.0308731 | 311.602097  | 179.4015592 | 159.5091816 | 228.4246226 | 0.588426058  | 2.044775293 | 1.2321284 |
| ygaC | gi 49175990 ref NC_000913.2 | - | 2797672 | 2798016 | 174.2995685 | 164.2893622 | 110.5466984 | 135.4525863 | 116.732744  | 0.48743245   | 1.414267388 | 0.7686126 |
| nrdM | gi 49175990 ref NC_000913.2 | + | 2798156 | 2798497 | 1510.245756 | 1391.431127 | 4569.892911 | 2641.486104 | 925.5926134 | -0.83670198  | 1.711581084 | 0.9887211 |
| nrdH | gi 49175990 ref NC_000913.2 | + | 2798745 | 2798990 | 54.47910046 | 48.40220196 | 27.9914653  | 26.98985434 | 32.42651953 | 0.83046508   | 2.463211677 | 1.5720771 |
| nrdI | gi 49175990 ref NC_000913.2 | + | 2798987 | 2799397 | 89.63708923 | 67.33934675 | 40.01476101 | 40.4300005  | 46.99233656 | 0.915471743  | 3.10229966  | 2.0997306 |
| nrdE | gi 49175990 ref NC_000913.2 | + | 2799370 | 2801514 | 190.3777518 | 200.4274252 | 151.9363579 | 125.6891517 | 124.6479078 | 0.545582671  | 1.660940149 | 0.9513929 |
| nrdF | gi 49175990 ref NC_000913.2 | + | 2801524 | 2802483 | 59.36074713 | 59.86876655 | 35.57408187 | 34.69030474 | 27.09908686 | 0.794053425  | 2.410564037 | 1.5265613 |
| proV | gi 49175990 ref NC_000913.2 | + | 2802837 | 2804039 | 3574.425677 | 3748.925941 | 1760.405614 | 2362.055079 | 2392.428221 | 0.73214699   | 3.098028977 | 2.0966406 |
| proW | gi 49175990 ref NC_000913.2 | + | 2804032 | 2805096 | 3421.141067 | 3539.010807 | 2010.716026 | 2170.647379 | 2631.218873 | 0.602105603  | 2.130410866 | 1.3000929 |
| proX | gi 49175990 ref NC_000913.2 | + | 2805154 | 2806146 | 3540.777334 | 3295.808015 | 2456.290764 | 2575.361861 | 2982.423561 | 0.359797137  | 0.974349387 | 0.4751425 |
| ygaZ | gi 49175990 ref NC_000913.2 | + | 2807639 | 2808376 | 940.0579408 | 968.818028  | 1181.93196  | 1108.891229 | 1140.819737 | -0.262871381 | 0.633867681 | 0.2838932 |
| ygaH | gi 49175990 ref NC_000913.2 | + | 2808366 | 2808701 | 318.1922491 | 299.1595348 | 297.348315  | 327.228193  | 289.5212655 | 0.02549842   | 0.029594716 | 0.0017515 |
| mprA | gi 49175990 ref NC_000913.2 | + | 2808792 | 2809322 | 833.7363053 | 942.2671721 | 523.283869  | 558.4041963 | 643.6165113 | 0.602397954  | 2.465802204 | 1.5735583 |
| emrA | gi 49175990 ref NC_000913.2 | + | 2809449 | 2810621 | 670.5551924 | 704.7793685 | 454.5045891 | 498.9329725 | 553.9159427 | 0.439758971  | 1.424242038 | 0.7750308 |
| emrB | gi 49175990 ref NC_000913.2 | + | 2810638 | 2812176 | 541.4346322 | 530.9315611 | 464.216134  | 407.1948915 | 483.3222737 | 0.252679577  | 0.612414241 | 0.2710778 |
| luxS | gi 49175990 ref NC_000913.2 | - | 2812240 | 2812755 | 2584.770872 | 2907.426888 | 1754.253497 | 1735.674942 | 2039.071232 | 0.554536438  | 1.929819584 | 1.1485651 |
| gshA | gi 49175990 ref NC_000913.2 | - | 2812905 | 2814461 | 3403.393536 | 3600.759554 | 3046.49007  | 3105.650785 | 3458.127367 | 0.11662986   | 0.257108245 | 0.0940299 |
| yqaA | gi 49175990 ref NC_000913.2 | - | 2814534 | 2814962 | 1006.679451 | 933.6253928 | 929.6005115 | 846.521989  | 818.99548   | 0.181916235  | 0.355004243 | 0.1411458 |
| yqaB | gi 49175990 ref NC_000913.2 | - | 2814959 | 2815525 | 930.7285395 | 922.2586811 | 895.8346101 | 911.5628234 | 1004.918144 | -0.018981328 | 0.022970951 | 0.0005477 |
| csrA | gi 49175990 ref NC_000913.2 | - | 2816983 | 2817168 | 6145.895698 | 7422.867629 | 7279.640468 | 6703.476188 | 7457.194814 | -0.10116303  | 0.121329228 | 0.0355512 |
| alaS | gi 49175990 ref NC_000913.2 | - | 2817403 | 2820033 | 7447.397098 | 6770.20784  | 7957.057353 | 6842.475867 | 6862.895181 | -0.000792814 | 0.030746999 | 0.0022473 |
| recX | gi 49175990 ref NC_000913.2 | - | 2820161 | 2820661 | 205.2190257 | 193.7335311 | 112.8705035 | 104.4296527 | 126.5799563 | 0.805705126  | 3.199378166 | 2.1724452 |
| recA | gi 49175990 ref NC_000913.2 | - | 2820730 | 2821791 | 8420.653263 | 8505.564822 | 6018.039346 | 5964.516723 | 6056.235314 | 0.491731374  | 1.53891993  | 0.8575505 |
| ygaD | gi 49175990 ref NC_000913.2 | - | 2821871 | 2822368 | 238.314424  | 309.7499011 | 249.7275195 | 243.4492962 | 295.8859539 | 0.019586457  | 0.097893434 | 0.0262976 |
| mitB | gi 49175990 ref NC_000913.2 | - | 2822513 | 2823598 | 210.9083391 | 198.4812065 | 157.8291665 | 138.1153981 | 170.3297887 | 0.406512704  | 1.073716106 | 0.5397135 |
| srlA | gi 49175990 ref NC_000913.2 | + | 2823854 | 2824417 | 430.1551288 | 451.1551288 | 1649.114230 | 1420.121038 | 1201.650429 | -1.616038145 | 10.82313817 | 8.9840758 |
| srlE | gi 49175990 ref NC_000913.2 | + | 2824414 | 2825373 | 452.4066691 | 451.1550935 | 2118.278365 | 1578.676613 | 1245.673733 | -1.843659711 | 12.48949811 | 10.484145 |
| srlB | gi 49175990 ref NC_000913.2 | + | 2825384 | 2825755 | 211.3170395 | 173.7321005 | 830.3769409 | 655.9211258 | 519.8499664 | -1.751448506 | 12.10701949 | 10.178346 |
| srlD | gi 49175990 ref NC_000913.2 | + | 2825759 | 2826538 | 705.7587769 | 641.0744104 | 2707.479025 | 2089.878839 | 1628.179541 | -1.63493424  | 9.807800957 | 8.0174305 |

|      |                             |   |         |         |              |             |             |             |              |              |             |           |
|------|-----------------------------|---|---------|---------|--------------|-------------|-------------|-------------|--------------|--------------|-------------|-----------|
| gutM | gi 49175990 ref NC_000913.2 | + | 2826643 | 2827002 | 121.5818587  | 102.5131574 | 309.0668582 | 224.423264  | 208.9596982  | -1.102674435 | 5.040451882 | 3.768994  |
| srlR | gi 49175990 ref NC_000913.2 | + | 2827069 | 2827842 | 515.926924   | 548.0650275 | 850.1724061 | 812.8382694 | 774.1122191  | -0.615507069 | 2.319323618 | 1.4505608 |
| gutQ | gi 49175990 ref NC_000913.2 | + | 2827835 | 2828800 | 690.5190514  | 644.8863711 | 939.6387878 | 718.9009032 | 758.4331048  | -0.248432294 | 0.662831527 | 0.2976012 |
| norR | gi 49175990 ref NC_000913.2 | - | 2828797 | 2830311 | 344.5664273  | 337.1693282 | 158.5460841 | 147.2321719 | 238.3033425  | 0.904135802  | 3.766962581 | 2.6608389 |
| norV | gi 49175990 ref NC_000913.2 | + | 2830498 | 2831937 | 77.12350648  | 93.14341263 | 98.91761447 | 79.73992667 | 81.98502895  | -0.042859264 | 0.035809615 | 0.0036811 |
| norW | gi 49175990 ref NC_000913.2 | + | 2831934 | 2833067 | 52.70438958  | 59.87249892 | 65.5683215  | 48.3568255  | 48.38227947  | 0.056086887  | 0.080909485 | 0.0203997 |
| hypF | gi 49175990 ref NC_000913.2 | - | 2833195 | 2835447 | 388.541297   | 403.682995  | 571.5187142 | 458.8856628 | 595.4289596  | -0.453186755 | 1.384781602 | 0.7512172 |
| hydN | gi 49175990 ref NC_000913.2 | - | 2835600 | 2836127 | 28.25089847  | 30.40593515 | 38.5120159  | 47.93079667 | 29.43820644  | -0.402784027 | 0.665000175 | 0.2978756 |
| ascG | gi 49175990 ref NC_000913.2 | - | 2836276 | 2837286 | 151.5488505  | 144.347975  | 283.5869445 | 200.8478257 | 169.8147344  | -0.531137185 | 1.509295269 | 0.8318546 |
| ascF | gi 49175990 ref NC_000913.2 | + | 2837546 | 2839003 | 170.8319359  | 144.3009253 | 183.0353578 | 174.9649647 | 182.8250187  | -0.170877311 | 0.369788631 | 0.1454249 |
| ascB | gi 49175990 ref NC_000913.2 | + | 2839012 | 2840436 | 174.9474224  | 131.9111405 | 177.5267769 | 168.1831296 | 159.3968522  | -0.093709837 | 0.232366793 | 0.082297  |
| hycl | gi 49175990 ref NC_000913.2 | - | 2840595 | 2841065 | 109.8247469  | 107.3159154 | 147.1586037 | 150.1537184 | 132.5117174  | -0.394635573 | 1.067331549 | 0.5351483 |
| hycH | gi 49175990 ref NC_000913.2 | - | 2841058 | 2841468 | 68.31347498  | 62.65602629 | 73.95077422 | 72.77012199 | 56.33694583  | -0.030887721 | 0.050831565 | 0.0085479 |
| hycG | gi 49175990 ref NC_000913.2 | - | 2841465 | 2842232 | 46.75393047  | 44.62396765 | 51.81026113 | 48.32193322 | 57.09688679  | -0.192063949 | 0.316948731 | 0.1239013 |
| hycF | gi 49175990 ref NC_000913.2 | - | 2842232 | 2842774 | 16.52352815  | 24.76540763 | 23.59359207 | 15.87877104 | 22.37303284  | -0.028407468 | 0           | 0         |
| hycE | gi 49175990 ref NC_000913.2 | - | 2842784 | 2844493 | 32.8586466   | 31.32831051 | 52.26029932 | 46.94311068 | 26.22096137  | -0.359923292 | 0.601489224 | 0.2668653 |
| hycD | gi 49175990 ref NC_000913.2 | - | 2844511 | 2845434 | 17.87942474  | 14.20863847 | 18.36166421 | 14.64832628 | 15.73373411  | 0.012614198  | 0           | 0         |
| hycC | gi 49175990 ref NC_000913.2 | - | 2845437 | 2847263 | 28.21867847  | 19.87557759 | 32.83249105 | 33.48282067 | 20.47146417  | -0.222671417 | 0.306759551 | 0.1187544 |
| hycB | gi 49175990 ref NC_000913.2 | - | 2847260 | 2847871 | 2.905414657  | 5.730795441 | 6.984576684 | 12.22640856 | 10.09348445  | -1.221482241 | 1.363955063 | 0.738899  |
| hycA | gi 49175990 ref NC_000913.2 | - | 2847996 | 2848457 | 11.04507516  | 16.18430202 | 15.81059956 | 23.36267296 | -0.519881178 | 0.595397032  | 0.2640613   | 0         |
| hypA | gi 49175990 ref NC_000913.2 | + | 2848669 | 2849019 | 523.8925352  | 494.8217011 | 1635.476632 | 1385.967236 | 1590.548324  | -1.580471754 | 11.50376058 | 9.618122  |
| hypB | gi 49175990 ref NC_000913.2 | + | 2849023 | 2849895 | 1274.267109  | 1168.223227 | 3569.310112 | 3045.092817 | 2741.805409  | -1.328836028 | 7.575217298 | 6.0066956 |
| hypC | gi 49175990 ref NC_000913.2 | + | 2849886 | 2850158 | 324.3178814  | 322.9298629 | 1029.505018 | 807.3293462 | 693.6307963  | -1.36410989  | 8.083802734 | 6.4606601 |
| hypD | gi 49175990 ref NC_000913.2 | + | 2850158 | 2851279 | 1663.691541  | 1485.447682 | 4328.09263  | 3538.461451 | 3328.444081  | -1.216094734 | 6.891940923 | 5.3858302 |
| hypE | gi 49175990 ref NC_000913.2 | + | 2851276 | 2852286 | 1072.291126  | 998.214264  | 2957.550969 | 2415.064987 | 2235.896982  | -1.269391488 | 6.779734633 | 5.2936719 |
| fhIA | gi 49175990 ref NC_000913.2 | + | 2852360 | 2854438 | 666.7099115  | 592.6243442 | 1241.385851 | 1176.052547 | 1053.520324  | -0.85540765  | 3.926679921 | 2.7909818 |
| ygbA | gi 49175990 ref NC_000913.2 | - | 2854475 | 2854828 | 89.37377155  | 74.97193465 | 126.0547173 | 124.475223  | 126.7517524  | -0.591514337 | 1.979343349 | 1.1836765 |
| mutS | gi 49175990 ref NC_000913.2 | + | 2855115 | 2857676 | 777.9781283  | 781.693081  | 854.4798333 | 744.7463734 | 828.3208506  | -0.143139161 | 0.282668309 | 0.1073228 |
| pphB | gi 49175990 ref NC_000913.2 | + | 2857782 | 2858438 | 25.29809588  | 23.72808696 | 16.46489528 | 19.17318865 | 29.97656595  | 0.158333138  | 0.156694989 | 0.0487535 |
| ygbI | gi 49175990 ref NC_000913.2 | - | 2858489 | 2859256 | 272.0364792  | 263.0791795 | 325.9040096 | 336.0947351 | 237.1154289  | -0.152515304 | 0.305066514 | 0.117906  |
| ygbJ | gi 49175990 ref NC_000913.2 | + | 2859452 | 2860360 | 62.32567611  | 65.54860644 | 47.97894152 | 53.74709668 | 50.49532934  | 0.324514556  | 0.710781936 | 0.3183515 |
| ygbK | gi 49175990 ref NC_000913.2 | + | 2860357 | 2861523 | 139.5235851  | 168.1877662 | 113.0934424 | 102.296796  | 146.563485   | 0.321896264  | 0.854996819 | 0.4013286 |
| ygbL | gi 49175990 ref NC_000913.2 | + | 2861615 | 2862253 | 24.29855405  | 29.48120255 | 34.38359905 | 24.91630499 | 39.06012435  | -0.300791726 | 0.417248971 | 0.1708749 |
| ygbM | gi 49175990 ref NC_000913.2 | + | 2862258 | 2863034 | 51.46292069  | 57.96988515 | 57.25910749 | 58.35317752 | 64.95740498  | -0.153280825 | 0.202138117 | 0.0676043 |
| ygbN | gi 49175990 ref NC_000913.2 | + | 2863123 | 2864487 | 75.0000452   | 81.70631471 | 94.75558988 | 120.8758237 | 106.5896865  | -0.467061481 | 1.193907989 | 0.6174173 |
| rpoS | gi 49175990 ref NC_000913.2 | - | 2864581 | 2865573 | 3697.126225  | 3577.920773 | 3647.629868 | 3646.764187 | 2322.611007  | 0.197802458  | 0.354995694 | 0.1411458 |
| nlpD | gi 49175990 ref NC_000913.2 | - | 2865636 | 2866775 | 1658.844014  | 1672.618237 | 3126.161899 | 2269.2582   | 1570.022497  | -0.453099019 | 1.117926529 | 0.5675755 |
| pcm  | gi 49175990 ref NC_000913.2 | - | 2866915 | 2867541 | 707.3532965  | 700.9526151 | 835.2506256 | 817.1516491 | 626.3203712  | -0.10033374  | 0.203460948 | 0.0682219 |
| surE | gi 49175990 ref NC_000913.2 | - | 2867535 | 2868296 | 765.4691387  | 744.6353168 | 1020.829696 | 922.6743147 | 779.9272367  | -0.252246646 | 0.643647986 | 0.2873139 |
| truD | gi 49175990 ref NC_000913.2 | - | 2868277 | 2869326 | 758.8610016  | 805.4641937 | 928.1329355 | 849.8265978 | 759.6507639  | -0.113918428 | 0.217761319 | 0.075455  |
| ispF | gi 49175990 ref NC_000913.2 | - | 2869323 | 2869802 | 270.3728595  | 243.1023189 | 213.916155  | 254.2549474 | 209.9167396  | 0.194333396  | 0.376768433 | 0.1485105 |
| ispD | gi 49175990 ref NC_000913.2 | - | 2869802 | 2870512 | 683.8906797  | 583.1074847 | 555.5089314 | 553.7085504 | 448.9949447  | 0.314043498  | 0.708215429 | 0.3175779 |
| ftsB | gi 49175990 ref NC_000913.2 | - | 2870531 | 2870842 | 855.8422324  | 799.7056197 | 775.6284255 | 671.7050954 | 693.304935   | 0.23053993   | 0.519232958 | 0.2221304 |
| ygbE | gi 49175990 ref NC_000913.2 | - | 2871036 | 2871359 | 91.72715703  | 82.5932159  | 50.89088486 | 57.21020117 | 65.99835526  | 0.591700412  | 1.753624494 | 1.0202756 |
| cysC | gi 49175990 ref NC_000913.2 | - | 2871409 | 2872014 | 43.77300919  | 37.9512749  | 44.3456589  | 45.0423686  | 68.02404493  | -0.353196021 | 0.656554044 | 0.2943675 |
| cysN | gi 49175990 ref NC_000913.2 | - | 2872014 | 2873441 | 134.6576663  | 121.5327215 | 167.878932  | 162.4060637 | 117.0546242  | -0.196846867 | 0.407971464 | 0.1664204 |
| cysD | gi 49175990 ref NC_000913.2 | - | 2873443 | 2874351 | 26.3548823   | 28.50678241 | 30.55876733 | 40.04823858 | 21.60897457  | -0.170930228 | 0.165990051 | 0.0525902 |
| iap  | gi 49175990 ref NC_000913.2 | + | 2874603 | 2875640 | 168.2724114  | 178.5846363 | 142.8655019 | 178.2216683 | 199.3868461  | -0.020705077 | 0.000484137 | 0         |
| ygbF | gi 49175990 ref NC_000913.2 | - | 2876591 | 2876875 | 32.75663764  | 33.24245458 | 29.76557325 | 52.20719854 | 28.30475325  | -0.167206403 | 0.168131123 | 0.052933  |
| ygbT | gi 49175990 ref NC_000913.2 | - | 2877877 | 2877794 | 86.44192523  | 87.14078503 | 59.78887173 | 59.52886376 | 89.52886376  | 0.108123497  | 0.161412502 | 0.0503598 |
| casE | gi 49175990 ref NC_000913.2 | - | 2877810 | 2878409 | 67.04221104  | 61.70746945 | 64.29051421 | 82.81882219 | 78.46623572  | -0.222825761 | 0.411329133 | 0.1678377 |
| casD | gi 49175990 ref NC_000913.2 | - | 2878396 | 2879070 | 61.84552723  | 60.77820079 | 42.29579088 | 75.92739097 | 68.29844849  | -0.038042489 | 0           | 0         |
| casC | gi 49175990 ref NC_000913.2 | - | 2879073 | 2880164 | 59.33519253  | 57.92684061 | 30.42387406 | 52.6216073  | 64.65283151  | 0.23100428   | 0.407862012 | 0.1664204 |
| casB | gi 49175990 ref NC_000913.2 | - | 2880177 | 2880659 | 12.466809751 | 14.26085094 | 4.252743133 | 7.781177258 | 6.719282942  | 1.061789665  | 1.711687024 | 0.9887211 |
| casA | gi 49175990 ref NC_000913.2 | - | 2880652 | 2882160 | 30.80734703  | 46.64505691 | 33.09761738 | 34.67557783 | 28.17480497  | 0.232832558  | 0.441543137 | 0.180966  |
| ygcB | gi 49175990 ref NC_000913.2 | - | 2882575 | 2885241 | 157.8475949  | 150.9982068 | 196.7629627 | 250.7745806 | 188.6778785  | -0.456638141 | 1.226510166 | 0.6406707 |
| cysH | gi 49175990 ref NC_000913.2 | - | 2885600 | 2886334 | 30.86328532  | 31.34287704 | 22.73965642 | 25.74731063 | 24.67850315  | 0.346115997  | 0.548400158 | 0.2367121 |

|             |                             |   |         |         |             |             |             |             |             |              |              |           |
|-------------|-----------------------------|---|---------|---------|-------------|-------------|-------------|-------------|-------------|--------------|--------------|-----------|
| <b>cysl</b> | gi 49175990 ref NC_000913.2 | - | 2886409 | 2888121 | 63.19057973 | 59.816841   | 86.58303424 | 46.4393185  | 76.1432889  | -0.158272067 | 0.261168657  | 0.0963912 |
| <b>cysJ</b> | gi 49175990 ref NC_000913.2 | - | 2888121 | 2889920 | 61.65322885 | 49.3210087  | 66.41914097 | 74.95735871 | 60.72760532 | -0.254308714 | 0.542950598  | 0.2332111 |
| <b>queD</b> | gi 49175990 ref NC_000913.2 | + | 2890236 | 2890601 | 243.7134812 | 282.1537164 | 159.0243237 | 167.4038802 | 285.2202036 | 0.331023278  | 0.816700594  | 0.3785126 |
| <b>ycgN</b> | gi 49175990 ref NC_000913.2 | + | 2890679 | 2891950 | 271.2958965 | 271.6424661 | 420.1915484 | 410.2525322 | 347.9880854 | -0.527700289 | 1.771866954  | 1.0335255 |
| <b>ycgO</b> | gi 49175990 ref NC_000913.2 | + | 2891941 | 2892201 | 39.53661344 | 43.71373408 | 81.77894816 | 72.8832195  | 64.12750094 | -0.809952706 | 2.559874983  | 1.6497983 |
| <b>ycgP</b> | gi 49175990 ref NC_000913.2 | + | 2892218 | 2892793 | 45.54599153 | 58.00570683 | 87.90511882 | 101.9073332 | 94.24455477 | -0.901549134 | 3.178294769  | 2.1605571 |
| <b>ycgQ</b> | gi 49175990 ref NC_000913.2 | - | 2892941 | 2893801 | 29.99934829 | 35.1764509  | 43.10552789 | 27.14965534 | 34.78702408 | -0.105758426 | 0.109208688  | 0.0294058 |
| <b>ycgR</b> | gi 49175990 ref NC_000913.2 | - | 2893798 | 2894577 | 23.34840791 | 22.78630812 | 26.86828643 | 12.54499443 | 14.71689366 | 0.381037656  | 0.449998038  | 0.1860452 |
| <b>ycgS</b> | gi 49175990 ref NC_000913.2 | - | 2894555 | 2895892 | 16.98738315 | 28.59231872 | 14.8744607  | 21.14954547 | 15.77640998 | 0.340835583  | 0.540416507  | 0.2323307 |
| <b>ycgU</b> | gi 49175990 ref NC_000913.2 | - | 2895986 | 2897440 | 61.63777478 | 66.50659235 | 55.83221798 | 53.90218376 | 61.59507361 | 0.156134705  | 0.280502568  | 0.1059547 |
| <b>ycgW</b> | gi 49175990 ref NC_000913.2 | - | 2897510 | 2898295 | 2.981689483 | 4.767316574 | 5.742394549 | 8.999490317 | 13.27773564 | -1.297412559 | 1.389296323  | 0.7538936 |
| <b>ycqE</b> | gi 49175990 ref NC_000913.2 | + | 2898614 | 2899891 | 29.2481153  | 24.65527041 | 21.64241282 | 26.8835929  | 29.06122028 | 0.069256279  | 0.039704048  | 0.0045152 |
| <b>ycgE</b> | gi 49175990 ref NC_000913.2 | + | 2899918 | 2901396 | 36.68932777 | 34.17153473 | 33.62470383 | 50.12629012 | 33.82050022 | -0.144917036 | 0.159355906  | 0.049678  |
| <b>queE</b> | gi 49175990 ref NC_000913.2 | - | 2902769 | 2903440 | 488.0142469 | 542.3870638 | 543.0345031 | 449.6770273 | 414.1794367 | 0.132769501  | 0.273565166  | 0.1020023 |
| <b>ycgG</b> | gi 49175990 ref NC_000913.2 | + | 2903733 | 2904605 | 8.746698016 | 9.501862719 | 6.948591043 | 13.2724208  | 7.931573626 | -0.055445972 | 0            | 0         |
| <b>eno</b>  | gi 49175990 ref NC_000913.2 | - | 2904665 | 2905963 | 10717.88064 | 11615.28305 | 14172.05921 | 10771.03601 | 10292.20647 | -0.068315855 | 0.113432754  | 0.0319208 |
| <b>pyrG</b> | gi 49175990 ref NC_000913.2 | - | 2906051 | 2907688 | 5949.661983 | 5989.51188  | 6185.060617 | 5891.681382 | 6047.276127 | -0.016331825 | 0.023140638  | 0.0005477 |
| <b>mazG</b> | gi 49175990 ref NC_000913.2 | - | 2907916 | 2908707 | 556.0499028 | 529.0181205 | 793.2910939 | 699.4076057 | 438.1534793 | -0.221669807 | 0.483882657  | 0.2033661 |
| <b>mazF</b> | gi 49175990 ref NC_000913.2 | - | 2908778 | 2909113 | 283.8659774 | 288.7459631 | 365.7238402 | 361.9850821 | 285.2500281 | -0.233931689 | 0.519968997  | 0.2224743 |
| <b>mazE</b> | gi 49175990 ref NC_000913.2 | - | 2909113 | 2909361 | 292.6034679 | 306.8058744 | 364.4047793 | 373.1191384 | 272.978945  | -0.168767381 | 0.324951687  | 0.1265519 |
| <b>relA</b> | gi 49175990 ref NC_000913.2 | - | 2909439 | 2911673 | 1720.529609 | 1515.835391 | 2405.174738 | 1984.388559 | 1446.492324 | -0.229122119 | 0.525953841  | 0.2256696 |
| <b>rimC</b> | gi 49175990 ref NC_000913.2 | - | 2911721 | 2913022 | 920.9738076 | 827.2318274 | 1405.780929 | 1340.803957 | 1117.554732 | -0.536971722 | 1.915396951  | 1.1367122 |
| <b>barA</b> | gi 49175990 ref NC_000913.2 | + | 2913079 | 2915835 | 775.6193973 | 742.7283765 | 673.3744913 | 765.7452711 | 851.1427924 | -0.0108431   | 0.008526268  | 0         |
| <b>gudD</b> | gi 49175990 ref NC_000913.2 | - | 2916067 | 2917407 | 114.2084856 | 113.0193965 | 239.6643056 | 176.6347434 | 122.8498324 | -0.634123856 | 1.782649836  | 1.0409668 |
| <b>gudX</b> | gi 49175990 ref NC_000913.2 | - | 2917428 | 2918768 | 54.70899965 | 58.90639302 | 128.661944  | 92.06395846 | 77.7600371  | -0.795811027 | 2.545487377  | 1.6388695 |
| <b>gudP</b> | gi 49175990 ref NC_000913.2 | - | 2918770 | 2920122 | 35.12436046 | 38.96406369 | 139.1158241 | 77.52239837 | 42.23633161 | -1.188694213 | 3.022541174  | 2.0321357 |
| <b>ycqA</b> | gi 49175990 ref NC_000913.2 | - | 2920557 | 2921006 | 815.1808338 | 825.3880362 | 1255.284626 | 1000.201381 | 930.2047956 | -0.360045478 | 0.984838969  | 0.4817951 |
| <b>truC</b> | gi 49175990 ref NC_000913.2 | - | 2921024 | 2921806 | 198.2785656 | 187.0847621 | 180.3232378 | 161.2609448 | 184.9921142 | 0.143419288  | 0.254273377  | 0.0924466 |
| <b>ycqC</b> | gi 49175990 ref NC_000913.2 | - | 2921806 | 2922135 | 104.8469388 | 99.7077493  | 99.35390632 | 82.08145905 | 105.2799466 | 0.10715773   | 0.164492849  | 0.0519869 |
| <b>syd</b>  | gi 49175990 ref NC_000913.2 | - | 2922757 | 2923302 | 499.8805762 | 576.5977704 | 475.7134753 | 568.3280968 | 585.3818677 | -0.042556787 | 0.015492685  | 0         |
| <b>ycqF</b> | gi 49175990 ref NC_000913.2 | + | 2923370 | 2924218 | 552.7851921 | 543.280131  | 456.6904445 | 489.9002045 | 490.1565487 | 0.193487564  | 0.446990351  | 0.1843451 |
| <b>ycgH</b> | gi 49175990 ref NC_000913.2 | + | 2924330 | 2925694 | 3739.279831 | 3746.054178 | 9087.434782 | 9199.846916 | 6485.241581 | -1.134028774 | 5.282528881  | 3.9864817 |
| <b>sdaC</b> | gi 49175990 ref NC_000913.2 | + | 2926251 | 2927540 | 2720.629782 | 2895.052178 | 2360.337497 | 2085.625216 | 2714.279073 | 0.224594185  | 0.5152497    | 0.2209121 |
| <b>sdaB</b> | gi 49175990 ref NC_000913.2 | + | 2927598 | 2928965 | 915.0478197 | 882.3538125 | 749.6651392 | 669.5808976 | 844.402299  | 0.256957288  | 0.63217397   | 0.2835224 |
| <b>ycgD</b> | gi 49175990 ref NC_000913.2 | + | 2929077 | 2929887 | 336.6239779 | 303.8908903 | 454.939817  | 534.9398625 | 727.3919775 | -0.839067709 | 3.336574672  | 2.2936866 |
| <b>fucO</b> | gi 49175990 ref NC_000913.2 | - | 2929887 | 2931035 | 178.8629161 | 129.0455641 | 359.8254031 | 313.8581837 | 237.134894  | -0.923787689 | 3.918558091  | 2.7849363 |
| <b>fucA</b> | gi 49175990 ref NC_000913.2 | - | 2931063 | 2931710 | 46.50509206 | 50.35830097 | 153.9216903 | 124.4087908 | 85.75155062 | -1.313537028 | 5.594624989  | 4.2611724 |
| <b>fucP</b> | gi 49175990 ref NC_000913.2 | + | 2932257 | 2933573 | 109.5082845 | 94.92575324 | 227.2314885 | 318.4956988 | 446.8061109 | -1.698736643 | 8.733049423  | 7.0474143 |
| <b>fucI</b> | gi 49175990 ref NC_000913.2 | + | 2933606 | 2935381 | 183.517806  | 188.0685513 | 376.7014825 | 391.1619519 | 340.0626429 | -0.992323633 | 4.799251091  | 3.5548247 |
| <b>fucK</b> | gi 49175990 ref NC_000913.2 | + | 2935460 | 2936908 | 112.8927579 | 113.9766754 | 218.9919428 | 168.2740791 | 143.9392389 | -0.62600483  | 1.950466447  | 1.1616638 |
| <b>fucU</b> | gi 49175990 ref NC_000913.2 | + | 2936910 | 2937332 | 105.2482685 | 109.2377786 | 125.4144513 | 102.1583346 | 103.3165547 | -0.035381594 | 0.056942699  | 0.0108652 |
| <b>fucR</b> | gi 49175990 ref NC_000913.2 | + | 2937390 | 2938121 | 222.8832359 | 210.8306871 | 283.4025376 | 331.8596323 | 375.4960252 | -0.60948419  | 2.029804451  | 1.2212938 |
| <b>rimM</b> | gi 49175990 ref NC_000913.2 | - | 2938165 | 2939265 | 463.1632325 | 457.799744  | 401.9216605 | 399.1144655 | 383.703932  | 0.224626852  | 0.526779888  | 0.2262827 |
| <b>ycgD</b> | gi 49175990 ref NC_000913.2 | - | 2939258 | 2939653 | 95.93044472 | 73.04037899 | 98.22962687 | 75.1298002  | 53.15870564 | 0.214365776  | 0.245487582  | 0.0896554 |
| <b>gcvA</b> | gi 49175990 ref NC_000913.2 | - | 2939672 | 2940589 | 282.4157043 | 304.9190275 | 202.7648903 | 273.4199256 | 288.0244935 | 0.17981368   | 0.425418573  | 0.1743904 |
| <b>ycgI</b> | gi 49175990 ref NC_000913.2 | - | 2940940 | 2941167 | 1621.31442  | 1781.888243 | 1764.343795 | 4068.968502 | 3373.950138 | -0.897332693 | 2.495010365  | 1.5994257 |
| <b>csdA</b> | gi 49175990 ref NC_000913.2 | + | 2941359 | 2942564 | 1017.839401 | 999.1890074 | 863.9945186 | 943.9141244 | 905.2475044 | 0.156462407  | 0.3354997    | 0.1322937 |
| <b>csdE</b> | gi 49175990 ref NC_000913.2 | + | 2942564 | 2943007 | 459.9714318 | 459.7043931 | 371.5855586 | 377.8285703 | 380.2569306 | 0.287406746  | 0.758596682  | 0.3450565 |
| <b>csdL</b> | gi 49175990 ref NC_000913.2 | - | 2943058 | 2943864 | 435.6368799 | 400.7789898 | 405.4508303 | 388.8151896 | 275.2760383 | 0.271686207  | 0.568472305  | 0.2488581 |
| <b>mltA</b> | gi 49175990 ref NC_000913.2 | - | 2944103 | 2945200 | 704.7938265 | 505.7065513 | 505.7265659 | 475.5793235 | 594.2333029 | 0.422372182  | 1.289573479  | 0.6874068 |
| <b>amiC</b> | gi 49175990 ref NC_000913.2 | - | 2945779 | 2947032 | 1220.032555 | 1108.380903 | 889.1838909 | 961.8681927 | 932.1604153 | 0.33803802   | 0.894814871  | 0.4285397 |
| <b>argA</b> | gi 49175990 ref NC_000913.2 | + | 2947264 | 2948595 | 216.7152766 | 195.6146208 | 180.9921793 | 211.8066289 | 211.9165605 | 0.03899598   | 0.047132203  | 0.0075492 |
| <b>recD</b> | gi 49175990 ref NC_000913.2 | - | 2948657 | 2950483 | 525.3850654 | 463.4473221 | 565.9116439 | 515.7218597 | 455.6728074 | -0.026202793 | 0.083772171  | 0.021045  |
| <b>recB</b> | gi 49175990 ref NC_000913.2 | - | 2950483 | 2954025 | 1440.116613 | 1360.099046 | 1493.233132 | 1279.349448 | 1267.703445 | 0.072684021  | 0.10102376   | 0.0266333 |
| <b>ptrA</b> | gi 49175990 ref NC_000913.2 | - | 2954018 | 2956906 | 1293.673015 | 1239.479808 | 1314.822756 | 1249.082921 | 1388.591436 | -0.050805254 | 0.0944496102 | 0.0250659 |
| <b>recC</b> | gi 49175990 ref NC_000913.2 | - | 2957082 | 2960450 | 1143.252367 | 1173.975731 | 1256.324713 | 1225.437492 | 1221.602405 | -0.093854619 | 0.168791999  | 0.0531308 |
| <b>ppdC</b> | gi 49175990 ref NC_000913.2 | - | 2960463 | 2960786 | 96.54282855 | 121.6584506 | 94.22420648 | 88.67662499 | 99.74578495 | 0.182485271  | 0.432926438  | 0.1770091 |

|             |                             |   |         |         |             |             |             |             |              |              |             |           |
|-------------|-----------------------------|---|---------|---------|-------------|-------------|-------------|-------------|--------------|--------------|-------------|-----------|
| <b>ygdB</b> | gi 49175990 ref NC_000913.2 | - | 2960771 | 2961178 | 62.80132233 | 53.13531939 | 62.09880297 | 58.29487958 | 52.84701078  | 0.030226162  | 0.00045272  | 0         |
| <b>ppdB</b> | gi 49175990 ref NC_000913.2 | - | 2961175 | 2961738 | 86.03088183 | 77.8464482  | 78.54741295 | 87.38256678 | 84.1261214   | -0.015741288 | 0.020534469 | 0         |
| <b>ppdA</b> | gi 49175990 ref NC_000913.2 | - | 2961729 | 2962199 | 57.06369424 | 49.3438511  | 37.48763469 | 48.0318243  | 39.33778577  | 0.365057477  | 0.682297352 | 0.3057851 |
| <b>thyA</b> | gi 49175990 ref NC_000913.2 | - | 2962383 | 2963177 | 1109.252238 | 1115.077261 | 925.8513246 | 904.7424442 | 847.0341141  | 0.319507782  | 0.86641558  | 0.4097061 |
| <b>lgt</b>  | gi 49175990 ref NC_000913.2 | - | 2963184 | 2964059 | 1215.291104 | 1211.004081 | 1116.746136 | 1091.917276 | 946.977684   | 0.2111054876 | 0.47795646  | 0.2010025 |
| <b>ptsP</b> | gi 49175990 ref NC_000913.2 | - | 2964210 | 2966456 | 2081.031147 | 2070.582968 | 2124.830284 | 1955.266097 | 1736.6926    | 0.106606557  | 0.178300016 | 0.0563259 |
| <b>rppH</b> | gi 49175990 ref NC_000913.2 | - | 2966469 | 2966999 | 2105.660831 | 2082.92772  | 2142.897713 | 2264.67317  | 2247.934231  | -0.084179555 | 0.139935077 | 0.0418239 |
| <b>mutH</b> | gi 49175990 ref NC_000913.2 | + | 2967684 | 2968373 | 133.4114193 | 150.1126035 | 119.531481  | 117.7923921 | 128.9089412  | 0.199086545  | 0.458583068 | 0.1918802 |
| <b>ygdQ</b> | gi 49175990 ref NC_000913.2 | + | 2968442 | 2969155 | 407.6051579 | 406.5139889 | 341.501281  | 372.2466651 | 411.4758023  | 0.111860409  | 0.228207922 | 0.0798549 |
| <b>ygdR</b> | gi 49175990 ref NC_000913.2 | + | 2969293 | 2969511 | 2139.909138 | 2411.625943 | 2555.507096 | 2325.538386 | 3053.000322  | -0.236629254 | 0.44081206  | 0.1808157 |
| <b>tas</b>  | gi 49175990 ref NC_000913.2 | + | 2969619 | 2970659 | 1176.564497 | 1254.72786  | 1269.720769 | 1241.175079 | 1310.129316  | -0.076698417 | 0.11573312  | 0.0327284 |
| <b>lplT</b> | gi 49175990 ref NC_000913.2 | - | 2970691 | 2971884 | 396.1846514 | 402.7233198 | 473.1787319 | 458.4506127 | 379.435572   | -0.125599788 | 0.249575798 | 0.089991  |
| <b>aas</b>  | gi 49175990 ref NC_000913.2 | - | 2971877 | 2974036 | 843.2808729 | 930.858165  | 827.7297085 | 764.741741  | 822.1922911  | 0.128358043  | 0.25976626  | 0.1152438 |
| <b>galR</b> | gi 49175990 ref NC_000913.2 | + | 2974621 | 2975652 | 623.1765365 | 552.7314808 | 897.8035431 | 921.3714437 | 703.6961364  | -0.494251732 | 1.700155268 | 0.9806619 |
| <b>lysA</b> | gi 49175990 ref NC_000913.2 | - | 2975659 | 2976921 | 163.4867682 | 158.6021536 | 193.8314096 | 184.0120055 | 215.2058714  | -0.292698917 | 0.682404542 | 0.3057851 |
| <b>lysR</b> | gi 49175990 ref NC_000913.2 | + | 2977043 | 2977978 | 224.6519926 | 221.2955321 | 212.6184694 | 228.699817  | 236.6010602  | -0.02130863  | 0.022659657 | 0.0005477 |
| <b>ygeA</b> | gi 49175990 ref NC_000913.2 | - | 2977965 | 2978657 | 212.0585561 | 207.0447063 | 255.1633147 | 196.4079671 | 204.2941075  | -0.045548477 | 0.09171411  | 0.0238778 |
| <b>araE</b> | gi 49175990 ref NC_000913.2 | - | 2978786 | 2980204 | 175.7798699 | 153.8122176 | 183.7885354 | 208.5678511 | 240.8965754  | -0.348625838 | 0.846937146 | 0.3971622 |
| <b>kduD</b> | gi 49175990 ref NC_000913.2 | - | 2980519 | 2981280 | 127.8882957 | 108.2125353 | 188.1770413 | 200.4677668 | 150.6269591  | -0.581579476 | 1.844251559 | 1.0837566 |
| <b>kdul</b> | gi 49175990 ref NC_000913.2 | - | 2981310 | 2982146 | 91.26261042 | 98.80461143 | 97.48255474 | 126.4796493 | 113.2935866  | -0.26068438  | 0.500269126 | 0.213194  |
| <b>yqeF</b> | gi 49175990 ref NC_000913.2 | - | 2982433 | 2983614 | 279.5059548 | 279.2399949 | 394.3469426 | 327.427761  | 281.8883969  | -0.246386322 | 0.570106413 | 0.2491116 |
| <b>yqeG</b> | gi 49175990 ref NC_000913.2 | + | 2983869 | 2985098 | 557.5697406 | 592.7066304 | 328.8242175 | 345.6486355 | 553.3489036  | 0.467504975  | 1.412626247 | 0.7674428 |
| <b>yqeH</b> | gi 49175990 ref NC_000913.2 | + | 2985558 | 2986190 | 18.15697204 | 19.95787056 | 1.762701944 | 6.69566858  | 8.824624328  | 1.664889455  | 3.888435554 | 2.7656595 |
| <b>yqel</b> | gi 49175990 ref NC_000913.2 | + | 2986524 | 2987333 | 46.4266826  | 52.26938759 | 40.90800172 | 68.18552027 | 68.21966215  | -0.292201243 | 0.43277294  | 0.1770091 |
| <b>ygeH</b> | gi 49175990 ref NC_000913.2 | + | 2990116 | 2991492 | 8.14079456  | 8.54825971  | 9.603035511 | 11.26268157 | 15.55679271  | -0.545535566 | 0.572261657 | 0.2499251 |
| <b>insD</b> | gi 49175990 ref NC_000913.2 | - | 2994394 | 2995299 | 1296.233766 | 1229.026949 | 1154.275566 | 1169.333336 | 1138.600913  | 0.137349545  | 0.269222472 | 0.0994297 |
| <b>insC</b> | gi 49175990 ref NC_000913.2 | - | 2995257 | 2995622 | 733.3581122 | 841.5941312 | 806.8778844 | 837.4979753 | 860.3109514  | -0.106515361 | 0.155133336 | 0.0487535 |
| <b>ygeR</b> | gi 49175990 ref NC_000913.2 | - | 2997158 | 2997913 | 846.3561387 | 956.5143739 | 1040.385104 | 1116.585283 | 1073.5167753 | -0.276544879 | 0.608783517 | 0.2691543 |
| <b>xdhA</b> | gi 49175990 ref NC_000913.2 | + | 2998367 | 3000625 | 161.6817058 | 189.0727585 | 219.6608769 | 291.2038997 | 251.3019751  | -0.564946879 | 1.599970438 | 0.898541  |
| <b>xdhB</b> | gi 49175990 ref NC_000913.2 | + | 3000636 | 3001514 | 41.79087171 | 37.96343294 | 54.19861981 | 51.56659205 | 47.21854671  | -0.338604824 | 0.682195799 | 0.3057851 |
| <b>xdhC</b> | gi 49175990 ref NC_000913.2 | + | 3001511 | 3001990 | 33.52328479 | 31.32359545 | 32.33794527 | 47.92557036 | 34.89004827  | -0.243803961 | 0.374752024 | 0.1474503 |
| <b>ygeV</b> | gi 49175990 ref NC_000913.2 | - | 3002030 | 3003808 | 966.7602751 | 940.2963413 | 1743.11543  | 2398.961802 | 2251.198091  | -1.17027513  | 5.758669569 | 4.3942678 |
| <b>ygeW</b> | gi 49175990 ref NC_000913.2 | + | 3004284 | 3005474 | 25.29809588 | 23.72808696 | 34.0423907  | 63.43250852 | 41.64598229  | -0.925796894 | 2.308373511 | 1.4419641 |
| <b>ygeX</b> | gi 49175990 ref NC_000913.2 | + | 3005532 | 3006728 | 154.4240923 | 130.0539172 | 138.6600966 | 181.3767503 | 159.3036334  | -0.154703491 | 0.300470329 | 0.11561   |
| <b>ygeY</b> | gi 49175990 ref NC_000913.2 | + | 3006786 | 3007997 | 39.75993394 | 42.75758278 | 57.34302651 | 63.86603737 | 63.89869727  | -0.594607241 | 1.550879951 | 0.8653327 |
| <b>hyuA</b> | gi 49175990 ref NC_000913.2 | + | 3008050 | 3009435 | 42.05222083 | 46.56435513 | 60.59759875 | 42.87707856 | 58.22747178  | -0.284937351 | 0.489167672 | 0.2068165 |
| <b>yqeA</b> | gi 49175990 ref NC_000913.2 | + | 3009483 | 3010415 | 72.6107279  | 70.27104589 | 102.4697565 | 110.9770714 | 114.3465705  | -0.612049685 | 1.982081747 | 1.1850807 |
| <b>yqeB</b> | gi 49175990 ref NC_000913.2 | - | 3010636 | 3012261 | 216.7912868 | 190.8554784 | 689.6994108 | 715.1300614 | 590.2888154  | -1.685771329 | 12.69999529 | 10.62156  |
| <b>yqeC</b> | gi 49175990 ref NC_000913.2 | - | 3012309 | 3013079 | 97.00830112 | 79.71284779 | 390.1611356 | 404.6929544 | 391.5168283  | -2.137625444 | 17.59851138 | 15.10254  |
| <b>mocA</b> | gi 49175990 ref NC_000913.2 | + | 3013182 | 3013760 | 134.9463941 | 137.726353  | 377.9922004 | 514.4464401 | 540.393448   | -1.82601434  | 12.51801414 | 10.484145 |
| <b>ygfK</b> | gi 49175990 ref NC_000913.2 | + | 3014082 | 3017180 | 165.688052  | 179.5429841 | 338.4186441 | 407.6965698 | 283.0469311  | -1.001966189 | 4.376763722 | 3.1868051 |
| <b>ssnA</b> | gi 49175990 ref NC_000913.2 | + | 3017183 | 3018511 | 22.79911667 | 20.87508081 | 92.35375143 | 100.5414143 | 53.24782961  | -1.88691162  | 8.34473443  | 6.6986078 |
| <b>ygfM</b> | gi 49175990 ref NC_000913.2 | + | 3018562 | 3019341 | 26.96932875 | 29.45002783 | 78.74632397 | 106.1726235 | 78.69965986  | -1.650542989 | 7.907137889 | 6.2972235 |
| <b>xdhD</b> | gi 49175990 ref NC_000913.2 | + | 3019338 | 3022208 | 150.9636975 | 141.4923085 | 313.1509626 | 319.5000618 | 309.6385305  | -1.094042911 | 5.62113083  | 4.283058  |
| <b>xanQ</b> | gi 49175990 ref NC_000913.2 | + | 3022373 | 3023773 | 60.32897721 | 66.51337649 | 62.90729819 | 97.01347977 | 57.52274158  | -0.212062747 | 0.306161594 | 0.1186729 |
| <b>guaD</b> | gi 49175990 ref NC_000913.2 | + | 3023788 | 3025107 | 118.1558217 | 110.1478405 | 113.6275422 | 111.9656835 | 82.22121153  | 0.170190295  | 0.282223509 | 0.1071941 |
| <b>ygfQ</b> | gi 49175990 ref NC_000913.2 | + | 3025143 | 3026510 | 116.6567818 | 118.728804  | 99.71303083 | 118.6050203 | 93.28558318  | 0.175553345  | 0.35094615  | 0.1391697 |
| <b>ygfS</b> | gi 49175990 ref NC_000913.2 | - | 3026546 | 3027034 | 46.62688119 | 47.49133367 | 45.30018099 | 37.2741029  | 60.23024467  | -0.020648253 | 0.005975646 | 0         |
| <b>ygfT</b> | gi 49175990 ref NC_000913.2 | - | 3027034 | 3028953 | 58.33195994 | 67.47844303 | 72.8280509  | 67.33273663 | 69.56417695  | -0.165833583 | 0.249198345 | 0.0909169 |
| <b>ygfU</b> | gi 49175990 ref NC_000913.2 | + | 3029389 | 3030837 | 16.99970835 | 17.0929588  | 24.31883154 | 38.89914938 | 23.74209353  | -0.770247654 | 1.484557241 | 0.8131626 |
| <b>idi</b>  | gi 49175990 ref NC_000913.2 | + | 3031087 | 3031635 | 339.2929203 | 434.172032  | 300.7262096 | 384.3911436 | 382.3616377  | 0.074236244  | 0.225400986 | 0.0787822 |
| <b>lysB</b> | gi 49175990 ref NC_000913.2 | - | 3031679 | 3033196 | 3608.272433 | 3379.394389 | 2860.900704 | 2846.775725 | 3557.785879  | 0.181660457  | 0.374627434 | 0.1474503 |
| <b>prfB</b> | gi 49175990 ref NC_000913.2 | + | 3033206 | 3034228 | 2447.72336  | 2381.160556 | 1773.998757 | 1698.69101  | 1974.056429  | 0.41347747   | 1.150424474 | 0.5889647 |
| <b>recJ</b> | gi 49175990 ref NC_000913.2 | - | 3034395 | 3036128 | 1700.880889 | 1535.792932 | 1594.19524  | 1408.256098 | 1393.316239  | 0.164798129  | 0.285514459 | 0.1086502 |
| <b>dsbC</b> | gi 49175990 ref NC_000913.2 | - | 3036134 | 3036844 | 807.7519545 | 784.5266439 | 699.3477907 | 690.7127474 | 757.0495783  | 0.156109825  | 0.339904979 | 0.1335511 |
| <b>xerD</b> | gi 49175990 ref NC_000913.2 | - | 3036869 | 3037765 | 875.2930615 | 844.3615609 | 901.8967045 | 884.5267661 | 792.1297019  | 0.009460633  | 0.003120926 | 0         |
| <b>fldB</b> | gi 49175990 ref NC_000913.2 | + | 3037877 | 3038398 | 1008.870719 | 1029.601359 | 1077.244168 | 1071.805097 | 1039.90709   | -0.062455873 | 0.103374852 | 0.0276965 |

|             |                             |   |         |         |             |             |             |             |             |              |             |           |
|-------------|-----------------------------|---|---------|---------|-------------|-------------|-------------|-------------|-------------|--------------|-------------|-----------|
| <b>ygfX</b> | gi 49175990 ref NC_000913.2 | - | 3038438 | 3038845 | 799.3504632 | 822.5462063 | 1105.152425 | 1144.60275  | 1046.695817 | -0.441807028 | 1.343127105 | 0.7266489 |
| <b>ygfY</b> | gi 49175990 ref NC_000913.2 | - | 3038826 | 3039092 | 1012.348054 | 1130.324438 | 1385.997868 | 1293.807118 | 1195.947419 | -0.280234946 | 0.658280013 | 0.2958479 |
| <b>ygfZ</b> | gi 49175990 ref NC_000913.2 | + | 3039335 | 3040315 | 1485.422356 | 1454.147413 | 1362.222859 | 1315.067481 | 1192.584935 | 0.195678403  | 0.417385048 | 0.1708749 |
| <b>yqfA</b> | gi 49175990 ref NC_000913.2 | - | 3040511 | 3041170 | 857.3577264 | 893.7882863 | 1012.14681  | 995.5614152 | 946.8411054 | -0.17341131  | 0.350217357 | 0.1391697 |
| <b>yqfB</b> | gi 49175990 ref NC_000913.2 | - | 3041334 | 3041645 | 252.7871428 | 270.7218213 | 175.161643  | 179.3496332 | 171.6761898 | 0.568121102  | 1.959174715 | 1.1681457 |
| <b>bgIA</b> | gi 49175990 ref NC_000913.2 | + | 3041684 | 3043123 | 904.9965808 | 861.4519274 | 1048.420071 | 939.4242398 | 707.1666008 | -0.004582299 | 0.033617587 | 0.0030156 |
| <b>ygfF</b> | gi 49175990 ref NC_000913.2 | - | 3043180 | 3043923 | 239.0339275 | 200.3330113 | 517.2952714 | 468.3652159 | 259.876204  | -0.875983376 | 3.202755576 | 2.1737661 |
| <b>gcvP</b> | gi 49175990 ref NC_000913.2 | - | 3044190 | 3047063 | 5489.456734 | 4909.518954 | 13878.41626 | 11355.98572 | 7520.805899 | -1.032886614 | 4.113926949 | 2.9573309 |
| <b>gcvH</b> | gi 49175990 ref NC_000913.2 | - | 3047182 | 3047571 | 2189.037945 | 2114.260037 | 5716.429692 | 4379.262512 | 3406.140509 | -1.038404043 | 4.623294649 | 3.4025463 |
| <b>gcvT</b> | gi 49175990 ref NC_000913.2 | - | 3047595 | 3048689 | 6446.576609 | 5943.878429 | 13190.29935 | 11283.13478 | 8382.137503 | -0.794152622 | 2.913647843 | 1.9452075 |
| <b>visC</b> | gi 49175990 ref NC_000913.2 | - | 3049137 | 3050339 | 1308.517562 | 1365.845602 | 1746.425106 | 1500.14607  | 1344.122706 | -0.189699902 | 0.403568992 | 0.1637518 |
| <b>ubiH</b> | gi 49175990 ref NC_000913.2 | - | 3050362 | 3051540 | 1220.635225 | 1117.882766 | 1701.144287 | 1385.854773 | 1282.422239 | -0.291255251 | 0.780059969 | 0.3576663 |
| <b>pepP</b> | gi 49175990 ref NC_000913.2 | - | 3051537 | 3052862 | 2587.231674 | 2477.083886 | 3440.710319 | 2915.083097 | 2775.383607 | -0.24898242  | 0.617044145 | 0.2743015 |
| <b>ygfB</b> | gi 49175990 ref NC_000913.2 | - | 3052888 | 3053466 | 1409.115765 | 1362.009644 | 1625.035438 | 1469.972549 | 1608.516373 | -0.170551023 | 0.361259648 | 0.1426462 |
| <b>zapA</b> | gi 49175990 ref NC_000913.2 | + | 3053634 | 3053963 | 3002.296593 | 3575.172774 | 2619.627644 | 4457.37029  | 4759.027874 | -0.314018968 | 0.50484232  | 0.2150742 |
| <b>fau</b>  | gi 49175990 ref NC_000913.2 | + | 3054263 | 3054811 | 652.6981771 | 725.7017241 | 538.6266005 | 761.0412795 | 775.9731247 | -0.037454618 | 0.003566503 | 0         |
| <b>ibsC</b> | gi 49175990 ref NC_000913.2 | - | 3054912 | 3054971 | 426.0108183 | 498.7194031 | 707.0145564 | 772.755853  | 1170.328649 | -0.971148389 | 3.808120667 | 2.6965168 |
| <b>serA</b> | gi 49175990 ref NC_000913.2 | - | 3055200 | 3056432 | 1254.386826 | 1259.448079 | 1188.183267 | 1183.729636 | 885.4662559 | 0.217829731  | 0.474061047 | 0.1991532 |
| <b>rpiA</b> | gi 49175990 ref NC_000913.2 | - | 3056688 | 3057347 | 2441.244854 | 2490.411822 | 1965.129328 | 2124.480614 | 2026.997202 | 0.26861831   | 0.651551044 | 0.2917747 |
| <b>argP</b> | gi 49175990 ref NC_000913.2 | + | 3057775 | 3058668 | 932.4109764 | 982.1257594 | 791.9743305 | 960.9177724 | 1244.554272 | -0.085012099 | 0.096197084 | 0.057826  |
| <b>scpA</b> | gi 49175990 ref NC_000913.2 | + | 3058872 | 3061016 | 166.2775823 | 147.1684409 | 137.1558999 | 174.6228972 | 143.6927658 | 0.055111664  | 0.070871532 | 0.0170551 |
| <b>argK</b> | gi 49175990 ref NC_000913.2 | + | 3061009 | 3062004 | 40.81839393 | 31.27589836 | 33.36342955 | 32.60985714 | 40.23872403 | 0.051897443  | 0.015622838 | 0         |
| <b>scpB</b> | gi 49175990 ref NC_000913.2 | + | 3062015 | 3062800 | 26.69519291 | 22.75953856 | 18.90196054 | 23.49775007 | 23.50946063 | 0.180274072  | 0.205216773 | 0.0686433 |
| <b>scpC</b> | gi 49175990 ref NC_000913.2 | + | 3062824 | 3064302 | 73.8695     | 93.15831491 | 85.10517578 | 89.68111767 | 90.82870807 | -0.114786969 | 0.116004033 | 0.0327284 |
| <b>ygfI</b> | gi 49175990 ref NC_000913.2 | - | 3064299 | 3065195 | 123.39466   | 107.2728145 | 101.7523852 | 132.2209899 | 144.4498149 | -0.124528559 | 0.217203586 | 0.0750873 |
| <b>yggE</b> | gi 49175990 ref NC_000913.2 | - | 3065362 | 3066102 | 2448.443223 | 2323.210099 | 1422.847021 | 1650.215754 | 1636.5213   | 0.604158251  | 2.094296167 | 1.2725501 |
| <b>argO</b> | gi 49175990 ref NC_000913.2 | - | 3066195 | 3066830 | 241.3194512 | 267.8879189 | 148.4295865 | 119.1484335 | 161.2967469 | 0.82091731   | 3.411456558 | 2.3602507 |
| <b>mscS</b> | gi 49175990 ref NC_000913.2 | - | 3066969 | 3067829 | 2073.654708 | 2336.59071  | 951.7146181 | 810.6528329 | 731.6461966 | 1.401108284  | 9.616463068 | 7.8453977 |
| <b>fbA</b>  | gi 49175990 ref NC_000913.2 | - | 3068187 | 3069266 | 8789.949141 | 8492.245806 | 12566.66731 | 9952.496193 | 8506.525683 | -0.237290686 | 0.537244085 | 0.2313891 |
| <b>pgk</b>  | gi 49175990 ref NC_000913.2 | - | 3069481 | 3070644 | 7338.387253 | 7618.454071 | 9816.121557 | 7678.775627 | 6025.366668 | -0.053745088 | 0.099824625 | 0.0263424 |
| <b>epd</b>  | gi 49175990 ref NC_000913.2 | - | 3070694 | 3071713 | 4002.405524 | 4012.00175  | 5927.102372 | 5444.235136 | 4610.646591 | -0.402338077 | 1.099849834 | 0.5577652 |
| <b>yggC</b> | gi 49175990 ref NC_000913.2 | - | 3071998 | 3072711 | 431.9528863 | 466.3883587 | 394.1506179 | 403.6035592 | 402.6989837 | 0.154928753  | 0.363152546 | 0.1432896 |
| <b>yggD</b> | gi 49175990 ref NC_000913.2 | - | 3072708 | 3073217 | 473.070944  | 494.8683196 | 514.4289838 | 618.8742618 | 716.4289312 | -0.368091493 | 0.936455008 | 0.4552629 |
| <b>yggF</b> | gi 49175990 ref NC_000913.2 | - | 3073239 | 3074204 | 30.09672839 | 33.26229282 | 41.55752884 | 28.14290195 | 24.89376992 | 0.015188339  | 0           | 0         |
| <b>ygfP</b> | gi 49175990 ref NC_000913.2 | - | 3074201 | 3075478 | 11.53380892 | 18.10871562 | 15.85283841 | 15.67692621 | 13.53233497 | -0.05565734  | 0           | 0         |
| <b>cmtA</b> | gi 49175990 ref NC_000913.2 | - | 3075493 | 3076881 | 16.45879006 | 15.18035923 | 12.38869739 | 16.81425914 | 20.0486389  | -0.055692002 | 0           | 0         |
| <b>cmtB</b> | gi 49175990 ref NC_000913.2 | - | 3076909 | 3077352 | 4.271684875 | 5.711995943 | 0.38569443  | 8.864406531 | 9.930988512 | -0.435693129 | 0.146658879 | 0.0441955 |
| <b>tkfA</b> | gi 49175990 ref NC_000913.2 | - | 3077666 | 3079657 | 3242.529247 | 3390.845458 | 2470.384746 | 2285.073903 | 2653.856604 | 0.418924618  | 1.29752667  | 0.6927928 |
| <b>yggG</b> | gi 49175990 ref NC_000913.2 | + | 3079935 | 3080693 | 932.0786969 | 900.4010693 | 1010.288121 | 956.2236205 | 756.4259703 | 0.027240934  | 0.024206796 | 0.0005477 |
| <b>speB</b> | gi 49175990 ref NC_000913.2 | - | 3080899 | 3081819 | 778.7488762 | 751.2801228 | 1046.773709 | 797.3058213 | 736.1854706 | -0.147110127 | 0.342125606 | 0.1341942 |
| <b>speA</b> | gi 49175990 ref NC_000913.2 | - | 3081957 | 3083933 | 4108.633675 | 3873.299595 | 4362.441399 | 4071.089612 | 4967.901678 | -0.155891609 | 0.316317043 | 0.1237082 |
| <b>yqgB</b> | gi 49175990 ref NC_000913.2 | - | 3083942 | 3084073 | 137.4645601 | 140.5766027 | 126.7093678 | 116.965622  | 194.5468175 | -0.083299083 | 0.094683268 | 0.0250983 |
| <b>yqgC</b> | gi 49175990 ref NC_000913.2 | + | 3084209 | 3084424 | 973.0924328 | 1130.343467 | 993.7977471 | 1046.465726 | 1852.07215  | -0.342330901 | 0.606572343 | 0.2684995 |
| <b>metK</b> | gi 49175990 ref NC_000913.2 | + | 3084728 | 3085882 | 1101.267162 | 1040.012664 | 739.7770214 | 754.7863493 | 1052.755454 | 0.332803825  | 0.841489311 | 0.3950345 |
| <b>galP</b> | gi 49175990 ref NC_000913.2 | + | 3086306 | 3087700 | 3429.57867  | 3321.471974 | 9270.409262 | 8559.870928 | 7050.45339  | -1.282999121 | 6.926573204 | 5.4170293 |
| <b>yggI</b> | gi 49175990 ref NC_000913.2 | + | 3087777 | 3088274 | 158.6696638 | 176.7045969 | 135.4130876 | 137.9001654 | 137.971742  | 0.275643361  | 0.672095872 | 0.301217  |
| <b>endA</b> | gi 49175990 ref NC_000913.2 | + | 3088369 | 3089076 | 131.4341266 | 121.5419375 | 117.4266256 | 138.9919801 | 151.23561   | -0.102422899 | 0.164577361 | 0.0519869 |
| <b>rsmE</b> | gi 49175990 ref NC_000913.2 | + | 3089156 | 3089887 | 508.9979078 | 446.348226  | 458.9146895 | 450.6910781 | 430.8332911 | 0.116706632  | 0.187382059 | 0.0607696 |
| <b>gshB</b> | gi 49175990 ref NC_000913.2 | + | 3089900 | 3090850 | 663.2527203 | 643.9544656 | 701.1717279 | 668.07471   | 519.7497679 | 0.066693435  | 0.095353596 | 0.025393  |
| <b>yqgE</b> | gi 49175990 ref NC_000913.2 | + | 3090959 | 3091522 | 633.9745882 | 662.9852269 | 662.291949  | 689.5115521 | 714.4706002 | -0.096110195 | 0.159805951 | 0.049678  |
| <b>yqgF</b> | gi 49175990 ref NC_000913.2 | + | 3091522 | 3091938 | 324.8609466 | 332.4400843 | 284.184849  | 293.7723643 | 312.861152  | 0.140156661  | 0.298380315 | 0.1149772 |
| <b>yqgR</b> | gi 49175990 ref NC_000913.2 | - | 3092122 | 3093102 | 78.272698   | 98.85912249 | 75.01217032 | 93.00528834 | 100.7609384 | -0.055962374 | 0.014014262 | 0         |
| <b>yqgS</b> | gi 49175990 ref NC_000913.2 | + | 3093120 | 3093824 | 365.5758436 | 410.3667479 | 297.0631636 | 272.5668267 | 298.3258898 | 0.409181578  | 1.295397139 | 0.6910922 |
| <b>yqgT</b> | gi 49175990 ref NC_000913.2 | + | 3093842 | 3094408 | 423.8173381 | 448.332494  | 336.0401047 | 336.4819071 | 402.4450933 | 0.270891475  | 0.71114105  | 0.3184473 |
| <b>yqgU</b> | gi 49175990 ref NC_000913.2 | + | 3094405 | 3094695 | 245.2683292 | 210.7908105 | 185.4608975 | 136.0780652 | 203.8402769 | 0.40528357   | 0.940500856 | 0.4570426 |
| <b>rdgB</b> | gi 49175990 ref NC_000913.2 | + | 3094703 | 3095296 | 455.9506567 | 404.5621352 | 333.5566234 | 357.7125743 | 411.4269742 | 0.236921066  | 0.520579698 | 0.2226309 |
| <b>yqgW</b> | gi 49175990 ref NC_000913.2 | + | 3095289 | 3096425 | 639.2146744 | 631.6150493 | 493.95284   | 490.1087774 | 602.06878   | 0.261997211  | 0.644987741 | 0.2881689 |



|             |                             |   |         |         |             |             |             |             |             |              |             |           |
|-------------|-----------------------------|---|---------|---------|-------------|-------------|-------------|-------------|-------------|--------------|-------------|-----------|
| <b>yggM</b> | gi 49175990 ref NC_000913.2 | - | 3096580 | 3097587 | 91.18762153 | 101.6648305 | 86.40633624 | 131.1506212 | 167.6990374 | -0.449040749 | 0.878926661 | 0.4176149 |
| <b>ansB</b> | gi 49175990 ref NC_000913.2 | - | 3097704 | 3098750 | 4334.161525 | 3802.029414 | 19345.75101 | 15496.39852 | 10346.45865 | -1.847320991 | 10.83501028 | 8.9885239 |
| <b>yggN</b> | gi 49175990 ref NC_000913.2 | - | 3098926 | 3099645 | 299.7417494 | 295.3808083 | 465.62433   | 428.4307719 | 483.3612139 | -0.622349406 | 2.30419398  | 1.4393544 |
| <b>yggL</b> | gi 49175990 ref NC_000913.2 | - | 3098829 | 3100155 | 750.76513   | 772.2059364 | 725.5883123 | 735.3911705 | 660.8572261 | 0.104554526  | 2.016848422 | 0.0750873 |
| <b>trml</b> | gi 49175990 ref NC_000913.2 | - | 3100155 | 3100874 | 767.7710618 | 796.9053365 | 663.3309545 | 668.1740207 | 639.4579545 | 0.247394951  | 0.638710698 | 0.2852082 |
| <b>mutY</b> | gi 49175990 ref NC_000913.2 | + | 3101035 | 3102087 | 948.9964811 | 948.8576491 | 747.6789362 | 827.4703786 | 969.978218  | 0.1525852    | 0.338684239 | 0.1335511 |
| <b>yggX</b> | gi 49175990 ref NC_000913.2 | + | 3102115 | 3102390 | 508.8843386 | 461.5601714 | 296.5308169 | 327.4349431 | 382.2199025 | 0.53777135   | 1.811217624 | 1.0592385 |
| <b>mitC</b> | gi 49175990 ref NC_000913.2 | + | 3102455 | 3103534 | 281.611732  | 263.0642917 | 270.8834113 | 286.9813704 | 286.017619  | -0.039957164 | 0.069853747 | 0.0170551 |
| <b>nupG</b> | gi 49175990 ref NC_000913.2 | + | 3103736 | 3104992 | 1149.779512 | 1109.358968 | 1975.664028 | 1974.4007   | 2118.85457  | -0.837311484 | 3.572202031 | 2.5001067 |
| <b>speC</b> | gi 49175990 ref NC_000913.2 | - | 3105042 | 3107177 | 469.0257558 | 438.7787164 | 498.5324855 | 478.7038507 | 436.5235634 | -0.040366131 | 0.090485002 | 0.023835  |
| <b>yqgA</b> | gi 49175990 ref NC_000913.2 | + | 3107575 | 3108282 | 257.5012304 | 250.7346402 | 493.0862506 | 441.8077292 | 433.1076509 | -0.83339098  | 3.757421439 | 2.6526686 |
| <b>yghD</b> | gi 49175990 ref NC_000913.2 | - | 3108612 | 3109148 | 124.8757061 | 126.3250794 | 74.03378998 | 90.94254399 | 128.4636173 | 0.342822405  | 0.809158492 | 0.3724304 |
| <b>yghG</b> | gi 49175990 ref NC_000913.2 | - | 3111089 | 3111499 | 6.629690701 | 10.48804508 | 8.063233974 | 6.821611073 | 11.10545061 | -0.055394062 | 0           | 0         |
| <b>pppA</b> | gi 49175990 ref NC_000913.2 | - | 3111565 | 3112374 | 97.0990511  | 98.78229471 | 75.98116671 | 62.04789882 | 109.3964045 | 0.240699505  | 0.455464957 | 0.1898325 |
| <b>yghJ</b> | gi 49175990 ref NC_000913.2 | - | 3112572 | 3117134 | 277.3107989 | 304.9270722 | 187.388033  | 200.6739262 | 207.441935  | 0.535372503  | 1.887464271 | 1.116399  |
| <b>glcA</b> | gi 49175990 ref NC_000913.2 | - | 3117619 | 3119301 | 70.23751215 | 63.60162572 | 40.68498013 | 64.76976306 | 57.14878299 | 0.300290855  | 0.595290869 | 0.2640613 |
| <b>glcB</b> | gi 49175990 ref NC_000913.2 | - | 3119656 | 3121827 | 526.7687145 | 448.2344715 | 634.611215  | 548.2616382 | 471.4504782 | -0.143849415 | 0.363652018 | 0.1434578 |
| <b>glcG</b> | gi 49175990 ref NC_000913.2 | - | 3121849 | 3122253 | 112.9860441 | 110.16449   | 135.8875673 | 117.7140094 | 96.77022552 | -0.051081304 | 0.091039247 | 0.023835  |
| <b>glcF</b> | gi 49175990 ref NC_000913.2 | - | 3122258 | 3123481 | 166.7709958 | 154.7853534 | 180.1279475 | 172.627163  | 154.9680215 | -0.059363476 | 0.118417911 | 0.0339371 |
| <b>glcE</b> | gi 49175990 ref NC_000913.2 | - | 3123492 | 3124544 | 9.428627112 | 9.49423632  | 9.288861424 | 7.911895842 | 10.05802026 | 0.063607689  | 0.014193893 | 0         |
| <b>glcD</b> | gi 49175990 ref NC_000913.2 | - | 3124544 | 3126043 | 18.89251215 | 18.99262747 | 18.90193291 | 28.88798332 | 18.10164176 | -0.218489137 | 0.209872302 | 0.0715429 |
| <b>glcC</b> | gi 49175990 ref NC_000913.2 | + | 3126294 | 3127058 | 155.6702442 | 164.3349653 | 143.4294035 | 139.1289325 | 158.031422  | 0.11511752   | 0.218413636 | 0.0758113 |
| <b>insH</b> | gi 49175990 ref NC_000913.2 | + | 3128200 | 3129216 | 911.5673935 | 965.9818134 | 856.2446622 | 1002.136914 | 933.2864524 | -0.001688187 | 0.023104184 | 0.0005477 |
| <b>yghQ</b> | gi 49175990 ref NC_000913.2 | - | 3129363 | 3130430 | 55.3957218  | 42.6654214  | 61.53944354 | 70.63439431 | 78.35476387 | -0.494636849 | 1.264189454 | 0.6692154 |
| <b>yghR</b> | gi 49175990 ref NC_000913.2 | - | 3130476 | 3131234 | 7.920419408 | 11.43256103 | 5.525194489 | 3.526769036 | 12.07846184 | 0.413024471  | 0.434422156 | 0.1772689 |
| <b>yghS</b> | gi 49175990 ref NC_000913.2 | - | 3131266 | 3131979 | 9.076934583 | 14.2991947  | 13.38445383 | 13.49342626 | 15.64984678 | -0.316644686 | 0.235945534 | 0.0837617 |
| <b>yghT</b> | gi 49175990 ref NC_000913.2 | + | 3132153 | 3132845 | 7.535887652 | 7.594538163 | 1.734057652 | 9.855828008 | 4.544355052 | 0.451773723  | 0.325816284 | 0.1268477 |
| <b>pitB</b> | gi 49175990 ref NC_000913.2 | - | 3132894 | 3134393 | 13.56035108 | 18.08634601 | 15.9698554  | 14.64705462 | 17.88457136 | -0.055683967 | 0           | 0         |
| <b>gss</b>  | gi 49175990 ref NC_000913.2 | - | 3134685 | 3136544 | 1359.120251 | 1369.628001 | 1271.585752 | 1132.366216 | 994.1407162 | 0.276857184  | 0.669699027 | 0.2998344 |
| <b>yghU</b> | gi 49175990 ref NC_000913.2 | + | 3136749 | 3137615 | 448.8413538 | 418.8316362 | 631.8203422 | 554.9085632 | 428.9445033 | -0.289052536 | 0.756579547 | 0.3439111 |
| <b>hybG</b> | gi 49175990 ref NC_000913.2 | - | 3137738 | 3137986 | 124.0647773 | 106.31783   | 333.926105  | 294.9725091 | 301.8128111 | -1.403204546 | 8.512562805 | 6.8471311 |
| <b>hybF</b> | gi 49175990 ref NC_000913.2 | - | 3137999 | 3138340 | 115.9886505 | 119.6838167 | 461.1765728 | 404.828954  | 399.4607985 | -1.835683254 | 13.64544853 | 11.497932 |
| <b>hybE</b> | gi 49175990 ref NC_000913.2 | - | 3138333 | 3138821 | 268.5899287 | 284.9650886 | 1173.108977 | 889.3289778 | 945.7600007 | -1.851612057 | 14.33479688 | 12.105094 |
| <b>hybD</b> | gi 49175990 ref NC_000913.2 | - | 3138814 | 3139308 | 263.385435  | 240.259048  | 1415.017496 | 1077.445525 | 763.4280951 | -2.071132736 | 14.85655199 | 12.58906  |
| <b>hybC</b> | gi 49175990 ref NC_000913.2 | - | 3139308 | 3141011 | 738.8986264 | 733.2468647 | 3947.554022 | 2900.474558 | 2101.669928 | -1.992316668 | 12.28560942 | 10.319148 |
| <b>hybB</b> | gi 49175990 ref NC_000913.2 | - | 3141008 | 3142186 | 688.4677046 | 673.4020308 | 2991.58557  | 2366.797525 | 1905.192372 | -1.808388262 | 11.55861803 | 9.6569018 |
| <b>hybA</b> | gi 49175990 ref NC_000913.2 | - | 3142176 | 3143162 | 985.9660334 | 886.1202923 | 3949.595712 | 3213.231911 | 2570.371198 | -1.761022108 | 11.16182164 | 9.2922699 |
| <b>hybO</b> | gi 49175990 ref NC_000913.2 | - | 3143165 | 3144283 | 1117.09555  | 1039.055734 | 4240.77299  | 3731.206753 | 3359.858231 | -1.788862319 | 12.54630635 | 10.486446 |
| <b>yghW</b> | gi 49175990 ref NC_000913.2 | - | 3144472 | 3144759 | 10.11035759 | 9.486840646 | 20.27345482 | 26.81169462 | 24.66299319 | -1.278034838 | 3.009326022 | 2.0214758 |
| <b>gpr</b>  | gi 49175990 ref NC_000913.2 | + | 3145919 | 3146959 | 526.5860893 | 570.8700082 | 1021.874614 | 943.8305968 | 656.7618345 | -0.670063976 | 2.406190504 | 1.5230033 |
| <b>yqhA</b> | gi 49175990 ref NC_000913.2 | - | 3146999 | 3147493 | 716.2277296 | 845.4067921 | 810.4809393 | 762.4603969 | 790.8242167 | -0.034496719 | 0.01703851  | 0         |
| <b>yghA</b> | gi 49175990 ref NC_000913.2 | + | 3147684 | 3148568 | 284.5465835 | 284.9398811 | 325.2498859 | 410.9806454 | 270.7434715 | -0.239681357 | 0.491569481 | 0.2084005 |
| <b>exbD</b> | gi 49175990 ref NC_000913.2 | - | 3148840 | 3149265 | 873.8511279 | 888.0773776 | 342.6497263 | 265.9021216 | 267.1558633 | 1.603926088  | 12.28798699 | 10.319148 |
| <b>exbB</b> | gi 49175990 ref NC_000913.2 | - | 3149272 | 3150006 | 1924.516553 | 1929.064576 | 787.3483822 | 622.4912471 | 694.3855053 | 1.466843063  | 10.88704416 | 9.0330046 |
| <b>metC</b> | gi 49175990 ref NC_000913.2 | + | 3150258 | 3151445 | 337.3440428 | 296.2806387 | 337.7544691 | 296.0607977 | 285.0734972 | 0.074142869  | 0.083533994 | 0.021045  |
| <b>yghB</b> | gi 49175990 ref NC_000913.2 | + | 3151585 | 3152244 | 810.4294157 | 905.2188187 | 1300.191684 | 1270.310253 | 1314.647503 | -0.609650175 | 2.188784982 | 1.3422986 |
| <b>yqhC</b> | gi 49175990 ref NC_000913.2 | - | 3152284 | 3153240 | 163.8573167 | 173.8353151 | 140.4078332 | 131.2150398 | 129.0698194 | 0.334043734  | 0.844094728 | 0.3958477 |
| <b>yqhD</b> | gi 49175990 ref NC_000913.2 | + | 3153377 | 3154540 | 1186.112437 | 1031.425963 | 1601.47798  | 1278.222662 | 1146.748927 | -0.24072089  | 0.624795141 | 0.2789898 |
| <b>dkqA</b> | gi 49175990 ref NC_000913.2 | + | 3154645 | 3155472 | 498.6239432 | 474.8794806 | 733.1250899 | 762.072557  | 513.1420986 | -0.445599908 | 1.287057325 | 0.6853171 |
| <b>yqhG</b> | gi 49175990 ref NC_000913.2 | + | 3155672 | 3156598 | 60.07434021 | 74.14949762 | 46.31369045 | 81.55571187 | 76.11333313 | -0.06419911  | 0.012190856 | 0         |
| <b>yqhH</b> | gi 49175990 ref NC_000913.2 | + | 3156649 | 3156906 | 52.85009149 | 56.05205558 | 35.25094192 | 43.79025644 | 57.99190767 | 0.233032355  | 0.426269344 | 0.1746266 |
| <b>ygiQ</b> | gi 49175990 ref NC_000913.2 | - | 3156949 | 3159168 | 1344.785789 | 1287.919991 | 981.9972471 | 974.373684  | 1086.805555 | 0.379678896  | 1.122033869 | 0.5694051 |
| <b>ftsP</b> | gi 49175990 ref NC_000913.2 | - | 3159279 | 3160691 | 1061.826229 | 1098.944311 | 973.2353033 | 811.9053878 | 873.8725486 | 0.288273578  | 0.726501241 | 0.3255653 |
| <b>plsC</b> | gi 49175990 ref NC_000913.2 | - | 3160766 | 3161503 | 452.8844667 | 473.0218784 | 380.0188849 | 373.5872267 | 507.6922804 | 0.125787316  | 0.272447047 | 0.1012332 |
| <b>parC</b> | gi 49175990 ref NC_000913.2 | - | 3161737 | 3163995 | 1579.0714   | 1436.066138 | 1458.003928 | 1320.900724 | 1531.023675 | 0.084280723  | 0.124361128 | 0.0369374 |
| <b>ygiS</b> | gi 49175990 ref NC_000913.2 | - | 3164133 | 3165740 | 585.4544921 | 600.2883856 | 913.4168081 | 602.6267964 | 937.4406533 | -0.458457602 | 1.328310582 | 0.7163989 |
| <b>mqsA</b> | gi 49175990 ref NC_000913.2 | - | 3165873 | 3166268 | 169.4167099 | 187.1496253 | 140.008423  | 176.9763857 | 169.3084838 | 0.114610488  | 0.247278749 | 0.0903598 |

|             |                             |   |         |         |             |             |             |             |             |              |             |           |
|-------------|-----------------------------|---|---------|---------|-------------|-------------|-------------|-------------|-------------|--------------|-------------|-----------|
| <b>mqsr</b> | gi 49175990 ref NC_000913.2 | - | 3166270 | 3166566 | 221.4049503 | 276.4876018 | 177.8812011 | 249.979484  | 304.6018    | -0.021960644 | 0.042840281 | 0.0058947 |
| <b>ygiV</b> | gi 49175990 ref NC_000913.2 | - | 3166771 | 3167253 | 134.5579151 | 157.727826  | 150.2296929 | 161.4290471 | 165.9465782 | -0.147851706 | 0.207911818 | 0.070315  |
| <b>ygiW</b> | gi 49175990 ref NC_000913.2 | - | 3167306 | 3167698 | 1051.548252 | 1147.410037 | 975.1270256 | 1433.600476 | 1327.989975 | -0.209162989 | 0.357842964 | 0.1415056 |
| <b>qseB</b> | gi 49175990 ref NC_000913.2 | + | 3167850 | 3168509 | 130.3764965 | 140.5973245 | 104.3302948 | 127.8064507 | 147.7734508 | 0.075745919  | 0.163329838 | 0.0517718 |
| <b>qseC</b> | gi 49175990 ref NC_000913.2 | + | 3168506 | 3168855 | 141.4481971 | 134.8504646 | 145.4885251 | 133.4146667 | 119.0955954 | 0.071607971  | 0.091203016 | 0.023835  |
| <b>mdaB</b> | gi 49175990 ref NC_000913.2 | + | 3170552 | 3171133 | 336.7171889 | 359.0532907 | 221.1234555 | 263.4806323 | 305.9054316 | 0.380140229  | 1.120161741 | 0.5686948 |
| <b>ygiN</b> | gi 49175990 ref NC_000913.2 | + | 3171164 | 3171478 | 2651.892305 | 2788.667474 | 3586.530913 | 3508.254846 | 4343.030275 | -0.498865953 | 1.480318376 | 0.8114182 |
| <b>parE</b> | gi 49175990 ref NC_000913.2 | - | 3171526 | 3173418 | 2161.762984 | 2173.167594 | 1843.005936 | 1795.079333 | 2036.898437 | 0.193631685  | 0.414160056 | 0.1691717 |
| <b>yqiA</b> | gi 49175990 ref NC_000913.2 | - | 3173447 | 3174028 | 741.5493184 | 853.9433711 | 718.4364458 | 791.580867  | 910.5619587 | -0.04485053  | 0.022215507 | 0.0004107 |
| <b>cpdA</b> | gi 49175990 ref NC_000913.2 | - | 3174028 | 3174855 | 1302.792097 | 1378.199592 | 1881.269685 | 1887.989678 | 1828.483145 | -0.484508634 | 1.437922344 | 0.7820287 |
| <b>yqiB</b> | gi 49175990 ref NC_000913.2 | - | 3174880 | 3175302 | 936.9772462 | 945.0625285 | 1182.700418 | 1297.185023 | 1429.993805 | -0.478127812 | 1.486739347 | 0.8143428 |
| <b>nudF</b> | gi 49175990 ref NC_000913.2 | - | 3175303 | 3175932 | 600.0995107 | 591.7220067 | 694.9394387 | 642.4943695 | 651.7754596 | -0.148307815 | 0.317862696 | 0.1239842 |
| <b>toiC</b> | gi 49175990 ref NC_000913.2 | + | 3176137 | 3177618 | 4424.288234 | 4769.037217 | 3661.85847  | 3612.39575  | 3842.983482 | 0.299005909  | 0.802203645 | 0.3701238 |
| <b>ygiB</b> | gi 49175990 ref NC_000913.2 | + | 3177766 | 3178437 | 2127.525076 | 2240.626754 | 2767.136388 | 2401.6677   | 2599.059054 | -0.247619638 | 0.540130719 | 0.2323307 |
| <b>ygiC</b> | gi 49175990 ref NC_000913.2 | + | 3178443 | 3179603 | 2298.825746 | 2224.430979 | 2796.359121 | 2526.039621 | 2567.714566 | -0.208018305 | 0.461294671 | 0.1934841 |
| <b>ygiD</b> | gi 49175990 ref NC_000913.2 | - | 3179641 | 3180429 | 209.879621  | 225.1308277 | 241.8052575 | 261.2007568 | 266.9006996 | -0.252041141 | 0.524901575 | 0.2249696 |
| <b>zupT</b> | gi 49175990 ref NC_000913.2 | + | 3180572 | 3181345 | 859.8088415 | 915.6440797 | 1060.179633 | 1096.449809 | 1076.876923 | -0.290118902 | 0.693213196 | 0.3103556 |
| <b>ribB</b> | gi 49175990 ref NC_000913.2 | - | 3181835 | 3182488 | 1432.555692 | 1348.699821 | 1197.638152 | 1310.234276 | 857.5307225 | 0.323714758  | 0.755547823 | 0.3439111 |
| <b>yqiC</b> | gi 49175990 ref NC_000913.2 | + | 3182862 | 3183152 | 619.7585043 | 716.2217948 | 518.8184749 | 714.0727341 | 811.7059341 | -0.067595107 | 0.039959613 | 0.0045376 |
| <b>ygiL</b> | gi 49175990 ref NC_000913.2 | + | 3183436 | 3183987 | 11.63460477 | 7.551784695 | 6.575344932 | 8.822529222 | 2.402451796 | 0.728210664  | 0.71425376  | 0.3718473 |
| <b>insC</b> | gi 49175990 ref NC_000913.2 | + | 3184209 | 3184574 | 751.1521776 | 830.178483  | 822.5985313 | 794.9776136 | 851.3278069 | -0.071994724 | 0.10016939  | 0.0264593 |
| <b>insD</b> | gi 49175990 ref NC_000913.2 | + | 3184532 | 3185437 | 1283.606528 | 1219.529796 | 1089.424923 | 1163.664621 | 1101.587091 | 0.167877919  | 0.355680272 | 0.1411458 |
| <b>yqiH</b> | gi 49175990 ref NC_000913.2 | + | 3187903 | 3188652 | 20.23636286 | 30.47525574 | 35.14442997 | 38.28311017 | 57.92692339 | -0.838519411 | 1.763131201 | 1.0282781 |
| <b>yqiI</b> | gi 49175990 ref NC_000913.2 | + | 3188654 | 3189718 | 54.2391381  | 54.13432198 | 38.71173212 | 92.51428915 | 72.82540115 | -0.355022971 | 0.507316871 | 0.2163002 |
| <b>glgS</b> | gi 49175990 ref NC_000913.2 | - | 3189761 | 3189961 | 600.3440001 | 550.8472326 | 893.2444424 | 1087.171519 | 854.9853064 | -0.707492987 | 2.906556371 | 1.9391065 |
| <b>yqiJ</b> | gi 49175990 ref NC_000913.2 | + | 3190230 | 3190859 | 184.3485564 | 176.6433211 | 145.8988409 | 207.3001753 | 231.8301508 | -0.123760213 | 0.173783085 | 0.0547989 |
| <b>ybiK</b> | gi 49175990 ref NC_000913.2 | + | 3190886 | 3192547 | 189.228321  | 191.8634234 | 198.7498596 | 302.2595598 | 242.3512159 | -0.394917308 | 0.911597663 | 0.4403017 |
| <b>ibsD</b> | gi 49175990 ref NC_000913.2 | + | 3192788 | 3192847 | 2221.855224 | 1796.93978  | 2414.446231 | 3963.385464 | 6217.698444 | -1.065685244 | 3.430449469 | 2.3732033 |
| <b>ibsE</b> | gi 49175990 ref NC_000913.2 | + | 3193163 | 3193222 | 369.4177475 | 407.5093729 | 367.9347746 | 494.600587  | 742.8178581 | -0.499106064 | 1.125571937 | 0.5718716 |
| <b>rfaE</b> | gi 49175990 ref NC_000913.2 | - | 3193342 | 3194775 | 960.612179  | 891.8342214 | 920.8395897 | 804.8764127 | 572.6361176 | 0.299827923  | 0.640452974 | 0.2862934 |
| <b>glnE</b> | gi 49175990 ref NC_000913.2 | - | 3194823 | 3197663 | 904.4567401 | 838.644261  | 896.8555443 | 770.1309503 | 541.2507769 | 0.27117641   | 0.539450323 | 0.2319924 |
| <b>ygiF</b> | gi 49175990 ref NC_000913.2 | - | 3197686 | 3198987 | 346.5711401 | 327.6560856 | 389.1804698 | 349.7252438 | 271.8637385 | 0.020181313  | 0           | 0         |
| <b>ygiM</b> | gi 49175990 ref NC_000913.2 | + | 3199229 | 3199849 | 1343.543975 | 1279.368975 | 1155.648862 | 1587.421303 | 1767.446451 | -0.207929345 | 0.387407453 | 0.1543669 |
| <b>cca</b>  | gi 49175990 ref NC_000913.2 | + | 3199913 | 3201151 | 1717.737722 | 1631.747852 | 1671.780382 | 1658.231186 | 1752.078812 | -0.010135335 | 0.021829334 | 0.0004107 |
| <b>bacA</b> | gi 49175990 ref NC_000913.2 | - | 3201332 | 3202153 | 446.2680381 | 422.6374963 | 405.8525059 | 391.3118493 | 389.2853579 | 0.145200953  | 0.279283534 | 0.1053727 |
| <b>folB</b> | gi 49175990 ref NC_000913.2 | - | 3202243 | 3202611 | 208.467152  | 190.871569  | 158.1775306 | 177.0369694 | 166.039297  | 0.265085886  | 0.582381731 | 0.2559947 |
| <b>plsY</b> | gi 49175990 ref NC_000913.2 | + | 3202716 | 3203333 | 359.4932911 | 376.1415087 | 345.3481018 | 381.1330069 | 382.4472873 | -0.018190226 | 0.004482212 | 0         |
| <b>tttR</b> | gi 49175990 ref NC_000913.2 | - | 3203346 | 3204278 | 118.2976986 | 132.0619118 | 168.4477663 | 131.5632809 | 198.176247  | -0.420268936 | 0.974130645 | 0.4751425 |
| <b>tttA</b> | gi 49175990 ref NC_000913.2 | + | 3204485 | 3205396 | 24.20290078 | 19.90574998 | 22.53762167 | 20.25866116 | 23.51189076 | 0.019181257  | 0           | 0         |
| <b>tttB</b> | gi 49175990 ref NC_000913.2 | + | 3205393 | 3205998 | 23.4920816  | 11.28981422 | 33.0976521  | 29.24694786 | 33.60758056 | -0.807631037 | 1.895098731 | 1.1216003 |
| <b>tttD</b> | gi 49175990 ref NC_000913.2 | + | 3206046 | 3207509 | 90.9285855  | 112.1507793 | 81.28404689 | 67.63750326 | 115.0271788 | 0.175359909  | 0.379184653 | 0.149598  |
| <b>ygiD</b> | gi 49175990 ref NC_000913.2 | - | 3207552 | 3208565 | 609.452487  | 621.1814996 | 526.7803411 | 521.3807619 | 543.9957231 | 0.210184906  | 0.494829975 | 0.2099578 |
| <b>rpsU</b> | gi 49175990 ref NC_000913.2 | + | 3208803 | 3209018 | 9484.415777 | 9870.458922 | 5405.671596 | 4461.603342 | 7992.638915 | 0.688025237  | 2.222353094 | 1.3728612 |
| <b>dnaG</b> | gi 49175990 ref NC_000913.2 | + | 3209129 | 3210874 | 1804.443544 | 1905.344404 | 1474.899717 | 1788.152214 | 1915.673026 | 0.084621666  | 0.186828007 | 0.0605009 |
| <b>rpoD</b> | gi 49175990 ref NC_000913.2 | + | 3211069 | 3212910 | 2819.85361  | 2870.335471 | 2478.538078 | 2396.040404 | 2796.27101  | 0.149133773  | 0.307635454 | 0.1188375 |
| <b>mug</b>  | gi 49175990 ref NC_000913.2 | - | 3212989 | 3213495 | 372.3796147 | 359.0083398 | 372.2010653 | 330.7755883 | 303.0781805 | 0.138287713  | 0.249875067 | 0.091054  |
| <b>yqiH</b> | gi 49175990 ref NC_000913.2 | - | 3213749 | 3214513 | 162.9661041 | 189.0694991 | 63.30291832 | 69.75298181 | 112.6807774 | 1.068054204  | 4.804882529 | 3.5585801 |
| <b>yqiI</b> | gi 49175990 ref NC_000913.2 | + | 3214801 | 3215424 | 386.3225316 | 365.6488097 | 447.2354305 | 448.4999067 | 469.9458628 | -0.269436626 | 0.680418272 | 0.304768  |
| <b>aer</b>  | gi 49175990 ref NC_000913.2 | - | 3215578 | 3217098 | 636.7016416 | 521.3521905 | 1705.708005 | 1618.890655 | 1425.960462 | -1.417467413 | 9.470806294 | 7.7059899 |
| <b>patA</b> | gi 49175990 ref NC_000913.2 | + | 3217516 | 3218895 | 368.2847036 | 390.3946239 | 395.0145154 | 397.8593703 | 319.9909725 | 0.029077619  | 0.054964776 | 0.0100713 |
| <b>ygiH</b> | gi 49175990 ref NC_000913.2 | - | 3218937 | 3219269 | 29.68590428 | 17.95050175 | 76.9840245  | 60.47585108 | 35.2754906  | -1.200389124 | 3.657420948 | 2.5693596 |
| <b>ebgR</b> | gi 49175990 ref NC_000913.2 | + | 3219488 | 3220471 | 531.1913202 | 544.249084  | 780.8546006 | 951.6953986 | 928.698948  | -0.734628778 | 3.050188036 | 2.0530575 |
| <b>ebgA</b> | gi 49175990 ref NC_000913.2 | + | 3220655 | 3223747 | 215.2595247 | 207.0384416 | 337.3199124 | 325.3251716 | 406.891751  | -0.754010023 | 2.97603577  | 1.9934872 |
| <b>ebgC</b> | gi 49175990 ref NC_000913.2 | + | 3223744 | 3224193 | 22.14452159 | 32.37197045 | 59.32751025 | 57.09402518 | 43.98783282 | -1.000930482 | 2.945990537 | 1.9705614 |
| <b>ygiJ</b> | gi 49175990 ref NC_000913.2 | + | 3224256 | 3225689 | 24.51426483 | 25.64967132 | 41.27842644 | 39.34997466 | 48.09449676 | -0.7774946   | 1.947764648 | 1.1616638 |
| <b>ygiJ</b> | gi 49175990 ref NC_000913.2 | + | 3225823 | 3226893 | 20.91048869 | 18.97480458 | 30.36585927 | 23.71071953 | 31.31733013 | -0.496011117 | 0.887269689 | 0.4234833 |
| <b>ygiK</b> | gi 49175990 ref NC_000913.2 | + | 3226910 | 3229261 | 74.5204553  | 93.15529203 | 111.3986129 | 107.6709625 | 109.9354882 | -0.412991576 | 0.961960076 | 0.4683213 |

|             |                             |   |         |         |             |             |             |             |             |              |             |           |
|-------------|-----------------------------|---|---------|---------|-------------|-------------|-------------|-------------|-------------|--------------|-------------|-----------|
| <b>fadh</b> | gi 49175990 ref NC_000913.2 | + | 3229687 | 3231705 | 173.4794212 | 140.4856628 | 252.4721218 | 254.6308934 | 304.8559514 | -0.762926658 | 2.98556078  | 2.0019867 |
| <b>higA</b> | gi 49175990 ref NC_000913.2 | - | 3231750 | 3232166 | 94.15081712 | 88.30573071 | 68.95253443 | 60.70464    | 73.90934767 | 0.436038777  | 1.106015739 | 0.5613075 |
| <b>higB</b> | gi 49175990 ref NC_000913.2 | - | 3232163 | 3232477 | 46.3187755  | 39.84799297 | 32.23776799 | 41.35495684 | 37.02478825 | 0.234313815  | 0.367021838 | 0.145076  |
| <b>rimG</b> | gi 49175990 ref NC_000913.2 | - | 3232761 | 3233897 | 630.1878041 | 659.1860876 | 393.3672401 | 421.6601827 | 511.173035  | 0.529695098  | 1.930867177 | 1.1485651 |
| <b>ygjP</b> | gi 49175990 ref NC_000913.2 | + | 3233982 | 3234485 | 177.9818471 | 173.80162   | 146.6975664 | 199.2620491 | 169.4201932 | 0.026971395  | 0.053860642 | 0.0094608 |
| <b>ygjQ</b> | gi 49175990 ref NC_000913.2 | + | 3234562 | 3235254 | 32.95921761 | 42.80453688 | 30.64943636 | 25.98286773 | 39.02878588 | 0.218223581  | 0.361969032 | 0.1431209 |
| <b>ygjR</b> | gi 49175990 ref NC_000913.2 | + | 3235333 | 3236319 | 584.6096596 | 529.9459723 | 957.3225445 | 873.3796913 | 787.6847828 | -0.625914657 | 2.542611293 | 1.6381255 |
| <b>alx</b>  | gi 49175990 ref NC_000913.2 | + | 3236602 | 3237567 | 345.8220288 | 339.0698242 | 252.3371577 | 233.4376508 | 304.7916827 | 0.377611679  | 1.035459959 | 0.5189672 |
| <b>sstT</b> | gi 49175990 ref NC_000913.2 | + | 3237966 | 3239210 | 814.5750655 | 818.7358996 | 835.6795678 | 768.1125722 | 830.0406927 | 0.011185136  | 0.018268356 | 0         |
| <b>ygjV</b> | gi 49175990 ref NC_000913.2 | - | 3239215 | 3239766 | 93.3920567  | 92.12258073 | 90.08337256 | 94.05027556 | 76.4771773  | 0.099147999  | 0.155644378 | 0.0487535 |
| <b>uxaA</b> | gi 49175990 ref NC_000913.2 | - | 3239849 | 3241336 | 643.3343596 | 576.4812844 | 1348.173639 | 1237.562966 | 845.2440027 | -0.877653214 | 3.669459846 | 2.5793734 |
| <b>uxaC</b> | gi 49175990 ref NC_000913.2 | - | 3241351 | 3242763 | 608.1167053 | 526.1257328 | 1325.680062 | 1201.737681 | 873.2227106 | -0.965646034 | 4.472197082 | 3.2722158 |
| <b>exuT</b> | gi 49175990 ref NC_000913.2 | + | 3243126 | 3244544 | 287.9462222 | 325.8359555 | 479.2037668 | 554.7268913 | 462.3232295 | -0.720325673 | 2.737660728 | 1.8011016 |
| <b>exuR</b> | gi 49175990 ref NC_000913.2 | + | 3244674 | 3245450 | 1205.034334 | 1257.566917 | 1479.124168 | 1544.765616 | 1275.670704 | -0.222657071 | 0.483599479 | 0.2032863 |
| <b>yqjA</b> | gi 49175990 ref NC_000913.2 | + | 3245795 | 3246457 | 822.2112969 | 811.1286527 | 938.1922116 | 1004.463024 | 953.5121742 | -0.241518243 | 0.565563371 | 0.2463512 |
| <b>mzrA</b> | gi 49175990 ref NC_000913.2 | + | 3246461 | 3246844 | 649.9023094 | 649.6668453 | 785.8412705 | 880.0030213 | 856.971838  | -0.37689183  | 1.092266444 | 0.5534973 |
| <b>yqjC</b> | gi 49175990 ref NC_000913.2 | + | 3246991 | 3247359 | 2244.312183 | 2328.952089 | 2189.407576 | 2475.312266 | 2221.118667 | -0.014372143 | 0.004152716 | 0         |
| <b>yqjD</b> | gi 49175990 ref NC_000913.2 | + | 3247397 | 3247702 | 4048.45989  | 3414.48782  | 3894.863067 | 3784.907517 | 3275.711151 | 0.060701806  | 0.054281947 | 0.0096379 |
| <b>yqjE</b> | gi 49175990 ref NC_000913.2 | + | 3247705 | 3248109 | 3151.044135 | 2754.385603 | 3255.052621 | 2964.273782 | 2517.49116  | 0.048375586  | 0.035154931 | 0.0036811 |
| <b>yqjK</b> | gi 49175990 ref NC_000913.2 | + | 3248099 | 3248398 | 1255.525592 | 1306.005779 | 1331.803067 | 1243.42327  | 1263.111944 | -0.000965351 | 0.005135908 | 0         |
| <b>yqjF</b> | gi 49175990 ref NC_000913.2 | + | 3248584 | 3248976 | 97.95406162 | 148.3274516 | 88.87213249 | 81.96230892 | 93.01904782 | 0.432684591  | 1.286195835 | 0.6848816 |
| <b>yqjG</b> | gi 49175990 ref NC_000913.2 | + | 3249046 | 3250032 | 369.9395579 | 347.5992756 | 302.7522054 | 346.2390685 | 298.5061274 | 0.189483917  | 0.399901847 | 0.1610553 |
| <b>yhaH</b> | gi 49175990 ref NC_000913.2 | + | 3250326 | 3250691 | 285.3158807 | 224.0503314 | 410.2978423 | 310.4467959 | 161.2650368 | -0.145533414 | 0.313053846 | 0.1222592 |
| <b>yhal</b> | gi 49175990 ref NC_000913.2 | + | 3250933 | 3251289 | 41.07970352 | 54.21434448 | 23.74838633 | 50.17103747 | 46.93166356 | 0.185640781  | 0.362314284 | 0.1431584 |
| <b>yhaJ</b> | gi 49175990 ref NC_000913.2 | - | 3251340 | 3252236 | 319.8387342 | 266.8152424 | 265.112984  | 288.9707849 | 205.6586057 | 0.239931285  | 0.442145481 | 0.1811198 |
| <b>yhaK</b> | gi 49175990 ref NC_000913.2 | + | 3252341 | 3253042 | 59.70786836 | 65.56213665 | 57.52111492 | 70.52118182 | 67.26716724 | -0.073399683 | 0.065150462 | 0.015023  |
| <b>yhaL</b> | gi 49175990 ref NC_000913.2 | + | 3253065 | 3253229 | 772.9202766 | 778.8449916 | 1373.527724 | 1127.255584 | 1862.5351   | -0.91175353  | 3.724555772 | 2.6291891 |
| <b>yhaM</b> | gi 49175990 ref NC_000913.2 | - | 3253363 | 3254673 | 215.3314418 | 202.2796378 | 470.3401417 | 475.0990902 | 321.3200692 | -0.998587535 | 4.56348456  | 3.3497695 |
| <b>yhaO</b> | gi 49175990 ref NC_000913.2 | - | 3254701 | 3256032 | 154.7456318 | 145.2921179 | 321.9187813 | 311.5752884 | 253.8102909 | -0.963913138 | 4.395500492 | 3.2038874 |
| <b>tdcG</b> | gi 49175990 ref NC_000913.2 | - | 3256307 | 3257671 | 104.2669102 | 123.5353673 | 1148.236561 | 1231.681809 | 702.8918648 | -3.184758275 | 28.10384587 | 25.095991 |
| <b>tdcF</b> | gi 49175990 ref NC_000913.2 | - | 3257743 | 3258132 | 62.84105687 | 52.18022688 | 679.9910748 | 704.8765426 | 459.3350085 | -3.386062369 | 32.14878018 | 28.839896 |
| <b>tdcE</b> | gi 49175990 ref NC_000913.2 | - | 3258146 | 3260440 | 197.9264336 | 209.9288107 | 3016.245662 | 3198.192119 | 1884.066081 | -3.724584698 | 34.60788796 | 30.997974 |
| <b>tdcD</b> | gi 49175990 ref NC_000913.2 | - | 3260474 | 3261682 | 203.7055919 | 208.9649973 | 1732.494202 | 2056.756733 | 1221.047744 | -3.016722585 | 27.22731783 | 24.316373 |
| <b>tdcC</b> | gi 49175990 ref NC_000913.2 | - | 3261708 | 3263039 | 453.9303625 | 506.2956273 | 3010.347067 | 3645.455948 | 2352.773215 | -2.659802352 | 21.42924968 | 18.722425 |
| <b>tdcB</b> | gi 49175990 ref NC_000913.2 | - | 3263061 | 3264050 | 272.9520134 | 241.1954016 | 1769.471165 | 2860.26368  | 1627.015822 | -3.01476167  | 25.1173983  | 22.285635 |
| <b>tdcA</b> | gi 49175990 ref NC_000913.2 | - | 3264149 | 3265087 | 108.579686  | 105.4139514 | 902.8850811 | 1901.702888 | 1365.202293 | -3.721138245 | 31.72056459 | 28.587771 |
| <b>yhaB</b> | gi 49175990 ref NC_000913.2 | + | 3265876 | 3266415 | 21.45689799 | 20.88644598 | 23.00899783 | 35.60843086 | 24.79360708 | -0.396837625 | 0.560190285 | 0.2440802 |
| <b>garK</b> | gi 49175990 ref NC_000913.2 | - | 3268647 | 3269792 | 153.9098104 | 124.3398845 | 683.0967917 | 435.1675683 | 289.0660216 | -1.690844931 | 8.386309723 | 6.7306378 |
| <b>garR</b> | gi 49175990 ref NC_000913.2 | - | 3269889 | 3270773 | 132.0133146 | 124.3984027 | 631.580051  | 421.6649559 | 277.827373  | -1.750471476 | 8.918989169 | 7.2011694 |
| <b>garL</b> | gi 49175990 ref NC_000913.2 | - | 3270809 | 3271579 | 59.24477725 | 44.55695259 | 400.5374597 | 232.37206   | 181.2472367 | -2.316960199 | 12.87588064 | 10.78448  |
| <b>garP</b> | gi 49175990 ref NC_000913.2 | - | 3271595 | 3272929 | 51.87621978 | 64.6509826  | 480.3937813 | 365.3217469 | 165.8546844 | -2.524692132 | 12.27422228 | 10.31752  |
| <b>garD</b> | gi 49175990 ref NC_000913.2 | + | 3273304 | 3274875 | 203.2822477 | 194.6892759 | 705.9252092 | 489.991338  | 303.6681023 | -1.291239162 | 5.434246058 | 4.1165877 |
| <b>prIF</b> | gi 49175990 ref NC_000913.2 | + | 3275024 | 3275359 | 222.2293388 | 211.7835981 | 195.7869143 | 247.6036404 | 238.8387142 | -0.070968974 | 0.103330951 | 0.0276965 |
| <b>yhaV</b> | gi 49175990 ref NC_000913.2 | + | 3275359 | 3275823 | 280.6858046 | 287.7996328 | 250.0709125 | 279.197607  | 317.1987564 | -0.000981763 | 0.020130171 | 0         |
| <b>agaR</b> | gi 49175990 ref NC_000913.2 | - | 3275878 | 3276687 | 685.6845212 | 723.7776467 | 737.9853333 | 781.4343851 | 810.9240764 | -0.151841318 | 0.291015994 | 0.1118215 |
| <b>kbaZ</b> | gi 49175990 ref NC_000913.2 | + | 3276936 | 3278216 | 77.54978907 | 101.7225023 | 82.36206528 | 91.79159785 | 77.52993126 | 0.060947278  | 0.141463904 | 0.0424335 |
| <b>agaV</b> | gi 49175990 ref NC_000913.2 | + | 3278239 | 3278712 | 33.74867926 | 56.1775477  | 57.89620971 | 39.52676123 | 54.86411097 | -0.222672237 | 0.225449812 | 0.0787822 |
| <b>agaS</b> | gi 49175990 ref NC_000913.2 | + | 3279998 | 3281152 | 38.1716718  | 44.67883647 | 49.0761267  | 59.13828496 | 37.31260538 | -0.243122587 | 0.35652332  | 0.1412357 |
| <b>kbaY</b> | gi 49175990 ref NC_000913.2 | + | 3281165 | 3282025 | 19.38134161 | 21.86310948 | 34.18759705 | 17.22405185 | 40.05503046 | -0.565715547 | 0.881507056 | 0.4186503 |
| <b>agaC</b> | gi 49175990 ref NC_000913.2 | + | 3282707 | 3283510 | 15.63192983 | 8.475259956 | 13.18368476 | 15.55158148 | 8.03663907  | 0.033909346  | 0           | 0         |
| <b>agaD</b> | gi 49175990 ref NC_000913.2 | + | 3283500 | 3284291 | 17.92216728 | 23.79329856 | 14.32325624 | 9.097619269 | 12.32788976 | 0.78702509   | 1.36313631  | 0.738899  |
| <b>agal</b> | gi 49175990 ref NC_000913.2 | + | 3284292 | 3285047 | 17.81268925 | 25.71046836 | 10.87606987 | 13.44362911 | 14.52333369 | 0.702810374  | 1.185495399 | 0.6138036 |
| <b>yraH</b> | gi 49175990 ref NC_000913.2 | + | 3285448 | 3286032 | 80.0281556  | 82.64027294 | 75.2847756  | 103.0561639 | 113.0276617 | -0.274260987 | 0.500868914 | 0.2134435 |
| <b>yral</b> | gi 49175990 ref NC_000913.2 | + | 3286112 | 3286807 | 12.38552435 | 12.38552435 | 16.34567556 | 14.79123651 | 29.90335846 | -0.994807318 | 1.578805264 | 0.883234  |
| <b>yraJ</b> | gi 49175990 ref NC_000913.2 | + | 3286836 | 3289352 | 381.0391184 | 387.5265375 | 390.3006364 | 415.8999107 | 410.5385562 | -0.08283823  | 0.138165951 | 0.0415146 |
| <b>yraK</b> | gi 49175990 ref NC_000913.2 | + | 3289363 | 3290454 | 156.5727388 | 187.1820667 | 125.630715  | 165.7955751 | 170.3123869 | 0.122751405  | 0.2878958   | 0.1098274 |
| <b>rsmI</b> | gi 49175990 ref NC_000913.2 | - | 3290497 | 3291357 | 255.9260518 | 275.4731425 | 238.6384427 | 229.8475476 | 222.1832463 | 0.199489622  | 0.452090401 | 0.1875497 |

|             |                             |   |         |         |             |             |             |             |             |              |             |           |
|-------------|-----------------------------|---|---------|---------|-------------|-------------|-------------|-------------|-------------|--------------|-------------|-----------|
| <b>lpoA</b> | gi 49175990 ref NC_000913.2 | + | 3291422 | 3293458 | 897.0606958 | 948.8843208 | 856.6865364 | 752.4397681 | 802.0544675 | 0.196657038  | 0.468329244 | 0.1963434 |
| <b>yraN</b> | gi 49175990 ref NC_000913.2 | + | 3293416 | 3293811 | 313.5589469 | 315.3357468 | 285.3174892 | 264.7626411 | 312.7891199 | 0.127411226  | 0.25159047  | 0.0917711 |
| <b>diaA</b> | gi 49175990 ref NC_000913.2 | + | 3293831 | 3294421 | 955.2504946 | 970.7109811 | 746.1285923 | 806.1283717 | 882.6144236 | 0.238269064  | 0.604433192 | 0.2677516 |
| <b>yraP</b> | gi 49175990 ref NC_000913.2 | + | 3294431 | 3295006 | 610.7686824 | 612.6257599 | 424.1641854 | 541.3624902 | 548.3458147 | 0.265187979  | 0.684677788 | 0.3069969 |
| <b>yraQ</b> | gi 49175990 ref NC_000913.2 | - | 3295120 | 3296160 | 399.0241629 | 368.4873173 | 440.4499549 | 329.7872074 | 302.076549  | 0.130940807  | 0.184834193 | 0.0595043 |
| <b>yraR</b> | gi 49175990 ref NC_000913.2 | - | 3296233 | 3296868 | 217.0467259 | 175.6252136 | 324.8124456 | 228.9210532 | 209.003502  | -0.324372089 | 0.855731408 | 0.40176   |
| <b>yhbO</b> | gi 49175990 ref NC_000913.2 | + | 3296996 | 3297514 | 174.8729794 | 168.0964383 | 256.114693  | 216.3028083 | 149.7215742 | -0.251713132 | 0.545264712 | 0.2346396 |
| <b>yhbP</b> | gi 49175990 ref NC_000913.2 | - | 3297494 | 3297937 | 226.0544856 | 212.7281205 | 347.6507824 | 246.9211466 | 255.962465  | -0.344719603 | 0.912426832 | 0.4408151 |
| <b>yhbQ</b> | gi 49175990 ref NC_000913.2 | + | 3297988 | 3298290 | 284.8261348 | 261.156717  | 385.6584876 | 355.4283099 | 333.3108199 | -0.373856097 | 1.088043689 | 0.5518476 |
| <b>yhbS</b> | gi 49175990 ref NC_000913.2 | - | 3298277 | 3298780 | 1542.864059 | 1501.635225 | 2668.238001 | 2312.877911 | 1804.212634 | -0.553299913 | 1.683218968 | 0.9681742 |
| <b>yhbT</b> | gi 49175990 ref NC_000913.2 | - | 3298774 | 3299298 | 2119.461117 | 2145.626434 | 4182.991385 | 3317.526866 | 2674.700579 | -0.652896579 | 2.265702896 | 1.4055248 |
| <b>yhbU</b> | gi 49175990 ref NC_000913.2 | + | 3299507 | 3300502 | 497.0265768 | 523.3657865 | 674.7867543 | 539.5595675 | 643.7965863 | -0.280059564 | 0.66437756  | 0.2977686 |
| <b>yhbV</b> | gi 49175990 ref NC_000913.2 | + | 3300511 | 3301389 | 814.7395119 | 780.7211198 | 826.1549773 | 622.6660948 | 870.1859854 | 0.056831848  | 0.080142085 | 0.0199664 |
| <b>yhbW</b> | gi 49175990 ref NC_000913.2 | + | 3301470 | 3302477 | 734.3173956 | 764.6132015 | 799.3215101 | 687.3584977 | 659.7620979 | 0.070230997  | 0.126084966 | 0.0373086 |
| <b>mtr</b>  | gi 49175990 ref NC_000913.2 | - | 3302595 | 3303839 | 442.0274385 | 396.9696617 | 409.7721523 | 347.8167438 | 428.329765  | 0.10343031   | 0.157776623 | 0.0487535 |
| <b>deaD</b> | gi 49175990 ref NC_000913.2 | - | 3303993 | 3305882 | 7920.624737 | 7247.966281 | 8135.329254 | 8196.616214 | 7454.072978 | -0.049216151 | 0.102081872 | 0.0269548 |
| <b>yrbN</b> | gi 49175990 ref NC_000913.2 | - | 3305875 | 3305955 | 391.94839   | 377.0537259 | 365.9606883 | 378.7875852 | 308.7385442 | 0.13942213   | 0.257860284 | 0.0943277 |
| <b>nlpI</b> | gi 49175990 ref NC_000913.2 | - | 3306062 | 3306946 | 9936.112396 | 10637.92076 | 10955.821   | 9960.372652 | 10534.20321 | -0.033686284 | 0.039197157 | 0.004293  |
| <b>pnp</b>  | gi 49175990 ref NC_000913.2 | - | 3307055 | 3309190 | 10525.71693 | 10509.66195 | 14061.57045 | 12747.50803 | 12911.22772 | -0.326997409 | 0.806962605 | 0.371975  |
| <b>rpsO</b> | gi 49175990 ref NC_000913.2 | - | 3309437 | 3309706 | 10911.08863 | 13695.44377 | 7816.962073 | 7692.656517 | 13708.82453 | 0.288575928  | 0.698406265 | 0.1317281 |
| <b>truB</b> | gi 49175990 ref NC_000913.2 | - | 3309855 | 3310799 | 1178.025228 | 1186.313991 | 1212.084668 | 1043.931487 | 1076.944492 | 0.095662913  | 0.173772072 | 0.0547989 |
| <b>rbfA</b> | gi 49175990 ref NC_000913.2 | - | 3310799 | 3311200 | 602.1603956 | 565.1046242 | 694.3883013 | 594.2737441 | 542.051181  | -0.044796224 | 0.105754064 | 0.0283572 |
| <b>infB</b> | gi 49175990 ref NC_000913.2 | - | 3311364 | 3314036 | 6137.090085 | 5159.290204 | 6684.28267  | 5714.482201 | 4741.968571 | 0.021603289  | 0.0207219   | 0         |
| <b>nusA</b> | gi 49175990 ref NC_000913.2 | - | 3314061 | 3315548 | 4277.955029 | 3802.035592 | 4258.365106 | 4201.927985 | 3483.281904 | 0.043539841  | 0.037122231 | 0.0039338 |
| <b>rimP</b> | gi 49175990 ref NC_000913.2 | - | 3315576 | 3316028 | 2344.438684 | 2577.830999 | 2085.847585 | 2235.48933  | 2155.986433 | 0.172507533  | 0.394736026 | 0.1573654 |
| <b>argG</b> | gi 49175990 ref NC_000913.2 | + | 3316659 | 3318002 | 618.0014994 | 568.8956364 | 485.1508521 | 446.244869  | 419.6849886 | 0.415495419  | 1.213898015 | 0.6301081 |
| <b>yhbX</b> | gi 49175990 ref NC_000913.2 | - | 3318010 | 3319635 | 103.2137967 | 113.0571365 | 124.6764621 | 124.4369173 | 120.0786014 | -0.196601931 | 0.359349326 | 0.1424431 |
| <b>secG</b> | gi 49175990 ref NC_000913.2 | - | 3320195 | 3320527 | 14222.99987 | 15839.10935 | 7139.266944 | 8951.343497 | 12182.44178 | 0.638953827  | 2.159461541 | 1.3240641 |
| <b>glmM</b> | gi 49175990 ref NC_000913.2 | - | 3320755 | 3322092 | 2887.729289 | 2658.479171 | 3959.35352  | 3287.31694  | 3115.291805 | -0.293391333 | 0.783473147 | 0.3599897 |
| <b>folP</b> | gi 49175990 ref NC_000913.2 | - | 3322085 | 3322933 | 771.6150107 | 787.3992194 | 921.0554009 | 684.1983411 | 760.6250366 | -0.00667658  | 0.022577583 | 0.0005477 |
| <b>ftsH</b> | gi 49175990 ref NC_000913.2 | - | 3323023 | 3324957 | 10234.77549 | 10361.49807 | 9046.66583  | 8251.741263 | 8669.888897 | 0.252352033  | 0.577380255 | 0.2530904 |
| <b>rlmE</b> | gi 49175990 ref NC_000913.2 | - | 3325057 | 3325686 | 2332.523082 | 2511.33389  | 2537.615787 | 2340.992735 | 2246.968326 | 0.022762017  | 0.048678323 | 0.0081378 |
| <b>yhbY</b> | gi 49175990 ref NC_000913.2 | + | 3325812 | 3326105 | 2244.164956 | 2428.702766 | 2172.673495 | 2280.618028 | 3043.870041 | -0.118588783 | 0.15951002  | 0.049678  |
| <b>greA</b> | gi 49175990 ref NC_000913.2 | - | 3326261 | 3326737 | 909.6638753 | 966.9330876 | 783.6507457 | 845.5245005 | 1117.860371 | 0.015508305  | 0.059762431 | 0.0118829 |
| <b>dacB</b> | gi 49175990 ref NC_000913.2 | + | 3326985 | 3328418 | 509.2008725 | 507.1934396 | 412.9379785 | 416.5010184 | 477.6557237 | 0.219282887  | 0.533680787 | 0.2291177 |
| <b>obgE</b> | gi 49175990 ref NC_000913.2 | - | 3328604 | 3329776 | 1870.937961 | 1546.199676 | 2051.302533 | 1815.035612 | 1339.866616 | 0.018769998  | 0.028343308 | 0.0017411 |
| <b>yhbE</b> | gi 49175990 ref NC_000913.2 | - | 3329792 | 3330757 | 1634.953516 | 1608.019122 | 1399.680203 | 1355.531319 | 1416.716828 | 0.224478995  | 0.502000366 | 0.2138914 |
| <b>rpmA</b> | gi 49175990 ref NC_000913.2 | - | 3330884 | 3331141 | 8857.870648 | 9116.302934 | 6696.709799 | 6650.914898 | 9332.264019 | 0.236433579  | 0.527795226 | 0.2262827 |
| <b>rplU</b> | gi 49175990 ref NC_000913.2 | - | 3331162 | 3331473 | 10236.08758 | 10219.01949 | 7024.538295 | 7538.751685 | 9806.825706 | 0.322041015  | 0.795426741 | 0.3662115 |
| <b>ispB</b> | gi 49175990 ref NC_000913.2 | + | 3331732 | 3332703 | 1757.857264 | 1799.900413 | 1555.287401 | 1617.861054 | 1765.449719 | 0.104181538  | 0.212239543 | 0.0722943 |
| <b>sfsB</b> | gi 49175990 ref NC_000913.2 | + | 3332931 | 3333209 | 183.1147818 | 173.7900471 | 168.3898323 | 178.1084417 | 146.0416871 | 0.129160391  | 0.211743729 | 0.0721266 |
| <b>murA</b> | gi 49175990 ref NC_000913.2 | - | 3333257 | 3334516 | 1598.588024 | 1472.164864 | 1296.898248 | 1074.254881 | 1146.472972 | 0.408954543  | 1.124518734 | 0.5715092 |
| <b>yrbA</b> | gi 49175990 ref NC_000913.2 | - | 3334571 | 3334825 | 285.6359513 | 302.0604311 | 257.6421826 | 196.3781662 | 190.9225264 | 0.457569996  | 1.294607832 | 0.6907314 |
| <b>miaB</b> | gi 49175990 ref NC_000913.2 | - | 3334985 | 3335278 | 922.9679901 | 965.9759035 | 811.9114232 | 791.5687715 | 804.2886274 | 0.22926233   | 0.587430006 | 0.2587763 |
| <b>miaC</b> | gi 49175990 ref NC_000913.2 | - | 3335278 | 3335913 | 1993.972914 | 1972.749637 | 1488.462879 | 1477.640559 | 1395.539392 | 0.45141829   | 1.365081021 | 0.738899  |
| <b>miaD</b> | gi 49175990 ref NC_000913.2 | - | 3335932 | 3336483 | 1365.193672 | 1229.952771 | 1014.040183 | 878.9954683 | 754.1365269 | 0.582652107  | 1.930189764 | 1.1485651 |
| <b>miaE</b> | gi 49175990 ref NC_000913.2 | - | 3336488 | 3337270 | 1625.146488 | 1473.107222 | 1267.888923 | 1273.4385   | 987.4937621 | 0.417256358  | 1.131936247 | 0.5766349 |
| <b>miaF</b> | gi 49175990 ref NC_000913.2 | - | 3337278 | 3338087 | 2069.694603 | 2046.834755 | 1805.229216 | 1755.61761  | 1479.848042 | 0.300136559  | 0.695065266 | 0.3103556 |
| <b>yrbG</b> | gi 49175990 ref NC_000913.2 | + | 3338297 | 3339274 | 793.6748679 | 815.8970528 | 934.1154944 | 922.7667379 | 980.3219187 | -0.237611222 | 0.540320089 | 0.2323307 |
| <b>kdsD</b> | gi 49175990 ref NC_000913.2 | + | 3339288 | 3340274 | 1329.606966 | 1329.606966 | 1391.571338 | 1342.034268 | 1318.102829 | -0.039249772 | 0.075456457 | 0.0183319 |
| <b>kdsC</b> | gi 49175990 ref NC_000913.2 | + | 3340295 | 3340861 | 1058.403531 | 986.8172648 | 981.2708164 | 892.4684655 | 836.9889341 | 0.19514162   | 0.388304853 | 0.1543669 |
| <b>lptC</b> | gi 49175990 ref NC_000913.2 | + | 3340858 | 3341433 | 704.2821962 | 680.9951879 | 632.4320188 | 807.0437264 | 794.0469295 | -0.11083532  | 0.193391346 | 0.062911  |
| <b>lptA</b> | gi 49175990 ref NC_000913.2 | + | 3341402 | 3341959 | 1254.111881 | 1363.015595 | 1321.888885 | 1413.79223  | 1541.083297 | -0.141119089 | 0.233389527 | 0.0827168 |
| <b>lptB</b> | gi 49175990 ref NC_000913.2 | + | 3341966 | 3342691 | 1324.908617 | 1160.603531 | 1286.697996 | 1286.180426 | 1125.313299 | 0.028968508  | 0.014033174 | 0         |
| <b>rpoN</b> | gi 49175990 ref NC_000913.2 | + | 3342739 | 3344172 | 3368.925487 | 3333.829935 | 3731.885177 | 3867.788647 | 3228.603995 | -0.102858172 | 0.193913712 | 0.0631676 |
| <b>hpf</b>  | gi 49175990 ref NC_000913.2 | + | 3344195 | 3344482 | 709.0966472 | 734.2165548 | 710.0683232 | 834.9698432 | 675.4880425 | -0.044564514 | 0.058088585 | 0.0110921 |
| <b>ptsN</b> | gi 49175990 ref NC_000913.2 | + | 3344600 | 3345091 | 824.2659365 | 775.9638232 | 874.8209119 | 830.5978115 | 603.9691554 | 0.074758896  | 0.098286768 | 0.0262976 |

|      |                             |   |         |         |             |             |             |             |               |              |             |           |
|------|-----------------------------|---|---------|---------|-------------|-------------|-------------|-------------|---------------|--------------|-------------|-----------|
| yhbJ | gi 49175990 ref NC_000913.2 | + | 3345137 | 3345991 | 1096.171071 | 1049.517229 | 1094.396917 | 1154.591666 | 942.5223873   | 0.020595961  | 0.02244258  | 0.0005477 |
| npr  | gi 49175990 ref NC_000913.2 | + | 3345988 | 3346260 | 439.5686731 | 468.2818465 | 494.2424033 | 562.81025   | 620.0835934   | -0.317986105 | 0.761463903 | 0.3466185 |
| yrbL | gi 49175990 ref NC_000913.2 | + | 3346474 | 3347106 | 3319.145315 | 3854.405084 | 2419.358201 | 2903.630868 | 2888.344972   | 0.359260926  | 1.114128346 | 0.5667635 |
| mtgA | gi 49175990 ref NC_000913.2 | - | 3347103 | 3347831 | 916.5707267 | 984.034657  | 775.3674282 | 921.4025817 | 856.9999551   | 0.141832467  | 0.33658959  | 0.1327041 |
| elbB | gi 49175990 ref NC_000913.2 | - | 3348482 | 3348481 | 692.2677453 | 674.3499417 | 575.2768475 | 568.2562479 | 437.8481216   | 0.385000239  | 1.033442357 | 0.5177551 |
| arcB | gi 49175990 ref NC_000913.2 | - | 3348711 | 3351047 | 2055.133677 | 2060.138632 | 1995.69141  | 2040.544467 | 2225.374646   | -0.024301652 | 0.027761447 | 0.0014991 |
| yhcC | gi 49175990 ref NC_000913.2 | - | 3351143 | 3352072 | 243.1314668 | 226.0201311 | 429.5974804 | 335.6068857 | 462.9969836   | -0.789494688 | 3.24433952  | 2.2084564 |
| glbB | gi 49175990 ref NC_000913.2 | + | 3352747 | 3357207 | 2647.499876 | 2316.523002 | 2387.357883 | 1946.513004 | 2055.107918   | 0.249460418  | 0.472152418 | 0.1985574 |
| glbD | gi 49175990 ref NC_000913.2 | + | 3357220 | 3358638 | 1037.620375 | 956.4179763 | 991.8352691 | 768.3296148 | 960.0791288   | 0.155779932  | 0.270457985 | 0.100192  |
| glbF | gi 49175990 ref NC_000913.2 | + | 3359198 | 3359962 | 70.77108412 | 87.45104208 | 41.21480723 | 91.38887193 | 68.4123595    | 0.18857794   | 0.398591528 | 0.160299  |
| yhcA | gi 49175990 ref NC_000913.2 | + | 3360134 | 3360808 | 6.415598392 | 4.725057913 | 6.753490009 | 5.699053229 | 9.977213159   | -0.391249797 | 0.235751293 | 0.0837523 |
| yhcD | gi 49175990 ref NC_000913.2 | + | 3360829 | 3363210 | 324.8983052 | 328.6356819 | 261.3914984 | 369.8423379 | 406.8178682   | -0.102164448 | 0.133940747 | 0.039953  |
| insH | gi 49175990 ref NC_000913.2 | - | 3363724 | 3364740 | 833.6323376 | 971.7261942 | 919.6308209 | 959.682603  | 965.7812871   | -0.095458646 | 0.121900104 | 0.0359921 |
| yhcF | gi 49175990 ref NC_000913.2 | + | 3364948 | 3365664 | 124.6120654 | 138.7099296 | 107.2417866 | 163.3733744 | 146.8578527   | -0.109460878 | 0.113686921 | 0.0320463 |
| yhcG | gi 49175990 ref NC_000913.2 | + | 3365849 | 3366976 | 109.177945  | 107.318098  | 111.916521  | 137.7052499 | 121.1934682   | -0.195197465 | 0.362617276 | 0.1431584 |
| yhcH | gi 49175990 ref NC_000913.2 | - | 3367036 | 3367500 | 322.7516841 | 353.3661772 | 733.2530155 | 927.4748656 | 386.7664331   | -1.020290679 | 3.408683379 | 2.3598199 |
| nanK | gi 49175990 ref NC_000913.2 | - | 3367497 | 3368372 | 370.2318962 | 318.1164287 | 842.8558391 | 951.1470279 | 392.4270513   | -1.049537708 | 3.655103471 | 2.5693596 |
| nanE | gi 49175990 ref NC_000913.2 | - | 3368369 | 3369058 | 157.4150991 | 140.5235141 | 422.2047623 | 464.6260104 | 188.2439494   | -1.2378782   | 4.527535666 | 3.3155613 |
| nanT | gi 49175990 ref NC_000913.2 | - | 3369106 | 3370596 | 358.4872803 | 346.6621765 | 1483.827614 | 1796.323784 | 668.4488555   | -1.885666081 | 8.863002569 | 7.1507153 |
| nanA | gi 49175990 ref NC_000913.2 | - | 3370705 | 3371598 | 887.5973479 | 938.4361589 | 3531.093668 | 4070.22034  | 1986.296924   | -1.80720488  | 9.391881971 | 7.6511993 |
| nanR | gi 49175990 ref NC_000913.2 | - | 3371720 | 3372511 | 851.630437  | 900.4436653 | 898.2866335 | 902.5457981 | 924.2790896   | -0.061030548 | 0.086852853 | 0.0222447 |
| dcuD | gi 49175990 ref NC_000913.2 | + | 3372891 | 3374258 | 89.07144828 | 84.51075399 | 121.8375662 | 108.8639629 | 116.6563607   | -0.404899124 | 1.092999899 | 0.553862  |
| sspB | gi 49175990 ref NC_000913.2 | - | 3374301 | 3374798 | 2151.878124 | 2038.265799 | 2229.875192 | 2037.203694 | 2048.359054   | 0.005512314  | 0.006476863 | 0         |
| sspA | gi 49175990 ref NC_000913.2 | - | 3374804 | 3375442 | 3483.022856 | 3558.950861 | 3486.216852 | 3134.819369 | 3162.249165   | 0.112906187  | 0.215874143 | 0.07475   |
| rpsI | gi 49175990 ref NC_000913.2 | - | 3375837 | 3376229 | 9605.781869 | 9417.369545 | 7712.487101 | 7293.255002 | 8954.521225   | 0.252292822  | 0.561401796 | 0.2448499 |
| rplM | gi 49175990 ref NC_000913.2 | - | 3376245 | 3376673 | 6535.929174 | 6458.709844 | 4942.038079 | 4544.182871 | 5260.775564   | 0.404620939  | 1.140204468 | 0.5825992 |
| yhcM | gi 49175990 ref NC_000913.2 | - | 3376892 | 3378019 | 572.394064  | 554.6713896 | 487.0640041 | 486.6366656 | 520.3954445   | 0.181086433  | 0.4019628   | 0.1627105 |
| yhcB | gi 49175990 ref NC_000913.2 | + | 3378213 | 3378611 | 3436.109047 | 3736.596094 | 3819.289112 | 3575.35965  | 3425.902769   | -0.015785281 | 0.009090251 | 0         |
| degQ | gi 49175990 ref NC_000913.2 | + | 3378765 | 3380132 | 609.3603334 | 638.2908437 | 634.6864945 | 571.7362195 | 465.8820901   | 0.166341529  | 0.331139708 | 0.1302079 |
| degS | gi 49175990 ref NC_000913.2 | + | 3380222 | 3381289 | 553.4200706 | 543.2796041 | 442.1650021 | 455.2610408 | 511.3239818   | 0.221981309  | 0.534518857 | 0.2297408 |
| mdh  | gi 49175990 ref NC_000913.2 | - | 3381352 | 3382290 | 4976.116873 | 4883.918685 | 5324.026225 | 5008.250886 | 5290.070455   | -0.074507098 | 0.133576961 | 0.0399341 |
| argR | gi 49175990 ref NC_000913.2 | + | 3382725 | 3383195 | 768.6240419 | 900.4925107 | 803.3472745 | 714.6304682 | 1187.173982   | -0.142569325 | 0.184487885 | 0.0593542 |
| yhcN | gi 49175990 ref NC_000913.2 | + | 3383560 | 3383823 | 1596.52644  | 1848.400448 | 715.9692065 | 840.8504222 | 945.3238533   | 1.014217665  | 5.768270205 | 4.398905  |
| yhcO | gi 49175990 ref NC_000913.2 | - | 3383879 | 3384151 | 195.1845277 | 180.4278507 | 166.7955979 | 162.4800048 | 134.8534788   | 0.295680137  | 0.623825981 | 0.2784933 |
| aaeB | gi 49175990 ref NC_000913.2 | - | 3384243 | 3386210 | 123.3609676 | 111.929051  | 142.1298149 | 117.8808446 | 106.049548941 | 0.049548941  | 0.108608379 | 0.0294058 |
| aaeA | gi 49175990 ref NC_000913.2 | - | 3386216 | 3387148 | 148.550147  | 133.8789304 | 127.9201525 | 152.3720684 | 150.2363615   | -0.01712291  | 0.025906248 | 0.000968  |
| aaeX | gi 49175990 ref NC_000913.2 | - | 3387156 | 3387359 | 56.28630091 | 52.21321468 | 44.50486396 | 63.71206476 | 58.27467739   | -0.035783029 | 0.029100362 | 0.0017515 |
| aaeR | gi 49175990 ref NC_000913.2 | + | 3387542 | 3388471 | 429.4231175 | 464.4895459 | 473.7543708 | 533.4323342 | 435.4466159   | -0.117553541 | 0.195012231 | 0.0639399 |
| tlbD | gi 49175990 ref NC_000913.2 | - | 3388605 | 3390050 | 1944.180378 | 1892.957787 | 1843.369169 | 1762.268643 | 1302.797543   | 0.243392281  | 0.482148114 | 0.2027933 |
| yhdP | gi 49175990 ref NC_000913.2 | - | 3390480 | 3394280 | 1810.36584  | 1783.735136 | 1637.120914 | 1557.36214  | 1652.271562   | 0.156767983  | 0.312039774 | 0.1218549 |
| rng  | gi 49175990 ref NC_000913.2 | - | 3394348 | 3395817 | 1210.374644 | 1161.596065 | 1090.712965 | 1095.402739 | 1150.82951    | 0.096941479  | 0.181969554 | 0.0582021 |
| yhdE | gi 49175990 ref NC_000913.2 | - | 3395807 | 3396400 | 683.857038  | 588.8107199 | 749.5443153 | 704.1949997 | 764.9549326   | -0.194808351 | 0.498175221 | 0.2119253 |
| mreD | gi 49175990 ref NC_000913.2 | - | 3396409 | 3396897 | 675.1693253 | 669.6092175 | 633.3166847 | 663.7944102 | 755.8208933   | -0.029772774 | 0.037791105 | 0.0039876 |
| mreC | gi 49175990 ref NC_000913.2 | - | 3396897 | 3398000 | 1719.995647 | 1761.908151 | 1553.741813 | 1408.418893 | 1792.231722   | 0.130642712  | 0.262821349 | 0.0969211 |
| mreB | gi 49175990 ref NC_000913.2 | - | 3398066 | 3399109 | 2268.988659 | 2309.946589 | 1974.338966 | 1890.408772 | 2201.764328   | 0.17472203   | 0.368992489 | 0.1454051 |
| csrD | gi 49175990 ref NC_000913.2 | - | 3399414 | 3401354 | 1447.197224 | 1572.924149 | 1202.884626 | 1531.272896 | 1462.645744   | 0.087476638  | 0.210012805 | 0.0715429 |
| yhdH | gi 49175990 ref NC_000913.2 | + | 3401506 | 3402480 | 423.1954836 | 446.4315951 | 644.6951931 | 573.1187009 | 678.4933025   | -0.545497365 | 1.808423447 | 0.1576473 |
| accB | gi 49175990 ref NC_000913.2 | + | 3403458 | 3403928 | 1314.115035 | 1172.959789 | 1063.119311 | 1115.588249 | 1226.999527   | 0.142774528  | 0.270036632 | 0.0999284 |
| accC | gi 49175990 ref NC_000913.2 | + | 3403939 | 3405288 | 2869.094611 | 2901.676131 | 2601.729364 | 2309.822565 | 2890.455323   | 0.14832155   | 0.294074541 | 0.1132093 |
| yhdT | gi 49175990 ref NC_000913.2 | + | 3405397 | 3405639 | 101.4117636 | 107.3453021 | 61.23078341 | 58.43686473 | 72.72410248   | 0.692453592  | 2.46266019  | 1.5720771 |
| panF | gi 49175990 ref NC_000913.2 | + | 3405629 | 3407080 | 328.6567952 | 335.2881598 | 311.677258  | 280.4594408 | 321.8282436   | 0.122971541  | 0.242816436 | 0.0878992 |
| prmA | gi 49175990 ref NC_000913.2 | + | 3407092 | 3407973 | 336.302979  | 335.2779573 | 325.3673829 | 347.5382683 | 356.6380482   | -0.034688557 | 0.047222514 | 0.0075492 |
| dusB | gi 49175990 ref NC_000913.2 | + | 3408302 | 3409267 | 2734.883079 | 3135.391114 | 1804.20352  | 2124.69054  | 2770.112057   | 0.359756334  | 0.99948494  | 0.4923471 |
| fis  | gi 49175990 ref NC_000913.2 | + | 3409293 | 3409589 | 735.4039023 | 806.4294188 | 354.9902585 | 572.367033  | 773.1698873   | 0.39790118   | 1.066453191 | 0.5346329 |
| yhdJ | gi 49175990 ref NC_000913.2 | + | 3409675 | 3410559 | 60.69093079 | 41.68428961 | 45.79734776 | 56.07624811 | 67.04644218   | -0.106818627 | 0.192336717 | 0.062551  |
| yhdU | gi 49175990 ref NC_000913.2 | + | 3410643 | 3410822 | 26.53431244 | 38.0743685  | 17.32518682 | 44.6281249  | 48.9944588    | -0.265202872 | 0.224729838 | 0.0784098 |
| envR | gi 49175990 ref NC_000913.2 | - | 3410825 | 3411487 | 12.23360834 | 8.505577743 | 9.672685611 | 15.58710529 | 13.44973844   | -0.290668491 | 0.282060851 | 0.1071941 |

|      |                             |   |         |         |             |             |             |             |             |              |             |           |
|------|-----------------------------|---|---------|---------|-------------|-------------|-------------|-------------|-------------|--------------|-------------|-----------|
| acrE | gi 49175990 ref NC_000913.2 | + | 3411886 | 3413043 | 26.81607406 | 32.33146331 | 29.5350137  | 32.55092826 | 37.9985768  | -0.198015585 | 0.213312393 | 0.07322   |
| acrF | gi 49175990 ref NC_000913.2 | + | 3413055 | 3416159 | 190.9615473 | 204.2333102 | 187.1593762 | 181.7148527 | 199.5736657 | 0.050866271  | 0.095564153 | 0.025393  |
| yhdV | gi 49175990 ref NC_000913.2 | + | 3416412 | 3416633 | 7.535887652 | 7.594538163 | 18.77175573 | 20.20121008 | 22.36982834 | -1.423052834 | 3.021914053 | 2.0321357 |
| yhdX | gi 49175990 ref NC_000913.2 | + | 3418156 | 3419337 | 47.54566033 | 41.75239352 | 42.32260602 | 34.91820144 | 43.65646225 | 0.16599216   | 0.224352667 | 0.078182  |
| yhdY | gi 49175990 ref NC_000913.2 | + | 3419347 | 3420450 | 46.38828311 | 53.22486304 | 31.28035545 | 37.13197306 | 55.66611531 | 0.237916731  | 0.441408569 | 0.180966  |
| yhdZ | gi 49175990 ref NC_000913.2 | + | 3420458 | 3421216 | 75.97080208 | 67.39357754 | 54.5375759  | 59.35575443 | 55.00709129 | 0.360986641  | 0.748652221 | 0.3398617 |
| yrdB | gi 49175990 ref NC_000913.2 | + | 3427258 | 3427812 | 1369.293821 | 1349.671397 | 1316.150517 | 1319.596013 | 1321.408754 | 0.045490362  | 0.078451973 | 0.0192386 |
| yrdB | gi 49175990 ref NC_000913.2 | - | 3427788 | 3428045 | 669.7724574 | 611.6327817 | 592.7330177 | 579.5678711 | 510.5947307 | 0.2088401    | 0.423779353 | 0.1736222 |
| aroE | gi 49175990 ref NC_000913.2 | - | 3428042 | 3428860 | 807.1110444 | 655.2707436 | 816.9179285 | 716.1591148 | 393.4113908 | 0.23720148   | 0.333083466 | 0.1312548 |
| rimN | gi 49175990 ref NC_000913.2 | - | 3428865 | 3429437 | 547.1068759 | 537.5811646 | 479.5034255 | 468.4101611 | 320.2050438 | 0.372086226  | 0.957633088 | 0.4664401 |
| yrdD | gi 49175990 ref NC_000913.2 | - | 3429442 | 3429984 | 948.3631687 | 948.8579644 | 977.7327702 | 1052.55207  | 860.6192563 | -0.021593351 | 0.032350848 | 0.0030156 |
| smg  | gi 49175990 ref NC_000913.2 | - | 3430013 | 3430486 | 1258.795084 | 1267.047769 | 1533.015859 | 1542.427155 | 1061.678281 | -0.119183765 | 0.226166065 | 0.0788232 |
| smf  | gi 49175990 ref NC_000913.2 | - | 3430458 | 3431582 | 1058.776139 | 1058.108761 | 1273.511233 | 1357.494326 | 1087.24666  | -0.266876085 | 0.628184257 | 0.2809582 |
| def  | gi 49175990 ref NC_000913.2 | + | 3431712 | 3432221 | 1215.204431 | 1241.40991  | 1217.694151 | 1160.408736 | 1125.192499 | 0.073197858  | 0.138437587 | 0.0415146 |
| fmt  | gi 49175990 ref NC_000913.2 | + | 3432236 | 3433183 | 2113.722957 | 2176.028521 | 2210.02752  | 2148.072627 | 1950.872099 | 0.028228785  | 0.048908099 | 0.0081378 |
| rsmB | gi 49175990 ref NC_000913.2 | + | 3433229 | 3434518 | 906.5234928 | 799.6790505 | 970.7067021 | 919.3005614 | 811.2448847 | -0.054116317 | 0.135392855 | 0.0404245 |
| trkA | gi 49175990 ref NC_000913.2 | + | 3434540 | 3435916 | 799.6989314 | 743.6646031 | 920.7265489 | 784.721021  | 559.1883264 | 0.058918562  | 0.05328673  | 0.0091021 |
| mscL | gi 49175990 ref NC_000913.2 | + | 3436046 | 3436456 | 905.4725485 | 901.3649891 | 1234.503777 | 1127.843921 | 967.2324402 | -0.287522844 | 0.728177231 | 0.3261664 |
| arfA | gi 49175990 ref NC_000913.2 | - | 3436453 | 3436671 | 109.7063297 | 112.0814434 | 142.9271707 | 131.2012671 | 123.5223524 | -0.254012923 | 0.562558712 | 0.2455646 |
| zntR | gi 49175990 ref NC_000913.2 | - | 3436727 | 3437152 | 234.2066243 | 224.1327576 | 205.082014  | 251.0393276 | 258.954181  | -0.060744198 | 0.086930356 | 0.0222447 |
| yhdN | gi 49175990 ref NC_000913.2 | - | 3437163 | 3437531 | 253.6145934 | 312.5760613 | 268.2367788 | 273.6087582 | 294.9064175 | -0.009961983 | 0.032752254 | 0.0030156 |
| rplQ | gi 49175990 ref NC_000913.2 | - | 3437638 | 3438021 | 11088.36163 | 11738.74703 | 7562.372906 | 6024.384542 | 9179.770452 | 0.580276171  | 1.869003575 | 1.1023219 |
| rpoA | gi 49175990 ref NC_000913.2 | - | 3438062 | 3439051 | 28947.36489 | 27503.66941 | 20412.75749 | 16782.75791 | 21862.34018 | 0.530180898  | 1.556941815 | 0.8707894 |
| rpsD | gi 49175990 ref NC_000913.2 | - | 3439077 | 3439697 | 16082.46462 | 15423.96828 | 12949.75102 | 10690.39786 | 12805.59694 | 0.386117996  | 0.979167146 | 0.4786629 |
| rpsK | gi 49175990 ref NC_000913.2 | - | 3439731 | 3440120 | 7322.73465  | 7345.841327 | 6067.999    | 5101.44444  | 5811.65094  | 0.378964527  | 1.001052682 | 0.493572  |
| rpsM | gi 49175990 ref NC_000913.2 | - | 3440137 | 3440493 | 17967.85506 | 17439.47459 | 13516.35089 | 11459.47557 | 13561.64171 | 0.471196049  | 1.345890514 | 0.7280876 |
| rpmJ | gi 49175990 ref NC_000913.2 | - | 3440640 | 3440756 | 7658.366492 | 7815.05668  | 7110.528636 | 6917.744999 | 9534.227665 | -0.032021642 | 0.02819932  | 0.0017104 |
| secY | gi 49175990 ref NC_000913.2 | - | 3440788 | 3442119 | 30852.29662 | 29827.86718 | 27362.9197  | 20902.95662 | 25030.32555 | 0.32680728   | 0.732616553 | 0.3287846 |
| rplO | gi 49175990 ref NC_000913.2 | - | 3442127 | 3442561 | 9343.664962 | 8248.100849 | 9109.300488 | 5736.059518 | 4702.940361 | 0.482223554  | 0.995843968 | 0.4899061 |
| rpmD | gi 49175990 ref NC_000913.2 | - | 3442565 | 3442744 | 4389.131438 | 4497.366245 | 4238.386836 | 2881.644119 | 2800.20767  | 0.444800554  | 1.147133552 | 0.5877497 |
| rpsE | gi 49175990 ref NC_000913.2 | - | 3442748 | 3443251 | 6980.131721 | 5831.753953 | 7020.585563 | 4792.083218 | 4749.753118 | 0.261691922  | 0.425830615 | 0.1744221 |
| rplR | gi 49175990 ref NC_000913.2 | - | 3443266 | 3443619 | 4896.669169 | 4728.141665 | 5290.941896 | 3986.998475 | 3814.195717 | 0.162839913  | 0.267079219 | 0.0982312 |
| rplF | gi 49175990 ref NC_000913.2 | - | 3443629 | 3444162 | 10969.61167 | 10078.40713 | 10546.10884 | 8073.542908 | 7546.226131 | 0.299661829  | 0.603179033 | 0.2674799 |
| rpsH | gi 49175990 ref NC_000913.2 | - | 3444175 | 3444567 | 10962.5154  | 8840.740895 | 9795.001943 | 6986.132759 | 6990.92921  | 0.370810216  | 0.728688893 | 0.3264089 |
| rpsN | gi 49175990 ref NC_000913.2 | - | 3444906 | 3444906 | 9433.365593 | 8105.616313 | 7449.615887 | 5269.737195 | 5940.818785 | 0.532930902  | 1.423389781 | 0.7750308 |
| rplE | gi 49175990 ref NC_000913.2 | - | 3444921 | 3445460 | 15520.79748 | 15199.82287 | 13819.55053 | 10961.64744 | 11368.91732 | 0.364755731  | 0.88005933  | 0.4178212 |
| rplX | gi 49175990 ref NC_000913.2 | - | 3445475 | 3445789 | 6975.676561 | 7011.508557 | 6176.165312 | 4642.949655 | 5053.526952 | 0.414930643  | 1.091379177 | 0.5533468 |
| rplN | gi 49175990 ref NC_000913.2 | - | 3445800 | 3446171 | 20995.96935 | 20741.97861 | 17091.97126 | 14026.9892  | 18349.06376 | 0.344495916  | 0.826452223 | 0.3838551 |
| rpsQ | gi 49175990 ref NC_000913.2 | - | 3446336 | 3446590 | 10963.03118 | 10855.38935 | 7318.447032 | 6403.218746 | 9002.589359 | 0.525106756  | 1.590417291 | 0.8916605 |
| rpmC | gi 49175990 ref NC_000913.2 | - | 3446590 | 3446781 | 11427.28312 | 9951.106795 | 6450.869597 | 4626.239648 | 5659.124325 | 0.970346693  | 4.105645209 | 2.9505757 |
| rplP | gi 49175990 ref NC_000913.2 | - | 3446781 | 3447191 | 15947.09701 | 14090.3932  | 9052.829518 | 7136.368023 | 8116.873414 | 0.91748637   | 3.938423441 | 2.7970192 |
| rpsC | gi 49175990 ref NC_000913.2 | - | 3447204 | 3447905 | 15202.41846 | 13792.16494 | 9354.213307 | 7198.13484  | 9333.763443 | 0.769257871  | 2.872748024 | 1.9121685 |
| rplV | gi 49175990 ref NC_000913.2 | - | 3447923 | 3448255 | 10987.97375 | 9921.679887 | 6605.164712 | 5071.306982 | 6400.476347 | 0.817279518  | 3.170486884 | 2.1235885 |
| rpsS | gi 49175990 ref NC_000913.2 | - | 3448270 | 3448548 | 10291.77447 | 9831.474874 | 7662.943538 | 6635.177158 | 7863.211997 | 0.45535548   | 1.279835063 | 0.6802206 |
| rplB | gi 49175990 ref NC_000913.2 | - | 3448565 | 3449386 | 12898.41605 | 12414.96645 | 10155.38504 | 7722.808704 | 9570.535444 | 0.482319325  | 1.36293808  | 0.738899  |
| rplW | gi 49175990 ref NC_000913.2 | - | 3449404 | 3449706 | 6481.168441 | 6166.149455 | 4867.059022 | 3506.27781  | 4763.804857 | 0.546114656  | 1.62919548  | 0.9239966 |
| rplD | gi 49175990 ref NC_000913.2 | - | 3449703 | 3450308 | 11563.99994 | 10670.1419  | 9010.368242 | 6735.09837  | 8426.367245 | 0.485356563  | 1.343385229 | 0.7266489 |
| rplC | gi 49175990 ref NC_000913.2 | - | 3450319 | 3450948 | 14122.70894 | 13044.67172 | 10784.53646 | 8386.55911  | 11171.10817 | 0.442231745  | 1.160487295 | 0.5951126 |
| rpsJ | gi 49175990 ref NC_000913.2 | - | 3450981 | 3451292 | 6393.223817 | 6494.816162 | 5464.950184 | 4517.5371   | 6809.530023 | 0.199139891  | 0.408787365 | 0.1666015 |
| gspB | gi 49175990 ref NC_000913.2 | - | 3451530 | 3451949 | 18.89251215 | 18.89262747 | 9.923223421 | 16.79709991 | 21.10239551 | 0.229015111  | 0.24762129  | 0.0904131 |
| gspA | gi 49175990 ref NC_000913.2 | - | 3451951 | 3453420 | 42.54825357 | 36.04659752 | 40.4924799  | 63.56416116 | 47.20944397 | -0.352246806 | 0.651424879 | 0.2917747 |
| gspC | gi 49175990 ref NC_000913.2 | + | 3453600 | 3454415 | 37.30816289 | 49.4633706  | 31.7152246  | 57.01044514 | 61.40541676 | -0.259355743 | 0.294567572 | 0.113293  |
| gspD | gi 49175990 ref NC_000913.2 | + | 3454399 | 3456351 | 121.7131085 | 123.4767018 | 113.6246354 | 136.8023988 | 162.3248808 | -0.179931258 | 0.296425781 | 0.1143219 |
| gspE | gi 49175990 ref NC_000913.2 | + | 3456361 | 3457842 | 32.7949718  | 46.6295517  | 37.5367242  | 43.69877722 | 45.90085262 | -0.138156479 | 0.112182161 | 0.0331129 |
| gspF | gi 49175990 ref NC_000913.2 | + | 3457839 | 3459035 | 70.85348062 | 84.58932317 | 88.07115764 | 98.67505927 | 109.7522263 | -0.374675648 | 0.788598025 | 0.3620573 |
| gspG | gi 49175990 ref NC_000913.2 | + | 3459045 | 3459482 | 19.08939507 | 16.1153475  | 15.15682223 | 16.96959498 | 29.9211775  | -0.228210973 | 0.230884989 | 0.0815678 |
| gspH | gi 49175990 ref NC_000913.2 | + | 3459490 | 3459999 | 8.158982323 | 18.14982437 | 11.01503923 | 18.87526314 | 13.51468843 | -0.219510986 | 0.082300778 | 0.0207758 |

|             |                             |   |         |         |              |             |             |             |             |              |             |           |
|-------------|-----------------------------|---|---------|---------|--------------|-------------|-------------|-------------|-------------|--------------|-------------|-----------|
| <b>gspI</b> | gi 49175990 ref NC_000913.2 | + | 3459996 | 3460373 | 12.9972439   | 7.539204589 | 7.087277716 | 11.2119106  | 14.42762044 | -0.05552774  | 0.060367273 | 0.0118829 |
| <b>gspJ</b> | gi 49175990 ref NC_000913.2 | + | 3460366 | 3460953 | 26.67126992  | 35.20325061 | 43.75246585 | 39.351604   | 45.91690514 | -0.500932099 | 0.959014554 | 0.4666554 |
| <b>gspK</b> | gi 49175990 ref NC_000913.2 | + | 3460946 | 3461929 | 55.71184569  | 67.4927974  | 59.53044806 | 53.88731857 | 56.10555812 | 0.105858332  | 0.175633816 | 0.055256  |
| <b>gspL</b> | gi 49175990 ref NC_000913.2 | + | 3461944 | 3463107 | 100.55570721 | 115.9257764 | 147.2227979 | 129.1414881 | 159.1146379 | -0.439691582 | 1.134526992 | 0.578459  |
| <b>gspM</b> | gi 49175990 ref NC_000913.2 | + | 3463104 | 3463565 | 40.15483044  | 44.66541239 | 48.17990819 | 63.67262299 | 50.57843451 | -0.369384018 | 0.689943585 | 0.3092004 |
| <b>gspO</b> | gi 49175990 ref NC_000913.2 | + | 3463565 | 3464242 | 158.5654472  | 147.1871786 | 143.1018215 | 211.6162129 | 198.40976   | -0.276226122 | 0.555145533 | 0.2405783 |
| <b>bfr</b>  | gi 49175990 ref NC_000913.2 | - | 3464271 | 3464747 | 799.4637189  | 795.9359529 | 718.076788  | 1372.512218 | 900.97994   | -0.342811488 | 0.6755756   | 0.3029535 |
| <b>bfd</b>  | gi 49175990 ref NC_000913.2 | - | 3464819 | 3465013 | 93.79467757  | 78.77070606 | 31.74885976 | 35.7042407  | 23.77848434 | 1.52594399   | 7.517392195 | 5.9528008 |
| <b>chiA</b> | gi 49175990 ref NC_000913.2 | - | 3465182 | 3467875 | 413.2008206  | 422.6722445 | 424.9848442 | 479.7518192 | 466.6064305 | -0.137580593 | 0.253320879 | 0.0923968 |
| <b>tufA</b> | gi 49175990 ref NC_000913.2 | - | 3468167 | 3469351 | 49525.75824  | 45028.62454 | 43526.24324 | 35272.5046  | 35522.12157 | 0.336052567  | 0.731272298 | 0.3283671 |
| <b>fusA</b> | gi 49175990 ref NC_000913.2 | - | 3469422 | 3471536 | 51869.08537  | 50018.96387 | 38071.12289 | 31486.46177 | 35546.60589 | 0.552225943  | 1.695052815 | 0.9766759 |
| <b>rpsG</b> | gi 49175990 ref NC_000913.2 | - | 3471564 | 3472103 | 9997.046885  | 9682.361106 | 6913.07515  | 5346.003125 | 6959.041571 | 0.630052957  | 2.095641494 | 1.2731876 |
| <b>rpsL</b> | gi 49175990 ref NC_000913.2 | - | 3472200 | 3472574 | 8278.210196  | 9545.673954 | 5614.790219 | 4891.879343 | 6524.776744 | 0.628955355  | 2.263651538 | 1.4050162 |
| <b>tusB</b> | gi 49175990 ref NC_000913.2 | - | 3472700 | 3472987 | 280.5014478  | 304.9220265 | 284.2433664 | 313.8363773 | 302.8609495 | -0.052234639 | 0.056538605 | 0.0106306 |
| <b>tusC</b> | gi 49175990 ref NC_000913.2 | - | 3472995 | 3473354 | 232.9143234  | 225.0866855 | 222.6899899 | 230.8039933 | 187.5780858 | 0.107618748  | 0.176510749 | 0.0558515 |
| <b>tusD</b> | gi 49175990 ref NC_000913.2 | - | 3473354 | 3473740 | 371.4835319  | 388.4888898 | 372.2221828 | 373.1163417 | 264.0548931 | 0.177203653  | 0.353926813 | 0.1403861 |
| <b>yheO</b> | gi 49175990 ref NC_000913.2 | - | 3473740 | 3474462 | 64.1276058   | 603.0979668 | 674.6181816 | 669.0896945 | 468.2518954 | 0.060391198  | 0.072447379 | 0.1013854 |
| <b>fkpA</b> | gi 49175990 ref NC_000913.2 | - | 3474629 | 3475441 | 2757.315694  | 2861.79661  | 2375.937533 | 2929.525437 | 3353.606393 | -0.057974254 | 0.05840868  | 0.0110921 |
| <b>slyX</b> | gi 49175990 ref NC_000913.2 | + | 3475662 | 3475880 | 543.0009444  | 587.0155655 | 321.6382213 | 272.9224773 | 473.7658583 | 0.647693512  | 2.261265715 | 1.4041677 |
| <b>slyD</b> | gi 49175990 ref NC_000913.2 | - | 3475929 | 3476519 | 5782.897148  | 6124.409953 | 7141.64091  | 6282.015322 | 7544.603379 | -0.237999232 | 0.486661578 | 0.2053306 |
| <b>yheV</b> | gi 49175990 ref NC_000913.2 | - | 3476614 | 3476814 | 107.1658198  | 110.1841358 | 148.992988  | 127.7767942 | 97.97016592 | -0.190613769 | 0.36237404  | 0.1431584 |
| <b>kefB</b> | gi 49175990 ref NC_000913.2 | - | 3476824 | 3478629 | 249.3677786  | 237.4278187 | 352.4080617 | 361.8792337 | 253.9533847 | -0.39338832  | 1.058036478 | 0.5287486 |
| <b>kefG</b> | gi 49175990 ref NC_000913.2 | - | 3478629 | 3479183 | 184.7700289  | 189.9695357 | 272.7765331 | 272.2451524 | 198.9453349 | -0.400417731 | 1.021314351 | 0.5107352 |
| <b>yheS</b> | gi 49175990 ref NC_000913.2 | + | 3479311 | 3481224 | 105.071304   | 959.2614683 | 898.1217536 | 825.3207098 | 928.6901978 | 0.202046267  | 0.413547059 | 0.1691072 |
| <b>yheT</b> | gi 49175990 ref NC_000913.2 | + | 3481224 | 3482246 | 311.3701448  | 282.0470205 | 265.1878207 | 258.9754578 | 245.7559808 | 0.225310804  | 0.459809891 | 0.1927128 |
| <b>yheU</b> | gi 49175990 ref NC_000913.2 | + | 3482240 | 3482458 | 212.226482   | 241.3028295 | 323.4241112 | 290.4907859 | 304.0130378 | -0.445033774 | 1.240251941 | 0.6494538 |
| <b>prkB</b> | gi 49175990 ref NC_000913.2 | + | 3482512 | 3483381 | 620.1718498  | 633.5301071 | 780.1223747 | 801.5591871 | 751.6473837 | -0.31390482  | 0.83418265  | 0.3895126 |
| <b>yhfA</b> | gi 49175990 ref NC_000913.2 | - | 3483436 | 3483840 | 563.5480438  | 548.0243299 | 710.4820181 | 658.0591708 | 552.2025794 | -0.191710348 | 0.439960344 | 0.1050178 |
| <b>crp</b>  | gi 49175990 ref NC_000913.2 | + | 3484142 | 3484774 | 3853.491924  | 4621.869073 | 4955.187732 | 4658.451929 | 4905.321133 | -0.216241277 | 0.389612748 | 0.1548204 |
| <b>yhfK</b> | gi 49175990 ref NC_000913.2 | + | 3484813 | 3486915 | 1564.648273  | 1659.345192 | 2061.864169 | 2030.477188 | 2202.978803 | -0.390233567 | 0.986858448 | 0.4831349 |
| <b>argD</b> | gi 49175990 ref NC_000913.2 | - | 3486982 | 3488202 | 233.671166   | 265.999145  | 281.2438537 | 260.2512555 | 294.9050659 | -0.175011613 | 0.312162696 | 0.1218549 |
| <b>pabA</b> | gi 49175990 ref NC_000913.2 | - | 3488288 | 3488851 | 84.52307851  | 84.52894186 | 77.96355832 | 84.93579212 | 53.1089988  | 0.236787685  | 0.428040992 | 0.1754896 |
| <b>fic</b>  | gi 49175990 ref NC_000913.2 | - | 3488883 | 3489485 | 429.3742375  | 389.3749493 | 568.8535705 | 469.6551452 | 301.2959774 | -0.091303825 | 0.20472419  | 0.0682967 |
| <b>yhfG</b> | gi 49175990 ref NC_000913.2 | - | 3489475 | 3489642 | 276.6235509  | 309.6841272 | 296.8336971 | 298.0833227 | 239.2212884 | 0.065889138  | 0.136976954 | 0.0413446 |
| <b>ppiA</b> | gi 49175990 ref NC_000913.2 | - | 3489747 | 3490319 | 837.8137975  | 869.0908135 | 725.2377253 | 535.2259588 | 747.9388503 | 0.651484278  | 0.970648071 | 0.4733387 |
| <b>tsgA</b> | gi 49175990 ref NC_000913.2 | + | 3490590 | 3491771 | 559.7508817  | 546.1262173 | 440.3244541 | 467.3229543 | 374.9302835 | 0.376811544  | 1.085569186 | 0.5501055 |
| <b>nirB</b> | gi 49175990 ref NC_000913.2 | + | 3492033 | 3494576 | 13319.51775  | 12054.00829 | 11221.65117 | 3635.89475  | 9754.149667 | 0.672522937  | 1.357072574 | 0.7355514 |
| <b>nirD</b> | gi 49175990 ref NC_000913.2 | + | 3494573 | 3494899 | 1918.168258  | 1627.895661 | 1576.725355 | 522.3417732 | 1008.507987 | 0.839430588  | 2.040992845 | 1.2290381 |
| <b>nirC</b> | gi 49175990 ref NC_000913.2 | + | 3495025 | 3495831 | 1678.687964  | 1562.401935 | 845.1120557 | 320.5836187 | 913.4753695 | 1.25244362   | 4.502137152 | 3.2953433 |
| <b>cysG</b> | gi 49175990 ref NC_000913.2 | + | 3495850 | 3497223 | 2140.765975  | 1892.912091 | 1381.163463 | 713.8497299 | 1340.080544 | 0.850310071  | 2.777939641 | 1.8336062 |
| <b>yhfL</b> | gi 49175990 ref NC_000913.2 | + | 3497470 | 3497637 | 84.19756347  | 95.97315046 | 59.13656486 | 21.95123953 | 71.23458172 | 0.819296799  | 2.017361509 | 1.2109042 |
| <b>friA</b> | gi 49175990 ref NC_000913.2 | + | 3497932 | 3499269 | 12.39975609  | 15.22104653 | 9.864418823 | 17.83831316 | 17.84689043 | -0.170363565 | 0.0987655   | 0.0262976 |
| <b>friB</b> | gi 49175990 ref NC_000913.2 | + | 3499290 | 3500312 | 63.84716132  | 78.90040102 | 96.42905346 | 72.03859314 | 94.11020966 | -0.312157928 | 0.597777344 | 0.2647841 |
| <b>friC</b> | gi 49175990 ref NC_000913.2 | + | 3500362 | 3501192 | 64.11053115  | 53.12906476 | 58.00504863 | 43.93931158 | 54.90520429 | 0.193866308  | 0.275175055 | 0.1029688 |
| <b>friD</b> | gi 49175990 ref NC_000913.2 | + | 3501189 | 3501974 | 87.88969601  | 80.70053448 | 88.10814388 | 69.60694113 | 64.14493465 | 0.211912918  | 0.345048113 | 0.1356717 |
| <b>friR</b> | gi 49175990 ref NC_000913.2 | + | 3502074 | 3502805 | 194.1237386  | 207.0817283 | 247.2640713 | 206.3672761 | 187.5774941 | -0.088525232 | 0.145939323 | 0.0438611 |
| <b>yhfS</b> | gi 49175990 ref NC_000913.2 | - | 3502957 | 3504042 | 59.61600058  | 36.91248098 | 63.96907691 | 43.87468166 | 40.61468145 | 0.03410771   | 0.029034508 | 0.0017515 |
| <b>yhfT</b> | gi 49175990 ref NC_000913.2 | - | 3504054 | 3505358 | 55.98487354  | 59.85419273 | 61.67355901 | 45.01951199 | 48.32674153 | 0.169235144  | 0.261181165 | 0.0963912 |
| <b>yhfU</b> | gi 49175990 ref NC_000913.2 | - | 3505370 | 3505723 | 46.79131013  | 59.90780249 | 46.99128803 | 58.23727292 | 60.45474869 | -0.086894628 | 0.048024756 | 0.0078702 |
| <b>php</b>  | gi 49175990 ref NC_000913.2 | - | 3505734 | 3506612 | 35.44309791  | 46.60977256 | 47.85891729 | 59.1490533  | 39.51019331 | -0.281684215 | 0.377502798 | 0.1485519 |
| <b>yhfW</b> | gi 49175990 ref NC_000913.2 | - | 3506609 | 3507835 | 21.51898876  | 19.92779635 | 36.62181898 | 31.37257303 | 23.78131238 | -0.539366556 | 0.973276176 | 0.4749603 |
| <b>yhfX</b> | gi 49175990 ref NC_000913.2 | - | 3507835 | 3508998 | 9.428627112  | 9.49423632  | 9.638239589 | 16.63826848 | 11.28437825 | -0.408544817 | 0.318327203 | 0.1240538 |
| <b>yhfY</b> | gi 49175990 ref NC_000913.2 | - | 3509082 | 3509444 | 25.24743212  | 37.12879628 | 42.01699469 | 30.45816789 | 37.00862623 | -0.256907824 | 0.304345964 | 0.1175135 |
| <b>yhfZ</b> | gi 49175990 ref NC_000913.2 | - | 3509461 | 3510366 | 79.12736436  | 91.22736433 | 113.6275883 | 104.2476483 | 89.95289532 | -0.278125516 | 0.551876796 | 0.2392178 |
| <b>trpS</b> | gi 49175990 ref NC_000913.2 | - | 3510656 | 3511660 | 988.3734304  | 918.4293301 | 893.0228595 | 704.2156595 | 644.1877449 | 0.377120424  | 0.97136709  | 0.4737224 |
| <b>gph</b>  | gi 49175990 ref NC_000913.2 | - | 3511653 | 3512411 | 660.7976138  | 628.7481865 | 605.4600991 | 501.273617  | 479.1929779 | 0.304567796  | 0.711277329 | 0.3184473 |
| <b>rpe</b>  | gi 49175990 ref NC_000913.2 | - | 3512404 | 3513081 | 810.0027566  | 709.4439672 | 794.090108  | 660.5419977 | 701.1479169 | 0.107063389  | 0.153888579 | 0.0483816 |

|             |                             |   |         |         |             |             |             |             |             |              |             |           |
|-------------|-----------------------------|---|---------|---------|-------------|-------------|-------------|-------------|-------------|--------------|-------------|-----------|
| <b>dam</b>  | gi 49175990 ref NC_000913.2 | - | 3513099 | 3513935 | 815.347979  | 786.4230267 | 823.5992539 | 726.6691191 | 796.4000578 | 0.043263912  | 0.061948409 | 0.0128622 |
| <b>damX</b> | gi 49175990 ref NC_000913.2 | - | 3514042 | 3515328 | 2161.095559 | 2195.018243 | 2028.526086 | 1919.511432 | 2078.502131 | 0.115217275  | 0.221475138 | 0.0773895 |
| <b>aroB</b> | gi 49175990 ref NC_000913.2 | - | 3515420 | 3516508 | 3291.427941 | 3153.350095 | 3040.165617 | 2588.856059 | 2577.888564 | 0.251141265  | 0.552510754 | 0.2392304 |
| <b>aroK</b> | gi 49175990 ref NC_000913.2 | - | 3516565 | 3517086 | 1459.503165 | 1448.455068 | 1481.338087 | 1320.758553 | 1231.864567 | 0.121761385  | 0.219843216 | 0.0762031 |
| <b>hofQ</b> | gi 49175990 ref NC_000913.2 | - | 3517487 | 3518725 | 46.55979076 | 35.06710025 | 56.76227584 | 50.50380542 | 49.43584584 | -0.318396071 | 0.678270992 | 0.3037385 |
| <b>hofP</b> | gi 49175990 ref NC_000913.2 | - | 3518637 | 3519041 | 13.51378961 | 9.45293239  | 14.32325113 | 10.17415106 | 11.25458123 | -0.008646873 | 0.004222156 | 0         |
| <b>hofO</b> | gi 49175990 ref NC_000913.2 | - | 3519031 | 3519471 | 16.59982648 | 13.26119722 | 25.8638708  | 16.92346945 | 15.85089    | -0.346842268 | 0.47666927  | 0.2007769 |
| <b>hofN</b> | gi 49175990 ref NC_000913.2 | - | 3519455 | 3519994 | 18.25881014 | 9.412483828 | 28.24899016 | 18.00508643 | 12.60000755 | -0.420362208 | 0.607677872 | 0.2691403 |
| <b>hofM</b> | gi 49175990 ref NC_000913.2 | - | 3519994 | 3520773 | 54.03692976 | 43.62786012 | 72.78490149 | 67.31710946 | 67.35197908 | -0.473027179 | 1.198767056 | 0.6198569 |
| <b>mrca</b> | gi 49175990 ref NC_000913.2 | + | 3520893 | 3523445 | 694.1460256 | 679.1009961 | 623.4407212 | 577.5114522 | 624.7563677 | 0.179116544  | 0.388032955 | 0.1543669 |
| <b>nudE</b> | gi 49175990 ref NC_000913.2 | - | 3523611 | 3524171 | 468.4248374 | 525.2944889 | 338.5651004 | 370.9965138 | 347.7761258 | 0.476360624  | 1.689622344 | 0.9718025 |
| <b>yrfF</b> | gi 49175990 ref NC_000913.2 | + | 3524491 | 3526626 | 1494.812164 | 1494.999534 | 1468.791835 | 1402.692938 | 1593.828619 | 0.00526539   | 0.012821463 | 0         |
| <b>yrfG</b> | gi 49175990 ref NC_000913.2 | + | 3526691 | 3527359 | 975.8441926 | 1060.025097 | 848.4751823 | 918.3155887 | 1100.078957 | 0.070732272  | 0.171067174 | 0.0538242 |
| <b>hsiR</b> | gi 49175990 ref NC_000913.2 | + | 3527370 | 3527771 | 334.0853219 | 302.9430204 | 299.9828833 | 300.5164207 | 318.4988339 | 0.068249645  | 0.097542629 | 0.0262976 |
| <b>hsiO</b> | gi 49175990 ref NC_000913.2 | + | 3527796 | 3528674 | 597.7819506 | 554.6515417 | 467.1701323 | 505.5211095 | 462.2378709 | 0.277443584  | 0.691075967 | 0.3093052 |
| <b>yhgE</b> | gi 49175990 ref NC_000913.2 | - | 3528737 | 3530461 | 330.8180605 | 310.5565089 | 353.0214851 | 332.0232857 | 390.1816891 | -0.152687485 | 0.324897782 | 0.1265519 |
| <b>pck</b>  | gi 49175990 ref NC_000913.2 | + | 3530840 | 3532462 | 4366.810702 | 4007.210132 | 8521.76912  | 7495.904774 | 5768.433794 | -0.768444668 | 2.887282405 | 1.9237717 |
| <b>envZ</b> | gi 49175990 ref NC_000913.2 | - | 3532538 | 3533890 | 1133.961972 | 1107.465082 | 1249.653523 | 1269.05403  | 1143.20138  | -0.117961925 | 0.240767293 | 0.0867246 |
| <b>ompR</b> | gi 49175990 ref NC_000913.2 | - | 3533887 | 3534606 | 1049.523162 | 991.5725087 | 1172.890289 | 1142.529229 | 1225.976363 | -0.202348422 | 0.477689317 | 0.2010025 |
| <b>greB</b> | gi 49175990 ref NC_000913.2 | + | 3534834 | 3535310 | 164.6225762 | 207.1506514 | 132.8083843 | 202.7818679 | 227.2997942 | -0.06497851  | 0.009328195 | 0         |
| <b>yhfF</b> | gi 49175990 ref NC_000913.2 | + | 3535407 | 3537728 | 1018.18967  | 904.1611306 | 598.4664508 | 541.7575721 | 681.7462326 | 0.678046595  | 2.762444587 | 1.8208812 |
| <b>feoA</b> | gi 49175990 ref NC_000913.2 | + | 3538185 | 3538412 | 830.1036986 | 896.6545626 | 401.4347195 | 318.6761597 | 373.4940752 | 1.240371851  | 7.863124679 | 6.2660475 |
| <b>feoB</b> | gi 49175990 ref NC_000913.2 | + | 3538429 | 3540750 | 4688.920097 | 4720.563416 | 1210.468051 | 1013.632909 | 970.5094486 | 2.152949645  | 20.03025666 | 17.420342 |
| <b>feoC</b> | gi 49175990 ref NC_000913.2 | + | 3540750 | 3540986 | 786.1020982 | 808.2986621 | 172.7541392 | 186.1701063 | 186.1701063 | 2.125748648  | 21.88908274 | 19.124266 |
| <b>yhgA</b> | gi 49175990 ref NC_000913.2 | + | 3541189 | 3542067 | 157.4349203 | 139.5710634 | 117.3125514 | 133.4100802 | 145.647878  | 0.176607465  | 0.32373633  | 0.1259463 |
| <b>bioH</b> | gi 49175990 ref NC_000913.2 | - | 3542096 | 3542866 | 283.2810339 | 283.9905566 | 274.1115517 | 266.7001138 | 207.8612833 | 0.191593168  | 0.384702916 | 0.1533681 |
| <b>gntX</b> | gi 49175990 ref NC_000913.2 | + | 3542904 | 3543587 | 306.863598  | 234.4864851 | 275.075308  | 228.7872948 | 205.5452275 | 0.242838438  | 0.390626325 | 0.1556435 |
| <b>nfuA</b> | gi 49175990 ref NC_000913.2 | + | 3543646 | 3544221 | 600.0131793 | 606.9307902 | 371.618639  | 376.7264049 | 388.0774765 | 0.668758135  | 2.897645539 | 1.9331534 |
| <b>gntT</b> | gi 49175990 ref NC_000913.2 | + | 3544581 | 3545897 | 318.8923305 | 293.4514074 | 500.8397536 | 489.7490122 | 356.0325637 | -0.531657497 | 1.732852077 | 1.0056234 |
| <b>maiQ</b> | gi 49175990 ref NC_000913.2 | - | 3546008 | 3548092 | 1765.405142 | 1523.424205 | 6402.830501 | 5214.131634 | 2178.382589 | -1.431630262 | 5.412703336 | 4.0972552 |
| <b>maiP</b> | gi 49175990 ref NC_000913.2 | - | 3548102 | 3550495 | 2555.499878 | 2158.837906 | 8398.743171 | 7390.212158 | 3351.630852 | -1.387559102 | 5.529678652 | 4.2030655 |
| <b>maiT</b> | gi 49175990 ref NC_000913.2 | + | 3551107 | 3553812 | 3934.796702 | 4047.15732  | 7509.122011 | 7376.0022   | 7090.566397 | -0.87822713  | 3.75047181  | 2.6484133 |
| <b>rtcA</b> | gi 49175990 ref NC_000913.2 | - | 3553855 | 3554871 | 239.6932987 | 244.1051672 | 310.9007657 | 359.7477656 | 337.6428684 | -0.48217691  | 1.455838695 | 0.7962891 |
| <b>rtcB</b> | gi 49175990 ref NC_000913.2 | - | 3554875 | 3556101 | 90.69066537 | 95.94675562 | 94.20708064 | 102.9913501 | 84.30557749 | -0.014188598 | 0           | 0         |
| <b>rtcR</b> | gi 49175990 ref NC_000913.2 | + | 3556290 | 3557888 | 146.7484058 | 199.5834851 | 169.3408933 | 135.8839238 | 157.0156269 | 0.134685027  | 0.308900932 | 0.1196023 |
| <b>glpR</b> | gi 49175990 ref NC_000913.2 | - | 3557870 | 3558628 | 505.6734163 | 466.3166549 | 398.0344102 | 340.0183154 | 453.998058  | 0.302020699  | 0.724559161 | 0.3248854 |
| <b>glpG</b> | gi 49175990 ref NC_000913.2 | - | 3558645 | 3559475 | 898.1142974 | 840.5482053 | 716.2478451 | 614.6424178 | 745.7872644 | 0.340751325  | 0.929018501 | 0.4516294 |
| <b>glpE</b> | gi 49175990 ref NC_000913.2 | - | 3559520 | 3559846 | 413.7632479 | 432.1798579 | 261.9884576 | 283.7324843 | 336.2244545 | 0.510732274  | 1.794552907 | 1.0497425 |
| <b>glpD</b> | gi 49175990 ref NC_000913.2 | + | 3560036 | 3561541 | 18646.74075 | 18465.28104 | 26399.90334 | 21013.91959 | 25123.39457 | -0.373206889 | 0.941067201 | 0.4572842 |
| <b>glgP</b> | gi 49175990 ref NC_000913.2 | - | 3562157 | 3564604 | 2212.081721 | 2328.009101 | 3419.76949  | 3221.003351 | 2803.475266 | -0.472375128 | 1.435388878 | 0.7811622 |
| <b>glgA</b> | gi 49175990 ref NC_000913.2 | - | 3564623 | 3566056 | 1876.75061  | 1782.767867 | 2985.660409 | 2802.73184  | 2150.797217 | -0.514972633 | 1.544308873 | 0.860222  |
| <b>glgC</b> | gi 49175990 ref NC_000913.2 | - | 3566056 | 3567351 | 1365.870475 | 1214.749767 | 2355.210894 | 2145.729957 | 1548.519569 | -0.614305997 | 2.008210631 | 1.2056112 |
| <b>glgX</b> | gi 49175990 ref NC_000913.2 | - | 3567369 | 3569342 | 1246.793615 | 1259.450975 | 2194.065555 | 1857.587973 | 1168.44698  | -0.454663261 | 1.159354935 | 0.5764721 |
| <b>glgB</b> | gi 49175990 ref NC_000913.2 | - | 3569339 | 3571525 | 2081.920604 | 1926.176862 | 2966.447811 | 2628.891157 | 1668.709659 | -0.244148255 | 0.529280477 | 0.2272311 |
| <b>asd</b>  | gi 49175990 ref NC_000913.2 | - | 3571798 | 3572901 | 1691.440319 | 1516.79348  | 2458.31249  | 2005.736467 | 1551.872083 | -0.288819328 | 0.699747608 | 0.3125497 |
| <b>yhgN</b> | gi 49175990 ref NC_000913.2 | + | 3573094 | 3573687 | 143.0891782 | 149.1325182 | 162.9377451 | 148.078163  | 152.5888906 | -0.082032833 | 0.123648414 | 0.0368896 |
| <b>gntU</b> | gi 49175990 ref NC_000913.2 | - | 3573744 | 3575084 | 212.1595173 | 200.3822951 | 193.0381083 | 156.0087335 | 162.7477751 | 0.291030466  | 0.619951998 | 0.2762693 |
| <b>gntK</b> | gi 49175990 ref NC_000913.2 | - | 3575088 | 3575615 | 130.5966205 | 130.1185086 | 115.7976464 | 114.5141906 | 144.4275867 | 0.057315022  | 0.09796208  | 0.0262976 |
| <b>gntR</b> | gi 49175990 ref NC_000913.2 | - | 3575754 | 3576749 | 1014.699647 | 1192.08681  | 1095.851509 | 1042.766671 | 1122.790382 | -0.001091138 | 0.038560362 | 0.0042561 |
| <b>yhhW</b> | gi 49175990 ref NC_000913.2 | - | 3576973 | 3577668 | 418.2153217 | 432.1749939 | 657.3457091 | 598.6537612 | 502.8546541 | -0.458659981 | 1.424004294 | 0.7753008 |
| <b>yhhX</b> | gi 49175990 ref NC_000913.2 | - | 3577791 | 3578828 | 1022.693003 | 1061.903188 | 1377.089716 | 1316.307367 | 1387.548806 | -0.388520632 | 1.100044657 | 0.5577652 |
| <b>yhhY</b> | gi 49175990 ref NC_000913.2 | + | 3579161 | 3579649 | 192.2856448 | 248.9571749 | 216.6568306 | 236.5407694 | 245.5597103 | -0.118113752 | 0.126209209 | 0.0373086 |
| <b>insA</b> | gi 49175990 ref NC_000913.2 | + | 3581506 | 3581781 | 122.8155458 | 132.0474721 | 118.5721661 | 125.6582748 | 150.0605935 | -0.060291398 | 0.056994605 | 0.0108652 |
| <b>insB</b> | gi 49175990 ref NC_000913.2 | + | 3581700 | 3582203 | 134.66366   | 152.0136255 | 173.0723144 | 140.2806443 | 139.2458213 | -0.078932268 | 0.112358702 | 0.031361  |
| <b>yrhB</b> | gi 49175990 ref NC_000913.2 | + | 3582782 | 3583066 | 12.48976419 | 5.626027238 | 7.053877398 | 12.26459839 | 12.27047824 | -0.165462041 | 0.106630817 | 0.0284507 |
| <b>ggt</b>  | gi 49175990 ref NC_000913.2 | - | 3583104 | 3584846 | 484.4426128 | 417.8468348 | 450.8121112 | 374.7382865 | 460.8781348 | 0.097685832  | 0.132613077 | 0.0396305 |
| <b>yhhA</b> | gi 49175990 ref NC_000913.2 | + | 3584966 | 3585406 | 304.1648209 | 299.1792292 | 486.8139094 | 569.1179252 | 375.1181955 | -0.657017328 | 2.277186252 | 1.4155241 |



|             |                             |   |         |         |             |              |              |             |             |              |              |           |
|-------------|-----------------------------|---|---------|---------|-------------|--------------|--------------|-------------|-------------|--------------|--------------|-----------|
| <b>ugpQ</b> | gi 49175990 ref NC_000913.2 | - | 3585393 | 3586136 | 254.091003  | 219.3406203  | 297.4066914  | 245.5562875 | 200.0559367 | -0.030720304 | 0.09860081   | 0.0262976 |
| <b>ugpC</b> | gi 49175990 ref NC_000913.2 | - | 3586133 | 3587203 | 171.4164014 | 147.1564623  | 174.5765523  | 159.1843418 | 137.0940247 | 0.049299536  | 0.032005028  | 0.0030156 |
| <b>ugpE</b> | gi 49175990 ref NC_000913.2 | - | 3587205 | 3588050 | 33.01859683 | 28.45669824  | 32.04964016  | 44.51601293 | 26.0578921  | -0.140997529 | 0.175180894  | 0.0550844 |
| <b>ugpA</b> | gi 49175990 ref NC_000913.2 | - | 3588047 | 3588934 | 24.61012361 | 14.15520941  | 25.201769    | 27.92495807 | 21.44349242 | -0.304065218 | 0.487176879  | 0.2053306 |
| <b>ugpB</b> | gi 49175990 ref NC_000913.2 | - | 3589032 | 3590348 | 71.6485928  | 79.81618187  | 95.04451317  | 94.01537677 | 66.52907875 | -0.174647983 | 0.279656856  | 0.1055868 |
| <b>livF</b> | gi 49175990 ref NC_000913.2 | - | 3590747 | 3591460 | 42.13641133 | 44.65246426  | 37.13850215  | 38.08541566 | 34.83983973 | 0.237131451  | 0.373746431  | 0.1468014 |
| <b>livG</b> | gi 49175990 ref NC_000913.2 | - | 3591462 | 3592229 | 33.1346532  | 38.97852214  | 32.19957085  | 14.85492761 | 21.37060231 | 0.663390067  | 1.33043458   | 0.7169348 |
| <b>livM</b> | gi 49175990 ref NC_000913.2 | - | 3592226 | 3593503 | 54.26663999 | 38.84916689  | 47.08427122  | 33.78125736 | 34.88938911 | 0.320617235  | 0.460939491  | 0.1934841 |
| <b>livH</b> | gi 49175990 ref NC_000913.2 | - | 3593500 | 3594426 | 25.95128101 | 14.14577294  | 17.35581274  | 13.63555706 | 23.34580524 | 0.20077577   | 0.101574792  | 0.0267012 |
| <b>livK</b> | gi 49175990 ref NC_000913.2 | - | 3594474 | 3595583 | 43.24975607 | 49.42326121  | 30.8469312   | 38.01961379 | 34.77832652 | 0.402430197  | 0.856891825  | 0.402617  |
| <b>yhhK</b> | gi 49175990 ref NC_000913.2 | + | 3596007 | 3596390 | 399.8721355 | 418.8837585  | 476.13477659 | 421.7447513 | 486.7222204 | -0.176922257 | 0.360743717  | 0.1426462 |
| <b>livJ</b> | gi 49175990 ref NC_000913.2 | - | 3596578 | 3597681 | 99.95886663 | 89.23809218  | 93.67877089  | 76.37558476 | 79.7187024  | 0.20678607   | 0.35714761   | 0.1413425 |
| <b>rhoH</b> | gi 49175990 ref NC_000913.2 | - | 3597952 | 3598806 | 7549.855118 | 7659.284688  | 5101.890984  | 6326.345409 | 5548.152829 | 0.416589627  | 1.204269025  | 0.6233323 |
| <b>ftsX</b> | gi 49175990 ref NC_000913.2 | - | 3599051 | 3600109 | 746.0181101 | 702.8287889  | 783.2430661  | 709.6147092 | 563.5061973 | 0.099138803  | 0.147034087  | 0.0441955 |
| <b>ftsE</b> | gi 49175990 ref NC_000913.2 | - | 3600102 | 3600770 | 659.5394207 | 626.8480507  | 686.4094605  | 636.6888952 | 481.6607914 | 0.114412687  | 0.178007752  | 0.0563259 |
| <b>ftsY</b> | gi 49175990 ref NC_000913.2 | - | 3600773 | 3602266 | 911.2286664 | 887.1073463  | 1252.659499  | 1071.806047 | 866.3982718 | -0.224712282 | 0.531939339  | 0.22845   |
| <b>rsmD</b> | gi 49175990 ref NC_000913.2 | + | 3602416 | 3603012 | 262.4697958 | 262.1432574  | 229.7310569  | 236.5811002 | 246.7141976 | 0.140145823  | 0.282786365  | 0.1073228 |
| <b>yhhL</b> | gi 49175990 ref NC_000913.2 | + | 3603002 | 3603271 | 134.6356048 | 122.4854956  | 98.58466339  | 103.2256021 | 120.9400384 | 0.263581451  | 0.570608513  | 0.2491116 |
| <b>yhhM</b> | gi 49175990 ref NC_000913.2 | - | 3603274 | 3603633 | 198.8124299 | 193.7466584  | 157.3431843  | 123.5623242 | 143.5634202 | 0.483504924  | 1.344982222  | 0.7276213 |
| <b>yhhN</b> | gi 49175990 ref NC_000913.2 | + | 3603774 | 3604400 | 726.6429379 | 779.8244403  | 789.8264759  | 891.1984607 | 856.9856972 | -0.182628596 | 0.359710615  | 0.1424431 |
| <b>zntA</b> | gi 49175990 ref NC_000913.2 | + | 3604474 | 3606672 | 1697.688487 | 1549.095229  | 1720.461704  | 1758.909208 | 1427.144407 | 0.006407746  | 0.012233791  | 0         |
| <b>tusA</b> | gi 49175990 ref NC_000913.2 | - | 3606774 | 3607019 | 274.272043  | 290.6635207  | 169.6232161  | 188.6112453 | 289.8248066 | 0.363421954  | 0.925080371  | 0.4496612 |
| <b>yhhQ</b> | gi 49175990 ref NC_000913.2 | + | 3607240 | 3607905 | 372.4413375 | 352.3513241  | 200.4894343  | 263.5812549 | 367.2360178 | 0.374497492  | 0.937140068  | 0.4556249 |
| <b>dcrB</b> | gi 49175990 ref NC_000913.2 | + | 3607978 | 3608535 | 2791.245286 | 3018.535608  | 2991.983403  | 2869.181819 | 3403.108198 | -0.101966176 | 0.155915326  | 0.0487535 |
| <b>yhhS</b> | gi 49175990 ref NC_000913.2 | - | 3608539 | 3609756 | 533.7967703 | 533.789971   | 619.3205902  | 568.5141766 | 585.5759787 | -0.143461584 | 0.293406426  | 0.1132795 |
| <b>yhhT</b> | gi 49175990 ref NC_000913.2 | + | 3609888 | 3610937 | 220.0940013 | 227.0138673  | 255.5205472  | 249.8650474 | 189.9353086 | -0.048623207 | 0.075016596  | 0.0181358 |
| <b>acpT</b> | gi 49175990 ref NC_000913.2 | + | 3610992 | 3611579 | 527.7954383 | 581.325353   | 529.6421036  | 554.9701834 | 575.3711367 | -0.013585816 | 0.006871867  | 0         |
| <b>nikA</b> | gi 49175990 ref NC_000913.2 | + | 3611690 | 3613264 | 1034.261721 | 1010.584545  | 1266.859434  | 811.321275  | 1610.075794 | -0.260208445 | 0.524801591  | 0.2249696 |
| <b>nikB</b> | gi 49175990 ref NC_000913.2 | + | 3613264 | 3614208 | 993.6182338 | 872.8124138  | 974.7301577  | 630.7451163 | 1124.553785 | 0.060219275  | 0.057525392  | 0.0110921 |
| <b>nikC</b> | gi 49175990 ref NC_000913.2 | + | 3614205 | 3615038 | 671.3027178 | 566.9565323  | 859.2216619  | 509.7518585 | 1006.689126 | -0.324795569 | 0.779542159  | 0.3574304 |
| <b>nikD</b> | gi 49175990 ref NC_000913.2 | + | 3615038 | 3615802 | 645.1314502 | 594.5404039  | 936.2469036  | 541.1916367 | 1141.205763 | -0.476677236 | 1.231210438  | 0.6441366 |
| <b>nikE</b> | gi 49175990 ref NC_000913.2 | + | 3615799 | 3616605 | 517.9788428 | 434.9313912  | 714.5669909  | 386.5142296 | 860.7611947 | -0.425402278 | 1.017683922  | 0.5081401 |
| <b>nikR</b> | gi 49175990 ref NC_000913.2 | + | 3616611 | 3617012 | 279.7435631 | 259.2617101  | 328.2120621  | 279.625823  | 469.3321711 | -0.409708669 | 1.020539493  | 0.5103057 |
| <b>rhsB</b> | gi 49175990 ref NC_000913.2 | + | 3617215 | 3621450 | 224.2164798 | 254.6000182  | 273.1831218  | 252.3717528 | 272.5405566 | -0.167161559 | 0.2966078031 | 0.1141666 |
| <b>yhhI</b> | gi 49175990 ref NC_000913.2 | + | 3622401 | 3623537 | 33.30262042 | 50.44848059  | 29.88272153  | 46.85025971 | 39.25719438 | 0.055951017  | 0.144424407  | 0.0324219 |
| <b>yhhJ</b> | gi 49175990 ref NC_000913.2 | - | 3623702 | 3624826 | 426.7231148 | 332.3211106  | 182.7173447  | 184.825621  | 141.6555647 | 1.200085386  | 6.257296905  | 4.8273059 |
| <b>rbbA</b> | gi 49175990 ref NC_000913.2 | - | 3624826 | 3627561 | 780.7980773 | 719.9154201  | 440.9725432  | 421.3554502 | 293.2716638 | 0.984128356  | 4.599054369  | 3.3800751 |
| <b>yhhI</b> | gi 49175990 ref NC_000913.2 | - | 3627558 | 3628625 | 577.9697162 | 577.4809285  | 461.2046989  | 495.1813717 | 314.6256157 | 0.454139386  | 1.297737396  | 0.6927928 |
| <b>yhhJ</b> | gi 49175990 ref NC_000913.2 | - | 3628991 | 3630613 | 33.08969142 | 39.93511912  | 13.23973981  | 40.0370083  | 6.80475928  | 0.227767876  | 0.360168813  | 0.1424431 |
| <b>yhhM</b> | gi 49175990 ref NC_000913.2 | + | 3632864 | 3633916 | 56.53487962 | 62.71535732  | 59.64953141  | 59.40606914 | 56.15005098 | 0.019892669  | 0.029063572  | 0.0017515 |
| <b>yhhN</b> | gi 49175990 ref NC_000913.2 | - | 3634231 | 3635433 | 329.6655919 | 299.1441301  | 318.4034028  | 237.8407341 | 214.5878002 | 0.32203361   | 0.668763167  | 0.299398  |
| <b>pitA</b> | gi 49175990 ref NC_000913.2 | + | 3635665 | 3637164 | 2194.996137 | 2342.263017  | 2349.883849  | 2153.995026 | 2815.194345 | -0.117075356 | 0.180077772  | 0.0573017 |
| <b>uspB</b> | gi 49175990 ref NC_000913.2 | - | 3637408 | 3637743 | 302.3453257 | 290.6209221  | 533.918492   | 454.8690985 | 200.6222915 | -0.38773147  | 0.805545201  | 0.3714324 |
| <b>uspA</b> | gi 49175990 ref NC_000913.2 | + | 3638134 | 3638568 | 5217.680635 | 5280.95494   | 6931.794654  | 7520.29423  | 5227.752111 | -0.318896099 | 0.731846277  | 0.3284879 |
| <b>dtpB</b> | gi 49175990 ref NC_000913.2 | + | 3638885 | 3640354 | 1982.841047 | 1840.695431  | 2870.060948  | 2511.348394 | 2073.349978 | -0.355496935 | 0.931038369  | 0.4525949 |
| <b>yhhQ</b> | gi 49175990 ref NC_000913.2 | - | 3640403 | 3641155 | 401.6386486 | 360.8768055  | 357.4215417  | 317.2633815 | 263.9364051 | 0.310522495  | 0.699176511  | 0.3122386 |
| <b>prlC</b> | gi 49175990 ref NC_000913.2 | - | 3641163 | 3643205 | 1730.16973  | 1733.403117  | 1743.276498  | 1482.081598 | 1070.698724 | 0.290819696  | 0.598310287  | 0.2650874 |
| <b>yhhR</b> | gi 49175990 ref NC_000913.2 | + | 3643408 | 3644250 | 453.8150497 | 524.3585104  | 476.4436918  | 516.7213939 | 466.7406558 | -0.014600623 | 0.013315738  | 0         |
| <b>gor</b>  | gi 49175990 ref NC_000913.2 | + | 3644322 | 3645674 | 748.1225575 | 662.9086762  | 857.5364217  | 767.9413651 | 626.2992905 | -0.061368563 | 0.158895163  | 0.0493545 |
| <b>dinQ</b> | gi 49175990 ref NC_000913.2 | - | 3645728 | 3645856 | 4141.104866 | 5149.962434  | 3882.409166  | 3735.887796 | 4802.889606 | 0.129449072  | 0.327631953  | 0.1493075 |
| <b>arsR</b> | gi 49175990 ref NC_000913.2 | + | 3646551 | 3646904 | 29.43119221 | 33.26743653  | 35.63856843  | 28.1939446  | 35.81908135 | -0.090516226 | 0.0477474191 | 0.0181358 |
| <b>arsB</b> | gi 49175990 ref NC_000913.2 | + | 3646958 | 3648247 | 94.50575216 | 98.79205649  | 81.14913582  | 91.8138543  | 81.95413239 | 0.1775841    | 0.370564004  | 0.1454249 |
| <b>arsC</b> | gi 49175990 ref NC_000913.2 | + | 3648260 | 3648685 | 36.57086551 | 51.37971019  | 43.55454066  | 49.07447799 | 28.38250337 | 0.091517055  | 0.154907412  | 0.0487535 |
| <b>insH</b> | gi 49175990 ref NC_000913.2 | - | 3650205 | 3651221 | 87.51151562 | 1008.7655182 | 862.8558186  | 980.8966058 | 957.9124459 | -0.017132671 | 0.018030228  | 0         |
| <b>slp</b>  | gi 49175990 ref NC_000913.2 | + | 3651984 | 3652550 | 107.8656088 | 136.860472   | 92.34206959  | 158.440384  | 83.43664222 | 0.092861821  | 0.20955034   | 0.0713676 |
| <b>dctR</b> | gi 49175990 ref NC_000913.2 | + | 3652706 | 3653236 | 10.03455665 | 10.44778144  | 4.550885946  | 16.48607043 | 7.946544746 | 0.05448365   | 0.051435634  | 0.0088785 |
| <b>yhhD</b> | gi 49175990 ref NC_000913.2 | - | 3653278 | 3653925 | 21.58249433 | 18.96909619  | 10.27782857  | 32.09080529 | 21.32924826 | -0.082118984 | 0.057364165  | 0.0110495 |

|             |                             |   |         |         |             |             |             |             |             |              |             |           |
|-------------|-----------------------------|---|---------|---------|-------------|-------------|-------------|-------------|-------------|--------------|-------------|-----------|
| <b>hdeB</b> | gi 49175990 ref NC_000913.2 | - | 3653989 | 3654315 | 48.21321489 | 57.03416459 | 40.24546019 | 142.0769186 | 47.66993673 | -0.593710877 | 0.750529146 | 0.3411917 |
| <b>hdeA</b> | gi 49175990 ref NC_000913.2 | - | 3654431 | 3654763 | 224.2396912 | 252.697068  | 192.4452367 | 350.1969826 | 240.224707  | -0.165357634 | 0.200647751 | 0.0668401 |
| <b>hdeD</b> | gi 49175990 ref NC_000913.2 | + | 3655018 | 3655590 | 130.9448531 | 144.4055019 | 151.8828663 | 198.1662986 | 168.3211919 | -0.348586003 | 0.733613928 | 0.3289039 |
| <b>gadE</b> | gi 49175990 ref NC_000913.2 | + | 3656389 | 3656916 | 15.31943299 | 12.31387264 | 16.62927453 | 36.52987741 | 19.25682195 | -0.796556423 | 1.330406715 | 0.1719348 |
| <b>mdtE</b> | gi 49175990 ref NC_000913.2 | + | 3657255 | 3658412 | 54.36894009 | 68.45484818 | 53.47885765 | 67.10107241 | 58.37221755 | -0.008917643 | 0.050619802 | 0.0085479 |
| <b>mdtF</b> | gi 49175990 ref NC_000913.2 | + | 3658437 | 3661550 | 283.3791262 | 275.428832  | 260.2397929 | 269.0826355 | 277.0150833 | 0.057645043  | 0.098460641 | 0.0262976 |
| <b>gadW</b> | gi 49175990 ref NC_000913.2 | - | 3661913 | 3662641 | 316.7269342 | 317.2335872 | 116.7523279 | 191.3524034 | 172.6126813 | 0.96441671   | 4.348685562 | 3.1652824 |
| <b>gadX</b> | gi 49175990 ref NC_000913.2 | - | 3663009 | 3663833 | 499.4717611 | 538.5737868 | 231.3971427 | 486.884538  | 347.7956688 | 0.509841248  | 1.496583357 | 0.8231827 |
| <b>gadA</b> | gi 49175990 ref NC_000913.2 | - | 3664203 | 3665603 | 123.2279722 | 113.9438352 | 111.6502618 | 126.5394332 | 110.0314003 | 0.038581777  | 0.043440742 | 0.0060195 |
| <b>yhjA</b> | gi 49175990 ref NC_000913.2 | - | 3665814 | 3667211 | 363.3889275 | 367.5780314 | 489.8779612 | 586.0616867 | 470.2070668 | -0.500971438 | 1.569233348 | 0.87892   |
| <b>treF</b> | gi 49175990 ref NC_000913.2 | + | 3667615 | 3669264 | 353.3746071 | 348.5705957 | 300.8799633 | 303.7022898 | 250.4034529 | 0.306452748  | 0.75153894  | 0.3414472 |
| <b>yhjB</b> | gi 49175990 ref NC_000913.2 | - | 3669315 | 3669917 | 64.94162441 | 65.53554608 | 53.0062711  | 45.02259979 | 57.0769509  | 0.3362571    | 0.683707222 | 0.3062807 |
| <b>yhjC</b> | gi 49175990 ref NC_000913.2 | + | 3670437 | 3671336 | 88.33737402 | 67.34414144 | 55.87696924 | 57.20475646 | 60.51961078 | 0.457895562  | 1.02283299  | 0.5112161 |
| <b>yhjD</b> | gi 49175990 ref NC_000913.2 | + | 3671385 | 3672398 | 607.2141656 | 568.9031024 | 512.7682226 | 492.0326633 | 371.703543  | 0.375988084  | 0.979791041 | 0.4786629 |
| <b>yhjE</b> | gi 49175990 ref NC_000913.2 | + | 3672809 | 3674131 | 124.1883875 | 128.2325754 | 106.3269564 | 110.9912077 | 113.2571047 | 0.189577426  | 0.40187758  | 0.1627105 |
| <b>yhjG</b> | gi 49175990 ref NC_000913.2 | - | 3674313 | 3676373 | 1036.467667 | 926.0095667 | 1313.630201 | 1073.014687 | 934.7609626 | -0.143699961 | 0.345604557 | 0.1360554 |
| <b>yhjH</b> | gi 49175990 ref NC_000913.2 | - | 3676443 | 3677210 | 833.2454521 | 752.1992014 | 1450.673338 | 1264.70406  | 1152.270863 | -0.677344143 | 2.728206114 | 1.7977196 |
| <b>kdgK</b> | gi 49175990 ref NC_000913.2 | + | 3677442 | 3678371 | 438.7068762 | 414.0877279 | 496.0449198 | 514.4646986 | 434.3325061 | -0.165270492 | 0.37017463  | 0.1454249 |
| <b>yhjJ</b> | gi 49175990 ref NC_000913.2 | - | 3678467 | 3679963 | 1155.191488 | 1203.426778 | 1564.186791 | 1722.951221 | 1369.913836 | -0.401754182 | 1.09843456  | 0.5577652 |
| <b>dctA</b> | gi 49175990 ref NC_000913.2 | - | 3680184 | 3681470 | 358.8750879 | 385.6518157 | 1188.091253 | 969.6323211 | 553.8331842 | -1.265456546 | 5.60326143  | 4.2675049 |
| <b>yhjK</b> | gi 49175990 ref NC_000913.2 | - | 3681653 | 3683641 | 688.5362957 | 660.0953959 | 712.9354826 | 605.4938915 | 554.3910307 | 0.128088289  | 0.21848395  | 0.0758113 |
| <b>bcsC</b> | gi 49175990 ref NC_000913.2 | - | 3683723 | 3687196 | 428.689654  | 395.0809424 | 489.1340498 | 514.3219013 | 359.4024288 | -0.124187538 | 0.262166304 | 0.0969211 |
| <b>bcsZ</b> | gi 49175990 ref NC_000913.2 | - | 3687178 | 3688284 | 77.22932429 | 89.32854867 | 74.42951942 | 91.6261822  | 63.089047   | 0.105486395  | 0.207503767 | 0.0702944 |
| <b>bcsB</b> | gi 49175990 ref NC_000913.2 | - | 3688291 | 3690630 | 237.1751614 | 196.5293234 | 199.1873614 | 200.7367317 | 215.2836558 | 0.103665254  | 0.139871683 | 0.0418239 |
| <b>bcsA</b> | gi 49175990 ref NC_000913.2 | - | 3690641 | 3693259 | 216.0782437 | 240.3435969 | 177.8072859 | 166.0648158 | 189.4545677 | 0.345994229  | 0.92562708  | 0.4496612 |
| <b>yhjR</b> | gi 49175990 ref NC_000913.2 | - | 3694020 | 3694208 | 173.2984809 | 185.2364036 | 190.3204077 | 160.3995223 | 148.2809227 | 0.109625291  | 0.191018564 | 0.0618295 |
| <b>bcsE</b> | gi 49175990 ref NC_000913.2 | + | 3694481 | 3696052 | 1331.562786 | 1265.120746 | 1517.53536  | 1578.385366 | 1272.3416   | -0.154821564 | 0.331383464 | 0.1302177 |
| <b>bcsF</b> | gi 49175990 ref NC_000913.2 | + | 3696049 | 3696240 | 148.8440117 | 151.0215454 | 182.3462029 | 143.6914151 | 150.420023  | -0.074124191 | 0.123577989 | 0.0368896 |
| <b>bcsG</b> | gi 49175990 ref NC_000913.2 | + | 3696237 | 3697916 | 968.2342674 | 886.1287039 | 902.7771147 | 834.060098  | 679.0034912 | 0.225229346  | 0.462383085 | 0.1939831 |
| <b>ldrD</b> | gi 49175990 ref NC_000913.2 | - | 3698003 | 3698110 | 124.6906975 | 134.8994394 | 88.97779728 | 70.97618219 | 110.6768367 | 0.51370109   | 1.48950046  | 0.8166022 |
| <b>yhjV</b> | gi 49175990 ref NC_000913.2 | + | 3698586 | 3699857 | 405.5603124 | 423.631552  | 394.8450286 | 473.0594743 | 504.5630446 | -0.158259359 | 0.273463074 | 0.1020023 |
| <b>dppF</b> | gi 49175990 ref NC_000913.2 | - | 3699887 | 3700891 | 782.853654  | 827.3078316 | 1490.534392 | 1260.304467 | 1256.487535 | -0.729236691 | 3.00403716  | 2.0184048 |
| <b>dppD</b> | gi 49175990 ref NC_000913.2 | - | 3700888 | 3701871 | 1024.2246   | 983.9818636 | 2019.312938 | 1573.11571  | 1436.153055 | -0.717534349 | 2.789093967 | 1.840045  |
| <b>dppC</b> | gi 49175990 ref NC_000913.2 | - | 3701882 | 3702784 | 1033.428363 | 1070.450344 | 1404.401872 | 1283.708306 | 1143.29381  | -0.277124929 | 0.689688919 | 0.3092004 |
| <b>dppB</b> | gi 49175990 ref NC_000913.2 | - | 3702794 | 3703813 | 886.3831126 | 924.1823571 | 889.1228427 | 737.7641986 | 628.5392362 | 0.276069945  | 0.266219942 | 0.2976012 |
| <b>dppA</b> | gi 49175990 ref NC_000913.2 | - | 3704121 | 3705728 | 4962.788014 | 4977.960611 | 5136.056829 | 6007.94284  | 4991.894162 | -0.117862053 | 0.201938855 | 0.0675504 |
| <b>eptB</b> | gi 49175990 ref NC_000913.2 | - | 3706807 | 3708498 | 1283.456297 | 1272.739533 | 1291.87007  | 1646.794499 | 1653.258681 | -0.270925594 | 0.592552502 | 0.2622281 |
| <b>yhjX</b> | gi 49175990 ref NC_000913.2 | - | 3708822 | 3710030 | 416.5027728 | 407.4551272 | 100.5283404 | 103.3962721 | 4183.544125 | -1.895506738 | 1.403302347 | 0.7611946 |
| <b>yhjY</b> | gi 49175990 ref NC_000913.2 | - | 3710259 | 3710957 | 326.583755  | 352.4098667 | 298.9518794 | 355.1988953 | 314.1523078 | 0.057004896  | 0.129358749 | 0.0378267 |
| <b>tag</b>  | gi 49175990 ref NC_000913.2 | + | 3711115 | 3711678 | 253.6086795 | 255.4983025 | 298.9866081 | 273.4496206 | 203.4635267 | -0.012363562 | 0.028437452 | 0.0017411 |
| <b>yiaC</b> | gi 49175990 ref NC_000913.2 | + | 3711675 | 3712115 | 162.897953  | 155.7469558 | 189.5342503 | 189.4045827 | 167.303567  | -0.183443185 | 0.37865732  | 0.1493159 |
| <b>bisC</b> | gi 49175990 ref NC_000913.2 | - | 3712084 | 3714417 | 661.5054388 | 615.4005362 | 619.18236   | 574.052212  | 541.9457816 | 0.158144283  | 0.293937383 | 0.113293  |
| <b>yiaD</b> | gi 49175990 ref NC_000913.2 | + | 3714570 | 3715229 | 283.3025655 | 282.0879759 | 119.926628  | 126.7942011 | 154.5206734 | 1.072836422  | 5.495105481 | 4.1729928 |
| <b>ghrB</b> | gi 49175990 ref NC_000913.2 | + | 3715333 | 3716307 | 1642.680664 | 1546.260491 | 1516.205776 | 1426.149774 | 1420.179213 | 0.144868296  | 0.263189537 | 0.0969652 |
| <b>yiaF</b> | gi 49175990 ref NC_000913.2 | - | 3716357 | 3717067 | 2290.863299 | 2476.192764 | 2569.165278 | 2243.483275 | 2107.946603 | 0.04478293   | 0.081355902 | 0.0204431 |
| <b>yiaG</b> | gi 49175990 ref NC_000913.2 | + | 3717501 | 3717791 | 442.8640565 | 452.1155584 | 271.420863  | 597.9068363 | 458.7227749 | -0.016287462 | 0.023525275 | 0.0005477 |
| <b>cspA</b> | gi 49175990 ref NC_000913.2 | + | 3718072 | 3718284 | 55140.41241 | 59747.94274 | 47546.81979 | 49047.02407 | 73746.55347 | -0.007577752 | 0.027819004 | 0.0014991 |
| <b>hokA</b> | gi 49175990 ref NC_000913.2 | - | 3718471 | 3718623 | 31.7990594  | 26.55129071 | 14.06503387 | 27.8400577  | 25.69546448 | 0.370018934  | 0.556200595 | 0.2409728 |
| <b>insJ</b> | gi 49175990 ref NC_000913.2 | + | 3718703 | 3719224 | 80.92048302 | 75.00545821 | 46.45184364 | 99.19073607 | 69.60929612 | 0.105946682  | 0.169207429 | 0.0533084 |
| <b>insK</b> | gi 49175990 ref NC_000913.2 | + | 3719221 | 3720072 | 86.38780177 | 87.38233944 | 49.19841405 | 68.5779713  | 115.8665612 | 0.131974826  | 0.23256212  | 0.0776899 |
| <b>glyS</b> | gi 49175990 ref NC_000913.2 | - | 3720351 | 3722420 | 4377.464564 | 4099.35158  | 4640.101152 | 3826.642577 | 3907.132725 | 0.058533891  | 0.06804424  | 0.016118  |
| <b>glyQ</b> | gi 49175990 ref NC_000913.2 | - | 3722430 | 3723341 | 1345.476229 | 1267.016168 | 1504.234535 | 1182.849143 | 912.5046948 | 0.150832028  | 0.222013206 | 0.0773895 |
| <b>ysaB</b> | gi 49175990 ref NC_000913.2 | - | 3723436 | 3723735 | 68.0794592  | 69.33785454 | 74.69792748 | 99.44667549 | 71.9930269  | -0.263197994 | 0.486704729 | 0.2053306 |
| <b>wecH</b> | gi 49175990 ref NC_000913.2 | + | 3723910 | 3724905 | 44.38595577 | 38.90354355 | 30.30432877 | 55.8170332  | 53.66354293 | -0.16813385  | 0.214232888 | 0.073582  |
| <b>yiaA</b> | gi 49175990 ref NC_000913.2 | - | 3724947 | 3725384 | 23.52921414 | 31.40236019 | 24.98233197 | 38.18791661 | 56.70420795 | -0.591037234 | 0.934166246 | 0.4539297 |
| <b>yiaB</b> | gi 49175990 ref NC_000913.2 | - | 3725430 | 3725771 | 4.439144513 | 3.786723196 | 5.60167069  | 7.858778192 | 9.997595208 | -0.903052275 | 0.755360724 | 0.3439111 |
| <b>xyiB</b> | gi 49175990 ref NC_000913.2 | - | 3725940 | 3727394 | 78.31636882 | 75.01644596 | 98.33058655 | 66.36305531 | 66.39821419 | 0.016834161  | 0           | 0         |

|             |                             |   |         |         |             |             |             |             |             |              |             |           |
|-------------|-----------------------------|---|---------|---------|-------------|-------------|-------------|-------------|-------------|--------------|-------------|-----------|
| <b>xyIA</b> | gi 49175990 ref NC_000913.2 | - | 3727466 | 3728788 | 169.5667989 | 143.3515185 | 154.2771158 | 163.7214249 | 179.3301618 | -0.066276816 | 0.125337087 | 0.037135  |
| <b>xyIF</b> | gi 49175990 ref NC_000913.2 | + | 3729154 | 3730146 | 33.00198952 | 41.84812673 | 46.51730043 | 55.83027987 | 39.47559081 | -0.36215997  | 0.596390321 | 0.2643142 |
| <b>xyIG</b> | gi 49175990 ref NC_000913.2 | + | 3730224 | 3731765 | 141.1456837 | 187.2244263 | 164.8949064 | 174.9335259 | 191.6669999 | -0.15182087  | 0.177983595 | 0.0563259 |
| <b>xyIH</b> | gi 49175990 ref NC_000913.2 | + | 3731743 | 3732924 | 73.46561452 | 64.54158336 | 71.55008274 | 66.22630012 | 70.65318256 | 0.008095632  | 0           | 0         |
| <b>xyIR</b> | gi 49175990 ref NC_000913.2 | + | 3733002 | 3734180 | 222.7594229 | 219.3958478 | 193.0332787 | 196.4166898 | 268.7610315 | 0.004516108  | 0.015715656 | 0         |
| <b>bax</b>  | gi 49175990 ref NC_000913.2 | - | 3734376 | 3735200 | 2390.507179 | 2624.37102  | 1922.630171 | 2567.435245 | 3226.621793 | -0.069826609 | 0.049593932 | 0.0081378 |
| <b>maiS</b> | gi 49175990 ref NC_000913.2 | + | 3735520 | 3737550 | 322.4931041 | 314.3722397 | 699.6226912 | 690.3301995 | 435.8395043 | -0.919341854 | 3.889380919 | 2.7656595 |
| <b>avtA</b> | gi 49175990 ref NC_000913.2 | + | 3737728 | 3738981 | 790.603725  | 793.090062  | 595.5912936 | 576.3014869 | 575.4861428 | 0.444342014  | 1.463870317 | 0.7989872 |
| <b>ysaA</b> | gi 49175990 ref NC_000913.2 | - | 3739132 | 3739605 | 270.8650875 | 254.5186131 | 982.469113  | 917.0312171 | 764.2193248 | -1.739922097 | 13.06243388 | 10.957669 |
| <b>yaJ</b>  | gi 49175990 ref NC_000913.2 | - | 3739707 | 3740555 | 359.3577358 | 322.8848026 | 282.4004381 | 234.6031854 | 298.1864542 | 0.34573873   | 0.847143553 | 0.3971622 |
| <b>yaK</b>  | gi 49175990 ref NC_000913.2 | + | 3740756 | 3741754 | 21.51898876 | 19.92779635 | 16.34563948 | 22.35718877 | 22.36822821 | 0.024780712  | 0           | 0         |
| <b>yaN</b>  | gi 49175990 ref NC_000913.2 | + | 3742827 | 3744104 | 11.53380892 | 18.10871562 | 17.08643222 | 16.76867023 | 12.46892988 | -0.092894911 | 0           | 0         |
| <b>yaO</b>  | gi 49175990 ref NC_000913.2 | + | 3744117 | 3745103 | 9.210716633 | 12.37744358 | 10.32284031 | 4.637946799 | 8.933069535 | 0.42489916   | 0.403338251 | 0.1637518 |
| <b>lyxK</b> | gi 49175990 ref NC_000913.2 | + | 3745107 | 3746603 | 25.12733133 | 26.60210617 | 24.05198616 | 30.11472325 | 22.55176048 | 0.00903759   | 0           | 0         |
| <b>yaQ</b>  | gi 49175990 ref NC_000913.2 | + | 3746600 | 3747262 | 14.29889687 | 17.11955918 | 11.01506538 | 12.4307202  | 19.95520577 | 0.091487957  | 0.12191073  | 0.0359921 |
| <b>yaR</b>  | gi 49175990 ref NC_000913.2 | + | 3747255 | 3748115 | 18.34835256 | 17.08051097 | 22.64110188 | 23.54321773 | 23.55515369 | -0.382257918 | 0.517463242 | 0.2218965 |
| <b>yaS</b>  | gi 49175990 ref NC_000913.2 | + | 3748109 | 3748804 | 35.41289737 | 33.22372067 | 49.76906318 | 34.94204883 | 39.32546758 | -0.24803048  | 0.435812646 | 0.1778877 |
| <b>yaT</b>  | gi 49175990 ref NC_000913.2 | - | 3749151 | 3749891 | 30.5238219  | 25.6032466  | 25.99292519 | 16.96287215 | 19.13556767 | 0.470464149  | 0.689276102 | 0.3091873 |
| <b>yaU</b>  | gi 49175990 ref NC_000913.2 | + | 3750015 | 3750989 | 140.457231  | 121.516699  | 120.2927542 | 160.1612829 | 159.1364756 | -0.15545183  | 0.275132626 | 0.1029688 |
| <b>yaV</b>  | gi 49175990 ref NC_000913.2 | - | 3750986 | 3752122 | 53.94931138 | 45.53911123 | 56.73600732 | 45.02492302 | 53.8010513  | -0.034099453 | 0.066008137 | 0.0154176 |
| <b>aldB</b> | gi 49175990 ref NC_000913.2 | - | 3752996 | 3754534 | 317.5444369 | 300.1116088 | 1391.124568 | 1194.866787 | 609.9988508 | -1.754656021 | 9.441667241 | 7.6830112 |
| <b>yaY</b>  | gi 49175990 ref NC_000913.2 | - | 3754699 | 3755850 | 12.68048512 | 11.37993701 | 17.46076229 | 20.15620126 | 20.16629524 | -0.666488742 | 1.052275385 | 0.5260812 |
| <b>selB</b> | gi 49175990 ref NC_000913.2 | - | 3756040 | 3757884 | 1311.544207 | 1186.263312 | 1897.109754 | 1439.71571  | 1301.576953 | -0.275978663 | 0.715366411 | 0.3189698 |
| <b>selA</b> | gi 49175990 ref NC_000913.2 | - | 3757881 | 3759272 | 706.8767399 | 669.5879521 | 1247.079754 | 963.2024304 | 856.2527055 | -0.545897008 | 1.845525416 | 1.08414   |
| <b>yibF</b> | gi 49175990 ref NC_000913.2 | - | 3759370 | 3759978 | 300.6831178 | 327.7189525 | 325.4611622 | 289.1913356 | 223.6330483 | 0.169534467  | 0.334047001 | 0.1317706 |
| <b>rhsA</b> | gi 49175990 ref NC_000913.2 | + | 3760206 | 3764339 | 291.2980255 | 309.6612932 | 321.4649252 | 314.1125606 | 396.7713964 | -0.208695861 | 0.410601131 | 0.1674779 |
| <b>yibA</b> | gi 49175990 ref NC_000913.2 | + | 3764360 | 3765202 | 45.47895546 | 43.67595862 | 66.01539752 | 78.06021885 | 37.52345505 | -0.429965447 | 0.835889639 | 0.3906254 |
| <b>yibH</b> | gi 49175990 ref NC_000913.2 | - | 3768266 | 3769402 | 78.45079292 | 92.18392678 | 42.94819528 | 42.79382995 | 63.57329522 | 0.748580834  | 2.45763289  | 1.3768778 |
| <b>yibI</b> | gi 49175990 ref NC_000913.2 | - | 3769405 | 3769767 | 23.78978994 | 26.61331253 | 23.16433981 | 16.82047066 | 10.34550689 | 0.593217079  | 0.941729637 | 0.4572965 |
| <b>mtIA</b> | gi 49175990 ref NC_000913.2 | + | 3770304 | 3772217 | 1016.936495 | 1079.960356 | 1419.700741 | 1047.421094 | 1092.757936 | -0.171929651 | 0.364603081 | 0.144032  |
| <b>mtID</b> | gi 49175990 ref NC_000913.2 | + | 3772447 | 3773595 | 1391.842911 | 1438.976533 | 1882.822204 | 1444.25821  | 1458.459743 | -0.16320501  | 0.333784495 | 0.1317706 |
| <b>mtIR</b> | gi 49175990 ref NC_000913.2 | + | 3773595 | 3774182 | 626.4757024 | 641.1294497 | 893.7952783 | 865.446711  | 741.7211199 | -0.393041919 | 1.170554497 | 0.6024274 |
| <b>yibT</b> | gi 49175990 ref NC_000913.2 | - | 3774194 | 3774403 | 422.3782838 | 389.3822487 | 493.8274079 | 432.6993992 | 330.2394808 | -0.020829148 | 0.067545639 | 0.0160372 |
| <b>yibL</b> | gi 49175990 ref NC_000913.2 | + | 3774688 | 3775050 | 331.3743907 | 387.5895811 | 281.3468716 | 380.0601527 | 468.3553105 | -0.107579672 | 0.098315211 | 0.0262976 |
| <b>lidP</b> | gi 49175990 ref NC_000913.2 | + | 3775422 | 3777077 | 191.2747173 | 184.2438487 | 268.9773678 | 212.217826  | 274.647119  | -0.413886488 | 1.143730107 | 0.5853541 |
| <b>lidR</b> | gi 49175990 ref NC_000913.2 | + | 3777077 | 3777853 | 143.1830893 | 144.3703479 | 154.7919594 | 110.2724031 | 160.1714258 | 0.026197024  | 0.032022493 | 0.0030156 |
| <b>lidL</b> | gi 49175990 ref NC_000913.2 | + | 3777850 | 3779040 | 355.0278526 | 310.525765  | 307.3427415 | 242.4656506 | 299.3913112 | 0.25813568   | 0.524615654 | 0.2249696 |
| <b>trmL</b> | gi 49175990 ref NC_000913.2 | + | 3779238 | 3779711 | 325.8105808 | 302.0027633 | 341.9232053 | 285.0032467 | 331.9609424 | -0.010328225 | 0.035294012 | 0.0036811 |
| <b>cysE</b> | gi 49175990 ref NC_000913.2 | - | 3779764 | 3780585 | 1477.906874 | 1423.745806 | 1995.273496 | 1885.85048  | 1968.631016 | -0.419320409 | 1.180352585 | 0.6098523 |
| <b>gpsA</b> | gi 49175990 ref NC_000913.2 | - | 3780665 | 3781684 | 3005.646756 | 2829.455904 | 4511.473217 | 3739.201194 | 3885.78908  | -0.453801583 | 1.40928662  | 0.7651708 |
| <b>secB</b> | gi 49175990 ref NC_000913.2 | - | 3781684 | 3782151 | 3710.176699 | 3798.304356 | 5589.984085 | 5567.795845 | 6979.066344 | -0.696596319 | 2.427308345 | 1.5416698 |
| <b>grxC</b> | gi 49175990 ref NC_000913.2 | - | 3782214 | 3782465 | 1208.230133 | 1246.163546 | 1380.472027 | 1528.156588 | 1729.444459 | -0.345830898 | 0.85152586  | 0.3990682 |
| <b>yibN</b> | gi 49175990 ref NC_000913.2 | - | 3782607 | 3783038 | 997.69855   | 1159.788048 | 1116.251268 | 1097.811328 | 1401.793656 | -0.187274403 | 0.319959192 | 0.1244053 |
| <b>gpmM</b> | gi 49175990 ref NC_000913.2 | + | 3783283 | 3784827 | 7064.898052 | 6623.951656 | 14143.54471 | 11993.03694 | 12249.44633 | -0.885006952 | 3.822276085 | 2.707906  |
| <b>envC</b> | gi 49175990 ref NC_000913.2 | + | 3784861 | 3786120 | 1176.847439 | 1156.858363 | 1189.178278 | 1228.86524  | 1404.182371 | -0.129452156 | 0.244446669 | 0.0890723 |
| <b>yibQ</b> | gi 49175990 ref NC_000913.2 | + | 3786124 | 3787083 | 592.6238288 | 567.9636658 | 549.4964175 | 541.6293475 | 616.7765554 | 0.031023583  | 0.04794268  | 0.0078702 |
| <b>yibD</b> | gi 49175990 ref NC_000913.2 | - | 3787070 | 3788104 | 60.02760498 | 56.96848423 | 61.0145593  | 52.87485909 | 67.15045996 | -0.037226474 | 0.044671966 | 0.0063499 |
| <b>tdh</b>  | gi 49175990 ref NC_000913.2 | - | 3788343 | 3789368 | 2646.376055 | 2657.571087 | 3120.602991 | 2607.81131  | 2161.994296 | 0.025903802  | 0.021376548 | 0.0001819 |
| <b>kbl</b>  | gi 49175990 ref NC_000913.2 | - | 3789378 | 3790574 | 2429.671769 | 2205.412378 | 3509.732215 | 2458.845476 | 1982.674888 | -0.154274172 | 0.341473124 | 0.1341942 |
| <b>yibB</b> | gi 49175990 ref NC_000913.2 | - | 3790849 | 3791706 | 227.0557809 | 285.9898607 | 172.879344  | 331.2813789 | 273.601998  | 0.070717172  | 0.011798912 | 0         |
| <b>rfaD</b> | gi 49175990 ref NC_000913.2 | + | 3792010 | 3792942 | 1465.768888 | 1473.156208 | 1587.954065 | 1646.822361 | 1409.112489 | -0.07378431  | 0.125805809 | 0.037291  |
| <b>rfaF</b> | gi 49175990 ref NC_000913.2 | + | 3792952 | 3793998 | 1069.236642 | 1159.754734 | 1269.038599 | 1223.02638  | 950.5002531 | -0.045592167 | 0.065904225 | 0.0154176 |
| <b>rfaC</b> | gi 49175990 ref NC_000913.2 | + | 3794002 | 3794961 | 642.4911913 | 612.6023743 | 596.947666  | 698.0504386 | 464.8513077 | 0.105343313  | 0.175714881 | 0.055256  |
| <b>rfaL</b> | gi 49175990 ref NC_000913.2 | + | 3794971 | 3796230 | 216.554038  | 206.084217  | 157.2320105 | 340.1754356 | 280.2789553 | -0.31677997  | 0.542139404 | 0.2323211 |
| <b>waaU</b> | gi 49175990 ref NC_000913.2 | - | 3796262 | 3797335 | 104.851318  | 126.391656  | 87.66639671 | 179.7395294 | 114.6083568 | -0.184609574 | 0.202372108 | 0.0676929 |
| <b>rfaZ</b> | gi 49175990 ref NC_000913.2 | - | 3797368 | 3798219 | 89.52510094 | 91.18407257 | 88.24690802 | 86.13022587 | 54.2724986  | 0.253534967  | 0.458120044 | 0.1917807 |
| <b>rfaY</b> | gi 49175990 ref NC_000913.2 | - | 3798290 | 3798988 | 114.8086956 | 114.9232947 | 71.35663639 | 125.0099746 | 85.41370918 | 0.274007357  | 0.581856547 | 0.2556955 |

|             |                             |   |         |         |             |             |             |             |             |              |             |           |
|-------------|-----------------------------|---|---------|---------|-------------|-------------|-------------|-------------|-------------|--------------|-------------|-----------|
| <b>rfaJ</b> | gi 49175990 ref NC_000913.2 | - | 3799006 | 3800022 | 93.9345533  | 95.93419183 | 45.44121459 | 129.0339171 | 65.35571053 | 0.216036273  | 0.362640646 | 0.1431584 |
| <b>rfaI</b> | gi 49175990 ref NC_000913.2 | - | 3800062 | 3801081 | 162.8352352 | 197.6369184 | 123.7647506 | 176.5400022 | 100.2773088 | 0.401611607  | 1.029458554 | 0.5154106 |
| <b>rfaB</b> | gi 49175990 ref NC_000913.2 | - | 3801081 | 3802160 | 229.6382104 | 230.802146  | 134.4925873 | 275.1951286 | 225.3530002 | 0.094091401  | 0.192535166 | 0.062551  |
| <b>rfaS</b> | gi 49175990 ref NC_000913.2 | - | 3802204 | 3803139 | 63.66804166 | 64.58736807 | 44.04281593 | 96.01015948 | 87.27381425 | -0.269483231 | 0.363677341 | 0.1434578 |
| <b>rfaP</b> | gi 49175990 ref NC_000913.2 | - | 3803176 | 3803973 | 180.133022  | 199.4986722 | 153.6625875 | 238.3617875 | 191.856967  | -0.064690651 | 0.043327643 | 0.0060195 |
| <b>rfaG</b> | gi 49175990 ref NC_000913.2 | - | 3803966 | 3805090 | 354.440785  | 371.393077  | 236.3029229 | 455.4155541 | 279.6048606 | 0.138097502  | 0.290376376 | 0.1115039 |
| <b>rfaQ</b> | gi 49175990 ref NC_000913.2 | - | 3805087 | 3806121 | 485.2501274 | 580.4139738 | 292.5102662 | 626.989054  | 445.3866284 | 0.175767303  | 0.427403836 | 0.1750431 |
| <b>waaA</b> | gi 49175990 ref NC_000913.2 | + | 3806563 | 3807840 | 838.6455059 | 820.6229494 | 769.7229769 | 770.3074894 | 846.7725331 | 0.061092102  | 0.114430683 | 0.032275  |
| <b>coaD</b> | gi 49175990 ref NC_000913.2 | + | 3807848 | 3808327 | 249.5929209 | 270.7273517 | 242.5938931 | 216.5315148 | 240.0000104 | 0.150856869  | 0.318377864 | 0.1240538 |
| <b>mutM</b> | gi 49175990 ref NC_000913.2 | - | 3808366 | 3809175 | 195.7619174 | 184.2343272 | 160.3278666 | 158.0325007 | 141.4907173 | 0.321161715  | 0.737991973 | 0.3324689 |
| <b>rpmG</b> | gi 49175990 ref NC_000913.2 | - | 3809273 | 3809440 | 3124.922263 | 3500.107449 | 2626.510658 | 2665.275383 | 3941.09866  | 0.078307846  | 0.188818498 | 0.0611353 |
| <b>rpmB</b> | gi 49175990 ref NC_000913.2 | - | 3809461 | 3809697 | 10341.05666 | 11582.05592 | 7153.327197 | 7557.882711 | 10576.21548 | 0.350706254  | 0.941161852 | 0.4572842 |
| <b>yicR</b> | gi 49175990 ref NC_000913.2 | - | 3809914 | 3810582 | 1244.298454 | 1497.938546 | 1610.197077 | 1758.105545 | 2251.968013 | -0.487899153 | 1.203404652 | 0.622874  |
| <b>dfp</b>  | gi 49175990 ref NC_000913.2 | + | 3810754 | 3811974 | 744.0181094 | 871.0479057 | 719.2555868 | 671.7706942 | 819.7401833 | 0.107709375  | 0.271607348 | 0.1008814 |
| <b>dut</b>  | gi 49175990 ref NC_000913.2 | + | 3811955 | 3812410 | 776.7021748 | 783.5946134 | 634.6679546 | 653.7503913 | 778.1969854 | 0.172323085  | 0.404148782 | 0.1640067 |
| <b>slmA</b> | gi 49175990 ref NC_000913.2 | + | 3812517 | 3813113 | 401.9421729 | 398.9133017 | 229.3195413 | 264.7683275 | 0.460174951 | 1.363420971  | 0.738899    |           |
| <b>pyrE</b> | gi 49175990 ref NC_000913.2 | - | 3813150 | 3813791 | 32.7555493  | 47.58564943 | 27.63466693 | 41.54281403 | 60.08237546 | -0.163556259 | 0.104162416 | 0.0277229 |
| <b>rph</b>  | gi 49175990 ref NC_000913.2 | - | 3813886 | 3814572 | 989.5611278 | 939.3351163 | 643.9934469 | 637.0293339 | 830.799318  | 0.455195467  | 1.461044054 | 0.7982741 |
| <b>yicC</b> | gi 49175990 ref NC_000913.2 | + | 3814699 | 3815562 | 1136.401946 | 1136.920662 | 1131.691219 | 1080.884014 | 1165.411071 | 0.013979749  | 0.025380516 | 0.0007012 |
| <b>dinD</b> | gi 49175990 ref NC_000913.2 | + | 3815783 | 3816607 | 181.6866293 | 182.361107  | 159.5795191 | 356.5900076 | 198.8860464 | -0.413384638 | 0.74831748  | 0.3398002 |
| <b>yicG</b> | gi 49175990 ref NC_000913.2 | + | 3816897 | 3817514 | 556.4664245 | 564.1903089 | 503.7004143 | 386.0444675 | 507.9549461 | 0.270503567  | 0.65193937  | 0.2917747 |
| <b>ligB</b> | gi 49175990 ref NC_000913.2 | - | 3817511 | 3819193 | 132.7132695 | 152.9717483 | 157.3574073 | 136.8529095 | 131.3864711 | -0.000679961 | 0.012189055 | 0         |
| <b>gmk</b>  | gi 49175990 ref NC_000913.2 | + | 3819451 | 3820074 | 1556.63381  | 1877.864723 | 1327.329879 | 1505.645638 | 1566.912996 | 0.193109841  | 0.504329005 | 0.2147686 |
| <b>rhoZ</b> | gi 49175990 ref NC_000913.2 | + | 3820129 | 3820404 | 1018.963071 | 1040.999604 | 738.1302245 | 705.4641622 | 948.5562919 | 0.360572904  | 1.02184717  | 0.5109224 |
| <b>spoT</b> | gi 49175990 ref NC_000913.2 | + | 3820423 | 3822531 | 2878.555097 | 2914.974116 | 2198.696899 | 2237.8824   | 2481.106365 | 0.323705438  | 0.845748597 | 0.3966027 |
| <b>trmH</b> | gi 49175990 ref NC_000913.2 | + | 3822538 | 3823227 | 771.0483548 | 772.1934261 | 668.9814403 | 732.0231333 | 706.6895856 | 0.131448464  | 0.289462695 | 0.1110664 |
| <b>recG</b> | gi 49175990 ref NC_000913.2 | + | 3823233 | 3825314 | 763.8627163 | 683.8091221 | 735.0628845 | 705.310805  | 776.1354634 | -0.014311328 | 0.046153288 | 0.0071319 |
| <b>gltS</b> | gi 49175990 ref NC_000913.2 | - | 3825483 | 3826688 | 503.9298615 | 536.6684106 | 620.3374183 | 598.5665401 | 474.8454038 | -0.119120373 | 0.216326043 | 0.0749067 |
| <b>xanP</b> | gi 49175990 ref NC_000913.2 | + | 3826968 | 3828359 | 524.5276368 | 494.8211511 | 1038.987199 | 1217.751297 | 362.3448121 | -0.753723461 | 1.778232836 | 1.0381366 |
| <b>yicH</b> | gi 49175990 ref NC_000913.2 | + | 3828480 | 3830189 | 982.0372882 | 919.3826234 | 751.2857583 | 886.5728563 | 748.3393452 | 0.262450096  | 0.651025201 | 0.2917747 |
| <b>yicI</b> | gi 49175990 ref NC_000913.2 | - | 3830242 | 3832560 | 168.590468  | 160.4941878 | 185.437588  | 177.1197909 | 160.5679714 | -0.072432688 | 0.131418106 | 0.0394194 |
| <b>yicJ</b> | gi 49175990 ref NC_000913.2 | - | 3832570 | 3833952 | 30.86328532 | 31.34287704 | 32.04969199 | 35.83597834 | 34.76725928 | -0.140997529 | 0.150629632 | 0.0460009 |
| <b>setC</b> | gi 49175990 ref NC_000913.2 | + | 3834976 | 3836160 | 31.477437   | 32.29511927 | 17.88411632 | 28.99984434 | 26.85246924 | 0.357781563  | 0.581489925 | 0.2555548 |
| <b>yicL</b> | gi 49175990 ref NC_000913.2 | + | 3836271 | 3837194 | 349.1139905 | 398.9769993 | 305.1584302 | 307.1839939 | 300.6600753 | 0.279216854  | 0.773675482 | 0.353532  |
| <b>nlpA</b> | gi 49175990 ref NC_000913.2 | - | 3837198 | 3838016 | 162.5160645 | 154.7946788 | 127.7836982 | 154.7520804 | 134.6760639 | 0.193921761  | 0.386965128 | 0.1543669 |
| <b>yicS</b> | gi 49175990 ref NC_000913.2 | + | 3838238 | 3838531 | 85.76609964 | 86.43122363 | 54.38983995 | 108.2162879 | 80.78767443 | 0.063093486  | 0.118206733 | 0.0338554 |
| <b>nepI</b> | gi 49175990 ref NC_000913.2 | - | 3838572 | 3839762 | 442.2283105 | 452.1162126 | 228.4718667 | 292.169191  | 197.7781725 | 0.894308452  | 4.099349767 | 2.9458014 |
| <b>yicN</b> | gi 49175990 ref NC_000913.2 | - | 3839973 | 3840425 | 211.0827877 | 230.8380161 | 234.6194545 | 219.7981244 | 219.9129548 | -0.033368076 | 0.029773394 | 0.0018086 |
| <b>yicO</b> | gi 49175990 ref NC_000913.2 | - | 3840478 | 3841812 | 34.69617691 | 22.70381426 | 21.32806798 | 14.83883384 | 29.98042207 | 0.420428162  | 0.529221829 | 0.2272311 |
| <b>ade</b>  | gi 49175990 ref NC_000913.2 | + | 3841987 | 3843753 | 336.1850459 | 347.6417694 | 311.8332971 | 329.5170503 | 298.4899394 | 0.121306918  | 0.251797866 | 0.0917711 |
| <b>uhpT</b> | gi 49175990 ref NC_000913.2 | - | 3843799 | 3845190 | 720.4044065 | 757.018999  | 537.9949311 | 417.3643049 | 493.5243618 | 0.614674477  | 2.276475601 | 1.4155241 |
| <b>uhpC</b> | gi 49175990 ref NC_000913.2 | - | 3845328 | 3846647 | 110.3764961 | 87.29623673 | 86.66458452 | 87.59421065 | 111.8885087 | 0.074373344  | 0.07823207  | 0.0192386 |
| <b>uhpB</b> | gi 49175990 ref NC_000913.2 | - | 3846657 | 3848159 | 205.7997797 | 197.5395947 | 134.0262651 | 121.2636044 | 146.7807618 | 0.594930066  | 1.9209533   | 1.1409856 |
| <b>uhpA</b> | gi 49175990 ref NC_000913.2 | - | 3848159 | 3848749 | 250.1446972 | 278.3370804 | 231.5490159 | 159.6415768 | 228.627068  | 0.349143621  | 0.867130994 | 0.4101162 |
| <b>ilvN</b> | gi 49175990 ref NC_000913.2 | - | 3848825 | 3849115 | 70.3152739  | 80.77640844 | 42.20478589 | 34.87818534 | 39.25474842 | 0.949579295  | 3.654229186 | 2.5693596 |
| <b>ilvB</b> | gi 49175990 ref NC_000913.2 | - | 3849119 | 3850807 | 482.0780293 | 478.6976867 | 303.5381287 | 255.8558609 | 303.8817502 | 0.744325134  | 3.197884296 | 2.1724452 |
| <b>ivbL</b> | gi 49175990 ref NC_000913.2 | - | 3850913 | 3851011 | 1581.729118 | 1656.489682 | 3298.068356 | 6085.452525 | 7928.619489 | -1.873220344 | 8.995563222 | 7.2271395 |
| <b>tisB</b> | gi 49175990 ref NC_000913.2 | + | 3851576 | 3851665 | 1282.198706 | 1269.889498 | 638.9840369 | 441.1454054 | 683.8957316 | 1.125705025  | 5.982801547 | 4.5903711 |
| <b>emrD</b> | gi 49175990 ref NC_000913.2 | + | 3851945 | 3853129 | 656.2155053 | 655.365282  | 530.3054358 | 492.209014  | 465.6626023 | 0.408141736  | 1.275496464 | 0.6779974 |
| <b>yidF</b> | gi 49175990 ref NC_000913.2 | - | 3853137 | 3853634 | 191.2590586 | 185.1957963 | 274.9747652 | 272.5825721 | 327.296712  | -0.631035357 | 2.167746235 | 1.3280853 |
| <b>yidG</b> | gi 49175990 ref NC_000913.2 | - | 3853631 | 3853993 | 99.64042116 | 100.6794876 | 158.4778317 | 93.61137766 | 161.2166565 | -0.450048021 | 1.094780179 | 0.5552731 |
| <b>yidH</b> | gi 49175990 ref NC_000913.2 | - | 3853983 | 3854330 | 83.86006705 | 109.3207242 | 110.5696836 | 80.92772054 | 85.38116433 | 0.045949689  | 0.091978606 | 0.023893  |
| <b>yidI</b> | gi 49175990 ref NC_000913.2 | + | 3854438 | 3854887 | 94.60935929 | 94.97824483 | 95.93383317 | 110.9047831 | 107.6514625 | -0.150789159 | 0.258298421 | 0.0943277 |
| <b>yidJ</b> | gi 49175990 ref NC_000913.2 | - | 3854934 | 3856427 | 59.81065639 | 62.69789701 | 76.68490704 | 57.1386892  | 83.87090215 | -0.22462324  | 0.376990172 | 0.1485519 |
| <b>yidK</b> | gi 49175990 ref NC_000913.2 | - | 3856424 | 3858139 | 29.53184996 | 31.35295522 | 34.35197328 | 32.51848361 | 30.36174465 | -0.091365363 | 0.078069144 | 0.0192386 |
| <b>yidL</b> | gi 49175990 ref NC_000913.2 | + | 3858306 | 3859199 | 23.66193988 | 17.99410658 | 11.34379904 | 20.1370992  | 24.45195413 | 0.165570297  | 0.158681382 | 0.0492779 |
| <b>yidP</b> | gi 49175990 ref NC_000913.2 | + | 3861922 | 3862638 | 12.65191718 | 21.9318355  | 17.39142821 | 17.97004848 | 20.1351829  | -0.150353906 | 0.070032155 | 0.0170551 |

|             |                             |   |         |         |             |             |             |             |             |              |             |           |
|-------------|-----------------------------|---|---------|---------|-------------|-------------|-------------|-------------|-------------|--------------|-------------|-----------|
| <b>yidE</b> | gi 49175990 ref NC_000913.2 | - | 3862635 | 3864296 | 586.8219375 | 583.1773149 | 900.7864496 | 947.2252866 | 816.8127366 | -0.600476462 | 2.278318584 | 1.4155241 |
| <b>ibpB</b> | gi 49175990 ref NC_000913.2 | - | 3864492 | 3864920 | 101.311317  | 87.32639815 | 48.07057645 | 50.50712439 | 58.18685364 | 0.864775583  | 3.20598405  | 2.1758532 |
| <b>ibpA</b> | gi 49175990 ref NC_000913.2 | - | 3865032 | 3865445 | 199.6214902 | 226.103724  | 145.0650534 | 145.9082377 | 184.7766137 | 0.401896185  | 1.161252047 | 0.595457  |
| <b>yidQ</b> | gi 49175990 ref NC_000913.2 | + | 3865751 | 3866083 | 676.2905396 | 699.0726952 | 997.8035484 | 977.7225433 | 1057.699257 | -0.561646502 | 1.941393441 | 1.1562555 |
| <b>yidR</b> | gi 49175990 ref NC_000913.2 | - | 3866085 | 3867332 | 705.259541  | 629.6688919 | 776.259541  | 760.2280219 | 831.094101  | -0.226998655 | 0.587807654 | 0.2587763 |
| <b>cbrA</b> | gi 49175990 ref NC_000913.2 | + | 3867400 | 3868464 | 36.28601452 | 29.39141695 | 25.9563023  | 43.46903562 | 35.88588513 | -0.088197186 | 0.078428464 | 0.0192386 |
| <b>dgoT</b> | gi 49175990 ref NC_000913.2 | - | 3868461 | 3869753 | 42.47337749 | 52.29448503 | 43.46473253 | 34.88918049 | 39.26691976 | 0.256552541  | 0.462442422 | 0.1939831 |
| <b>dgoD</b> | gi 49175990 ref NC_000913.2 | - | 3869873 | 3871021 | 67.07816903 | 60.75274988 | 66.20282488 | 71.5769788  | 52.96579603 | 0.022416729  | 0.000766441 | 0         |
| <b>dgoA</b> | gi 49175990 ref NC_000913.2 | - | 3871018 | 3871635 | 36.49618737 | 37.9982057  | 44.66252917 | 37.05880168 | 34.89813341 | -0.055880925 | 0.058242785 | 0.0110921 |
| <b>dgoK</b> | gi 49175990 ref NC_000913.2 | - | 3871619 | 3872497 | 103.0083088 | 95.90106861 | 87.88703053 | 69.53832152 | 54.18448046 | 0.520160386  | 1.28436234  | 0.6834737 |
| <b>dgoR</b> | gi 49175990 ref NC_000913.2 | - | 3872494 | 3873183 | 132.8970438 | 143.4472427 | 95.024156   | 86.30805331 | 73.137158   | 0.701719036  | 2.550877152 | 1.6425307 |
| <b>yidX</b> | gi 49175990 ref NC_000913.2 | + | 3873461 | 3874117 | 115.800298  | 161.596209  | 110.814559  | 134.475258  | 142.2860689 | 0.04929354   | 0.173977577 | 0.0547987 |
| <b>yidA</b> | gi 49175990 ref NC_000913.2 | - | 3874163 | 3874975 | 927.9212001 | 831.9800485 | 1169.543745 | 975.5817131 | 1030.943182 | -0.243176113 | 0.638070614 | 0.2848739 |
| <b>yidB</b> | gi 49175990 ref NC_000913.2 | - | 3875090 | 3875488 | 102.7549609 | 105.4342165 | 69.91118264 | 62.79646026 | 56.24678364 | 0.728244289  | 2.566452392 | 1.655508  |
| <b>gyrB</b> | gi 49175990 ref NC_000913.2 | - | 3875728 | 3878142 | 3698.529512 | 3441.128986 | 3572.439915 | 3330.932672 | 3101.766958 | 0.114107529  | 0.187136904 | 0.0606671 |
| <b>recF</b> | gi 49175990 ref NC_000913.2 | - | 3878171 | 3879244 | 667.3796104 | 705.372041  | 713.7982438 | 688.4693999 | 736.9137775 | -0.062409044 | 0.092848293 | 0.0243883 |
| <b>dnaN</b> | gi 49175990 ref NC_000913.2 | - | 3879244 | 3880344 | 1582.562624 | 1564.330187 | 1472.812436 | 1428.460457 | 1606.171909 | 0.066759654  | 0.119354708 | 0.034732  |
| <b>dnaA</b> | gi 49175990 ref NC_000913.2 | - | 3880349 | 3881752 | 2205.462621 | 2119.00659  | 1979.487698 | 1995.623963 | 1952.976253 | 0.135823637  | 0.249978479 | 0.091054  |
| <b>rpmH</b> | gi 49175990 ref NC_000913.2 | + | 3882359 | 3882499 | 8757.826561 | 8325.071092 | 5806.190348 | 4462.79247  | 8406.538253 | 0.458525434  | 1.116753374 | 0.5675368 |
| <b>mpA</b>  | gi 49175990 ref NC_000913.2 | + | 3882516 | 3882875 | 2114.425083 | 2133.277243 | 1351.465006 | 1441.983256 | 1907.560175 | 0.42680543   | 1.196595883 | 0.6184937 |
| <b>yidD</b> | gi 49175990 ref NC_000913.2 | + | 3882839 | 3883096 | 1903.770141 | 1867.3164   | 1312.652249 | 1262.680119 | 1710.185463 | 0.397029288  | 1.091665208 | 0.5533468 |
| <b>yidC</b> | gi 49175990 ref NC_000913.2 | + | 3883099 | 3884745 | 8151.963503 | 7969.85511  | 6002.569335 | 5615.001684 | 7769.769638 | 0.316626214  | 0.753219434 | 0.3422369 |
| <b>mnmE</b> | gi 49175990 ref NC_000913.2 | + | 3884851 | 3886215 | 769.9099939 | 726.5747807 | 580.8590487 | 589.5951261 | 496.0489058 | 0.441452645  | 1.347890037 | 0.7292017 |
| <b>tnaC</b> | gi 49175990 ref NC_000913.2 | + | 3886458 | 3886532 | 681.9266434 | 641.0907835 | 2695.828815 | 4413.209149 | 3030.052449 | -2.361071486 | 16.80895241 | 14.375129 |
| <b>tnaA</b> | gi 49175990 ref NC_000913.2 | + | 3886753 | 3888168 | 5729.962275 | 4994.039955 | 21635.38617 | 26825.75022 | 8958.160004 | -1.805822924 | 7.295114324 | 5.7533858 |
| <b>tnaB</b> | gi 49175990 ref NC_000913.2 | + | 3888259 | 3889506 | 858.8882539 | 828.2145926 | 3378.216545 | 3825.734817 | 1597.197539 | -1.781130624 | 8.323702118 | 6.6869156 |
| <b>mdtL</b> | gi 49175990 ref NC_000913.2 | + | 3889638 | 3890813 | 232.7894453 | 190.8264016 | 237.7698423 | 280.0443769 | 231.2368463 | -0.214262221 | 0.497062422 | 0.2110186 |
| <b>yidZ</b> | gi 49175990 ref NC_000913.2 | + | 3890788 | 3891747 | 278.3972399 | 264.9719289 | 327.7755949 | 334.0885699 | 292.804794  | -0.27608272  | 0.69306584  | 0.3103556 |
| <b>yieE</b> | gi 49175990 ref NC_000913.2 | + | 3891904 | 3892653 | 1597.002439 | 1611.83075  | 2418.964782 | 2721.990344 | 2510.487614 | -0.674011793 | 2.36830812  | 1.4947902 |
| <b>yieF</b> | gi 49175990 ref NC_000913.2 | + | 3892675 | 3893241 | 680.921055  | 796.9621703 | 1197.655991 | 1193.887082 | 982.9317929 | -0.623522981 | 2.132068419 | 1.3010285 |
| <b>purP</b> | gi 49175990 ref NC_000913.2 | - | 3893295 | 3894632 | 1007.16955  | 972.5865466 | 1024.251595 | 1247.328969 | 798.0450306 | -0.042742935 | 0.071736762 | 0.0170551 |
| <b>yieH</b> | gi 49175990 ref NC_000913.2 | + | 3894797 | 3895462 | 134.1106741 | 147.2533766 | 126.8618233 | 184.5835264 | 143.692361  | -0.132286811 | 0.172569192 | 0.0542966 |
| <b>cbrB</b> | gi 49175990 ref NC_000913.2 | + | 3895529 | 3895996 | 30.88713797 | 44.73258214 | 42.29360423 | 45.79849979 | 31.65209558 | -0.114034057 | 0.096832603 | 0.0259943 |
| <b>cbrC</b> | gi 49175990 ref NC_000913.2 | + | 3896045 | 3896632 | 101.9192431 | 113.0618209 | 119.1437607 | 105.5005283 | 112.1839817 | -0.071281184 | 0.09130828  | 0.023835  |
| <b>yieK</b> | gi 49175990 ref NC_000913.2 | + | 3896694 | 3897416 | 52.67819552 | 44.59050111 | 60.28835299 | 53.1486395  | 35.14216277 | 0.000558972  | 0.023850726 | 0.0005477 |
| <b>yieL</b> | gi 49175990 ref NC_000913.2 | - | 3897431 | 3898600 | 23.4320673  | 33.31741836 | 35.50794277 | 25.97527586 | 33.59652438 | -0.18751325  | 0.204084289 | 0.0682219 |
| <b>bgIH</b> | gi 49175990 ref NC_000913.2 | - | 3898627 | 3900243 | 24.96659026 | 29.47552306 | 21.64239581 | 30.12785775 | 25.8143345  | 0.049150065  | 0.071846358 | 0.0170551 |
| <b>bgIB</b> | gi 49175990 ref NC_000913.2 | - | 3900312 | 3901724 | 33.42740102 | 21.7548931  | 19.05289505 | 24.64974963 | 27.90416923 | 0.241165649  | 0.269863145 | 0.0999127 |
| <b>bgIF</b> | gi 49175990 ref NC_000913.2 | - | 3901743 | 3903620 | 1063.021207 | 1121.74907  | 1010.736552 | 1342.933283 | 1343.637487 | -0.195522852 | 0.35293654  | 0.1402157 |
| <b>bgIG</b> | gi 49175990 ref NC_000913.2 | - | 3903754 | 3904590 | 10.30428115 | 16.20413742 | 11.2890935  | 17.95171322 | 24.41573062 | -0.489017009 | 0.47923502  | 0.2015743 |
| <b>phoU</b> | gi 49175990 ref NC_000913.2 | - | 3904876 | 3905601 | 547.7039244 | 451.0694635 | 369.795323  | 311.8954106 | 357.7731051 | 0.559228708  | 1.808602401 | 1.0576473 |
| <b>pstB</b> | gi 49175990 ref NC_000913.2 | - | 3905616 | 3906389 | 460.4004512 | 404.5578321 | 370.4998925 | 384.6045195 | 421.6192293 | 0.154721632  | 0.288537081 | 0.110308  |
| <b>pstA</b> | gi 49175990 ref NC_000913.2 | - | 3905572 | 3907462 | 236.0985678 | 226.0325271 | 203.6494944 | 176.0714727 | 160.6227047 | 0.374637745  | 0.913934442 | 0.4415479 |
| <b>pstC</b> | gi 49175990 ref NC_000913.2 | - | 3907462 | 3908421 | 266.6041335 | 238.3509624 | 231.9234356 | 207.5376865 | 222.0985167 | 0.214230461  | 0.419076738 | 0.1714563 |
| <b>pstS</b> | gi 49175990 ref NC_000913.2 | - | 3908508 | 3909548 | 476.1533547 | 509.125616  | 295.8467926 | 279.2765276 | 306.1546902 | 0.736963332  | 3.271442865 | 2.2320714 |
| <b>glmS</b> | gi 49175990 ref NC_000913.2 | - | 3909862 | 3911691 | 5389.008398 | 4980.770524 | 3825.899611 | 3412.894287 | 3563.783353 | 0.542228055  | 1.753674643 | 1.0202756 |
| <b>glmU</b> | gi 49175990 ref NC_000913.2 | - | 3911853 | 3913223 | 5213.994511 | 5131.820912 | 4117.612225 | 3554.177929 | 3679.362324 | 0.460380676  | 1.368969699 | 0.7413265 |
| <b>atpC</b> | gi 49175990 ref NC_000913.2 | - | 3913576 | 3913995 | 3802.143607 | 4071.872167 | 2819.329502 | 2777.124804 | 2881.69868  | 0.468180716  | 1.569887249 | 0.8790509 |
| <b>atpD</b> | gi 49175990 ref NC_000913.2 | - | 3914016 | 3915398 | 10082.90747 | 9646.262305 | 7909.153583 | 6594.727718 | 6613.895355 | 0.502947821  | 1.457948035 | 0.7974161 |
| <b>atpG</b> | gi 49175990 ref NC_000913.2 | - | 3915425 | 3916288 | 3821.869518 | 3906.582142 | 3179.531744 | 2460.135025 | 3016.245805 | 0.426273435  | 1.239481201 | 0.6490985 |
| <b>atpA</b> | gi 49175990 ref NC_000913.2 | - | 3916339 | 3917880 | 8692.021299 | 8688.873414 | 7755.729906 | 6509.64631  | 7884.51665  | 0.239197828  | 0.51358703  | 0.2206907 |
| <b>atpH</b> | gi 49175990 ref NC_000913.2 | - | 3917893 | 3918426 | 3186.523237 | 3191.363979 | 2878.637789 | 2322.228929 | 2947.724905 | 0.235974487  | 0.530824532 | 0.2277639 |
| <b>atpF</b> | gi 49175990 ref NC_000913.2 | - | 3918441 | 3918911 | 5716.907369 | 5620.023556 | 4872.680603 | 4191.045462 | 4688.80452  | 0.313714208  | 0.764146579 | 0.3470783 |
| <b>atpE</b> | gi 49175990 ref NC_000913.2 | - | 3918973 | 3919212 | 2685.799043 | 2962.506384 | 2706.518024 | 2470.08317  | 2910.720992 | 0.053238899  | 0.117857975 | 0.0336361 |
| <b>atpB</b> | gi 49175990 ref NC_000913.2 | - | 3919259 | 3920074 | 5553.643832 | 6225.117959 | 5043.012534 | 4647.371167 | 5706.003047 | 0.180606603  | 0.418693786 | 0.1712619 |
| <b>atpI</b> | gi 49175990 ref NC_000913.2 | - | 3920083 | 3920463 | 2524.875052 | 2800.091188 | 2061.048134 | 2046.342676 | 2767.949554 | 0.193532093  | 0.451280922 | 0.1869433 |
| <b>rsmG</b> | gi 49175990 ref NC_000913.2 | - | 3921080 | 3921703 | 367.9967462 | 426.528303  | 285.4752183 | 290.4274931 | 312.855968  | 0.399981303  | 1.293136016 | 0.6901153 |

|             |                             |   |         |         |             |             |             |             |             |              |             |           |
|-------------|-----------------------------|---|---------|---------|-------------|-------------|-------------|-------------|-------------|--------------|-------------|-----------|
| <b>mmnG</b> | gi 49175990 ref NC_000913.2 | - | 3921767 | 3923656 | 2218.829146 | 2063.902073 | 1812.513697 | 1523.664787 | 1274.682396 | 0.50277651   | 1.373997156 | 0.7445406 |
| <b>mioC</b> | gi 49175990 ref NC_000913.2 | - | 3924035 | 3924478 | 1247.845263 | 1339.264231 | 1030.749482 | 965.4095776 | 1026.353871 | 0.35218687   | 1.055853507 | 0.5279327 |
| <b>asnC</b> | gi 49175990 ref NC_000913.2 | - | 3924568 | 3925026 | 134.849099  | 142.4890644 | 102.9222721 | 133.269206  | 131.127216  | 0.161632578  | 0.352788551 | 0.1402157 |
| <b>asnA</b> | gi 49175990 ref NC_000913.2 | + | 3925178 | 3926170 | 373.9072362 | 332.3781172 | 339.4323039 | 254.6020724 | 206.852162  | 0.439716406  | 1.043087478 | 0.5210963 |
| <b>viaA</b> | gi 49175990 ref NC_000913.2 | - | 3926175 | 3927626 | 972.9348937 | 984.0061049 | 121.60151   | 1083.006637 | 894.3957155 | -0.118438366 | 0.238998819 | 0.0858143 |
| <b>ravA</b> | gi 49175990 ref NC_000913.2 | - | 3927620 | 3929116 | 1150.959381 | 1136.91462  | 1797.330308 | 1766.824855 | 1500.02182  | -0.554518615 | 1.822070748 | 1.0659315 |
| <b>kup</b>  | gi 49175990 ref NC_000913.2 | + | 3929339 | 3931207 | 616.3095159 | 643.9885809 | 681.2724671 | 590.927994  | 563.2945208 | 0.045062646  | 0.075606258 | 0.0183319 |
| <b>rbsD</b> | gi 49175990 ref NC_000913.2 | + | 3931374 | 3931793 | 497.1739263 | 414.9829919 | 804.962154  | 656.9094019 | 432.5358757 | -0.423354683 | 1.2283991   | 0.6417371 |
| <b>rbsA</b> | gi 49175990 ref NC_000913.2 | + | 3931801 | 3933306 | 631.9060204 | 696.2531997 | 966.323496  | 856.5355014 | 714.8956337 | -0.35189536  | 0.935612574 | 0.4547432 |
| <b>rbsC</b> | gi 49175990 ref NC_000913.2 | + | 3933311 | 3934276 | 1676.849867 | 1536.749733 | 2243.99628  | 1910.52168  | 1788.276614 | -0.279123727 | 0.689976969 | 0.3092004 |
| <b>rbsB</b> | gi 49175990 ref NC_000913.2 | + | 3934301 | 3935191 | 9518.166308 | 10857.35863 | 12247.59427 | 12882.06649 | 15392.10713 | -0.433367512 | 1.045317745 | 0.5211846 |
| <b>rbsK</b> | gi 49175990 ref NC_000913.2 | + | 3935317 | 3936246 | 754.6453465 | 755.0963991 | 933.8704978 | 984.1840178 | 807.9058115 | -0.265387044 | 0.661756291 | 0.2976012 |
| <b>rbsR</b> | gi 49175990 ref NC_000913.2 | + | 3936250 | 3937242 | 391.0099526 | 413.188814  | 425.8048461 | 442.7362923 | 387.1686821 | -0.064189952 | 0.097309011 | 0.0262976 |
| <b>hsrA</b> | gi 49175990 ref NC_000913.2 | - | 3937208 | 3938635 | 653.6097336 | 668.6738582 | 821.2340171 | 870.9872939 | 757.3426075 | -0.307223179 | 0.808364025 | 0.3721476 |
| <b>yieP</b> | gi 49175990 ref NC_000913.2 | - | 3938658 | 3939350 | 1088.651758 | 1026.714679 | 1469.158192 | 1866.294987 | 1419.241519 | -0.580748617 | 1.932615092 | 1.1491129 |
| <b>hdrR</b> | gi 49175990 ref NC_000913.2 | - | 3945151 | 3945990 | 413.6701712 | 444.5404046 | 350.1357572 | 406.569636  | 267.4239734 | 0.321764803  | 0.818244318 | 0.0768885 |
| <b>yifE</b> | gi 49175990 ref NC_000913.2 | + | 3946109 | 3946447 | 299.839249  | 2927.303761 | 1575.993335 | 1754.824935 | 2507.508008 | 0.59560849   | 1.919985868 | 1.1406601 |
| <b>yifB</b> | gi 49175990 ref NC_000913.2 | - | 3946472 | 3947992 | 251.1851715 | 245.0365895 | 180.2167765 | 222.0490689 | 281.0791977 | 0.111658883  | 0.219592628 | 0.0761009 |
| <b>ilvL</b> | gi 49175990 ref NC_000913.2 | + | 3948345 | 3948443 | 1199.116506 | 935.4459139 | 1224.374588 | 2395.621469 | 2818.165191 | -1.005824612 | 3.19886858  | 2.1724452 |
| <b>ilvX</b> | gi 49175990 ref NC_000913.2 | + | 3948530 | 3948590 | 77.57267956 | 77.88156375 | 33.86080532 | 20.40874819 | 26.93235056 | 1.532594523  | 7.332286304 | 5.7792767 |
| <b>ilvM</b> | gi 49175990 ref NC_000913.2 | + | 3950224 | 3950487 | 71.2230601  | 55.00636466 | 41.08971486 | 44.72183591 | 34.93594291 | 0.679640103  | 1.798320903 | 1.0521671 |
| <b>ilvE</b> | gi 49175990 ref NC_000913.2 | + | 3950507 | 3951436 | 351.0395399 | 326.6993764 | 322.7973841 | 286.9445405 | 220.2752669 | 0.314714646  | 0.695007185 | 0.3103556 |
| <b>ilvD</b> | gi 49175990 ref NC_000913.2 | + | 3951501 | 3953351 | 386.229232  | 376.1093541 | 380.5672343 | 301.5882346 | 219.2827646 | 0.366562091  | 0.816895222 | 0.3785126 |
| <b>ilvA</b> | gi 49175990 ref NC_000913.2 | + | 3953354 | 3954898 | 322.7596126 | 289.6413575 | 349.2025123 | 277.0506096 | 256.028276  | 0.086943338  | 0.101095715 | 0.0266333 |
| <b>ilvY</b> | gi 49175990 ref NC_000913.2 | - | 3954950 | 3955843 | 222.0927155 | 221.3003731 | 300.0431319 | 266.6968822 | 181.1369158 | -0.153685984 | 0.300329311 | 0.11561   |
| <b>ilvC</b> | gi 49175990 ref NC_000913.2 | + | 3955993 | 3957468 | 872.0028085 | 874.7738946 | 314.2115911 | 252.9658817 | 602.2469146 | 1.148740027  | 4.628556539 | 3.406032  |
| <b>ppiC</b> | gi 49175990 ref NC_000913.2 | - | 3957555 | 3957836 | 457.6102608 | 527.2066216 | 435.0808472 | 381.4247849 | 464.2155369 | 0.187506678  | 0.463157803 | 0.1939831 |
| <b>rep</b>  | gi 49175990 ref NC_000913.2 | + | 3958700 | 3960721 | 792.01927   | 759.8258211 | 581.8104836 | 485.6283943 | 508.2261302 | 0.577034583  | 2.056582627 | 1.2422391 |
| <b>gpp</b>  | gi 49175990 ref NC_000913.2 | - | 3960768 | 3962252 | 1916.231328 | 1966.118484 | 1740.856001 | 1811.750134 | 1814.942376 | 0.111849111  | 0.221940734 | 0.0773895 |
| <b>rhlB</b> | gi 49175990 ref NC_000913.2 | - | 3962388 | 3963653 | 3299.339433 | 3430.734787 | 3086.047199 | 3180.648259 | 3082.56079  | 0.104322291  | 0.217783287 | 0.075455  |
| <b>trxA</b> | gi 49175990 ref NC_000913.2 | + | 3963784 | 3964113 | 4014.471414 | 4712.090514 | 3433.861672 | 3483.475311 | 3856.356373 | 0.2541932    | 0.686438686 | 0.3077389 |
| <b>rho</b>  | gi 49175990 ref NC_000913.2 | + | 3964440 | 3965699 | 8199.277034 | 8042.042371 | 5574.277674 | 6319.880299 | 6902.917637 | 0.368338481  | 0.985099408 | 0.4817951 |
| <b>rfe</b>  | gi 49175990 ref NC_000913.2 | + | 3965939 | 3967042 | 1394.587151 | 1624.247578 | 1407.773629 | 1322.009495 | 1557.887783 | 0.055622439  | 0.142996827 | 0.0427363 |
| <b>wzzE</b> | gi 49175990 ref NC_000913.2 | + | 3967054 | 3968100 | 1298.006235 | 1273.684338 | 1249.756458 | 1192.995374 | 1279.836048 | 0.054681034  | 0.093498453 | 0.024853  |
| <b>rfE</b>  | gi 49175990 ref NC_000913.2 | + | 3968156 | 3969286 | 800.0121011 | 815.8933078 | 826.7050944 | 649.2909942 | 602.6661522 | 0.233678872  | 0.515969637 | 0.2211855 |
| <b>rfD</b>  | gi 49175990 ref NC_000913.2 | + | 3969283 | 3970545 | 819.0308547 | 813.9815484 | 850.8840367 | 657.2531035 | 720.2309679 | 0.148607627  | 0.283057883 | 0.1073228 |
| <b>rfG</b>  | gi 49175990 ref NC_000913.2 | + | 3970545 | 3971612 | 657.0972892 | 609.7404829 | 719.6889574 | 582.0849315 | 621.5182075 | 0.002584126  | 0.023362648 | 0.0005477 |
| <b>rfH</b>  | gi 49175990 ref NC_000913.2 | + | 3971631 | 3972512 | 461.6013564 | 413.1141751 | 533.3862265 | 441.7218855 | 339.2426891 | 0.029346462  | 0           | 0         |
| <b>rfC</b>  | gi 49175990 ref NC_000913.2 | + | 3972490 | 3973164 | 283.0547    | 249.7428447 | 301.7501639 | 257.9305825 | 236.9129339 | 0.03180836   | 0.006905663 | 0         |
| <b>rfA</b>  | gi 49175990 ref NC_000913.2 | + | 3973169 | 3974299 | 372.0961019 | 391.3408912 | 363.4415182 | 274.8057448 | 235.9556468 | 0.400773174  | 1.041796312 | 0.5210803 |
| <b>wzxE</b> | gi 49175990 ref NC_000913.2 | + | 3974301 | 3975551 | 688.9783259 | 698.1135564 | 582.4358443 | 507.7428791 | 339.3674579 | 0.556347858  | 1.720269471 | 0.9957163 |
| <b>rfT</b>  | gi 49175990 ref NC_000913.2 | + | 3975548 | 3976627 | 504.3925714 | 565.1864688 | 464.7832487 | 405.8434686 | 335.7533439 | 0.406946479  | 1.190235122 | 0.6164224 |
| <b>wzyE</b> | gi 49175990 ref NC_000913.2 | + | 3976624 | 3977976 | 383.0055727 | 380.8677705 | 420.6143116 | 348.6562434 | 262.9732794 | 0.167994667  | 0.28407087  | 0.1074461 |
| <b>rfM</b>  | gi 49175990 ref NC_000913.2 | + | 3977979 | 3978719 | 223.0074426 | 248.8935716 | 241.7367117 | 185.1573905 | 178.5872874 | 0.224820487  | 0.471939522 | 0.1985574 |
| <b>yifK</b> | gi 49175990 ref NC_000913.2 | + | 3978910 | 3980295 | 1152.216459 | 1139.764724 | 1057.737603 | 1116.666058 | 1169.864654 | 0.037527792  | 0.072635899 | 0.0174529 |
| <b>asiB</b> | gi 49175990 ref NC_000913.2 | + | 3980981 | 3982216 | 261.4692128 | 240.2621461 | 170.5124229 | 195.0977988 | 221.8477726 | 0.359579169  | 0.916570599 | 0.4427423 |
| <b>asiA</b> | gi 49175990 ref NC_000913.2 | - | 3982375 | 3984030 | 97.62195796 | 103.5466066 | 105.8260248 | 86.53619031 | 103.1285398 | 0.028341097  | 0.034903075 | 0.0036811 |
| <b>hemY</b> | gi 49175990 ref NC_000913.2 | - | 3984709 | 3985905 | 1663.655216 | 1500.649443 | 1663.036827 | 1638.900921 | 1188.384536 | 0.103368284  | 0.138487744 | 0.0415146 |
| <b>hemX</b> | gi 49175990 ref NC_000913.2 | - | 3985908 | 3987089 | 1413.802683 | 1266.042745 | 1496.654298 | 1300.447596 | 958.4859238 | 0.128960559  | 0.174036789 | 0.0547989 |
| <b>hemD</b> | gi 49175990 ref NC_000913.2 | - | 3987111 | 3987851 | 925.9185953 | 856.6896504 | 1194.388148 | 1113.115293 | 776.7823193 | -0.1824491   | 0.41364806  | 0.1691072 |
| <b>hemC</b> | gi 49175990 ref NC_000913.2 | - | 3987848 | 3988789 | 1741.560562 | 1728.649594 | 2085.054445 | 1933.9543   | 1709.771666 | -0.130001374 | 0.251593023 | 0.0917711 |
| <b>cyaA</b> | gi 49175990 ref NC_000913.2 | + | 3989176 | 3991722 | 4516.507762 | 4741.479718 | 4460.035202 | 4278.238482 | 3786.078044 | 0.147276415  | 0.298665524 | 0.1150997 |
| <b>cyaY</b> | gi 49175990 ref NC_000913.2 | - | 3991762 | 3992082 | 329.6243799 | 302.9488649 | 255.8912261 | 237.76926   | 247.9070559 | 0.369791945  | 0.967761786 | 0.4717454 |
| <b>yifL</b> | gi 49175990 ref NC_000913.2 | + | 3992545 | 3992748 | 895.0924113 | 967.8910614 | 1138.900404 | 1019.114408 | 878.6219663 | -0.121376065 | 0.223846434 | 0.077825  |
| <b>dapF</b> | gi 49175990 ref NC_000913.2 | + | 3992785 | 3993609 | 1236.209784 | 1198.643566 | 1682.228572 | 1396.924547 | 1056.077206 | -0.157606204 | 0.340212803 | 0.1335789 |
| <b>yigA</b> | gi 49175990 ref NC_000913.2 | + | 3993606 | 3994313 | 1399.901502 | 1260.34639  | 1774.513921 | 1359.951097 | 933.9658693 | 0.011031802  | 0.03556365  | 0.0036811 |
| <b>xerC</b> | gi 49175990 ref NC_000913.2 | + | 3994310 | 3995206 | 1107.715007 | 1005.80112  | 1246.757948 | 915.0164672 | 784.5434143 | 0.140274965  | 0.18886947  | 0.0611353 |

|      |                             |   |         |         |             |             |             |             |             |              |             |           |
|------|-----------------------------|---|---------|---------|-------------|-------------|-------------|-------------|-------------|--------------|-------------|-----------|
| yigB | gi 49175990 ref NC_000913.2 | + | 3995206 | 3995922 | 509.8046296 | 511.9462257 | 531.303972  | 472.0151367 | 415.3117794 | 0.120318414  | 0.219357667 | 0.0760663 |
| uvrD | gi 49175990 ref NC_000913.2 | + | 3996006 | 3998168 | 1782.530219 | 1792.293173 | 1643.195241 | 1454.191139 | 1376.553264 | 0.268416833  | 0.617508214 | 0.2745307 |
| yigE | gi 49175990 ref NC_000913.2 | - | 3998315 | 3999079 | 63.299279   | 98.93174483 | 69.09692821 | 65.14919064 | 77.26293928 | 0.146470552  | 0.358204007 | 0.1416893 |
| corA | gi 49175990 ref NC_000913.2 | + | 3999449 | 4000399 | 443.9188949 | 398.868891  | 463.7717766 | 422.6694447 | 374.8990307 | 0.025903879  | 0.00748473  | 0         |
| yigF | gi 49175990 ref NC_000913.2 | - | 4000442 | 4000822 | 29.43119221 | 33.26743653 | 30.92619803 | 32.61907462 | 43.50799347 | -0.205670475 | 0.26006276  | 0.0955969 |
| rarD | gi 49175990 ref NC_000913.2 | - | 4001311 | 4002201 | 137.795024  | 156.7660753 | 137.5394302 | 113.4140843 | 125.6413872 | 0.220441929  | 0.501510926 | 0.213609  |
| yigI | gi 49175990 ref NC_000913.2 | - | 4002253 | 4002720 | 57.02213121 | 67.48555541 | 31.2145466  | 54.51094845 | 34.93944606 | 0.596164209  | 1.559038173 | 0.8718492 |
| pldA | gi 49175990 ref NC_000913.2 | + | 4002885 | 4003754 | 705.3953157 | 859.6692654 | 608.3368703 | 701.7967076 | 749.1210469 | 0.152162848  | 0.42155667  | 0.1726141 |
| recQ | gi 49175990 ref NC_000913.2 | + | 4003887 | 4005716 | 974.9857738 | 942.1929304 | 801.8281753 | 831.9932704 | 971.1582307 | 0.141733713  | 0.293123191 | 0.1132795 |
| rhtC | gi 49175990 ref NC_000913.2 | + | 4005780 | 4006400 | 366.7382159 | 424.6281817 | 519.3526447 | 502.0875794 | 362.7777717 | -0.232578376 | 0.461690516 | 0.1936062 |
| rhtB | gi 49175990 ref NC_000913.2 | - | 4006462 | 4007082 | 165.8312142 | 137.6460581 | 157.9810712 | 161.4416874 | 161.5256009 | -0.055989074 | 0.126781101 | 0.0373086 |
| pldB | gi 49175990 ref NC_000913.2 | + | 4007193 | 4008215 | 1170.887157 | 1248.078945 | 1373.638372 | 1560.522125 | 1515.422585 | -0.309140951 | 0.7249102   | 0.3248854 |
| yigL | gi 49175990 ref NC_000913.2 | + | 4008223 | 4009023 | 570.6757406 | 525.2037911 | 591.4530857 | 604.1472912 | 496.0772549 | -0.02600341  | 0.066476377 | 0.0157502 |
| yigM | gi 49175990 ref NC_000913.2 | + | 4009099 | 4009998 | 167.8315514 | 207.1426155 | 212.9696784 | 173.94455   | 181.8093855 | -0.035031145 | 0.016385918 | 0         |
| metR | gi 49175990 ref NC_000913.2 | - | 4009886 | 4010839 | 96.40019653 | 100.6914729 | 90.00790818 | 83.01764076 | 83.06073165 | 0.205679784  | 0.419952601 | 0.171766  |
| metE | gi 49175990 ref NC_000913.2 | + | 4011076 | 4013337 | 389.2226503 | 328.5564895 | 485.7776938 | 477.234349  | 357.6186448 | -0.143273726 | 0.30697705  | 0.1187544 |
| ysgA | gi 49175990 ref NC_000913.2 | - | 4013377 | 4014192 | 417.9668916 | 384.6324382 | 516.8013862 | 544.5101649 | 237.1022045 | -0.196307507 | 0.426225335 | 0.1746266 |
| udp  | gi 49175990 ref NC_000913.2 | + | 4014454 | 4015215 | 7810.379074 | 8102.857724 | 17325.87557 | 15130.90658 | 11685.58261 | -0.878363486 | 3.412210596 | 2.3602507 |
| rnuC | gi 49175990 ref NC_000913.2 | + | 4015356 | 4016783 | 1106.676043 | 1129.331585 | 1414.330212 | 1450.717498 | 1388.764279 | -0.345904471 | 0.915194879 | 0.4423179 |
| ubiE | gi 49175990 ref NC_000913.2 | + | 4016878 | 4017633 | 2093.380306 | 1882.472094 | 2969.618387 | 2583.132162 | 2215.763573 | -0.354717561 | 0.967307833 | 0.4716707 |
| yigP | gi 49175990 ref NC_000913.2 | + | 4017647 | 4018252 | 1308.962663 | 1203.367529 | 1633.002655 | 1622.239712 | 1476.358573 | -0.313556313 | 0.847448592 | 0.3971622 |
| ubiB | gi 49175990 ref NC_000913.2 | + | 4018249 | 4019889 | 2339.626814 | 2404.932436 | 2862.819239 | 2470.118449 | 2895.074426 | -0.209820821 | 0.434948445 | 0.1776024 |
| tatA | gi 49175990 ref NC_000913.2 | + | 4019968 | 4020237 | 2497.257576 | 2655.699281 | 2848.760597 | 2595.747542 | 3470.251812 | -0.217896352 | 0.430156784 | 0.1762871 |
| tatB | gi 49175990 ref NC_000913.2 | + | 4020241 | 4020756 | 1650.80251  | 1589.962714 | 1620.957019 | 1412.84026  | 1588.313569 | 0.082215071  | 0.130893877 | 0.0292301 |
| tatC | gi 49175990 ref NC_000913.2 | + | 4020759 | 4021535 | 1545.288321 | 1547.239724 | 1421.079513 | 1366.818586 | 1568.007298 | 0.088993922  | 0.167997371 | 0.052933  |
| tatD | gi 49175990 ref NC_000913.2 | + | 4021577 | 4022359 | 564.4533336 | 506.1959508 | 532.7453167 | 440.8042363 | 473.4216815 | 0.17359976   | 0.316056265 | 0.1236733 |
| rfaH | gi 49175990 ref NC_000913.2 | - | 4022356 | 4022844 | 451.0235177 | 566.1891725 | 327.1000881 | 338.7920264 | 454.9530259 | 0.403592624  | 1.281299892 | 0.6812611 |
| ubiD | gi 49175990 ref NC_000913.2 | + | 4023011 | 4024504 | 2455.78429  | 2486.608961 | 3290.758806 | 2843.276158 | 2561.195837 | -0.221254351 | 0.482091056 | 0.2027933 |
| fre  | gi 49175990 ref NC_000913.2 | + | 4024550 | 4025251 | 697.2736485 | 687.6530209 | 931.6203555 | 831.7861156 | 614.0853456 | -0.179162556 | 0.403498642 | 0.1637518 |
| fadA | gi 49175990 ref NC_000913.2 | - | 4025632 | 4026795 | 98.91784214 | 103.541801  | 95.67612969 | 107.4836077 | 92.09955067 | 0.033442275  | 0.067123055 | 0.0160372 |
| fadB | gi 49175990 ref NC_000913.2 | - | 4026805 | 4028994 | 81.97986888 | 82.63200461 | 80.06309153 | 105.0983912 | 82.02546335 | -0.120884535 | 0.182301398 | 0.0582503 |
| pedP | gi 49175990 ref NC_000913.2 | + | 4029184 | 4030515 | 2960.089828 | 2885.511545 | 4330.463004 | 3682.915762 | 2790.26907  | -0.281577182 | 0.680443655 | 0.304768  |
| yigZ | gi 49175990 ref NC_000913.2 | + | 4030515 | 4031129 | 896.363172  | 805.3863591 | 1130.735395 | 1078.311012 | 721.850354  | -0.172069509 | 0.387350569 | 0.1543669 |
| trkH | gi 49175990 ref NC_000913.2 | + | 4031168 | 4032619 | 1313.76141  | 1296.482514 | 1229.887843 | 1282.495859 | 1170.085465 | 0.090541985  | 0.169341845 | 0.0533084 |
| hemG | gi 49175990 ref NC_000913.2 | + | 4032631 | 4033176 | 446.2083212 | 430.2440443 | 362.1876742 | 366.5850774 | 351.1649131 | 0.289344185  | 0.724999616 | 0.3248854 |
| mobB | gi 49175990 ref NC_000913.2 | - | 4038929 | 4039456 | 67.87983072 | 56.93057083 | 51.47738212 | 48.19819262 | 42.75967849 | 0.420045952  | 0.887903351 | 0.4234961 |
| mobA | gi 49175990 ref NC_000913.2 | - | 4039438 | 4040022 | 162.0628864 | 166.2230086 | 145.7829658 | 156.7544104 | 119.1863825 | 0.222988343  | 0.462431415 | 0.1939831 |
| yihD | gi 49175990 ref NC_000913.2 | + | 4040092 | 4040361 | 572.0470988 | 744.7726949 | 540.6968408 | 586.4657799 | 713.0623695 | 0.055613355  | 0.189533692 | 0.0611353 |
| rdoA | gi 49175990 ref NC_000913.2 | + | 4040438 | 4041424 | 1103.365434 | 1177.793511 | 832.9609762 | 1053.806872 | 1168.513148 | 0.140129945  | 0.335844504 | 0.1322937 |
| dsbA | gi 49175990 ref NC_000913.2 | + | 4041441 | 4042067 | 1620.975352 | 1638.426184 | 1086.725409 | 1013.713767 | 1220.218325 | 0.555175088  | 1.986006334 | 1.1883366 |
| yihF | gi 49175990 ref NC_000913.2 | + | 4042222 | 4043652 | 72.33969471 | 59.77438793 | 60.9943282  | 105.0924748 | 99.64263905 | -0.420782513 | 0.909724255 | 0.4390591 |
| yihG | gi 49175990 ref NC_000913.2 | - | 4043693 | 4044625 | 206.2395098 | 210.8632434 | 123.0424734 | 174.6468164 | 162.551195  | 0.426023293  | 1.204778746 | 0.6233323 |
| poiA | gi 49175990 ref NC_000913.2 | + | 4044989 | 4047775 | 1943.269745 | 1714.346515 | 2184.053656 | 1963.013657 | 1454.26994  | 0.001221834  | 0.039854176 | 0.0045376 |
| yihA | gi 49175990 ref NC_000913.2 | - | 4048156 | 4048788 | 1012.997209 | 937.4236111 | 1008.125085 | 932.8983816 | 982.6301384 | 0.014698411  | 0.004051239 | 0         |
| yihI | gi 49175990 ref NC_000913.2 | + | 4049370 | 4049879 | 331.6723911 | 353.3539727 | 314.864798  | 396.5299294 | 306.4459296 | -0.000339232 | 0.021999995 | 0.0004107 |
| hemN | gi 49175990 ref NC_000913.2 | + | 4050068 | 4051441 | 1205.628826 | 1061.825766 | 1029.634472 | 940.8663773 | 1154.023194 | 0.13960723   | 0.242544168 | 0.0877793 |
| ysbB | gi 49175990 ref NC_000913.2 | - | 4051670 | 4051780 | 1213.141705 | 1086.528623 | 1413.79962  | 1232.276435 | 1162.119042 | -0.162119042 | 0.386490078 | 0.1542461 |
| glnG | gi 49175990 ref NC_000913.2 | - | 4051892 | 4053301 | 555.9299992 | 548.0305779 | 637.3125057 | 514.781647  | 520.63918   | -0.001575401 | 0.018711446 | 0         |
| glnL | gi 49175990 ref NC_000913.2 | - | 4053313 | 4054362 | 489.0141868 | 486.2968454 | 537.2191792 | 566.0169488 | 473.596301  | -0.105585328 | 0.202612065 | 0.0676994 |
| glnA | gi 49175990 ref NC_000913.2 | - | 4054648 | 4056057 | 5741.944813 | 5974.331014 | 3967.139063 | 3749.31577  | 4594.346206 | 0.505220595  | 1.642758769 | 0.9353911 |
| typA | gi 49175990 ref NC_000913.2 | + | 4056430 | 4058253 | 4686.596727 | 4461.237698 | 3481.332184 | 3281.726224 | 3652.253121 | 0.405109894  | 1.152235059 | 0.5899848 |
| yihL | gi 49175990 ref NC_000913.2 | + | 4058470 | 4059180 | 64.15480864 | 69.35701111 | 92.18857444 | 130.790103  | 97.74836521 | -0.696764933 | 2.114228606 | 1.2875029 |
| yihM | gi 49175990 ref NC_000913.2 | + | 4059188 | 4060168 | 92.37632588 | 82.59077183 | 94.25553196 | 179.8680862 | 127.9738607 | -0.621737493 | 1.601101801 | 0.8991359 |
| yihN | gi 49175990 ref NC_000913.2 | + | 4060153 | 4061535 | 53.04310851 | 51.27561299 | 78.68206097 | 75.32900033 | 105.0922159 | -0.727803561 | 2.23919608  | 1.3798801 |
| ompL | gi 49175990 ref NC_000913.2 | - | 4061626 | 4062318 | 6.415598392 | 4.725057913 | 5.264229577 | 5.571758257 | 3.438691693 | 0.26103482   | 0.078095217 | 0.0192386 |
| yihO | gi 49175990 ref NC_000913.2 | - | 4062386 | 4063789 | 36.7662312  | 46.60024526 | 34.75858475 | 30.49271399 | 47.92364304 | 0.113622552  | 0.208213614 | 0.0704704 |
| yihP | gi 49175990 ref NC_000913.2 | - | 4063832 | 4065217 | 38.92497219 | 59.00497097 | 27.63462847 | 50.26130371 | 51.37540213 | 0.115100652  | 0.254892873 | 0.0928474 |

|      |                             |   |         |         |             |             |             |             |             |              |             |           |
|------|-----------------------------|---|---------|---------|-------------|-------------|-------------|-------------|-------------|--------------|-------------|-----------|
| yihQ | gi 49175990 ref NC_000913.2 | - | 4065263 | 4067299 | 29.68996711 | 28.48076618 | 26.70871552 | 26.96472763 | 31.3146295  | 0.040701441  | 0.017820252 | 0         |
| yihR | gi 49175990 ref NC_000913.2 | - | 4067498 | 4068424 | 14.29889687 | 17.11955918 | 19.05290043 | 23.56834975 | 28.98382615 | -0.626055125 | 0.939650047 | 0.4570396 |
| yihS | gi 49175990 ref NC_000913.2 | - | 4068538 | 4069779 | 80.02815556 | 82.64027294 | 85.96219342 | 78.52326244 | 76.36330187 | 0.020083524  | 0.023083322 | 0.0005477 |
| yihT | gi 49175990 ref NC_000913.2 | - | 4069796 | 4070674 | 18.80306874 | 32.40387559 | 18.31997213 | 15.71020823 | 13.56292623 | 0.64124694   | 1.231853047 | 0.644367  |
| yihU | gi 49175990 ref NC_000913.2 | - | 4070698 | 4071594 | 20.84719547 | 20.84719547 | 30.39913059 | 32.39841561 | 23.73467691 | -0.489004424 | 0.847072665 | 0.3971622 |
| yihV | gi 49175990 ref NC_000913.2 | + | 4071762 | 4072658 | 32.96432631 | 29.41395193 | 52.77112966 | 55.85839262 | 36.21137669 | -0.610194364 | 1.481800098 | 0.8119038 |
| yihW | gi 49175990 ref NC_000913.2 | + | 4072692 | 4073477 | 362.7017368 | 373.2846566 | 331.5217397 | 290.5818494 | 340.8849179 | 0.19567306   | 0.44051604  | 0.1808157 |
| yihX | gi 49175990 ref NC_000913.2 | + | 4073576 | 4074175 | 922.196668  | 837.68492   | 1752.897943 | 1625.479289 | 1131.263047 | -0.745989385 | 2.864170278 | 1.9045634 |
| yihY | gi 49175990 ref NC_000913.2 | + | 4074169 | 4075041 | 818.2132649 | 858.6483508 | 1497.582127 | 1527.962541 | 1251.020143 | -0.768594747 | 3.211558489 | 2.1802833 |
| dtD  | gi 49175990 ref NC_000913.2 | + | 4075038 | 4075475 | 802.2472766 | 740.8119288 | 1450.252221 | 1279.119676 | 924.8466923 | -0.632692432 | 2.230598737 | 1.3780804 |
| yiiD | gi 49175990 ref NC_000913.2 | + | 4075472 | 4076461 | 829.2887423 | 786.4151299 | 1043.120933 | 923.7586313 | 717.2319713 | -0.12697552  | 0.285597288 | 0.1086502 |
| yiiF | gi 49175990 ref NC_000913.2 | + | 4077774 | 4077992 | 51.54237632 | 40.7745258  | 42.76646757 | 50.36372045 | 47.11434241 | 0.003348197  | 0.006742582 | 0         |
| fdhE | gi 49175990 ref NC_000913.2 | - | 4078322 | 4079251 | 1474.486535 | 1532.060513 | 1768.247312 | 1676.135577 | 1616.525041 | -0.168058734 | 0.33140595  | 0.1302177 |
| fdol | gi 49175990 ref NC_000913.2 | - | 4079248 | 4079883 | 2493.848803 | 2384.001609 | 3142.978953 | 3063.015373 | 3139.725316 | -0.345883234 | 0.950477232 | 0.4631063 |
| fdoH | gi 49175990 ref NC_000913.2 | - | 4079880 | 4080782 | 2306.506875 | 1815.923725 | 2618.66856  | 2544.961855 | 2324.401885 | -0.238383662 | 0.608990977 | 0.2691543 |
| fdoG | gi 49175990 ref NC_000913.2 | - | 4080795 | 4083845 | 8597.533479 | 8214.895421 | 10940.75539 | 10138.43389 | 8292.220257 | -0.204119922 | 0.448948437 | 0.185387  |
| fdhD | gi 49175990 ref NC_000913.2 | + | 4084039 | 4084872 | 384.8902497 | 383.7183458 | 501.1792208 | 455.2766004 | 463.3317385 | -0.295321841 | 0.763461062 | 0.3467545 |
| yiiG | gi 49175990 ref NC_000913.2 | + | 4085025 | 4086080 | 28.35669622 | 28.49092577 | 20.88033633 | 35.80298082 | 42.33022138 | -0.235856527 | 0.249796251 | 0.091054  |
| frvR | gi 49175990 ref NC_000913.2 | - | 4086130 | 4087878 | 68.78888943 | 88.41437282 | 77.47727247 | 75.35220019 | 110.6250403 | -0.197810419 | 0.246948049 | 0.0903249 |
| frvX | gi 49175990 ref NC_000913.2 | - | 4088948 | 4088948 | 66.61046459 | 55.98172188 | 64.18726392 | 79.47486385 | 75.12209917 | -0.23729029  | 0.462412234 | 0.1939831 |
| frvB | gi 49175990 ref NC_000913.2 | - | 4088938 | 4090389 | 39.05243119 | 39.8931852  | 52.05954139 | 59.3634876  | 58.29912852 | -0.524431689 | 1.25335601  | 0.6600571 |
| frvA | gi 49175990 ref NC_000913.2 | - | 4090400 | 4090846 | 7.617072802 | 6.632957969 | 3.250015534 | 7.909659139 | 15.38198219 | -0.327730839 | 0.172118745 | 0.0541629 |
| rhaM | gi 49175990 ref NC_000913.2 | - | 4091147 | 4091461 | 32.09199956 | 33.24730686 | 44.80468436 | 75.91909942 | 65.00366724 | -0.940595321 | 2.700323403 | 1.7716502 |
| rhaD | gi 49175990 ref NC_000913.2 | - | 4091471 | 4092295 | 20.91048869 | 18.97480458 | 24.34636463 | 36.75176568 | 27.01350259 | -0.554708976 | 0.959926011 | 0.4669512 |
| rhaA | gi 49175990 ref NC_000913.2 | - | 4092746 | 4094005 | 21.58249433 | 18.96909619 | 20.91521101 | 11.45808858 | 21.18086011 | 0.205965699  | 0.180449191 | 0.0573901 |
| rhaB | gi 49175990 ref NC_000913.2 | - | 4094002 | 4095471 | 20.78532807 | 20.89229264 | 22.70729046 | 32.20805917 | 17.07649411 | -0.204517788 | 0.239871945 | 0.0861717 |
| rhaS | gi 49175990 ref NC_000913.2 | + | 4095759 | 4096595 | 34.69915263 | 34.18519726 | 31.65027971 | 26.99221587 | 29.17686192 | 0.241581112  | 0.334898751 | 0.1322052 |
| rhaR | gi 49175990 ref NC_000913.2 | + | 4096669 | 4097517 | 45.54983595 | 78.05179088 | 64.16954046 | 72.05840921 | 70.71952772 | -0.301558202 | 0.380347886 | 0.1502827 |
| rhaT | gi 49175990 ref NC_000913.2 | - | 4097514 | 4098548 | 50.07765416 | 59.88779962 | 59.37970402 | 61.48584862 | 41.81050356 | 0.005805426  | 0.012012346 | 0         |
| sodA | gi 49175990 ref NC_000913.2 | + | 4098833 | 4099453 | 4442.147626 | 4536.306876 | 2085.248773 | 2425.083025 | 2884.701922 | 0.849896228  | 3.938952481 | 2.7970192 |
| kdgT | gi 49175990 ref NC_000913.2 | + | 4099713 | 4100696 | 62.19326425 | 69.36696251 | 98.68274401 | 87.36591935 | 62.08167119 | -0.3297617   | 0.647436241 | 0.2895228 |
| yiiM | gi 49175990 ref NC_000913.2 | + | 4100845 | 4101519 | 457.2062902 | 457.2062902 | 621.945807  | 536.8270897 | 312.5873905 | -0.146987077 | 0.320815393 | 0.1253096 |
| cpxA | gi 49175990 ref NC_000913.2 | - | 4101625 | 4102998 | 1376.930193 | 1332.566083 | 1328.970373 | 1264.620065 | 1134.280679 | 0.134715677  | 0.248521264 | 0.0906571 |
| cpxR | gi 49175990 ref NC_000913.2 | - | 4102995 | 4103693 | 884.4686298 | 927.984594  | 942.643613  | 829.7072369 | 774.202667  | 0.096036377  | 0.181344961 | 0.0580027 |
| cpxP | gi 49175990 ref NC_000913.2 | + | 4103843 | 4104343 | 6965.07524  | 6759.971411 | 4194.198001 | 7875.223817 | 5624.49342  | 0.200364046  | 0.409241283 | 0.1668691 |
| fieF | gi 49175990 ref NC_000913.2 | + | 4104492 | 4105394 | 1042.417675 | 1032.436601 | 1167.414759 | 1176.025181 | 1087.082665 | -0.137419593 | 0.283348454 | 0.1073228 |
| pfkA | gi 49175990 ref NC_000913.2 | + | 4105575 | 4106537 | 5918.955314 | 5616.20718  | 10214.77504 | 9036.377061 | 7228.878139 | -0.5939635   | 1.898303412 | 1.1234451 |
| sbp  | gi 49175990 ref NC_000913.2 | + | 4106857 | 4107846 | 159.3765162 | 172.8945345 | 219.88141   | 215.1731974 | 180.8400578 | -0.310578901 | 0.701885802 | 0.3141674 |
| cdh  | gi 49175990 ref NC_000913.2 | + | 4107953 | 4108708 | 194.4022941 | 188.9966551 | 178.173512  | 189.5063174 | 207.3690128 | -0.0009184   | 0           | 0         |
| tpiA | gi 49175990 ref NC_000913.2 | - | 4108763 | 4109530 | 5606.842403 | 5946.795883 | 7573.43945  | 6292.011009 | 6211.219184 | -0.210421471 | 0.433583001 | 0.1772001 |
| yiiQ | gi 49175990 ref NC_000913.2 | - | 4109638 | 4110237 | 195.7911151 | 225.1603116 | 171.5673567 | 196.1018346 | 189.5438894 | 0.156235508  | 0.355298419 | 0.1411458 |
| yiiR | gi 49175990 ref NC_000913.2 | + | 4110338 | 4110778 | 82.63026972 | 82.62928815 | 66.60005375 | 46.10818499 | 41.7525756  | 0.699880171  | 2.002186347 | 1.2018135 |
| yiiS | gi 49175990 ref NC_000913.2 | + | 4110990 | 4111289 | 383.9213093 | 424.6073141 | 535.0969238 | 689.058702  | 498.3464663 | -0.5252069   | 1.576206367 | 0.8620699 |
| uspD | gi 49175990 ref NC_000913.2 | + | 4111316 | 4111744 | 738.1294929 | 762.7099716 | 833.4405165 | 988.5344177 | 777.6006668 | -0.21507619  | 0.46554501  | 0.1952808 |
| fpr  | gi 49175990 ref NC_000913.2 | - | 4111749 | 4112495 | 802.311807  | 873.8629858 | 895.2034314 | 798.3887903 | 842.4400072 | -0.020035202 | 0.016100983 | 0         |
| glpX | gi 49175990 ref NC_000913.2 | - | 4112592 | 4113602 | 1627.587604 | 1510.160853 | 2857.112235 | 2413.984316 | 2478.015017 | -0.700274779 | 2.63258838  | 1.7137555 |
| glpK | gi 49175990 ref NC_000913.2 | - | 4113737 | 4115245 | 17611.58248 | 15983.38077 | 30447.60437 | 28833.47325 | 22865.8166  | -0.682202802 | 2.355182681 | 1.4848406 |
| glpF | gi 49175990 ref NC_000913.2 | - | 4115268 | 4116113 | 4844.593542 | 5136.606277 | 9106.436867 | 8835.739658 | 8466.948506 | -0.824577828 | 3.256795799 | 2.219753  |
| zapB | gi 49175990 ref NC_000913.2 | + | 4116538 | 4116783 | 4923.165911 | 5691.338984 | 4766.64538  | 5554.228979 | 6855.569128 | -0.143563749 | 0.183705784 | 0.0590752 |
| rraA | gi 49175990 ref NC_000913.2 | - | 4116868 | 4117353 | 2510.633508 | 2576.846747 | 5261.982707 | 4530.520455 | 3606.821961 | -0.801949053 | 3.1660274   | 2.1524871 |
| menA | gi 49175990 ref NC_000913.2 | - | 4117446 | 4118372 | 224.8560387 | 254.598789  | 251.9686979 | 242.5071924 | 243.446265  | -0.051378852 | 0.05536871  | 0.0102387 |
| hsiU | gi 49175990 ref NC_000913.2 | - | 4118439 | 4119770 | 1277.142097 | 1267.991043 | 912.8989151 | 850.0206399 | 1014.957338 | 0.458692825  | 1.483828775 | 0.8129341 |
| hsiV | gi 49175990 ref NC_000913.2 | - | 4119780 | 4120310 | 681.0780921 | 631.5857944 | 561.1072992 | 513.6367771 | 574.2381709 | 0.26813826   | 0.627286176 | 0.2807711 |
| ftsN | gi 49175990 ref NC_000913.2 | - | 4120403 | 4121362 | 902.5445455 | 841.4962519 | 862.5130831 | 848.7942273 | 926.4395578 | -0.003371088 | 0.01492107  | 0         |
| cytR | gi 49175990 ref NC_000913.2 | - | 4121454 | 4122479 | 896.1437062 | 857.6552123 | 1137.138327 | 1082.061976 | 1253.915535 | -0.395812485 | 1.155938746 | 0.5921291 |
| priA | gi 49175990 ref NC_000913.2 | - | 4122635 | 4124833 | 505.3272664 | 516.7035769 | 490.8178804 | 454.2016123 | 503.573926  | 0.079963575  | 0.156612004 | 0.0487535 |
| rpmE | gi 49175990 ref NC_000913.2 | + | 4125036 | 4125248 | 12910.48494 | 14505.57806 | 6866.176499 | 9084.754414 | 12674.79147 | 0.483920657  | 1.385900318 | 0.751877  |



|      |                             |   |         |         |             |             |             |             |             |              |             |            |
|------|-----------------------------|---|---------|---------|-------------|-------------|-------------|-------------|-------------|--------------|-------------|------------|
| yiiX | gi 49175990 ref NC_000913.2 | - | 4125309 | 4125917 | 188.821729  | 177.5855202 | 165.5609018 | 230.7353964 | 224.1902087 | -0.180970321 | 0.31814902  | 0.1240423  |
| metJ | gi 49175990 ref NC_000913.2 | - | 4126101 | 4126418 | 596.3470708 | 582.2193288 | 578.8395239 | 541.7859374 | 728.7201113 | -0.066163001 | 0.10685764  | 0.0284507  |
| metB | gi 49175990 ref NC_000913.2 | + | 4126695 | 4127855 | 350.7044916 | 361.8880547 | 372.8079539 | 252.5990129 | 281.7052777 | 0.249753573  | 0.514795936 | 0.2209121  |
| metL | gi 49175990 ref NC_000913.2 | + | 4127858 | 4130290 | 676.4377346 | 669.6083451 | 800.8164363 | 651.6427761 | 751.5197322 | -0.117982719 | 0.246477545 | 0.02901954 |
| metF | gi 49175990 ref NC_000913.2 | + | 4130639 | 4131529 | 110.2048212 | 110.2048212 | 105.7017701 | 124.5309887 | 158.8781213 | -0.31705887  | 0.609674285 | 0.2692728  |
| katG | gi 49175990 ref NC_000913.2 | + | 4131858 | 4134038 | 9582.614801 | 8937.690492 | 21435.05815 | 14841.90993 | 12246.52951 | -0.768838722 | 2.634431155 | 1.7147128  |
| yjiE | gi 49175990 ref NC_000913.2 | + | 4134131 | 4135036 | 299.4317033 | 266.8433131 | 388.0062124 | 301.8487113 | 341.0324138 | -0.253835274 | 0.655234539 | 0.2935851  |
| yjiF | gi 49175990 ref NC_000913.2 | - | 4135063 | 4135680 | 64.03236854 | 55.0390954  | 74.10631867 | 48.65219154 | 88.22727275 | -0.218548914 | 0.386282786 | 0.1542208  |
| gldA | gi 49175990 ref NC_000913.2 | - | 4135955 | 4137058 | 690.8853829 | 697.1618181 | 1652.967907 | 1397.980373 | 975.3932115 | -0.934621314 | 3.927746461 | 2.7909818  |
| fsaB | gi 49175990 ref NC_000913.2 | - | 4137069 | 4137731 | 106.6631825 | 104.4673789 | 301.132682  | 236.6130574 | 187.7737451 | -1.174342398 | 5.397989481 | 4.0869281  |
| ptsA | gi 49175990 ref NC_000913.2 | - | 4137743 | 4140244 | 127.628346  | 93.9177304  | 184.411397  | 194.9649481 | 170.6467446 | -0.687826994 | 2.477863035 | 1.5846159  |
| frwC | gi 49175990 ref NC_000913.2 | + | 4140553 | 4141632 | 18.28300676 | 18.0396905  | 31.65026559 | 29.16196996 | 27.00630521 | -0.677646124 | 1.402262109 | 0.7611946  |
| frwB | gi 49175990 ref NC_000913.2 | + | 4141647 | 4141967 | 15.03982314 | 16.15301711 | 26.48317734 | 33.35599466 | 17.12045479 | -0.717330191 | 1.277109151 | 0.6787999  |
| pfID | gi 49175990 ref NC_000913.2 | + | 4142018 | 4144315 | 112.2926131 | 112.0727555 | 115.1402418 | 163.4785136 | 160.2409184 | -0.397018083 | 0.94603539  | 0.460299   |
| pfIC | gi 49175990 ref NC_000913.2 | + | 4144281 | 4145159 | 28.28354677 | 18.91758129 | 20.24305385 | 21.39161573 | 28.9688468  | 0.036936951  | 0           | 0          |
| frwD | gi 49175990 ref NC_000913.2 | + | 4145161 | 4145502 | 15.92343344 | 13.26737082 | 32.45519572 | 19.26645973 | 23.6156536  | -0.744107192 | 1.425832576 | 0.7750308  |
| yjiO | gi 49175990 ref NC_000913.2 | - | 4145489 | 4146340 | 120.5994299 | 115.8576915 | 133.1444582 | 109.919767  | 94.50517264 | 0.089262166  | 0.112942986 | 0.0316882  |
| yjiP | gi 49175990 ref NC_000913.2 | - | 4146555 | 4148288 | 479.2993236 | 513.875939  | 406.0617242 | 401.4251941 | 422.8364473 | 0.265570313  | 0.707117818 | 0.3173115  |
| ppc  | gi 49175990 ref NC_000913.2 | - | 4148470 | 4151121 | 3407.568139 | 3232.179667 | 4598.571802 | 4161.524669 | 2874.470728 | -0.202092619 | 0.444842763 | 0.1830384  |
| argE | gi 49175990 ref NC_000913.2 | - | 4151719 | 4152870 | 477.2440357 | 444.4755493 | 402.8507773 | 388.9424038 | 321.1065294 | 0.3293821    | 0.822500655 | 0.380789   |
| argC | gi 49175990 ref NC_000913.2 | + | 4153024 | 4154028 | 110.0584058 | 76.80886413 | 65.0798209  | 62.85921764 | 69.47481929 | 0.548287509  | 1.332952463 | 0.7180515  |
| argB | gi 49175990 ref NC_000913.2 | + | 4154036 | 4154812 | 125.5208967 | 126.3231045 | 87.28473864 | 86.24335601 | 70.87974404 | 0.631906644  | 2.161923748 | 1.3257958  |
| argH | gi 49175990 ref NC_000913.2 | + | 4154873 | 4156246 | 371.0373104 | 366.6177532 | 296.9887419 | 279.2204919 | 280.4802222 | 0.373791016  | 1.054586822 | 0.5270987  |
| oxyR | gi 49175990 ref NC_000913.2 | + | 4156513 | 4157430 | 1525.832731 | 1482.638217 | 1951.973819 | 1726.521402 | 1390.236071 | -0.151410614 | 0.316997496 | 0.1239013  |
| sthA | gi 49175990 ref NC_000913.2 | - | 4157413 | 4158813 | 1615.747815 | 1719.184944 | 2199.561582 | 2279.14467  | 1943.065175 | -0.367132354 | 0.900068147 | 0.4325823  |
| fabR | gi 49175990 ref NC_000913.2 | + | 4159147 | 4159794 | 1601.218798 | 1711.588675 | 2174.910879 | 2198.693211 | 2581.971929 | -0.499507546 | 1.396913623 | 0.7596047  |
| yjiD | gi 49175990 ref NC_000913.2 | + | 4159794 | 4160153 | 1842.869963 | 1982.288158 | 2317.618232 | 2171.74494  | 2254.688639 | -0.241220087 | 0.502031706 | 0.2138914  |
| trmA | gi 49175990 ref NC_000913.2 | + | 4160193 | 4161293 | 1086.675596 | 1049.521328 | 1191.664592 | 1238.877009 | 1289.911484 | -0.21345886  | 0.492381721 | 0.2085983  |
| btuB | gi 49175990 ref NC_000913.2 | + | 4161662 | 4163506 | 701.1943708 | 664.8393423 | 782.5126658 | 750.0491731 | 711.2988975 | -0.119895135 | 0.263855339 | 0.0969652  |
| murI | gi 49175990 ref NC_000913.2 | + | 4163451 | 4164308 | 599.8677498 | 633.5456164 | 673.3585884 | 584.2147969 | 568.8733684 | 0.019006918  | 0.032749953 | 0.0030156  |
| murB | gi 49175990 ref NC_000913.2 | + | 4170080 | 4171108 | 557.985228  | 524.2633821 | 557.1838176 | 613.0232956 | 482.624098  | -0.016296856 | 0.037000157 | 0.0039338  |
| birA | gi 49175990 ref NC_000913.2 | + | 4171105 | 4172070 | 404.6160566 | 383.6959857 | 321.558298  | 407.7520308 | 322.1182576 | 0.170703207  | 0.352711157 | 0.1402157  |
| coaA | gi 49175990 ref NC_000913.2 | - | 4172099 | 4173049 | 751.4286896 | 765.5527735 | 507.8523475 | 623.3415735 | 717.545046  | 0.28367366   | 0.764958595 | 0.3473328  |
| tufB | gi 49175990 ref NC_000913.2 | + | 4173967 | 4175151 | 39940.03507 | 38090.27286 | 31953.7877  | 27766.45768 | 30881.29503 | 0.380911985  | 0.955687172 | 0.4660176  |
| secE | gi 49175990 ref NC_000913.2 | + | 4175381 | 4175764 | 2921.643681 | 2812.369983 | 2610.750329 | 2278.38183  | 2623.633735 | 0.204003866  | 0.414254994 | 0.1691717  |
| nusG | gi 49175990 ref NC_000913.2 | + | 4175766 | 4176311 | 3627.916272 | 3964.55334  | 2820.752745 | 2370.503085 | 3424.200331 | 0.388374435  | 1.109872779 | 0.5636669  |
| rplK | gi 49175990 ref NC_000913.2 | + | 4176470 | 4176898 | 7580.312662 | 7335.375899 | 4272.451004 | 3950.100826 | 5410.793242 | 0.714779477  | 2.692289787 | 1.7646356  |
| rplA | gi 49175990 ref NC_000913.2 | + | 4176902 | 4177606 | 16196.88639 | 14658.39206 | 8692.853161 | 7842.683998 | 10107.62203 | 0.809504139  | 3.232137869 | 2.1985648  |
| rplJ | gi 49175990 ref NC_000913.2 | + | 4178019 | 4178516 | 9537.863321 | 10466.01698 | 5709.422179 | 5601.473537 | 7321.134717 | 0.667654757  | 2.450933585 | 1.5620049  |
| rplL | gi 49175990 ref NC_000913.2 | + | 4178583 | 4178948 | 15736.84299 | 14411.44668 | 8406.193546 | 7231.725463 | 9767.698906 | 0.844069162  | 3.433481792 | 2.3750174  |
| rpoB | gi 49175990 ref NC_000913.2 | + | 4179268 | 4183296 | 12387.41399 | 11567.71975 | 13093.15137 | 9221.70029  | 9150.289815 | 0.221027659  | 0.373083202 | 0.146713   |
| rpoC | gi 49175990 ref NC_000913.2 | + | 4183373 | 4187596 | 20003.59569 | 18737.85002 | 15208.2815  | 11543.52052 | 11301.7339  | 0.635940917  | 1.991892365 | 1.193553   |
| yjaZ | gi 49175990 ref NC_000913.2 | + | 4187809 | 4188348 | 174.8755822 | 208.0772351 | 150.025031  | 229.6421967 | 245.3106384 | -0.164930693 | 0.18822256  | 0.0610389  |
| thiH | gi 49175990 ref NC_000913.2 | - | 4188758 | 4189891 | 55.12218319 | 65.58702153 | 55.36029199 | 38.41443411 | 55.93293321 | 0.260853159  | 0.494631177 | 0.2099578  |
| thiG | gi 49175990 ref NC_000913.2 | - | 4189888 | 4190658 | 36.84869973 | 44.6880633  | 25.4265901  | 23.68494086 | 33.44933737 | 0.541034827  | 1.192556806 | 0.6167758  |
| thiS | gi 49175990 ref NC_000913.2 | - | 4190660 | 4190860 | 19.02217606 | 17.07448338 | 22.19350899 | 13.65040703 | 20.13824464 | -0.025515535 | 0.014836771 | 0          |
| thiF | gi 49175990 ref NC_000913.2 | - | 4190844 | 4191599 | 33.3222973  | 35.15152442 | 32.83250567 | 31.31725983 | 22.648617   | 0.245247889  | 0.357669351 | 0.1415056  |
| thiE | gi 49175990 ref NC_000913.2 | - | 4191592 | 4192227 | 36.5105732  | 25.56301528 | 26.51690026 | 27.96890934 | 23.65007754 | 0.290921574  | 0.3524073   | 0.1400853  |
| thiC | gi 49175990 ref NC_000913.2 | - | 4192227 | 4194122 | 169.1116058 | 167.1579031 | 152.0556592 | 127.9398271 | 131.328375  | 0.303570229  | 0.67910673  | 0.3039626  |
| rsd  | gi 49175990 ref NC_000913.2 | - | 4194355 | 4194831 | 384.1690973 | 478.8019459 | 382.1431708 | 393.4755463 | 374.7180422 | 0.139180624  | 0.358574929 | 0.1418846  |
| nudC | gi 49175990 ref NC_000913.2 | + | 4194926 | 4195699 | 589.3341382 | 488.114184  | 563.3494889 | 588.3021182 | 399.8254634 | 0.091869857  | 0.1002903   | 0.0264593  |
| hemE | gi 49175990 ref NC_000913.2 | + | 4195739 | 4196803 | 1066.537082 | 1014.371091 | 1134.992939 | 1022.485896 | 899.9023372 | 0.045826334  | 0.052369258 | 0.0090435  |
| nfi  | gi 49175990 ref NC_000913.2 | + | 4196813 | 4197484 | 584.7474175 | 509.0320086 | 524.8531602 | 483.2084116 | 432.0923391 | 0.214488939  | 0.416989414 | 0.1708749  |
| yjaG | gi 49175990 ref NC_000913.2 | + | 4197527 | 4198117 | 529.7946247 | 565.1636376 | 483.3069233 | 480.0047156 | 579.6615438 | 0.076548217  | 0.169653328 | 0.0533084  |
| hupA | gi 49175990 ref NC_000913.2 | + | 4198304 | 4198576 | 11149.35788 | 10499.18559 | 10232.39653 | 10946.97214 | 13267.50361 | -0.084913894 | 0.138640752 | 0.0415146  |
| yjaH | gi 49175990 ref NC_000913.2 | + | 4198589 | 4199284 | 554.8630165 | 623.1263346 | 629.3303745 | 584.4301777 | 823.9917224 | -0.22758235  | 0.430797483 | 0.1762871  |
| zraP | gi 49175990 ref NC_000913.2 | - | 4199286 | 4199711 | 53.58253954 | 54.13794087 | 66.48053203 | 67.30504761 | 71.7305721  | -0.348664057 | 0.734354989 | 0.3293741  |

|             |                             |   |         |         |             |             |             |             |             |              |             |           |
|-------------|-----------------------------|---|---------|---------|-------------|-------------|-------------|-------------|-------------|--------------|-------------|-----------|
| <b>zraS</b> | gi 49175990 ref NC_000913.2 | + | 4199949 | 4201346 | 190.5747806 | 151.8759766 | 472.2980984 | 364.4890308 | 315.5871186 | -1.11836238  | 5.541444344 | 4.2102835 |
| <b>zraR</b> | gi 49175990 ref NC_000913.2 | + | 4201343 | 4202668 | 188.4687574 | 161.4016868 | 324.8335752 | 251.1746327 | 188.9640075 | -0.502840174 | 1.457940503 | 0.7974161 |
| <b>purD</b> | gi 49175990 ref NC_000913.2 | - | 4202665 | 4203954 | 186.1607272 | 183.303057  | 702.5862553 | 751.3601634 | 152.7052012 | -1.509581138 | 3.859045884 | 2.742285  |
| <b>purH</b> | gi 49175990 ref NC_000913.2 | - | 4203966 | 4205555 | 440.0879597 | 400.7744622 | 1143.254439 | 1182.06687  | 367.9622661 | -1.06035786  | 3.02435699  | 2.0321357 |
| <b>yjaA</b> | gi 49175990 ref NC_000913.2 | + | 4211257 | 4211640 | 103.2137967 | 113.0571365 | 64.3889566  | 77.37348204 | 90.60180111 | 0.45879167   | 1.356439351 | 0.735296  |
| <b>yjaB</b> | gi 49175990 ref NC_000913.2 | - | 4211703 | 4212146 | 135.1508191 | 128.2000425 | 104.9922426 | 103.240429  | 117.6468837 | 0.282307586  | 0.630338252 | 0.28237   |
| <b>metA</b> | gi 49175990 ref NC_000913.2 | + | 4212303 | 4213232 | 138.0129145 | 145.3372517 | 92.90372447 | 91.9626221  | 94.21448679 | 0.599982508  | 2.059958616 | 1.2445323 |
| <b>aceB</b> | gi 49175990 ref NC_000913.2 | + | 4213501 | 4215102 | 2732.813973 | 2751.603723 | 2101.822478 | 2088.326139 | 1217.7959   | 0.617079732  | 1.782236792 | 1.0409668 |
| <b>aceA</b> | gi 49175990 ref NC_000913.2 | + | 4215132 | 4216436 | 3070.658244 | 2875.994241 | 2180.283289 | 2117.604652 | 1452.071615 | 0.65357954   | 2.10766489  | 1.2830803 |
| <b>aceK</b> | gi 49175990 ref NC_000913.2 | + | 4216619 | 4218355 | 855.5916896 | 859.5775995 | 580.7128835 | 552.6934989 | 494.8865623 | 0.664561902  | 2.756873517 | 1.816276  |
| <b>arpA</b> | gi 49175990 ref NC_000913.2 | - | 4218324 | 4220510 | 60.39640874 | 64.60400675 | 37.35981537 | 43.61895044 | 38.19494098 | 0.64205979   | 1.872727526 | 1.1049513 |
| <b>iclR</b> | gi 49175990 ref NC_000913.2 | - | 4220827 | 4221651 | 1378.109278 | 1639.454908 | 1349.770881 | 1674.655745 | 1358.590323 | 0.015435009  | 0.079231408 | 0.019423  |
| <b>metH</b> | gi 49175990 ref NC_000913.2 | + | 4221851 | 4225534 | 1342.487058 | 1206.206232 | 1646.719495 | 1448.455551 | 1117.710241 | -0.111422381 | 0.25715429  | 0.0940299 |
| <b>yjbB</b> | gi 49175990 ref NC_000913.2 | + | 4225754 | 4227385 | 617.4423026 | 556.5379965 | 586.2725985 | 551.6849445 | 573.2051303 | 0.058137892  | 0.072957202 | 0.017532  |
| <b>pepE</b> | gi 49175990 ref NC_000913.2 | - | 4227476 | 4228165 | 573.6641447 | 669.6855343 | 1392.945306 | 1057.740224 | 1635.021441 | -1.151378604 | 5.516096185 | 4.1917391 |
| <b>rluF</b> | gi 49175990 ref NC_000913.2 | + | 4228377 | 4229249 | 262.6009683 | 307.8047279 | 210.006727  | 208.6877708 | 256.5998347 | 0.31479395   | 0.867643637 | 0.4103233 |
| <b>yjdB</b> | gi 49175990 ref NC_000913.2 | - | 4229382 | 4229654 | 288.6120701 | 322.9815445 | 388.0970191 | 372.0841431 | 285.3029727 | -0.195439507 | 0.380589185 | 0.1503428 |
| <b>lysC</b> | gi 49175990 ref NC_000913.2 | - | 4229907 | 4231256 | 209.6424366 | 197.5319197 | 186.8642626 | 164.9664585 | 185.0294841 | 0.197325096  | 0.382354909 | 0.151746  |
| <b>pgI</b>  | gi 49175990 ref NC_000913.2 | + | 4231781 | 4233430 | 4076.210353 | 4111.735036 | 4418.449428 | 3864.60409  | 3358.790348 | 0.086809809  | 0.138248414 | 0.0415146 |
| <b>yjbE</b> | gi 49175990 ref NC_000913.2 | + | 4233929 | 4234171 | 23.90169831 | 24.6971692  | 22.7073329  | 24.65216609 | 24.66461762 | 0.013186451  | 0.008832592 | 0         |
| <b>yjbF</b> | gi 49175990 ref NC_000913.2 | + | 4234285 | 4234923 | 5.728068396 | 4.732765067 | 2.822625625 | 1.24206908  | 7.64430065  | 0.420489126  | 0.225402185 | 0.0787822 |
| <b>yjbH</b> | gi 49175990 ref NC_000913.2 | + | 4235657 | 4237753 | 129.3278262 | 129.169637  | 107.0414297 | 81.00386532 | 104.2112896 | 0.414730815  | 1.089808419 | 0.5531722 |
| <b>yjbT</b> | gi 49175990 ref NC_000913.2 | - | 4237800 | 4238078 | 13.96403551 | 12.32673935 | 12.54069503 | 20.12220593 | 22.28479618 | -0.478367707 | 0.591872533 | 0.2618531 |
| <b>psiE</b> | gi 49175990 ref NC_000913.2 | + | 4238348 | 4238758 | 52.23087557 | 55.10055251 | 54.25959752 | 102.6309576 | 75.21483922 | -0.552267604 | 1.188242986 | 0.6157551 |
| <b>xyIE</b> | gi 49175990 ref NC_000913.2 | - | 4238802 | 4240277 | 77.63398602 | 75.97337731 | 112.0977258 | 145.5294224 | 130.1208814 | -0.756271017 | 2.661928108 | 1.7395427 |
| <b>malG</b> | gi 49175990 ref NC_000913.2 | - | 4240649 | 4241539 | 1029.403369 | 952.6205859 | 5937.22422  | 5835.16516  | 3232.498783 | -2.309650956 | 15.94516217 | 13.59052  |
| <b>malF</b> | gi 49175990 ref NC_000913.2 | - | 4241554 | 4243098 | 1693.11684  | 1613.703011 | 8899.848794 | 9349.772578 | 4398.105382 | -2.169940438 | 12.48127582 | 10.484145 |
| <b>malE</b> | gi 49175990 ref NC_000913.2 | - | 4243252 | 4244442 | 4467.236857 | 3991.050582 | 19883.73027 | 27546.74406 | 13166.56931 | -2.240921008 | 13.40674567 | 11.288193 |
| <b>malK</b> | gi 49175990 ref NC_000913.2 | + | 4244807 | 4245922 | 3868.88486  | 3614.946551 | 17274.09051 | 16321.34404 | 10177.05502 | -1.938966402 | 12.1274443  | 10.189628 |
| <b>lamB</b> | gi 49175990 ref NC_000913.2 | + | 4245994 | 4247334 | 4135.215065 | 3813.450911 | 28110.73047 | 29404.78618 | 13398.93217 | -2.545807652 | 15.41852676 | 13.109642 |
| <b>malM</b> | gi 49175990 ref NC_000913.2 | + | 4247577 | 4248497 | 1604.042881 | 1573.824754 | 12438.58543 | 14032.71793 | 6739.116163 | -2.788096006 | 19.04771037 | 16.479189 |
| <b>ubiC</b> | gi 49175990 ref NC_000913.2 | + | 4250529 | 4251026 | 443.9916225 | 390.3110097 | 439.5928261 | 360.013228  | 343.46789   | 0.160084319  | 0.25808656  | 0.0943277 |
| <b>ubiA</b> | gi 49175990 ref NC_000913.2 | + | 4251039 | 4251911 | 689.343454  | 627.7782695 | 601.9302127 | 592.9715474 | 490.4825423 | 0.247872288  | 0.528925818 | 0.2271488 |
| <b>plsB</b> | gi 49175990 ref NC_000913.2 | - | 4252066 | 4254489 | 2154.163113 | 2182.669517 | 2288.776549 | 2200.958271 | 2547.264728 | -0.117092711 | 0.199448498 | 0.0660742 |
| <b>dgkA</b> | gi 49175990 ref NC_000913.2 | + | 4254660 | 4255028 | 498.4365732 | 607.9679057 | 511.5719653 | 561.8017675 | 690.6006444 | -0.125863136 | 0.14702207  | 0.0441955 |
| <b>lexA</b> | gi 49175990 ref NC_000913.2 | + | 4255138 | 4255746 | 5907.386681 | 5943.920668 | 5311.247268 | 4512.666269 | 4012.751751 | 0.372493225  | 0.93857608  | 0.4564142 |
| <b>dinF</b> | gi 49175990 ref NC_000913.2 | + | 4255765 | 4257144 | 713.4774418 | 621.1091043 | 492.467033  | 531.3500393 | 512.6406963 | 0.398297176  | 1.102658708 | 0.5586973 |
| <b>yjbJ</b> | gi 49175990 ref NC_000913.2 | + | 4257260 | 4257469 | 1114.476912 | 1278.508335 | 565.8886329 | 2256.981452 | 1958.011767 | -0.482567157 | 0.610469589 | 0.2696009 |
| <b>zur</b>  | gi 49175990 ref NC_000913.2 | - | 4257511 | 4258026 | 884.3750074 | 953.6425388 | 1087.725815 | 1071.779165 | 993.9897029 | -0.201877434 | 0.420116475 | 0.171766  |
| <b>yjbM</b> | gi 49175990 ref NC_000913.2 | + | 4258622 | 4259329 | 6.246990994 | 6.648742113 | 9.373355747 | 12.22755146 | 7.948373675 | -0.605027292 | 0.471812013 | 0.1985574 |
| <b>dusA</b> | gi 49175990 ref NC_000913.2 | + | 4259737 | 4260729 | 817.841105  | 795.925316  | 503.1243246 | 569.3740813 | 509.3522277 | 0.614136049  | 2.428497112 | 1.5420384 |
| <b>pspG</b> | gi 49175990 ref NC_000913.2 | + | 4260863 | 4261105 | 166.4923128 | 170.0205252 | 131.6489677 | 131.2919912 | 155.7145763 | 0.263298028  | 0.602647373 | 0.2674799 |
| <b>qorA</b> | gi 49175990 ref NC_000913.2 | + | 4261271 | 4262254 | 867.8551609 | 805.4013071 | 1250.670679 | 1426.696501 | 818.3972075 | -0.461737847 | 1.269888247 | 0.6745944 |
| <b>dnaB</b> | gi 49175990 ref NC_000913.2 | + | 4262337 | 4263752 | 1335.029377 | 1389.589549 | 1119.584801 | 1038.287001 | 1097.04044  | 0.325125111  | 0.917660808 | 0.4431971 |
| <b>alr</b>  | gi 49175990 ref NC_000913.2 | + | 4263805 | 4264884 | 637.3298297 | 522.3023622 | 659.7038384 | 550.5447679 | 482.6674394 | 0.079709481  | 0.065719757 | 0.0153529 |
| <b>tyrB</b> | gi 49175990 ref NC_000913.2 | + | 4265137 | 4266330 | 582.953622  | 593.6365178 | 790.8499517 | 684.9423653 | 503.0535994 | -0.152365199 | 0.313535589 | 0.1222592 |
| <b>aphA</b> | gi 49175990 ref NC_000913.2 | + | 4267437 | 4268150 | 1003.439338 | 953.5828074 | 1633.789803 | 2522.479472 | 3084.103442 | -1.319992178 | 5.74835234  | 4.3864112 |
| <b>yjbQ</b> | gi 49175990 ref NC_000913.2 | + | 4268261 | 4268677 | 738.0329623 | 784.5690317 | 983.3992026 | 1082.915509 | 1020.806532 | -0.446776607 | 1.306207725 | 0.6988913 |
| <b>yjbR</b> | gi 49175990 ref NC_000913.2 | + | 4268681 | 4269037 | 378.6761401 | 366.6086647 | 530.9562711 | 435.0828842 | 382.835654  | -0.252626783 | 0.629603517 | 0.2819028 |
| <b>uvrA</b> | gi 49175990 ref NC_000913.2 | - | 4269072 | 4271894 | 2335.537166 | 2189.280863 | 2339.831328 | 2219.808365 | 1912.825741 | 0.084385836  | 0.119342416 | 0.034732  |
| <b>ssb</b>  | gi 49175990 ref NC_000913.2 | + | 4272148 | 4272684 | 2380.132236 | 2364.073954 | 2156.63353  | 1817.548351 | 1898.054254 | 0.286137789  | 0.654366142 | 0.2931605 |
| <b>ycjB</b> | gi 49175990 ref NC_000913.2 | - | 4272783 | 4273064 | 387.2608744 | 404.6353654 | 219.8878738 | 295.7737265 | 287.0238822 | 0.546221449  | 1.93763537  | 1.1531471 |
| <b>ycjC</b> | gi 49175990 ref NC_000913.2 | + | 4273494 | 4275080 | 159.4038231 | 137.6613981 | 115.7193758 | 135.4801804 | 116.7563309 | 0.291362238  | 0.640691831 | 0.2862934 |
| <b>soxS</b> | gi 49175990 ref NC_000913.2 | - | 4275083 | 4275406 | 120.7030471 | 140.6273826 | 70.56939556 | 71.8204835  | 81.75016651 | 0.782732631  | 3.280405448 | 2.2398649 |
| <b>soxR</b> | gi 49175990 ref NC_000913.2 | + | 4275492 | 4275956 | 80.1464984  | 78.8244204  | 77.56490671 | 66.14166955 | 53.00044519 | 0.291507744  | 0.570300741 | 0.2491116 |
| <b>ycjD</b> | gi 49175990 ref NC_000913.2 | + | 4276502 | 4277851 | 199.8697642 | 168.9945942 | 442.4339163 | 433.1950864 | 112.2113396 | -0.788581267 | 1.647496722 | 0.9395852 |
| <b>ycjE</b> | gi 49175990 ref NC_000913.2 | + | 4278003 | 4279652 | 816.8453907 | 736.051609  | 781.3476192 | 783.6386853 | 733.7192148 | 0.035362574  | 0.034841765 | 0.0036811 |

|      |                             |   |         |         |             |             |             |             |             |              |             |           |
|------|-----------------------------|---|---------|---------|-------------|-------------|-------------|-------------|-------------|--------------|-------------|-----------|
| yjcF | gi 49175990 ref NC_000913.2 | - | 4279806 | 4281098 | 19.0487034  | 27.61401923 | 12.07375554 | 9.138765828 | 17.73665531 | 0.801910256  | 1.538098067 | 0.855554  |
| actP | gi 49175990 ref NC_000913.2 | - | 4281276 | 4282925 | 51.09049049 | 68.47393048 | 73.34080847 | 50.64266175 | 51.76612142 | 0.011072341  | 0.033016663 | 0.0030156 |
| yjcH | gi 49175990 ref NC_000913.2 | - | 4282922 | 4283236 | 10.91878507 | 17.15646973 | 6.794717315 | 8.927358988 | 7.8632009   | 0.784574596  | 1.174876815 | 0.605169  |
| acs  | gi 49175990 ref NC_000913.2 | - | 4283436 | 4285394 | 71.50526958 | 84.58623052 | 133.2335332 | 95.58413618 | 114.4244881 | -0.560029974 | 1.572532137 | 0.8806481 |
| nrFA | gi 49175990 ref NC_000913.2 | + | 4285787 | 4287223 | 1216.640282 | 1182.497905 | 5282.002918 | 2101.86072  | 2866.407394 | -1.46272245  | 5.98814683  | 4.5930763 |
| nrFB | gi 49175990 ref NC_000913.2 | + | 4287268 | 4287834 | 387.9597122 | 397.0274723 | 1707.298967 | 683.518604  | 746.5798319 | -1.367361513 | 5.340040114 | 4.0354771 |
| nrFC | gi 49175990 ref NC_000913.2 | + | 4287831 | 4288502 | 366.9320565 | 329.5331873 | 1987.557381 | 820.1463268 | 556.2892802 | -1.611403886 | 5.675080118 | 4.3183907 |
| nrFD | gi 49175990 ref NC_000913.2 | + | 4288499 | 4289455 | 395.8511583 | 367.5399074 | 2369.812189 | 1039.822779 | 661.7527222 | -1.760796954 | 6.468996977 | 5.0204506 |
| nrFE | gi 49175990 ref NC_000913.2 | + | 4289535 | 4291193 | 153.5564618 | 140.5332234 | 827.4369683 | 454.4566434 | 382.0444212 | -1.865329421 | 10.02764584 | 8.217072  |
| nrFF | gi 49175990 ref NC_000913.2 | + | 4291186 | 4291569 | 39.36979423 | 47.53781219 | 294.7998919 | 186.3071035 | 138.5907646 | -2.236098663 | 11.78659011 | 9.8668718 |
| nrFG | gi 49175990 ref NC_000913.2 | + | 4291566 | 4292162 | 52.77631005 | 57.96235652 | 271.2332398 | 231.0248348 | 212.2335597 | -2.102988924 | 14.63417057 | 12.385984 |
| glfP | gi 49175990 ref NC_000913.2 | + | 4292504 | 4293817 | 1151.054403 | 1106.507797 | 934.7203775 | 856.5363814 | 747.3440965 | 0.429360726  | 1.244724509 | 0.6530944 |
| yjcO | gi 49175990 ref NC_000913.2 | - | 4294459 | 4295148 | 194.6545573 | 214.6944074 | 163.5139632 | 178.2227366 | 179.4245907 | 0.219356202  | 0.517920921 | 0.2218965 |
| fdhF | gi 49175990 ref NC_000913.2 | - | 4295242 | 4297389 | 466.1324002 | 487.2694831 | 1112.194307 | 1006.698953 | 776.6788981 | -1.012003344 | 5.048460896 | 3.7730002 |
| mdtP | gi 49175990 ref NC_000913.2 | - | 4297587 | 4299053 | 36.07638657 | 33.21919899 | 38.48392352 | 30.50433571 | 45.76710148 | -0.132024896 | 0.186354434 | 0.0601699 |
| mdtO | gi 49175990 ref NC_000913.2 | - | 4299050 | 4301101 | 46.97819079 | 39.84417471 | 63.78254281 | 63.93906253 | 67.26291412 | -0.563340411 | 1.514115017 | 0.8361667 |
| mdtN | gi 49175990 ref NC_000913.2 | - | 4301101 | 4302132 | 38.04819026 | 47.54692128 | 67.47821705 | 61.72357005 | 62.85257939 | -0.600330508 | 1.557779025 | 0.8711086 |
| yjcS | gi 49175990 ref NC_000913.2 | - | 4302635 | 4304620 | 15.96150015 | 22.85468491 | 21.39505907 | 20.28408423 | 26.77993588 | -0.268898364 | 0.277939752 | 0.104347  |
| alsK | gi 49175990 ref NC_000913.2 | - | 4304893 | 4305822 | 70.68623459 | 69.32560766 | 96.34893207 | 81.92750167 | 79.76725663 | -0.285836067 | 0.630342552 | 0.28237   |
| alsE | gi 49175990 ref NC_000913.2 | - | 4305806 | 4306501 | 35.12463597 | 26.52872396 | 37.89154654 | 43.85792764 | 63.53153992 | -0.633606673 | 1.402078366 | 0.7611136 |
| alsC | gi 49175990 ref NC_000913.2 | - | 4306512 | 4307492 | 56.14390167 | 40.75078572 | 88.03615581 | 76.17360887 | 54.22107954 | -0.537427677 | 1.378993884 | 0.7468031 |
| alsA | gi 49175990 ref NC_000913.2 | - | 4307471 | 4309003 | 43.8303244  | 51.33035623 | 84.49297867 | 77.34884445 | 67.49065853 | -0.693153436 | 2.002168155 | 1.2018135 |
| alsB | gi 49175990 ref NC_000913.2 | - | 4309130 | 4310065 | 43.16042386 | 36.99895989 | 69.72361163 | 79.69662166 | 102.8429392 | -1.060961234 | 3.959240917 | 2.8147094 |
| rpiR | gi 49175990 ref NC_000913.2 | - | 4310124 | 4311014 | 370.9282708 | 378.9802764 | 529.899047  | 586.3458992 | 624.6446083 | -0.639390162 | 2.391455292 | 1.5107057 |
| rpiB | gi 49175990 ref NC_000913.2 | + | 4311373 | 4311822 | 83.07660606 | 52.09549206 | 246.0905659 | 160.5300005 | 131.7389098 | -1.327577947 | 6.000399639 | 4.6026728 |
| yjdP | gi 49175990 ref NC_000913.2 | + | 4311891 | 4312220 | 142.7360931 | 134.8469412 | 251.1029662 | 197.4678823 | 188.6784542 | -0.592820817 | 1.956959235 | 1.1672463 |
| phnP | gi 49175990 ref NC_000913.2 | - | 4312367 | 4313125 | 92.5894877  | 75.91379983 | 99.52361467 | 73.30209076 | 125.1876189 | -0.212901231 | 0.428121208 | 0.1754896 |
| phnO | gi 49175990 ref NC_000913.2 | - | 4313127 | 4313561 | 98.09889699 | 86.38421488 | 72.93285746 | 66.27205571 | 76.19363114 | 0.378248305  | 1.893731031 | 0.4280794 |
| phnN | gi 49175990 ref NC_000913.2 | - | 4313548 | 4314105 | 49.24758715 | 34.09648505 | 39.19917876 | 23.80987959 | 33.61203837 | 0.42319588   | 0.647449513 | 0.2895228 |
| phnM | gi 49175990 ref NC_000913.2 | - | 4314105 | 4315241 | 25.96699576 | 23.72277308 | 20.04961206 | 13.72996625 | 29.94353687 | 0.23250862   | 0.257980844 | 0.0943277 |
| phnL | gi 49175990 ref NC_000913.2 | - | 4315238 | 4315918 | 59.08692635 | 64.6108737  | 47.80922813 | 42.75305365 | 53.69980806 | 0.352460985  | 0.791525272 | 0.3636958 |
| phnK | gi 49175990 ref NC_000913.2 | - | 4316029 | 4316787 | 10.26992536 | 7.565137646 | 9.93045464  | 2.374254699 | 3.456272015 | 0.816786196  | 0.676523631 | 0.3033725 |
| phnJ | gi 49175990 ref NC_000913.2 | - | 4316784 | 4317629 | 4.957111197 | 5.703226735 | 8.063230368 | 7.894698123 | 10.03845572 | -0.698060856 | 0.672766786 | 0.301217  |
| phnI | gi 49175990 ref NC_000913.2 | - | 4317622 | 4318686 | 6.092338545 | 8.572916592 | 9.530104589 | 13.37254897 | 11.23571697 | -0.658998536 | 0.693099497 | 0.3103556 |
| phnH | gi 49175990 ref NC_000913.2 | - | 4318686 | 4319270 | 5.652090945 | 6.657095612 | 7.933158135 | 3.540685183 | 11.04129718 | -0.299647568 | 0.135396701 | 0.0404245 |
| phnF | gi 49175990 ref NC_000913.2 | - | 4319720 | 4320445 | 5.484573612 | 7.619427431 | 5.311589429 | 5.592006383 | 4.527501922 | 0.325514954  | 0.131346609 | 0.0394194 |
| phnD | gi 49175990 ref NC_000913.2 | - | 4321359 | 4322375 | 5.141512523 | 12.42982108 | 8.021085681 | 8.946809301 | 7.881516754 | 0.010963245  | 0.03538716  | 0.0036811 |
| phnC | gi 49175990 ref NC_000913.2 | - | 4322400 | 4323188 | 8.219798621 | 7.586816861 | 6.753483596 | 7.840855767 | 7.844757545 | 0.087274195  | 0.038174925 | 0.0042561 |
| yjdN | gi 49175990 ref NC_000913.2 | - | 4323321 | 4323764 | 54.30576454 | 70.36408808 | 66.55991624 | 71.72725402 | 71.76407538 | -0.200543671 | 0.28314212  | 0.1073228 |
| yjdM | gi 49175990 ref NC_000913.2 | - | 4324422 | 4324757 | 359.5164839 | 307.6669742 | 305.5619888 | 328.5048415 | 350.9660493 | 0.039122455  | 0.03748411  | 0.0039338 |
| yjdA | gi 49175990 ref NC_000913.2 | + | 4325158 | 4327386 | 764.0051134 | 788.3542601 | 1407.559201 | 1571.529649 | 1162.480643 | -0.833610883 | 3.602514429 | 2.5263499 |
| yjcZ | gi 49175990 ref NC_000913.2 | + | 4327383 | 4328261 | 625.9385838 | 623.0701568 | 1475.722318 | 1470.608912 | 903.6472593 | -0.102672788 | 4.492174209 | 3.2888    |
| proP | gi 49175990 ref NC_000913.2 | + | 4328525 | 4330027 | 5766.767117 | 5652.313721 | 5822.313275 | 5684.014643 | 4240.601562 | 0.132772843  | 0.222737072 | 0.0773895 |
| pnrR | gi 49175990 ref NC_000913.2 | + | 4330139 | 4330228 | 172.1244268 | 178.5753695 | 166.3943311 | 124.6945033 | 140.2700823 | 0.292574271  | 0.63772277  | 0.2847665 |
| basS | gi 49175990 ref NC_000913.2 | - | 4330204 | 4331295 | 504.0257538 | 432.0911494 | 477.3253624 | 451.8345665 | 428.6266873 | 0.073999912  | 0.086245455 | 0.0221491 |
| basR | gi 49175990 ref NC_000913.2 | - | 4331305 | 4331973 | 301.6344183 | 297.2804784 | 373.64545   | 363.1342377 | 291.9676589 | -0.186656381 | 0.408497828 | 0.1664982 |
| eptA | gi 49175990 ref NC_000913.2 | - | 4331970 | 4333613 | 114.8547405 | 113.0172862 | 118.1684736 | 124.3883849 | 116.7154788 | -0.070273225 | 0.104725224 | 0.0772729 |
| adiC | gi 49175990 ref NC_000913.2 | - | 4333717 | 4335054 | 67.59014383 | 64.56834461 | 85.75214544 | 64.15561964 | 79.58789568 | -0.197001243 | 0.366150038 | 0.145047  |
| adiY | gi 49175990 ref NC_000913.2 | - | 4335191 | 4335952 | 68.73617849 | 90.3202317  | 32.0810176  | 63.82070403 | 82.4535588  | 0.356167781  | 0.776784397 | 0.3557147 |
| adiA | gi 49175990 ref NC_000913.2 | - | 4336277 | 4338544 | 170.1045297 | 184.2921073 | 163.8868647 | 188.3677228 | 213.9957125 | -0.110873187 | 0.146911798 | 0.0441955 |
| melR | gi 49175990 ref NC_000913.2 | - | 4338743 | 4339651 | 141.9726274 | 140.5639565 | 186.630864  | 225.3460794 | 258.8079563 | -0.672495762 | 2.165716652 | 1.3280853 |
| melA | gi 49175990 ref NC_000913.2 | + | 4339934 | 4341289 | 111.6461246 | 112.0749093 | 481.9743863 | 488.4286622 | 271.0412305 | -1.874300551 | 10.98077673 | 9.1190503 |
| melB | gi 49175990 ref NC_000913.2 | + | 4341392 | 4342813 | 145.8765527 | 172.9304671 | 270.6582236 | 300.2392078 | 238.0547119 | -0.780018157 | 2.824454428 | 1.8696785 |
| yjdF | gi 49175990 ref NC_000913.2 | - | 4342952 | 4343581 | 83.85430259 | 65.45295906 | 95.20267343 | 87.47185752 | 82.00885174 | -0.205628696 | 0.457074797 | 0.1911595 |
| fumB | gi 49175990 ref NC_000913.2 | - | 4343703 | 4345349 | 180.0935173 | 163.3240928 | 519.6923588 | 666.2388208 | 272.3409316 | -1.482725731 | 6.403464877 | 4.9608678 |
| dcuB | gi 49175990 ref NC_000913.2 | - | 4345427 | 4346767 | 177.5614997 | 161.4255343 | 740.2420754 | 906.4487906 | 538.9985093 | -2.089384444 | 15.27902946 | 12.991334 |
| dcuR | gi 49175990 ref NC_000913.2 | - | 4347338 | 4348057 | 320.104697  | 299.1569242 | 375.9370424 | 457.1724205 | 390.465565  | -0.393901947 | 1.119803751 | 0.5686948 |

|      |                             |   |         |         |             |             |             |             |             |              |             |           |
|------|-----------------------------|---|---------|---------|-------------|-------------|-------------|-------------|-------------|--------------|-------------|-----------|
| dcuS | gi 49175990 ref NC_000913.2 | - | 4348054 | 4349685 | 520.326244  | 555.6659914 | 617.1131059 | 690.4347039 | 594.6665995 | -0.248243571 | 0.541691353 | 0.233024  |
| yjdl | gi 49175990 ref NC_000913.2 | + | 4349866 | 4350096 | 68.61005182 | 55.01788945 | 113.1063375 | 184.0121326 | 65.80008833 | -0.946705182 | 2.542176237 | 1.6381255 |
| yjdJ | gi 49175990 ref NC_000913.2 | + | 4350108 | 4350380 | 119.4004289 | 112.0498341 | 130.1471793 | 284.763372  | 136.220589  | -0.679175371 | 1.564231262 | 0.8749619 |
| yjdK | gi 49175990 ref NC_000913.2 | + | 4350607 | 4350903 | 150.9441956 | 142.4447662 | 143.0395524 | 162.7729167 | 238.3049182 | -0.313299533 | 0.606227965 | 0.2683873 |
| yjdO | gi 49175990 ref NC_000913.2 | + | 4350931 | 4351104 | 68.72793487 | 69.33475461 | 53.03106473 | 46.12555274 | 57.08745052 | 0.406718998  | 0.931333008 | 0.4525949 |
| lysU | gi 49175990 ref NC_000913.2 | - | 4351223 | 4352740 | 7186.394696 | 7297.406873 | 6809.423273 | 5888.363901 | 5791.663828 | 0.238700199  | 0.512674363 | 0.2202171 |
| yjdL | gi 49175990 ref NC_000913.2 | - | 4352977 | 4354434 | 101.2718808 | 113.0641834 | 72.52474528 | 100.7381404 | 99.68824497 | 0.208868836  | 0.486248763 | 0.2051216 |
| cadA | gi 49175990 ref NC_000913.2 | - | 4354493 | 4356640 | 164.8255355 | 155.7422578 | 69.58292336 | 85.13200052 | 87.37500545 | 0.987944071  | 4.655024896 | 3.4289259 |
| cadB | gi 49175990 ref NC_000913.2 | - | 4356720 | 4358054 | 84.95184981 | 92.15607542 | 33.12873469 | 36.85793918 | 27.09758751 | 1.441682834  | 7.266490027 | 5.7331066 |
| cadC | gi 49175990 ref NC_000913.2 | - | 4358419 | 4359957 | 219.1341589 | 251.7555319 | 189.4986179 | 219.91339   | 306.764414  | -0.053646146 | 0.020430305 | 0         |
| yjdC | gi 49175990 ref NC_000913.2 | - | 4360756 | 4361331 | 719.1151046 | 761.7718533 | 822.9463094 | 719.7554597 | 589.2918849 | 0.06316453   | 0.106494033 | 0.0284416 |
| dsbD | gi 49175990 ref NC_000913.2 | - | 4361368 | 4363065 | 601.5721367 | 557.5004215 | 618.077001  | 585.2934791 | 590.0708532 | -0.031453166 | 0.071224447 | 0.0170551 |
| cutA | gi 49175990 ref NC_000913.2 | - | 4363041 | 4363379 | 180.4035859 | 182.3640182 | 210.520542  | 227.2563005 | 144.0716607 | -0.091747199 | 0.145116626 | 0.0434625 |
| dcuA | gi 49175990 ref NC_000913.2 | - | 4363495 | 4364796 | 3759.614816 | 3618.760068 | 7574.864055 | 6879.317985 | 5893.903026 | -0.863867722 | 3.651959323 | 2.5683842 |
| aspA | gi 49175990 ref NC_000913.2 | - | 4364914 | 4366350 | 13693.49976 | 15644.41063 | 20117.36569 | 32571.00286 | 28598.48718 | -0.924811262 | 3.147121092 | 2.1359972 |
| fxsA | gi 49175990 ref NC_000913.2 | + | 4366687 | 4367163 | 199.4960181 | 235.6199753 | 269.037273  | 222.2493633 | 272.4453633 | -0.244731175 | 0.468783739 | 0.1963434 |
| yjeH | gi 49175990 ref NC_000913.2 | - | 4367179 | 4368435 | 176.2106911 | 173.8607974 | 174.7314816 | 166.9944505 | 142.6858759 | -0.021076913 | 0.08723988  | 0.0222447 |
| groS | gi 49175990 ref NC_000913.2 | + | 4368711 | 4369004 | 3262.979234 | 3173.303356 | 939.871012  | 873.7157924 | 1273.737504 | 1.642165249  | 11.24060259 | 9.3630819 |
| groL | gi 49175990 ref NC_000913.2 | + | 4369048 | 4370694 | 12205.48415 | 12051.20094 | 2752.025151 | 2510.575995 | 3520.644199 | 2.047770819  | 17.2606585  | 14.796872 |
| yjeI | gi 49175990 ref NC_000913.2 | + | 4370832 | 4371185 | 1027.801797 | 1048.597453 | 1579.673063 | 1521.317251 | 1300.357269 | -0.495750993 | 1.570838072 | 0.8794782 |
| yjeJ | gi 49175990 ref NC_000913.2 | - | 4371388 | 4372257 | 127.9355681 | 133.9368974 | 144.7983011 | 159.0929607 | 144.7736091 | -0.1994763   | 0.372685421 | 0.1465864 |
| yjeK | gi 49175990 ref NC_000913.2 | - | 4372652 | 4373680 | 513.7929809 | 587.0413408 | 385.4050633 | 423.8491087 | 489.9174452 | 0.318905305  | 0.965309299 | 0.4703393 |
| efp  | gi 49175990 ref NC_000913.2 | + | 4373722 | 4374288 | 2774.021927 | 3164.832893 | 1981.433092 | 1839.05527  | 2775.666065 | 0.406756462  | 1.146369741 | 0.5876079 |
| ecnA | gi 49175990 ref NC_000913.2 | + | 4374340 | 4374465 | 113.7576915 | 133.0295941 | 106.2374001 | 94.39707834 | 123.1517648 | 0.172228701  | 0.372991563 | 0.146713  |
| ecnB | gi 49175990 ref NC_000913.2 | + | 4374576 | 4374722 | 4889.931035 | 6399.960238 | 5043.186687 | 6831.16273  | 8797.090248 | -0.347740674 | 0.563348548 | 0.2461331 |
| sugE | gi 49175990 ref NC_000913.2 | + | 4374898 | 4375215 | 421.7460753 | 471.153071  | 479.9869278 | 473.0495563 | 414.125697  | -0.041077159 | 0.043085688 | 0.0059267 |
| blc  | gi 49175990 ref NC_000913.2 | - | 4375212 | 4375745 | 545.6342172 | 570.8535154 | 579.5914763 | 589.6123291 | 509.472447  | -0.006976905 | 0.000430392 | 0         |
| ampC | gi 49175990 ref NC_000913.2 | - | 4375834 | 4376967 | 272.3990389 | 286.8614766 | 493.5523401 | 453.7966503 | 262.0743973 | -0.517803437 | 1.383929591 | 0.7510399 |
| frdD | gi 49175990 ref NC_000913.2 | - | 4377030 | 4377389 | 1447.475895 | 1452.259523 | 3761.332658 | 3735.207749 | 1924.617935 | -1.100011728 | 4.201238047 | 3.0290742 |
| frdC | gi 49175990 ref NC_000913.2 | - | 4377400 | 4377795 | 852.1994916 | 917.5489162 | 2552.911028 | 2655.493324 | 1365.969811 | -1.30598504  | 5.634058751 | 4.2913161 |
| frdB | gi 49175990 ref NC_000913.2 | - | 4377806 | 4378540 | 1963.809309 | 1875.852041 | 6212.212171 | 5362.087593 | 2435.178545 | -1.249813759 | 4.667706907 | 3.4380037 |
| frdA | gi 49175990 ref NC_000913.2 | - | 4378533 | 4380341 | 7624.297161 | 6525.122773 | 26098.20904 | 21777.90167 | 9453.921685 | -1.382348025 | 5.067674309 | 3.7881737 |
| yjeA | gi 49175990 ref NC_000913.2 | + | 4380666 | 4381643 | 488.7260806 | 530.0281039 | 334.3846972 | 341.9202136 | 330.9519287 | 0.589588736  | 2.308368791 | 1.4419641 |
| yjeM | gi 49175990 ref NC_000913.2 | + | 4381862 | 4383364 | 148.3675944 | 113.8744334 | 166.4836959 | 185.0433176 | 216.221018  | -0.503991085 | 1.479003812 | 0.8106008 |
| yjeN | gi 49175990 ref NC_000913.2 | + | 4383416 | 4383730 | 50.70498494 | 44.60128799 | 50.61076858 | 41.76782917 | 66.9497055  | -0.143879601 | 0.215391363 | 0.0745623 |
| yjeO | gi 49175990 ref NC_000913.2 | + | 4383727 | 4384041 | 82.77950982 | 77.85955633 | 73.62259514 | 79.73809639 | 106.1966759 | -0.109090692 | 0.160438574 | 0.0496823 |
| yjeP | gi 49175990 ref NC_000913.2 | - | 4384070 | 4387393 | 1136.530063 | 1096.061388 | 1105.271601 | 983.5266282 | 1272.859991 | -0.001293871 | 0.004381249 | 0         |
| psd  | gi 49175990 ref NC_000913.2 | - | 4387415 | 4388383 | 1453.556038 | 1557.720339 | 1204.864685 | 1302.662579 | 1211.535045 | 0.268265211  | 0.715816073 | 0.3189698 |
| rsgA | gi 49175990 ref NC_000913.2 | - | 4388480 | 4389532 | 1390.650117 | 1409.522862 | 1489.884113 | 1512.378651 | 1429.174009 | -0.078530423 | 0.13466799  | 0.04023   |
| orn  | gi 49175990 ref NC_000913.2 | + | 4389627 | 4390172 | 664.8519247 | 703.8329299 | 622.0733386 | 605.419906  | 582.2669737 | 0.176289217  | 0.409922164 | 0.1671417 |
| yjeV | gi 49175990 ref NC_000913.2 | + | 4390915 | 4390968 | 64.25390291 | 66.49337701 | 35.39042656 | 50.4108052  | 59.1677285  | 0.415331676  | 0.953538006 | 0.4645752 |
| queG | gi 49175990 ref NC_000913.2 | - | 4390951 | 4392090 | 1117.89857  | 1186.339017 | 1268.43218  | 1353.09982  | 1219.44371  | -0.161424111 | 0.3121104   | 0.1218549 |
| yjeF | gi 49175990 ref NC_000913.2 | + | 4392089 | 4393636 | 748.5512916 | 585.9188514 | 721.0315884 | 641.3126441 | 568.983191  | 0.094898678  | 0.09108604  | 0.023835  |
| yjeE | gi 49175990 ref NC_000913.2 | + | 4393608 | 4394069 | 251.1485805 | 247.8910264 | 253.3944375 | 212.9289209 | 143.0202581 | 0.316452501  | 0.63373619  | 0.2838932 |
| amiB | gi 49175990 ref NC_000913.2 | + | 4394088 | 4395425 | 968.6495579 | 943.14628   | 961.6892939 | 937.2677509 | 889.6421394 | 0.046853882  | 0.07178506  | 0.0170551 |
| mutL | gi 49175990 ref NC_000913.2 | + | 4395435 | 4397282 | 1508.078653 | 1501.646112 | 1489.824885 | 1552.653029 | 1347.393296 | 0.042445868  | 0.070368286 | 0.0170551 |
| miaA | gi 49175990 ref NC_000913.2 | + | 4397275 | 4398225 | 4778.302796 | 5117.614985 | 4688.579429 | 4600.077337 | 4583.436152 | 0.088809958  | 0.182858779 | 0.0583818 |
| hfq  | gi 49175990 ref NC_000913.2 | + | 4398311 | 4398619 | 4111.831804 | 4574.341319 | 4153.173747 | 4428.576067 | 4970.173981 | -0.0785051   | 0.090302228 | 0.023835  |
| hflX | gi 49175990 ref NC_000913.2 | + | 4398695 | 4399975 | 4539.557974 | 4339.663847 | 3975.543277 | 3624.651756 | 3191.603091 | 0.318255324  | 0.760836065 | 0.3462677 |
| hflK | gi 49175990 ref NC_000913.2 | + | 4400061 | 4401320 | 4952.398773 | 4522.005676 | 4458.379035 | 3853.459294 | 3640.236968 | 0.272234057  | 0.574191699 | 0.2509583 |
| hflC | gi 49175990 ref NC_000913.2 | + | 4401323 | 4402327 | 3729.860483 | 3689.059265 | 3170.646855 | 2777.290219 | 3203.563966 | 0.286852403  | 0.707613514 | 0.3175455 |
| yjeT | gi 49175990 ref NC_000913.2 | + | 4402409 | 4402606 | 59.60864278 | 68.42606533 | 63.84001169 | 40.55869144 | 39.48617211 | 0.420045952  | 0.861512183 | 0.4069338 |
| purA | gi 49175990 ref NC_000913.2 | + | 4402710 | 4404008 | 4143.689464 | 4224.767842 | 6230.874572 | 5330.028226 | 5132.124133 | -0.404649435 | 1.111259634 | 0.5646786 |
| nsrR | gi 49175990 ref NC_000913.2 | + | 4404213 | 4404638 | 823.6450547 | 773.1130345 | 901.8911023 | 880.052017  | 794.3656416 | -0.092317292 | 0.200999123 | 0.0670463 |
| rnr  | gi 49175990 ref NC_000913.2 | + | 4404677 | 4407118 | 4484.303272 | 3973.950128 | 4881.609083 | 4578.64825  | 3637.052785 | -0.019267776 | 0.069112796 | 0.0165853 |
| rlmB | gi 49175990 ref NC_000913.2 | + | 4407298 | 4408029 | 736.9701609 | 738.9505737 | 662.2764859 | 685.0354207 | 713.3461645 | 0.100421071  | 0.207452395 | 0.0702944 |
| yjfJ | gi 49175990 ref NC_000913.2 | + | 4408576 | 4409274 | 12.39975609 | 15.22104653 | 7.119879454 | 13.37133082 | 13.37771029 | 0.253953463  | 0.273926483 | 0.1020023 |

|      |                             |   |         |         |             |             |             |             |             |              |             |           |
|------|-----------------------------|---|---------|---------|-------------|-------------|-------------|-------------|-------------|--------------|-------------|-----------|
| yjfK | gi 49175990 ref NC_000913.2 | + | 4409325 | 4409984 | 10.64140333 | 11.40121402 | 11.64061311 | 6.838457221 | 8.989110564 | 0.27572301   | 0.163756378 | 0.0518508 |
| yjfL | gi 49175990 ref NC_000913.2 | + | 4410002 | 4410400 | 7.102866515 | 4.7176594   | 4.13409557  | 2.373102473 | 8.77781104  | 0.239383283  | 0.104412139 | 0.0277229 |
| yjfM | gi 49175990 ref NC_000913.2 | + | 4410410 | 4411048 | 6.019621319 | 9.534957603 | 6.794720567 | 7.859212864 | 8.931663118 | -0.0553319   | 0           | 0         |
| yjfC | gi 49175990 ref NC_000913.2 | + | 4411051 | 4412214 | 55.47573867 | 56.03753929 | 44.36618647 | 62.54467804 | 51.64333882 | 0.066714903  | 0.103075878 | 0.0275684 |
| aidB | gi 49175990 ref NC_000913.2 | + | 4412298 | 4413923 | 215.7332478 | 177.5314637 | 237.7271701 | 213.9802976 | 140.7595954 | 0.034157665  | 0.003699731 | 0         |
| yjfN | gi 49175990 ref NC_000913.2 | - | 4414040 | 4414315 | 525.8702828 | 484.3624459 | 1259.700059 | 1758.476359 | 1183.787202 | -1.467525305 | 8.750423785 | 7.0590548 |
| bsmA | gi 49175990 ref NC_000913.2 | - | 4414464 | 4414793 | 1927.007124 | 1949.965    | 3985.455304 | 5383.587148 | 5772.107563 | -1.39849431  | 7.71968235  | 6.1391517 |
| yjfP | gi 49175990 ref NC_000913.2 | + | 4414975 | 4415724 | 199.1801276 | 211.8296009 | 230.5506127 | 231.9517965 | 189.8312199 | -0.085130719 | 0.127395475 | 0.0373086 |
| ulaR | gi 49175990 ref NC_000913.2 | - | 4415721 | 4416476 | 176.0565566 | 173.8060502 | 150.3771263 | 161.4900628 | 181.5309384 | 0.084870924  | 0.147908221 | 0.0446157 |
| ulaG | gi 49175990 ref NC_000913.2 | - | 4416584 | 4417648 | 37.02161897 | 40.86302249 | 55.27703549 | 49.32311869 | 41.69528578 | -0.325384973 | 0.60111695  | 0.2668653 |
| ulaA | gi 49175990 ref NC_000913.2 | + | 4418003 | 4419400 | 46.05192828 | 45.58375134 | 65.99114779 | 57.25477567 | 57.28453019 | -0.384377202 | 0.842415705 | 0.3956627 |
| ulaB | gi 49175990 ref NC_000913.2 | + | 4419416 | 4419721 | 29.74466889 | 27.52325403 | 53.09448376 | 35.93220461 | 23.94610338 | -0.36161262  | 0.570342909 | 0.2491116 |
| ulaC | gi 49175990 ref NC_000913.2 | + | 4419731 | 4420195 | 27.14853209 | 16.05275921 | 31.65027265 | 28.07733949 | 28.09183116 | -0.381386852 | 0.649261255 | 0.2905748 |
| ulaD | gi 49175990 ref NC_000913.2 | + | 4420209 | 4420859 | 62.80132233 | 53.13531939 | 94.63018676 | 71.88075998 | 67.51642683 | -0.394042065 | 0.966707668 | 0.4714042 |
| ulaE | gi 49175990 ref NC_000913.2 | + | 4420869 | 4421723 | 65.56141846 | 66.48693992 | 97.69363544 | 102.8630089 | 62.14844885 | -0.400470428 | 0.885759787 | 0.4222835 |
| ulaF | gi 49175990 ref NC_000913.2 | + | 4421723 | 4424099 | 80.82762484 | 77.86765566 | 143.3494986 | 98.88494022 | 97.83167859 | -0.491020027 | 1.383688126 | 0.7510399 |
| yjfY | gi 49175990 ref NC_000913.2 | - | 4422539 | 4422814 | 28.05083489 | 34.2351598  | 20.79326111 | 37.91853826 | 35.76851796 | -0.055851102 | 0           | 0         |
| rpsF | gi 49175990 ref NC_000913.2 | + | 4423141 | 4423536 | 6151.365652 | 6582.224295 | 4063.679254 | 4443.395343 | 6755.405132 | 0.298175585  | 0.721025669 | 0.3222318 |
| priB | gi 49175990 ref NC_000913.2 | + | 4423543 | 4423857 | 2994.582284 | 3099.248182 | 2056.17027  | 2174.193763 | 3225.390989 | 0.275655158  | 0.644178406 | 0.287602  |
| rpsR | gi 49175990 ref NC_000913.2 | + | 4423862 | 4424089 | 2893.912516 | 2760.125919 | 1881.423022 | 2115.935591 | 3416.991506 | 0.182337057  | 0.351749307 | 0.1397671 |
| rpII | gi 49175990 ref NC_000913.2 | + | 4424131 | 4424580 | 4708.297757 | 4991.284996 | 3239.682066 | 3433.263477 | 5241.08674  | 0.265558493  | 0.624575346 | 0.2789898 |
| yjfZ | gi 49175990 ref NC_000913.2 | - | 4424651 | 4425445 | 72.6107279  | 70.27104589 | 28.97872961 | 39.40834344 | 66.68182919 | 0.647136356  | 1.587013862 | 0.8893215 |
| ytfB | gi 49175990 ref NC_000913.2 | - | 4426102 | 4426740 | 382.2165263 | 398.9359867 | 498.5669389 | 463.0918047 | 459.9846832 | -0.280761016 | 0.690359077 | 0.3092004 |
| fkIB | gi 49175990 ref NC_000913.2 | + | 4426958 | 4427578 | 1115.740717 | 1065.662876 | 1028.03607  | 894.9084493 | 1063.256564 | 0.141036848  | 0.267431224 | 0.0984259 |
| cycA | gi 49175990 ref NC_000913.2 | + | 4427887 | 4429299 | 562.9428284 | 543.2717821 | 451.7071435 | 534.6591328 | 523.7708354 | 0.133222595  | 0.280730723 | 0.1060234 |
| ytfE | gi 49175990 ref NC_000913.2 | - | 4429344 | 4430006 | 163.2149712 | 173.8369155 | 216.9486566 | 153.987015  | 208.4930501 | -0.1957933   | 0.366863886 | 0.145076  |
| ytfF | gi 49175990 ref NC_000913.2 | - | 4430114 | 4431079 | 180.1910359 | 195.6911736 | 198.6278898 | 160.5775383 | 193.9670927 | 0.022293262  | 0.042821391 | 0.0058947 |
| qorB | gi 49175990 ref NC_000913.2 | - | 4431187 | 4432047 | 89.12968214 | 82.6001297  | 93.86015291 | 72.02579915 | 94.09334169 | 0.602077171  | 0.00269874  | 0         |
| ytfH | gi 49175990 ref NC_000913.2 | + | 4432136 | 4432516 | 72.12913311 | 85.53708378 | 75.91183226 | 89.53307334 | 77.47855692 | -0.062967294 | 0.039135044 | 0.004293  |
| cpdB | gi 49175990 ref NC_000913.2 | - | 4432645 | 4434588 | 449.3210959 | 438.7980759 | 430.2855956 | 473.0822274 | 483.377307  | -0.059692679 | 0.097329944 | 0.0262976 |
| cysQ | gi 49175990 ref NC_000913.2 | + | 4434778 | 4435518 | 476.558504  | 451.1315401 | 515.4376711 | 470.8499315 | 400.7527106 | 0.02106267   | 0.008980711 | 0         |
| ytfI | gi 49175990 ref NC_000913.2 | + | 4435730 | 4436668 | 21.05852852 | 27.5950554  | 14.23187086 | 33.34618121 | 27.96001357 | -0.100717867 | 0.000768947 | 0         |
| ytfJ | gi 49175990 ref NC_000913.2 | - | 4436731 | 4437285 | 226.0965522 | 209.8730197 | 251.114502  | 267.961205  | 283.6839928 | -0.28999928  | 0.704096228 | 0.3153531 |
| ytfK | gi 49175990 ref NC_000913.2 | + | 4437610 | 4437816 | 2662.050161 | 2750.666468 | 1469.00449  | 2337.229078 | 2265.630072 | 0.393263848  | 1.05817998  | 0.5287486 |
| ytfL | gi 49175990 ref NC_000913.2 | - | 4437895 | 4439238 | 701.6559059 | 699.0554957 | 475.6159492 | 535.523478  | 618.8416959 | 0.387334565  | 1.132544391 | 0.5768599 |
| msrA | gi 49175990 ref NC_000913.2 | - | 4439561 | 4440199 | 565.3367183 | 567.0347714 | 551.7614145 | 599.5532882 | 454.6360916 | 0.082818976  | 0.148094876 | 0.0446157 |
| ytfM | gi 49175990 ref NC_000913.2 | + | 4440405 | 4442138 | 985.3177465 | 889.9218167 | 813.2683225 | 826.2420896 | 784.1683356 | 0.229804616  | 0.504058427 | 0.2147057 |
| ytfN | gi 49175990 ref NC_000913.2 | + | 4442135 | 4445914 | 2445.776831 | 2415.361019 | 2300.572882 | 2431.641377 | 2177.422275 | 0.079365683  | 0.140493135 | 0.0419272 |
| ytfP | gi 49175990 ref NC_000913.2 | + | 4445917 | 4446258 | 446.4619977 | 482.5357035 | 375.1961265 | 469.7203768 | 532.477588  | -0.007766669 | 0.028483699 | 0.0017411 |
| chpS | gi 49175990 ref NC_000913.2 | + | 4446470 | 4446721 | 88.3033569  | 68.29830854 | 127.0108556 | 91.95712122 | 60.00227994 | -0.192687421 | 0.406213005 | 0.1653288 |
| chpB | gi 49175990 ref NC_000913.2 | + | 4446715 | 4447065 | 99.09500786 | 96.86833462 | 131.1966745 | 100.886797  | 66.70942262 | 0.000782125  | 0.020583896 | 0         |
| ppa  | gi 49175990 ref NC_000913.2 | - | 4447145 | 4447675 | 7187.586113 | 8920.73438  | 6410.357637 | 6782.046412 | 9451.12306  | 0.050399962  | 0.157021233 | 0.0487535 |
| ytfQ | gi 49175990 ref NC_000913.2 | + | 4447985 | 4448941 | 76.03927909 | 65.48476607 | 64.67183696 | 114.890836  | 74.24069155 | -0.255017108 | 0.437165511 | 0.1786609 |
| ytfR | gi 49175990 ref NC_000913.2 | + | 4449081 | 4450583 | 98.74723605 | 86.3819026  | 119.461271  | 117.765831  | 123.3539003 | -0.359992976 | 0.952915213 | 0.4645752 |
| ytfT | gi 49175990 ref NC_000913.2 | + | 4450594 | 4451619 | 44.9964094  | 55.14394228 | 66.89569845 | 50.57294934 | 48.40833378 | -0.152313373 | 0.203337538 | 0.0682219 |
| yjfF | gi 49175990 ref NC_000913.2 | + | 4451606 | 4452601 | 76.60556512 | 88.37768598 | 134.1425426 | 152.2847183 | 125.7973699 | -0.75421776  | 2.603569699 | 1.6873822 |
| fbp  | gi 49175990 ref NC_000913.2 | - | 4452634 | 4453632 | 1206.186566 | 1299.373897 | 743.0638694 | 687.4611709 | 825.3828883 | 0.72478209   | 3.165804369 | 2.1524871 |
| mpl  | gi 49175990 ref NC_000913.2 | + | 4453808 | 4455181 | 1233.746149 | 1175.83996  | 1288.978435 | 1120.133655 | 1107.287276 | 0.054262626  | 0.071574068 | 0.0170551 |
| yjgA | gi 49175990 ref NC_000913.2 | - | 4455337 | 4455888 | 691.8308959 | 766.5421165 | 696.7809396 | 696.3253223 | 778.3221929 | -0.00694854  | 0.019970903 | 0         |
| pmbA | gi 49175990 ref NC_000913.2 | + | 4455982 | 4457334 | 942.2493977 | 890.8929163 | 1115.935933 | 894.7864942 | 803.4895371 | -0.010811977 | 0.049099035 | 0.0081378 |
| nrdG | gi 49175990 ref NC_000913.2 | - | 4457923 | 4458387 | 527.1333362 | 586.0788107 | 966.435652  | 833.0887282 | 778.7027788 | -0.631932251 | 0.377007068 | 1.5010919 |
| nrdD | gi 49175990 ref NC_000913.2 | - | 4458545 | 4460683 | 3093.316451 | 2944.388414 | 4824.704629 | 4430.757119 | 3950.994337 | -0.529565476 | 1.752818644 | 1.0202756 |
| treC | gi 49175990 ref NC_000913.2 | - | 4461077 | 4462732 | 12197.82764 | 12330.45708 | 20330.23341 | 16913.83176 | 19325.18529 | -0.616017652 | 2.014551966 | 1.2094582 |
| treB | gi 49175990 ref NC_000913.2 | - | 4462782 | 4464203 | 21019.25126 | 21144.70764 | 29308.59897 | 24977.18009 | 32613.00147 | -0.458262528 | 1.224680167 | 0.6392514 |
| treR | gi 49175990 ref NC_000913.2 | - | 4464322 | 4465269 | 188.0068245 | 188.0585741 | 145.8054431 | 191.7122739 | 232.8785933 | -0.032547951 | 0.013540749 | 0         |
| mgtL | gi 49175990 ref NC_000913.2 | + | 4465454 | 4465507 | 2025.061056 | 2286.251613 | 1498.300183 | 1962.18441  | 2902.154679 | -0.016708364 | 0.036338243 | 0.0036811 |
| mgtA | gi 49175990 ref NC_000913.2 | + | 4465648 | 4468344 | 1193.395759 | 1126.445228 | 805.0085681 | 709.8476195 | 772.8542004 | 0.617583994  | 2.307266368 | 1.4416449 |

|      |                             |   |         |         |             |             |             |             |             |              |             |           |
|------|-----------------------------|---|---------|---------|-------------|-------------|-------------|-------------|-------------|--------------|-------------|-----------|
| yjgF | gi 49175990 ref NC_000913.2 | - | 4468550 | 4468936 | 3448.481657 | 3365.166965 | 3650.290653 | 3653.983189 | 4493.334007 | -0.20904569  | 0.435390243 | 0.1778513 |
| pyrI | gi 49175990 ref NC_000913.2 | - | 4469009 | 4469470 | 95.98047864 | 117.8489646 | 90.58752385 | 104.1746019 | 99.81765658 | 0.091847166  | 0.209230929 | 0.0711947 |
| pyrB | gi 49175990 ref NC_000913.2 | - | 4469483 | 4470418 | 142.2163435 | 129.1330362 | 134.920777  | 134.39296   | 102.3878438 | 0.149701353  | 0.238907358 | 0.0858143 |
| pyrL | gi 49175990 ref NC_000913.2 | - | 4470422 | 4470556 | 44.33937888 | 39.85972407 | 46.38814564 | 49.23223961 | 40.52383926 | -0.093951632 | 0.134726674 | 0.04023   |
| yjgH | gi 49175990 ref NC_000913.2 | - | 4470837 | 4471232 | 65.01051324 | 63.62625438 | 38.48724832 | 81.38353068 | 64.99916318 | 0.040423062  | 0.076158197 | 0.0184999 |
| yjgI | gi 49175990 ref NC_000913.2 | - | 4471363 | 4472076 | 105.7567294 | 114.9540366 | 74.68113231 | 68.64577668 | 101.6856137 | 0.0418034834 | 1.115202382 | 0.5667635 |
| yjgJ | gi 49175990 ref NC_000913.2 | + | 4472147 | 4472740 | 85.92351811 | 104.5460048 | 68.62474887 | 99.58968188 | 97.43871375 | 0.065725898  | 0.168267822 | 0.052933  |
| tabA | gi 49175990 ref NC_000913.2 | + | 4472885 | 4473337 | 322.5128337 | 312.469934  | 441.1613619 | 562.5378402 | 491.3610398 | -0.654501272 | 2.387794607 | 1.508745  |
| yjgL | gi 49175990 ref NC_000913.2 | + | 4473460 | 4475274 | 23.52921414 | 31.40236019 | 15.37295959 | 30.04592414 | 25.74086925 | 0.162369304  | 0.252745848 | 0.0921555 |
| argI | gi 49175990 ref NC_000913.2 | - | 4475330 | 4476334 | 51.63593422 | 38.86275711 | 45.8903071  | 39.2373713  | 31.6262961  | 0.259410237  | 0.338204096 | 0.1334652 |
| rraB | gi 49175990 ref NC_000913.2 | + | 4476496 | 4476912 | 2038.531281 | 2160.845695 | 2812.361157 | 3767.893279 | 3522.146621 | -0.702680973 | 2.481045682 | 1.5862986 |
| yjgM | gi 49175990 ref NC_000913.2 | - | 4477057 | 4477560 | 105.320024  | 106.3782782 | 68.09882058 | 78.43653139 | 80.67458227 | 0.475126714  | 1.399345074 | 0.7607065 |
| yjgN | gi 49175990 ref NC_000913.2 | + | 4477753 | 4478949 | 14.7931162  | 10.40041227 | 14.18146858 | 7.976171785 | 10.13114321 | 0.274285702  | 0.17201573  | 0.0541629 |
| valS | gi 49175990 ref NC_000913.2 | - | 4479005 | 4481860 | 4595.209748 | 4244.666197 | 3379.20614  | 3157.308997 | 3624.166554 | 0.395348527  | 1.090532803 | 0.5531888 |
| holC | gi 49175990 ref NC_000913.2 | - | 4481860 | 4482303 | 549.6465199 | 537.5790407 | 439.3383568 | 430.6323796 | 486.6746346 | 0.266605869  | 0.679955127 | 0.304558  |
| pepA | gi 49175990 ref NC_000913.2 | - | 4482463 | 4483974 | 2649.225371 | 2428.622769 | 2057.196833 | 1799.550699 | 1798.255901 | 0.449253969  | 1.232561309 | 0.644367  |
| lptF | gi 49175990 ref NC_000913.2 | + | 4484241 | 4485341 | 1372.114578 | 1243.252786 | 1646.629503 | 1409.252568 | 1107.609866 | -0.057261449 | 0.142789407 | 0.0427363 |
| lptG | gi 49175990 ref NC_000913.2 | + | 4485341 | 4486423 | 1494.900607 | 1457.944872 | 1308.178281 | 1350.914325 | 1266.521496 | 0.177734003  | 0.377296993 | 0.1485519 |
| yjgR | gi 49175990 ref NC_000913.2 | - | 4486584 | 4488086 | 354.7115909 | 341.9117171 | 365.1034108 | 340.6025614 | 214.8520798 | 0.20195251   | 0.347525663 | 0.137458  |
| idnR | gi 49175990 ref NC_000913.2 | - | 4488164 | 4489162 | 73.01189261 | 77.9019426  | 71.63358113 | 70.64907008 | 70.68553054 | 0.081372312  | 0.134442066 | 0.0401366 |
| idnT | gi 49175990 ref NC_000913.2 | - | 4489229 | 4490548 | 175.3323238 | 221.4002905 | 230.9556293 | 253.2242899 | 218.8806122 | -0.272645664 | 0.500725172 | 0.2134435 |
| idnO | gi 49175990 ref NC_000913.2 | - | 4490610 | 4491374 | 25.67317194 | 17.97876426 | 25.57327942 | 35.67067304 | 27.01429043 | -0.400688662 | 0.685778966 | 0.3075159 |
| idnD | gi 49175990 ref NC_000913.2 | - | 4491398 | 4492429 | 18.93461337 | 9.407256861 | 12.45122955 | 21.14795952 | 17.93085663 | -0.228671629 | 0.253501354 | 0.0923968 |
| idnK | gi 49175990 ref NC_000913.2 | + | 4492646 | 4493209 | 22.24261151 | 30.45662022 | 38.87347456 | 50.28203208 | 42.67349106 | -0.773672983 | 1.787268244 | 1.0436412 |
| yjgB | gi 49175990 ref NC_000913.2 | - | 4493213 | 4494232 | 682.4305731 | 616.3768056 | 833.5215929 | 665.0057324 | 649.6986617 | -0.114033452 | 0.276633055 | 0.1038347 |
| insC | gi 49175990 ref NC_000913.2 | + | 4496295 | 4496660 | 805.513716  | 865.3081075 | 883.4699259 | 799.5465132 | 901.7775941 | -0.052716823 | 0.073752017 | 0.0175681 |
| insD | gi 49175990 ref NC_000913.2 | + | 4496618 | 4497523 | 1317.803837 | 1209.065452 | 1208.312754 | 1148.050054 | 1070.287223 | 0.162283854  | 0.306735967 | 0.1187544 |
| yjgZ | gi 49175990 ref NC_000913.2 | + | 4499283 | 4499612 | 16.26050681 | 18.05881399 | 9.567001512 | 10.17205274 | 15.53723763 | 0.525345414  | 0.696483255 | 0.3105837 |
| insG | gi 49175990 ref NC_000913.2 | - | 4500126 | 4501454 | 210.6271175 | 267.9469134 | 213.7987448 | 211.9856623 | 236.5511583 | 0.081211751  | 0.211026795 | 0.0721266 |
| yjhB | gi 49175990 ref NC_000913.2 | + | 4502081 | 4503298 | 20.18766657 | 31.43306955 | 18.03790267 | 44.20276393 | 18.24533306 | -0.119710273 | 0.008205033 | 0         |
| yjhC | gi 49175990 ref NC_000913.2 | + | 4503310 | 4504428 | 78.13406311 | 80.74080628 | 48.26124131 | 146.8936032 | 74.32555725 | -0.212609437 | 0.20608048  | 0.069361  |
| insI | gi 49175990 ref NC_000913.2 | - | 4505489 | 4506640 | 134.4727751 | 162.4893617 | 123.2025778 | 213.4935204 | 143.7852165 | -0.150208981 | 0.155398942 | 0.0487535 |
| fecE | gi 49175990 ref NC_000913.2 | - | 4508713 | 4509480 | 489.1347546 | 469.1838642 | 139.5014627 | 133.556369  | 160.2120257 | 1.733142987  | 13.94574669 | 11.767196 |
| fecD | gi 49175990 ref NC_000913.2 | - | 4509481 | 4510437 | 428.6180639 | 403.6388251 | 112.5538523 | 161.2584837 | 163.5556698 | 1.504994201  | 10.10650925 | 8.2819247 |
| fecC | gi 49175990 ref NC_000913.2 | - | 4510434 | 4511432 | 605.1380138 | 598.3719841 | 167.1796532 | 223.1361887 | 284.3803764 | 1.402573877  | 8.749891149 | 7.0590548 |
| fecB | gi 49175990 ref NC_000913.2 | - | 4511429 | 4512331 | 849.8782292 | 862.4317512 | 316.2602405 | 348.666254  | 371.1440118 | 1.30128974   | 9.422755153 | 7.6701732 |
| fecA | gi 49175990 ref NC_000913.2 | - | 4512376 | 4514700 | 3408.789542 | 3270.177577 | 1231.630835 | 1443.823458 | 1281.096258 | 1.341172702  | 8.49477123  | 6.8342468 |
| fecR | gi 49175990 ref NC_000913.2 | - | 4514787 | 4515740 | 126.70671   | 131.0828055 | 47.01144296 | 57.15292087 | 62.65234971 | 1.197966567  | 6.33423266  | 4.8975045 |
| fecl | gi 49175990 ref NC_000913.2 | - | 4515737 | 4516258 | 241.611004  | 244.1017527 | 122.6669027 | 121.3282652 | 174.5227397 | 0.789752465  | 3.102189961 | 2.0997306 |
| insA | gi 49175990 ref NC_000913.2 | + | 4516550 | 4516825 | 283.4900879 | 324.8917597 | 361.3531123 | 352.2675647 | 465.1232546 | -0.393782212 | 0.964496578 | 0.4698598 |
| yjhU | gi 49175990 ref NC_000913.2 | - | 4517361 | 4518347 | 898.7359462 | 843.3988897 | 1021.504366 | 1061.604871 | 932.3344662 | -0.196227117 | 0.452950352 | 0.1880174 |
| yjhF | gi 49175990 ref NC_000913.2 | - | 4518694 | 4520043 | 109.9821356 | 128.2790507 | 86.93637195 | 100.9417176 | 119.7449163 | 0.186514246  | 0.433914397 | 0.1772001 |
| yjhG | gi 49175990 ref NC_000913.2 | - | 4520150 | 4522117 | 325.2150244 | 362.872894  | 366.3596582 | 362.2212577 | 401.4484793 | -0.147787075 | 0.2504202   | 0.0911061 |
| yjhH | gi 49175990 ref NC_000913.2 | - | 4522128 | 4523033 | 78.39865975 | 94.0912437  | 85.33170165 | 104.0937525 | 92.02524184 | -0.149373909 | 0.19770009  | 0.0651964 |
| yjhI | gi 49175990 ref NC_000913.2 | - | 4523038 | 4523826 | 12.07617649 | 10.42636026 | 10.87606116 | 15.58777481 | 12.37609656 | -0.19200601  | 0.17735643  | 0.0561337 |
| sgcR | gi 49175990 ref NC_000913.2 | - | 4524129 | 4524911 | 89.10043084 | 83.55696931 | 119.503631  | 117.7818593 | 126.6868359 | -0.483149363 | 1.427406386 | 0.7760559 |
| sgcE | gi 49175990 ref NC_000913.2 | - | 4524928 | 4525560 | 49.42064447 | 59.89172033 | 47.59902355 | 37.21633222 | 50.33719348 | 0.260321538  | 0.499396611 | 0.2127343 |
| sgcA | gi 49175990 ref NC_000913.2 | - | 4525572 | 4526003 | 53.877914   | 63.68479731 | 54.30037096 | 49.41756485 | 53.81900707 | 0.145826319  | 0.263213338 | 0.0969652 |
| sgcQ | gi 49175990 ref NC_000913.2 | - | 4526134 | 4526940 | 576.6725264 | 483.3704667 | 581.7071777 | 683.7722312 | 668.4809477 | -0.265268868 | 0.67812442  | 0.3037385 |
| sgcC | gi 49175990 ref NC_000913.2 | - | 4526953 | 4528266 | 71.24146983 | 72.18566684 | 76.77011784 | 81.67048412 | 60.83146769 | -0.025128906 | 0.027390346 | 0.0014853 |
| sgcB | gi 49175990 ref NC_000913.2 | - | 4528278 | 4528556 | 20.4572712  | 40.04269407 | 43.6128082  | 37.12020396 | 42.59122707 | -0.507102607 | 0.782107569 | 0.3591495 |
| sgcX | gi 49175990 ref NC_000913.2 | - | 4528553 | 4529674 | 99.59597175 | 130.2220339 | 145.9878426 | 136.9108138 | 156.9203287 | -0.38543771  | 0.854172082 | 0.4008068 |
| yjhP | gi 49175990 ref NC_000913.2 | - | 4530460 | 4531206 | 187.0134214 | 170.9254311 | 368.2717843 | 311.828294  | 323.1398601 | -0.881951646 | 3.991107644 | 2.8435912 |
| yjhQ | gi 49175990 ref NC_000913.2 | - | 4531262 | 4531807 | 98.31945224 | 101.6375756 | 166.3118993 | 163.8881712 | 216.1321933 | -0.874450159 | 3.309824667 | 2.688112  |
| yjhX | gi 49175990 ref NC_000913.2 | - | 4531819 | 4532076 | 176.3861775 | 192.8444237 | 254.0924094 | 245.8434175 | 367.3532398 | -0.667339205 | 2.034810421 | 1.2249254 |
| nanS | gi 49175990 ref NC_000913.2 | - | 4534637 | 4535617 | 98.8211285  | 107.3548056 | 88.22551067 | 124.1002431 | 96.58594599 | -0.018109866 | 0           | 0         |
| nanM | gi 49175990 ref NC_000913.2 | - | 4535682 | 4536788 | 71.05586549 | 77.91101888 | 38.24060047 | 76.82545468 | 51.71047912 | 0.390848691  | 0.882317978 | 0.4191516 |

|             |                             |   |         |         |             |             |             |             |             |              |              |           |
|-------------|-----------------------------|---|---------|---------|-------------|-------------|-------------|-------------|-------------|--------------|--------------|-----------|
| <b>nanC</b> | gi 49175990 ref NC_000913.2 | - | 4536808 | 4537524 | 36.97735679 | 41.81936673 | 23.4951494  | 47.8194502  | 34.80807565 | 0.122366409  | 0.201446726  | 0.0672035 |
| <b>fimB</b> | gi 49175990 ref NC_000913.2 | + | 4538980 | 4539582 | 111.9620599 | 126.3667816 | 31.87279374 | 64.76261003 | 64.79469387 | 1.10444583   | 4.635410646  | 3.4111025 |
| <b>fimE</b> | gi 49175990 ref NC_000913.2 | + | 4540060 | 4540656 | 28.97863221 | 42.835778   | 40.38855705 | 40.57871305 | 64.62387097 | -0.485516239 | 0.786996499  | 0.3620573 |
| <b>fimA</b> | gi 49175990 ref NC_000913.2 | + | 4541138 | 4541686 | 349.9498749 | 375.2026552 | 557.9753467 | 586.5419082 | 765.6887283 | -0.831181818 | 3.401864009  | 2.3542425 |
| <b>fimI</b> | gi 49175990 ref NC_000913.2 | + | 4541751 | 4542290 | 97.20303396 | 94.96856339 | 97.79307079 | 142.1019827 | 126.7028935 | -0.357040303 | 0.798382617  | 0.36802   |
| <b>fimC</b> | gi 49175990 ref NC_000913.2 | + | 4542327 | 4543052 | 54.92386369 | 38.84586378 | 48.78375158 | 68.36574845 | 82.6549475  | -0.484365879 | 1.073317621  | 0.5396795 |
| <b>fimD</b> | gi 49175990 ref NC_000913.2 | + | 4543119 | 4545755 | 109.2552994 | 132.0923828 | 147.7056145 | 133.7366393 | 201.4279251 | -0.445172864 | 0.988298737  | 0.484235  |
| <b>fimF</b> | gi 49175990 ref NC_000913.2 | + | 4545765 | 4546295 | 17.80927891 | 15.16800662 | 33.03409682 | 30.30970964 | 30.32530833 | -0.896510354 | 2.085763843  | 1.2661346 |
| <b>fimG</b> | gi 49175990 ref NC_000913.2 | + | 4546308 | 4546811 | 29.13364241 | 26.5706416  | 28.13949625 | 25.96019945 | 38.99755976 | -0.149860713 | 0.195016178  | 0.0639399 |
| <b>fimH</b> | gi 49175990 ref NC_000913.2 | + | 4546831 | 4547733 | 104.3567786 | 93.98974761 | 109.9813182 | 96.58076708 | 112.0868761 | -0.08301383  | 0.153825195  | 0.0483816 |
| <b>gntP</b> | gi 49175990 ref NC_000913.2 | - | 4547976 | 4549319 | 89.79330466 | 105.4833677 | 98.25191529 | 85.44538566 | 114.1680305 | -0.044574657 | 0.027564564  | 0.0014853 |
| <b>uxuA</b> | gi 49175990 ref NC_000913.2 | + | 4549659 | 4550843 | 482.7201085 | 477.7463634 | 700.7596559 | 717.5738377 | 764.9170029 | -0.600895211 | 2.2053742    | 1.3573876 |
| <b>uxuB</b> | gi 49175990 ref NC_000913.2 | + | 4550924 | 4552384 | 465.5174022 | 400.7495799 | 808.6892423 | 713.1162981 | 675.4663998 | -0.728981818 | 3.12247315   | 2.1135316 |
| <b>uxuR</b> | gi 49175990 ref NC_000913.2 | + | 4552599 | 4553372 | 395.1134212 | 378.9519955 | 406.4482549 | 363.1990858 | 289.7864322 | 0.149306012  | 0.253108199  | 0.0923635 |
| <b>yjiC</b> | gi 49175990 ref NC_000913.2 | - | 4553513 | 4554343 | 7.617072802 | 6.63295969  | 2.973194446 | 2.386602636 | 10.91731625 | 0.378728219  | 0.22269706   | 0.0773895 |
| <b>iraD</b> | gi 49175990 ref NC_000913.2 | + | 4555016 | 4555408 | 62.50003842 | 60.77491817 | 141.317891  | 165.9061348 | 181.51152   | -1.406331028 | 7.738103244  | 6.1534947 |
| <b>qseD</b> | gi 49175990 ref NC_000913.2 | - | 4555401 | 4556312 | 198.98216   | 183.2757326 | 176.8888618 | 179.519436  | 219.5825589 | -0.001028913 | 0.003072255  | 0         |
| <b>iadA</b> | gi 49175990 ref NC_000913.2 | - | 4556377 | 4557549 | 323.3545919 | 293.4453838 | 286.6272828 | 275.8985003 | 301.6574898 | 0.111451387  | 0.185357904  | 0.0597433 |
| <b>yjiG</b> | gi 49175990 ref NC_000913.2 | - | 4557562 | 4558023 | 106.6143072 | 106.3737801 | 93.45203955 | 92.17171769 | 134.1577037 | -0.009051798 | 0            | 0         |
| <b>yjiH</b> | gi 49175990 ref NC_000913.2 | - | 4558020 | 4558703 | 26.21231563 | 19.89025744 | 27.3168045  | 12.65588273 | 25.65803448 | 0.11631513   | 0.042449697  | 0.005706  |
| <b>kptA</b> | gi 49175990 ref NC_000913.2 | + | 4558953 | 4559507 | 141.2143873 | 116.7510973 | 145.476562  | 220.3569875 | 158.3542739 | -0.425254993 | 1.055780128  | 0.5279327 |
| <b>yjiJ</b> | gi 49175990 ref NC_000913.2 | - | 4559520 | 4560698 | 131.8243103 | 132.9727075 | 128.0693828 | 186.7504167 | 131.4672652 | -0.17867313  | 0.2938818    | 0.113293  |
| <b>yjiK</b> | gi 49175990 ref NC_000913.2 | - | 4560766 | 4561626 | 108.4637461 | 86.34895799 | 128.2343477 | 83.44299578 | 137.6514003 | -0.222072607 | 0.483221013  | 0.2031111 |
| <b>yjiL</b> | gi 49175990 ref NC_000913.2 | - | 4561945 | 4562712 | 74.4386384  | 70.4793736  | 272.0612933 | 141.7087245 | 142.895609  | -1.285697636 | 5.044076752  | 3.7706221 |
| <b>yjiM</b> | gi 49175990 ref NC_000913.2 | - | 4562722 | 4563873 | 227.1446491 | 226.0488948 | 944.4791434 | 491.597042  | 526.5229007 | -1.494293615 | 7.651032094  | 6.0745414 |
| <b>yjiN</b> | gi 49175990 ref NC_000913.2 | - | 4563989 | 4565269 | 331.3088725 | 324.8226588 | 311.6701209 | 328.3379188 | 272.8042174 | 0.113243043  | 0.203933289  | 0.0682219 |
| <b>mdtM</b> | gi 49175990 ref NC_000913.2 | - | 4565310 | 4566542 | 127.1917087 | 138.7019529 | 202.1599427 | 173.7882558 | 146.1339234 | -0.387618115 | 0.939641797  | 0.4570396 |
| <b>yjiR</b> | gi 49175990 ref NC_000913.2 | - | 4568185 | 4569597 | 127.0771071 | 114.8851518 | 117.3843009 | 92.09802553 | 95.45769613 | 0.274653947  | 0.537344258  | 0.2313891 |
| <b>mcrC</b> | gi 49175990 ref NC_000913.2 | - | 4574935 | 4575981 | 44.24820612 | 41.77195579 | 30.28640749 | 73.2208457  | 35.07990246 | -0.117698557 | 0.091000959  | 0.023835  |
| <b>mcrB</b> | gi 49175990 ref NC_000913.2 | - | 4575981 | 4577360 | 172.2423632 | 212.842363  | 107.8302933 | 213.5947657 | 178.2352807 | 0.15570148   | 0.369733016  | 0.1454249 |
| <b>symE</b> | gi 49175990 ref NC_000913.2 | - | 4577522 | 4577863 | 28.91736036 | 30.4007375  | 31.30165678 | 54.56600707 | 39.34383903 | -0.510683682 | 0.913475544  | 0.4415479 |
| <b>hsdS</b> | gi 49175990 ref NC_000913.2 | - | 4578091 | 4579485 | 178.8275297 | 162.3748106 | 164.0914586 | 251.7173369 | 178.5590027 | -0.215204688 | 0.399512422  | 0.1609792 |
| <b>hsdM</b> | gi 49175990 ref NC_000913.2 | - | 4579482 | 4581071 | 505.1791197 | 447.3023353 | 555.5453815 | 573.8161973 | 437.8325311 | -0.11166835  | 0.253730515  | 0.0923968 |
| <b>hsdR</b> | gi 49175990 ref NC_000913.2 | - | 4581272 | 4584784 | 2289.934202 | 2251.991388 | 3129.238049 | 2881.357082 | 2656.462272 | -0.338351603 | 0.872171905  | 0.4137582 |
| <b>mrr</b>  | gi 49175990 ref NC_000913.2 | + | 4584972 | 4585886 | 410.953223  | 386.5417745 | 490.1762311 | 385.9264962 | 431.8974489 | -0.110849518 | 0.246332906  | 0.0901954 |
| <b>yjiA</b> | gi 49175990 ref NC_000913.2 | - | 4585932 | 4586888 | 1258.35447  | 1199.585355 | 2252.695135 | 1613.617591 | 1661.522499 | -0.56002397  | 1.821539904  | 1.0659315 |
| <b>yjiX</b> | gi 49175990 ref NC_000913.2 | - | 4586899 | 4587102 | 638.6901758 | 611.6545815 | 987.9270059 | 661.7809829 | 646.4688296 | -0.263366264 | 0.663853461  | 0.297721  |
| <b>yjiY</b> | gi 49175990 ref NC_000913.2 | - | 4587152 | 4589302 | 16287.64439 | 15177.95313 | 22910.65991 | 14969.89789 | 15658.58002 | -0.149224772 | 0.321315331  | 0.1253096 |
| <b>tsr</b>  | gi 49175990 ref NC_000913.2 | + | 4589680 | 4591335 | 2078.168875 | 1904.32665  | 4199.332324 | 3344.540569 | 3221.865977 | -0.823832793 | 3.568097784  | 2.4972595 |
| <b>yjiL</b> | gi 49175990 ref NC_000913.2 | - | 4591384 | 4592745 | 615.0606468 | 640.1875138 | 1056.045762 | 1006.884216 | 1077.928538 | -0.743054175 | 3.114059608  | 2.1094502 |
| <b>yjiM</b> | gi 49175990 ref NC_000913.2 | - | 4592960 | 4593874 | 114.3058337 | 137.7908077 | 187.8492659 | 203.0861545 | 267.6518549 | -0.834239936 | 2.873949974  | 1.9121685 |
| <b>yjiN</b> | gi 49175990 ref NC_000913.2 | + | 4594013 | 4595035 | 48.34395658 | 72.30841353 | 66.95305006 | 70.79165616 | 97.21202865 | -0.432474853 | 0.74909462   | 0.3400307 |
| <b>opxB</b> | gi 49175990 ref NC_000913.2 | - | 4595173 | 4597464 | 1483.174718 | 1607.115915 | 842.1368435 | 890.4544751 | 1284.858364 | 0.595344233  | 2.158641553  | 1.3239734 |
| <b>yjiA</b> | gi 49175990 ref NC_000913.2 | - | 4597718 | 4598212 | 310.6682605 | 350.5301681 | 196.3713186 | 282.3821571 | 308.1203872 | 0.298817652  | 0.799403555  | 0.3684661 |
| <b>dnaC</b> | gi 49175990 ref NC_000913.2 | - | 4598261 | 4598998 | 359.2716662 | 331.4445496 | 286.831666  | 304.9225104 | 306.1955532 | 0.214510031  | 0.460867949  | 0.1934841 |
| <b>dnaT</b> | gi 49175990 ref NC_000913.2 | - | 4599001 | 4599540 | 267.962117  | 284.0148304 | 255.15158   | 290.2707999 | 279.2893852 | -0.007386092 | 0.008162709  | 0         |
| <b>yjiB</b> | gi 49175990 ref NC_000913.2 | - | 4599647 | 4600120 | 60.39640874 | 64.6040675  | 69.57778602 | 48.4399025  | 56.1393432  | 0.111523793  | 0.152690678  | 0.0474193 |
| <b>yjiP</b> | gi 49175990 ref NC_000913.2 | - | 4600111 | 4600881 | 137.4503918 | 176.7628735 | 210.7617232 | 186.2763256 | 210.8149607 | -0.396842076 | 0.904540671  | 0.4351343 |
| <b>yjiQ</b> | gi 49175990 ref NC_000913.2 | + | 4601500 | 4602225 | 20.20443108 | 10.35573046 | 7.019674645 | 6.880970246 | 16.51749777 | 0.631042947  | 0.676496211  | 0.3033725 |
| <b>bgjJ</b> | gi 49175990 ref NC_000913.2 | + | 4602183 | 4602860 | 128.9189793 | 93.91415538 | 82.77383513 | 88.66383003 | 108.5430847 | 0.287295221  | 0.520343163  | 0.2226061 |
| <b>fhuF</b> | gi 49175990 ref NC_000913.2 | - | 4602898 | 4603686 | 513.975591  | 555.6716855 | 178.3336524 | 152.9172956 | 264.0567535 | 1.4111757892 | 0.8642475332 | 6.9670594 |
| <b>yjiZ</b> | gi 49175990 ref NC_000913.2 | + | 4603827 | 4604063 | 307.6414036 | 333.4153799 | 179.7134268 | 219.5844887 | 207.4807945 | 0.645029201  | 2.515141627  | 1.6178769 |
| <b>rsmC</b> | gi 49175990 ref NC_000913.2 | - | 4604692 | 4605723 | 632.0424269 | 668.6895388 | 443.8825985 | 476.6317905 | 604.1980081 | 0.338246857  | 0.952601582  | 0.4645752 |
| <b>holD</b> | gi 49175990 ref NC_000913.2 | + | 4605826 | 4606239 | 681.1077116 | 739.9379739 | 462.4155932 | 492.3277379 | 619.9192579 | 0.416204167  | 1.301171894  | 0.694718  |
| <b>rimI</b> | gi 49175990 ref NC_000913.2 | + | 4606208 | 4606654 | 501.8343525 | 470.1229849 | 289.8634048 | 326.2602943 | 360.9765429 | 0.57828668   | 2.092737756  | 1.2724026 |
| <b>yjiG</b> | gi 49175990 ref NC_000913.2 | + | 4606669 | 4607346 | 648.4683569 | 681.9841355 | 496.4613395 | 522.4429764 | 533.8860432 | 0.351812453  | 1.030508747  | 0.5157637 |
| <b>prfC</b> | gi 49175990 ref NC_000913.2 | + | 4607437 | 4609026 | 1508.749234 | 1485.493936 | 1071.085952 | 1084.276807 | 1279.634025 | 0.384129989  | 1.119285351  | 0.5685556 |

|             |                             |   |         |         |             |             |             |             |             |              |             |           |
|-------------|-----------------------------|---|---------|---------|-------------|-------------|-------------|-------------|-------------|--------------|-------------|-----------|
| <b>osmY</b> | gi 49175990 ref NC_000913.2 | + | 4609419 | 4610024 | 1803.015594 | 1668.778162 | 1058.728126 | 1266.431511 | 838.3963746 | 0.730403129  | 2.778815815 | 1.8336062 |
| <b>ytjA</b> | gi 49175990 ref NC_000913.2 | + | 4610151 | 4610312 | 766.6757311 | 757.9401987 | 722.7152126 | 682.7794314 | 636.1777022 | 0.170053765  | 0.360242252 | 0.1424431 |
| <b>yjjU</b> | gi 49175990 ref NC_000913.2 | + | 4610434 | 4611507 | 161.7604639 | 148.1316111 | 234.5535493 | 199.3639605 | 107.290932  | -0.186398397 | 0.355853423 | 0.1411458 |
| <b>yjjV</b> | gi 49175990 ref NC_000913.2 | + | 4611504 | 4612283 | 125.2348608 | 111.0790988 | 240.408246  | 205.1330988 | 156.3476913 | -0.733630172 | 2.533190942 | 1.6315256 |
| <b>yjjW</b> | gi 49175990 ref NC_000913.2 | - | 4612703 | 4613566 | 762.34867   | 734.1827217 | 2141.422146 | 1773.680371 | 1453.076926 | -1.23704565  | 6.783098101 | 5.2937576 |
| <b>yjJI</b> | gi 49175990 ref NC_000913.2 | - | 4613538 | 4615088 | 1968.030151 | 1987.006577 | 5154.868297 | 4658.325352 | 3932.013344 | -1.203744506 | 6.541704408 | 5.0748048 |
| <b>deoC</b> | gi 49175990 ref NC_000913.2 | + | 4615346 | 4616125 | 1227.123548 | 1068.469147 | 2623.761744 | 2526.9695   | 2120.373327 | -1.052195831 | 5.035897054 | 3.7664268 |
| <b>deoA</b> | gi 49175990 ref NC_000913.2 | + | 4616252 | 4617574 | 2614.102191 | 2258.578584 | 5610.938943 | 4884.784242 | 3844.636899 | -0.937769207 | 4.194345411 | 3.0269108 |
| <b>deoB</b> | gi 49175990 ref NC_000913.2 | + | 4617626 | 4618849 | 4057.274426 | 4099.388285 | 6432.423218 | 4990.494272 | 5549.273404 | -0.462872489 | 1.349362518 | 0.7302308 |
| <b>deoD</b> | gi 49175990 ref NC_000913.2 | + | 4618906 | 4619625 | 5638.408975 | 5952.492468 | 8253.619889 | 6562.543803 | 10126.49284 | -0.529039739 | 1.42304976  | 0.7750308 |
| <b>yjjJ</b> | gi 49175990 ref NC_000913.2 | + | 4619792 | 4621123 | 521.5678208 | 560.4179081 | 505.8732024 | 562.729076  | 549.6181687 | -0.010513444 | 0.008543466 | 0         |
| <b>lplA</b> | gi 49175990 ref NC_000913.2 | - | 4621124 | 4622140 | 393.7506203 | 389.4136159 | 368.1125643 | 291.7246654 | 318.6302529 | 0.274927775  | 0.641984271 | 0.286746  |
| <b>ytjB</b> | gi 49175990 ref NC_000913.2 | - | 4622168 | 4622812 | 184.3735927 | 216.6206768 | 214.3303016 | 190.616293  | 170.7247572 | 0.050227862  | 0.101079428 | 0.0266333 |
| <b>serB</b> | gi 49175990 ref NC_000913.2 | + | 4622918 | 4623886 | 421.4025102 | 431.2207337 | 353.4169276 | 288.2766206 | 282.856203  | 0.475792627  | 1.484707667 | 0.8131626 |
| <b>radA</b> | gi 49175990 ref NC_000913.2 | + | 4623935 | 4625317 | 573.2397164 | 521.3992394 | 492.8296088 | 400.442429  | 421.8628645 | 0.342863347  | 0.875234123 | 0.4151544 |
| <b>nadR</b> | gi 49175990 ref NC_000913.2 | + | 4625338 | 4626570 | 667.8218155 | 620.1887485 | 609.6076791 | 571.6858185 | 454.6684245 | 0.259342361  | 0.549789578 | 0.2376357 |
| <b>yjjK</b> | gi 49175990 ref NC_000913.2 | - | 4626878 | 4628545 | 2845.285741 | 2743.98444  | 1885.484648 | 1825.371644 | 2117.631676 | 0.527455258  | 1.676380433 | 0.9624408 |
| <b>slt</b>  | gi 49175990 ref NC_000913.2 | + | 4628756 | 4630693 | 1076.314543 | 936.4452396 | 961.6790763 | 923.8431282 | 898.5908634 | 0.139444308  | 0.231727919 | 0.0820292 |
| <b>trpR</b> | gi 49175990 ref NC_000913.2 | + | 4630783 | 4631109 | 253.2538912 | 285.9421073 | 174.5060315 | 194.0361328 | 234.1185385 | 0.398376064  | 1.173378801 | 0.6044621 |
| <b>yjjX</b> | gi 49175990 ref NC_000913.2 | - | 4631256 | 4631768 | 337.9401263 | 364.7576443 | 281.5315408 | 264.8043744 | 336.2255086 | 0.242498977  | 0.602773628 | 0.2674799 |
| <b>ytjC</b> | gi 49175990 ref NC_000913.2 | + | 4631820 | 4632467 | 627.5351836 | 681.9995234 | 650.5947742 | 758.8587095 | 711.1761747 | -0.12827823  | 0.211158571 | 0.0721266 |
| <b>rob</b>  | gi 49175990 ref NC_000913.2 | - | 4632464 | 4633333 | 2539.543729 | 2693.690495 | 3429.568337 | 3482.2336   | 3313.677561 | -0.38945788  | 1.069889382 | 0.5369793 |
| <b>creA</b> | gi 49175990 ref NC_000913.2 | + | 4633544 | 4634017 | 190.5256453 | 190.9087261 | 153.9802062 | 164.707673  | 148.1686223 | 0.292517973  | 0.683238648 | 0.3060663 |
| <b>creB</b> | gi 49175990 ref NC_000913.2 | + | 4634030 | 4634719 | 238.5522558 | 233.6405993 | 211.1252314 | 166.0133323 | 141.6829532 | 0.467601948  | 1.20443418  | 0.6233323 |
| <b>creC</b> | gi 49175990 ref NC_000913.2 | + | 4634719 | 4636143 | 270.8770316 | 253.567194  | 221.3266825 | 223.0032773 | 188.6680123 | 0.326090122  | 0.779162344 | 0.3573323 |
| <b>creD</b> | gi 49175990 ref NC_000913.2 | + | 4636201 | 4637553 | 77.44840459 | 62.61590918 | 74.0627184  | 68.42350806 | 66.26235545 | 0.03908007   | 0.000801746 | 0         |
| <b>arcA</b> | gi 49175990 ref NC_000913.2 | - | 4637613 | 4638329 | 4171.179454 | 3849.544118 | 4107.847723 | 4060.925507 | 4741.336618 | -0.093679854 | 0.179410265 | 0.0569389 |
| <b>yjjY</b> | gi 49175990 ref NC_000913.2 | + | 4638425 | 4638565 | 1753.941832 | 1863.555684 | 1932.716812 | 2132.597657 | 2847.523232 | -0.370491432 | 0.808293151 | 0.3721476 |
| <b>yjID</b> | gi 49175990 ref NC_000913.2 | + | 4638965 | 4639651 | 93.13258096 | 60.6485134  | 78.8846816  | 119.44613   | 75.44421561 | -0.205731418 | 0.418229974 | 0.1710597 |
