# Supplementary material
Source: PubMed Central journal article supplement (PMC3879109)
Supplement: NIHMS504424-supplement-Supplementary_Table_8.pdf [file NIHMS504424-supplement-Supplementary_Table_8.pdf]

**Supplementary Table 8.** Genes from supplementary table 4 ordered in the way in which they occur in the heatmap in Figure 4b of the main text.

| gene name | protein name                           | reference name     | strand | start   | posit end | positi | log2 fold change | log10 p va | log10 FDR | GO category      |
|-----------|----------------------------------------|--------------------|--------|---------|-----------|--------|------------------|------------|-----------|------------------|
| B7LAF3    | Zinc transporter zitB                  | TY-2482_chromosome | -      | 4835917 | 4836855   |        | 0.814486864      | 3.979247   | 3.440146  | cation transport |
| B7LGV1    | Cell volume regulation protein A       | TY-2482_chromosome | -      | 193056  | 194789    |        | 0.554238762      | 1.959795   | 1.636108  | cation transport |
| B7L4D2    | Putative amino acid sodium/proton tr   | TY-2482_chromosome | -      | 4039829 | 4041256   |        | 2.820626583      | 33.22098   | 31.65854  | cation transport |
| B7L5A9    | Zinc transport protein ZntB            | TY-2482_chromosome | +      | 404256  | 405236    |        | 1.511125957      | 11.72214   | 10.71113  | cation transport |
| B7LGF1    | Membrane spanning protein in TonB-     | TY-2482_chromosome | -      | 2407715 | 2408137   |        | 4.59549753       | 86.8374    | 84.17806  | cation transport |
| B7LGF2    | Membrane spanning protein in TonB-     | TY-2482_chromosome | -      | 2408147 | 2408878   |        | 5.284353313      | 35.21642   | 33.5905   | cation transport |
| B7L8H2    | Iron-enterobactin transporter subunit  | TY-2482_chromosome | -      | 4677918 | 4678907   |        | 2.844657615      | 34.07679   | 32.493    | cation transport |
| B7L4T5    | Ferrous iron transporter, protein A    | TY-2482_chromosome | +      | 2779978 | 2780202   |        | 5.889806738      | 105.0159   | 102.0555  | cation transport |
| B7LHJ8    | Membrane spanning protein in TonB-     | TY-2482_chromosome | +      | 262619  | 263335    |        | 2.981596985      | 40.82219   | 39.07666  | cation transport |
| B7L4T8    | Fused ferrous iron transporter, protei | TY-2482_chromosome | +      | 2780222 | 2782588   |        | 4.566232615      | 24.04906   | 22.65923  | cation transport |
| B7L5T0    | Nickel transporter subunit ; membran   | TY-2482_chromosome | +      | 2857443 | 2858384   |        | 3.64134235       | 52.15683   | 50.22988  | cation transport |
| B7L5T1    | Nickel transporter subunit ; membran   | TY-2482_chromosome | +      | 2858384 | 2859214   |        | 3.327973735      | 45.43137   | 43.63534  | cation transport |
| B7L8G9    | Enterobactin synthase multienzyme c    | TY-2482_chromosome | +      | 4671876 | 4675754   |        | 2.124103979      | 21.3749    | 20.05995  | cation transport |
| B7LB16    | Cation/acetate symporter ActP (Acetε   | TY-2482_chromosome | -      | 3626533 | 3628179   |        | 2.070639216      | 20.83963   | 19.53247  | cation transport |
| B7LDV1    | Iron-dictrate transporter subunit ; mε | TY-2482_chromosome | -      | 3928372 | 3929325   |        | 1.538456665      | 11.60835   | 10.6051   | cation transport |
| B7L777    | Glutamate transporter                  | TY-2482_chromosome | -      | 3105621 | 3106823   |        | 1.195496573      | 7.264436   | 6.494393  | cation transport |
| B7LDV0    | Iron-dictrate transporter subunit ; mε | TY-2482_chromosome | -      | 3929325 | 3930320   |        | 1.462840926      | 11.89804   | 10.87918  | cation transport |
| B7LGL3    | Iron-hydroxamate transporter subuni    | TY-2482_chromosome | +      | 4203164 | 4203958   |        | 1.430708399      | 10.35728   | 9.411429  | cation transport |
| B7LDV3    | Iron-dictrate transporter subunit ; pe | TY-2482_chromosome | -      | 3930320 | 3931219   |        | 1.306133709      | 8.701265   | 7.838493  | cation transport |
| B7LFC5    | Proline:sodium symporter               | TY-2482_chromosome | +      | 5239604 | 5241109   |        | 2.005055336      | 17.10172   | 15.89262  | cation transport |
| B7L8H6    | Isochorismate synthase 1 (EC 5.4.4.2)  | TY-2482_chromosome | +      | 4682604 | 4683776   |        | 1.732981479      | 8.875723   | 8.003838  | cation transport |
| B7L8H8    | Isochorismatase (EC 3.3.2.1)           | TY-2482_chromosome | +      | 4685413 | 4686267   |        | 1.858563176      | 11.27069   | 10.28159  | cation transport |
| B7L7A3    | Putative monovalent cation:proton ar   | TY-2482_chromosome | -      | 4569111 | 4570784   |        | 0.622033444      | 2.425104   | 2.0502    | cation transport |
| B7LDV4    | Ferric citrate outer membrane transp   | TY-2482_chromosome | -      | 3931267 | 3933588   |        | 0.968853273      | 1.922843   | 1.603942  | cation transport |
| B7L668    | Cytochrome o ubiquinol oxidase subu    | TY-2482_chromosome | -      | 4516200 | 4518188   |        | 0.780237208      | 1.166009   | 0.947729  | cation transport |
| B7LDU9    | Iron-dictrate transporter subunit ; AT | TY-2482_chromosome | -      | 3927604 | 3928368   |        | 1.929944586      | 14.64244   | 13.51712  | cation transport |
| B7LHJ6    | Voltage-gated potassium channel        | TY-2482_chromosome | -      | 260549  | 261799    |        | 1.20031033       | 7.225938   | 6.459243  | cation transport |
| B7L8G6    | Iron-enterobactin outer membrane tr    | TY-2482_chromosome | -      | 4667976 | 4670213   |        | 1.208983995      | 7.575767   | 6.78741   | cation transport |
| B7LGI2    | Zinc transporter ZupT                  | TY-2482_chromosome | +      | 2437213 | 2437983   |        | 0.941848202      | 5.944562   | 5.255098  | cation transport |
| B7L9X6    | Putative uncharacterized protein yohI  | TY-2482_chromosome | -      | 1335586 | 1335855   |        | 1.19375681       | 6.505583   | 5.781745  | cation transport |
| B7LCE3    | Manganese transport protein mntH       | TY-2482_chromosome | -      | 1667945 | 1669180   |        | 0.895279526      | 4.473164   | 3.895885  | cation transport |
| B7LB62    | Melibiose:sodium symporter             | TY-2482_chromosome | +      | 3679115 | 3680521   |        | 0.452598794      | 1.831651   | 1.525259  | cation transport |
| B7L7A9    | Copper transporter (EC 3.6.3.4)        | TY-2482_chromosome | -      | 4576222 | 4578723   |        | 0.368677901      | 1.139836   | 0.923753  | cation transport |
| B7L8H7    | 2,3-dihydroxybenzoate-AMP ligase cc    | TY-2482_chromosome | +      | 4683789 | 4685396   |        | 1.375699176      | 9.964621   | 9.03444   | cation transport |
| B7LC88    | Putative TonB-dependent iron outer r   | TY-2482_chromosome | -      | 4936966 | 4939245   |        | 0.884159179      | 5.316768   | 4.670681  | cation transport |
| B7LAH7    | Ferric iron-catecholate outer membra   | TY-2482_chromosome | -      | 1395728 | 1397716   |        | 0.953269991      | 6.076171   | 5.379668  | cation transport |
| B7LBU7    | L-lysine 6-monooxygenase (Lysine N(ε   | TY-2482_chromosome | +      | 3722992 | 3724326   |        | 1.390584492      | 10.76678   | 9.802915  | cation transport |

|        |                                          |                    |   |         |         |              |          |          |                  |
|--------|------------------------------------------|--------------------|---|---------|---------|--------------|----------|----------|------------------|
| B7L8H9 | 2,3-dihydro-2,3-dihydroxybenzoate d      | TY-2482_chromosome | + | 4686270 | 4687013 | 1.40645997   | 10.55797 | 9.600193 | cation transport |
| B7LDV2 | RNA polymerase sigma factor              | TY-2482_chromosome | - | 3934628 | 3935146 | 2.309260556  | 25.46949 | 24.05566 | cation transport |
| B7L8H5 | Iron-enterobactin transporter subunit    | TY-2482_chromosome | - | 4681276 | 4682229 | 2.070353499  | 20.46609 | 19.16658 | cation transport |
| B7LD40 | Putative transport protein YbjL          | TY-2482_chromosome | - | 4986993 | 4988675 | 0.476528814  | 1.742071 | 1.449335 | cation transport |
| B7LGL2 | Ferrichrome outer membrane transp        | TY-2482_chromosome | + | 4200870 | 4203110 | 2.726899864  | 35.27404 | 33.64407 | cation transport |
| B7L8H3 | Iron-enterobactin transporter subunit    | TY-2482_chromosome | - | 4678907 | 4679908 | 3.497938547  | 48.49455 | 46.62759 | cation transport |
| B7L8H1 | Iron-enterobactin transporter subunit    | TY-2482_chromosome | - | 4677106 | 4677918 | 3.021668433  | 37.45251 | 35.77544 | cation transport |
| B7LGL4 | Iron-hydroxamate transporter subuni      | TY-2482_chromosome | + | 4203961 | 4204848 | 1.619578486  | 15.3084  | 14.15825 | cation transport |
| B7L5T2 | Nickel transporter subunit ; ATP-bindi   | TY-2482_chromosome | + | 2859217 | 2859978 | 3.253948477  | 44.15301 | 42.36289 | cation transport |
| B7L5S9 | Nickel transporter subunit ; ATP-bindi   | TY-2482_chromosome | + | 2859978 | 2860781 | 2.032926956  | 21.39717 | 20.08025 | cation transport |
| B7LB10 | Putative cation/proton antiporter        | TY-2482_chromosome | + | 3623257 | 3624903 | 1.404460152  | 8.366676 | 7.519575 | cation transport |
| B7L4L4 | Bacterioferritin-associated ferredoxin   | TY-2482_chromosome | - | 2708808 | 2708999 | 2.047038836  | 18.37301 | 17.1303  | cation transport |
| B7LGL5 | Fused iron-hydroxamate transporter ;     | TY-2482_chromosome | + | 4204848 | 4206827 | 1.533774158  | 13.37632 | 12.29216 | cation transport |
| B7LDV5 | Transmembrane signal transducer for      | TY-2482_chromosome | - | 3933678 | 3934628 | 1.895532808  | 19.20956 | 17.94467 | cation transport |
| B7L8G7 | Enterobactin/ferric enterobactin este    | TY-2482_chromosome | + | 4670534 | 4671655 | 2.217391716  | 21.54421 | 20.22132 | cation transport |
| B7LBE6 | Putative transporter                     | TY-2482_chromosome | - | 1543816 | 1545645 | 3.366687231  | 50.88799 | 48.97683 | cation transport |
| B7L824 | Putative transport protein YidE          | TY-2482_chromosome | - | 3190861 | 3192519 | -0.168395258 | 0.355784 | 0.268729 | cation transport |
| B7L7R2 | Zinc transporter subunit: membrane c     | TY-2482_chromosome | + | 1001550 | 1002332 | -0.320204625 | 0.984967 | 0.789813 | cation transport |
| B7L7V6 | Ferritin iron storage protein (Cytoplas  | TY-2482_chromosome | + | 1094424 | 1094918 | -1.75646244  | 5.185944 | 4.549439 | cation transport |
| B7L888 | ATP synthase subunit a (ATP synthase     | TY-2482_chromosome | - | 3252618 | 3253430 | -0.32047901  | 0.45948  | 0.350852 | cation transport |
| B7LGX9 | Calcium/sodium:proton antiporter         | TY-2482_chromosome | - | 224007  | 225104  | -0.547417441 | 2.607883 | 2.212883 | cation transport |
| B7L8V3 | Flagellum-specific ATP synthase (EC 3    | TY-2482_chromosome | + | 1122341 | 1123711 | -2.019365399 | 19.09969 | 17.84001 | cation transport |
| B7LHW2 | Pantothenate:sodium symporter            | TY-2482_chromosome | + | 2661833 | 2663281 | -0.756227588 | 3.656702 | 3.145032 | cation transport |
| B7L8C4 | Transcription termination factor Rho     | TY-2482_chromosome | + | 3297889 | 3299145 | -1.65783242  | 4.783639 | 4.176217 | cation transport |
| B7LHY9 | NAD-binding component of TrK potas       | TY-2482_chromosome | + | 2690661 | 2692034 | -1.204312547 | 8.590025 | 7.732332 | cation transport |
| B7L6I3 | Glutathione peroxidase                   | TY-2482_chromosome | - | 810856  | 811404  | -0.472003802 | 1.958205 | 1.634718 | cation transport |
| B7L972 | Magnesium/nickel/cobalt transporter      | TY-2482_chromosome | + | 3335016 | 3335963 | -0.929578923 | 5.872159 | 5.186864 | cation transport |
| B7LCV2 | Magnesium transporter (EC 3.6.3.1)       | TY-2482_chromosome | + | 3853696 | 3856389 | -1.471791003 | 12.94592 | 11.87653 | cation transport |
| B7LGE1 | Aldo-keto reductase                      | TY-2482_chromosome | + | 2405024 | 2406061 | -1.789980009 | 15.76125 | 14.59045 | cation transport |
| B7L7P3 | Putative uncharacterized protein yeb;    | TY-2482_chromosome | - | 981858  | 982727  | -0.367268822 | 0.838026 | 0.666243 | cation transport |
| B7L7R0 | Zinc transporter subunit: periplasmic-   | TY-2482_chromosome | - | 999790  | 1000719 | -0.74787641  | 3.939952 | 3.404458 | cation transport |
| B7L524 | Putative flagellin structural protein; p | TY-2482_chromosome | + | 4456981 | 4459866 | 1.296863632  | 9.063902 | 8.183431 | cell projection  |
| B7LHG1 | Flagellar system protein                 | TY-2482_chromosome | - | 4312906 | 4314642 | 0.775946355  | 3.138266 | 2.68059  | cell projection  |
| B7L7T3 | Flagellar export pore protein            | TY-2482_chromosome | - | 1071530 | 1072675 | -1.644100213 | 12.6421  | 11.58913 | cell projection  |
| B7L8W2 | Flagellar biosynthetic protein fliR      | TY-2482_chromosome | + | 1128681 | 1129463 | -1.608325282 | 7.775404 | 6.972788 | cell projection  |
| B7L8T6 | Flagellin                                | TY-2482_chromosome | - | 1107663 | 1107950 | -0.540299587 | 0.983264 | 0.788495 | cell projection  |
| B7L8T6 | Flagellin                                | TY-2482_chromosome | - | 1107926 | 1108675 | -0.788604848 | 1.493723 | 1.230228 | cell projection  |
| B7L8T6 | Flagellin                                | TY-2482_chromosome | - | 1107663 | 1107950 | -0.540299587 | 0.983264 | 0.788495 | cell projection  |
| B7L8T6 | Flagellin                                | TY-2482_chromosome | - | 1107926 | 1108675 | -0.788604848 | 1.493723 | 1.230228 | cell projection  |
| B7L8V5 | Flagellar hook-length control protein    | TY-2482_chromosome | + | 1124173 | 1125297 | -2.22864103  | 20.49116 | 19.18975 | cell projection  |

|        |                                          |                    |   |         |         |              |          |          |                          |
|--------|------------------------------------------|--------------------|---|---------|---------|--------------|----------|----------|--------------------------|
| B7L8T6 | Flagellin                                | TY-2482_chromosome | - | 1107663 | 1107950 | -0.540299587 | 0.983264 | 0.788495 | cell projection          |
| B7L8T6 | Flagellin                                | TY-2482_chromosome | - | 1107926 | 1108675 | -0.788604848 | 1.493723 | 1.230228 | cell projection          |
| B7L8T6 | Flagellin                                | TY-2482_chromosome | - | 1107663 | 1107950 | -0.540299587 | 0.983264 | 0.788495 | cell projection          |
| B7L8T6 | Flagellin                                | TY-2482_chromosome | - | 1107926 | 1108675 | -0.788604848 | 1.493723 | 1.230228 | cell projection          |
| B7L8T7 | Putative Flagellar hook-associated prc   | TY-2482_chromosome | + | 1108923 | 1110335 | -0.913291902 | 5.060592 | 4.433059 | cell projection          |
| B7LG16 | Flagellar hook-filament junction prote   | TY-2482_chromosome | + | 106176  | 107816  | -1.051375038 | 6.646817 | 5.911234 | cell projection          |
| B7LG10 | Flagellar hook protein                   | TY-2482_chromosome | + | 100375  | 101577  | -2.842122089 | 33.76889 | 32.19591 | cell projection          |
| B7LG11 | Flagellar component of cell-proximal     | TY-2482_chromosome | + | 101600  | 102352  | -2.85605793  | 34.85303 | 33.23111 | cell projection          |
| B7LG08 | Flagellar component of cell-proximal     | TY-2482_chromosome | + | 99239   | 99640   | -2.412738353 | 26.97364 | 25.5396  | cell projection          |
| B7LG12 | Flagellar component of cell-distal por   | TY-2482_chromosome | + | 102527  | 103306  | -3.198591603 | 40.81442 | 39.07415 | cell projection          |
| B7LG17 | Flagellar hook-filament junction prote   | TY-2482_chromosome | + | 107831  | 108781  | -1.216986275 | 9.689261 | 8.778104 | cell projection          |
| B7L8V4 | Flagellar protein                        | TY-2482_chromosome | + | 1123733 | 1124173 | -2.362341742 | 19.41986 | 18.14968 | cell projection          |
| B7L8V1 | Flagellar motor switching and energiz    | TY-2482_chromosome | + | 1120667 | 1121659 | -1.501752902 | 12.14062 | 11.10966 | cell projection          |
| B7LGV4 | Flagellar brake protein YcgR (Cyclic di  | TY-2482_chromosome | - | 196514  | 197245  | -0.905261309 | 5.443705 | 4.788681 | cell projection          |
| B7L7T2 | Putative flagellar export pore protein   | TY-2482_chromosome | - | 1069459 | 1071534 | -1.721121873 | 16.15249 | 14.97315 | cell projection          |
| B7L8V8 | Flagellar motor switching and energiz    | TY-2482_chromosome | + | 1126875 | 1127285 | -2.462972409 | 27.41076 | 25.97152 | cell projection          |
| B7L8V9 | Flagellar biosynthesis protein           | TY-2482_chromosome | + | 1127291 | 1127653 | -2.257649185 | 24.29088 | 22.89635 | cell projection          |
| B7L8W0 | Flagellar biosynthesis protein           | TY-2482_chromosome | + | 1127656 | 1128390 | -2.209597051 | 21.44937 | 20.12848 | cell projection          |
| B7L8V6 | Flagellar biosynthesis protein           | TY-2482_chromosome | + | 1125405 | 1125866 | -2.167864853 | 21.26301 | 19.95002 | cell projection          |
| B7L8V0 | Flagellar basal-body MS-ring and colla   | TY-2482_chromosome | + | 1119016 | 1120671 | -1.722798175 | 16.07035 | 14.89245 | cell projection          |
| B7L8T8 | Flagellar protein potentiates polymer    | TY-2482_chromosome | + | 1110354 | 1110761 | -1.315322089 | 10.16834 | 9.233269 | cell projection          |
| B7L8V7 | Flagellar motor switching and energiz    | TY-2482_chromosome | + | 1125874 | 1126875 | -2.369755704 | 26.18246 | 24.76116 | cell projection          |
| B7LBH5 | Flagella control of anti-sigma factor FI | TY-2482_chromosome | + | 1572303 | 1573295 | -1.016244854 | 6.574302 | 5.844886 | cell projection          |
| B7LG07 | Flagellar component of cell-proximal     | TY-2482_chromosome | + | 98819   | 99232   | -2.084601069 | 22.18933 | 20.85632 | cell projection          |
| B7LG09 | Flagellar hook assembly protein          | TY-2482_chromosome | + | 99655   | 100347  | -2.660640458 | 36.45637 | 34.80562 | cell projection          |
| B7L609 | EAL domain containing protein involv     | TY-2482_chromosome | - | 2947401 | 2948165 | -0.573835882 | 2.245371 | 1.889437 | cell projection          |
| B7L8W1 | Flagellar biosynthesis protein           | TY-2482_chromosome | + | 1128403 | 1128669 | -2.452854472 | 12.94898 | 11.8781  | cell projection          |
| B7LG06 | Assembly protein for flagellar basal-b   | TY-2482_chromosome | - | 98008   | 98664   | -1.121578941 | 6.353191 | 5.63734  | cell projection          |
| B7L7U2 | Protein that enables flagellar motor r   | TY-2482_chromosome | - | 1081816 | 1082739 | -0.224343206 | 0.561521 | 0.434802 | cell projection          |
| B7L8V2 | Flagellar biosynthesis protein           | TY-2482_chromosome | + | 1121655 | 1122338 | -1.475435517 | 10.39348 | 9.446782 | cell projection          |
| B7L6W8 | Putative outer membrane lipoprotien      | TY-2482_chromosome | + | 2992342 | 2992998 | 0.922439057  | 5.230059 | 4.588581 | ciliary or flagellar mot |
| B7L8V2 | Flagellar biosynthesis protein           | TY-2482_chromosome | + | 1121655 | 1122338 | -1.475435517 | 10.39348 | 9.446782 | ciliary or flagellar mot |
| B7LG06 | Assembly protein for flagellar basal-b   | TY-2482_chromosome | - | 98008   | 98664   | -1.121578941 | 6.353191 | 5.63734  | ciliary or flagellar mot |
| B7LG13 | Flagellar L-ring protein (Basal body L-  | TY-2482_chromosome | + | 103362  | 104057  | -3.134687783 | 33.48293 | 31.91701 | ciliary or flagellar mot |
| B7LG12 | Flagellar component of cell-distal por   | TY-2482_chromosome | + | 102527  | 103306  | -3.198591603 | 40.81442 | 39.07415 | ciliary or flagellar mot |
| B7LG17 | Flagellar hook-filament junction prote   | TY-2482_chromosome | + | 107831  | 108781  | -1.216986275 | 9.689261 | 8.778104 | ciliary or flagellar mot |
| B7L8V1 | Flagellar motor switching and energiz    | TY-2482_chromosome | + | 1120667 | 1121659 | -1.501752902 | 12.14062 | 11.10966 | ciliary or flagellar mot |
| B7LG08 | Flagellar component of cell-proximal     | TY-2482_chromosome | + | 99239   | 99640   | -2.412738353 | 26.97364 | 25.5396  | ciliary or flagellar mot |
| B7LG14 | Flagellar P-ring protein (Basal body P-  | TY-2482_chromosome | + | 104072  | 105166  | -3.046349046 | 37.74141 | 36.0552  | ciliary or flagellar mot |
| B7L8V8 | Flagellar motor switching and energiz    | TY-2482_chromosome | + | 1126875 | 1127285 | -2.462972409 | 27.41076 | 25.97152 | ciliary or flagellar mot |

|        |                                          |                    |   |         |         |              |          |          |                          |
|--------|------------------------------------------|--------------------|---|---------|---------|--------------|----------|----------|--------------------------|
| B7L8V0 | Flagellar basal-body MS-ring and colla   | TY-2482_chromosome | + | 1119016 | 1120671 | -1.722798175 | 16.07035 | 14.89245 | ciliary or flagellar mot |
| B7L8V7 | Flagellar motor switching and energiz    | TY-2482_chromosome | + | 1125874 | 1126875 | -2.369755704 | 26.18246 | 24.76116 | ciliary or flagellar mot |
| B7L8V6 | Flagellar biosynthesis protein           | TY-2482_chromosome | + | 1125405 | 1125866 | -2.167864853 | 21.26301 | 19.95002 | ciliary or flagellar mot |
| B7LG07 | Flagellar component of cell-proximal     | TY-2482_chromosome | + | 98819   | 99232   | -2.084601069 | 22.18933 | 20.85632 | ciliary or flagellar mot |
| B7LG15 | Muramidase                               | TY-2482_chromosome | + | 105169  | 106107  | -2.870174707 | 36.5643  | 34.90496 | ciliary or flagellar mot |
| B7L8V4 | Flagellar protein                        | TY-2482_chromosome | + | 1123733 | 1124173 | -2.362341742 | 19.41986 | 18.14968 | ciliary or flagellar mot |
| B7LG16 | Flagellar hook-filament junction prote   | TY-2482_chromosome | + | 106176  | 107816  | -1.051375038 | 6.646817 | 5.911234 | ciliary or flagellar mot |
| B7LG10 | Flagellar hook protein                   | TY-2482_chromosome | + | 100375  | 101577  | -2.842122089 | 33.76889 | 32.19591 | ciliary or flagellar mot |
| B7LG11 | Flagellar component of cell-proximal     | TY-2482_chromosome | + | 101600  | 102352  | -2.85605793  | 34.85303 | 33.23111 | ciliary or flagellar mot |
| B7L8T6 | Flagellin                                | TY-2482_chromosome | - | 1107663 | 1107950 | -0.540299587 | 0.983264 | 0.788495 | ciliary or flagellar mot |
| B7L8T6 | Flagellin                                | TY-2482_chromosome | - | 1107926 | 1108675 | -0.788604848 | 1.493723 | 1.230228 | ciliary or flagellar mot |
| B7L8T6 | Flagellin                                | TY-2482_chromosome | - | 1107663 | 1107950 | -0.540299587 | 0.983264 | 0.788495 | ciliary or flagellar mot |
| B7L8T6 | Flagellin                                | TY-2482_chromosome | - | 1107926 | 1108675 | -0.788604848 | 1.493723 | 1.230228 | ciliary or flagellar mot |
| B7L8T6 | Flagellin                                | TY-2482_chromosome | - | 1107663 | 1107950 | -0.540299587 | 0.983264 | 0.788495 | ciliary or flagellar mot |
| B7L8T6 | Flagellin                                | TY-2482_chromosome | - | 1107926 | 1108675 | -0.788604848 | 1.493723 | 1.230228 | ciliary or flagellar mot |
| B7L8T6 | Flagellin                                | TY-2482_chromosome | - | 1107663 | 1107950 | -0.540299587 | 0.983264 | 0.788495 | ciliary or flagellar mot |
| B7L8T6 | Flagellin                                | TY-2482_chromosome | - | 1107926 | 1108675 | -0.788604848 | 1.493723 | 1.230228 | ciliary or flagellar mot |
| B7L8W2 | Flagellar biosynthetic protein fliR      | TY-2482_chromosome | + | 1128681 | 1129463 | -1.608325282 | 7.775404 | 6.972788 | flagellum                |
| B7L8V4 | Flagellar protein                        | TY-2482_chromosome | + | 1123733 | 1124173 | -2.362341742 | 19.41986 | 18.14968 | flagellum                |
| B7L7T3 | Flagellar export pore protein            | TY-2482_chromosome | - | 1071530 | 1072675 | -1.644100213 | 12.6421  | 11.58913 | flagellum                |
| B7LGV4 | Flagellar brake protein YcgR (Cyclic di  | TY-2482_chromosome | - | 196514  | 197245  | -0.905261309 | 5.443705 | 4.788681 | flagellum                |
| B7L7T2 | Putative flagellar export pore protein   | TY-2482_chromosome | - | 1069459 | 1071534 | -1.721121873 | 16.15249 | 14.97315 | flagellum                |
| B7L8V8 | Flagellar motor switching and energiz    | TY-2482_chromosome | + | 1126875 | 1127285 | -2.462972409 | 27.41076 | 25.97152 | flagellum                |
| B7L8V9 | Flagellar biosynthesis protein           | TY-2482_chromosome | + | 1127291 | 1127653 | -2.257649185 | 24.29088 | 22.89635 | flagellum                |
| B7L8W0 | Flagellar biosynthesis protein           | TY-2482_chromosome | + | 1127656 | 1128390 | -2.209597051 | 21.44937 | 20.12848 | flagellum                |
| B7L8T9 | Flagellar protein FliT                   | TY-2482_chromosome | + | 1110764 | 1111126 | -1.039346    | 6.749012 | 6.008221 | flagellum                |
| B7L8V1 | Flagellar motor switching and energiz    | TY-2482_chromosome | + | 1120667 | 1121659 | -1.501752902 | 12.14062 | 11.10966 | flagellum                |
| B7L8V6 | Flagellar biosynthesis protein           | TY-2482_chromosome | + | 1125405 | 1125866 | -2.167864853 | 21.26301 | 19.95002 | flagellum                |
| B7L8V0 | Flagellar basal-body MS-ring and colla   | TY-2482_chromosome | + | 1119016 | 1120671 | -1.722798175 | 16.07035 | 14.89245 | flagellum                |
| B7L8T8 | Flagellar protein potentiates polymer    | TY-2482_chromosome | + | 1110354 | 1110761 | -1.315322089 | 10.16834 | 9.233269 | flagellum                |
| B7L8V7 | Flagellar motor switching and energiz    | TY-2482_chromosome | + | 1125874 | 1126875 | -2.369755704 | 26.18246 | 24.76116 | flagellum                |
| B7LBH5 | Flagella control of anti-sigma factor FI | TY-2482_chromosome | + | 1572303 | 1573295 | -1.016244854 | 6.574302 | 5.844886 | flagellum                |
| B7LG07 | Flagellar component of cell-proximal     | TY-2482_chromosome | + | 98819   | 99232   | -2.084601069 | 22.18933 | 20.85632 | flagellum                |
| B7LG09 | Flagellar hook assembly protein          | TY-2482_chromosome | + | 99655   | 100347  | -2.660640458 | 36.45637 | 34.80562 | flagellum                |
| B7L8T6 | Flagellin                                | TY-2482_chromosome | - | 1107663 | 1107950 | -0.540299587 | 0.983264 | 0.788495 | flagellum                |
| B7L8T6 | Flagellin                                | TY-2482_chromosome | - | 1107926 | 1108675 | -0.788604848 | 1.493723 | 1.230228 | flagellum                |
| B7L8T6 | Flagellin                                | TY-2482_chromosome | - | 1107663 | 1107950 | -0.540299587 | 0.983264 | 0.788495 | flagellum                |
| B7L8T6 | Flagellin                                | TY-2482_chromosome | - | 1107926 | 1108675 | -0.788604848 | 1.493723 | 1.230228 | flagellum                |
| B7L8V5 | Flagellar hook-length control protein    | TY-2482_chromosome | + | 1124173 | 1125297 | -2.22864103  | 20.49116 | 19.18975 | flagellum                |
| B7L8T6 | Flagellin                                | TY-2482_chromosome | - | 1107663 | 1107950 | -0.540299587 | 0.983264 | 0.788495 | flagellum                |

|        |                                          |                    |   |         |         |              |          |          |           |
|--------|------------------------------------------|--------------------|---|---------|---------|--------------|----------|----------|-----------|
| B7L8T6 | Flagellin                                | TY-2482_chromosome | - | 1107926 | 1108675 | -0.788604848 | 1.493723 | 1.230228 | flagellum |
| B7L8T6 | Flagellin                                | TY-2482_chromosome | - | 1107663 | 1107950 | -0.540299587 | 0.983264 | 0.788495 | flagellum |
| B7L8T6 | Flagellin                                | TY-2482_chromosome | - | 1107926 | 1108675 | -0.788604848 | 1.493723 | 1.230228 | flagellum |
| B7L8T7 | Putative Flagellar hook-associated prc   | TY-2482_chromosome | + | 1108923 | 1110335 | -0.913291902 | 5.060592 | 4.433059 | flagellum |
| B7LG16 | Flagellar hook-filament junction prote   | TY-2482_chromosome | + | 106176  | 107816  | -1.051375038 | 6.646817 | 5.911234 | flagellum |
| B7LG10 | Flagellar hook protein                   | TY-2482_chromosome | + | 100375  | 101577  | -2.842122089 | 33.76889 | 32.19591 | flagellum |
| B7LG11 | Flagellar component of cell-proximal     | TY-2482_chromosome | + | 101600  | 102352  | -2.85605793  | 34.85303 | 33.23111 | flagellum |
| B7LG08 | Flagellar component of cell-proximal     | TY-2482_chromosome | + | 99239   | 99640   | -2.412738353 | 26.97364 | 25.5396  | flagellum |
| B7LG12 | Flagellar component of cell-distal por   | TY-2482_chromosome | + | 102527  | 103306  | -3.198591603 | 40.81442 | 39.07415 | flagellum |
| B7LG17 | Flagellar hook-filament junction prote   | TY-2482_chromosome | + | 107831  | 108781  | -1.216986275 | 9.689261 | 8.778104 | flagellum |
| B7LG06 | Assembly protein for flagellar basal-b   | TY-2482_chromosome | - | 98008   | 98664   | -1.121578941 | 6.353191 | 5.63734  | flagellum |
| B7L7U2 | Protein that enables flagellar motor r   | TY-2482_chromosome | - | 1081816 | 1082739 | -0.224343206 | 0.561521 | 0.434802 | flagellum |
| B7L8V2 | Flagellar biosynthesis protein           | TY-2482_chromosome | + | 1121655 | 1122338 | -1.475435517 | 10.39348 | 9.446782 | flagellum |
| B7L7T1 | Putative uncharacterized protein flhE    | TY-2482_chromosome | - | 1069067 | 1069456 | -1.386000433 | 7.400901 | 6.624649 | flagellum |
| B7L609 | EAL domain containing protein involv     | TY-2482_chromosome | - | 2947401 | 2948165 | -0.573835882 | 2.245371 | 1.889437 | flagellum |
| B7L8W1 | Flagellar biosynthesis protein           | TY-2482_chromosome | + | 1128403 | 1128669 | -2.452854472 | 12.94898 | 11.8781  | flagellum |
| B7L524 | Putative flagellin structural protein; p | TY-2482_chromosome | + | 4456981 | 4459866 | 1.296863632  | 9.063902 | 8.183431 | flagellum |
| B7LG05 | Anti-sigma factor for FliA (Sigma 28)    | TY-2482_chromosome | - | 97639   | 97929   | 0.255570115  | 0.768019 | 0.608684 | flagellum |
| B7LHG1 | Flagellar system protein                 | TY-2482_chromosome | - | 4312906 | 4314642 | 0.775946355  | 3.138266 | 2.68059  | flagellum |
